# Supplementary material for: Kidney organoids recapitulate human basement membrane assembly in health and disease
Source: eLife journal article supplement (doi:10.7554/elife.73486), 2022-01-25
Supplement: supp [file elife-73486-supp-v1.zip]

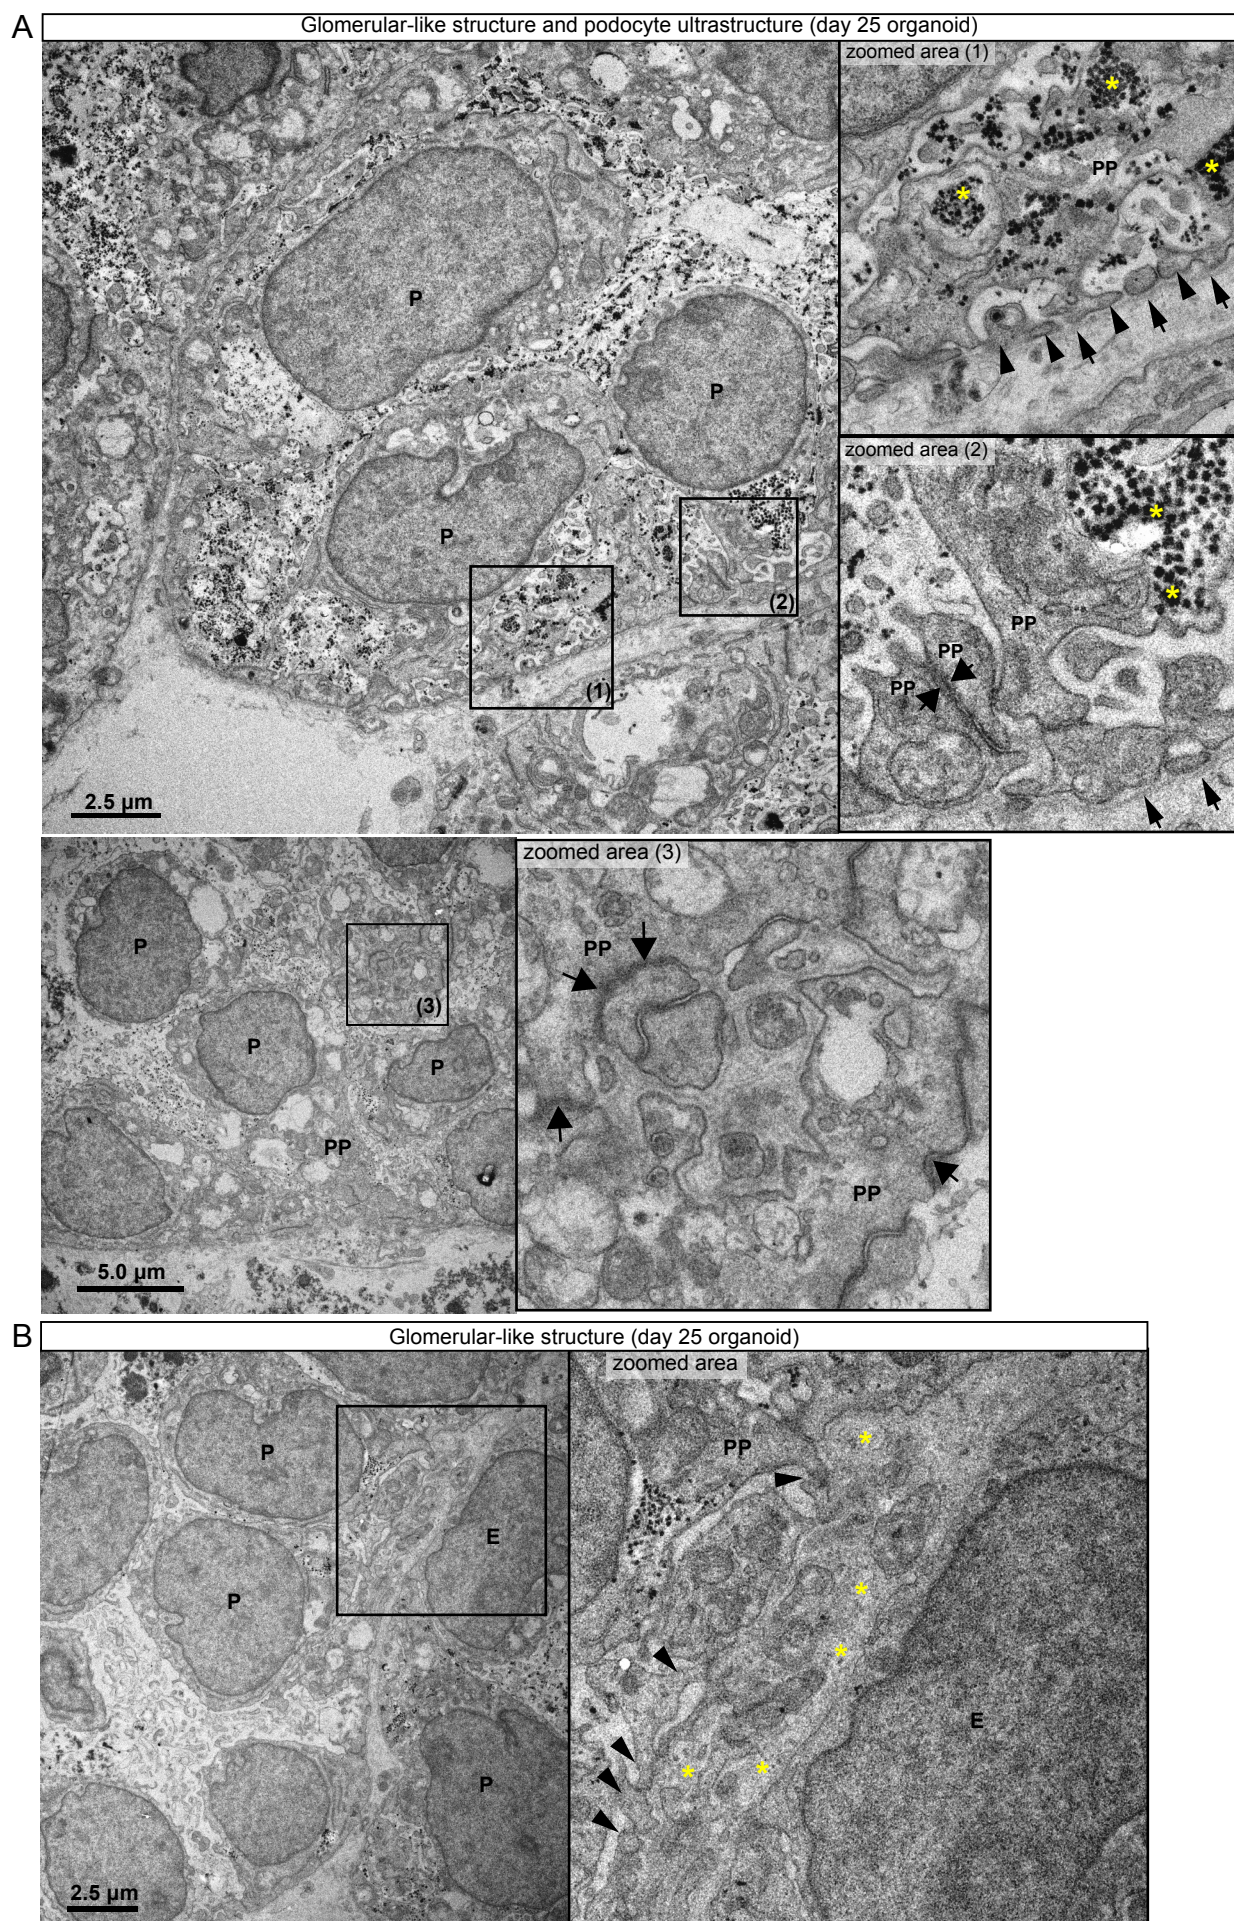

**Figure 1-figure supplement 2. Ultrastructure of glomerular-like structures in day 25 human kidney organoids.**  
 (A) Transmission electron microscopy of day 25 kidney organoids show advanced differentiation of glomerular structures. In the zoomed areas (1 and 2) note podocytes (P) displaying long branching primary processes (PP) and a layer of intercalated foot processes (thin arrow) lining a distinct basement membrane (thin arrows). Asterisks indicate accumulation of glycogen granules, and large arrowheads tight cell junctions between maturing podocyte processes. In the lower panels, note in the zoomed area (3) a deposition of basement membrane-like matrix between podocyte processes within a glomerular structure. (B) Note the presence of likely endothelial cells (E) and podocytes (P). In the zoomed area, note a layer of podocyte foot processes (arrowheads) and an endothelial cell (E), but deposition of matrix- and BM-like electron-dense material in between (asterisks).
