# Supplementary material for: Kidney organoids recapitulate human basement membrane assembly in health and disease
Source: eLife journal article supplement (doi:10.7554/elife.73486), 2022-01-25
Supplement: supp [file elife-73486-supp-v1.zip]

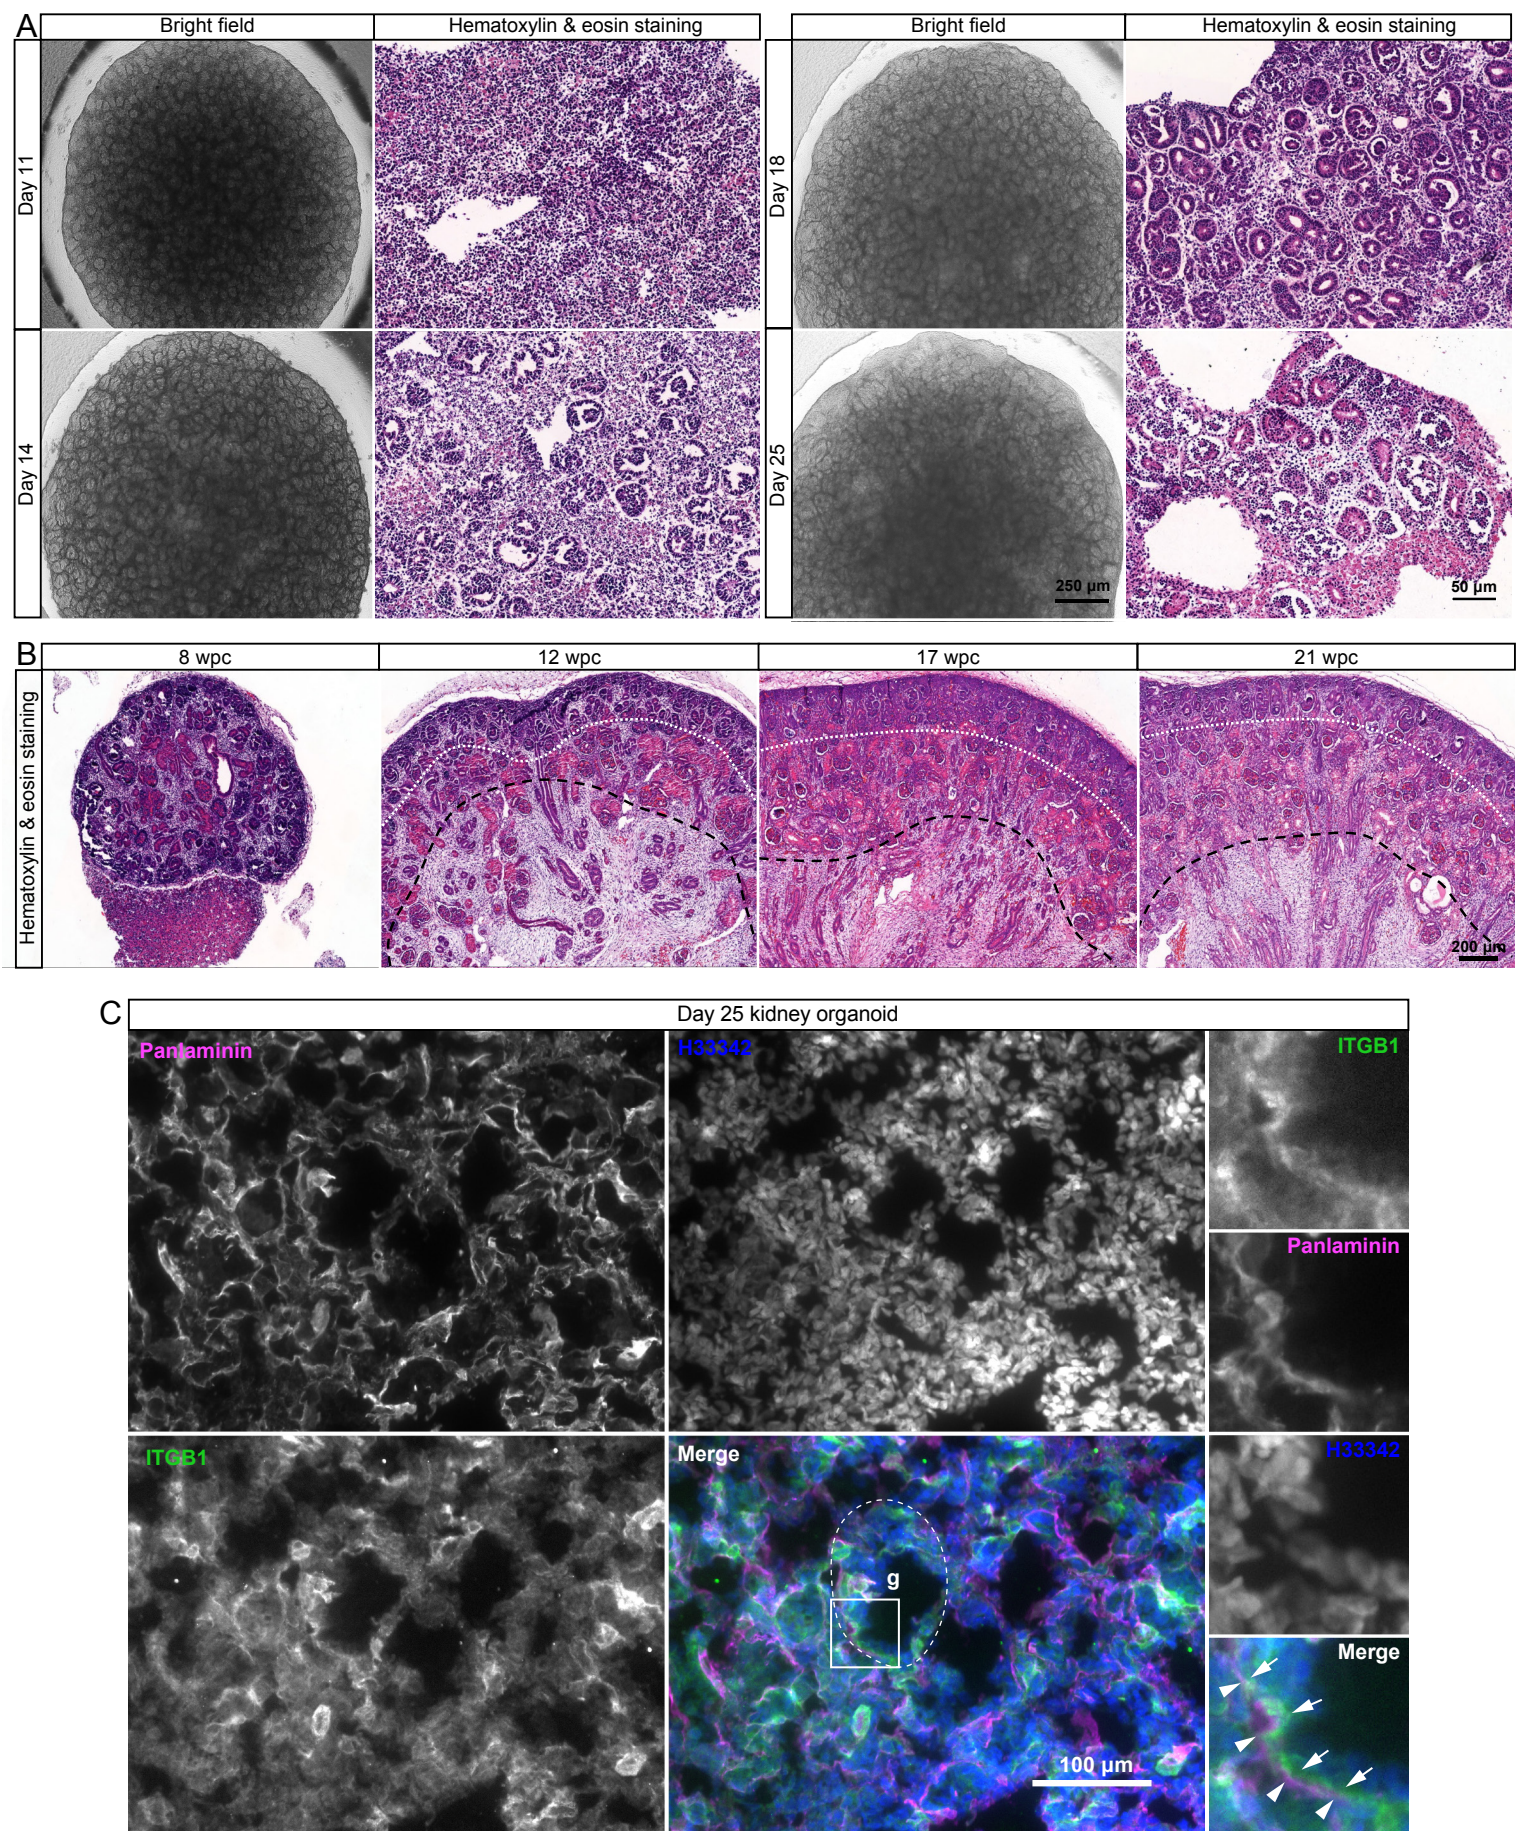

**Figure 1-figure supplement 1. Morphological characteristics of wild-type kidney organoids and fetal human kidney.** (A) Bright field images (left) and H&E staining (right) of human kidney organoids on day 11, 14, 18 and 25 of differentiation. (B) H&E staining of human fetal kidney at 8 wpc, 12 wpc, 17 wpc, and 21 wpc highlights normal human kidney development. (C) Immunofluorescence for integrin beta-1 (ITGB1) in day 25 kidney organoid (wild-type). Anti-panlaminin or anti-collagen IV antibodies were used to label basement membranes. In the glomerulus (g), note the distribution of ITGB1 adjacent to the basement membrane.
