# Supplementary material for: Kidney organoids recapitulate human basement membrane assembly in health and disease
Source: eLife journal article supplement (doi:10.7554/elife.73486), 2022-01-25
Supplement: supp [file elife-73486-supp-v1.zip]

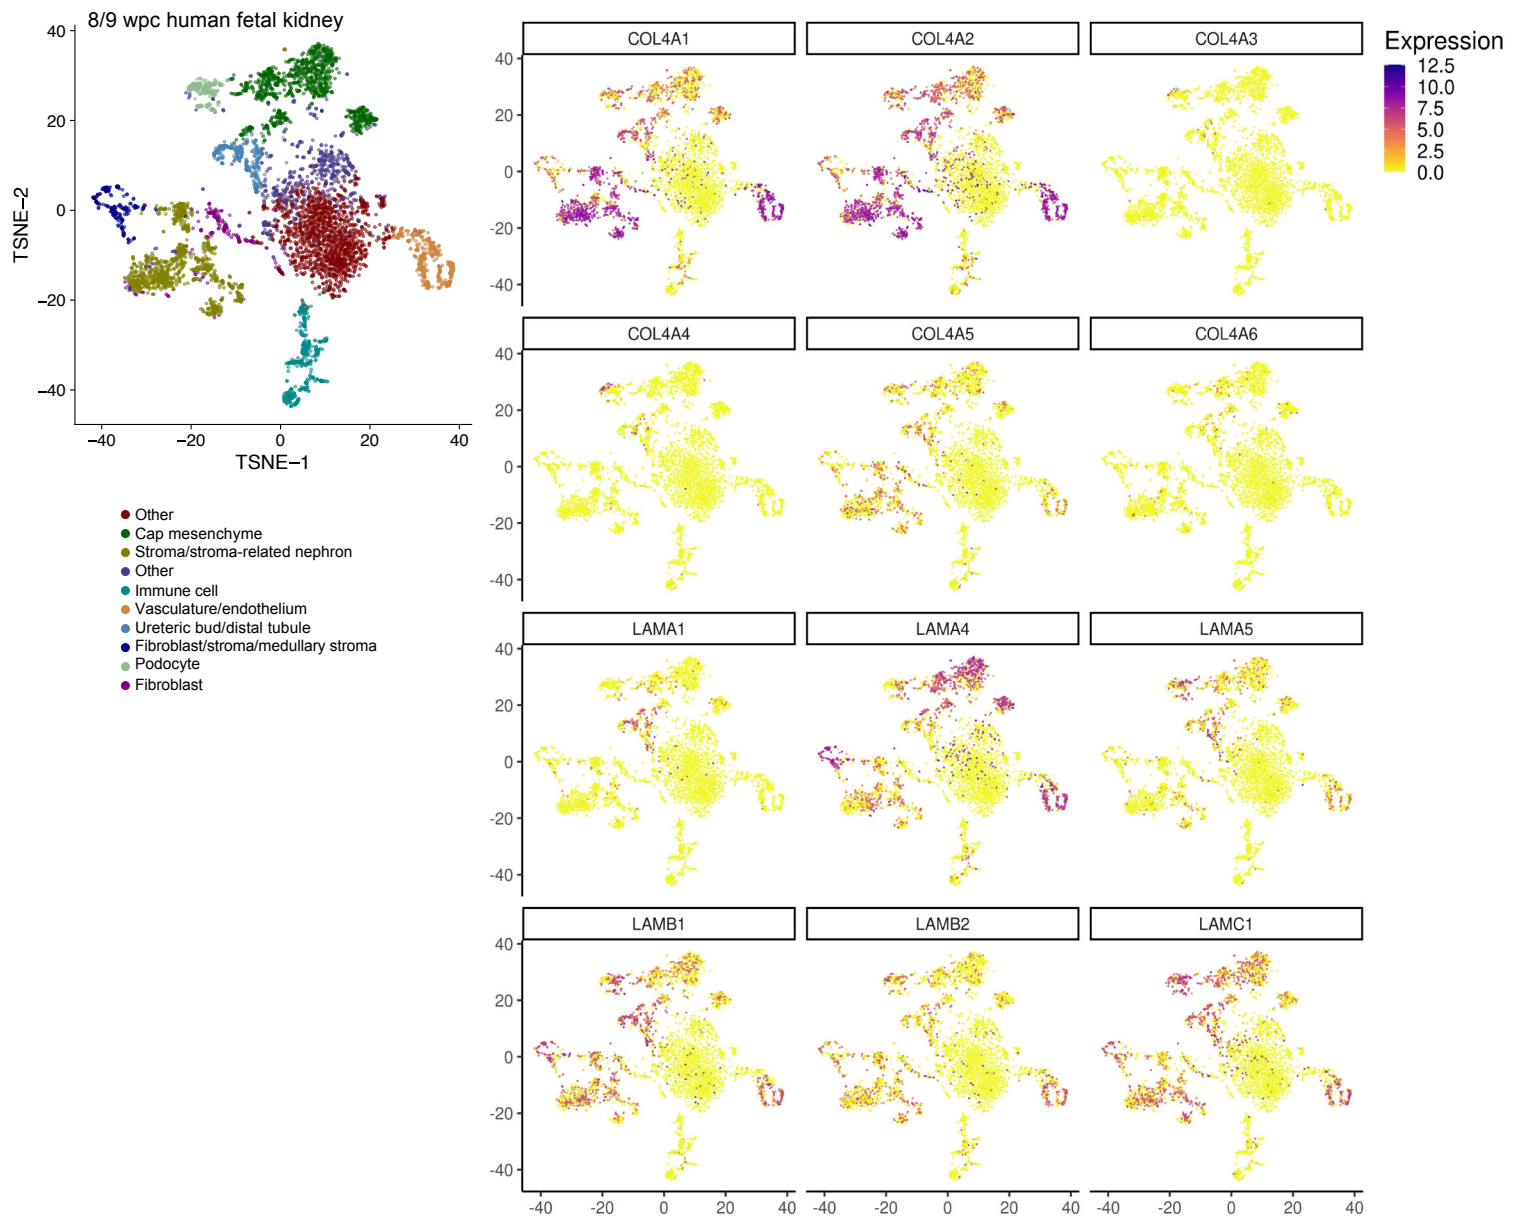

**Figure 5-figure supplement 2. Single-cell RNA sequencing analysis of human fetal kidney.**

Re-analysis of 8/9-wpc human kidney scRNA-seq datasets (EGAS00001002325, EGAS00001002553; Young et al., 2018) confirms cellular specificity for collagen IV and laminin isoform gene expression. tSNE plots represent the cell type clusters identified, and colour intensity indicates the cell-specific level of expression for the selected BM genes.
