# Supplementary material for: Kidney organoids recapitulate human basement membrane assembly in health and disease
Source: eLife journal article supplement (doi:10.7554/elife.73486), 2022-01-25
Supplement: supp [file elife-73486-supp-v1.zip]

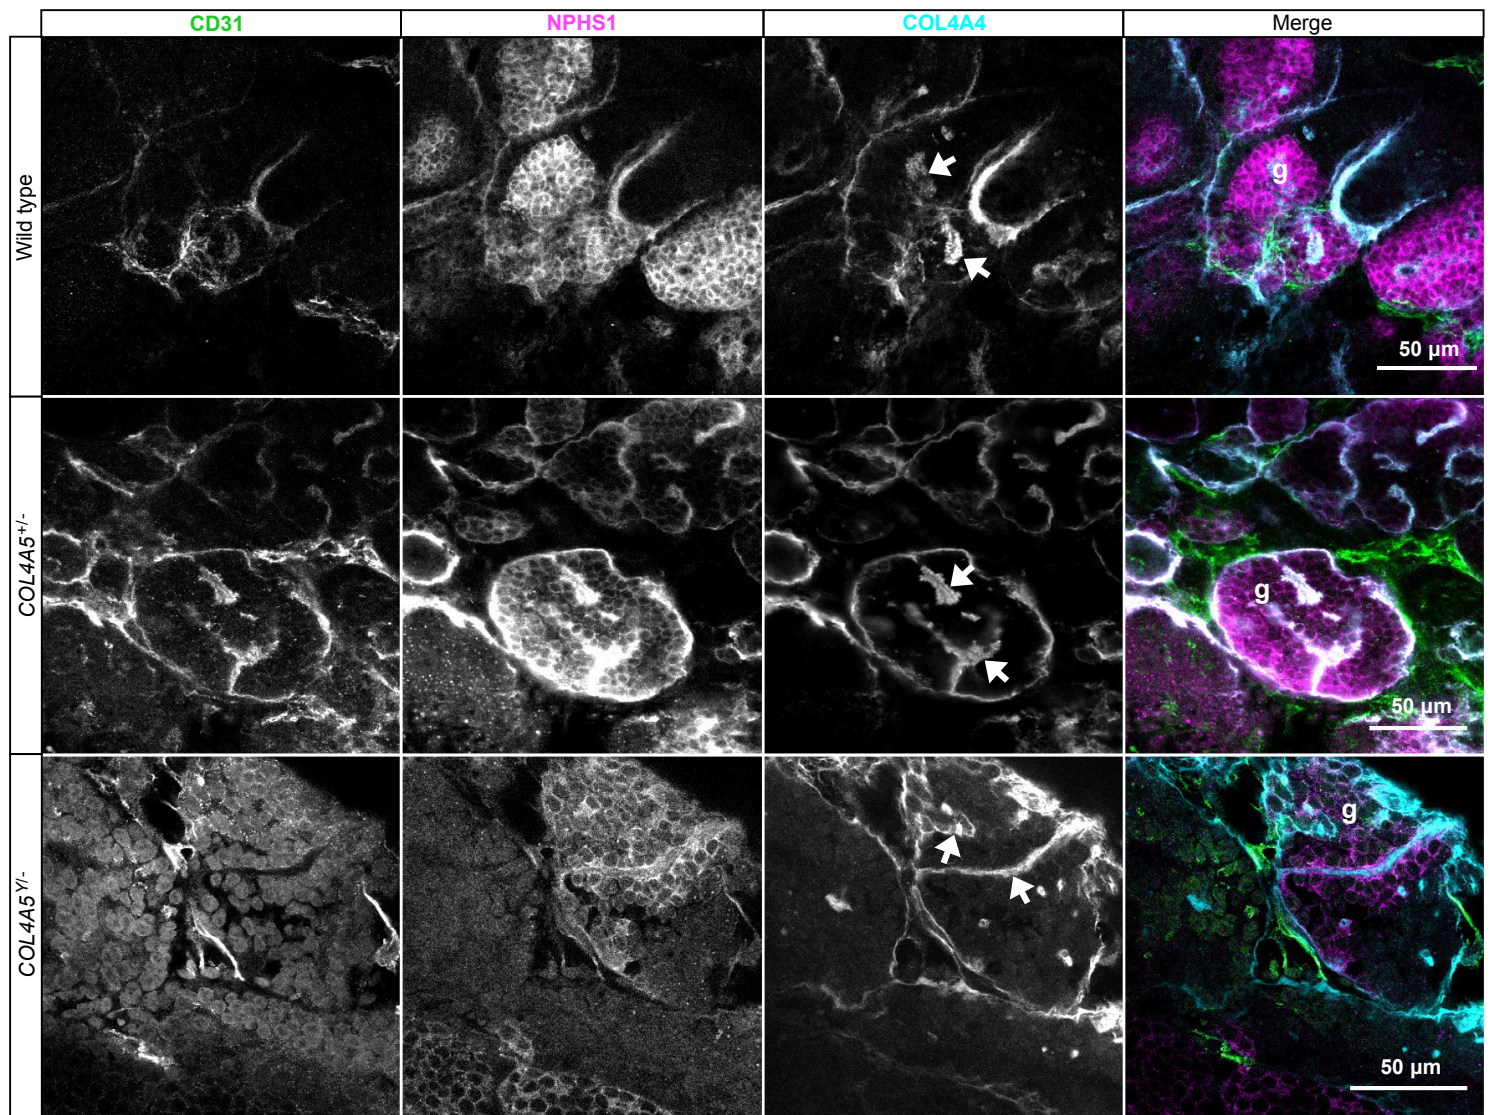

**Figure 1-figure supplement 3. Differentiation of wild-type and Alport kidney organoids.**

Whole-mount immunofluorescence of wild-type and Alport kidney organoids shows comparable deposition of COL4A4 in BM-like structures (arrows) within NPHS1<sup>+</sup>/CD31<sup>+</sup> glomerular-like structures (g).
