# Supplementary material for: Kidney organoids recapitulate human basement membrane assembly in health and disease
Source: eLife journal article supplement (doi:10.7554/elife.73486), 2022-01-25
Supplement: supp [file elife-73486-supp-v1.zip]

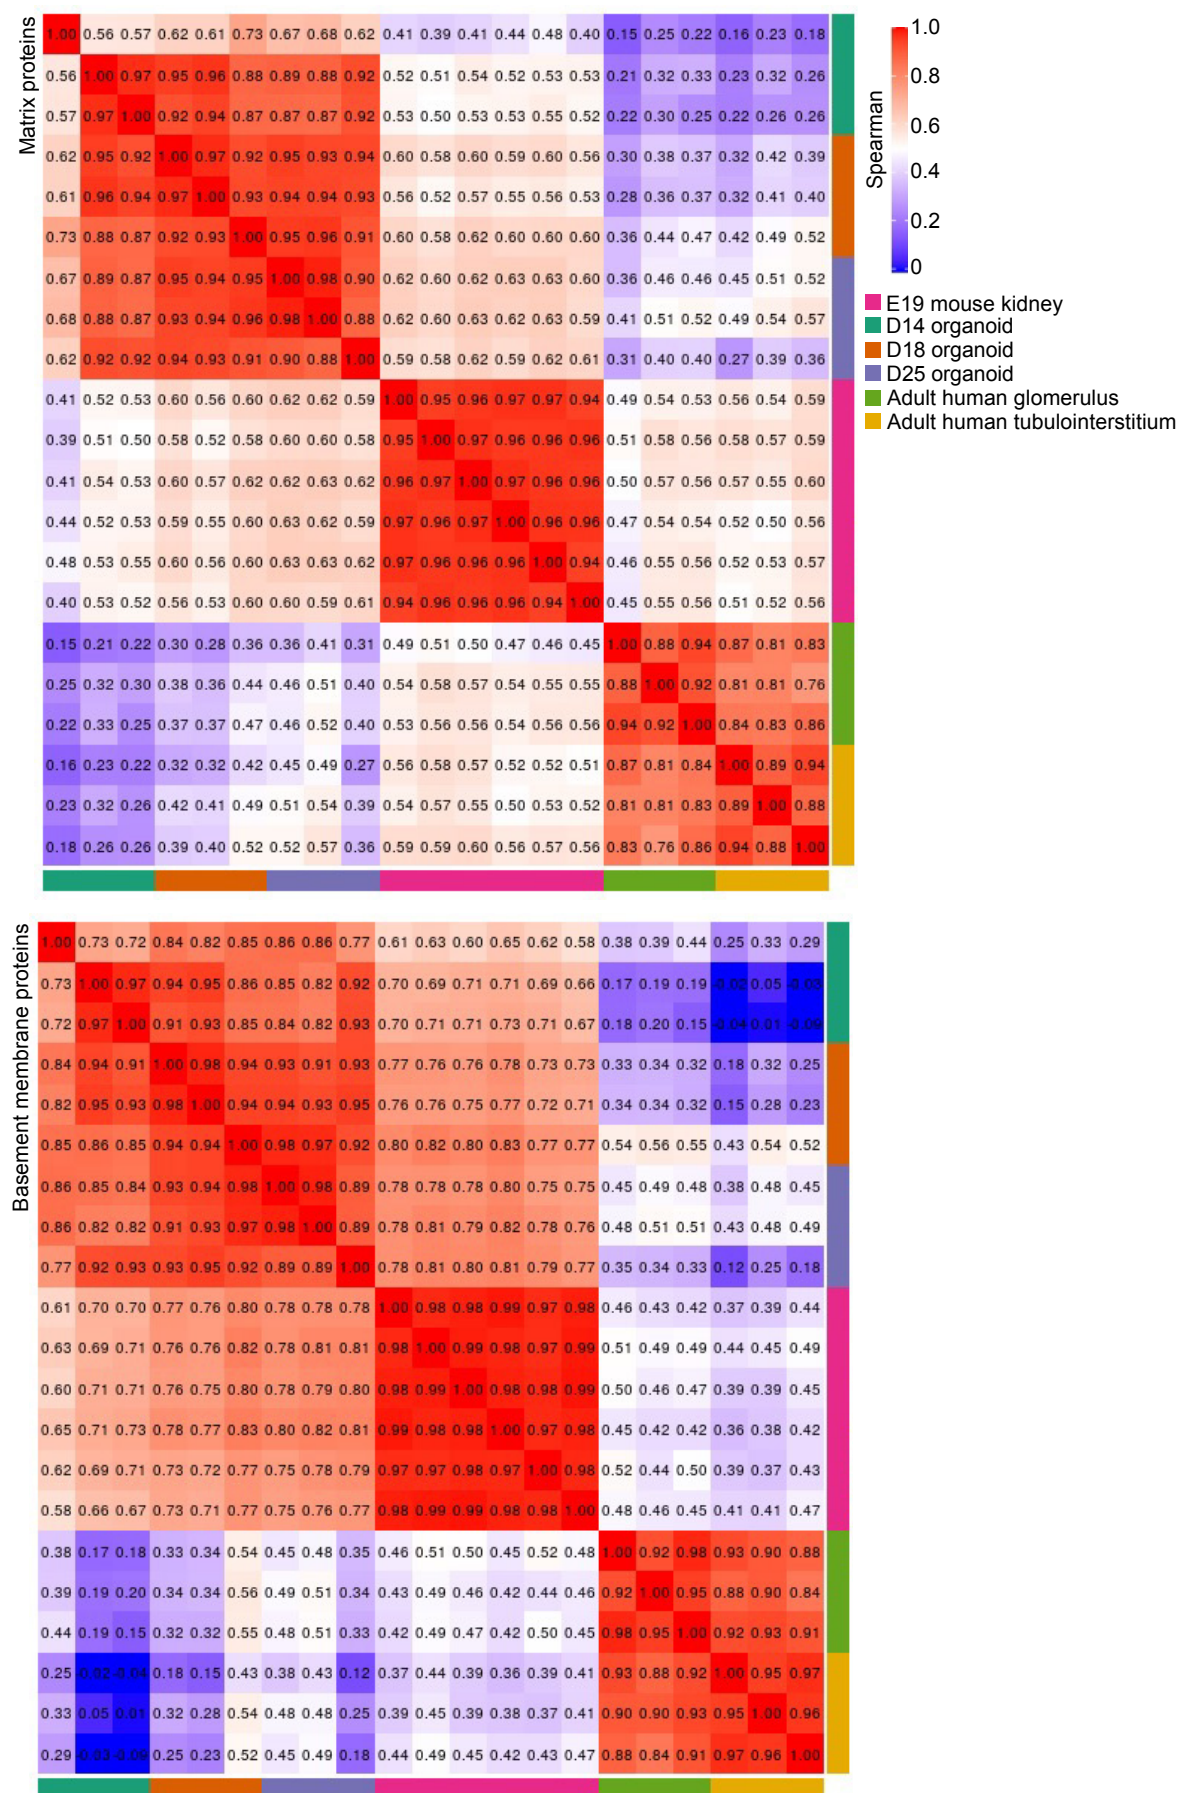

**Figure 6-figure supplement 1. Integrated correlational analysis of organoid and *in vivo* kidney datasets.** Spearman rank correlation plots depicting the  $r$  coefficient values for matrix and BM protein abundance (ECM fraction) between E19 mouse kidney, kidney organoids and adult human kidney proteomic datasets.
