# Supplementary material for: Kidney organoids recapitulate human basement membrane assembly in health and disease
Source: eLife. 2022 Jan 25;11:e73486. doi: 10.7554/eLife.73486 (PMC8849328; doi:10.7554/eLife.73486)
Supplement: Supplementary file 1. [file elife-73486-supp1.xlsx]

## Sheet: Human fetal kidney manifest
Human fetal kidney manifest
Kidney ID	Developmental stage in post-conception weeks (pcw) or Carnegie stage (cs)	Embryo/fetus
13878	cs23/8+pcw	Embryo
11295	10pcw	Fetus
13891	12pcw	Fetus
13842	17pcw	Fetus
1358	21pcw	Fetus
Samples are listed in ascending age. Kidney ID is assigned by the Human Developmental Biology Resource. Embryo is defined as zygote to 8pcw, cs is defined as 1-56 post-conception days, fetus is defines as 8pcw or more.

## Sheet: Human induced pluripotent stem 
Human induced pluripotent stem cells
	Barcode	HMDMC	Supplier sample name	Donor	Date of sample	Gender	Parent line	Friendly name	Accession number	Description	Passage	GMO status	Species	Culture Media	Morphology	Growth Mode	Bank date	Age	eGFR [age at transplant]	Gender	Ethnicity	HMDMC	Gene	Mutation 1	Mutation 2
Mother	CGAP-38728	16_010	004c711b-c26a-4b43-9f93-c3c84f4e732e	d452e93c-27f3-4b70-9750-2a293633b6d7	2017-08-01	Unknown	N	HPSI0416i-sevr_1	SAMEA4562350	Induced pluripotent stem cell	passage 18	CytoTune 2	Human	E8	Undifferentiated	Adherent	22.09.2016	51	85	Female	Caucasian	16_010	COL4A5	C.3695G>A;p.Gly1232Asp	COL4A4 c.3286C>T;p.Pro1096Ser [VUS]
Daughter	CGAP-4852B	16_010	39774c1c-176c-494e-95ce-445f02be3329	92b0905a-5a4b-4759-bb43-9ec96392f1fe	2017-08-01	Unknown	N	HPSI0416i-mapx_5	SAMEA4679668	Induced pluripotent stem cell	passage 20	CytoTune 2	Human	E8	Undifferentiated	Adherent	11.10.2016	26	90	Female	Chinese/Caucasian	16_010	COL4A5	C.3695G>A;p.Gly1232Asp
Son	CGAP-581E8	16_010	1e88584c-1e9c-4412-8076-bcf634204508	adf2e90e-d04d-4954-a75b-70b7f5fe82ab	2017-08-01	Unknown	N	HPSI0516i-yist_3	SAMEA4673668	Induced pluripotent stem cell	passage 19	CytoTune 2	Human	E8	Undifferentiated	Adherent	28.10.2016	22	[19]	Male	Chinese/Caucasian	16_010	COL4A5	C.3695G>A;p.Gly1232Asp	COL4A4 c.3286C>T;p.Pro1096Ser [VUS]
Wild-type	Generated by Faris Tengku and Steven Woods in Prof Susan J. Kimber's lab					Female
All iPSCs derived from patients with Alport syndrome were generated by Sanger Institue and obtained from the Human Induced Pluripotent Stem Cell Initiative (HipSci).
All human cell lines have been authenticated using short tandem repeat (STR) profiling.
All experiments were performed with mycoplasma-free cells.
