# Supplementary material for: Kidney organoids recapitulate human basement membrane assembly in health and disease
Source: eLife. 2022 Jan 25;11:e73486. doi: 10.7554/eLife.73486 (PMC8849328; doi:10.7554/eLife.73486)
Supplement: Supplementary file 2. [file elife-73486-supp2.xlsx]

## Sheet: Cellular fraction (all)
Protein FDR Confidence: Combined	Master	Accession	Description	Exp. q-value: Combined	Sum PEP Score	Coverage [%]	# Peptides	# PSMs	# Unique Peptides	# AAs	MW [kDa]	calc. pI	Score Mascot: Mascot	Score Sequest HT: Sequest HT	# Peptides (by Search Engine): Mascot	# Peptides (by Search Engine): Sequest HT	Pfam IDs	Entrez Gene ID	Ensembl Gene ID	Gene Symbol	Abundance Ratio: (Day 18) / (Day 14)	Abundance Ratio: (Day 25) / (Day 14)	Abundance Ratio: (Day 25) / (Day 18)	Abundance Ratio P-Value: (Day 18) / (Day 14)	Abundance Ratio P-Value: (Day 25) / (Day 14)	Abundance Ratio P-Value: (Day 25) / (Day 18)	Abundance Ratio Variability [%]: (Day 18) / (Day 14)	Abundance Ratio Variability [%]: (Day 25) / (Day 14)	Abundance Ratio Variability [%]: (Day 25) / (Day 18)	Abundances (Normalized): F1: Sample, Day 14	Abundances (Normalized): F4: Sample, Day 14	Abundances (Normalized): F7: Sample, Day 14	Abundances (Normalized): F2: Sample, Day 18	Abundances (Normalized): F5: Sample, Day 18	Abundances (Normalized): F8: Sample, Day 18	Abundances (Normalized): F3: Sample, Day 25	Abundances (Normalized): F6: Sample, Day 25	Abundances (Normalized): F9: Sample, Day 25	Abundance: F1: Sample, Day 14	Abundance: F4: Sample, Day 14	Abundance: F7: Sample, Day 14	Abundance: F2: Sample, Day 18	Abundance: F5: Sample, Day 18	Abundance: F8: Sample, Day 18	Abundance: F3: Sample, Day 25	Abundance: F6: Sample, Day 25	Abundance: F9: Sample, Day 25	# Protein Groups	Modifications
High	Master Protein	A0A024QZ89	component of oligomeric golgi complex 4, isoform CRA_d [OS=Homo sapiens]	0	31.449	8	4	30	4	789	89.5	5.21	504	30.72	4	4	Pf08318	25839		COG4	1.092	1.175	0.807	0.807951	0.454212	0.768975	42.88	49.45	23.64	760062	1.24821e+06	1.30858e+06	1.04108e+06	1.35973e+06	2.05522e+06	1.4493e+06	680636	1.60377e+06	331800	1.06378e+06	1289827	632298	627298	2.05522e+06	1.23701e+06	379022	1.4429e+06	1
High	Master Protein	A0A024QZN6	Retinoic acid induced 17, isoform CRA_a [OS=Homo sapiens]	0	4.465	1	2	6	2	1073	116.1	7.44	37	1.75	2	2	Pf02891, Pf09770, Pf11789	57178		ZMIZ1	0.75	0.892	1.126	0.236326	0.916217	0.525125	18.78	21.96	24.58	735170	942667	1.02469e+06	568339	702627	925734	700521	736125	994665	320933	803382	1.01e+06	345181	324150	925734	597911	409922	894896	1
High	Master Protein	A0A024QZR3	Protein pelota homolog [OS=Homo sapiens]	0	28.89	14	5	28	5	385	43.4	6.34	271	13.59	5	5	Pf03463, Pf03464, Pf03465	53918		PELO	1.099	0.812	0.728	0.661143	0.801415	0.419842	23.74	14.64	8.76	1.97264e+06	1.97316e+06	1.8404e+06	2.05084e+06	2.84103e+06	1.19949e+06	874925	1.42058e+06	585227	861140	1.68161e+06	1.81402e+06	1.24558e+06	1.31068e+06	1.19949e+06	746769	791068	526526	1
High	Master Protein	A0A024QZW7	nucleoporin 153kDa, isoform CRA_a [OS=Homo sapiens]	0	224.053	27	27	203	27	1475	153.9	8.73	2346	198.51	27	26	Pf00641, Pf08604, Pf10599	9972		NUP153	0.969	0.827	0.849	0.836155	0.963853	0.7878	30.26	32.03	34.31	2.34837e+07	1.78498e+07	1.58591e+07	1.98243e+07	1.55718e+07	2.32032e+07	1.50571e+07	1.04825e+07	2.47382e+07	1.02516e+07	1.52124e+07	1.56317e+07	1.20403e+07	7.18389e+06	2.32032e+07	1.28516e+07	5.83732e+06	2.22568e+07	1
High	Master Protein	A0A024R0F6	tripartite motif-containing 33, isoform CRA_a [OS=Homo sapiens]	0	67.109	9	8	52	7	1127	122.4	6.67	428	53.19	7	8	Pf00439, Pf00628, Pf00643, Pf13639	51592		TRIM33	1.008	0.763	0.788	0.985705	0.785549	0.679626	27.8	22.06	26.87	3.58541e+06	4.60222e+06	5.04951e+06	4.36366e+06	4.77811e+06	4.61886e+06	3.74366e+06	3.41072e+06	4.75091e+06	1.56518e+06	3.92222e+06	4.97713e+06	2.65027e+06	2.20433e+06	4.61886e+06	3195302	1.89931e+06	4.27437e+06	1
High	Master Protein	A0A024R0L2	Uncharacterized protein [OS=Homo sapiens]	0	12.413	8	2	12	2	397	44.7	4.81	156	9.4	2	2	Pf09747	90324		CCDC97	0.925	0.903	0.735	0.745289	0.901749	0.437614	41.61	54.5	39.19	230723	465498	755297	438299	661915	304971	224045	114325	356898	100721	396718	744470	266201	305368	304971	191228	63663.6	321099	1
High	Master Protein	A0A024R0S8	X-ray repair complementing defective repair in Chinese hamster cells 1, isoform CRA_b [OS=Homo sapiens]	0	141.475	29	15	183	15	633	69.5	6.39	1749	180.56	15	15	Pf00533, Pf01834, Pf12738	7515		XRCC1	1.26	0.821	0.659	0.207428	0.97921	0.214731	26.81	49.3	30.11	1.50031e+07	1.43892e+07	1.62919e+07	1.70837e+07	1.6681e+07	2.30725e+07	1.3693e+07	7.08434e+06	2.46871e+07	6.54948e+06	1.22631e+07	1.60584e+07	1.03758e+07	7.69561e+06	2.30725e+07	1.16873e+07	3.94502e+06	2.22109e+07	1
High	Master Protein	A0A024R1E1	activating signal cointegrator 1 complex subunit 2, isoform CRA_a [OS=Homo sapiens]	0	10.746	7	2	4	2	643	73.2	5.11	26	0	2	2	Pf02845	84164		ASCC2	1.389	0.858	0.673	0.260333	0.80397	0.292955	24.04	33.02	15.13	585439	840710	666350	1.16952e+06	1.00199e+06	562854	641487	121423	466415	255569	716490	656798	710306	462260	562854	547524	67616.1	419631	1
High	Master Protein	A0A024R1N2	Zinc finger CCCH-type containing 7B, isoform CRA_b [OS=Homo sapiens]	0	6.532	5	3	20	3	621	70.2	9.19	18	3.55	3	2	Pf00642, Pf12171	23264		ZC3H7B	1.166	1.029	0.768	0.46641	0.567246	0.599464	41.19	56.31	30.13	4.47684e+06	3.25819e+06	2.2088e+06	3.64919e+06	5.6006e+06	5.29637e+06	4.52771e+06	563365	4.74516e+06	1.95433e+06	2.77677e+06	2.17714e+06	2.21633e+06	2.58378e+06	5.29637e+06	3.86451e+06	313718	4.2692e+06	1
High	Master Protein	A0A024R1S5	GTP binding protein 1, isoform CRA_c [OS=Homo sapiens]	0	89.119	27	10	93	10	660	71.4	8.22	1191	111.92	9	10	Pf00009, Pf03143, Pf03144	9567		GTPBP1	1.044	0.877	0.846	0.759808	0.783641	0.942326	39.35	31.75	32.18	6.29728e+06	8.20807e+06	8.96403e+06	8.90017e+06	7.10948e+06	7.93568e+06	5.93042e+06	4.18275e+06	1.00433e+07	2.74903e+06	6.99528e+06	8.83554e+06	5.40552e+06	3.27989e+06	7.93568e+06	5.06176e+06	2.32923e+06	9.03592e+06	1
High	Master Protein	A0A024R201	proteasome (prosome, macropain) 26S subunit, non-ATPase, 13, isoform CRA_a [OS=Homo sapiens]	0	185.452	58	18	271	1	376	42.9	5.81	3182	305.03	17	18	Pf01399	5719		PSMD13	1.164	0.944	0.803	0.419269	0.633116	0.999628	58.71	37.71	32.11	4.11443e+07	7.19632e+07	8.55211e+07	3.62383e+07	3.97981e+07	4.64623e+07	8.64618e+07	4.80232e+07	3.7188e+07	1.79613e+07	6.13302e+07	8.42952e+07	2.20093e+07	1.83605e+07	4.64623e+07	7.37972e+07	2.67424e+07	3.34578e+07	1
High	Master Protein	A0A024R210	Interferon induced transmembrane protein 1 (9-27), isoform CRA_a [OS=Homo sapiens]	0	44.183	30	2	58	1	125	13.9	7.93	594	139.77	1	2	Pf04505	8519		IFITM1	0.701	0.383	0.558	0.0391203	0.0117916	0.0371084	34.95	8.83	26.26	1.96846e+07	1.557e+07	6.0961e+06	1.3438e+07	8.10544e+06	6.18316e+06	6.38794e+06	1.73857e+06	6.96675e+06	8.59318e+06	1.32695e+07	6.00871e+06	8.16157e+06	3.73937e+06	6.18316e+06	5.45226e+06	968145	6.26795e+06	1	Acetyl [N-Term]
High	Master Protein	A0A024R228	Heterogeneous nuclear ribonucleoprotein K, isoform CRA_d [OS=Homo sapiens]	0	526.842	71	35	1577	2	463	51.2	5.64	23007	2215.83	33	35	Pf00013, Pf08067, Pf13014, Pf13083	3190		HNRNPK	1.213	0.879	0.703	0.238269	0.779608	0.35542	48.32	31.55	13.35	3.40924e+06	8.15577e+06	5.99435e+06	8.21241e+06	8.75664e+06	5.76539e+06	4.91516e+06	5.93033e+06	4.9704e+06	1.48828e+06	6.95071e+06	5.90842e+06	4.98781e+06	4.0398e+06	5.76539e+06	4.19521e+06	3.30239e+06	4.47184e+06	1	Oxidation [P386]; Acetyl [N-Term]
High	Master Protein	A0A024R233	tight junction protein 2 (zona occludens 2), isoform CRA_a [OS=Homo sapiens]	0	56.841	10	9	71	9	1190	133.9	7.4	501	79.14	9	9	Pf00595, Pf00625, Pf07653, Pf13180	9414		TJP2	1.512	1.658	1.064	0.0214876	0.0299217	0.216188	32	27.65	35.14	3.57978e+06	3.55847e+06	4.06806e+06	5.72691e+06	5.36495e+06	5.96978e+06	6.58406e+06	517735	5.96349e+06	1.56273e+06	3.03268e+06	4.00975e+06	3.47824e+06	2.47507e+06	5.96978e+06	5.61965e+06	288308	5.36532e+06	1
High	Master Protein	A0A024R254	melanoma antigen family D, 1, isoform CRA_a [OS=Homo sapiens]	0	27.458	7	3	10	2	778	86.1	5.83	128	13.17	3	3	Pf00874, Pf01454	9500		MAGED1	1.559	1.682	1.037	0.143622	0.236215	0.760508	49.58	62.82	77.15	100793	380415		606315	344386	597660	485608	69577	809345	44000.5	324206		368245	158879	597660	414477	38744.9	728164	1
High	Master Protein	A0A024R2G1	Cysteine-rich with EGF-like domains 1, isoform CRA_b [OS=Homo sapiens]	0	33.837	23	6	40	6	420	45.4	4.87	703	37.48	6	6	Pf07645, Pf11938	78987		CRELD1	1.287	0.862	0.817	0.164781	0.939559	0.835932	28.59	74.28	41.8	5.66427e+06	4.09384e+06	3.13183e+06	5.93447e+06	5.32518e+06	4.56418e+06	6.3064e+06	374476	4.31036e+06	2.4727e+06	3.48895e+06	3.08693e+06	3.6043e+06	2.45672e+06	4.56418e+06	5.38266e+06	208532	3.87801e+06	1
High	Master Protein	A0A024R2K4	Leucine rich repeat (In FLII) interacting protein 2, isoform CRA_b [OS=Homo sapiens]	0	9.214	2	1	8	1	742	84.1	6.98	16	0	1	1	Pf01576, Pf02463, Pf04111, Pf05557, Pf09738, Pf13514, Pf13870	9209		LRRFIP2	0.829	1.102	1.247	0.454691	0.7454	0.437174	20.05	69.28	66.86	651302	400546	441069	315070	365619	646142	319687		990131	284321	341363	434747	191358	168675	646142	272860		890816	1
High	Master Protein	A0A024R2M8	xeroderma pigmentosum, complementation group C, isoform CRA_a [OS=Homo sapiens]	0	36.357	8	4	20	4	940	105.9	8.92	103	23.71	4	4	Pf03835, Pf10403, Pf10404, Pf10405	7508		XPC	1.085	1.004	0.926	0.71353	0.643217	0.820032	18.94	49.91	55.74	2.50596e+06	2.77718e+06	2.86027e+06	2.9303e+06	2.64046e+06	5.41899e+06	3.53519e+06	593760	4.40936e+06	1.09396e+06	2.36684e+06	2.81927e+06	1779718	1.21815e+06	5.41899e+06	3.01736e+06	330644	3.96708e+06	1
High	Master Protein	A0A024R2W4	dystroglycan 1 (dystrophin-associated glycoprotein 1), isoform CRA_a [OS=Homo sapiens]	0	8.354	2	1	8	1	895	97.5	8.56	100	13.05	1	1	Pf05454	1605		DAG1	1.517	2.319	1.507	0.177345	0.048983	0.147734	7.47	4.92	10.36	273162	278908	259391	406660	393518	1.1133e+06	602956		645017	119247	237698	255673	246985	181546	1.1133e+06	514637		580318	1
High	Master Protein	A0A024R2Z6	Guanine nucleotide binding protein-like 3 (Nucleolar), isoform CRA_b [OS=Homo sapiens]	0	91.875	32	13	50	13	537	60.5	8.79	558	43.5	13	13	Pf01926, Pf02421, Pf08701	26354		GNL3	0.921	0.847	1.093	0.672959	0.85708	0.204701	22.24	59.11	71.7	7.55318e+06	7.73945e+06	7.19467e+06	6.71081e+06	6.9777e+06	5.05897e+06	4.18951e+06	1.554e+07	4.5127e+06	3.29729e+06	6.5959e+06	7.09154e+06	4.07581e+06	3.2191e+06	5.05897e+06	3.57585e+06	8.65368e+06	4.06005e+06	1
High	Master Protein	A0A024R326	60S ribosomal protein L29 [OS=Homo sapiens]	0	31.696	15	3	119	3	157	17.5	11.66	1600	134.37	3	3	Pf01779	6159		RPL29	1.175	1.049	1.149	0.385149	0.40475	0.0387437	32.77	116.12	88.21	6.07657e+07	5.66881e+07	6.48161e+07	6.98884e+07	6.4238e+07	5.20143e+07	6.07055e+07	8.30738e+06	8.18143e+07	2.65268e+07	4.83121e+07	6.3887e+07	4.24467e+07	2.96356e+07	5.20143e+07	51813547	4.62608e+06	7.36079e+07	1
High	Master Protein	A0A024R394	Cysteine and histidine-rich domain (CHORD)-containing 1, isoform CRA_c [OS=Homo sapiens]	0	71.619	32	7	43	7	332	37.5	7.72	299	37.12	7	7	Pf04968, Pf04969	26973		CHORDC1	1.074	0.714	0.744	0.796838	0.578184	0.409212	51.11	36.34	36.49	1.89392e+06	3.32457e+06	4.58169e+06	3.68909e+06	3.70506e+06	2.84005e+06	2.63827e+06	874730	3.03291e+06	826777	2.83334e+06	4.51602e+06	2.24057e+06	1.7093e+06	2.84005e+06	2.25183e+06	487106	2.72869e+06	1
High	Master Protein	A0A024R3B9	Alpha-crystallin B chain [OS=Homo sapiens]	0.003	2.439	16	1	2	1	108	12.2	8.46	0	0	1	1	Pf00011	1410	ENSG00000109846.7	CRYAB	100	100	0.23	1e-17	1e-17	8.15268e-08			5.34						1.24711e+06	542499		151125						1.24711e+06	463036		135967	1
High	Master Protein	A0A024R3R5	lamin B receptor, isoform CRA_a [OS=Homo sapiens]	0	105.403	25	13	139	13	615	70.7	9.36	1498	144.35	13	13	Pf01222, Pf06966, Pf09465	3930		LBR	0.839	0.548	0.663	0.216653	0.176776	0.271394	42.66	14.24	31.06	5.68508e+07	4.45946e+07	3.17524e+07	3.68836e+07	5.28384e+07	1.18855e+07	2.58211e+07	2.22323e+07	1.94537e+07	2.48178e+07	3.80055e+07	3.12972e+07	2.24012e+07	2.43765e+07	1.18855e+07	2.20389e+07	1.23804e+07	1.75024e+07	1
High	Master Protein	A0A024R3Z1	microtubule-associated protein [OS=Homo sapiens]	0	8.765	1	2	16	2	1858	202.7	4.94	82	15.33	2	2	Pf00418, Pf08377	4133		MAP2	1.487	2.002	1.524	0.119835	0.0207448	0.0200292	94.58	105.62	85.91	459352	991374	2.3444e+06	1.47593e+06	1.138e+06	2.53687e+06	1.3205e+06		3.96804e+06	200527	844893	2.3108e+06	896406	525007	2.53687e+06	1.12708e+06		3.57003e+06	1
High	Master Protein	A0A024R442	aspartyl aminopeptidase, isoform CRA_b [OS=Homo sapiens]	0	67.135	24	8	67	8	471	52	7.42	824	70.46	8	8	Pf02127, Pf05343	23549		DNPEP	1.07	1.568	1.5	0.75013	0.062888	0.00872439	33.91	36.03	76.65	2.46738e+06	3.13523e+06	3.73425e+06	2.61251e+06	3.00789e+06	7.39393e+06	6.20831e+06	182383	4.66179e+06	1.07712e+06	2.67198e+06	3.68072e+06	1.58671e+06	1.38766e+06	7.39393e+06	5.29894e+06	101563	4194188	1
High	Master Protein	A0A024R458	HIV-1 Rev binding protein, isoform CRA_a [OS=Homo sapiens]	0	23.514	8	2	18	2	493	50.5	6.96	459	33.34	2	2	Pf01412	3267		AGFG1	1.55	1.767	1.069	0.0338079	0.0493431	0.363824	35.76	25.97	31.9	1.5103e+06	1.53093e+06	1.65279e+06	2.60651e+06	1.58395e+06	3.21232e+06	2.95436e+06	70028.8	2.93309e+06	659309	1.30472e+06	1.6291e+06	1.58306e+06	730742	3.21232e+06	2.52162e+06	38996.5	2.63888e+06	1
High	Master Protein	A0A024R462	fibronectin 1, isoform CRA_n [OS=Homo sapiens]	0	666.091	38	62	428	62	2355	259	5.73	5738	488.29	62	62	Pf00039, Pf00040, Pf00041	2335		FN1	0.504	0.749	1.495	0.000259087	0.76492	0.000423354	11.31	55.73	99.44	4.44207e+07	2.70466e+07	2.75946e+07	1.58318e+07	1.33009e+07	1.49285e+07	1.1087e+07	2.65805e+08	1.82188e+07	1.93915e+07	2.30503e+07	2.71991e+07	9.61545e+06	6.13622e+06	1.49285e+07	9.46303e+06	1.48017e+08	1.63914e+07	1	Oxidation [K1544]
High	Master Protein	A0A024R4A5	Trinucleotide repeat containing 15, isoform CRA_a [OS=Homo sapiens]	0	53.919	7	6	55	6	1298	149.9	5.54	869	72.84	6	5	Pf02213	26058		GIGYF2	1.252	0.984	0.857	0.259319	0.693063	0.910553	29.27	72.57	38.73	2.74536e+06	2.82443e+06	3.1477e+06	3.56115e+06	3.13667e+06	4.1941e+06	3.44022e+06	568710	4.20621e+06	1.19847e+06	2.4071e+06	3.10257e+06	2.16286e+06	1.44707e+06	4.1941e+06	2.93631e+06	316694	3.7843e+06	1
High	Master Protein	A0A024R4E5	high density lipoprotein binding protein (vigilin), isoform CRA_a [OS=Homo sapiens]	0	306.631	35	36	334	36	1268	141.4	6.87	4723	395.85	36	35	Pf00013, Pf13014, Pf14611	3069	ENSG00000115677.16	HDLBP	1.377	1.242	0.852	0.0627806	0.160536	0.756206	30.67	58.14	46.74	3.48374e+07	3.90298e+07	3.85178e+07	5.00282e+07	5.48564e+07	5.80643e+07	5.62883e+07	2.35585e+07	5.01315e+07	1.5208e+07	3.32629e+07	3.79657e+07	3.03846e+07	2.53075e+07	5.80643e+07	4.80434e+07	1.31189e+07	4.5103e+07	1
High	Master Protein	A0A024R4V7	Uncharacterized protein [OS=Homo sapiens]	0	28.305	9	3	32	3	453	50.7	5.88	459	33.39	3	3		55020		TTC38	0.908	1.524	1.888	0.596017	0.121702	0.000601942	40.69	30.97	42.89	1.23152e+06	2.02216e+06	2.49664e+06	1.4703e+06	1.33938e+06	2.47691e+06	3.26569e+06		2.61517e+06	537613	1.72338e+06	2.46085e+06	892984	617910	2.47691e+06	2.78734e+06		2.35285e+06	1
High	Master Protein	A0A024R4X0	NADH-cytochrome b5 reductase [OS=Homo sapiens]	0	213.377	58	14	293	14	291	33.2	7.58	3930	460.07	14	14	Pf00175, Pf00970, Pf08030	1727		CYB5R3	1.119	0.412	0.49	0.574139	0.0208958	0.00331549	52.35	16.35	24.61	7.61264e+07	8.37042e+07	6.895e+07	8.89508e+07	8.69133e+07	5.13211e+07	9.36659e+07	1.3586e+07	5.95525e+07	3.32324e+07	7.13365e+07	6.79617e+07	5.40243e+07	4.00966e+07	5.13211e+07	7.9946e+07	7.56557e+06	5.35791e+07	1
High	Master Protein	A0A024R4X1	Protein kinase C and casein kinase substrate in neurons 2, isoform CRA_a [OS=Homo sapiens]	0	62.522	23	10	72	10	435	50	6.43	700	81.19	10	10	Pf00611	11252		PACSIN2	0.95	0.86	0.903	0.841446	0.827037	0.588614	24.4	48.28	52.53	7.56757e+06	9.03271e+06	9.26316e+06	8.10832e+06	8.12658e+06	1.02585e+07	9.2079e+06	778398	9.49409e+06	3.30357e+06	7.69808e+06	9.13038e+06	4.92459e+06	3.74912e+06	1.02585e+07	7.85916e+06	433462	8.54178e+06	1
High	Master Protein	A0A024R4Z4	hCG2039447, isoform CRA_d [OS=Homo sapiens]	0	34.845	12	4	23	4	569	63.3	7.36	190	17.4	4	4	Pf13465	80829		ZFP91	1.557	1.441	0.797	0.0598753	0.208341	0.683906	34.82	52.83	49.95	717950	894738	1.11165e+06	1.85245e+06	1.42773e+06	2.70502e+06	1.64024e+06	599973	2.36059e+06	313416	762536	1.09571e+06	1.12508e+06	658669	2.70502e+06	1.39999e+06	334104	2.12381e+06	1
High	Master Protein	A0A024R509	Arylsulfatase A, isoform CRA_a [OS=Homo sapiens]	0	43.991	12	4	28	4	509	53.8	6.07	626	36.99	4	4	Pf00884, Pf01663, Pf14707	410		ARSA	0.799	0.993	1.024	0.289518	0.78721	0.541732	23.17	59.35	62.87	869523	1.31906e+06	1.15972e+06	806127	881413	1.8549e+06	1.49135e+06	36627.1	1.15866e+06	379584	1.12416e+06	1.14309e+06	489601	406632	1.8549e+06	1.2729e+06	20396.3	1.04244e+06	1
High	Master Protein	A0A024R511	von Willebrand factor C and EGF domains, isoform CRA_a [OS=Homo sapiens]	0.003	2.468	7	1	1	1	240	25.1	6.68	0		1		Pf12662, Pf14670	220001		VWCE		100	100		1e-17	1e-17											229691									127906		1
High	Master Protein	A0A024R555	MAP/microtubule affinity-regulating kinase 2, isoform CRA_a [OS=Homo sapiens]	0	8.672	4	2	4	1	551	61.6	9.51	38	2.3	2	2	Pf00069, Pf00627, Pf07714, Pf14531	2011		MARK2	1.197	0.979	0.853	0.584306	0.951051	0.799308	14.09	20.1	14.34	568416	488048	593289	615800	587013	710262	957836	525095	477931	248138	415936	584785	374006	270813	710262	817535	292407	429993	1
High	Master Protein	A0A024R570	multiple endocrine neoplasia I, isoform CRA_c [OS=Homo sapiens]	0	18.443	9	2	12	2	575	63.7	6.62	145	14.14	2	2	Pf05053	4221		MEN1	1.097	0.927	0.844	0.805065	0.982552	0.802264	22.25	23.49	19.27	806102	1.02338e+06	904915	1.2616e+06	736403	591794	696626	1.07959e+06	464455	351898	872170	891944	766232	339733	591794	594586	601186	417868	1
High	Master Protein	A0A024R571	EH domain-containing protein 1 [OS=Homo sapiens]	0	149.164	44	21	123	20	548	61.9	6.71	1064	131.93	20	21	Pf00350, Pf01926, Pf12763	10938	ENSG00000110047.17	EHD1	1.261	1.215	0.939	0.180112	0.1954	0.421483	41.51	79.08	62.9	8.56676e+06	1.31102e+07	1.32889e+07	1.35867e+07	1.32612e+07	1.51928e+07	1.99179e+07	4.59909e+06	1.48464e+07	3.73976e+06	1.11731e+07	1.30984e+07	8.25186e+06	6.11791e+06	1.51928e+07	1.70004e+07	2.56107e+06	1.33572e+07	1
High	Master Protein	A0A024R580	Calpain 1, (Mu/I) large subunit, isoform CRA_a [OS=Homo sapiens]	0	124.153	25	21	185	21	713	81.8	5.82	1572	155.28	21	21	Pf00648, Pf01067, Pf13833	823		CAPN1	1.286	1.143	0.827	0.211255	0.262252	0.869595	39.78	86.31	58.44	1.29501e+07	2.20822e+07	2.15511e+07	2.27878e+07	2.75818e+07	3.5891e+07	3.55045e+07	6.66477e+06	2.87129e+07	5.65325e+06	1.88194e+07	2.12421e+07	1.38401e+07	1.27246e+07	3.5891e+07	3.03039e+07	3.71137e+06	2.58329e+07	1
High	Master Protein	A0A024R5Q4	Glycine amidinotransferase (L-arginine:glycine amidinotransferase), isoform CRA_a [OS=Homo sapiens]	0	250.292	47	18	178	18	476	54.1	9.25	2366	243.5	18	18	Pf02274	2628		GATM	1.817	1.441	0.708	0.000993361	0.0603891	0.426032	44.31	139.95	70.27	2.3335e+07	1.15102e+07	1.07866e+07	2.09384e+07	2.7265e+07	2.5027e+07	1.06151e+08	1.1897e+06	1.21155e+07	1.01867e+07	9.8095e+06	1.0632e+07	1.27169e+07	1.25785e+07	2.5027e+07	9.06022e+07	662501	1.09003e+07	1
High	Master Protein	A0A024R6E8	galactosylceramidase, isoform CRA_c [OS=Homo sapiens]	0	52.029	14	7	68	7	685	77	6.64	870	80.53	7	7	Pf02057	2581		GALC	1.296	0.683	0.552	0.136556	0.591584	0.0338463	34.5	39.11	27.13	5.4028e+06	5.73309e+06	4.48753e+06	6.49599e+06	7.4624e+06	5.6494e+06	5.86547e+06	1.17683e+06	4.20447e+06	2.35855e+06	4.886e+06	4.4232e+06	3.94534e+06	3.44271e+06	5.6494e+06	5.00632e+06	655332	3.78274e+06	1
High	Master Protein	A0A024R6W0	aspartate aminotransferase [OS=Homo sapiens]	0	350.46	67	29	615	29	430	47.4	9.01	8472	921.11	29	29	Pf00226, Pf13355	2806		GOT2	0.929	0.738	0.796	0.548186	0.725077	0.926386	48.41	52.11	60.83	3.3401e+08	2.42486e+08	1.99567e+08	2.53298e+08	2.09247e+08	2.28018e+08	2.56319e+08	3.24515e+06	1.94581e+08	1.4581e+08	2.06657e+08	1.96706e+08	1.53841e+08	9.65344e+07	2.28018e+08	2.18775e+08	1.80711e+06	1.75064e+08	1	Oxidation [K430]
High	Master Protein	A0A024R798	choline transporter-like protein 2 isoform 2 [OS=Homo sapiens]	0	66.561	16	11	90	3	704	79.8	8.57	747	88.15	11	11	Pf04515	57153		SLC44A2	1.119	0.971	0.713	0.481935	0.517539	0.434097	48.19	67.26	39.08	1.41096e+07	1.35075e+07	9.37483e+06	1.32803e+07	1.68153e+07	9.58051e+06	1.2634e+07	192479	9.35658e+06	6.15945e+06	1.15117e+07	9.24045e+06	8.06581e+06	7.75758e+06	9.58051e+06	1.07834e+07	107185	8.41807e+06	1
High	Master Protein	A0A024R7K0	Splicing factor, arginine/serine-rich 14, isoform CRA_a [OS=Homo sapiens]	0	180.787	26	29	147	29	1082	120.2	7.28	1803	153.79	29	28	Pf01585, Pf01805, Pf12656	10147		SUGP2	1.308	1.607	1.201	0.107231	0.0255355	0.0310519	38.8	73.85	77.38	9.59389e+06	1.08398e+07	1.24326e+07	1.26209e+07	1.42926e+07	9.93941e+06	1.04174e+07	2.7441e+07	1.16139e+07	4.18814e+06	9.2382e+06	1.22544e+07	7.66532e+06	6.59377e+06	9.93941e+06	8.89151e+06	1.52809e+07	1.04489e+07	1
High	Master Protein	A0A024R7V7	Chromodomain helicase DNA binding protein 7, isoform CRA_a [OS=Homo sapiens]	0	59.414	5	13	53	6	3011	337.4	6.42	456	29.2	13	11	Pf00176, Pf00270, Pf00271, Pf00385, Pf07223, Pf07533, Pf09606, Pf09770	55636		CHD7	0.662	0.655	1.019	0.0154336	0.396207	0.517968	19.14	17.46	54.46	3.46023e+06	3.66207e+06	3.74427e+06	2.55542e+06	2.51615e+06	1.27303e+06	1.50582e+06	2.21749e+06	3.11206e+06	1.51054e+06	3.12098e+06	3.6906e+06	1.55203e+06	1.1608e+06	1.27303e+06	1.28525e+06	1.23484e+06	2.7999e+06	1
High	Master Protein	A0A024R837	haloacid dehalogenase-like hydrolase domain containing 3, isoform CRA_a [OS=Homo sapiens]	0	32.813	24	5	26	5	251	28.1	6.58	173	25.99	5	5	Pf00702, Pf13242, Pf13419	81932		HDHD3	1.587	2.229	1.237	0.0369733	0.00932532	0.135644	64.9	51.11	75.22	2.15825e+06	1.34438e+06	1.17444e+06	1.69146e+06	2.02152e+06	5.15816e+06	4.33513e+06		2.39213e+06	942167	1.14574e+06	1.1576e+06	1.02731e+06	932610	5.15816e+06	3700135		2.15219e+06	1
High	Master Protein	A0A024R850	Mitochondrial ribosome recycling factor, isoform CRA_a [OS=Homo sapiens]	0	17.409	19	4	20	4	336	36.9	9.58	207	24.46	4	4	Pf01765	92399		MRRF	1.029	0.592	0.7	0.991477	0.267502	0.379192	34.01	27.29	43.78	1.84605e+06	1.61162e+06	802417	1.60772e+06	1.89218e+06	643014	1.29466e+06	234503	901247	805881	1.37349e+06	790915	976450	872940	643014	1.10502e+06	130586	810848	1
High	Master Protein	A0A024R884	tenascin C (hexabrachion), isoform CRA_a [OS=Homo sapiens]	0	130.543	13	22	72	22	2201	240.8	4.92	785	56.22	22	21	Pf00041, Pf00147, Pf07974	3371		TNC	0.38	1.213	1.706	1.59895e-07	0.188936	0.00144262	8.07	92.02	100.91	2.06862e+06	7.66001e+06	9.66595e+06	1.97044e+06	2.29035e+06	1.66223e+06	1.64045e+06	1.81193e+07	3.55756e+06	903041	6.5282e+06	9.52739e+06	1.19675e+06	1.05663e+06	1.66223e+06	1.40017e+06	1.009e+07	3.20072e+06	1
High	Master Protein	A0A024R8D4	mitochondrial ribosomal protein S2, isoform CRA_a [OS=Homo sapiens]	0	34.336	27	8	89	8	319	35.5	8.94	299	58.94	8	8	Pf00318	51116		MRPS2	0.86	0.555	0.692	0.404115	0.216774	0.332555	34.23	17.17	31.24	1.03892e+07	7.81895e+06	7.43573e+06	8.09085e+06	1.08687e+07	6.42082e+06	7.05116e+06	3.50997e+06	6.6259e+06	4.53532e+06	6.66365e+06	7.32915e+06	4.91398e+06	5.01417e+06	6.42082e+06	6.01833e+06	1.95458e+06	5.96129e+06	1	Oxidation [P208]
Medium	Master Protein	A0A024R8P4	Chromosome 17 open reading frame 80, isoform CRA_a [OS=Homo sapiens]	0.017	1.15	2	1	3	1	609	67.2	9.16	0	0	1	1		55028		C17orf80	0.689	2.327	2.234	0.0990672	0.00539912	6.37937e-05	43.63	70.24	105.62	804795	1.51269e+06	1.47249e+06	1.01406e+06	395390	3584906	1.41432e+06		4.66067e+06	351328	1.28918e+06	1.45139e+06	615889	182410	3584906	1.20715e+06		4193186	1	Oxidation [P86]
High	Master Protein	A0A024R8V0	septin 9, isoform CRA_a [OS=Homo sapiens]	0	354.43	59	28	479	28	568	63.6	8.4	6597	705.68	28	27	Pf00735, Pf01926, Pf03193, Pf04548	10801		SEPT9	0.981	0.884	0.87	0.79425	0.798156	0.662692	44.88	56.96	59.11	5.7864e+07	8.03884e+07	9.3337e+07	7.22058e+07	6.5198e+07	9.68219e+07	8.26211e+07	1.59972e+07	7.50282e+07	2.52601e+07	6.85106e+07	9.19991e+07	4.38542e+07	3.00785e+07	9.68219e+07	7.0519e+07	8.9083e+06	6.75025e+07	1
High	Master Protein	A0A024R8X4	Uncharacterized protein [OS=Homo sapiens]	0	22.442	16	3	20	3	295	33	7.05	63	12.7	3	3	Pf13640	79701		OGFOD3	1.003	0.856	0.83	0.988331	0.897438	0.864323	33.99	32.06	36.25	1.6595e+06	1.654e+06	1.24501e+06	1.51018e+06	1.63213e+06	1.36692e+06	1.64262e+06	171143	992847	724442	1.40961e+06	1.22717e+06	917207	752966	1.36692e+06	1.40201e+06	95303.5	893259	1
High	Master Protein	A0A024R973	chromosome 1 open reading frame 27, isoform CRA_b [OS=Homo sapiens]	0	53.638	17	5	48	5	354	39.8	8.05	647	48.04	5	5	Pf14778	54953		C1orf27; ODR4	0.954	0.648	0.711	0.771048	0.38315	0.33756	22.16	25.95	33.49	3.09301e+06	3.32645e+06	2.43189e+06	2.7917e+06	2.95808e+06	1.57409e+06	2.23631e+06	706361	1.94627e+06	1.35023e+06	2.83495e+06	2.39703e+06	1.69554e+06	1.36468e+06	1.57409e+06	1.90874e+06	393347	1.75105e+06	1
High	Master Protein	A0A024R9K7	Chromosome 15 open reading frame 24, isoform CRA_b [OS=Homo sapiens]	0	18.771	13	3	29	3	320	35.4	9.6	109	33.68	3	3	Pf09430	56851		EMC7	1.068	0.885	0.896	0.870233	0.927557	0.936593	40.04	35.87	27.1	1.60419e+06	1.44857e+06	818052	1.31188e+06	1.85189e+06	709541	1.33014e+06	632230	801955	700298	1.23453e+06	806326	796770	854354	709541	1.1353e+06	352066	721515	1
High	Master Protein	A0A024R9Y3	HECT, UBA and WWE domain containing 1, isoform CRA_a [OS=Homo sapiens]	0	451.809	20	63	461	63	4359	479.9	5.21	4858	462.96	61	63	Pf00632, Pf02825, Pf06012, Pf06025, Pf14377	10075		HUWE1	1.08	0.879	0.866	0.730866	0.812838	0.66691	43.11	48.47	38.16	2.98054e+07	4.49398e+07	5.42265e+07	4.31839e+07	4.35548e+07	6.04116e+07	4.32957e+07	1.69091e+07	5.72736e+07	1.30113e+07	3.82997e+07	5.34492e+07	2.62277e+07	2.00936e+07	6.04116e+07	3.69539e+07	9.41605e+06	5.15287e+07	1
High	Master Protein	A0A024RA82	hCG37272, isoform CRA_b [OS=Homo sapiens]	0.001	3.597	2	1	2	1	528	58.8	7.81	24	0	1	1	Pf00093, Pf00094, Pf01826, Pf08742				0.01	1.072	100	1e-17	0.909982	1e-17		38.2		126687						135812	246678	100816	55304.5						115919	137366	90703.7	1
High	Master Protein	A0A024RAB6	Heparan sulfate proteoglycan 2 (Perlecan), isoform CRA_b [OS=Homo sapiens]	0	579.394	17	57	431	57	4346	463.7	6.51	5802	527.67	57	57	Pf00008, Pf00047, Pf00052, Pf00053, Pf00054, Pf00057, Pf02210, Pf07679, Pf07686, Pf12785, Pf13385, Pf13895, Pf13927	3339		HSPG2	1.933	2.022	0.976	0.000570045	0.00235123	0.257406	55.33	46.31	59.31	2.89799e+07	2.40046e+07	1.17964e+07	4.07852e+07	3.62553e+07	1.00593e+08	4.75571e+07	4.79869e+07	6.08122e+07	1.2651e+07	2.04577e+07	1.16273e+07	2.47709e+07	1.67261e+07	1.00593e+08	4.05911e+07	2.67222e+07	5.47125e+07	1
High	Master Protein	A0A024RAC6	Elongin-A [OS=Homo sapiens]	0	8.15	6	2	4	2	772	87.2	9.57	28	2.19	2	2	Pf06881, Pf08711	6924	ENSG00000011007.12	TCEB3; ELOA	0.84	0.83	0.928	0.478963	0.739709	0.949998	34.13	7.33	25.22	230433	246881	327355	275092	220733	119859	199698		210295	100594	210403	322663	167077	101833	119859	170447		189202	1
High	Master Protein	A0A024RAM4	microtubule-associated protein 1B, isoform CRA_b [OS=Homo sapiens]	0	437.008	27	44	391	44	2468	270.5	4.81	5378	490.42	44	44		4131		MAP1B	0.745	0.639	0.854	0.0381787	0.40313	0.731726	25.43	27.05	50.03	2.99575e+07	4.76866e+07	5.35277e+07	3.28431e+07	2.49458e+07	3.77534e+07	2.97146e+07	2.86771e+06	4.66901e+07	1.30778e+07	4.06406e+07	5.27604e+07	1.99472e+07	1.15085e+07	3.77534e+07	2.53621e+07	1.59692e+06	4.20068e+07	1
High	Master Protein	A0A024RAQ3	dihydrofolate reductase, isoform CRA_a [OS=Homo sapiens]	0	14.063	9	2	4	2	262	28.8	9.55	59	2.6	2	1	Pf00186	1719		DHFR	0.61	0.71	1.163	0.073829	0.510699	0.570328	14.66	20.89	41.49	431820	627641	865117	387297	382770	324672	320711	589731	445351	188508	534903	852716	235225	176588	324672	273735	328400	400680	1
High	Master Protein	A0A024RAU5	glycogen [starch] synthase [OS=Homo sapiens]	0	17.883	4	3	6	1	703	80.9	6.83	61	8.48	3	3	Pf00534, Pf05693	2998		GYS2	100	100	0.833	1e-17	1e-17	0.824953			2.21						973331		828410	793634						973331		461312	714029	1
Medium	Master Protein	A0A024RAV3	hCG1654716, isoform CRA_a [OS=Homo sapiens]	0.013	1.514	24	1	1	1	93	10.1	10.81	0		1						0.01	0.31	100	1e-17	0.0217816	1e-17		24.69		596455		42755.5				49495.6			260378		42142.6				42245.7			1	Oxidation [K42]
High	Master Protein	A0A024RB01	integrin, alpha 5 (fibronectin receptor, alpha polypeptide), isoform CRA_b [OS=Homo sapiens]	0	61.046	11	8	59	8	1098	119.2	6.06	852	82.04	8	8	Pf01839, Pf08441	3678		ITGA5	1.075	0.826	0.684	0.738911	0.926552	0.290499	40.49	34.07	14.21	5.17406e+06	4.89296e+06	2.6285e+06	5.11163e+06	5.07708e+06	3.77729e+06	3.77734e+06	305503	3.62032e+06	2.2587e+06	4.17e+06	2.59082e+06	3.10455e+06	2.34226e+06	3.77729e+06	3.22404e+06	170124	3.25719e+06	1
High	Master Protein	A0A024RB49	Tar (HIV-1) RNA binding protein 2, isoform CRA_b [OS=Homo sapiens]	0	12.308	14	2	4	2	222	24.1	6.96	65	2.13	2	2	Pf00035, Pf14709	6895		TARBP2	1.34	1.408	1.051	0.486832	0.452951	0.834034	32.37	65.68	65.68	143495	229452	174825	234183	191416	316374	246236	69122	355325	62641.6	195549	172319	142231	88308	316374	210168	38491.6	319684	1
High	Master Protein	A0A024RB62	tRNA (guanine-N(7)-)-methyltransferase [OS=Homo sapiens]	0.001	4.079	8	1	2	1	301	34.1	7.9	14	3.38	1	1	Pf02390, Pf12847	4234		METTL1	0.928	1.132	1.066	0.689246	0.722961	0.777387	63.02	71.65	78.19	257613		509737	258277	221496	1.93118e+06	360534	236050	1.80006e+06	112459		502430	156864	102185	1.93118e+06	307724	131448	1.61951e+06	1
High	Master Protein	A0A024RC24	Impact homolog (Mouse), isoform CRA_c [OS=Homo sapiens]	0	10.888	11	2	6	2	320	36.4	4.97	84	4.46	2	2	Pf01205, Pf05773	55364		IMPACT	0.887	1.093	1.259	0.634934	0.740907	0.371997	27	34.61	20.54	575760	510540	1.04043e+06	382803	533530	838303	688460	706362	741095	251344	435104	1.02552e+06	232495	246139	838303	587616	393348	666759	1
High	Master Protein	A0A024RC47	zinc finger protein 24 (KOX 17), isoform CRA_b [OS=Homo sapiens]	0	30.809	21	8	38	8	368	42.1	6.21	294	29.17	8	6	Pf00096, Pf02023, Pf13465	7572		ZNF24	1.177	0.814	0.718	0.356877	0.937572	0.401833	30.01	29.24	22.51	4.95087e+06	4.47117e+06	4.89993e+06	5.66467e+06	5.35904e+06	4.38578e+06	3.83024e+06	2.73812e+06	5.48442e+06	2.16127e+06	3.81053e+06	4.82969e+06	3.44044e+06	2.47234e+06	4.38578e+06	3.2692e+06	1.52476e+06	4.9343e+06	1
High	Master Protein	A0A024RCR6	BAG6 [OS=Homo sapiens]	0	45.037	9	7	52	7	1126	118.6	5.6	348	40.95	7	7	Pf00240, Pf11976, Pf12057, Pf13881	7917	ENSG00000227761.10; ENSG00000234651.10; ENSG00000228760.10	BAG6	0.983	0.985	1.068	0.935165	0.561299	0.311822	45.55	68.07	61.43	2.98751e+06	5.53219e+06	6.21956e+06	3.60947e+06	4.5062e+06	5.75213e+06	4.1212e+06	1.03587e+06	7.70253e+06	1.30418e+06	4.71478e+06	6.13041e+06	2.19221e+06	2.07889e+06	5.75213e+06	3.51754e+06	576840	6.92993e+06	1
High	Master Protein	A0A024RCT9	High mobility group AT-hook 1, isoform CRA_b [OS=Homo sapiens]	0	25.425	8	3	176	3	328	34.3	10.37	1839	196.39	3	3		3159		HMGA1	0.665	0.525	1.17	0.0194213	0.151235	0.076413	60.47	29.26	131.68	2.55742e+07	7.84254e+06	1.03607e+07	1.60215e+07	1.44753e+07	2.19236e+06	5.31531e+06	3.3748e+07	2.06448e+06	1.11642e+07	6.68376e+06	1.02122e+07	9.73069e+06	6.67802e+06	2.19236e+06	4.53674e+06	1.8793e+07	1.85741e+06	1
High	Master Protein	A0A024RCU9	SFRS protein kinase 1, isoform CRA_e [OS=Homo sapiens]	0	95.839	32	14	78	12	548	61.9	5.69	475	76.18	14	14	Pf00069, Pf07714	6732		SRPK1	1.049	0.633	0.691	0.748379	0.422231	0.334768	34.59	15.03	27.69	1.02093e+07	1.23219e+07	1.17528e+07	1.40387e+07	1.17949e+07	7.04415e+06	6.98994e+06	5.06512e+06	1.00523e+07	4.4568e+06	1.05013e+07	1.15844e+07	8.52642e+06	5.44147e+06	7.04415e+06	5.96607e+06	2.82059e+06	9.04398e+06	1	Oxidation [P375; P378; K379]
High	Master Protein	A0A024RD07	Trinucleotide repeat containing 5, isoform CRA_c [OS=Homo sapiens]	0	71.262	27	7	77	7	278	30.8	5.49	854	90.29	7	7	Pf11938	10695		CNPY3	0.818	0.812	0.721	0.265855	0.979604	0.452264	22.82	36.97	51.78	9.74978e+06	7.75693e+06	8.68536e+06	7.57485e+06	6.93861e+06	1.07595e+07	7.24568e+06	1.04937e+06	1.09334e+07	4.2562e+06	6.6108e+06	8.56086e+06	4.60058e+06	3.20106e+06	1.07595e+07	6.18435e+06	584354	9.83671e+06	1
High	Master Protein	A0A024RDL9	phosphoserine phosphatase, isoform CRA_b [OS=Homo sapiens]	0	11.693	13	3	18	3	252	28.1	7.37	67	20.42	3	3	Pf00702, Pf05822, Pf11019, Pf12710, Pf13419	5723		PSPH	0.707	0.824	1.084	0.100232	0.836679	0.357054	19.09	17.08	32.53	1.39174e+06	1.77292e+06	2.3861e+06	1.2996e+06	593460	1.54464e+06	1.53678e+06		1.56115e+06	607553	1.51096e+06	2.3519e+06	789310	273787	1.54464e+06	1.31168e+06		1.40456e+06	1
High	Master Protein	A0A024RDQ7	mitochondrial translational initiation factor 3, isoform CRA_a [OS=Homo sapiens]	0	15.782	8	2	20	2	278	31.7	9.69	126	19.51	2	2	Pf00707, Pf05198	219402		MTIF3	0.949	0.614	0.748	0.802678	0.31463	0.532484	21.39	20.05	32.12	1.75172e+06	1.25145e+06	1.16828e+06	1.40716e+06	1.1829e+06	1.27832e+06	1.25168e+06	588940	1.29758e+06	764700	1.06654e+06	1.15153e+06	854640	545718	1.27832e+06	1.06834e+06	327959	1.16743e+06	1
High	Master Protein	A0A059QFD5	Cytochrome c oxidase subunit 2 [OS=Homo sapiens]	0	13.14	11	2	14	1	227	25.6	4.84	102	21.08	1	2	Pf00116, Pf02790				1.456	0.396	0.336	0.178674	0.0363739	0.00050316	43.6	3.27	6.05	1.28767e+06	1.29917e+06	726349	966780	2.06973e+06		512558	440517		562123	1.10721e+06	715937	587174	954850		437480	245308		1
High	Master Protein	A0A059S1Y5	Cytochrome c oxidase subunit 1 (Fragment) OS=Homo sapiens GN=COX1 PE=3 SV=1	0.005	2.189	3	1	1	1	466	51.9	6.76	0		1		Pf00115				1.71	0.444	0.22	0.189612	0.109392	0.000331907	59.47	2.5	3.69	113714	171476	104747	140010	374959		50501.7			49641.2	146139	103245	85035.1	172984		43104.4			1	Oxidation [K288]
High	Master Protein	A0A075B6F9	nitric oxide synthase-interacting protein [OS=Homo sapiens]	0	45.365	28	4	28	4	304	33.4	8.72	239	39.62	4	4	Pf04564, Pf04641, Pf11789	51070	ENSG00000142546.13	NOSIP	1.032	0.887	0.849	0.910739	0.99065	0.945835	31.55	29.16	30.17	1.0339e+06	1.54104e+06	1.50631e+06	1.35916e+06	1.35956e+06	1.45509e+06	1.15101e+06	1.05776e+06	2.23227e+06	451343	1.31334e+06	1.48472e+06	825483	627220	1.45509e+06	982415	589026	2.00836e+06	1
High	Master Protein	A0A075B6Q3	BCL-6 corepressor-like protein 1 [OS=Homo sapiens]	0	4.602	1	1	2	1	1385	150.5	8.56	17	0	1	1	Pf00023, Pf12796, Pf13606, Pf13637, Pf13857	63035	ENSG00000085185.15	BCORL1	1.431	1.426	1.025	0.465418	0.513976	0.911452	22.82	61.45	60.25		83426.2	78214.8	115568	135910	92971.5	76015.4	174674			71099.5	77093.7	70190.1	62700.6	92971.5	64880.9	97269.5		1
High	Master Protein	A0A075B720	ubiquitin carboxyl-terminal hydrolase 8 [OS=Homo sapiens]	0.001	4.117	4	1	2	1	480	54.5	6.68	30	1.66	1	1	Pf00581, Pf08969		ENSG00000138592.13		0.995	1.189	1.111	0.84489	0.688615	0.719373	27.81	26.98	16.24	109336	192885	232425	228313	191962	183242	251830		205105	47729.8	164385	229094	138666	88559.7	183242	214943		184532	1
High	Master Protein	A0A075B738	Platelet endothelial cell adhesion molecule [OS=Homo sapiens]	0	19.231	4	3	10	3	738	82.5	6.99	124	11.21	3	3	Pf00047, Pf07679, Pf13895	5175	ENSG00000261371.5	PECAM1	100	100	1.404	1e-17	1e-17	0.0785792			51.51				733364	730427	836504	1.48577e+06		630030				445409	336976	836504	1.26814e+06		566835	1
High	Master Protein	A0A075B768	LisH domain and HEAT repeat-containing protein KIAA1468 [OS=Homo sapiens]	0	8.492	7	1	2	1	255	29.1	7.74	48	2.17	1	1			ENSG00000134444.13		0.899	1.24	1.38	0.589811	0.625841	0.357157	14.16	0	17.51			162559	129920	164448		201646					160229	78907	75866.6		172110			1
High	Master Protein	A0A075B793	GRIP1-associated protein 1 [OS=Homo sapiens]	0.001	3.814	2	1	2	1	810	92.7	5.17	15	0	1	1			ENSG00000068400.13																													1
Medium	Master Protein	A0A075B7B7	GAS2-like protein 2 [OS=Homo sapiens]	0.029	0.733	1	1	8	1	864	94.8	9.09	0		1		Pf00307, Pf02187		ENSG00000270765.5		1.391	0.464	0.334	0.0905216	0.0749503	2.02077e-05	50.56	20.23	12	2.25982e+06	2.68212e+06	2.1555e+06	3.14283e+06	4.21453e+06	1222381	3.06644e+06	384342	1.04875e+06	986508	2.28582e+06	2124606	1.9088e+06	1.94434e+06	1222381	2.61728e+06	214026	943560	1
High	Master Protein	A0A075B7F8	Nuclear envelope pore membrane protein POM 121C [OS=Homo sapiens]	0	23.582	7	5	26	5	1229	125	10.37	137	14.93	5	5	Pf15229		ENSG00000272391.5		0.712	0.844	1.128	0.120237	0.881583	0.256161	20.07	31.51	38.88	1.84901e+06	1.48681e+06	1.30859e+06	1.09372e+06	963924	1.10925e+06	1.41566e+06	1.03946e+06	1.82971e+06	807173	1.26712e+06	1.28983e+06	664271	444697	1.10925e+06	1.2083e+06	578837	1.64618e+06	1
High	Master Protein	A0A076MIL9	NADH-ubiquinone oxidoreductase chain 5 OS=Homo sapiens GN=ND5 PE=3 SV=1	0.001	3.595	3	1	1	1	603	67	9.03	35		1		Pf00361, Pf00662, Pf06455																															1
Medium	Master Protein	A0A087WSX6	CMT1A duplicated region transcript 1 protein [OS=Homo sapiens]	0.011	1.614	1	1	1	1	714	82	9.16	0		1		Pf00400	374286	ENSG00000241322.10	CDRT1		100	100		1e-17	1e-17											186427									103815		1
High	Master Protein	A0A087WT12	Glutathione peroxidase [OS=Homo sapiens]	0	78.263	40	9	52	9	233	26.9	10.07	539	63.7	9	9	Pf00255		ENSG00000167468.16		0.804	0.936	1.088	0.219446	0.619892	0.164445	26.84	55.72	63.01	8.225e+06	8.69025e+06	1.15537e+07	7.3037e+06	7.17511e+06	7.52855e+06	1.30106e+07	4.5214e+06	6.94428e+06	3.59057e+06	7.40621e+06	1.13881e+07	4.4359e+06	3.31017e+06	7.52855e+06	1.11049e+07	2.51781e+06	6.24774e+06	1
High	Master Protein	A0A087WT20	DDB1- and CUL4-associated factor 13 [OS=Homo sapiens]	0	38.631	18	9	18	9	597	67.5	9.29	165	11.18	9	9	Pf00400, Pf04158	25879	ENSG00000164934.13	DCAF13	1.556	4.607	2.272	0.254013	0.00117436	0.0147062	39.58	123.84	127.11		138543	349269	204598	497233	91111.5	247616	8.91838e+06	288679		118073	344263	124262	229394	91111.5	211346	4.96633e+06	259723	1
High	Master Protein	A0A087WT21	Cat eye syndrome critical region protein 2 [OS=Homo sapiens]	0.009	1.701	2	1	2	1	1442	159.6	7.05	0	0	1	1	Pf00439, Pf15614		ENSG00000099954.18		100	100	1.846	1e-17	1e-17	0.155142			0				63940.5				118063					38834.3				65745.3		1
High	Master Protein	A0A087WT67	Zinc finger protein 195 [OS=Homo sapiens]	0	4.505	3	2	8	1	633	72.6	8.09	32	0	2	2	Pf01352, Pf13465	7748	ENSG00000005801.16	ZNF195		100	100		1e-17	1e-17											153987									85749.6		1
High	Master Protein	A0A087WTA8	Collagen alpha-2(I) chain [OS=Homo sapiens]	0	198.365	33	22	139	22	1364	129.1	9.01	1379	108.95	21	18	Pf01391, Pf01410		ENSG00000164692.17		1.053	1.504	1.652	0.817178	0.0375143	0.000405955	47.87	78.28	100.33	5.26495e+06	4.68315e+06	3.60301e+06	4.07754e+06	2.53075e+06	1.05534e+07	3.04567e+06	4.73542e+07	8.27589e+06	2.29838e+06	3.99119e+06	3.55136e+06	2.4765e+06	1.16754e+06	1.05534e+07	2.59955e+06	2.63698e+07	7.44578e+06	1	Oxidation [P99; P100; P106; P108; P114; P118; P121; P126; P328; P439; P442; P447; P451; P454; P469; P475; P477; P480; P580; P582; P591; P592; P609; P612; P613; K619; P640; P676; P682; P699; P726; P733; K736; P781; P787; P795; P796; P798; P804; P805; P807; P808; P810; K813; P837; P838; P846; P861; P868; P874; P883; P892; P894; P900; P901; P949; P954; P961; P963; P966; K972; P1069]
High	Master Protein	A0A087WTB8	Ubiquitin carboxyl-terminal hydrolase [OS=Homo sapiens]	0	7.749	7	1	6	1	194	21.9	4.93	97	6.97	1	1	Pf01088	7347	ENSG00000118939.17	UCHL3	1.211	1.134	1.002	0.591289	0.720732	0.926029	88.56	36.23	99.79	125052	362760	339959	165784	151450	463254	310911	151762	411475	54590.7	309160	335086	100689	69870	463254	265369	84510.8	370202	1
High	Master Protein	A0A087WTD7	A-kinase anchor protein 13 [OS=Homo sapiens]	0	16.31	4	4	8	4	1429	161.1	7.09	88	4.91	4	4	Pf00130, Pf00169, Pf00621		ENSG00000170776.21		0.98	0.781	0.812	0.829925	0.654158	0.667389	17.98	31.22	33.61	827658	719830	1.14332e+06	938225	995466	766725	680326	207013	807165	361308	613471	1.12693e+06	569831	459249	766725	580674	115278	726203	1
High	Master Protein	A0A087WTF6	Neural cell adhesion molecule 1 [OS=Homo sapiens]	0	154.013	23	17	253	1	848	93.3	4.87	3340	267.92	17	17	Pf00041, Pf00047, Pf07654, Pf07679, Pf08205, Pf13895, Pf13927		ENSG00000149294.16																													1	Oxidation [P597; P599]
High	Master Protein	A0A087WTM1	Roundabout homolog 1 [OS=Homo sapiens]	0	25.272	4	5	24	3	1606	175.7	6.14	193	27.91	5	5	Pf00041, Pf00047, Pf07679, Pf07686, Pf13895, Pf13927		ENSG00000169855.19		1.043	0.99	0.875	0.857301	0.764272	0.977099	47.9	36.78	20.11	907475	1.54018e+06	1.9394e+06	1.22588e+06	1.39508e+06	1.62876e+06	1.54445e+06		1.56971e+06	396152	1.31261e+06	1.9116e+06	744541	643605	1.62876e+06	1.31823e+06		1.41226e+06	1
High	Master Protein	A0A087WU07	MICOS complex subunit Mic10 [OS=Homo sapiens]	0	4.48	13	1	8	1	62	7	7.28	47	3.83	1	1	Pf04418	440574	ENSG00000173436.13	MINOS1	1.814	1.104	0.596	0.00477582	0.532528	0.0712285	102.93	113.98	11.96	2.3164e+06	1.1541e+06	1.26122e+06	4.20223e+06	3.53553e+06	640129	2.5582e+06	294693	2.10641e+06	1.01121e+06	983577	1.24314e+06	2.55222e+06	1.63109e+06	640129	2183486	164104	1.89513e+06	1
High	Master Protein	A0A087WUC6	Signal peptidase complex subunit 2 [OS=Homo sapiens]	0	44.459	38	8	142	8	227	25.1	8.47	624	92.91	8	8	Pf06703		ENSG00000118363.11		0.887	0.388	0.531	0.399148	0.0118458	0.0231106	60.7	9.95	25.08	4.64664e+07	3.56648e+07	2.42219e+07	3.37587e+07	4.90709e+07	1.02398e+07	2.54633e+07	8.15719e+06	1.36517e+07	2.02846e+07	3.03951e+07	2.38747e+07	2.05033e+07	2.26384e+07	1.02398e+07	2.17335e+07	4.54245e+06	1.22823e+07	1
High	Master Protein	A0A087WUD1	Zinc finger protein 787 [OS=Homo sapiens]	0	66.763	26	7	65	7	382	40.4	7.96	590	65.77	7	7	Pf00096, Pf13465	126208	ENSG00000142409.5	ZNF787	1.211	1.228	1.096	0.295279	0.1807	0.0812706	29.31	53.95	55.35	1.13473e+07	1.30823e+07	1.45033e+07	1.58122e+07	1.45597e+07	1.32729e+07	1.60887e+07	2.69817e+06	2.45331e+07	4.9536e+06	1.11493e+07	1.42954e+07	9.60356e+06	6.717e+06	1.32729e+07	1.37321e+07	1.50251e+06	2.20723e+07	1
High	Master Protein	A0A087WUI8	Mannose-1-phosphate guanyltransferase alpha [OS=Homo sapiens]	0	5.867	4	1	2	1	399	43.6	7.17	40	2.67	1	1	Pf00132, Pf00483, Pf12804		ENSG00000144591.18		1.346	1.167	0.658	0.342758	0.551534	0.229691	60.39	36.67	41.37	370116	624498	778946	498034	508053	1.40457e+06	908905	327479	809999	161571	532225	767780	302481	234385	1.40457e+06	775772	182361	728752	1
Medium	Master Protein	A0A087WUK4	Nuclear receptor subfamily 2 group C member 1 [OS=Homo sapiens]	0.023	0.955	4	1	2	1	434	47.4	6.7	0	0	1	1	Pf00105		ENSG00000120798.16		1.71	0.822	0.481	0.0681762	0.690199	0.0463118	0	0	0	205121					350854	168651			89543.9					350854	143948			1
High	Master Protein	A0A087WUQ6	Glutathione peroxidase [OS=Homo sapiens]	0	78.667	51	8	139	8	202	21.9	6.55	1645	192.5	8	8	Pf00255		ENSG00000233276.3		0.972	0.975	0.78	0.902728	0.567253	0.806077	25.04	65.04	47.45	1.22763e+07	1.37802e+07	1.3407e+07	1.21831e+07	1.04767e+07	2.00814e+07	1.68041e+07	5.43915e+06	1.46898e+07	5.35913e+06	1.17441e+07	1.32149e+07	7.39943e+06	4.83331e+06	2.00814e+07	1.43427e+07	3.02887e+06	1.32164e+07	1
High	Master Protein	A0A087WUX8	MICOS complex subunit [OS=Homo sapiens]	0	27.354	18	3	22	3	263	28.7	9.6	261	25.08	3	3	Pf09769		ENSG00000155008.13		1.337	1.017	0.775	0.208045	0.750278	0.646614	29.26	69.99	41.37	1.56621e+06	1.44889e+06	999631	1.85455e+06	2.06516e+06	784823	2.0576e+06	132693	946764	683716	1.23481e+06	985302	1.12636e+06	952741	784823	1.75621e+06	73892.1	851799	1
Medium	Master Protein	A0A087WV07	Dynein heavy chain 10, axonemal [OS=Homo sapiens]	0.03	0.725	1	1	1	1	970	113.3	6.95	0		1		Pf08385		ENSG00000197653.15		0.01	0.114	100	1e-17	3.57249e-05	1e-17		0.84		100728		43410.5					7567.59		43972.1		42788.2					4214.12		1
High	Master Protein	A0A087WV34	Glycosylated lysosomal membrane protein [OS=Homo sapiens]	0	13.477	8	1	6	1	320	34.6	6.52	68	6.19	1	1	Pf15065	112770	ENSG00000198715.11	C1orf85; GLMP	0.909	0.969	1.015	0.689599	0.981018	0.878733	16.29	66.17	67.47	342192	394101	257435	352459	311095	261898	511696		185983	149382	335871	253745	214066	143521	261898	436744		167328	1
High	Master Protein	A0A087WVC6	Receptor-type tyrosine-protein phosphatase eta [OS=Homo sapiens]	0.004	2.307	1	1	2	1	1342	146.5	5.62	28	1.95	1	1	Pf00041, Pf00102, Pf00782, Pf13350, Pf14566		ENSG00000149177.12		100	100	3.463	1e-17	1e-17	9.45061e-08			0						348940	1.20824e+06								348940	1.03126e+06			1
High	Master Protein	A0A087WVD4	Arsenite methyltransferase [OS=Homo sapiens]	0	19.364	9	2	4	2	338	37.9	6.33	58	6.2	2	2	Pf01135, Pf01209, Pf08241, Pf08242, Pf12847, Pf13489, Pf13649, Pf13659, Pf13847		ENSG00000214435.7		0.591	0.75	1.22	0.0254917	0.633669	0.213618	21.42	39.55	75.04	1.12585e+06	1.36926e+06	1.85441e+06	1.04424e+06	472814	1.58506e+06	949146	814776	1.90203e+06	491483	1.16695e+06	1.82783e+06	634220	218128	1.58506e+06	810118	453719	1.71125e+06	1
High	Master Protein	A0A087WVM4	Monofunctional C1-tetrahydrofolate synthase, mitochondrial [OS=Homo sapiens]	0	53.182	14	10	41	9	913	99.2	7.27	294	29.46	10	10	Pf00763, Pf01268, Pf02882	25902	ENSG00000120254.15	MTHFD1L	0.779	0.709	0.95	0.184854	0.659031	0.655348	13.87	22.09	41.54	6.26871e+06	5.46551e+06	5.21526e+06	4.18734e+06	3.77271e+06	3.98759e+06	3.49283e+06	5.7938e+06	4.33724e+06	2.73656e+06	4.65795e+06	5.14051e+06	2.54318e+06	1.74051e+06	3.98759e+06	2.98121e+06	3.22636e+06	3.90219e+06	1
High	Master Protein	A0A087WVQ6	Clathrin heavy chain [OS=Homo sapiens]	0	1167.32	50	82	1617	82	1679	191.9	5.69	27768	2463.49	81	82	Pf00637, Pf01394, Pf04053, Pf09268, Pf13838	1213	ENSG00000141367.11	CLTC	0.985	0.698	0.755	0.817524	0.591326	0.687011	44.77	32.13	38.98	3.77493e+08	4.77611e+08	4.3996e+08	4.30642e+08	5.04481e+08	3.90492e+08	4.2394e+08	1.76991e+08	3.7118e+08	1.64792e+08	4.07041e+08	4.33653e+08	2.61551e+08	2.32738e+08	3.90492e+08	3.61843e+08	9.85602e+07	3.33949e+08	1
High	Master Protein	A0A087WVT8	Kielin/chordin-like protein [OS=Homo sapiens]	0	4.564	1	1	2	1	1628	173.5	5.88	0	0	1	1	Pf00093, Pf00094, Pf01826, Pf08742, Pf14828	375616	ENSG00000135253.13	KCP	100	100	1.232	1e-17	1e-17	0.487579			0				246704					303875				149836					273394	1
High	Master Protein	A0A087WVZ9	DNA-directed RNA polymerases I, II, and III subunit RPABC1 [OS=Homo sapiens]	0	27.46	24	4	64	4	184	21.4	7.44	227	47.08	3	4	Pf01191, Pf03871		ENSG00000099817.11		0.9	0.96	1.13	0.61145	0.535572	0.0620797	42.86	43.3	47.64	7.62793e+06	8.45721e+06	9.64079e+06	9.25589e+06	7.87656e+06	6.06359e+06	9.79122e+06	7.20319e+06	8.41906e+06	3.32992e+06	7.20761e+06	9.5026e+06	5.62156e+06	3.63378e+06	6.06359e+06	8.35703e+06	4.0112e+06	7.57458e+06	1	Acetyl [N-Term]
High	Master Protein	A0A087WW88	Charged multivesicular body protein 2b [OS=Homo sapiens]	0	7.715	10	2	12	2	179	20.4	9.09	46	7.76	2	2	Pf03357		ENSG00000083937.8		0.724	0.678	1.058	0.23919	0.447234	0.743989	19.89	26.08	55.76	633190	590267	748422	621941	397111	219750	435270	486088	633232	276415	503051	737693	377736	183204	219750	371513	270685	569715	1
High	Master Protein	A0A087WWD4	Neural cell adhesion molecule 1 [OS=Homo sapiens]	0	175.115	22	18	273	2	884	97.3	4.93	3440	289.13	18	18	Pf00041, Pf00047, Pf07654, Pf07679, Pf08205, Pf13895, Pf13927	4684	ENSG00000149294.16	NCAM1	0.612	0.215	0.345	0.00132851	6.95562e-06	9.06635e-07	21.82	3.79	13.78	1.15631e+08	8.88417e+07	6.46202e+07	6.24932e+07	6.50476e+07	1.72985e+07	1.91611e+07	1.74105e+06	2.84164e+07	5.0478e+07	7.57148e+07	6.36939e+07	3.79552e+07	3.00091e+07	1.72985e+07	1.63545e+07	969531	2.55661e+07	1
High	Master Protein	A0A087WWJ9	BRCA1-A complex subunit Abraxas 1 [OS=Homo sapiens]	0	4.863	6	1	4	1	220	25.2	7.8	67	2.06	1	1			ENSG00000163322.13		1.036	1.379	1.397	0.939404	0.480184	0.309289	31.2	17.92	27.49	157504	218305	199485	193049	163195	415739	252773		287821	68757.1	186049	196626	117248	75288.6	415739	215748		258951	1
High	Master Protein	A0A087WWP4	Putative RNA-binding protein 15 [OS=Homo sapiens]	0	58.868	15	11	86	9	933	102.1	9.94	398	61.89	11	11	Pf00076, Pf07744, Pf12737, Pf13893, Pf14259		ENSG00000162775.14		0.932	0.803	0.869	0.75566	0.998904	0.769411	25.3	28.08	29.78	1.11462e+07	8.5716e+06	8.71035e+06	9.04525e+06	8.75311e+06	7.62275e+06	7.98923e+06	5.8772e+06	8.57656e+06	4.86578e+06	7.3051e+06	8.58549e+06	5.49363e+06	4.03817e+06	7.62275e+06	6.81899e+06	3.2728e+06	7.71628e+06	1
High	Master Protein	A0A087WWV6	S-adenosyl-L-methionine-dependent tRNA 4-demethylwyosine synthase [OS=Homo sapiens]	0.002	2.59	4	1	2	1	471	54.2	5.41	0	0	1	1	Pf04055, Pf08608		ENSG00000277149.4		2.346	1.592	0.679	0.006642	0.33406	0.313225	41.27	42.87	14.32	214514	110567	144514	279001		467706	187571		320672	93644.7	94229.9	142443	169451		467706	160096		288507	1
High	Master Protein	A0A087WWZ6	PR domain-containing protein 11 [OS=Homo sapiens]	0.001	3.698	1	1	2	1	1177	134.2	5.96	25	0	1	1	Pf00856	56981	ENSG00000019485.13	PRDM11	0.824	0.609	0.79	0.437355	0.331136	0.551598	17.75	27.05	48.61		286856		278146	236481	112350	317210	174719	88790.7		244471		168932	109098	112350	270746	97294.7	79884.6	1
High	Master Protein	A0A087WX23	Retrotransposon-derived protein PEG10 [OS=Homo sapiens]	0	71.944	14	7	74	7	783	88.2	7.08	524	68.39	7	7	Pf03732, Pf06005, Pf08284, Pf13650, Pf13975, Pf14662, Pf15035		ENSG00000242265.5		0.929	0.74	0.799	0.642592	0.694673	0.677276	36.55	37.65	47.15	2.6264e+06	4.12726e+06	4.86845e+06	3.68691e+06	3.13001e+06	8.15108e+06	3.40652e+06	980882	6.9735e+06	1.14654e+06	3.51744e+06	4.79866e+06	2.23924e+06	1.444e+06	8.15108e+06	2.90754e+06	546218	6.27402e+06	1
High	Master Protein	A0A087WX80	Laminin subunit alpha-2 [OS=Homo sapiens]	0.003	2.518	0	1	2	1	3121	343.5	6.39	16	0	1	1	Pf00015, Pf00052, Pf00053, Pf00054, Pf00055, Pf00769, Pf01442, Pf01540, Pf01576, Pf01920, Pf02210, Pf02463, Pf03357, Pf04582, Pf04740, Pf04912, Pf05478, Pf05483, Pf05557, Pf05622, Pf05667, Pf05701, Pf06008, Pf06009, Pf06160, Pf07926, Pf08317, Pf10174, Pf10368, Pf12128, Pf12718, Pf12889, Pf13166, Pf13385, Pf13514, Pf13863, Pf13949, Pf14265, Pf15450		ENSG00000196569.11		0.601	0.797	1.327	0.045816	0.704599	0.201115	0	0.88	1.39		846060				508316	1.04248e+06	668161	674494		721050				508316	889784	372075	606839	1
High	Master Protein	A0A087WXB0	secretory carrier-associated membrane protein [OS=Homo sapiens]	0	45.366	24	4	30	4	312	35	7.96	367	46.9	4	4	Pf04144	9522	ENSG00000085365.17	SCAMP1	1.179	0.837	0.698	0.36461	0.946899	0.33261	30.39	30.23	24.4	7.55397e+06	7.05525e+06	4.20378e+06	9.36684e+06	8.41164e+06	3.4862e+06	7.86187e+06	67753.2	4.32962e+06	3.29763e+06	6.0128e+06	4.14353e+06	5.68895e+06	3.88063e+06	3.4862e+06	6.71029e+06	37729.3	3.89534e+06	1
High	Master Protein	A0A087WXS7	ATPase ASNA1 [OS=Homo sapiens]	0	97.326	40	10	152	10	331	37.1	5.14	1738	196.49	10	10	Pf02374		ENSG00000198356.11		1.025	0.815	0.724	0.851107	0.981502	0.463607	38.35	25.56	29.74	9.33901e+06	1.2356e+07	1.06857e+07	1.12093e+07	1.19491e+07	1.08834e+07	1.13038e+07	6.14995e+06	9.33699e+06	4.07688e+06	1.05303e+07	1.05325e+07	6.80799e+06	5.51262e+06	1.08834e+07	9.64807e+06	3.42469e+06	8.40044e+06	1
High	Master Protein	A0A087WXU5	nucleolar protein of 40 kDa [OS=Homo sapiens]	0.005	2.168	15	1	2	1	146	16.5	8.32	0	0	1	1	Pf00575	51538	ENSG00000121766.15	ZCCHC17	1.998	1.832	0.917	0.0772407	0.243858	0.901124	11.21	19.51	17.02	83990.4		98322.7	189354		174167	144442	191855		36665.4		96913.3	115004		174167	123284	106837		1
High	Master Protein	A0A087WXW9	Collagen alpha-1(V) chain [OS=Homo sapiens]	0	50.548	6	6	29	5	1838	183.5	5.07	249	13.14	6	4	Pf01391, Pf01410, Pf02210, Pf13385	1289	ENSG00000130635.15	COL5A1	1.182	1.188	0.944	0.454991	0.454221	0.734745	41.12	89.71	71.04	2.20432e+06	1.46744e+06	803094	2.0487e+06	1.27222e+06	2.23425e+06	1.03718e+06	5.65269e+06	1.41141e+06	962280	1.25062e+06	791582	1.24428e+06	586929	2.23425e+06	885258	3.14778e+06	1.26984e+06	1	Oxidation [K535; P870; P873; P876; P992; P993; P995; P996; P1017; P1019; P1020; P1022; P1023; P1029; K1034; P1431; K1433; P1434]
High	Master Protein	A0A087WY55	chromosome 6 open reading frame 55, isoform CRA_b [OS=Homo sapiens]	0	16.139	17	4	22	4	280	31.1	6.44	243	23.29	4	4	Pf04652	51534	ENSG00000009844.15	VTA1	0.986	1.184	1.099	0.903549	0.404766	0.329953	42.09	50.33	65.64	1.01621e+06	1.9907e+06	1.81756e+06	1.33088e+06	1.11062e+06	3.68598e+06	1.98681e+06	1.05604e+06	2.59343e+06	443618	1.69656e+06	1.79151e+06	808310	512373	3.68598e+06	1.69579e+06	588071	2.3333e+06	1
High	Master Protein	A0A087WYG2	C-Jun-amino-terminal kinase-interacting protein 3 [OS=Homo sapiens]	0	41.106	7	7	29	4	1337	147.5	5.4	257	20.46	7	7	Pf00038, Pf01576, Pf02463, Pf03938, Pf04111, Pf04156, Pf05701, Pf05769, Pf05887, Pf07174, Pf07926, Pf09728, Pf09731, Pf09744, Pf09756, Pf10037, Pf12037, Pf13851, Pf13863, Pf13868, Pf15035	23162	ENSG00000138834.12	MAPK8IP3	1.217	0.897	0.814	0.377131	0.953012	0.70518	45.65	59.56	40.88	623418	1.79838e+06	1.8852e+06	1.88002e+06	1.72657e+06	3.3803e+06	1.88997e+06	476380	3.20863e+06	272149	1.53266e+06	1.85818e+06	1.14183e+06	796537	3.3803e+06	1.61313e+06	265279	2.88679e+06	1
High	Master Protein	A0A087WYN9	ATP-dependent RNA helicase Dhx29 [OS=Homo sapiens]	0	49.963	7	7	37	7	1370	155.2	8.15	393	37.78	7	7	Pf00270, Pf00271, Pf04408, Pf07717		ENSG00000067248.9		1.05	1.107	1.027	0.877773	0.528693	0.512991	29.27	42.61	47.8	2.05806e+06	2.25125e+06	2.49031e+06	2.51033e+06	2.70143e+06	1.97006e+06	3.0362e+06	1.82404e+06	2.32016e+06	898433	1.91862e+06	2.45462e+06	1.52465e+06	1.24628e+06	1.97006e+06	2.59146e+06	1.01574e+06	2.08744e+06	1
High	Master Protein	A0A087WYR0	Signal recognition particle 19 kDa protein [OS=Homo sapiens]	0	11.938	11	2	10	2	120	13.6	10.23	53	6.98	2	2	Pf01922	6728	ENSG00000153037.13	SRP19	0.737	0.736	0.95	0.257393	0.565791	0.977278	14.3	11.97	23.74	508120	604091	583767	430251	193424	506656	429840	164757	481080	221816	514833	575399	261313	89234.6	506656	366879	91747.4	432825	1
High	Master Protein	A0A087WYT3	Prostaglandin E synthase 3 [OS=Homo sapiens]	0	90.998	35	7	154	7	164	19.1	4.55	1842	178.57	7	7	Pf04969	10728	ENSG00000110958.15	PTGES3	0.909	0.862	0.9	0.464181	0.862967	0.528385	28.05	33.84	35.08	5.0182e+07	5.922e+07	6.96712e+07	5.55155e+07	5.28405e+07	8.30457e+07	6.08007e+07	4.75116e+07	9.57803e+07	2.19066e+07	5.04699e+07	6.86725e+07	3.37173e+07	2.43775e+07	8.30457e+07	5.18948e+07	2.64575e+07	8.61731e+07	1
High	Master Protein	A0A087WYW7	Protein Hikeshi [OS=Homo sapiens]	0	13.493	20	3	12	3	131	14.4	9.19	73	9.25	3	3	Pf05603		ENSG00000149196.15		0.927	0.625	0.68	0.704356	0.310588	0.273562	31.48	27.45	32.82	1.50286e+06	1.91322e+06	3.03324e+06	1.13534e+06	1.21272e+06	1.71802e+06	1.99195e+06	637539	2.57033e+06	656065	1.63053e+06	2.98976e+06	689547	559476	1.71802e+06	1.70018e+06	355022	2.31251e+06	1
High	Master Protein	A0A087WZE9	High mobility group nucleosome-binding domain-containing protein 3 [OS=Homo sapiens]	0	19.864	27	2	42	2	130	13.9	9.91	97	36.19	2	2	Pf01101	9324	ENSG00000118418.14	HMGN3	1.311	1.714	2.424	0.306296	0.0307669	1.25329e-07	111.89	123.11	147.27	222869	4.37537e+06	75109.8	2.55769e+06	3.25181e+06	402910	8.23267e+06	2.27175e+07	37410.8	97291.7	3.72889e+06	74033.2	1.55341e+06	1.50019e+06	402910	7.02677e+06	1.26506e+07	33658.3	1
High	Master Protein	A0A087WZG6	Partitioning defective 3 homolog B [OS=Homo sapiens]	0	7.724	2	2	4	2	1030	112.8	8.7	42	2.46	2	2	Pf00595, Pf12053, Pf13180		ENSG00000116117.17		100	100	0.952	1e-17	1e-17	0.95885			62.98					141996	742298	711427		355680					65508.7	742298	607220		320004	1
High	Master Protein	A0A087WZK0	deoxyhypusine synthase [OS=Homo sapiens]	0	5.652	3	1	8	1	370	41.1	5.47	120	8.64	1	1	Pf01916		ENSG00000095059.15		1.142	1.478	1.227	0.690974	0.324723	0.432402	23.81	60.01	54.51	310951	485322	370446	388247	355128	616989	369708		891865	135744	413613	365136	235802	163835	616989	315554		802406	1
Medium	Master Protein	A0A087WZU1	Phosphatidylinositol phosphatase PTPRQ [OS=Homo sapiens]	0.012	1.545	0	1	3	1	2299	257.1	5.73	0	0	1	1	Pf00041, Pf00102, Pf13350	374462	ENSG00000139304.12	PTPRQ																												1	Oxidation [K1981; P1982]
High	Master Protein	A0A087X060	e2f-associated phosphoprotein [OS=Homo sapiens]	0	5.062	8	1	2	1	231	26.3	5.07	41	2.18	1	1	Pf10238		ENSG00000129518.8		0.989	1.496	1.538	0.83398	0.383084	0.187414	57.3	37.04	48.91		137558	261666	234862	107849	285101	202375		397965		117233	257916	142644	49755.2	285101	172732		358047	1
High	Master Protein	A0A087X0E3	Helicase SRCAP [OS=Homo sapiens]	0	8.335	1	2	26	1	1610	168.9	5.66	116	20	2	2	Pf00176		ENSG00000080603.16		1.038	1.022	0.984	0.902326	0.984638	0.982115	27.11	24.2	11.32	144039	114068	187723	159520	140254		135281	160036		62879.3	97213.5	185032	96884.5	64704.9		115466	89118.5		1
High	Master Protein	A0A087X0H9	RNA-binding protein 26 [OS=Homo sapiens]	0	71.681	11	10	92	1	1009	113.7	9.16	922	87.62	10	10	Pf00076, Pf00642, Pf01480, Pf13893, Pf14259	64062	ENSG00000139746.15	RBM26	1.047	0.827	0.789	0.926931	0.761296	0.565957	21.01	41.88	40.1	154073	308724	333758	349595	167338	300054	265089	74713.4	275892	67259.7	263108	328974	212326	77199.9	300054	226260	41605.2	248219	1
High	Master Protein	A0A087X0M4	kanadaptin [OS=Homo sapiens]	0	26.256	7	3	22	3	742	82.8	5.1	209	33.84	3	3	Pf00035, Pf00498		ENSG00000163798.13		1.307	1.396	0.927	0.312223	0.272806	0.829024	30.71	40.03	55.33	865891	973037	1.26098e+06	1.16548e+06	1.12406e+06	2.23445e+06	975722	371378	1.94666e+06	377999	829265	1.24291e+06	707853	518576	2.23445e+06	832802	206807	1.7514e+06	1
High	Master Protein	A0A087X0N3	Nucleolar protein 4-like [OS=Homo sapiens]	0	5.991	2	2	14	2	680	74.2	5.77	77	7.41	2	2		140688	ENSG00000197183.14	C20orf112; NOL4L	1.054	0.753	0.723	0.828244	0.639733	0.449108	24.24	60.94	55.23	1.40632e+06	1.26539e+06	1.57051e+06	1.48482e+06	1.36832e+06	2.28063e+06	1.06303e+06	292735	2.7737e+06	613917	1.07842e+06	1.54799e+06	901804	631262	2.28063e+06	907318	163014	2.49549e+06	1
High	Master Protein	A0A087X0R6	Sorting nexin-12 [OS=Homo sapiens]	0	11.756	23	4	16	3	172	19.8	7.78	124	18.01	4	4	Pf00787		ENSG00000147164.11		1.234	1.7	0.86	0.398038	0.0646588	0.938158	63.73	67.79	80.6	1.06731e+06	1.32659e+06	1.70539e+06	1.21342e+06	1.15932e+06	3.61642e+06	2.20295e+06	747092	3.09468e+06	465927	1.13058e+06	1.68094e+06	736969	534840	3.61642e+06	1.88027e+06	416029	2.78427e+06	1
High	Master Protein	A0A087X0S5	Collagen alpha-1(VI) chain [OS=Homo sapiens]	0	248.463	32	25	175	25	1026	108.3	5.43	1756	189.36	25	23	Pf00092, Pf01391, Pf13519		ENSG00000142156.14		1.476	2.591	1.538	0.0204527	0.000105758	0.000214759	51.26	85.61	93.07	1.26487e+07	1.38433e+07	6.6179e+06	1.72111e+07	1.64099e+07	3.89937e+07	2.93828e+07	7.76268e+07	2.03522e+07	5.52168e+06	1.17979e+07	6.52304e+06	1.04531e+07	7.57054e+06	3.89937e+07	2.50789e+07	4.32276e+07	1.83107e+07	1	Oxidation [P493; P502; P582; P583; P588; P589]
High	Master Protein	A0A087X0S7	Leucine-rich repeat-containing protein 41 [OS=Homo sapiens]	0	8.441	6	2	6	2	521	56.4	8.73	30	2.22	2	2			ENSG00000132128.16		0.994	1.363	2.149	0.859205	0.274981	0.000133628	70.67	40.8	61.15	169964	886674	965268	913375	470339	445371	1.91238e+06		992029	74196.8	755663	951431	554738	216986	445371	1.63226e+06		892524	1
High	Master Protein	A0A087X0W8	Transcription factor p65 [OS=Homo sapiens]	0	4.563	3	1	15	1	448	49.5	7.4	110	3.77	1	1	Pf00554	5970	ENSG00000173039.18	RELA	1.024	1.013	1.055	0.971131	0.901922	0.774042	35.65	42.95	25.37	240593	473932	431612	368590	275869	485262	458238		325135	105029	403906	425425	223863	127270	485262	391117		292522	1
High	Master Protein	A0A087X0Y5	Arf-GAP with SH3 domain, ANK repeat and PH domain-containing protein 3 [OS=Homo sapiens]	0.004	2.316	8	1	4	1	202	22.1	8.35	0	0	1	1			ENSG00000282854.1; ENSG00000088280.18		0.846	0.952	1.125	0.469307	0.934935	0.716191	12.97	19.46	6.35	128668	180409	147323	130046		119372			140179	56169.2	153753	145211	78983.3		119372			126118	1
High	Master Protein	A0A087X142	Septin-8 [OS=Homo sapiens]	0	104.09	33	11	142	4	426	49.3	6.2	1197	184.5	11	11	Pf00735		ENSG00000164402.13		2.781	2.509	0.949	4.63655e-07	0.00193545	0.627289	59.71	89.59	64.95	1.06188e+06	1.42472e+06	2.6137e+06	3.59459e+06	3.48254e+06	7.23441e+06	5.75373e+06	256203	4.52285e+06	463554	1.21421e+06	2.57623e+06	2.18317e+06	1.60664e+06	7.23441e+06	4.91095e+06	142670	4.06918e+06	1
Medium	Master Protein	A0A087X1H5	Arf-GAP with coiled-coil, ANK repeat and PH domain-containing protein 2 [OS=Homo sapiens]	0.03	0.707	1	1	11	1	777	88	6.9	0		1		Pf00023, Pf00169, Pf01412, Pf12796, Pf13637, Pf13857, Pf15413		ENSG00000114331.13		0.355	0.01	0.01	0.00138018	1e-17	1e-17	3.86			297089			129568		85986.6				129692			78693.4		85986.6				1
High	Master Protein	A0A087X211	Cell proliferation-regulating inhibitor of protein phosphatase 2A [OS=Homo sapiens]	0	23.792	3	2	8	2	906	102.2	6.23	187	9.71	2	2	Pf00769, Pf01576, Pf02463, Pf04111, Pf05103, Pf05483, Pf05557, Pf05667, Pf06637, Pf07111, Pf07888, Pf08317, Pf08614, Pf09730, Pf10174, Pf12072, Pf12128, Pf13166, Pf13476, Pf13868, Pf13870, Pf14257, Pf14943		ENSG00000163507.13		0.808	0.806	1.063	0.318094	0.714207	0.652193	20.19	37.06	48.33	957669	999552	1.46015e+06	933354	833850	962868	493460	890337	1.69975e+06	418064	851863	1.43922e+06	566872	384689	962868	421179	495797	1.52925e+06	1
High	Master Protein	A0A087X295	WD repeat-containing protein 6 [OS=Homo sapiens]	0	6.793	4	2	8	2	1151	124.9	6.92	48	2.29	2	2	Pf00400	11180	ENSG00000178252.17	WDR6	1.19	0.953	1.019	0.609918	0.993296	0.887188	23.25	44.67	49.19	307641	345527	325166	366104	359886		216952	384306		134299	294473	320505	222353	166030		185173	214006		1
High	Master Protein	A0A087X2D5	39S ribosomal protein L45, mitochondrial [OS=Homo sapiens]	0	62.749	41	9	101	9	306	35.3	9.03	421	92.2	9	9	Pf04280	84311	ENSG00000278845.4	MRPL45	1.204	0.72	0.628	0.25941	0.708029	0.139688	63.44	36.22	34.12	9.63559e+06	6.82892e+06	5.57178e+06	9.13659e+06	9.87909e+06	5.29407e+06	7.19457e+06	4.13614e+06	6.67461e+06	4.20635e+06	5.81991e+06	5.49191e+06	5.54911e+06	4.55763e+06	5.29407e+06	6.14073e+06	2.30327e+06	6.00511e+06	1
High	Master Protein	A0A087X2D8	C-jun-amino-terminal kinase-interacting protein 4 [OS=Homo sapiens]	0	25.675	8	7	25	4	1312	145.1	5.17	127	12.57	7	7	Pf09744		ENSG00000008294.20		1.375	2.121	1.091	0.292927	0.0665451	0.619052	24.49	45.51	29.54	286059	414385	478935	571206	446018	855373	633768		687011	124877	353157	472070	346922	205766	855373	540935		618100	1
High	Master Protein	A0A087X2I1	26S proteasome regulatory subunit 10B [OS=Homo sapiens]	0	244.089	66	23	270	23	403	45.8	7.78	3512	317	22	23	Pf00004, Pf00910, Pf01078, Pf05496, Pf07724, Pf07726, Pf07728, Pf13191, Pf13207, Pf13401	5706	ENSG00000100519.11	PSMC6	1.25	0.965	0.822	0.208954	0.581241	0.923157	47.64	65.22	41.6	3.28214e+07	4.68499e+07	5.93131e+07	4.66293e+07	4.60961e+07	6.59031e+07	5.38653e+07	2.33595e+07	5.69025e+07	1.43279e+07	3.99276e+07	5.84629e+07	2.83203e+07	2.1266e+07	6.59031e+07	4.59753e+07	1.30081e+07	5.11949e+07	1
High	Master Protein	A0A090N8G0	glycyl-tRNA synthetase [OS=Homo sapiens]	0	189.785	34	18	192	18	685	77.5	6.24	2146	241.78	18	18	Pf00458, Pf00587, Pf03129	2617		GARS	0.838	0.79	0.952	0.339205	0.915559	0.367641	37.84	33.04	49.18	1.35904e+07	1.63667e+07	1.9637e+07	1.34572e+07	1.24149e+07	1.96561e+07	1.6292e+07	1.02988e+07	1.87501e+07	5.93278e+06	1.39484e+07	1.93555e+07	8.17325e+06	5.72749e+06	1.96561e+07	1.39056e+07	5.73506e+06	1.68693e+07	1
High	Master Protein	A0A090N8G7	similar to RP9 protein [OS=Homo sapiens]	0.009	1.718	3	1	1	1	315	36.4	9.99	22		1						1.47	1.205	0.998	0.428377	0.751405	0.990799	34.33	36.42	29.52	51748.9	70053.4	64460.4	77867.9	76063.4	126811	62152.6	145996	77691.4	22590.6	59702.6	63536.4	47293.1	35091.1	126811	53048.7	81299.7	69898.6	1
High	Master Protein	A0A096LNX8	Scavenger receptor class F member 2 [OS=Homo sapiens]	0	8.813	2	1	16	1	871	92.3	8.32	78	12.27	1	1		91179	ENSG00000244486.8	SCARF2	1.245	1.464	1.18	0.59373	0.368251	0.568439	32.44	16.43	40.33	272993	256387	203863	265584	253873	559985	306282		389493	119173	218504	200941	161303	117122	559985	261419		350425	1
High	Master Protein	A0A096LPI6	Uncharacterized protein [OS=Homo sapiens]	0	204.025	60	12	196	11	279	30.5	7.87	1911	324.42	12	12	Pf01965, Pf04003		ENSG00000276612.3		0.999	0.82	0.852	0.908899	0.997933	0.732525	41.24	84.23	75.9	2.93286e+07	2.70698e+07	2.3047e+07	2.82964e+07	2.45777e+07	3.88074e+07	4.41981e+07	2.3403e+06	2.86005e+07	1.28032e+07	2.30701e+07	2.27166e+07	1.71858e+07	1.13387e+07	3.88074e+07	3.77241e+07	1.30323e+06	2.57317e+07	1
Medium	Master Protein	A0A0A0MQV6	fibroblast growth factor [OS=Homo sapiens]	0.015	1.333	3	1	1	1	288	30.7	11.18	0		1		Pf00167, Pf00340		ENSG00000138685.13			100	100		1e-17	1e-17											225537									125593		1
High	Master Protein	A0A0A0MQW0	Myelin expression factor 2 [OS=Homo sapiens]	0	111.844	35	18	94	1	576	61.9	8.75	945	102.36	17	17	Pf00076, Pf11608, Pf13893, Pf14259	50804	ENSG00000104177.17	MYEF2	2.407	2.067	1.001	0.0275401	0.15183	0.912966	9.28	10.1	29.73	78973.9	72714.9	77264.1	195879	185995	148704	269035	148840	159719	34475.5	61970.9	76156.5	118967	85807.1	148704	229628	82883.4	143698	1
High	Master Protein	A0A0A0MR02	Voltage-dependent anion-selective channel protein 2 [OS=Homo sapiens]	0	196.524	66	16	603	16	282	30.3	7.81	10515	795.35	16	16	Pf01459	7417	ENSG00000165637.13	VDAC2	0.992	0.888	0.877	0.850805	0.78628	0.630618	86.69	55.49	51.33	2.44867e+08	2.04969e+08	9.93918e+07	1.92433e+08	2.51978e+08	6.74909e+07	1.63462e+08	2.14797e+08	7.06679e+07	1.06895e+08	1.74684e+08	9.79671e+07	1.16874e+08	1.16248e+08	6.74909e+07	1.39519e+08	1.19613e+08	6.35795e+07	1
High	Master Protein	A0A0A0MR09	Tyrosine-protein phosphatase non-receptor type 9 [OS=Homo sapiens]	0	12	4	2	18	2	583	66.9	8.15	317	14.16	2	2	Pf00102, Pf00650, Pf03765, Pf13716, Pf14566		ENSG00000169410.9		1.021	0.796	0.955	0.992402	0.672776	0.959198	23.76	36.18	47.12	720124	614273	625774	528051	680191	715047	815665	304483	668333	314365	523510	616804	320712	313800	715047	696189	169555	601296	1
High	Master Protein	A0A0A0MR39	Myelin expression factor 2 [OS=Homo sapiens]	0	112.983	32	18	102	1	600	64.1	8.87	1022	114.29	17	17	Pf00076, Pf08777, Pf11608, Pf13893, Pf14259	50804	ENSG00000104177.17	MYEF2	2.323	2.847	1.166	8.06059e-07	4.60312e-05	0.0544216	47.6	52.39	50.4	5.56315e+06	5.08042e+06	6.53608e+06	1.5457e+07	1.58979e+07	2.47065e+07	2.11111e+07	1.75472e+07	2.24078e+07	2.42855e+06	4.32976e+06	6.44239e+06	9.38783e+06	7.33437e+06	2.47065e+07	1.80189e+07	9.77143e+06	2.01601e+07	1
High	Master Protein	A0A0A0MR59	pumilio homolog 2 [OS=Homo sapiens]	0	35.567	9	6	51	3	929	99.6	7.3	471	37.72	5	6	Pf00806	23369	ENSG00000055917.15	PUM2	1.271	1.04	0.768	0.289826	0.667692	0.538022	23.5	45.85	29.73	1.53787e+06	891109	1.48659e+06	1.91072e+06	1.54159e+06	2.0546e+06	3.66432e+06	1.10094e+06	1.75004e+06	671346	759442	1.46528e+06	1.16048e+06	711199	2.0546e+06	3.12758e+06	613076	1.5745e+06	1
High	Master Protein	A0A0A0MR66	RNA binding motif protein 10, isoform CRA_d [OS=Homo sapiens]	0	107.365	17	11	90	10	995	110.3	6.28	1144	122.28	11	11	Pf00076, Pf00641, Pf01585, Pf12656, Pf14259	8241	ENSG00000182872.15	RBM10	1.09	0.918	0.769	0.569784	0.659158	0.720319	43.58	58.5	35.52	9.57443e+06	7.91292e+06	9.8785e+06	9.4942e+06	7.96232e+06	1.36999e+07	8.24297e+06	3.7068e+06	1.29675e+07	4.17965e+06	6.74374e+06	9.7369e+06	5.7663e+06	3673340	1.36999e+07	7.03557e+06	2.06419e+06	1.16668e+07	1
High	Master Protein	A0A0A0MR74	Diacylglycerol O-acyltransferase 1 [OS=Homo sapiens]	0	12.714	5	1	10	1	315	33.5	9.33	268	9.84	1	1			ENSG00000185000.11	LOC642255	1.254	0.938	0.673	0.606829	0.935647	0.326873	21.77	6.86	8.91	177691	246067	187032	228582	297885		175527			77569.8	209709	184351	138829	137427		149817			1
High	Master Protein	A0A0A0MRF6	A-kinase anchor protein 9 [OS=Homo sapiens]	0	10.909	1	4	15	4	3910	453.2	4.98	49	0	4	3	Pf10186, Pf10495		ENSG00000127914.16		1.548	1.513	0.836	0.212139	0.365765	0.683142	53.73	39.24	36.05	223463	245142	128707	324540	521713	756217	306790	362709	626530	97551.2	208921	126862	197109	240688	756217	261853	201979	563686	1
High	Master Protein	A0A0A0MRH7	Paired box protein Pax-2 [OS=Homo sapiens]	0	57.674	23	6	55	5	393	42.2	7.9	564	50.28	6	6	Pf00046, Pf00292, Pf12403, Pf13384, Pf13551		ENSG00000075891.21		1.146	0.511	0.512	0.467934	0.123182	0.00885289	65.07	17.02	15.35	6.80834e+06	4.65257e+06	2.00504e+06	6.69381e+06	4.51007e+06	2.98695e+06	2.17291e+06	1.99999e+06	3.66091e+06	2.97213e+06	3.96513e+06	1.97629e+06	4065486	2.08068e+06	2.98695e+06	1.85463e+06	1.11372e+06	3.2937e+06	1
High	Master Protein	A0A0A0MRI1	GPALPP motifs-containing protein 1 [OS=Homo sapiens]	0	4.664	4	1	2	1	338	37.9	5.41	21	1.7	1	1	Pf12572	55425	ENSG00000133114.17	GPALPP1; KIAA1704	1.017	1.085	1.178	0.989141	0.78239	0.515035	30.93	29.99	20.26	267143	419361	405959	445967	337591	271743	356916		447479	116619	357398	400140	270858	155745	271743	304636		402595	1
Medium	Master Protein	A0A0A0MRJ3	neuron navigator 1 [OS=Homo sapiens]	0.015	1.425	1	1	2	1	1830	197.3	8.22	17		1		Pf00910, Pf02562, Pf12325, Pf13191, Pf13207, Pf13521	89796	ENSG00000134369.15	NAV1	0.944	0.806	0.853	0.786891	0.777233	0.952118	78.84	69.59	77.85	3.84061e+06	1.29596e+06	967040	1.4635e+06	3.60235e+06	913104	857992	6.76622e+06	779290	1.67659e+06	1.10447e+06	953178	888856	1.66191e+06	913104	732316	3767867	701123	1	Oxidation [K1787; P1791]
High	Master Protein	A0A0A0MRK6	metaxin 1, isoform CRA_b [OS=Homo sapiens]	0	36.532	20	6	36	6	466	51.4	9.79	445	27.52	6	6	Pf10568, Pf11801, Pf14497	4580	ENSG00000173171.14	MTX1	1.139	0.838	0.839	0.550394	0.916446	0.807715	25.52	75.62	60.52	3.25222e+06	4.19666e+06	2.92334e+06	3.89462e+06	3.48713e+06	1.43488e+06	2.67406e+06	568957	2.11242e+06	1.41974e+06	3.57658e+06	2.88143e+06	2.36539e+06	1.60876e+06	1.43488e+06	2.28237e+06	316832	1.90054e+06	1
High	Master Protein	A0A0A0MRL6	Actin-binding LIM protein 1 [OS=Homo sapiens]	0	8.753	4	2	4	2	746	84.3	8.37	60	2.71	2	2	Pf00412, Pf02209		ENSG00000099204.18		1.798	2.432	1.359	0.129237	0.06056	0.334589	27.71	12.69	31.82	101310	121563		346205	199486	334831	523505		253037	44226.3	103602		210268	92030.9	334831	446823		227656	1
High	Master Protein	A0A0A0MRM9	nucleolar and coiled-body phosphoprotein 1 [OS=Homo sapiens]	0	14.745	6	4	38	4	708	74.6	9.47	54	30.76	4	4	Pf05022		ENSG00000166197.16		0.989	0.674	0.798	0.871145	0.468848	0.635971	57.07	24.75	38.49	5.07383e+06	3.38919e+06	4.46816e+06	2.51921e+06	2.03152e+06	5.01783e+06	2.61257e+06	1.39967e+06	2.88934e+06	2.21494e+06	2.88842e+06	4.40411e+06	1.53004e+06	937225	5.01783e+06	2.22989e+06	779426	2.59953e+06	1
High	Master Protein	A0A0A0MRQ4	Vascular endothelial growth factor A [OS=Homo sapiens]	0	4.686	6	1	2	1	327	35.6	7.44	0	0	1	1	Pf00341		ENSG00000112715.21		100	100	0.429	1e-17	1e-17	0.0148103			0						617968			264940						617968			238365	1
High	Master Protein	A0A0A0MRS1	zinc finger protein 33A [OS=Homo sapiens]	0.004	2.345	2	1	2	1	699	81.1	8.34	0	0	1	1	Pf13465	7581	ENSG00000189180.15	ZNF33A	1.157	0.86	0.696	0.665422	0.819983	0.34567	23.54	23.68	18.11	701945	585724	686544	785568	677915	1.2206e+06	590695	463263	849281	306429	499180	676703	477114	312750	1.2206e+06	504172	257975	764094	1
High	Master Protein	A0A0A0MRS4	transmembrane protein 38B, isoform CRA_b [OS=Homo sapiens]	0	14.242	9	1	6	1	237	26.4	9.1	46	3.96	1	1	Pf05197	55151	ENSG00000095209.11	TMEM38B	1.413	1.252	0.906	0.262569	0.549946	0.942984	47.71	42.08	4.2	575227	411914	281815	812647	568356	551127	524680		507268	251111	351052	277775	493561	262206	551127	447826		456386	1
High	Master Protein	A0A0A0MRY0	TBC1 domain family member 22A [OS=Homo sapiens]	0	11.743	10	2	6	2	487	55.8	5.38	69	4.35	2	2	Pf00566	25771	ENSG00000054611.13	TBC1D22A	1.08	2.092	1.936	0.979666	0.115727	0.0445386	61.54	0.8	73.42			154808	167240	97823.8	331331	322077		325573			152588	101573	45130.1	331331	274900		292916	1
High	Master Protein	A0A0A0MS54	cAMP-dependent protein kinase catalytic subunit beta [OS=Homo sapiens]	0	51.13	25	10	108	2	357	41.3	8.56	515	75.21	10	10	Pf00069, Pf07714, Pf14531		ENSG00000142875.19		1.009	0.77	0.832	0.981363	0.680772	0.87423	19.66	32.67	35.38	1.31591e+06	1.3094e+06	1.45591e+06	1.45276e+06	1.2744e+06	1.24032e+06	1.44295e+06	510710	1.05757e+06	574453	1.11593e+06	1.43504e+06	882334	587932	1.24032e+06	1.23159e+06	284396	951491	1
Medium	Master Protein	A0A0A0MS70	Myeloid differentiation primary response protein MyD88 [OS=Homo sapiens]	0.011	1.603	2	1	2	1	309	34.6	6.16	14	0	1	1	Pf00531, Pf01582, Pf13676	4615	ENSG00000172936.12	MYD88	0.853	1.117	1.399	0.511279	0.819388	0.414623	16.69	27.17	19.79	120635	142739	198833	102853	109357	172216	132604	159389	241000	52662.6	121649	195983	62468	50450.7	172216	113181	88758.2	216826	1
High	Master Protein	A0A0A0MS88	Collagen and calcium-binding EGF domain-containing protein 1 [OS=Homo sapiens]	0.002	2.607	3	1	2	1	336	36.5	7.62	24	1.68	1	1	Pf07645, Pf12662, Pf12947, Pf14670		ENSG00000183287.13		1.517	0.726	0.479	0.34006	0.517019	0.0799569	15.62	0	4	155549			211061	235909	306569			112935	67903.8			128188	108835	306569			101607	1
Medium	Master Protein	A0A0A0MSA0	Laminin subunit alpha-3 [OS=Homo sapiens]	0.028	0.795	0	1	1	1	3277	360	7.24	0		1		Pf00052, Pf00053, Pf00054, Pf00055, Pf01576, Pf02210, Pf03938, Pf05483, Pf05557, Pf06008, Pf06009, Pf06873, Pf07926, Pf09731, Pf10174, Pf11985, Pf12128, Pf12795, Pf13385, Pf13851, Pf14643, Pf15450	3909	ENSG00000053747.15	LAMA3																												1
High	Master Protein	A0A0A0MSC8	Slit homolog 3 protein [OS=Homo sapiens]	0	5.894	2	2	4	2	1393	153.7	7.39	24	0	2	2	Pf00008, Pf00054, Pf01462, Pf02210, Pf12799, Pf12947, Pf13306, Pf13385, Pf13855		ENSG00000184347.14		0.854	0.843	0.841	0.509144	0.769706	0.717136	30.42	33.58	28.34	441826	305149	158012	250052	113757	119690	193890	376118	143258	192876	260062	155747	151869	52480.8	119690	165489	209447	128889	1
High	Master Protein	A0A0A0MSE7	RPA-interacting protein [OS=Homo sapiens]	0	11.602	11	1	12	1	231	26.2	4.97	65	5.86	1	1	Pf14766, Pf14767, Pf14768	84268	ENSG00000129197.14	RPAIN	1.226	1.23	0.975	0.512625	0.590725	0.963801	37	29.06	36.14	229600	317618	324505	389516	211299	479235	364041	282479	467348	100230	270688	319853	236572	97480.7	479235	310718	157302	420471	1
High	Master Protein	A0A0A0MSI8	Exocyst complex component 5 [OS=Homo sapiens]	0	20.732	8	4	9	4	711	82.1	6.87	86	5.42	3	4	Pf03938, Pf07393		ENSG00000070367.15		1.52	1.296	0.74	0.154015	0.363447	0.511734	30.59	62.42	19.21	659889	691840	924021	1.10838e+06	1.00769e+06	1.43665e+06	1.15884e+06	593932	1.27726e+06	288070	589617	910776	673176	464889	1.43665e+06	989094	330740	1.14915e+06	1
High	Master Protein	A0A0A0MSJ9	ras GTPase-activating protein 2 [OS=Homo sapiens]	0.001	3.168	1	1	6	1	853	96.9	7.2	21	0	1	1	Pf00168, Pf00169, Pf00616, Pf00779		ENSG00000155903.11		1.162	0.527	0.537	0.855175	0.213119	0.134979	53.36	9.99	20.75	93266.7	105076	121419	122139	78182	200513	55399.6	41976.6	169378	40714.9	89550.4	119679	74180.8	36068.5	200513	47284.9	23375.3	152389	1
High	Master Protein	A0A0A0MSK5	Torsin-1A-interacting protein 1 [OS=Homo sapiens]	0	115.965	39	11	117	1	462	52.4	7.06	1649	146.33	11	11	Pf05609		ENSG00000143337.18		1.049	1.136	1.114	0.928182	0.610681	0.509978	13.56	34.17	16.87	745548	650182	544007	682177	622962	736633	846625	186785	760119	325464	554114	536209	414320	287398	736633	722614	104014	683876	1
Medium	Master Protein	A0A0A0MSS3	SLAIN motif-containing protein 1 [OS=Homo sapiens]	0.016	1.207	2	1	1	1	590	62.2	7.64	0		1		Pf15301	122060	ENSG00000139737.21	SLAIN1	1.044	0.854	0.775	0.999961	0.784113	0.525079	65.41	19.72	26.57	294780	358271	203656	307885	443724	169207	277397		205309	128684	305335	200737	186994	204708	169207	236765		184715	1	Oxidation [K41]
High	Master Protein	A0A0A0MSS8	Aldo-keto reductase family 1 member C3 [OS=Homo sapiens]	0	64.644	32	8	28	5	323	36.8	7.94	234	37.62	8	8	Pf00248	8644	ENSG00000196139.13	AKR1C3	0.985	1.16	1.233	0.888806	0.443461	0.144094	47.69	83.16	96.73	1.43463e+06	2.03993e+06	2.40862e+06	1.50533e+06	1.89791e+06	3.94787e+06	1.82162e+07	1.70715e+06	1.93126e+06	626278	1.73852e+06	2.3741e+06	914265	875582	3.94787e+06	1.5548e+07	950652	1.73754e+06	1
High	Master Protein	A0A0A0MSU2	ELM2 and SANT domain-containing protein 1 [OS=Homo sapiens]	0.002	2.844	1	1	2	1	1018	111.8	9.07	23	0	1	1	Pf00249, Pf01448		ENSG00000156030.13		0.652	1.222	1.776	0.143009	0.676084	0.127976	3.01	9.59	21	143384	150889	150586	134050	96059.1	93476.1	192058		168245	62593.1	128594	148428	81415.2	44316	93476.1	163926		151370	1
High	Master Protein	A0A0A0MT58	transcription elongation factor A protein 2 [OS=Homo sapiens]	0	21.066	10	2	28	1	270	30.3	9.06	640	37.93	2	2	Pf01096, Pf07500, Pf08711	6919	ENSG00000171703.16	TCEA2	1.505	1.201	0.798	0.237059	0.673196	0.585824	8.14	50.86	32.37	199120	226076	192393	295069	299714	321613	239107	43430.5	321128	86924.2	192672	189635	179210	138270	321613	204084	24184.9	288917	1
High	Master Protein	A0A0A0MT60	peptidylprolyl isomerase [OS=Homo sapiens]	0	18.759	3	3	16	3	1244	136.2	5.21	204	9.62	3	3	Pf00038, Pf00254, Pf00769, Pf01442, Pf01496, Pf01576, Pf01875, Pf02463, Pf03938, Pf03961, Pf03962, Pf04111, Pf04156, Pf04849, Pf05029, Pf05483, Pf05557, Pf05622, Pf05667, Pf05701, Pf05911, Pf06160, Pf06248, Pf07111, Pf07200, Pf07888, Pf07926, Pf08317, Pf08614, Pf08703, Pf09726, Pf09728, Pf09730, Pf09731, Pf09744, Pf09755, Pf09789, Pf10174, Pf10186, Pf10211, Pf10234, Pf10498, Pf11559, Pf12128, Pf1…	23307	ENSG00000119321.8	FKBP15	0.845	1.704	1.723	0.512278	0.181127	0.0959869	27.53	37.65	49.97	390042	594514	591280	427441	486984	386981	904736		263213	170270	506671	582804	259606	224666	386981	772213		236812	1
High	Master Protein	A0A0A0MTB8	WD repeat-containing protein 36 [OS=Homo sapiens]	0	86.775	27	16	35	16	895	99.3	7.36	289	26.63	16	15	Pf00400, Pf04192		ENSG00000134987.11		0.881	0.865	1.14	0.412346	0.97815	0.256225	19.02	51.93	75.35	3.80464e+06	3.72385e+06	4.46217e+06	3.13064e+06	2.65989e+06	1.99622e+06	1.46705e+06	1.17657e+07	1.62812e+06	1.66089e+06	3.17363e+06	4.39821e+06	1.9014e+06	1.22712e+06	1.99622e+06	1.25216e+06	6.55189e+06	1.46481e+06	1
High	Master Protein	A0A0A0MTC1	E3 ubiquitin-protein ligase RNF213 [OS=Homo sapiens]	0.002	2.917	0	1	2	1	5256	596.1	6.42	15	0	1	1	Pf00097, Pf13639, Pf13920, Pf13923, Pf15227	57674	ENSG00000173821.19	RNF213	1.403	0.958	0.622	0.471375	0.916582	0.272473	21.42	54.25	21.57	93467	109247	116215	145318	131143	196300	153647	64913		40802.4	93105.1	114549	88259	60501.8	196300	131141	36147.7		1
High	Master Protein	A0A0A0MTF4	Homeobox protein Hox-D8 [OS=Homo sapiens]	0	6.653	11	2	9	1	186	21.6	8.91	36	5.13	2	2	Pf00046	3234	ENSG00000175879.8	HOXD8	5.204	7.127	1.349	3.33869e-06	4.60853e-05	0.31445	37.01	35.57	42.07		79369.5	48776.7	328786	228322	459180	454381		432743		67642.2	48077.5	199688	105334	459180	387825		389336	1
High	Master Protein	A0A0A0MTH3	Integrin-linked protein kinase [OS=Homo sapiens]	0	86.167	34	15	124	15	483	54.6	7.97	1144	136.78	15	15	Pf00023, Pf00069, Pf07714, Pf12796, Pf13606, Pf13637, Pf13857		ENSG00000166333.13		1.068	1.14	0.942	0.679364	0.275381	0.409529	39.98	63.43	51.63	9.90849e+06	1.24417e+07	1.40112e+07	1.30457e+07	1.26882e+07	1.95036e+07	1.67902e+07	7.30665e+06	1.87524e+07	4.32548e+06	1.06034e+07	1.38104e+07	7.92331e+06	5.8536e+06	1.95036e+07	1.43309e+07	4.06881e+06	1.68715e+07	1
High	Master Protein	A0A0A0MTH9	TATA-binding protein-associated factor 172 [OS=Homo sapiens]	0	17.291	3	5	12	5	1849	206.8	6.52	62	8.06	5	4	Pf00176, Pf00271, Pf12054		ENSG00000095564.13		0.851	1.07	1.278	0.449139	0.678844	0.254072	27.04	43.15	37.99	878463	1.14971e+06	1.26735e+06	733963	966893	915845	1.08056e+06	1.08325e+06	739642	383487	979836	1.24918e+06	445773	446067	915845	922281	603225	665452	1
High	Master Protein	A0A0A0MTL6	RHO family-interacting cell polarization regulator 1 [OS=Homo sapiens]	0	10.084	2	2	8	2	1238	134	6.43	37	5.11	2	2	Pf13646	79567	ENSG00000039523.19	FAM65A; RIPOR1	1.367	1.697	1.029	0.34699	0.230525	0.847549	47.4	53.09	86.03	352389	391597	439721	404636	420550	916671	898813	380525	309560	153833	333736	433418	245755	194017	916671	767158	211901	278510	1
High	Master Protein	A0A0A0MTP6	Phosphatidylinositol 3,4,5-trisphosphate 5-phosphatase 2 [OS=Homo sapiens]	0	44.203	9	7	23	7	1146	126.4	8.92	376	17.72	6	7	Pf03372		ENSG00000165458.13		1.286	1.511	1.309	0.258754	0.135298	0.0859485	37.58	56.16	63.14	687517	1.53764e+06	1.82944e+06	1.63072e+06	1.75657e+06	3.02597e+06	2.67291e+06	305120	2.51523e+06	300131	1.31045e+06	1.80322e+06	990417	810375	3.02597e+06	2.28139e+06	169910	2.26294e+06	1
High	Master Protein	A0A0A0MTQ5	Chromosome 14 open reading frame 2 [OS=Homo sapiens]	0	16.093	25	2	38	2	77	9.1	9.99	164	30.22	2	2	Pf08039	9556	ENSG00000156411.9	C14orf2	0.924	0.535	0.661	0.657323	0.170449	0.225914	40.87	24.17	30.06	1.02246e+07	1.1855e+07	9.18848e+06	1.01884e+07	1.29639e+07	5.64283e+06	8.65698e+06	1.96547e+06	7.81394e+06	4.4635e+06	1.01033e+07	9.05677e+06	6.18794e+06	5.98079e+06	5.64283e+06	7.38894e+06	1.0945e+06	7.03016e+06	1
High	Master Protein	A0A0A0MTS2	glucose-6-phosphate isomerase [OS=Homo sapiens]	0	275.213	41	20	377	16	573	64.8	9.04	5186	474.89	20	20	Pf00342		ENSG00000105220.14		1.294	1.469	0.781	0.143698	0.049156	0.840615	56.69	107.94	75.1	2.91096e+07	4.22361e+07	5.58043e+07	4.37726e+07	4.59364e+07	1.21002e+08	7.4805e+07	4.45296e+06	8.44498e+07	1.27076e+07	3.59955e+07	5.50043e+07	2.65853e+07	2.11923e+07	1.21002e+08	6.38478e+07	2.47969e+06	7.59791e+07	1
High	Master Protein	A0A0A0N0L3	TDP43 isoform H [OS=Homo sapiens]	0	102.997	28	8	279	8	372	41.6	7.11	3313	299.96	8	8	Pf00076, Pf13893, Pf14259	23435		TARDBP	0.995	0.836	0.908	0.863631	0.943286	0.493331	43.06	45.48	54.95	7.81595e+07	7.31961e+07	6.09805e+07	7.67372e+07	6.40592e+07	4.62693e+07	6.8613e+07	4.37836e+07	6.59977e+07	3.412e+07	6.2381e+07	60106378	4.66063e+07	2.95531e+07	4.62693e+07	5.85628e+07	2.43815e+07	5.93778e+07	1
High	Master Protein	A0A0A0N0N2	CNTFR isoform 3 [OS=Homo sapiens]	0	31.915	14	3	7	3	380	41.5	6.86	65	7.25	3	3	Pf00041, Pf00047	1271		CNTFR	0.463	0.331	0.691	0.00035291	0.0084424	0.346557	17.71	3.79	13.07	3.87995e+06	2.08981e+06	818730	743028	1.52265e+06		209439	823326		1.69376e+06	1.78103e+06	806994	451278	702462		178761	458481		1
High	Master Protein	A0A0A0U994	collagen type IV alpha 5 transcript variant 2 [OS=Homo sapiens]	0	18.635	3	3	47	1	1682	160.8	7.62	415	52.93	2	2	Pf01413	1287		COL4A5	0.01	0.95	100	1e-17	0.928038	1e-17		3.65		233855	246943						228342		102088	210456						127156		1	Oxidation [P1438; P1440; P1446; P1447; P1449; P1450]
High	Master Protein	A0A0A1HAV6	H.sapiens ras-related Hrab3B protein [OS=Homo sapiens]	0	29.509	24	4	39	2	219	24.7	5.11	278	46.95	2	4	Pf00025, Pf00071, Pf08477	5865		RAB3B	0.875	0.67	0.604	0.497509	0.42975	0.131009	32.01	10.96	17.46	2.28757e+06	2.54243e+06	1.57287e+06	2.31084e+06	1.93234e+06	792261	1.58317e+06	556127	1.03344e+06	998624	2.16677e+06	1.55032e+06	1.40349e+06	891465	792261	1.35128e+06	309687	929781	1
High	Master Protein	A0A0A1HAV9	H.sapiens ras-related Hrab4 protein [OS=Homo sapiens]	0	29.92	26	4	33	3	213	23.9	5.73	312	47.76	2	4	Pf00009, Pf00025, Pf00071, Pf08477	5867		RAB4A	0.875	0.624	0.737	0.514523	0.329066	0.477487	16.27	13.87	18.47	3.52681e+06	3.07016e+06	1.3672e+06	1.27789e+06	1.53276e+06	1.06113e+06	1.01066e+06	960457	818013	1.5396e+06	2.61653e+06	1.3476e+06	776127	707123	1.06113e+06	862625	534844	735962	1
High	Master Protein	A0A0A1TTQ0	Lutheran blood group glycoprotein [OS=Homo sapiens]	0	383.017	50	27	399	27	628	67.3	5.81	6755	530.97	27	27	Pf00047, Pf07679, Pf07686, Pf08205, Pf13895, Pf13927	4059		BCAM	2.516	1.928	0.673	1.07695e-08	0.00395183	0.280524	64.31	100.53	50.97	3.15839e+07	3.25076e+07	1.17968e+07	7.16125e+07	8.90341e+07	6.04115e+07	7.86662e+07	2.13033e+06	4.6451e+07	1.37877e+07	27704378	1.16277e+07	4.34939e+07	4.10751e+07	6.04115e+07	6.71435e+07	1.1863e+06	4.17917e+07	1	Oxidation [P154; K156]
Medium	Master Protein	A0A0A7C792	MHC class II antigen [OS=Homo sapiens]	0.018	1.11	13	1	2	1	89	10.6	9.2	0	1.87	1	1	Pf00969				0.772	2.045	2.004	0.31696	0.0713681	0.0208488	30.03	55.56	83.13	280374	424436	459326	261931	216587	911650	477368		1.12786e+06	122395	361723	452742	159084	99920.5	911650	407444		1.01473e+06	1
High	Master Protein	A0A0A7E6I2	aminopeptidase [OS=Homo sapiens]	0	58.804	13	10	68	10	941	107.1	6.34	986	63.09	10	10	Pf01433, Pf11838, Pf13485	51752		ERAP1	1.096	1.207	1.011	0.643673	0.218485	0.428431	37.98	77.13	78.54	3.80854e+06	4.59689e+06	4.15377e+06	4.13695e+06	4.62366e+06	6.39801e+06	5.82752e+06	1.57677e+06	6.19285e+06	1.66259e+06	3.91767e+06	4.09423e+06	2.51258e+06	2.13308e+06	6.39801e+06	4.97393e+06	878049	5.57168e+06	1
High	Master Protein	A0A0B4J1R2	Acyl-CoA synthetase short-chain family member 3, mitochondrial [OS=Homo sapiens]	0	116.136	28	14	130	14	685	74.5	8.63	1435	144.82	14	14	Pf00501, Pf13193	79611	ENSG00000111058.7	ACSS3	0.734	0.512	0.781	0.0715777	0.128534	0.724621	17.62	12.92	28.55	1.308e+07	1.07055e+07	9.01225e+06	9.35822e+06	7.57053e+06	5.59885e+06	7.90781e+06	4.18426e+06	4.88745e+06	5.70996e+06	9.12374e+06	8.88307e+06	5.68371e+06	3.49259e+06	5.59885e+06	6.7495e+06	2.33006e+06	4.39722e+06	1
High	Master Protein	A0A0B4J1S4	selenoprotein F [OS=Homo sapiens]	0	9.838	13	2	7	2	165	18	5.03	91	1.64	2	1	Pf08806				0.743	0.799	0.58	0.248981	0.692986	0.205592	17.47	24.4	29.69	444267	670329	525124	301736	823549	370036	548496	50079.3	358920	193941	571284	517597	183259	379937	370036	468154	27887.4	322919	1
High	Master Protein	A0A0B4J1V8	hCG2039996 [OS=Homo sapiens]	0	18.767	5	4	10	4	794	87.9	9.51	107	7.09	4	4	Pf00001, Pf04427	692312	ENSG00000243207.6	PPAN-P2RY11	1.121	1.419	1.093	0.711628	0.346011	0.593564	12.2	76.33	75.52	470028	775032	277266	520180	839820	766758	783339	3.93232e+06	695800	205187	660516	273292	315932	387443	766758	668598	2.18977e+06	626008	1
High	Master Protein	A0A0B4J1W8	ALK and LTK ligand 2 [OS=Homo sapiens]	0.004	2.317	7	1	2	1	151	16.8	9.69	0	0	1	1	Pf15129	285016	ENSG00000189292.15	FAM150B; ALKAL2	100	100	0.433	1e-17	1e-17	0.0202427			26.64						304678	56171.5		309299						304678	47943.7		278275	1
High	Master Protein	A0A0B4J2A0	Uncharacterized protein [OS=Homo sapiens]	0	55.972	20	8	98	8	478	51.5	6.83	995	72.06	8	8	Pf00370	23729	ENSG00000262304.2; ENSG00000197417.7	SHPK	0.9	1.154	1.03	0.565838	0.251623	0.337407	34.21	78.64	93.47	3.8606e+06	5.00906e+06	6.22048e+06	4.31996e+06	3.87298e+06	6.68966e+06	7.46534e+06	1.6945e+06	5.97244e+06	1.68532e+06	4.26894e+06	6.13132e+06	2.62373e+06	1.78676e+06	6.68966e+06	6.37184e+06	943606	5.37338e+06	1
High	Master Protein	A0A0B4J2A2	Peptidyl-prolyl cis-trans isomerase A-like 4C [OS=Homo sapiens]	0	11.888	21	2	46	1	164	18.1	9.22	297	50.94	2	2	Pf00160	653598	ENSG00000263464.2	PPIAL4C	0.896	0.943	1.006	0.594358	0.922272	0.623808	21.13	30.49	20.21	426541	1.05783e+06	1.12584e+06	1.00837e+06	797448	829195	1.02898e+06		790590	186204	901532	1109704	612436	367895	829195	878255		711290	1	Oxidation [P105]
High	Master Protein	A0A0C4DFL7	lanosterol 14-alpha demethylase [OS=Homo sapiens]	0	112.977	37	18	207	18	509	57.2	8.53	1507	211.67	18	18	Pf00067	1595	ENSG00000001630.15	CYP51A1	0.64	0.456	0.813	0.0135615	0.0485295	0.995606	21.03	11.46	46.28	3.64345e+07	2.92484e+07	2.83055e+07	1.72256e+07	2.21367e+07	9.27732e+06	9.89597e+06	1.67545e+07	1.14526e+07	1.59052e+07	2.49268e+07	2.78998e+07	1.0462e+07	1.02125e+07	9.27732e+06	8.44644e+06	9.32998e+06	1.03038e+07	1
High	Master Protein	A0A0C4DFM1	Transmembrane 9 superfamily member [OS=Homo sapiens]	0	122.586	21	12	140	12	625	72.5	6.65	2177	196.48	12	12	Pf02990	9777	ENSG00000101337.15	TM9SF4	1.147	0.673	0.696	0.43956	0.552633	0.333083	52.49	38.12	44.15	1.74537e+07	1.44155e+07	1.14786e+07	1.71179e+07	1.93648e+07	8.43837e+06	1.59807e+07	3.75764e+06	6.79982e+06	7.61929e+06	1.22855e+07	1.1314e+07	1.03966e+07	8.93379e+06	8.43837e+06	1.36399e+07	2.0925e+06	6.11776e+06	1
High	Master Protein	A0A0C4DFP4	Peptide-N(4)-(N-acetyl-beta-glucosaminyl)asparagine amidase [OS=Homo sapiens]	0.006	2.13	1	1	5	1	633	72	8.12	0		1		Pf01841, Pf04721, Pf09409	55768	ENSG00000151092.16	NGLY1	0.78	0.946	1.037	0.338729	0.985692	0.834742	15.54	44.42	85.56	400393	307237	254337	365282	198451	231619	378736	61824.5	321138	174789	261841	250691	221854	91553.5	231619	323260	34427.9	288926	1
High	Master Protein	A0A0C4DFT3	Disks large homolog 1 [OS=Homo sapiens]	0	112.686	24	15	101	13	892	99.8	6.04	1053	100.57	15	15	Pf00018, Pf00595, Pf00625, Pf07653, Pf09058, Pf10600, Pf10608, Pf13180	1739	ENSG00000075711.20	DLG1	1.201	1.157	0.926	0.262329	0.224067	0.491182	39.59	51.89	52.6	9.06942e+06	8.14269e+06	7.24875e+06	1.01779e+07	7.83814e+06	1.16432e+07	1.13817e+07	411390	1.14797e+07	3.95919e+06	6.93956e+06	7.14484e+06	6.18156e+06	3.61605e+06	1.16432e+07	9.71455e+06	229088	1.03283e+07	1
High	Master Protein	A0A0C4DG89	probable ATP-dependent RNA helicase DDX46 [OS=Homo sapiens]	0	211.306	31	27	263	27	1032	117.4	9.29	2870	286.22	27	27	Pf00270, Pf00271	9879	ENSG00000145833.15	DDX46	1.074	1.03	0.966	0.790168	0.439615	0.278283	35.84	43.18	45.7	3.40255e+07	3.5157e+07	3.93297e+07	3.55079e+07	4.16888e+07	3.88608e+07	3.39037e+07	2.84363e+07	3.83825e+07	1.48536e+07	2.99624e+07	3.87659e+07	2.15657e+07	1.92327e+07	3.88608e+07	2.89376e+07	1.58352e+07	3.45325e+07	1
High	Master Protein	A0A0C4DGA2	Enoyl-CoA delta isomerase 2, mitochondrial [OS=Homo sapiens]	0	251.844	58	18	275	18	364	40.2	8.76	4409	408.19	18	18	Pf00378, Pf00887	10455	ENSG00000198721.12	ECI2	1.261	1.096	0.818	0.230328	0.326011	0.918582	39.05	82.74	55.11	3.79135e+07	3.34898e+07	2.60814e+07	3.86757e+07	3.23505e+07	4.88248e+07	4.96486e+07	6.87138e+06	3.7416e+07	1.65509e+07	2.85415e+07	2.57075e+07	2.34897e+07	1.49246e+07	4.88248e+07	4.23762e+07	3.82643e+06	3.3663e+07	1
High	Master Protein	A0A0C4DGG9	Chromodomain-helicase-DNA-binding protein 4 [OS=Homo sapiens]	0	670.989	40	61	897	52	1937	220.3	6.02	9512	1197.65	61	60	Pf00176, Pf00271, Pf00385, Pf00628, Pf04851, Pf06461, Pf06465, Pf08073, Pf08074, Pf13831	1108	ENSG00000111642.14	CHD4	1.006	0.781	0.847	0.920921	0.872334	0.785375	43.02	29.31	36.41	1.17395e+08	1.32978e+08	1.56164e+08	1.32776e+08	1.24562e+08	1.65063e+08	1.07933e+08	7.34396e+07	1.64111e+08	5.12482e+07	1.1333e+08	1.53925e+08	8.06414e+07	5.74657e+07	1.65063e+08	9.21237e+07	4.08959e+07	1.4765e+08	1	Oxidation [P513; P515; P517; P519; P520]
High	Master Protein	A0A0C4DGQ8	Dehydrogenase/reductase SDR family member 7B [OS=Homo sapiens]	0	19.909	15	4	14	4	310	33.5	9.29	170	10.78	4	4	Pf00106, Pf08659, Pf13460, Pf13561	25979	ENSG00000109016.17	DHRS7B	0.918	0.697	0.712	0.596504	0.503076	0.331435	22.89	19.41	23.82	3.40969e+06	2.59237e+06	2.12126e+06	2.49322e+06	2.65114e+06	1.68114e+06	3.23377e+06	1.43022e+06	1.72019e+06	1.48847e+06	2.20933e+06	2.09085e+06	1.51426e+06	1.22308e+06	1.68114e+06	2.7601e+06	796438	1.54765e+06	1
High	Master Protein	A0A0C4DGS9	Choline/ethanolaminephosphotransferase 1 [OS=Homo sapiens]	0	8.55	13	2	5	2	280	31.3	7.93	31	4.37	1	2	Pf01066	10390	ENSG00000134255.13	CEPT1	1.103	1.103	1.052	0.802002	0.632992	0.485751	43.48	83.6	33.98	931167	864095	797943	1.15226e+06	854647	835251	908528	103745	1.47398e+06	406494	736420	786505	699824	394283	835251	775450	57771.8	1326134	1
High	Master Protein	A0A0C4DGX4	Cullin-1 [OS=Homo sapiens]	0	93.181	21	14	97	14	752	87.3	7.47	1108	94.96	14	14	Pf00888, Pf10557	8454	ENSG00000055130.15	CUL1	0.807	0.615	0.8	0.234629	0.370321	0.891136	21.94	21.79	40.69	1.01549e+07	1.12038e+07	1.3548e+07	1.38013e+07	9.36135e+06	1.07845e+07	8.89145e+06	3.13276e+06	8.68979e+06	4.43306e+06	9.54839e+06	13353768	8.38222e+06	4.31877e+06	1.07845e+07	7.58906e+06	1.74452e+06	7.81816e+06	1
High	Master Protein	A0A0D9SEM4	Serine/arginine-rich-splicing factor 4 [OS=Homo sapiens]	0	102.764	26	9	102	6	378	43.6	11.08	1160	97.95	9	9	Pf00076, Pf13893, Pf14259		ENSG00000116350.16		1.505	0.807	0.645	0.0380679	0.809616	0.154109	43.65	57.41	32.31	2.37363e+06	2.53475e+06	3.21998e+06	5.00542e+06	6.11946e+06	4.52839e+06	2.71295e+06	1.03858e+06	5.26752e+06	1.03619e+06	2.16023e+06	3.17382e+06	3.04004e+06	2.82316e+06	4.52839e+06	2.31557e+06	578348	4.73917e+06	1
High	Master Protein	A0A0D9SFF8	MAGUK p55 subfamily member 2 [OS=Homo sapiens]	0	11.84	9	3	10	3	573	64	6.7	29	2.43	3	3	Pf00018, Pf00595, Pf00625, Pf02828, Pf07653, Pf13180, Pf14685		ENSG00000108852.14		0.727	0.436	0.709	0.24431	0.0803379	0.378741	18.33	7.14	16.17	807586	632106	535285	504584	445254	115210	272936	304362	168964	352546	538708	527612	306459	205414	115210	232957	169489	152016	1
High	Master Protein	A0A0D9SGK2	Protein tyrosine phosphatase type IVA 1 [OS=Homo sapiens]	0	17.17	23	3	17	3	148	17.1	9.16	46	2.33	3	2	Pf00102, Pf00782	7803	ENSG00000112245.10	PTP4A1	0.885	0.705	0.765	0.5527	0.52324	0.603759	25.37	29.61	41.86	2.1374e+06	1.56802e+06	1.66028e+06	1.45721e+06	1.79873e+06	1.2934e+06	1.64591e+06	689749	1.17585e+06	933069	1.33634e+06	1.63648e+06	885039	829828	1.2934e+06	1.40482e+06	384096	1.05791e+06	1
High	Master Protein	A0A0F7KYT8	fragile X mental retardation autosomal homolog variant p2K [OS=Homo sapiens]	0	196.788	36	20	197	17	677	76.2	6.83	2979	232.88	20	20	Pf00013, Pf05641, Pf12235, Pf13014	8087		FXR1	1.082	0.922	0.861	0.758138	0.68989	0.690251	40.97	35.19	40.81	3.07939e+07	2.77629e+07	2.53704e+07	3.25537e+07	3.37009e+07	2.73978e+07	2.49992e+07	2.72903e+07	2.63152e+07	1.34429e+07	2.36608e+07	2.50067e+07	1.97715e+07	1.55476e+07	2.73978e+07	2.13374e+07	1.5197e+07	2.36756e+07	1
High	Master Protein	A0A0G2JI43	HLA class II histocompatibility antigen, DM beta chain [OS=Homo sapiens]	0	4.491	5	1	4	1	257	28.3	7.43	18	1.69	1	1	Pf00969, Pf07654, Pf07679, Pf08205, Pf13895		ENSG00000241296.8; ENSG00000242386.8; ENSG00000234154.10		1.509	0.557	0.537	0.175299	0.253922	0.102715	22.18	17.22	17.22	249034	282996	216930	375867	432098	124130	232085	86707.3	138662	108714	241181	213820	228283	199344	124130	198090	48284.2	124753	1
High	Master Protein	A0A0G2JIW1	Heat shock 70 kDa protein 1B [OS=Homo sapiens]	0	526.704	56	39	857	32	642	70.1	5.66	13769	1148.27	39	38	Pf00012, Pf06723		ENSG00000232804.5; ENSG00000212866.6; ENSG00000224501.5		1.214	1.009	0.776	0.282707	0.481276	0.813133	44.64	91.62	52.3	1.35726e+08	1.60151e+08	1.82989e+08	1.80732e+08	1.76795e+08	2.49546e+08	2.08608e+08	4.32878e+07	2.0319e+08	5.92502e+07	1.36488e+08	1.80366e+08	1.09767e+08	8.15629e+07	2.49546e+08	1.78052e+08	2.41054e+07	1.82809e+08	1	Oxidation [K329]
High	Master Protein	A0A0G2JJD3	HLA-B associated transcript 5, isoform CRA_b [OS=Homo sapiens]	0	39.749	16	6	34	6	601	67.5	8.84	153	32.55	6	6	Pf00561, Pf12695, Pf12697	7920	ENSG00000230475.9; ENSG00000231488.9; ENSG00000235676.9; ENSG00000224552.9; ENSG00000236063.9	ABHD16A	0.98	0.779	0.862	0.846505	0.721845	0.892737	36.89	47.34	57.89	2.70787e+06	2.53738e+06	2.14143e+06	2.45e+06	2.62041e+06	1.43283e+06	2.36518e+06	679022	2.10765e+06	1.1821e+06	2.16247e+06	2.11073e+06	1.48801e+06	1.2089e+06	1.43283e+06	2.01873e+06	378123	1.89624e+06	1
High	Master Protein	A0A0G2JL52	VARS2 [OS=Homo sapiens]	0	6.978	2	1	2	1	1093	121.5	7.21	25	2.88	1	1	Pf00133, Pf08264, Pf09334		ENSG00000234032.9; ENSG00000206476.13		1.124	0.852	0.848	0.74751	0.808832	0.716208	24.77	34.22	9.42	233073	349101	287289	350540	305823	323001	297405	135410	282379	101746	297520	283171	212901	141089	323001	253842	75405	254055	1
High	Master Protein	A0A0G2JLB3	glucosylceramidase [OS=Homo sapiens]	0	5.589	3	2	12	2	536	59.6	7.42	60	7.08	2	2	Pf02055	2629	ENSG00000262446.5	GBA	0.765	0.7	0.878	0.177434	0.50959	0.989405	11.95	29.76	58.39	2.18712e+06	2.48155e+06	1.92719e+06	1.53524e+06	2.2295e+06	1.55229e+06	2.13871e+06	396018	1.52066e+06	954770	2.11489e+06	1.89956e+06	932428	1.02856e+06	1.55229e+06	1.82544e+06	220528	1.36813e+06	1
High	Master Protein	A0A0G2JN29	Nodal modulator 1 [OS=Homo sapiens]	0	181.724	22	20	170	1	1267	139.5	5.8	2484	197.31	20	20	Pf09430, Pf13620, Pf13715, Pf14686		ENSG00000274779.4		0.939	0.529	0.617	0.720144	0.168678	0.119186	53.31	17.81	29.11	2.43509e+07	2.29271e+07	1.64717e+07	2.04388e+07	2.34305e+07	8.73384e+06	1.76069e+07	6.5233e+06	1.10432e+07	1.06302e+07	1.95395e+07	1.62355e+07	1.24135e+07	1.08095e+07	8.73384e+06	1.50279e+07	3.63259e+06	9.93552e+06	1
High	Master Protein	A0A0G2JN84	suppressor of hairy wing homolog 1 (Drosophila) [OS=Homo sapiens]	0.002	2.738	4	2	13	2	542	60.5	8.59	15	0	2	1	Pf13836	129025	ENSG00000169548.3; ENSG00000275499.2	ZNF280A	0.584	0.422	0.884	0.0138441	0.0502076	0.876797	23.47	14.54	73.22	1.59024e+06	1.65346e+06	1.65775e+06	966305	1.41417e+06	44811.3	1.25049e+06	698507	314752	694207	1.40915e+06	1.63399e+06	586885	652412	44811.3	1.06732e+06	388974	283181	1	Oxidation [P102]
High	Master Protein	A0A0G2JNK5	tRNA-splicing endonuclease subunit sen34 [OS=Homo sapiens]	0	4.851	6	2	8	2	252	27.3	9.51	79	1.68	2	2	Pf01974		ENSG00000274129.4		1.232	0.996	0.71	0.550894	0.968463	0.379492	21.89	28.21	6	206267	255232	299448	121069		504840	223350	205438	341047	90044.3	217520	295156	73531.5		504840	190635	114401	306839	1
High	Master Protein	A0A0G2JNU3	Transcription factor TFIIIB component B'' homolog [OS=Homo sapiens]	0.009	1.706	0	1	36	1	2624	293.7	5.11	0	0	1	1			ENSG00000274803.4		1.695	0.978	0.298	0.149428	0.946263	0.00084886	121.81	95.86	10.82	74274.5	98022.9	260836	433393	78869	442028	255040	23509.8	120932	32424	83539.5	257097	263221	36385.5	442028	217683	13091.8	108802	1
High	Master Protein	A0A0G2JNZ7	Epithelial discoidin domain-containing receptor 1 [OS=Homo sapiens]	0	14.012	5	3	8	3	767	85.4	6.96	31	5.01	3	3	Pf00069, Pf00754, Pf07714		ENSG00000137332.19		2.424	3.197	1.541	0.0026095	0.0061325	0.0882877	52.97	62.76	53.04	208299	321124	162218	548077	408115	1.24776e+06	942416	397017	814153	90931.3	273676	159893	332875	188280	1.24776e+06	804374	221085	732490	1
High	Master Protein	A0A0G2JPP5	protein scribble homolog [OS=Homo sapiens]	0	98.972	11	12	107	11	1655	177.6	5.1	1026	111.67	12	12	Pf00595, Pf12799, Pf13180, Pf13855, Pf14580	23513	ENSG00000274287.4; ENSG00000180900.18	SCRIB	1.14	0.898	0.844	0.421154	0.69923	0.852891	26.96	74.19	60.45	7.9893e+06	9.42077e+06	7.97078e+06	9.79376e+06	9.20768e+06	9.38384e+06	9.69872e+06	1.91369e+06	8.73827e+06	3.48767e+06	8.02879e+06	7.85652e+06	5.94824e+06	4.24788e+06	9.38384e+06	8.27809e+06	1.06567e+06	7.86178e+06	1
High	Master Protein	A0A0G2JQH2	40S ribosomal protein S18 [OS=Homo sapiens]	0	35.676	100	5	95	1	33	3.8	11	1137	141.99	4	5	Pf00416		ENSG00000227794.5		0.694	1.78	2.716	0.0458099	0.0108283	3.21312e-11	32.52	32.74	67.54	6.47859e+06	9.98409e+06	1.28137e+07	6.5437e+06	4.49569e+06	1.73995e+07	1.77733e+07	1.89761e+07	1.52721e+07	2.82818e+06	8.50888e+06	12629985	3.97431e+06	2.07405e+06	1.73995e+07	15169899	1.05671e+07	1.37402e+07	1	Acetyl [N-Term]
High	Master Protein	A0A0G2JRG0	Glutathione S-transferase theta-1 [OS=Homo sapiens]	0.006	2.025	20	1	2	1	46	5.1	6.4	0	2.21	1	1			ENSG00000277656.3		1.357	2.138	1.596	0.534842	0.124943	0.175876	81.88	42.53	80.12	67764.5	107763	151356	91971.2	144374	379382	243761		217713	29582.1	91840.5	149187	55858.7	66605.8	379382	208056		195876	1
High	Master Protein	A0A0J9YW33	Syntaxin-3 [OS=Homo sapiens]	0	12.012	13	3	7	3	287	32.9	5.45	29	4.91	3	3	Pf00804, Pf02485, Pf05739		ENSG00000166900.15		1.487	1.394	1.057	0.164409	0.307229	0.465111	33.63	41.97	68.53	675638	799293	428735	1.1659e+06	930460	1.24951e+06	871081		928728	294945	681192	422590	708108	429259	1.24951e+06	743488		835572	1
High	Master Protein	A0A0J9YWB6	RNA polymerase II subunit A C-terminal domain phosphatase [OS=Homo sapiens]	0	23.709	7	4	22	4	805	87.1	5.72	161	10.3	4	4	Pf00533, Pf03031, Pf09309, Pf12738		ENSG00000282752.1		1.148	1.438	1.162	0.648576	0.353647	0.527389	33.85	42.28	49.82	239218	427135	518095	489006	456226	397562	524387	260048	664511	104429	364024	510668	296998	210476	397562	447576	144811	597857	1
Medium	Master Protein	A0A0J9YWL9	Putative testis-expressed protein 13C [OS=Homo sapiens]	0.015	1.379	2	1	2	1	993	109.7	8.79	0	0	1	1	Pf15186	100129520	ENSG00000282815.1	LOC100129520; TEX13C																												1	Oxidation [P781; P786]
High	Master Protein	A0A0J9YXX3	zinc transporter zip11 [OS=Homo sapiens]	0.002	2.58	20	1	4	1	84	9	10.51	30	1.61	1	1			ENSG00000282291.1		1.915	2.18	0.991	0.0558431	0.0878129	0.918451	11.47	48.45	52.3	197970	210973	135669	379151	349815	396206	535967		253843	86422.3	179801	133724	230277	161384	396206	457461		228382	1
High	Master Protein	A0A0J9YYJ0	Protein canopy homolog 4 [OS=Homo sapiens]	0	14.752	19	2	4	2	118	13.3	8.43	81	5.49	2	2	Pf11938		ENSG00000166997.7		0.884	1.327	1.439	0.562728	0.296652	0.0294381	19.7	19.26	41.5	1.05327e+06	1.12039e+06	1.42789e+06	934675	945364	1.71985e+06	1.49298e+06	107847	1.58458e+06	459799	954842	1.40743e+06	567675	436135	1.71985e+06	1.27429e+06	60056.3	1.42564e+06	1
High	Master Protein	A0A0J9YYL3	poly(U)-binding-splicing factor PUF60 [OS=Homo sapiens]	0	220.317	47	17	339	17	505	54.6	5.34	5241	491.31	17	17	Pf00076, Pf13893, Pf14259		ENSG00000274081.4		1.056	0.61	0.706	0.861783	0.322706	0.445149	42.43	31.77	37.06	3.18779e+07	3.69658e+07	3.39321e+07	4.14394e+07	3.82497e+07	2.78857e+07	2.96689e+07	7.99675e+06	2.83314e+07	1.39161e+07	3.15039e+07	3.34457e+07	2.51682e+07	1.76461e+07	2.78857e+07	2.53231e+07	4.45311e+06	2.54896e+07	1
High	Master Protein	A0A0K0K1H8	Epididymis secretory sperm binding protein Li 71p [OS=Homo sapiens]	0	33.007	12	6	30	6	698	77	7.21	281	13.88	6	6	Pf00405, Pf12974	7018		TF	0.835	0.674	0.825	0.380272	0.437754	0.78891	48.31	35.47	48.86	2.03704e+06	1.03174e+06	342779	1.37969e+06	868963	742094	841984	281403	1.53501e+06	889256	879296	337865	837952	400888	742094	718653	156703	1.38104e+06	1
Medium	Master Protein	A0A0K1JRJ6	MAP7 domain containing 2 brain transcript variant 1 [OS=Homo sapiens]	0.011	1.6	2	1	7	1	757	84.1	8.51	0	0	1	1	Pf05672	256714		MAP7D2	0.887	1.146	1.293	0.651251	0.671762	0.347477	25.06	31.87	7.33	301785	468459	596753	415342	377915	436955			536857	131742	399242	588199	252258	174348	436955			483007	1	Oxidation [P233; P236; P239; K242; P245]
Medium	Master Protein	A0A0N7BBQ4	NADH-ubiquinone oxidoreductase chain 5 [OS=Homo sapiens]	0.026	0.837	5	1	1	1	162	17.7	9.45	0		1		Pf00361, Pf06455				0.858	0.677	0.538	0.532952	0.462893	0.110812	54.15	42.82	14.83	880559	368837	197649	256064	391338		133812	971823	141870	384402	314339	194816	155521	180540		114212	541173	127640	1
High	Master Protein	A0A0S2PZM4	Bifunctional arginine demethylase and lysyl-hydroxylase JMJD6 [OS=Homo sapiens]	0.001	3.604	2	1	2	1	414	47.6	8.73	0	0	1	1	Pf02373, Pf13621	23210		JMJD6	1.199	1.188	1.178	0.77617	0.68738	0.612137	48.55	45.33	48.72		96383.8	205123	142764		199046	245058	113948	224522		82142.5	202183	86707.4		199046	209163	63453.5	202001	1
High	Master Protein	A0A0S2Q0B1	AT-rich interactive domain-containing protein 1A [OS=Homo sapiens]	0	227.599	17	26	221	25	2285	241.9	6.7	2457	287.41	26	26	Pf01388, Pf12031	8289		ARID1A	0.987	0.655	0.702	0.879388	0.452763	0.430355	28.46	30.84	36.14	2.0998e+07	2.42487e+07	2.31393e+07	2.26248e+07	2.37306e+07	2.40848e+07	1.44796e+07	6.57752e+06	3.06464e+07	9.16653e+06	2.06658e+07	2.28076e+07	1.37412e+07	1.09479e+07	2.40848e+07	1.23586e+07	3.66279e+06	2.75724e+07	1
High	Master Protein	A0A0S2Z377	Annexin [OS=Homo sapiens]	0	645.633	71	55	1036	1	667	75.2	5.67	12577	1255.51	55	54	Pf00191	309		ANXA6	0.69	0.628	0.801	0.014108	0.372808	0.957063	25.99	37.4	67.15	2.06712e+08	3.14131e+08	3.14237e+08	1.58628e+08	2.25618e+08	2.42452e+08	2.56223e+08	5.72436e+07	2.07747e+08	9.02386e+07	2.67717e+08	3.09733e+08	9.63424e+07	1.04087e+08	2.42452e+08	2.18693e+08	3.18769e+07	1.86909e+08	1
High	Master Protein	A0A0S2Z3B9	Adenosine deaminase isoform 3 [OS=Homo sapiens]	0	15.553	17	2	4	2	209	23.9	5.83	45	7.01	2	2	Pf00962	100		ADA	1.568	2.533	1.751	0.124358	0.0163054	0.0346529	32.1	19.89	22.27	217904	348173	317907	483068	475516	1.33999e+06	849447		907823	95124.5	296728	313350	293391	219375	1.33999e+06	725023		816764	1
High	Master Protein	A0A0S2Z3I6	G protein-coupled receptor kinase [OS=Homo sapiens]	0	9.706	5	3	18	3	671	77.4	7.66	82	5.05	3	3	Pf00069, Pf00169, Pf00615, Pf07714	156		ADRBK1; GRK2	1.19	1.112	0.868	0.601335	0.719231	0.828481	45.76	53.34	14.38	355697	616485	672297	524602	555971	1007104	471069	491567	916420	155277	525396	662661	318617	256492	1007104	402068	273736	824499	1
High	Master Protein	A0A0S2Z3V1	EGF containing fibulin-like extracellular matrix protein 1 isoform 2 [OS=Homo sapiens]	0	17.424	13	3	10	3	413	45.7	5.47	101	1.76	3	3	Pf07645, Pf12662, Pf12947	2202		EFEMP1	1.786	1.155	0.683	0.050828	0.691499	0.351384	49.79	15.44	28.05	324732	375468		814161	550846	1.32211e+06	403061	42800	855655	141759	319991		494481	254128	1.32211e+06	344022	23833.8	769829	1
High	Master Protein	A0A0S2Z4N8	vasodilator-stimulated phosphoprotein isoform 2 [OS=Homo sapiens]	0	93.251	37	9	90	9	328	35.4	8.94	1231	130.5	9	9	Pf00568	7408		VASP	0.948	1.004	1.082	0.80786	0.478065	0.219119	37.2	35.26	38.71	4.86681e+06	6.10347e+06	6.76974e+06	5.99131e+06	4.76234e+06	9.28017e+06	5.70706e+06	2.9432e+06	9.00309e+06	2.12457e+06	5.20165e+06	6.6727e+06	3.63882e+06	2.19706e+06	9.28017e+06	4.87111e+06	1.63896e+06	8.10003e+06	1
High	Master Protein	A0A0S2Z4Z6	Serine/arginine repetitive matrix 1 isoform 2 [OS=Homo sapiens]	0	124.433	16	11	124	11	918	103.9	11.84	1892	177.87	10	11	Pf01480	10250		SRRM1	1.036	0.712	0.646	0.917569	0.63705	0.213956	45.4	41.43	33.98	2.7398e+07	1.71124e+07	2.66921e+07	3.379e+07	2.6301e+07	2.84167e+07	2.25672e+07	2.63773e+06	3.84731e+07	1.19604e+07	1.45839e+07	2.63094e+07	2.05223e+07	1.21337e+07	2.84167e+07	1.92617e+07	1.46886e+06	3.46141e+07	1	Oxidation [P778; P779; P781; P782; P784; P790]; Acetyl [N-Term]
High	Master Protein	A0A0S2Z556	polyglutamine binding protein 1 isoform 2 [OS=Homo sapiens]	0	11.37	15	3	18	3	281	32.2	6.34	247	14.11	3	1		10084		PQBP1	1.086	0.778	0.828	0.6349	0.856036	0.870605	24.7	69.55	78.6	5.83569e+06	4.58857e+06	5.25349e+06	5.04282e+06	4.69503e+06	7.2208e+06	4.32805e+06	806897	8.96856e+06	2.54753e+06	3.91058e+06	5.17819e+06	3.06275e+06	2.16601e+06	7.2208e+06	3.69409e+06	449332	8.06897e+06	1
High	Master Protein	A0A0S2Z5G3	Ceroid-lipofuscinosis neuronal 6 late infantile variant isoform 4 [OS=Homo sapiens]	0	18.69	12	2	16	2	278	32	8.92	120	22.68	2	2	Pf15156	54982		CLN6	0.798	0.399	0.623	0.310032	0.0320219	0.183293	46.34	9.42	24.72	2.1188e+06	1.61941e+06	1.54691e+06	1.38078e+06	1.45703e+06	366431	770715	360567	773322	924946	1.38014e+06	1.52473e+06	838616	672186	366431	657823	200787	695754	1
High	Master Protein	A0A0S2Z5H0	Mitochondrial ribosomal protein S28 isoform 2 [OS=Homo sapiens]	0	22.11	23	4	32	2	192	21.4	9.1	259	36.88	4	4	Pf10246	28957		MRPS28	0.975	0.807	0.828	0.838853	0.942435	0.86116	33.28	47.59	39.58	5.48507e+06	4.57732e+06	3.60935e+06	4.17384e+06	4.14595e+06	6.0513e+06	4.67437e+06	1.41887e+06	6.05773e+06	2.39447e+06	3.90099e+06	3.55761e+06	2.53498e+06	1.9127e+06	6.0513e+06	3989688	790119	5.45011e+06	1
High	Master Protein	A0A0S2Z5H5	Vacuolar protein sorting 28-like protein isoform 2 [OS=Homo sapiens]	0	10.027	12	1	7	1	204	23.5	5.16		15.56		1	Pf03997	51160		VPS28	0.88	0.784	0.993	0.608453	0.661331	0.883306	23.26	36.95	59.31	238110	568695	510420	402864	358268	500553	562445	133720	400222	103945	484667	503103	244679	165283	500553	480060	74464	360078	1	Acetyl [N-Term]
High	Master Protein	A0A0S2Z5K8	Spermatid perinuclear RNA binding protein isoform 2 [OS=Homo sapiens]	0	128.561	25	15	200	9	657	72.1	8.73	2117	216.98	15	15	Pf00035, Pf07528, Pf14709	55342		STRBP	1.341	1.039	0.85	0.107168	0.465592	0.948249	27.76	34.7	33.37	6.30639e+06	5.60575e+06	3.63216e+06	7.29375e+06	5.75926e+06	6.684e+06	5.1565e+06	5.44e+06	7.41981e+06	2.75301e+06	4.77747e+06	3.58009e+06	4.42986e+06	2.65698e+06	6.684e+06	4.40119e+06	3.02934e+06	6.67557e+06	1
High	Master Protein	A0A0S2Z5Q3	sulfatase modifying factor 2 isoform 2 [OS=Homo sapiens]	0	61.627	31	6	68	6	272	30.8	6.95	988	84.53	6	6	Pf03781	25870		SUMF2	0.996	1.234	0.944	0.968347	0.156243	0.481173	21.35	49.95	64.93	5.91566e+06	6.17064e+06	5.32933e+06	6.6306e+06	5.70924e+06	1.06656e+07	9.3677e+06	2.84682e+06	9.45364e+06	2.58244e+06	5.2589e+06	5.25294e+06	4.0271e+06	2.6339e+06	1.06656e+07	7.99555e+06	1.58529e+06	8.5054e+06	1
High	Master Protein	A0A0S2Z5Y6	Uridine-cytidine kinase 1 isoform 5 [OS=Homo sapiens]	0.002	2.732	4	1	2	1	210	23.9	6.54	14	2.05	1	1	Pf00485, Pf13207, Pf13238	83549		UCK1	0.975	0.907	0.96	0.884975	0.912779	0.944009	50.78	41.51	32.62	413209	491404	744985	464329	402742	1.07471e+06	445673	339235	1.05592e+06	180384	418796	734306	282010	185801	1.07471e+06	380393	188908	950002	1
High	Master Protein	A0A0U1RQM3	5-formyltetrahydrofolate cyclo-ligase [OS=Homo sapiens]	0	7.396	5	1	6	1	232	26.1	8.66	79	5.82	1	1	Pf01812		ENSG00000136371.10		0.814	0.593	0.728	0.353039	0.240991	0.421043	18.52	0.77	12.44	986393	1.00248e+06	990754	806935	958899	549882	578546	635300	587270	430603	854359	976552	490092	442379	549882	493802	353776	528364	1
High	Master Protein	A0A0U1RQV4	Rho-associated protein kinase 1 [OS=Homo sapiens]	0	45.845	9	9	58	7	1137	133	5.35	335	45.39	9	8	Pf00069, Pf00433, Pf01576, Pf01636, Pf02463, Pf03962, Pf04111, Pf04156, Pf05622, Pf06160, Pf07714, Pf07888, Pf08912, Pf09726, Pf09789, Pf12128, Pf14531, Pf15619		ENSG00000067900.7		1.016	0.971	1.01	0.988186	0.792749	0.580971	30.2	34.58	49.46	2.42564e+06	2.45487e+06	3.06738e+06	2.11916e+06	2.38916e+06	2.3482e+06	2.21543e+06	352964	4.47707e+06	1.0589e+06	2.09215e+06	3.02342e+06	1.28707e+06	1.10221e+06	2.3482e+06	1.89092e+06	196553	4.028e+06	1
Medium	Master Protein	A0A0U1RQW6	Disco-interacting protein 2 homolog C [OS=Homo sapiens]	0.016	1.201	1	1	2	1	1622	178	7.66	0	0	1	1	Pf00501, Pf06464	22982	ENSG00000151240.16	DIP2C																												1
High	Master Protein	A0A0U1RQX8	E3 ubiquitin-protein ligase CBL [OS=Homo sapiens]	0	6.765	4	2	13	2	882	96.8	6.71	125	10.28	2	1	Pf00097, Pf02262, Pf02761, Pf02762, Pf13639, Pf13920, Pf13923, Pf14447, Pf14634, Pf15227		ENSG00000110395.6		1.062	1.342	1.182	0.848164	0.198666	0.158556	45.81	57.14	51.52	1.87627e+06	2.95844e+06	4.17994e+06	3.63455e+06	1.89656e+06	6.64673e+06	3.22902e+06	2.58474e+06	5.78259e+06	819072	2.52131e+06	4.12003e+06	2.20744e+06	874959	6.64673e+06	2.75604e+06	1.43935e+06	5.20257e+06	1	Oxidation [P543; P544; P547; P548; P551; P560]
High	Master Protein	A0A0U1RR11	Centromere protein V-like 1 [OS=Homo sapiens]	0	6.095	7	2	6	1	272	29.9	10.11	20	7.54	1	2	Pf04828	389857; 441495	ENSG00000283093.1; ENSG00000223591.5	CENPVP1; CENPVL1; CENPVP2; CENPVL2	2.619	2.416	0.923	0.00886861	0.0935881	0.890013	0	111.4	94.81	75976.2					199018	91695.4	367603		33166.9					199018	78264.2	204705		1
High	Master Protein	A0A0U1RR32	Histone H2A [OS=Homo sapiens]	0	148.745	49	10	412	2	169	18.5	11.52	5507	556.25	10	10	Pf00125, Pf00808		ENSG00000282988.1		0.665	0.579	1.172	0.00714115	0.243704	0.0290119	20.28	25	86.73	6.46711e+08	4.20644e+08	4.25589e+08	3.88677e+08	3.34373e+08	2.52055e+08	1.97052e+08	1.05031e+10	2.9756e+08	2.82317e+08	3.58491e+08	4.19488e+08	2.36063e+08	1.5426e+08	2.52055e+08	1.68189e+08	5.84879e+09	2.67714e+08	1
High	Master Protein	A0A0U1RR71	Pleckstrin homology domain-containing family G member 3 [OS=Homo sapiens]	0.001	3.387	2	1	2	1	603	67.7	6.47	29	0	1	1	Pf00169, Pf00621		ENSG00000126822.16		1.157	0.781	0.699	0.70871	0.650294	0.357928	24.07	23.77	9.67	350870	277910	201777	345952	373741	233450	274193	241919	144086	153170	236847	198884	210114	172422	233450	234030	134716	129634	1
High	Master Protein	A0A0U1RRH6	PHD finger protein 14 [OS=Homo sapiens]	0	77.028	16	11	24	11	948	106.9	5.34	377	20.48	11	11	Pf00628, Pf13771, Pf13831, Pf13832	9678	ENSG00000106443.15	PHF14	0.731	1.476	7.608	0.25357	0.245734	7.05239e-10	10.19	81.99	98.12	125874	834909	626039	92011.6		620125	676849	9.9586e+06	107201	54949.4	711547	617065	55883.3		620125	577707	5.54559e+06	96448.4	1
High	Master Protein	A0A0U1RRL8	Spermatogenesis-associated protein 20 [OS=Homo sapiens]	0	12.761	3	2	10	2	786	88	7.27	63	5.12	2	2	Pf03190, Pf13098, Pf13899	64847	ENSG00000006282.20	SPATA20	1.326	1.615	1.275	0.395073	0.265127	0.380483	24.97	33.82	33.78	438972	258596	283462	312696	376012	597431	589571		437275	191630	220387	279399	189916	173470	597431	503213		393414	1
High	Master Protein	A0A0U1RRM6	Protein enabled homolog [OS=Homo sapiens]	0	88.79	12	7	114	7	802	87.3	7.77	1302	104.52	7	7	Pf00568, Pf08776		ENSG00000154380.17		1.021	0.89	0.926	0.918126	0.766665	0.461181	46.12	47.3	55.29	8.42595e+06	1.52735e+07	1.87705e+07	1.59347e+07	1.18792e+07	1.92185e+07	1.06037e+07	577988	2.27723e+07	3.67829e+06	1.30168e+07	1.85014e+07	9.67794e+06	5.48036e+06	1.92185e+07	9.05051e+06	321861	2.04881e+07	1
High	Master Protein	A0A0X1KG71	Negative elongation factor B [OS=Homo sapiens]	0	38.748	14	8	40	8	628	70	6.04	252	18.31	8	8	Pf06209		ENSG00000188986.6		0.701	0.586	0.923	0.0739745	0.244062	0.785229	26.84	19.2	68.9	1.00453e+06	2.00802e+06	2.60194e+06	1.54252e+06	1.84637e+06	1.82604e+06	1.68396e+06	1.24169e+06	1.28234e+06	438521	1.71132e+06	2.56464e+06	936852	851805	1.82604e+06	1.4373e+06	691452	1.15372e+06	1
High	Master Protein	A0A140T9E9	Bromodomain-containing protein 2 [OS=Homo sapiens]	0	46.977	13	8	65	5	807	88.4	9.09	363	29.63	8	8	Pf00439		ENSG00000234704.9		0.877	0.664	0.816	0.370473	0.418685	0.698174	26.83	20.61	32.35	3.32789e+06	2.83233e+06	2.99136e+06	3.48792e+06	2.36865e+06	2.20362e+06	2.21662e+06	1.99388e+06	2.35179e+06	1.45277e+06	2.41384e+06	2.94848e+06	2.11839e+06	1.09276e+06	2.20362e+06	1.89193e+06	1.11032e+06	2.1159e+06	1
High	Master Protein	A0A140TA86	MICOS complex subunit MIC13 [OS=Homo sapiens]	0	24.698	24	2	12	2	140	15.4	9.03	173	12.47	2	2		125988	ENSG00000174917.8	C19orf70	1.668	0.837	0.496	0.00520776	0.975398	0.00965417	57.42	76.57	29.69	4.32013e+06	2.7756e+06	2.55232e+06	4.20888e+06	2.47624e+06	4.34049e+06	4.60672e+06	469055	5.557e+06	1.88592e+06	2.36548e+06	2.51573e+06	2.55626e+06	1.14239e+06	4.34049e+06	3.93194e+06	261200	4.9996e+06	1
High	Master Protein	A0A140VKF9	testis tissue sperm-binding protein Li 76m [OS=Homo sapiens]	0	24.086	17	4	23	4	303	32.7	8.65	246	15.32	4	4	Pf00378	79746		ECHDC3	2.084	1.657	0.81	0.000449358	0.0876811	0.676324	39.91	78.77	49.36	1.58191e+06	1.40579e+06	894002	2.49633e+06	2.4963e+06	3.38998e+06	3.76515e+06	312108	1.76733e+06	690573	1.19808e+06	881187	1.51615e+06	1.15164e+06	3.38998e+06	3.21365e+06	173802	1.59006e+06	1
High	Master Protein	A0A142I7X2	NUP98/PHF23 fusion 2 protein [OS=Homo sapiens]	0	21.76	4	2	22	1	845	86.6	7.85	121	13.94	2	2	Pf00628, Pf13771, Pf13831	4928		NUP98	5.842	2.174	0.372	2.5264e-09	0.112885	0.00399753	41.4	127.91	23.32		83948.4	145710			646159	90698.1		637174		71544.5	143622			646159	77412.9		573262	1
High	Master Protein	A0A142K0N8	inwardly rectifying potassium channel Kir2.5 [OS=Homo sapiens]	0.006	2.043	5	1	2	1	432	49	7.01	0	2.96	1	1	Pf01007, Pf08466	3768		KCNJ12																												1	Oxidation [K239; P245]
High	Master Protein	A0A146IHP0	SUN domain-containing protein 1 [OS=Homo sapiens]	0	54.185	20	14	49	14	888	98.7	7.39	370	29.21	14	14	Pf07738, Pf09387, Pf10174, Pf14915	23353		SUN1	1.361	1.285	0.942	0.11825	0.270367	0.738683	52.77	64.63	56.2	3.87789e+06	2.98775e+06	1.74478e+06	4.9409e+06	4.9275e+06	2.14611e+06	3.42675e+06	6.40446e+06	2.26419e+06	1.69286e+06	2.54629e+06	1.71977e+06	3.00086e+06	2.27326e+06	2.14611e+06	2.92481e+06	3.56641e+06	2.03708e+06	1
High	Master Protein	A0A172Q381	endosialin [OS=Homo sapiens]	0	11.023	8	2	8	2	668	71.2	5.01	31	8.77	2	2	Pf00059, Pf01826, Pf07645, Pf09770, Pf12662, Pf14670	57124		CD248	1.38	1.399	1.096	0.301685	0.366512	0.586576	50.51	16.67	38.68	178866	458838	450496	417489		775862	587166		671559	78082.6	391042	444039	253562		775862	501160		604198	1
Medium	Master Protein	A0A172Q385	Tumor endothelial marker 5 [OS=Homo sapiens]	0.015	1.378	1	1	7	1	736	79.3	7.34	0	0	1	1	Pf01825, Pf02793, Pf12799, Pf13855	25960		GPR124; ADGRA2	0.956	0.768	0.828	0.837425	0.626606	0.716061	63.74	39.7	28.06	111570	545939	731957	276327	487798	699670	512595	228720	419139	48704.9	465274	721465	167827	225041	699670	437512	127366	377098	1	Oxidation [P1]
High	Master Protein	A0A172Q3A8	folate receptor [OS=Homo sapiens]	0	31.059	16	2	8	2	207	24.3	7.84	132	11.44	2	2	Pf03024	2348		FOLR1	2.378	6.882	2.873	0.00304779	2.18975e-07	4.02573e-07	74.95	62.46	100.83	351688	133455	199639	491677	510290	2.03661e+06	2.79259e+06		1.08923e+06	153527	113736	196777	298620	235418	2.03661e+06	2.38354e+06		979974	1
High	Master Protein	A0A182DWF2	thioredoxin reductase 2, mitochondrial [OS=Homo sapiens]	0	60.058	17	5	31	4	494	53.5	6.52	592	34.31	5	4	Pf00070, Pf02852, Pf07992, Pf13738				1.531	2.227	1.425	0.0474744	0.00884661	0.0298467	24.9	56.44	60.61	1.7483e+06	1.33231e+06	1.23237e+06	2.24174e+06	1.76791e+06	2.11604e+06	4.24149e+06		1.23566e+06	763208	1.13545e+06	1.21471e+06	1.36152e+06	815610	2.11604e+06	3.62021e+06		1.11172e+06	1
High	Master Protein	A0A1B0GTB0	Renin receptor [OS=Homo sapiens]	0	14.361	15	5	11	5	294	33	6.07	92	5.95	5	4	Pf07850		ENSG00000182220.14		0.869	0.577	0.695	0.438836	0.208018	0.290857	31.1	10.25	17.09	3.96242e+06	3.41994e+06	2.41126e+06	2.96891e+06	3.41588e+06	1.39388e+06	2.32275e+06	1.35702e+06	1.31592e+06	1.72977e+06	2.91462e+06	2.3767e+06	1.80317e+06	1.57588e+06	1.39388e+06	1.98252e+06	755677	1.18393e+06	1
Medium	Master Protein	A0A1B0GTB1	EF-hand domain-containing protein 1 [OS=Homo sapiens]	0.027	0.814	2	1	2	1	630	72.9	6.09	0	0	1	1	Pf06565, Pf13499		ENSG00000096093.15																													1	Oxidation [P201]
Medium	Master Protein	A0A1B0GTK7	histamine H2 receptor [OS=Homo sapiens]	0.018	1.122	6	1	1	1	422	46.9	9.03	0		1		Pf00001	3274	ENSG00000113749.7	HRH2	1.137	1.213	1.067	0.70958	0.56191	0.69074	8.89	16.82	16.62	579071	479166	452061	544776	641538	527404	558272		690159	252789	408367	445581	330870	295967	527404	476498		620933	1	Oxidation [P405; K407; P409]
High	Master Protein	A0A1B0GUA3	KIF1-binding protein [OS=Homo sapiens]	0	29.565	9	4	28	4	646	74.7	5.76	149	22.2	4	4	Pf12309		ENSG00000198954.7		0.771	0.754	1.024	0.198428	0.63076	0.483331	15.83	25.1	41.49	1.56261e+06	2.21371e+06	1.67976e+06	1.46444e+06	861019	778624	1.44058e+06	1.06985e+06	969569	682148	1.88662e+06	1.65568e+06	889430	397223	778624	1.22957e+06	595763	872317	1
High	Master Protein	A0A1B0GUI1	Ral GTPase-activating protein subunit alpha-1 [OS=Homo sapiens]	0.002	2.869	0	1	2	1	2495	280.2	6.44	0	0	1	1	Pf02145	253959	ENSG00000174373.16	RALGAPA1	1.539	1.739	1.165	0.320757	0.236201	0.591167	40.71	10.32	10.81	60195.1	137759	140562	153802	200434	216338	225145		241996	26277.7	117405	138547	93411.8	92468.2	216338	192166		217723	1
High	Master Protein	A0A1B0GV68	FERM, RhoGEF and pleckstrin domain-containing protein 1 [OS=Homo sapiens]	0	99.783	20	13	93	1	801	88	7.47	1207	89.12	13	12	Pf00373, Pf08736, Pf09379, Pf09380		ENSG00000152767.16		0.64	0.283	0.536	0.0194787	0.000628669	0.0198321	48.42	7.64	31.12	4.5935e+07	2.23075e+07	8.33361e+06	2.94044e+07	1.62214e+07	2898570	4.61114e+06	1.57744e+07	2.35609e+06	20052594	19011430	8.21415e+06	17858736	7.48359e+06	2898570	3.93571e+06	8784179	2.11976e+06	1
High	Master Protein	A0A1B0GVD3	Protein lin-28 homolog B [OS=Homo sapiens]	0	72.36	46	9	95	9	258	27.9	9.13	1219	88.01	9	9	Pf00313	389421	ENSG00000187772.7	LIN28B	0.811	0.652	0.849	0.256114	0.491557	0.996217	21.17	20.83	37.51	6.69577e+06	6.75006e+06	7.71182e+06	6.51362e+06	5.40387e+06	6.03078e+06	4.06791e+06	4.86854e+06	7.4747e+06	2.92299e+06	5.7527e+06	7.60128e+06	3.95605e+06	2.49303e+06	6.03078e+06	3.47206e+06	2.71111e+06	6.72495e+06	1
High	Master Protein	A0A1B0GVD5	Cathepsin D [OS=Homo sapiens]	0	218.5	48	18	294	18	409	44.2	6.54	3644	322.58	18	18	Pf00026, Pf07966, Pf14541, Pf14543		ENSG00000117984.13		0.818	0.835	0.805	0.162258	0.949314	0.997028	26.05	71	79.67	5.24304e+07	6.1905e+07	5.40044e+07	4.4167e+07	4.90541e+07	4.90139e+07	6.83392e+07	3.24091e+06	3.98828e+07	2.28881e+07	5.27582e+07	5.32303e+07	2.68248e+07	2.26307e+07	4.90139e+07	58329140	1.80474e+06	3.58824e+07	1
High	Master Protein	A0A1B0GVH5	alpha-ketoglutarate-dependent dioxygenase FTO [OS=Homo sapiens]	0	50.105	16	8	42	8	559	64.1	5.38	593	43.16	8	8	Pf12933, Pf12934		ENSG00000140718.20		0.904	0.745	0.803	0.500599	0.683595	0.651033	46.91	49.19	65.88	2.21451e+06	3.25682e+06	4.85326e+06	2.73565e+06	2.7611e+06	5.55448e+06	3.37738e+06	504364	5.01359e+06	966729	2.77561e+06	4.78369e+06	1.6615e+06	1.27381e+06	5.55448e+06	2.88268e+06	280863	4.51071e+06	1
High	Master Protein	A0A1B0GVP4	Ligand-dependent nuclear receptor corepressor-like protein [OS=Homo sapiens]	0	4.635	2	2	10	2	1871	211.4	9.04	0	0	2	2	Pf15090	254251	ENSG00000178177.15	LCORL	1.322	0.667	0.719	0.341187	0.40627	0.390183	60.64	49.03	64.33	1.05578e+06	991122	334682	1.20558e+06	1.15925e+06		352247	939010	627559	460894	844678	329885	732210	534808		300651	522901	564612	1	Oxidation [K1101]
High	Master Protein	A0A1B0GW23	ABHD14A-ACY1 readthrough [OS=Homo sapiens]	0	82.158	21	11	55	11	586	65.4	6.67	555	62.59	11	11	Pf01546, Pf07687, Pf12146, Pf12695, Pf12697		ENSG00000114786.16		1.046	1.945	0.85	0.822177	0.00334728	0.963114	60.67	100.1	89.58	3.22314e+06	5.05359e+06	5.4251e+06	3.7729e+06	3.81427e+06	34781941	1.37325e+07	541722	6.82009e+06	1.40704e+06	4.3069e+06	5.34733e+06	2.29147e+06	1.75968e+06	34781941	1.1721e+07	301666	6.136e+06	1
High	Master Protein	A0A1D8GZ56	Histone-lysine N-methyltransferase [OS=Homo sapiens]	0	20.219	1	2	22	1	1891	202.8	8.68	141	11.28	2	2	Pf00628, Pf00855, Pf00856, Pf13634				0.997	0.652	0.595	0.807889	0.392802	0.228819	18.67	16.01	6.65	115578	98138.1	77967.3	101821	97872	85478.8	50857.9	214225	56252.9	50454.6	83637.6	76849.7	61840.9	45152.3	85478.8	43408.4	119294	50610.5	1
High	Master Protein	A0A1P0AYU5	Sideroflexin [OS=Homo sapiens]	0	67.292	30	7	56	6	325	36	9.09	949	67.16	7	7	Pf03820	81855	ENSG00000107819.13	SFXN3	1.462	1.815	1.074	0.0874135	0.0627888	0.404945	42.61	84.08	119.9	1.57099e+06	1.74119e+06	740212	2.21572e+06	2.82307e+06	1.39896e+06	4.46844e+06	132242	1.547e+06	685803	1.48392e+06	729601	1.34572e+06	1.3024e+06	1.39896e+06	3.81392e+06	73641	1.39183e+06	1
High	Master Protein	A0A1S5UZ22	Receptor-type tyrosine-protein phosphatase [OS=Homo sapiens]	0	17.219	6	4	13	4	804	90.8	6.46	74	14.15	4	3	Pf00102, Pf14566	5786		PTPRA	0.847	0.89	1.286	0.431474	0.983535	0.100609	13.23	41.27	38.3	1.99268e+06	1.33806e+06	1.88027e+06	1.81884e+06	1.02413e+06	1.69732e+06	1.71079e+06	79459.5	1.7219e+06	869890	1.14036e+06	1.85332e+06	1.10467e+06	472473	1.69732e+06	1.4602e+06	44248.1	1.54919e+06	1
High	Master Protein	A0A1S5UZ25	Mediator of cell motility 1 [OS=Homo sapiens]	0	4.65	5	1	2	1	264	30	7.3	14	3.07	1	1	Pf01875	728556		MEMO1P1	0.872	1.438	1.722	0.545002	0.430471	0.105083	41.49	35.99	56.06	139625	151456	239703	111706	132043	363347	209088		287139	60952.5	129078	236267	67844.4	60916.8	363347	178462		258338	1
High	Master Protein	A0A1S5UZH2	Protein-methionine sulfoxide oxidase [OS=Homo sapiens]	0	49.742	10	6	52	6	1058	116.8	6.68	715	51.94	6	6	Pf00307, Pf00412, Pf00890, Pf01494, Pf07992, Pf11971, Pf12130, Pf13450	64780		MICAL1	0.681	0.816	1.166	0.0533658	0.797164	0.204273	20.78	30.9	38.25	1.2322e+06	2.4489e+06	2.84593e+06	1.37246e+06	1.14051e+06	1.82921e+06	1.74917e+06	1.02138e+06	1.98355e+06	537909	2.08706e+06	2.80514e+06	833562	526162	1.82921e+06	1.49296e+06	568768	1.78459e+06	1
Medium	Master Protein	A0A1U9X7M5	DPCR1 [OS=Homo sapiens]	0.026	0.825	2	1	1	1	1393	151.2	5.2	0		1		Pf05109	135656		DPCR1																												1	Oxidation [P396; P399]
High	Master Protein	A0A1U9X7R2	gnl1 [OS=Homo sapiens]	0	85.193	25	11	91	11	607	68.6	5.95	1062	76.69	11	11	Pf01926, Pf02421	2794		GNL1	1.061	1.14	1.087	0.790912	0.324056	0.244807	43.5	55.52	47.38	3.11079e+06	3.73628e+06	4.98934e+06	4.12061e+06	4.04619e+06	5.98428e+06	5.40557e+06	4.05266e+06	6.08923e+06	1.358e+06	3.18423e+06	4.91782e+06	2.50265e+06	1.86667e+06	5.98428e+06	4.61378e+06	2.25678e+06	5.47845e+06	1
High	Master Protein	A0A1U9X819	mRpS18B [OS=Homo sapiens]	0	40.613	32	6	64	1	258	29.4	9.38	317	31.84	6	6	Pf01084	28973		MRPS18B	1.017	0.586	0.727	0.900308	0.290185	0.474087	28.89	16.84	22.94	1.00634e+07	7.96949e+06	8.21871e+06	8.76564e+06	9.06373e+06	6.15739e+06	7.33795e+06	4.40609e+06	5.76557e+06	4.39309e+06	6.79195e+06	8.1009e+06	5.32381e+06	4.18147e+06	6.15739e+06	6.26311e+06	2.45359e+06	5.18726e+06	1
High	Master Protein	A0A1U9X8A1	Pbx2 [OS=Homo sapiens]	0	44.878	20	6	48	5	430	45.8	7.56	467	38.75	6	6	Pf00046, Pf03792, Pf05920				0.898	0.442	0.551	0.540059	0.0476571	0.0431957	29.47	4.79	15.27	2.51649e+06	3.20925e+06	3.24281e+06	3.59762e+06	2.45709e+06	846432	1.18996e+06	1.18484e+06	1.20527e+06	1.09855e+06	2.73507e+06	3.19632e+06	2.18501e+06	1.13355e+06	846432	1.01566e+06	659794	1.08438e+06	1
High	Master Protein	A0A1U9X8D3	PPP1R18 [OS=Homo sapiens]	0	8.292	7	2	10	2	613	67.9	5.4	39	12.81	2	2	Pf13914, Pf13916	170954		PPP1R18	0.746	0.436	0.6	0.267611	0.0907907	0.173762	10.23	4.48	7.76	384327	562193	452343	359343	316783		173659		236329	167775	479126	445859	218247	146145		148222		212624	1
High	Master Protein	A0A1U9X8J2	SKIV2L [OS=Homo sapiens]	0	75.535	13	12	70	12	1246	137.6	6.1	622	63.45	12	12	Pf00270, Pf00271, Pf08148, Pf13234	6499		SKIV2L	1.244	0.926	0.761	0.178302	0.649868	0.634133	38.22	47.96	29.32	4.51396e+06	6.39435e+06	7.50281e+06	7.36347e+06	8.02462e+06	9.93931e+06	7.70672e+06	2.54622e+06	7.69193e+06	1.97054e+06	5.44954e+06	7.39527e+06	4.4722e+06	3.70209e+06	9.93931e+06	6.57786e+06	1.4179e+06	6.92039e+06	1
High	Master Protein	A0A1U9X8Y4	chloride intracellular channel protein [OS=Homo sapiens]	0	224.098	70	19	301	19	240	26.8	5.26	4790	454.14	19	19	Pf00043, Pf13409, Pf13410, Pf13417	1192		CLIC1	0.687	0.689	0.989	0.0129772	0.559686	0.235637	29.3	35.18	63.07	6.08446e+07	8.01402e+07	9.79787e+07	5.36709e+07	5.15692e+07	6.37982e+07	8.0549e+07	3.60941e+07	6.66941e+07	2.65613e+07	6.8299e+07	9.65742e+07	3.2597e+07	2.3791e+07	6.37982e+07	68750436	2.00995e+07	6.00043e+07	1
High	Master Protein	A0A1U9X982	PRRC2A [OS=Homo sapiens]	0	66.63	9	11	74	11	2157	228.7	9.45	688	73.3	11	10	Pf07001	7916		PRRC2A	1.098	0.926	1.03	0.572465	0.675911	0.320672	44.42	35.45	60.42	5.74957e+06	5.69876e+06	4.86688e+06	6.45669e+06	3.61561e+06	10052388	5.00783e+06	351840	1.38588e+07	2.50993e+06	4.85674e+06	4.79712e+06	3.92147e+06	1.66803e+06	10052388	4.2743e+06	195927	1.24687e+07	1	Oxidation [P942; P945; P946]
High	Master Protein	A0A1U9X9D5	VarS [OS=Homo sapiens]	0	335.67	41	42	552	42	1264	140.4	7.59	6389	624.85	42	41	Pf00043, Pf00133, Pf08264, Pf09334, Pf13603	7407	ENSG00000224264.9; ENSG00000231116.9	VARS	1.317	0.965	0.754	0.114412	0.579832	0.684501	37.5	54.37	33.97	4.55614e+07	6.07537e+07	6.1253e+07	7.28693e+07	7.3858e+07	9.23701e+07	7.03591e+07	2.86431e+07	9.25201e+07	1.98895e+07	5.1777e+07	6.03749e+07	4.42572e+07	3.40737e+07	9.23701e+07	6.00532e+07	1.59503e+07	8.32399e+07	1
High	Master Protein	A0A1U9XBC3	MDC1 [OS=Homo sapiens]	0	151.414	20	19	129	1	2089	226.5	5.5	717	102.28	19	19	Pf00498, Pf05109, Pf05539	9656		MDC1																												1	Oxidation [P1655; P1662]
High	Master Protein	A0A1U9XBE0	MDC1 [OS=Homo sapiens]	0	185.66	25	22	153	4	2089	226.6	5.49	833	124.46	22	22	Pf00498, Pf05109, Pf05539	9656		MDC1	0.974	1.23	1.113	0.887637	0.208328	0.19384	38.72	89.91	93.49	5.52866e+06	5.62101e+06	4.6406e+06	6.56779e+06	4.9786e+06	2.04925e+06	1.60694e+06	1.08175e+07	4.54557e+06	2.4135e+06	4.79047e+06	4.57408e+06	3.98894e+06	2.29683e+06	2.04925e+06	1.37156e+06	6.02389e+06	4.08963e+06	1
High	Master Protein	A0A1W2PNP0	GPI transamidase component PIG-T [OS=Homo sapiens]	0	37.181	15	8	56	8	580	65.9	8.65	388	54.32	8	8	Pf04113		ENSG00000124155.17		0.842	0.519	0.719	0.322647	0.137472	0.441913	41.71	18.73	35.79	1.29513e+07	9.41168e+06	7.07494e+06	1.00261e+07	1.08452e+07	3.96375e+06	7.78609e+06	2.7235e+06	8.329e+06	5.6538e+06	8.02105e+06	6.97352e+06	6.08934e+06	5.00333e+06	3.96375e+06	6.64561e+06	1.51662e+06	7.49356e+06	1
High	Master Protein	A0A1W2PNW1	signal transducer and activator of transcription [OS=Homo sapiens]	0	19.392	6	4	44	4	679	76	7.68	383	13.94	4	4	Pf00017, Pf01017, Pf02864, Pf02865, Pf14596		ENSG00000166888.11		0.686	0.959	1.31	0.0653861	0.841224	0.0838258	19.89	46.47	54.33	1.0432e+06	2.05926e+06	2.50919e+06	761753	1.45316e+06	2.17398e+06	2.22176e+06	1.15005e+06	2.06188e+06	455400	1.75499e+06	2.47323e+06	462650	670402	2.17398e+06	1.89633e+06	640422	1.85507e+06	1
High	Master Protein	A0A1W2PNX8	Protein unc-45 homolog A [OS=Homo sapiens]	0	56.781	13	11	72	11	1084	118.3	6.71	630	57.52	11	11	Pf00515, Pf07719, Pf11701, Pf12895, Pf13181, Pf13414, Pf13424, Pf13432, Pf14559		ENSG00000140553.17		1.075	1.144	0.992	0.790497	0.368618	0.553972	29.55	61.92	55.21	1.99188e+06	3.3182e+06	3.23562e+06	2.73579e+06	3.13195e+06	4.82132e+06	4.67461e+06	2.12877e+06	3.87595e+06	869542	2.82792e+06	3.18924e+06	1.66158e+06	1.44489e+06	4.82132e+06	3.98989e+06	1.18543e+06	3.48718e+06	1
Medium	Master Protein	A0A1W2PNY3	Uncharacterized membrane protein C3orf80 [OS=Homo sapiens]	0.023	0.902	5	1	1	1	194	20.4	6.55	0		1				ENSG00000180044.5		0.876	0.938	1.204	0.556651	0.879325	0.64835	50.66	41.24	60.77	188310	130247	112591	149322	164872	59908.1	98727.4	188862		82205.2	111002	110977	90690.7	76062	59908.1	84266.2	105170		1
High	Master Protein	A0A1W2PP11	Uncharacterized protein [OS=Homo sapiens]	0.007	1.89	2	1	4	1	408	45	9.95	17	0	1	1	Pf01694, Pf05217		ENSG00000283765.1		0.904	0.538	0.772	0.601753	0.204448	0.516912	71.61	25.93	40.77	213332	203724	121411	184196	263897	44912.1	203608	45348	109556	93128.5	173623	119671	111871	121746	44912.1	173784	25252.7	98566.9	1
Medium	Master Protein	A0A1W2PP64	Uncharacterized protein [OS=Homo sapiens]	0.026	0.84	1	1	2	1	1363	153.5	5.31	0	0	1	1	Pf00207, Pf01835, Pf07677, Pf07678, Pf07703, Pf10569, Pf13249		ENSG00000214776.10			100	100		1e-17	1e-17										58584.8									50003.5			1	Oxidation [K817]
High	Master Protein	A0A1W2PPS8	Endoplasmic reticulum-Golgi intermediate compartment protein 3 [OS=Homo sapiens]	0	13.853	11	2	4	2	198	22.4	6.35	66	2.73	2	2	Pf07970		ENSG00000125991.19		1.11	0.743	0.687	0.766897	0.609434	0.317708	52.71	34.74	33.95	1.75656e+06	1.29133e+06	1.01017e+06	356431	1.49324e+06	1.20256e+06	1.61215e+06	438532	871852	766815	1.10052e+06	995686	216478	688894	1.20256e+06	1.37601e+06	244203	784401	1
Medium	Master Protein	A0A1W2PPX9	Histone-lysine N-methyltransferase SETD2 [OS=Homo sapiens]	0.015	1.287	2	1	2	1	591	67.5	5.24	0	0	1	1	Pf00856		ENSG00000181555.20		0.905	1.2	1.286	0.602122	0.671996	0.435743	17.59	34.37	20.41	142905	176030	230524	188342	143132		211167			62384.2	150021	227220	114390	66032.5		180236			1
High	Master Protein	A0A1W2PPZ5	Transcription elongation factor A protein 1 [OS=Homo sapiens]	0	105.813	43	12	116	11	301	33.9	8.38	1831	133.72	12	12	Pf01096, Pf07500, Pf08711		ENSG00000187735.13		1.094	1.032	0.977	0.695893	0.436712	0.264112	29.59	62.32	52.4	2.20234e+07	2.40295e+07	2.89779e+07	2.66717e+07	2.45104e+07	3.47181e+07	2.71905e+07	6.38628e+06	4.05664e+07	9.61415e+06	2.0479e+07	2.85626e+07	1.6199e+07	1.13076e+07	3.47181e+07	2.32077e+07	3.55629e+06	3.64974e+07	1
High	Master Protein	A0A1W2PQ51	Probable ATP-dependent RNA helicase DDX17 [OS=Homo sapiens]	0	593.017	55	46	1206	34	731	80.4	8.37	16446	1533.37	46	46	Pf00270, Pf00271	10521	ENSG00000100201.20	DDX17	1.073	0.821	0.768	0.764299	0.992705	0.761829	41.22	38.35	38.02	4.72827e+08	4.26708e+08	4.10988e+08	4.84682e+08	5.1766e+08	4.10715e+08	3.97132e+08	3.05904e+08	4.28358e+08	2.06409e+08	3.63659e+08	4.05097e+08	2.94372e+08	2.38818e+08	4.10715e+08	3.38961e+08	1.70347e+08	3.85392e+08	1	Oxidation [P360; K361; P578]
High	Master Protein	A0A1W2PQQ0	Wilms tumor protein [OS=Homo sapiens]	0	11.265	9	3	18	1	497	54.3	8.82	81	6.41	3	3	Pf00096, Pf02165, Pf13465	7490	ENSG00000184937.13	WT1	1.27	1.947	1.64	0.57672	0.157219	0.126147	71.88	46.64	36.45	335430	149867	174609	329218	357414	190302	315020	580415		146429	127723	172106	199951	164890	190302	268877	323212		1
High	Master Protein	A0A1W2PQR6	Lysosome membrane protein 2 [OS=Homo sapiens]	0	133.456	30	13	206	13	449	51	5.16	2577	261.53	13	13	Pf01130		ENSG00000138760.9		1.207	0.698	0.57	0.334546	0.590472	0.0435895	64.48	48.5	39.8	5.25109e+07	4.87249e+07	2.4186e+07	5.33801e+07	6.34187e+07	2.91664e+07	6.14637e+07	1.26164e+06	2.5997e+07	2.29233e+07	4.15255e+07	2.38393e+07	3.24204e+07	2.92576e+07	2.91664e+07	5.24607e+07	702560	2.33894e+07	1	Oxidation [P334; P358]
High	Master Protein	A0A1W2PQV2	Glycine cleavage system H protein, mitochondrial [OS=Homo sapiens]	0	44.408	33	3	37	3	100	11.1	4.25	993	55.67	3	3	Pf01597		ENSG00000140905.10		0.95	0.627	0.756	0.809876	0.412852	0.604498	29.46	32.08	52.09	8.25727e+06	7.57182e+06	6.13093e+06	6.90596e+06	6.02077e+06	6.88214e+06	5.01902e+06	74947.1	5.24383e+06	3.60465e+06	6.45304e+06	6.04304e+06	4.19433e+06	2.77763e+06	6.88214e+06	4.28385e+06	41735.4	4.71784e+06	1
High	Master Protein	A0A1W2PS27	mediator of RNA polymerase II transcription subunit 17 [OS=Homo sapiens]	0	29.448	11	5	24	5	652	74.1	8.65	197	19	5	5	Pf10156	9440	ENSG00000042429.11	MED17	0.882	0.818	0.809	0.504512	0.816906	0.723555	27.05	28.06	18.21	1.52476e+06	1.83095e+06	2.6639e+06	1.69628e+06	1.90892e+06	1.43318e+06	1.36613e+06	940267	1.26131e+06	665623	1.56041e+06	2.62571e+06	1.03024e+06	880664	1.43318e+06	1.16602e+06	523601	1.13479e+06	1
Medium	Master Protein	A0A1W6IYK6	N90-VRC38.09 light chain variable region (Fragment) OS=Homo sapiens PE=2 SV=1	0.016	1.228	11	1	1	1	113	12.3	6.6	0		1		Pf07686				0.785	0.976	1.244	0.355677	0.965401	0.458681	30.04	26.37	20.39	444644	524702	611816	463663	479985	215969	514928	597031	303804	194106	447175	603046	281606	221437	215969	439503	332465	273331	1	Oxidation [K109]
High	Master Protein	A0A1Y0BRN3	myosin VI transcript variant 007 [OS=Homo sapiens]	0	158.737	23	23	165	23	1285	148.5	8.53	1874	137.14	23	23	Pf00063	4646		MYO6	1.316	1.06	0.758	0.129007	0.381955	0.683656	52.77	50.04	29.93	1.79029e+07	1.41649e+07	9.87748e+06	2.02082e+07	1.94251e+07	1.12431e+07	1.77993e+07	1.70436e+07	9.01151e+06	7.81539e+06	1.20719e+07	9.73589e+06	1.22735e+07	8.96158e+06	1.12431e+07	1.51921e+07	9.49095e+06	8.10761e+06	1
High	Master Protein	A0A220T1R9	ANKLE2 [OS=Homo sapiens]	0	10.616	4	2	11	2	874	97.5	6.81	62	0	2	2	Pf00023, Pf01693, Pf03020, Pf12796	23141		ANKLE2	0.763	0.715	0.935	0.291055	0.521897	0.92356	14.92	16.28	26.39	599617	459242	444788	425859	398770	190576	365594	140633	260409	261758	391386	438412	258646	183969	190576	312043	78313.7	234289	1
High	Master Protein	A0A223FL01	MHC class I antigen [OS=Homo sapiens]	0	81.884	36	10	45	3	365	40.8	6	819	9.19	9	2	Pf00129, Pf07654				0.711	0.723	1.005	0.0471183	0.721482	0.309914	16.17	20.21	43.74	1.56117e+07	1.22514e+07	1.14773e+07	1.03833e+07	9.2139e+06	4.62059e+06	9.35324e+06	1.11245e+07	7.87162e+06	6.8152e+06	1.04412e+07	1.13128e+07	6.30627e+06	4.25075e+06	4.62059e+06	7.98321e+06	6.19486e+06	7.08205e+06	1
High	Master Protein	A0AV58	Striatin, calmodulin binding protein 3 [OS=Homo sapiens]	0	67.01	20	9	43	8	713	77.7	5.26	534	40.38	9	9	Pf00400, Pf08232	29966		STRN3	1.13	0.968	0.912	0.597055	0.772079	0.907317	30.49	39.29	25.59	1.91836e+06	2.46018e+06	2.64155e+06	2.44805e+06	2.73775e+06	2.94059e+06	2.94174e+06	448507	4.38491e+06	837447	2.09668e+06	2.60369e+06	1.48682e+06	1.26304e+06	2.94059e+06	2.51085e+06	249757	3.94508e+06	1
High	Master Protein	A0AV96	RNA-binding protein 47 [OS=Homo sapiens]	0	65.805	27	11	77	10	593	64.1	7.68	655	67.11	11	10	Pf00076, Pf13893, Pf14259	54502	ENSG00000163694.14	RBM47	2.649	1.819	0.742	1.07541e-07	0.0257405	0.526446	37.5	84.06	43.71	3.29421e+06	2.69642e+06	1.16731e+06	7.103e+06	8.71182e+06	6.2228e+06	8.48713e+06	890617	4.56541e+06	1.43807e+06	2.29801e+06	1.15057e+06	4.314e+06	4.01912e+06	6.2228e+06	7.24396e+06	495953	4.10748e+06	1
High	Master Protein	A0AVT1-1	Ubiquitin-like modifier-activating enzyme 6 [OS=Homo sapiens]	0	85.321	15	12	107	12	1052	117.9	6.14	772	110.05	12	12	Pf00899, Pf02134, Pf09358, Pf10585	55236	ENSG00000033178.12	UBA6	0.842	1.029	1.169	0.362376	0.416517	0.0891771	28.83	40.15	43.72	5.38187e+06	7.21955e+06	9.44201e+06	5.31311e+06	5.32161e+06	9.36756e+06	6.57379e+06	7.27708e+06	8.97405e+06	2.34942e+06	6.15282e+06	9.30666e+06	3.22692e+06	2.45508e+06	9.36756e+06	5.61088e+06	4.05235e+06	8.07391e+06	1
High	Master Protein	A0JLQ5	BXDC2 protein [OS=Homo sapiens]	0	61.899	34	9	80	9	335	39.1	9.91	538	35.57	9	9	Pf04427	55299		BRIX1	1.028	1.029	1.043	0.843793	0.463604	0.321589	30.82	64.12	61.75	5.20472e+06	5.74894e+06	5.40623e+06	6.06287e+06	5.53391e+06	4.73708e+06	3.58367e+06	1.56703e+07	4.35455e+06	2.27208e+06	4.8995e+06	5.32874e+06	3.68228e+06	2.55302e+06	4.73708e+06	3.05874e+06	8.72621e+06	3.91777e+06	1
Medium	Master Protein	A0MZ66	Shootin-1 [OS=Homo sapiens]	0.015	1.416	1	1	1	1	631	71.6	5.33	0		1			57698	ENSG00000187164.19	KIAA1598; SHTN1																												1
High	Master Protein	A0PJJ3	MBNL2 protein [OS=Homo sapiens]	0	6.822	7	2	4	2	261	28.5	8.63	70	3.71	2	2		10150		MBNL2	2.741	3.391	0.904	0.000641172	0.00165979	0.929885	30.97	8.85	52.95	401507	129006	423475	897066	1.12105e+06	1.88933e+06	1.49596e+06	61231.3	1.02423e+06	175275	109945	417404	544833	517186	1.88933e+06	1.27683e+06	34097.5	921491	1
High	Master Protein	A0PJJ9	GGT7 protein [OS=Homo sapiens]	0.001	3.694	3	1	4	1	592	62.5	5.02	16	0	1	1	Pf01019	2686		GGT7	1.125	0.707	0.629	0.916988	0.47678	0.245558	27.06	29	22.92	183941	148759	124752	167340	169146	148880	105178	64022.9	193231	80298.3	126779	122964	101634	78033.7	148880	89771.8	35652.1	173849	1
High	Master Protein	A0PJW6	Transmembrane protein 223 [OS=Homo sapiens]	0.002	2.854	3	1	4	1	202	22	11.02	37	0	1	1	Pf14640	79064	ENSG00000168569.7	TMEM223	1.175	0.754	0.597	0.827029	0.566633	0.254691	42.27	0.2	16.23	121658	105115	104861	98069.9	179578		79231.1			53109	89583.4	103358	59562.8	82846.8		67625.6			1
Medium	Master Protein	A1A4S6	Rho GTPase-activating protein 10 [OS=Homo sapiens]	0.015	1.393	1	1	2	1	786	89.3	7.18	0	0	1	1	Pf00018, Pf00169, Pf00620, Pf07653, Pf14604	79658	ENSG00000071205.11	ARHGAP10	1.185	0.692	0.584	0.734662	0.487906	0.172304	24.4	12.01	20.2	244986	201486	222244	278085	290340	153160	169638	53777	163095	106947	171715	219058	168895	133946	153160	144790	29946.5	146735	1
High	Master Protein	A1A5C4	RRBP1 protein [OS=Homo sapiens]	0	349.102	41	29	320	1	934	102.8	5.38	5238	466.84	28	29	Pf04156	6238		RRBP1	1.447	1.314	0.835	0.199238	0.483405	0.744102	63.42	51.49	43.44	179505	537087	371077	482554	307358	777379	272448		611187	78361.5	457729	365758	293079	141797	777379	232540		549882	1
High	Master Protein	A1L020	RNA-binding protein MEX3A [OS=Homo sapiens]	0	65.963	27	8	52	7	520	54.1	7.27	680	51.43	8	8	Pf00013, Pf13014, Pf13639, Pf13920, Pf13923, Pf14634	92312	ENSG00000254726.2	MEX3A	0.92	0.72	0.812	0.524567	0.561298	0.696542	22.66	16.45	28.95	3.04532e+06	3.17871e+06	2.96195e+06	3.2573e+06	2.51324e+06	2.16845e+06	1.48861e+06	2.59111e+06	2.55288e+06	1.32941e+06	2.70904e+06	2.91949e+06	1.97832e+06	1.15946e+06	2.16845e+06	1.27057e+06	1.44289e+06	2.29681e+06	1
High	Master Protein	A1L0T0	Acetolactate synthase-like protein [OS=Homo sapiens]	0	132.399	34	14	107	14	632	67.8	8.15	1246	152.88	14	14	Pf00205, Pf02775, Pf02776	10994	ENSG00000105135.15	ILVBL	0.956	0.691	0.786	0.814988	0.610264	0.816403	40.14	45.78	51.73	1.20729e+07	1.18335e+07	8.96863e+06	1.0743e+07	1.08843e+07	9.88047e+06	1.22864e+07	2.22492e+06	8.5925e+06	5.27036e+06	1.0085e+07	8.84007e+06	6.52476e+06	5.02135e+06	9.88047e+06	1.04868e+07	1.23898e+06	7.73063e+06	1
Medium	Master Protein	A1L447	USP29 protein [OS=Homo sapiens]	0.03	0.714	1	1	4	1	912	102.9	5.97	0		1		Pf00443, Pf13423	57663		USP29	1.141	1.684	1.475	0.527538	0.0387427	0.0107557	29.33	46.99	46.99	2.39603e+06	2.87452e+06	3.46491e+06	2.63211e+06	3.28121e+06	4.17855e+06	6.37553e+06	146990	4.84127e+06	1.04597e+06	2.4498e+06	3.41525e+06	1.59861e+06	1.51376e+06	4.17855e+06	5.44166e+06	81853.5	4355666	1
High	Master Protein	A1X283	SH3 and PX domain-containing protein 2B [OS=Homo sapiens]	0	83.417	24	14	90	14	911	101.5	8.69	602	58.96	14	13	Pf00018, Pf00787, Pf06347, Pf07653, Pf08239, Pf14604	285590	ENSG00000174705.12	SH3PXD2B	0.788	0.75	1.191	0.197525	0.807194	0.117077	26.03	37.99	69.9	5.4308e+06	7.04055e+06	7.32419e+06	5.73714e+06	4.12329e+06	5.28857e+06	3.5785e+06	3.05409e+06	7.44076e+06	2.37078e+06	6.00027e+06	7.2192e+06	3.48445e+06	1.90224e+06	5.28857e+06	3.05433e+06	1.70071e+06	6.69441e+06	1	Oxidation [P610; P614]
Medium	Master Protein	A2A288-1	Probable ribonuclease ZC3H12D [OS=Homo sapiens]	0.022	1.008	3	1	2	1	527	58	8.68	0	0	1	1	Pf11977	340152	ENSG00000178199.13	ZC3H12D	0.605	1.257	1.792	0.0600886	0.464725	0.0356861	19.92	27.07	38.71	426928	652003	642262	531042	241193	388279	813712		584633	186372	555666	633056	322529	111272	388279	694522		525991	1	Oxidation [P253; P255]
High	Master Protein	A2A2L5	protein RTF2 homolog [OS=Homo sapiens]	0	10.017	12	3	14	3	277	31.1	8.46	31	7.04	3	3	Pf04641	51507	ENSG00000022277.12	RTFDC1	0.888	0.673	1.081	0.577691	0.412845	0.654075	43.02	28.24	56.86	613558	801861	863762	774924	509897	510711	419244	311800	748693	267845	683382	851381	470650	235236	510711	357835	173630	673596	1
High	Master Protein	A2A3R5	40S RIBOSOMAL PROTEIN S6 [OS=Homo sapiens]	0	177.395	39	9	195	1	218	25	11.14	3998	293.33	9	8	Pf01092	6194	ENSG00000137154.12	RPS6		100	100		1e-17	1e-17											174610									97233.8		1
High	Master Protein	A2ABF8	Histone-lysine N-methyltransferase EHMT2 [OS=Homo sapiens]	0	101.604	18	15	41	15	1233	135.3	6.16	294	32.87	15	14	Pf00023, Pf00856, Pf05033, Pf12796, Pf13606, Pf13637, Pf13857	10919	ENSG00000227333.8; ENSG00000236759.7; ENSG00000206376.9; ENSG00000204371.11	EHMT2	0.846	0.952	1.125	0.394253	0.83375	0.307963	25.98	74.54	78.05	2.40822e+06	2.09672e+06	3.45197e+06	1.88768e+06	1.87894e+06	1.64754e+06	1.07449e+06	1.26312e+07	2.22957e+06	1.05129e+06	1.78692e+06	3.40249e+06	1.14648e+06	866832	1.64754e+06	917106	7.03384e+06	2.00593e+06	1
High	Master Protein	A2RRP1-1	neuroblastoma-amplified sequence [OS=Homo sapiens]	0	71.513	8	15	96	15	2371	268.4	5.96	672	36.11	14	15	Pf08314, Pf15492	51594	ENSG00000151779.12	NBAS	0.919	0.576	0.671	0.649591	0.270713	0.257999	29.28	20.14	29.47	1.49368e+07	1.12599e+07	7.15767e+06	8.61471e+06	1.03429e+07	4.55166e+06	5.99737e+06	1.13346e+07	6.08111e+06	6.52055e+06	9.59617e+06	7.05507e+06	5.23214e+06	4.77162e+06	4.55166e+06	5.11889e+06	6.31185e+06	5.47115e+06	1
High	Master Protein	A2RU51	PRR5-ARHGAP8 fusion [OS=Homo sapiens]	0.002	2.802	1	1	2	1	469	53.8	9.47	0	1.68	1	1	Pf00620, Pf00650, Pf13716	553158		PRR5-ARHGAP8	2.475	0.705	0.285	0.0181221	0.487989	0.00125202	24.15	12.37	2.34	103322			255676	214026	314164	262920	72815.6	60584.6	45104.3			155285	98739	314164	224408	40548.4	54507.6	1
High	Master Protein	A2RUF3	SLIT-ROBO Rho GTPase-activating protein 2 [OS=Homo sapiens]	0	12.382	3	1	4	1	1071	120.8	6.7	32	6.98	1	1	Pf00018, Pf00611, Pf00620, Pf07653, Pf14604	23380	ENSG00000266028.7	SRGAP2	1.441	0.555	0.387	0.203489	0.246813	0.0119032	4.45	30.66	15.4	394620	368880	379943	547455			110642		404863	172269	314376	374497	332497			94435.9		364254	1
High	Master Protein	A2VDK1	LRRC4B protein [OS=Homo sapiens]	0	5.979	3	1	4	1	420	46.9	7.94	63	3.95	1	1	Pf01462, Pf12799, Pf13306, Pf13855, Pf14580	94030		LRRC4B	1.253	0.951	0.741	0.535658	0.956149	0.444852	18.67	33.86	17.6	235061	211628	294433	322581	367769	265272	279956	78700.2	239104	102614	180359	290212	195919	169667	265272	238949	43825.3	215121	1
High	Master Protein	A3KMH1	von Willebrand factor A domain-containing protein 8 [OS=Homo sapiens]	0	17.142	4	5	11	5	1905	214.7	7.4	28	2.38	4	5	Pf00092, Pf07728, Pf13191, Pf13519	23078	ENSG00000102763.17	VWA8	1.131	0.81	0.822	0.499718	0.881	0.769562	50.22	43.94	44.06	3.75302e+06	4.39155e+06	4.41956e+06	5.47674e+06	6.57192e+06	2.78299e+06	3.39066e+06	1.62795e+06	2.29749e+06	1.63836e+06	3.74267e+06	4.35621e+06	3.3263e+06	3.0319e+06	2.78299e+06	2.89401e+06	906546	2.06704e+06	1
High	Master Protein	A3KN83-1	protein strawberry notch homolog 1 [OS=Homo sapiens]	0.001	3.429	1	1	1	1	1393	154.2	7.88		0		1	Pf09595, Pf13871, Pf13872	55206	ENSG00000139697.13	SBNO1																												1
High	Master Protein	A4D0R4	B-cell receptor-associated protein 29 [OS=Homo sapiens]	0	15.68	10	2	13	2	240	28.2	9.55	95	18.89	2	1	Pf04111, Pf05529, Pf09731, Pf13851	55973		BCAP29	0.767	0.69	0.743	0.261267	0.435712	0.508153	22.44	27.32	32.92	1.48287e+06	1.22223e+06	601780	1.18102e+06	1.27936e+06	379544	1.33652e+06	127235	800034	647337	1.04164e+06	593154	717290	590220	379544	1.14075e+06	70852.8	719786	1
Medium	Master Protein	A4D152	similar to Neuronal protein 3.1 (p311 protein) [OS=Homo sapiens]	0.015	1.31	7	1	5	1	136	15.5	9.61	0	0	1	1	Pf11092	389473		LOC389473	0.381	0.255	0.669	0.000465329	0.00517353	0.306969	5.91	3.21	25.22	598283	583407	562863	160901	222042	318846	335007	148575	98958	261176	497205	554795	97722.9	102437	318846	285936	82736.3	89032	1	Oxidation [K102; K107]
High	Master Protein	A4D1P6-1	WD repeat-containing protein 91 [OS=Homo sapiens]	0	17.135	4	2	12	2	747	83.3	6.58	139	8.41	2	2	Pf00400	29062	ENSG00000105875.13	WDR91	1.871	1.781	0.822	0.0325719	0.165333	0.712093	25.57	36.94	34.19	91714.4	322465	335049	566192	522018	663140	623797	165670	512006	40037.3	274819	330246	343877	240828	663140	532425	92255.8	460649	1
High	Master Protein	A4D2D2	Procollagen C-endopeptidase enhancer [OS=Homo sapiens]	0	52.481	24	6	26	6	449	47.9	7.43	167	15.45	6	6	Pf00431, Pf01759	5118		PCOLCE	0.754	1.251	0.888	0.152863	0.325057	0.930203	20.88	111.76	54.19	1.7758e+06	2.17264e+06	1.79369e+06	1.36302e+06	1.38457e+06	1.98666e+06	975644	1.51626e+07	1.71033e+06	775214	1.85162e+06	1.76798e+06	827830	638760	1.98666e+06	832735	8.4435e+06	1.53877e+06	1
High	Master Protein	A4D7U3	Activating transcription factor 2 splice variant ATF2-var0 [OS=Homo sapiens]	0	8.544	10	1	2	1	377	40.7	8.44	17	2.68	1	1	Pf00170, Pf07716	1386		ATF2	0.626	0.345	0.551	0.0973634	0.0294908	0.177629	7.07	0.38	5.61	273994	286074		198373	154746			96603.4		119610	243805		120482	71390.7			53795		1
High	Master Protein	A4FU00	SYT2 protein [OS=Homo sapiens]	0	6.605	4	1	2	1	317	35.6	5.81	41	2.06	1	1	Pf00168	127833		SYT2	1.142	0.749	0.648	0.749737	0.583835	0.277811	15.95	51.89	35.76	197750	249670	251312	315696	285032	210040	321560	86693.9		86326.2	212780	247709	191738	131497	210040	274459	48276.7		1
High	Master Protein	A4FU01	Myotubularin-related protein 11 [OS=Homo sapiens]	0.006	2.015	1	1	4	1	709	79.5	7.03	0	1.86	1	1	Pf06602, Pf12578	10903	ENSG00000014914.20	MTMR11	0.871	0.577	0.709	0.483171	0.232218	0.37007	71.3	15.41	38.2	1.41154e+06	1.01592e+06	760660	1.2291e+06	1.16613e+06	242218	871418	403040	586087	616197	865814	749756	746491	537982	242218	743776	224438	527300	1
High	Master Protein	A4FUT8	JMJD1B protein [OS=Homo sapiens]	0	88.97	14	13	83	12	1551	169	7.52	392	86.06	12	13	Pf02373	51780		KDM3B	1.01	0.767	0.839	0.90475	0.862392	0.999383	28.94	32.86	48.14	5.17727e+06	5.6923e+06	7.2765e+06	7.43379e+06	4.32666e+06	1.0284e+07	4.88322e+06	2.65046e+06	9.79147e+06	2.2601e+06	4.85123e+06	7.17219e+06	4.51491e+06	1.99606e+06	1.0284e+07	4.16794e+06	1.47595e+06	8.80933e+06	1
High	Master Protein	A4FVA6	MTCH1 protein [OS=Homo sapiens]	0	27.826	20	6	36	6	370	39.7	9.48	390	25.25	6	6	Pf00153	23787		MTCH1	1.003	0.756	0.686	0.981364	0.746406	0.286765	42.6	33.52	19.03	8.59269e+06	6.18054e+06	3.55115e+06	5.14293e+06	6.84432e+06	1.3923e+06	3.79967e+06	5.27283e+06	1.40566e+06	3.75108e+06	5.26733e+06	3.50025e+06	3.12356e+06	3.15756e+06	1.3923e+06	3.24311e+06	2.93625e+06	1264667	1
Medium	Master Protein	A4FVA8	DFNA5 protein [OS=Homo sapiens]	0.011	1.612	2	1	2	1	437	47.7	5.16	0		1		Pf04598	1687		DFNA5; GSDME	0.157	0.269	1.713	1.6207e-07	0.0111781	0.204433	1.24	8.35	126.68	139881	269687	90904.1	18469.1		26103.8	107952	5391.95	37601.9	61064.1	229840	89601.1	11217.2		26103.8	92139.8	3002.58	33830.2	1	Oxidation [K41]
High	Master Protein	A4GYN5	NADH-ubiquinone oxidoreductase chain 5 OS=Homo sapiens GN=ND5 PE=3 SV=1	0	24.899	6	2	6	1	603	67	9.03	177		2		Pf00361, Pf00662, Pf06455																															1
High	Master Protein	A4QN18	Protein transport protein Sec16 [OS=Homo sapiens]	0	25.865	3	4	26	4	1961	210.9	5.49	226	21.56	4	4	Pf12931, Pf12932	9919		SEC16A	1.427	0.945	0.664	0.166399	0.899265	0.268131	19.71	42.53	20.51	757685	1.03674e+06	1.03687e+06	1.2225e+06	1.21769e+06	1.65953e+06	1.20484e+06	568754	1.03415e+06	330762	883559	1.02201e+06	742486	561771	1.65953e+06	1.02836e+06	316719	930421	1
High	Master Protein	A4QPB0	IQ motif containing GTPase activating protein 1 [OS=Homo sapiens]	0	269.433	27	36	335	33	1657	189.2	6.48	4029	380.5	36	34	Pf00307, Pf00397, Pf00616, Pf03836, Pf11016	8826		IQGAP1	1.316	0.978	0.809	0.151544	0.551082	0.968259	35.97	78.06	50.13	2.40713e+07	3.10219e+07	2.74853e+07	3.4909e+07	4.06689e+07	3.34321e+07	4.30541e+07	8.20245e+06	3.057e+07	1.05082e+07	2.64382e+07	2.70913e+07	2.1202e+07	1.87622e+07	3.34321e+07	3.67477e+07	4.56765e+06	2.75037e+07	1
Medium	Master Protein	A4UU13	prostate specific membrane antigen variant F [OS=Homo sapiens]	0.03	0.714	1	1	1	1	735	82.4	6.81	0		1		Pf02225, Pf04253, Pf04389	2346		FOLH1																												1	Oxidation [K44]
High	Master Protein	A4VCI1	Dnajc1 protein [OS=Homo sapiens]	0	10.497	36	4	14	4	223	25	8.73	35	2.01	4	4	Pf00249	64215		DNAJC1	0.934	0.938	1.539	0.737037	0.980542	0.0309538	42.76	48.24	80.24	686574	525425	426965	812980	415571	744263	901817		1.30689e+06	299719	447790	420845	493763	191720	744263	769722		1.17581e+06	1
High	Master Protein	A4ZVS8	Protein inhibitor of activated STAT1 [OS=Homo sapiens]	0	10.838	4	2	7	2	651	71.8	7.3	122	4.5	2	1	Pf02891, Pf14324	8554		PIAS1	0.883	0.906	1.012	0.5168	0.972686	0.617193	8.03	12.34	18.33	376822	942683	1.03456e+06	968303	793564	928758	825031	862574	944548	164499	803396	1.01973e+06	588099	366103	928758	704184	480337	849805	1
High	Master Protein	A5I8L2	MHC class I antigen [OS=Homo sapiens]	0	70.736	46	9	43	1	273	31.5	5.54	652	10.45	8	3	Pf00129, Pf07654	3105		HLA-A	0.993	1.023	0.966	0.923289	0.890337	0.997574	20.31	49.55	45.5	390396	304237	269823	282892	366869		311356	545731	207295	170425	259284	265955	171814	169251		265750	303898	186503	1
High	Master Protein	A5PLM9	Cathepsin L1 [OS=Homo sapiens]	0	28.894	15	3	22	3	333	37.5	5.45	475	27.03	3	3	Pf00112, Pf08246	1514		CTSL; CTSL1	1.013	1.665	1.163	0.979588	0.0611165	0.226393	42.32	39.07	63.57	1.68518e+06	2.19496e+06	2.3046e+06	448237	1.90167e+06	5.26495e+06	3.80655e+06	2.63643e+06	3.22345e+06	735654	1.87064e+06	2.27157e+06	272237	877320	5.26495e+06	3.24898e+06	1.46813e+06	2.90013e+06	1
High	Master Protein	A5PLN9-1	Trafficking protein particle complex subunit 13 [OS=Homo sapiens]	0.01	1.683	2	1	1	1	417	46.5	5.6	0		1		Pf06159	80006	ENSG00000113597.17	C5orf44; TRAPPC13	1.416	1.292	0.964	0.229818	0.504145	0.910315	18.64	100.69	93.3	436330	313209	404387		494537	594698	1.15028e+06	167657	522561	190477	266931	398590		228150	594698	981790	93362.2	470146	1
High	Master Protein	A5Y5A3	PC1/MRPS28 fusion protein [OS=Homo sapiens]	0	15.844	13	3	20	1	278	31.2	6.19	182	20.02	3	3	Pf04201, Pf10246	7163		TPD52	1.65	2.708	1.601	0.197905	0.0269026	0.130649	41.44	28.19	58.88	206808			341237	245862	951049	463586		676548	90280.5			207250	113426	951049	395681		608687	1
High	Master Protein	A5YKK6	CCR4-NOT transcription complex subunit 1 [OS=Homo sapiens]	0	133.295	13	25	214	25	2376	266.8	7.11	1392	178.26	25	25	Pf04054, Pf12842	23019	ENSG00000125107.17	CNOT1	0.922	0.707	0.785	0.64519	0.632872	0.848353	33.92	30.75	37.66	1.26145e+07	1.84767e+07	2.30279e+07	1.60838e+07	1.75726e+07	1.59905e+07	1.55808e+07	5.68651e+06	1.74925e+07	5.50676e+06	1.57466e+07	2.26978e+07	9.7685e+06	8.10694e+06	1.59905e+07	1.32985e+07	3.16661e+06	1.57379e+07	1
High	Master Protein	A6H8V1	Slit homolog 1 (Drosophila) [OS=Homo sapiens]	0	9.829	3	3	5	3	1534	167.8	6.57	0	0	3	2	Pf00008, Pf00054, Pf01462, Pf02210, Pf12799, Pf13306, Pf13385, Pf13855, Pf14580	6585		SLIT1	0.647	0.474	0.968	0.11755	0.135908	0.938099	20.16	10.69	16.83	559578	404969	100955	138841		176771	93795.4	32871.6	151688	244280	345132	99508.3	84325.4		176771	80056.5	18305	136473	1
High	Master Protein	A6H8Y5	Nibrin [OS=Homo sapiens]	0	51.024	19	9	42	9	754	84.9	7.06	438	35.38	9	9	Pf00498, Pf00533, Pf08599	4683		NBN	1.032	1.218	0.999	0.906927	0.364048	0.615839	55.24	67.27	69.21	1.36305e+06	1.91093e+06	2.31319e+06	1.95136e+06	1.27614e+06	3.43026e+06	2.23584e+06	350875	3.21096e+06	595028	1.62858e+06	2.28003e+06	1.18516e+06	588735	3.43026e+06	1.90834e+06	195390	2.88888e+06	1
High	Master Protein	A6NDG6	glycerol-3-phosphate phosphatase [OS=Homo sapiens]	0	55.527	31	6	55	6	321	34	6.14	372	61.55	6	6	Pf00702, Pf13242, Pf13344, Pf13419	283871	ENSG00000184207.8	PGP	0.801	1.121	1.214	0.199449	0.333875	0.101793	34.13	52.67	70.69	3.8259e+06	4.99318e+06	6.50958e+06	3.34263e+06	3.1837e+06	7.29453e+06	4.50631e+06	264629	7.57675e+06	1.67017e+06	4.2554e+06	6.41627e+06	2.03015e+06	1.46877e+06	7.29453e+06	3.84624e+06	147362	6.81677e+06	1
High	Master Protein	A6NDU8	UPF0600 protein C5orf51 [OS=Homo sapiens]	0	12.294	7	1	10	1	294	33.6	5.26	96	7.2	1	1		285636	ENSG00000205765.8	C5orf51	1.323	1.27	1.596	0.364088	0.529103	0.126316	62.33	37.28	23.12	159669	372596	499061	285692	266469	660195	440379		508739	69702.2	317543	491907	173515	122933	660195	375874		457710	1
High	Master Protein	A6NEM2	Host cell factor 1 [OS=Homo sapiens]	0	228.7	19	26	311	1	2080	213.3	7.33	3537	339.45	26	25	Pf01344, Pf13415, Pf13418, Pf13854, Pf13964	3054	ENSG00000172534.13	HCFC1	1.013	0.867	0.849	0.930315	0.847289	0.74678	38.31	68.74	69.32	2.66514e+07	3.7715e+07	4.87199e+07	3.41497e+07	3.13544e+07	5.26154e+07	3.89424e+07	5.50411e+06	5.11314e+07	1.16345e+07	3.21424e+07	4.80215e+07	2.07408e+07	1.44651e+07	5.26154e+07	3.32383e+07	3.06504e+06	4.60027e+07	1
High	Master Protein	A6NFI3	Zinc finger protein 316 [OS=Homo sapiens]	0	28.609	4	2	4	2	1004	108.4	5.31	91	6.98	2	2	Pf00096, Pf01352, Pf13465	100131017	ENSG00000205903.6	ZNF316	1.295	1.613	0.852	0.397418	0.166539	0.951981	39.8	34.83	29.06	184741	200846	677505	1.17869e+06	190266	1.88582e+06	981090		1.38154e+06	80647.3	171170	667793	715879	87777.5	1.88582e+06	837383		1.24297e+06	1
High	Master Protein	A6NFX8	ADP-sugar pyrophosphatase [OS=Homo sapiens]	0	73.688	44	10	94	10	232	25.9	5.19	1037	93.9	9	10	Pf00293		ENSG00000165609.12		1.041	0.851	0.89	0.779245	0.862132	0.622758	50.09	45.34	51.55	9.90037e+06	1.19319e+07	1.33083e+07	1.22222e+07	1.12859e+07	1.38098e+07	1.19933e+07	1.11291e+06	1.35879e+07	4.32194e+06	1.01689e+07	1.31176e+07	7.42313e+06	5.20664e+06	1.38098e+07	1.02366e+07	619742	1.2225e+07	1	Acetyl [N-Term]
High	Master Protein	A6NGN9	IgLON family member 5 [OS=Homo sapiens]	0	4.647	6	1	2	1	336	36.8	7.34	22	0	1	1	Pf00047, Pf07679, Pf07686, Pf13895, Pf13927	402665	ENSG00000142549.9	IGLON5	0.836	0.01	0.01	0.473064	1e-17	1e-17	39.91			190247	179799		227551	105023					83050.8	153232		138203	48451.5					1
Medium	Master Protein	A6NHN6	Nuclear pore complex-interacting protein family member B15 [OS=Homo sapiens]	0.022	1.003	2	1	7	1	443	51.2	10.49	0	0	1	1	Pf06409	440348	ENSG00000196436.8	NPIPB15; NPIPL2																												1
High	Master Protein	A6NHR9-1	structural maintenance of chromosomes flexible hinge domain-containing protein 1 [OS=Homo sapiens]	0	141.271	17	24	150	24	2005	226.2	7.3	1739	154.87	22	24	Pf06470, Pf13589	23347	ENSG00000101596.14	SMCHD1	1.186	0.862	0.744	0.303358	0.824031	0.577878	32.28	24.69	23.92	1.00726e+07	1.1803e+07	1.16686e+07	1.23723e+07	1.40479e+07	1.45199e+07	9.87773e+06	8.34054e+06	1.16547e+07	4.39712e+06	1.00591e+07	1.15013e+07	7.5143e+06	6.48089e+06	1.45199e+07	8.43088e+06	4.64455e+06	1.04857e+07	1
High	Master Protein	A6NIH7	Protein unc-119 homolog B [OS=Homo sapiens]	0	39.418	27	5	30	4	251	28.1	5.68	168	31.96	5	5	Pf05351	84747	ENSG00000175970.10	UNC119B	0.959	0.795	0.887	0.770403	0.794202	0.992186	30.61	24.61	29.89	2.47325e+06	2.97329e+06	3.83605e+06	2.69709e+06	2.24269e+06	3.90978e+06	2.72222e+06	1.48369e+06	3.73716e+06	1.07968e+06	2.53397e+06	3.78106e+06	1.63808e+06	1.03464e+06	3.90978e+06	2.32348e+06	826216	3.3623e+06	1
High	Master Protein	A6NJ78	Probable methyltransferase-like protein 15 [OS=Homo sapiens]	0	26.023	10	3	22	3	407	46.1	8.62	202	12.67	3	3	Pf01795, Pf13659	196074	ENSG00000169519.20	METTL15	1.024	0.702	0.716	0.974624	0.481905	0.389757	41.53	23.21	26.15	1.17908e+06	1.02585e+06	745326	1.22634e+06	1.17597e+06	620950	1.02942e+06	349998	641354	514719	874279	734642	744820	542524	620950	878631	194902	577023	1
Medium	Master Protein	A6NLB9	39S ribosomal protein L52, mitochondrial [OS=Homo sapiens]	0.016	1.248	13	1	2	1	52	6.1	9.69	0	0	1	1			ENSG00000172590.18																													1
High	Master Protein	A6NMQ1	DNA polymerase [OS=Homo sapiens]	0.001	3.189	1	1	2	1	1468	166.4	5.81	23	1.7	1	1	Pf00136, Pf03104, Pf08996, Pf12254	5422	ENSG00000101868.10	POLA1	0.691	0.69	1.045	0.195346	0.495419	0.829554	16.92	35.23	86	358640	253297	469614	186254	304771		313324	87454.2	323924	156562	215871	462883	113121	140603		267429	48700.1	291433	1
High	Master Protein	A6NN50	Obscurin-like protein 1 [OS=Homo sapiens]	0.002	2.715	0	1	3	1	1804	197	5.62	0	0	1	1	Pf00041, Pf00047, Pf01108, Pf07679, Pf07686, Pf13895, Pf13927		ENSG00000124006.14		1.253	1.336	0.793	0.663057	0.550329	0.597502	34.45	56.72	32.76	151530	143131	197402	189879	169301	393847	202410	118047	312189	66149.1	121983	194572	115323	78105.2	393847	172761	65736.3	280875	1
High	Master Protein	A6NP46	glycerol kinase [OS=Homo sapiens]	0.003	2.468	6	1	2	1	118	13.1	5.24	20	0	1	1	Pf00370		ENSG00000198814.12		1.042	0.55	0.528	0.914744	0.219915	0.100491	19.08	9.38	10.52	255402	209369	168544	175564	235406	246156	288701	92752	111191	111494	178433	166128	106629	108602	246156	246413	51650.3	100038	1
High	Master Protein	A6PW57	Phosphatidylinositol 4-phosphate 5-kinase type-1 alpha [OS=Homo sapiens]	0	10.061	3	1	12	1	550	61.2	8.34	251	8.58	1	1	Pf01504	8394	ENSG00000143398.19	PIP5K1A	0.879	0.815	0.845	0.591595	0.736547	0.693535	16.03	18.76	24.5	329843	349947	406843	307735	260998	392732	320101	203696	331671	143991	298241	401011	186903	120409	392732	273214	113431	298403	1
High	Master Protein	A6QKW0	SHINC3 [OS=Homo sapiens]	0	86.993	32	9	150	9	247	27.9	9.7	1346	141.6	9	9	Pf03661	55161		TMEM33	0.78	0.458	0.619	0.178063	0.0648164	0.130498	34.09	8.17	28.01	2.35811e+07	2.44521e+07	1.72709e+07	1.97768e+07	2.21667e+07	7.97706e+06	1.19363e+07	7.66601e+06	1.03063e+07	1.02942e+07	2.08392e+07	1.70233e+07	1.20114e+07	1.02264e+07	7.97706e+06	1.01879e+07	4.26892e+06	9.27253e+06	1
High	Master Protein	A6ZKI3	Retrotransposon Gag-like protein 8B [OS=Homo sapiens]	0	5.346	18	2	16	2	113	13.2	5.07	25	0	2	2		8933	ENSG00000134590.13	FAM127A; RTL8C	0.972	1.175	0.898	0.84167	0.53881	0.921857	61.81	64.48	71.85	482910	729522	786974	480067	305468	1.32025e+06	770216	403984	966941	210811	621731	775693	291569	140925	1.32025e+06	657397	224964	869952	1
Medium	Master Protein	A7E2F9	SIPA1L2 protein [OS=Homo sapiens]	0.028	0.778	1	1	1	1	1498	165.6	6.84	0		1		Pf00595, Pf02145, Pf11881	57568		SIPA1L2		100	100		1e-17	1e-17											315623									175759		1
High	Master Protein	A7MD03	CCDC132 protein [OS=Homo sapiens]	0.001	3.437	2	2	3	2	957	110.3	6.07	22	0	2	1	Pf10474, Pf10475	55610		CCDC132; VPS50	2.028	2.868	1.238	0.0930578	0.0379987	0.598048	45.36	35.39	30.31	37164.8	62836.5	76107.6	107095	104396	154309	124574		198345	16224	53552.1	75016.6	65043.9	48162	154309	106327		178450	1
High	Master Protein	A7MD96	SYNPO protein [OS=Homo sapiens]	0	48.018	8	4	15	4	887	94.7	9.74	121	18.27	4	4		11346		SYNPO	3.94	7.947	1.628	4.81037e-07	1.84393e-10	0.00359961	68.93	66.66	66.15	224317	299918	457298	1.30565e+06	1.84882e+06	5.31367e+06	6.02053e+06		2.25862e+06	97924.2	255603	450743	792989	852935	5.31367e+06	5.13866e+06		2.03207e+06	1
High	Master Protein	A7YA96	gamma-glutamyl carboxylase [OS=Homo sapiens]	0	6.473	3	2	23	2	758	87.5	7.87	104	0	2	2	Pf05090	2677		GGCX	1.358	0.399	0.357	0.305336	0.0516005	0.00270535	50.6	17	14.51	1.19242e+06	758453	624957	1.11954e+06	1.50775e+06	247522	805514	117606	194346	520541	646387	615998	679952	695586	247522	687525	65490.6	174852	1
High	Master Protein	A8JLH9	ATP synthase subunit A [OS=Homo sapiens]	0	5.822	4	1	18	1	226	24.8	9.99	393	22.58	1	1	Pf00119				1.146	0.412	0.603	0.397914	0.0286509	0.0958424	53.49	11.26	30.28	8.01478e+06	9.43444e+06	7.39995e+06	9.18132e+06	1.24937e+07	2.62828e+06	7.53414e+06	1.826e+06	3.30318e+06	3.4988e+06	8040449	7293880	5576277	5.76383e+06	2.62828e+06	6.43057e+06	1.01683e+06	2.97186e+06	1
High	Master Protein	A8K079	Methyl-CpG-binding protein 2 [OS=Homo sapiens]	0	20.454	13	5	14	5	486	52.5	9.95	113	7.23	5	5	Pf01429	4204		MECP2	1.34	1.666	1.295	0.30747	0.108763	0.0825899	23.71	44.62	34.81	1.3339e+06	1.00093e+06	676041	1.29124e+06	1.43064e+06	1.41788e+06	1.82435e+06	2.13046e+06	958746	582303	853034	666350	784237	660011	1.41788e+06	1.55713e+06	1.18638e+06	862579	1
High	Master Protein	A8K097	cDNA FLJ78373, highly similar to Homo sapiens PCI domain containing 2, mRNA [OS=Homo sapiens]	0	47.994	21	6	41	6	399	46	8.34	455	43.38	6	6	Pf01399	55795		PCID2	0.796	0.676	0.85	0.16797	0.480144	0.851929	17.28	19.02	32.38	3.17678e+06	3.16605e+06	3.22459e+06	2.81335e+06	2.87997e+06	3.00808e+06	3.00741e+06	1.94004e+06	2.98205e+06	1.3868e+06	2.69825e+06	3.17837e+06	1.70869e+06	1.32865e+06	3.00808e+06	2.56689e+06	1.08034e+06	2.68293e+06	1
High	Master Protein	A8K0B9	rRNA adenine N(6)-methyltransferase [OS=Homo sapiens]	0	6.652	4	1	4	1	346	39.5	9.25	65	6.09	1	1	Pf00398	51106		TFB1M	1.384	1.251	0.93	0.282388	0.577153	0.923071	20.27	19.24	7.31	447218	264845	234425	377727	324473	368824	301706	331193	359000	195230	225713	231064	229412	149693	368824	257513	184430	322991	1
High	Master Protein	A8K0D2	cDNA FLJ77740, highly similar to Homo sapiens 7-dehydrocholesterol reductase, mRNA [OS=Homo sapiens]	0	68.928	20	9	170	9	475	54.4	8.78	2110	165.35	9	8	Pf01222	1717		DHCR7	0.605	0.304	0.611	0.00104114	0.000846594	0.11198	25.48	4.49	27.74	7.46378e+07	6.57517e+07	5.07048e+07	4.68575e+07	4.78221e+07	1.75618e+07	2.89592e+07	1.64249e+07	2.86173e+07	3.25826e+07	5.60365e+07	4.9978e+07	2.84589e+07	2.20623e+07	1.75618e+07	2.47174e+07	9.14646e+06	2.57468e+07	1
High	Master Protein	A8K0P2	cDNA FLJ76209, highly similar to Homo sapiens inorganic pyrophosphatase 2 (PPA2), transcript variant 2, mRNA [OS=Homo sapiens]	0	170.997	64	14	174	1	274	31.6	7.43	1725	203.53	14	14	Pf00719	27068		PPA2	1.452	1.313	0.904	0.415442	0.601054	0.805093	10.97	0	8.36		101152		157695	146828	99849.5	132801				86206.4		95776.1	67737.6	99849.5	113349			1
High	Master Protein	A8K0T9	cDNA FLJ75422, highly similar to Homo sapiens capping protein (actin filament) muscle Z-line, alpha 1, mRNA [OS=Homo sapiens]	0	154.979	69	13	219	1	286	32.9	5.69	3427	332.43	13	13	Pf01267	829		CAPZA1	1.219	1.63	1.337	0.506643	0.231246	0.271745	35.67	0	35.67			361593		347177	559205	589237					356410		160167	559205	502927			1	Oxidation [K66]
High	Master Protein	A8K103	cDNA FLJ75454, highly similar to Homo sapiens arrestin, beta 1 (ARRB1), transcript variant 1, mRNA [OS=Homo sapiens]	0	10.812	9	3	25	2	418	47	6.48	94	8.19	3	3	Pf00339, Pf02752	408		ARRB1	1.062	0.752	0.708	0.863262	0.624441	0.371923	38.24	54.89	39.71	289569	1.19689e+06	1.39215e+06	315935	1.10483e+06	865206	1.92394e+06	324953	758462	126409	1.02004e+06	1.3722e+06	191883	509703	865206	1.64213e+06	180955	682385	1
High	Master Protein	A8K129	cDNA FLJ75032, highly similar to Homo sapiens unc-84 homolog B (C. elegans) (UNC84B), mRNA [OS=Homo sapiens]	0	153.157	26	12	130	12	717	80.3	6.81	1526	173.79	12	11	Pf07738				1.033	0.715	0.714	0.863084	0.676533	0.454352	45.41	33.15	36.13	2.0167e+07	1.76267e+07	1.25522e+07	2.09001e+07	1.8703e+07	1.21486e+07	1.57311e+07	6.57498e+06	1.22563e+07	8.80374e+06	1.50222e+07	1.23722e+07	1.26937e+07	8.62845e+06	1.21486e+07	1.34268e+07	3.66137e+06	1.10269e+07	1
High	Master Protein	A8K141	Catenin (Cadherin-associated protein), alpha 3, isoform CRA_a [OS=Homo sapiens]	0	8.015	2	2	17	1	895	99.8	6.16	141	19.09	2	1	Pf01044	29119		CTNNA3	0.617	0.657	1.207	0.00300945	0.429776	0.160069	19.72	24.16	67.77	3.32604e+06	3.94215e+06	6.04444e+06	2.45808e+06	1.33445e+06	3.72846e+06	2.58864e+06	1.61054e+06	5.62293e+06	1.45196e+06	3359674	5957800	1.49292e+06	615635	3.72846e+06	2.20946e+06	896850	5058925	1	Oxidation [K773]
High	Master Protein	A8K169	cDNA FLJ77252, highly similar to Homo sapiens protein tyrosine phosphatase, receptor type, O (PTPRO), transcript variant 1, mRNA [OS=Homo sapiens]	0	77.531	10	10	40	10	1216	138.3	6.01	552	47.67	10	10	Pf00041, Pf00102, Pf00782, Pf13350, Pf14566	5800		PTPRO	1.095	1.137	1.815	0.809844	0.569217	0.00149513	79.03	105.35	121.62	301797	263704	138637	558330	1.35212e+06	5.77563e+06	1.27012e+07	86755.9	1.6922e+06	131747	224740	136650	339102	623787	5.77563e+06	1.08407e+07	48311.3	1.52247e+06	1
High	Master Protein	A8K1E1	cDNA FLJ75589, highly similar to Homo sapiens mutS homolog 3 (E. coli) (MSH3), mRNA [OS=Homo sapiens]	0	4.376	2	2	18	2	1128	126.7	8.09	50	5.42	2	2	Pf00488, Pf01624, Pf05188, Pf05190, Pf05192	4437		MSH3	0.866	0.908	1.118	0.496142	0.994201	0.543039	33.11	44.42	48.34	897508	1.23599e+06	1.29523e+06	764263	883298	332749	627115	1.12059e+06	577256	391801	1.05337e+06	1.27667e+06	464175	407502	332749	535257	624017	519355	1
High	Master Protein	A8K1R1	receptor expression-enhancing protein [OS=Homo sapiens]	0	14.269	15	2	10	2	255	29.3	9.63	36	15.1	2	2	Pf03134	221035		REEP3	1.162	1.037	0.976	0.656124	0.833389	0.877512	21.23	8.38	8.52	728891	232727	698287	704505	725618	846864	740047		698062	318192	198341	688278	427881	334757	846864	631648		628043	1
High	Master Protein	A8K1Z3	cDNA FLJ75002, highly similar to Homo sapiens, neural cell expressed,developmentally down-regulated gene 1 [OS=Homo sapiens]	0	24.9	8	3	18	3	660	71.9	7.83	252	21.72	3	3	Pf00400, Pf02239	121441		NEDD1	1.259	1.505	1.213	0.448181	0.328626	0.447142	17.01	61.22	72.41	267920	307501	403731	590374	344871	376041	236756		871340	116958	262066	397944	358564	159103	376041	202076		783940	1
High	Master Protein	A8K201	cDNA FLJ75605, highly similar to Homo sapiens CGI-115 protein (CGI-115), mRNA [OS=Homo sapiens]	0	11.885	10	3	22	3	259	28.9	5.38	154	3.9	3	3	Pf07890	51018		RRP15	1.012	1.437	1.315	0.936899	0.226809	0.110455	26.14	49.37	64.48	807546	957401	985689	848113	907612	1.2618e+06	641340	1.7657e+06	1.41321e+06	352528	815939	971560	515101	418718	1.2618e+06	547398	983255	1.27146e+06	1
High	Master Protein	A8K237	NADH-cytochrome b5 reductase [OS=Homo sapiens]	0	4.674	4	1	1	1	276	31.5	8.12		2.65		1	Pf00175, Pf00970, Pf08030	51700		CYB5R2	1.079	1.126	1.063	0.99775	0.82997	0.826099	70.76	72.96	33.58	83978.5	100794	253679	99298.9		172292	103578		186516	36660.2	85901	250043	60309.2		172292	88406		167807	1
High	Master Protein	A8K285	cDNA FLJ78239 [OS=Homo sapiens]	0	15.2	4	1	16	1	555	63.4	6.74	224	25.24	1	1	Pf06814	25963		TMEM87A	1.709	0.843	0.493	0.0581499	0.783475	0.0281641	53.83	91.95	31.03	641209	837767	448515	1.09591e+06	1.61589e+06	697982	1.17754e+06	48376	540739	279915	713982	442086	665598	745477	697982	1.00506e+06	26938.9	486500	1
High	Master Protein	A8K2P0	cDNA FLJ75914, highly similar to Homo sapiens leucine rich repeat containing 17, mRNA [OS=Homo sapiens]	0	4.329	3	1	2	1	441	51.7	8.13	0	2.07	1	1	Pf12799, Pf13855	10234		LRRC17	0.01	8.688	100	1e-17	3.73267e-06	1e-17		1.16		100245	86001.6	85334.1					747169		43761.2	73294.4	84110.9					416072		1
High	Master Protein	A8K2S7	cDNA FLJ77865 [OS=Homo sapiens]	0.002	2.996	5	1	2	1	344	38.9	9.01	0	0	1	1	Pf00627	337867		UBAC2	0.749	0.761	0.917	0.303974	0.571429	0.860323	30.4	32.62	52.77	183692	116484	103023	87207.2	61764.4	214325	67328.4		162909	80189.4	99272.6	101547	52965.3	28494.4	214325	57466.4		146568	1
High	Master Protein	A8K330	cDNA FLJ77055, highly similar to Homo sapiens WD repeat domain 75 (WDR75), mRNA [OS=Homo sapiens]	0	62.311	22	12	26	12	812	92.2	5.82	204	17.22	12	12	Pf00400	84128		WDR75	1.022	4.872	1.302	0.967505	1.11596e-06	0.0987726	37.47	116.32	141.09	819076	916728	1.0583e+06	738190	650426	2.94271e+06	468606	9.01867e+06	2.68731e+06	357562	781276	1.04313e+06	448339	300068	2.94271e+06	399966	5.02218e+06	2.41776e+06	1
High	Master Protein	A8K358	cDNA FLJ78536, highly similar to Homo sapiens inactive palmitoyl-protein thioesterase-2i (PPT2) mRNA [OS=Homo sapiens]	0	10.648	9	2	5	2	301	34.1	6.79	81	8.84	2	1	Pf00561, Pf02089, Pf07819, Pf12697	100532746		PPT2-EGFL8	1.194	1.381	1.235	0.57206	0.368332	0.380861	24.72	39.74	37.22	446025	502571	603139	456295	599942	736772	926046		553978	194709	428313	594494	277131	276778	736772	790402		498412	1
High	Master Protein	A8K3E8	cDNA FLJ78154, highly similar to Homo sapiens solute carrier family 39 (zinc transporter), member 4 (SLC39A4), transcript variant 2, mRNA [OS=Homo sapiens]	0	12.706	3	1	2	1	647	68.3	5.5	75	3.12	1	1	Pf02535	55630		SLC39A4		100	100		1e-17	1e-17										359559									306892			1
High	Master Protein	A8K3H8	cDNA FLJ77680, highly similar to Homo sapiens protein phosphatase 2 (formerly 2A), regulatory subunit A (PR 65), alpha isoform (PPP2R1A), mRNA [OS=Homo sapiens]	0	308.601	45	29	400	25	589	65.3	5.11	5290	491.39	29	28	Pf02985, Pf13513, Pf13646	5518		PPP2R1A	0.896	0.784	0.905	0.410221	0.883902	0.50805	43.73	51.55	70.6	5.48978e+07	9.03282e+07	1.03176e+08	6.97373e+07	7.74463e+07	1.06154e+08	8.59249e+07	2.08768e+07	1.04027e+08	2.39652e+07	7.69817e+07	1.01697e+08	4.23549e+07	3.57291e+07	1.06154e+08	7.33389e+07	1.16255e+07	9.35929e+07	1
High	Master Protein	A8K3K1	cDNA FLJ78096, highly similar to Homo sapiens actin, alpha, cardiac muscle (ACTC), mRNA [OS=Homo sapiens]	0	546.682	66	27	1749	2	377	42	5.39	22906	2102.94	27	27	Pf00022	70		ACTC1	0.925	1.308	1.297	0.529297	0.114879	0.00545171	72.51	107.71	119.5	2.075e+08	2.59045e+08	1.97816e+08	2.23417e+08	3.39053e+08	1.41743e+08	1.68847e+08	2.06776e+08	1.18898e+08	9.05827e+07	2.2077e+08	1.9498e+08	1.35692e+08	1.56419e+08	1.41743e+08	1.44115e+08	1.15146e+08	1.06972e+08	1	Oxidation [K52; K86; P245; P324]
High	Master Protein	A8K3N2	Mediator of RNA polymerase II transcription subunit 6 [OS=Homo sapiens]	0.002	2.98	4	1	4	1	246	28.4	9	48	4.83	1	1	Pf04934	10001		MED6	1.683	1.672	0.994	0.248307	0.347466	0.983788	47.38	116.27	102.89	52817.2	54673.9	80349.6	92009.7	66774.3	225837	91435.9	19726.3	312559	23057	46595.5	79197.9	55882.1	30805.7	225837	78042.7	10984.8	281207	1
High	Master Protein	A8K3S0	cDNA FLJ76127, highly similar to Homo sapiens replication factor C (activator 1) 5, 36.5kDa (RFC5), transcript variant 1, mRNA [OS=Homo sapiens]	0	114.036	49	14	92	14	340	38.4	7.2	893	115.69	13	14	Pf00004, Pf03215, Pf05496, Pf06068, Pf08542, Pf13086, Pf13173, Pf13177, Pf13401, Pf13479	5985		RFC5	0.816	0.783	0.924	0.239274	0.923753	0.518739	19.7	28.93	37.34	8.6045e+06	1.07925e+07	1.14374e+07	1.04245e+07	9.63421e+06	7.33531e+06	7.11133e+06	1.05626e+07	8.21233e+06	3.75623e+06	9.19785e+06	1.12734e+07	6.33134e+06	4.44466e+06	7.33531e+06	6.06968e+06	5.88193e+06	7.38859e+06	1	Acetyl [N-Term]
High	Master Protein	A8K3S3	Kinesin-like protein [OS=Homo sapiens]	0	22.427	11	6	15	6	725	81.3	7.83	100	11.48	5	6	Pf00225	11004		KIF2C	0.632	1.02	1.506	0.040002	0.737509	0.0251718	8.71	50.67	67.16	1.65079e+06	1.32574e+06	1.64696e+06	1.23493e+06	1.25214e+06	625634	514558	1.70165e+06	4.14957e+06	720640	1.12986e+06	1.62335e+06	750037	577663	625634	439187	947586	3.73335e+06	1
High	Master Protein	A8K3W7	cDNA FLJ76271, highly similar to Homo sapiens protein O-fucosyltransferase 2 (POFUT2), transcript variant 3, mRNA [OS=Homo sapiens]	0	5.96	7	2	3	2	429	49.9	6.6	0	0	1	2	Pf10250	23275		POFUT2	0.848	0.503	0.574	0.532195	0.156687	0.147965	5.33	8.78	11.43	515028	506953	573554	451560	474769	430092	413878	198696	259296	224832	432048	565333	274255	219030	430092	353254	110647	233287	1
High	Master Protein	A8K3Y5	cDNA FLJ78186 [OS=Homo sapiens]	0	32.208	8	4	13	4	379	43.6	9.57	230	14.13	4	2	Pf08790	55646		LYAR	1.375	0.891	0.705	0.116037	0.969232	0.306145	38.06	36.93	30.16	1.37162e+06	1.86431e+06	1.86724e+06	2.6882e+06	2.21564e+06	1.53334e+06	1.63622e+06	810682	2.44459e+06	598770	1.58885e+06	1.84047e+06	1.63268e+06	1.02216e+06	1.53334e+06	1.39655e+06	451440	2.19938e+06	1
High	Master Protein	A8K491	cDNA FLJ76037, highly similar to Homo sapiens matrilin 3 (MATN3), mRNA [OS=Homo sapiens]	0.001	3.929	4	1	2	1	486	52.8	6.7	0	2.04	1	1	Pf00092, Pf07645, Pf10393, Pf12662, Pf13519, Pf14670	4148		MATN3		100	100		1e-17	1e-17											155078									86357.6		1
High	Master Protein	A8K4A1	cDNA FLJ76790 [OS=Homo sapiens]	0	14.705	4	3	16	3	963	108.1	6.44	133	6.44	3	3	Pf01602, Pf12717, Pf12755	92105		INTS4	1.049	0.857	0.928	0.999302	0.840109	0.934024	37.12	43.44	32.14	784472	820728	998812	941098	1.06322e+06	779746	851369	402999	711683	342456	699460	984494	571576	490507	779746	726664	224416	640297	1
High	Master Protein	A8K4C1	cDNA FLJ77904, highly similar to Homo sapiens ADP-ribosylation factor-like 15, mRNA [OS=Homo sapiens]	0	11.879	9	1	8	1	204	22.8	5.9	218	8.78	1	1	Pf00025, Pf08477, Pf09439, Pf13671	54622		ARL15	0.844	0.789	0.86	0.494108	0.664255	0.74234	12.11	15.73	29.86	235566	222916	268928	253034	198860	184059	185876	77010.5	217560	102835	189979	265073	153680	91742.2	184059	158649	42884.4	195737	1
High	Master Protein	A8K4K9	cDNA FLJ76169 [OS=Homo sapiens]	0	33.367	13	3	36	3	297	34.8	6.81	472	33.56	3	3	Pf13414, Pf13432, Pf14559	9694		EMC2	1.088	0.914	0.917	0.740089	0.847413	0.829258	35.19	50.84	23.64	4.82037e+06	3.65733e+06	2.67161e+06	3.82508e+06	4.21643e+06	2.85527e+06	4.24882e+06	1.03764e+06	3.26381e+06	2.1043e+06	3.11694e+06	2.63332e+06	2323163	1.94521e+06	2.85527e+06	3.62647e+06	577823	2.93644e+06	1
High	Master Protein	A8K4M5	cDNA FLJ76043, highly similar to Homo sapiens cyclin T1 (CCNT1), mRNA [OS=Homo sapiens]	0	14.088	5	2	6	2	726	80.5	8.69	68	8.65	2	2	Pf00134	904		CCNT1	1.492	0.827	0.634	0.174535	0.734528	0.229397	36.21	38.02	20.39	274384	327384	204298	516503	322936	379161	169035	105716	289449	119780	279011	201370	313698	148984	379161	144276	58869.4	260415	1
High	Master Protein	A8K4N2	DNA topoisomerase [OS=Homo sapiens]	0	18.976	5	2	15	2	862	96.6	8.1	218	15.2	2	2	Pf01131, Pf01751	8940		TOP3B	1.15	1.001	0.962	0.682642	0.919915	0.912519	60.52	51.59	52.33	304505	441642	552825	658347	368096	500980	408177		498675	132930	376387	544901	399847	169817	500980	348388		448655	1
High	Master Protein	A8K4T6	cDNA FLJ76282, highly similar to Homo sapiens proteasome (prosome, macropain) 26S subunit, non-ATPase, 5 (PSMD5), mRNA [OS=Homo sapiens]	0	162.928	38	17	162	17	504	56.2	5.57	2385	191.65	17	17	Pf10508	5711		PSMD5	0.999	0.853	0.791	0.973671	0.876146	0.884682	54.84	47.74	44	7.72906e+06	1.36557e+07	1.68204e+07	1.12775e+07	1.29604e+07	1.95725e+07	1.40065e+07	4.8958e+06	1.63572e+07	3.37407e+06	1.1638e+07	1.65793e+07	6.8494e+06	5.97914e+06	1.95725e+07	1.19548e+07	2.7263e+06	1.47165e+07	1
High	Master Protein	A8K4U4	cDNA FLJ77113 [OS=Homo sapiens]	0	4.798	2	2	4	2	837	95.5	6.29	51	3.59	2	2	Pf07923, Pf11882	85369		STRIP1	1.097	0.684	0.624	0.915319	0.469159	0.254122	49.98	24.2	29.42		222081	243816	169050	255306	422331	159225	103609	518344		189267	240321	102673	117783	422331	135902	57696.3	466352	1
High	Master Protein	A8K503	cDNA FLJ76182, highly similar to Homo sapiens ubiquitin-conjugating enzyme E2I (UBC9 homolog, yeast) (UBE2I), transcript variant 1, mRNA [OS=Homo sapiens]	0	67.47	36	6	102	6	158	18	8.87	1172	101.15	6	6	Pf00179, Pf14461	7329		UBE2I	0.817	0.723	0.728	0.258222	0.711518	0.52507	36.47	51.33	42.82	8.76202e+06	1.27168e+07	1.77127e+07	9.83179e+06	8.3479e+06	3.11647e+07	1.29336e+07	2.23311e+06	2.86069e+07	3.825e+06	1.08378e+07	1.74588e+07	5.97134e+06	3.85123e+06	3.11647e+07	1.10391e+07	1.24354e+06	2.57375e+07	1
High	Master Protein	A8K545	cDNA FLJ78016, highly similar to Homo sapiens choroideremia (Rab escort protein 1) (CHM), transcript variant, mRNA [OS=Homo sapiens]	0	12.78	3	1	2	1	653	73.4	4.75	34	3.37	1	1	Pf00996, Pf12831, Pf13450	1121		CHM	1.171	0.861	0.681	0.695925	0.797035	0.361262	53.29	39.16	25.58	109971	272381	291187		155238	329734		91759.5	258823	48007.2	232135	287013		71617.5	329734		51097.6	232862	1
High	Master Protein	A8K5A5	cDNA FLJ75393, highly similar to Homo sapiens PHD finger protein 16 (PHF16), mRNA [OS=Homo sapiens]	0.001	3.361	1	1	2	1	823	93.8	7.05	0	0	1	1	Pf00628, Pf10513, Pf13771, Pf13831, Pf13832, Pf15446	9767		PHF16; JADE3	0.974	1.082	1.179	0.755069	0.91166	0.657744	33.6	61.97	73.71	107408		62512	115466	56628.2	65488.9	68470.7	243796	66778.6	46888.3		61615.9	70128.3	26124.9	65488.9	58441.3	135761	60080.4	1
High	Master Protein	A8K5C5	cDNA FLJ77534, highly similar to Homo sapiens membrane protein, palmitoylated 5 (MAGUK p55 subfamily member 5) (MPP5), mRNA [OS=Homo sapiens]	0	36.267	10	5	26	5	675	77.3	6.07	208	26.49	5	5	Pf00018, Pf00595, Pf00625, Pf02828, Pf07653, Pf09060, Pf13180, Pf14604	64398		MPP5	1.344	2.414	1.875	0.332838	0.0151784	0.00671192	33.27	92.07	85.87	762883	596272	565834	746051	1.11515e+06	1.76247e+06	3.7594e+06	85868.7	809866	333031	508170	557723	453114	514465	1.76247e+06	3.20873e+06	47817.2	728632	1
High	Master Protein	A8K5D5	cDNA FLJ76832, highly similar to Homo sapiens mitochondrial ribosomal protein L19 (MRPL19), mRNA [OS=Homo sapiens]	0	83.966	49	13	120	13	280	32.4	9.57	829	85.01	13	13	Pf01245	9801		MRPL19	0.965	0.678	0.899	0.870723	0.560294	0.690541	53.02	22.87	54.43	1.04069e+07	9.16204e+06	8.14413e+06	1.00835e+07	1.02697e+07	5.3961e+06	1.00794e+07	4.61463e+06	5.64717e+06	4.54307e+06	7.8083e+06	8.02739e+06	6.1242e+06	4.73783e+06	5.3961e+06	8.60299e+06	2.56973e+06	5.08073e+06	1
High	Master Protein	A8K5G2	cDNA FLJ76292, highly similar to Homo sapiens myotubularin related protein 2 (MTMR2), transcript variant 1, mRNA [OS=Homo sapiens]	0	6.425	4	2	4	2	643	73.3	7.4	0	2.51	2	2	Pf02893, Pf06602	8898		MTMR2	0.752	1.402	1.305	0.25864	0.406006	0.378051	34.92	55.95	95.19	278542	397390	490158	337106	218975	251475	411624	46468.1	665650	121595	338673	483132	204741	101022	251475	351331	25876.4	598882	1
High	Master Protein	A8K5H7	cDNA FLJ77542, highly similar to Homo sapiens YME1-like 1 (S. cerevisiae) (YME1L1), transcript variant 3, mRNA [OS=Homo sapiens]	0	49.665	16	7	42	7	716	79.8	8.56	346	37.14	7	6	Pf00004, Pf01434	10730		YME1L1	0.72	0.629	0.823	0.0797905	0.33562	0.736796	24.36	18.45	47.79	3.11682e+06	3.24519e+06	2.69733e+06	2.48275e+06	2.61461e+06	1.14781e+06	2.22306e+06	851218	1.90025e+06	1.36063e+06	2.7657e+06	2.65867e+06	1.5079e+06	1.20623e+06	1.14781e+06	1.89743e+06	474013	1.70965e+06	1
High	Master Protein	A8K5M7	cDNA FLJ76303, highly similar to Homo sapiens armadillo repeat containing, X-linked 2 (ARMCX2), mRNA [OS=Homo sapiens]	0	23.883	5	2	22	2	632	65.7	8.78	454	21.5	2	2	Pf00514, Pf04826, Pf09759	9823		ARMCX2	0.837	0.512	0.691	0.424756	0.125967	0.393737	23.93	13.28	26.77	920782	911391	1.00388e+06	685121	880245	517185	909931	425994	356870	401961	776728	989491	416108	406093	517185	776647	237221	321074	1
High	Master Protein	A8K5S1	cDNA FLJ78650, highly similar to Homo sapiens mucosa associated lymphoid tissue lymphoma translocation gene 1 (MALT1), transcript variant 1, mRNA [OS=Homo sapiens]	0.005	2.201	1	1	1	1	824	92.2	5.73	0		1		Pf00047, Pf00531, Pf00656, Pf07679, Pf13895, Pf13927	10892		MALT1	1.426	1.586	0.932	0.433745	0.348699	0.928213	36.84	7.04	25.87	205847	121406	127174	177207	264020			201686		89861.1	103467	125351	107627	121803			112312		1	Oxidation [K709; P710]
High	Master Protein	A8K5U9	cDNA FLJ75056, highly similar to Homo sapiens phosphatidylinositol binding clathrin assembly protein (PICALM), mRNA [OS=Homo sapiens]	0	35.331	15	5	30	4	652	70.7	7.62	514	40.1	5	5	Pf01417, Pf07651	8301		PICALM	1.75	1.185	0.834	0.00213768	0.415197	0.786316	39.92	116.61	60.84	4.70373e+06	3.11081e+06	2.00631e+06	6.91291e+06	5.58354e+06	1.97063e+06	5.33318e+06	377118	908556	2.05338e+06	2.65117e+06	1.97755e+06	4.19856e+06	2.57591e+06	1.97063e+06	4.552e+06	210003	817423	1
High	Master Protein	A8K5Y2	cDNA FLJ77228, highly similar to Homo sapiens amphiphysin (Stiff-Man syndrome with breast cancer 128kDa autoantigen) (AMPH), transcript variant 1, mRNA [OS=Homo sapiens]	0.008	1.79	2	1	6	1	695	76.2	4.64	0		1		Pf00018, Pf03114, Pf14604	273		AMPH	0.577	1.117	1.934	0.000916653	0.36624	9.17518e-05	21.42	85.36	100.05	4.07666e+06	4.58046e+06	3.334e+06	2.35341e+06	871613	3.37378e+06	7.17219e+06	548149	4.55159e+06	1.77963e+06	3.90367e+06	3.28621e+06	1.42934e+06	402111	3.37378e+06	6.12163e+06	305245	4.09504e+06	1	Oxidation [P302; P304; P305; P307; K308; P311; K313]
High	Master Protein	A8K5Y7	cDNA FLJ78655, highly similar to Homo sapiens exportin 5 (XPO5), mRNA [OS=Homo sapiens]	0	93.706	14	14	95	14	1204	136.2	5.9	857	93.13	14	13	Pf08389	57510		XPO5	1.044	1.007	0.923	0.757324	0.45786	0.594019	43.63	53.41	42.73	6.12183e+06	7.76187e+06	9.62187e+06	7.00865e+06	7.74773e+06	1.14433e+07	8.28016e+06	6.04225e+06	1.06915e+07	2.67244e+06	6.61501e+06	9.48395e+06	4.2567e+06	3.57434e+06	1.14433e+07	7.06731e+06	3.36471e+06	9.61909e+06	1
High	Master Protein	A8K651	cDNA FLJ75700, highly similar to Homo sapiens complement component 1, q subcomponent binding protein (C1QBP), nuclear gene encoding mitochondrial protein, mRNA [OS=Homo sapiens]	0	80.395	32	5	106	5	282	31.4	4.84	2738	193.8	5	5	Pf02330	708		C1QBP	0.927	0.457	0.417	0.540685	0.0500202	0.000101666	52.93	19.53	23.98	2.21008e+08	1.83425e+08	1.02207e+08	1.40767e+08	2.55486e+08	3.82666e+06	5.19378e+06	2.99753e+08	4.54375e+06	9.64795e+07	1.56323e+08	1.00742e+08	8.54946e+07	1.17866e+08	3.82666e+06	4.43302e+06	1.66922e+08	4.08799e+06	1
High	Master Protein	A8K690	cDNA FLJ76863, highly similar to Homo sapiens stress-induced-phosphoprotein 1 (Hsp70/Hsp90-organizing protein) (STIP1), mRNA [OS=Homo sapiens]	0	444.36	67	38	581	38	543	62.6	6.8	6506	711.38	35	38	Pf00515, Pf12895, Pf13414, Pf13424, Pf13432	10963		STIP1	1.049	0.735	0.76	0.871238	0.71511	0.719147	58.6	50.84	58.44	9.51773e+07	1.23805e+08	1.54579e+08	1.28916e+08	1.16724e+08	1.49857e+08	1.14965e+08	5.51513e+06	1.71641e+08	4.1549e+07	1.05512e+08	1.52363e+08	7.8297e+07	5.38495e+07	1.49857e+08	9.8125e+07	3.07118e+06	1.54424e+08	1	Acetyl [N-Term]
High	Master Protein	A8K6K2	cDNA FLJ75877, highly similar to Homo sapiens 5'-nucleotidase, cytosolic II (NT5C2), mRNA [OS=Homo sapiens]	0	45.829	22	8	49	8	561	64.9	6.14	457	48.82	8	8	Pf05761	22978		NT5C2	0.833	0.78	0.963	0.329634	0.701772	0.685595	32.5	37.14	68.9	1.71265e+06	2.59746e+06	3.00125e+06	1.86485e+06	2.11835e+06	2.24165e+06	1.61169e+06	442188	2.17398e+06	747646	2.21367e+06	2.95822e+06	1.13262e+06	977279	2.24165e+06	1.37562e+06	246239	1.95592e+06	1
High	Master Protein	A8K6N9	cDNA FLJ77153, highly similar to Homo sapiens calcium/calmodulin-dependent protein kinase (CaM kinase) II gamma (CAMK2G), transcript variant 3, mRNA [OS=Homo sapiens]	0	41.638	17	7	99	3	518	58.3	7.18	687	61.77	7	7	Pf00069, Pf07714, Pf08332, Pf12680, Pf13474, Pf14534	818		CAMK2G	1.173	0.763	0.611	0.623465	0.614997	0.192958	26.14	54.31	26.16	469790	574214	513417	690588	539914	1.14564e+06	500453	222570	899315	205084	489370	506058	419428	249084	1.14564e+06	427149	123941	809109	1
High	Master Protein	A8K6Q4	cDNA FLJ76888, highly similar to Homo sapiens RNA binding motif protein 6 (RBM6), mRNA [OS=Homo sapiens]	0	5.107	1	2	6	1	1123	128.5	6.32	42	3.9	2	2	Pf01585, Pf14259	10180		RBM6	1.201	0.734	0.565	0.742846	0.525003	0.171494	19.66	24.42	8.47	260518	180800	172641	207374	234869	238810	132640	108868	269445	113727	154086	170167	125949	108355	238810	113211	60624.9	242419	1
High	Master Protein	A8K6Q8	cDNA FLJ75881, highly similar to Homo sapiens transferrin receptor (p90, CD71) (TFRC), mRNA [OS=Homo sapiens]	0	66.964	19	12	55	12	760	84.8	6.61	397	47.14	12	12	Pf02225, Pf04253, Pf04389	7037		TFRC	0.896	0.469	0.494	0.501578	0.0774753	0.00457103	42.43	15.45	14.84	8.95215e+06	5.0107e+06	2.23103e+06	5.33583e+06	4.83823e+06	823254	2.41761e+06	798929	2.5887e+06	3.908e+06	4.27034e+06	2.19905e+06	3.24072e+06	2.23207e+06	823254	2.06349e+06	444895	2.32904e+06	1
High	Master Protein	A8K6Q9	cDNA FLJ75882, highly similar to Homo sapiens spastic paraplegia 20, spartin (Troyer syndrome) (SPG20), mRNA [OS=Homo sapiens]	0	54.254	10	7	52	7	666	72.8	6	579	53.32	7	7	Pf04212, Pf06911	23111		SPG20; SPART	0.95	0.754	0.638	0.725989	0.703658	0.1342	29.81	42.15	34.4	3.22396e+06	3.68256e+06	4.2609e+06	5.00231e+06	4.52131e+06	3.77724e+06	2.76409e+06	1.86234e+06	4.4073e+06	1.4074e+06	3.13844e+06	4.19982e+06	3.03816e+06	2.08586e+06	3.77724e+06	2.35921e+06	1.03707e+06	3.96523e+06	1
High	Master Protein	A8K6U7	cDNA FLJ78252, highly similar to Homo sapiens heterogeneous nuclear ribonucleoprotein U-like 1 (HNRPUL1), transcript variant 1, mRNA [OS=Homo sapiens]	0	282.361	36	27	315	27	856	95.6	6.92	3431	378.55	27	27	Pf00622, Pf02037, Pf13671	11100		HNRNPUL1	1.189	1.043	0.902	0.359426	0.415713	0.528109	36.02	43.82	37.31	3.36472e+07	3.66121e+07	3.97006e+07	4.06563e+07	3.76272e+07	5.0457e+07	4.21909e+07	3.49499e+07	4.82e+07	1.46885e+07	3.12025e+07	3.91316e+07	2.46926e+07	1.7359e+07	5.0457e+07	3.60109e+07	1.94623e+07	4.33653e+07	1
High	Master Protein	A8K6V6	N-acetylglucosamine-6-sulfatase [OS=Homo sapiens]	0	85.394	22	11	89	11	552	62.1	8.4	1348	95.64	11	11	Pf00884, Pf01663	2799		GNS	0.883	0.976	0.882	0.488978	0.550799	0.677852	31.73	67.16	57.8	1.3338e+07	1.49631e+07	1.26038e+07	9.63495e+06	1.22172e+07	1.77943e+07	1.45199e+07	747738	1.23012e+07	5.8226e+06	1.27522e+07	1.24231e+07	5.85179e+06	5.63631e+06	1.77943e+07	1.2393e+07	416389	1.10673e+07	1
High	Master Protein	A8K6X9	cDNA FLJ76427, highly similar to Homo sapiens SH2 domain binding protein 1 (tetratricopeptide repeat containing) (SH2BP1), mRNA [OS=Homo sapiens]	0	79.023	11	11	76	11	1173	133.4	6.77	829	94.48	11	11	Pf08424, Pf13414, Pf13424, Pf13432, Pf14559	9646		CTR9	1.018	0.668	0.764	0.884218	0.538451	0.694912	27.14	20.89	33.57	9.6085e+06	9.03497e+06	1.01371e+07	9.67991e+06	1.01734e+07	8.53073e+06	2.493e+07	5.23521e+06	7.85017e+06	4.19452e+06	7.7e+06	9.99183e+06	5.87909e+06	4.69341e+06	8.53073e+06	2.12784e+07	2.9153e+06	7.06276e+06	1
High	Master Protein	A8K719	cDNA FLJ76413, highly similar to Homo sapiens core-binding factor, beta subunit (CBFB), transcript variant 1, mRNA [OS=Homo sapiens]	0	26.028	21	3	14	3	187	21.9	5.8	497	25.98	3	3	Pf02312	865		CBFB	0.795	0.759	1.086	0.307978	0.662907	0.330129	39.13	51.72	76.5	829076	1.79376e+06	1.26135e+06	1.08201e+06	785540	2.13762e+06	1.41026e+06	227115	2.43152e+06	361927	1.52872e+06	1.24327e+06	657162	362401	2.13762e+06	1.20369e+06	126472	2.18763e+06	1
High	Master Protein	A8K7A0	DNA primase large subunit [OS=Homo sapiens]	0.002	2.545	5	2	7	2	509	58.8	7.91	0	0	2	2	Pf04104	5558		PRIM2	0.674	0.736	1.237	0.128508	0.583072	0.48025	30.77	26.82	40.19	312578	306543	392935	229120	215181	331538	258331	244119	338004	136454	261250	387302	139156	99271.6	331538	220491	135941	304101	1	Oxidation [P171]
High	Master Protein	A8K7A1	cDNA FLJ77346, highly similar to Homo sapiens DEAD (Asp-Glu-Ala-Asp) box polypeptide 49 (DDX49), mRNA [OS=Homo sapiens]	0.001	3.515	4	1	2	1	483	54.3	8.98	16	2.12	1	1	Pf00270, Pf00271, Pf03592, Pf13863	54555		DDX49	0.01	1.583	100	1e-17	0.396185	1e-17		49.89		38761.9	91456.5	108355					157564	71658.1	16921.2	77943.2	106802					87741.8	64470.4	1
High	Master Protein	A8K7A4	Methionine adenosyltransferase 2 subunit beta [OS=Homo sapiens]	0	102.191	40	11	114	1	323	36.4	6.8	1833	147.44	11	10	Pf00106, Pf01073, Pf01370, Pf02719, Pf04321, Pf07993, Pf13460	27430		MAT2B	0.927	0.559	0.603	0.695259	0.192944	0.184408	41.15	28.8	33.52	605551	811227	1.19841e+06	751940	609384	1.02303e+06	453118	170974	1.19803e+06	264349	691364	1.18123e+06	456690	281133	1.02303e+06	386747	95209.1	1.07786e+06	1
High	Master Protein	A8K7F6	cDNA FLJ78244, highly similar to Homo sapiens eukaryotic translation initiation factor 4A, isoform 1 (EIF4A1), mRNA [OS=Homo sapiens]	0	422.249	63	28	866	13	406	46.1	5.48	13416	1153.74	27	28	Pf00270, Pf00271, Pf04851	1973		EIF4A1	0.943	0.977	1.017	0.613293	0.55329	0.177041	31.56	42.03	42	2.83531e+08	3.41341e+08	3.93708e+08	3.23267e+08	3.12201e+08	3.69039e+08	3.25683e+08	3.64677e+08	3.53516e+08	1.23773e+08	2.90906e+08	3.88064e+08	1.96336e+08	1.44031e+08	3.69039e+08	2.77978e+08	2.03076e+08	3.18057e+08	1
High	Master Protein	A8K7F7	cDNA FLJ76913, highly similar to Homo sapiens F-box protein 7 (FBXO7), mRNA [OS=Homo sapiens]	0	7.146	3	1	12	1	522	58.5	6.55	62	0	1	1	Pf11566, Pf12937	25793		FBXO7	1.047	1.183	1.13	0.971558	0.689895	0.655151	31.58	16.29	43.63	191713	230741	251431	207199	200753	403107	270110	226835	303011	83690.9	196648	247827	125842	92615.6	403107	230545	126317	272618	1
High	Master Protein	A8K7G2	cDNA FLJ75762, highly similar to Homo sapiens protease, serine, 25 (PRSS25), nuclear gene encodingmitochondrial protein, transcript variant 1, mRNA [OS=Homo sapiens]	0	20.268	16	5	25	5	458	48.8	9.96	163	27.57	5	4	Pf00089, Pf00595, Pf04495, Pf10459, Pf13180, Pf13365	27429		HTRA2	1.203	1.267	0.943	0.356063	0.280382	0.754308	45.56	79.71	78.13	2.76479e+06	2.78735e+06	2.26929e+06	3.20409e+06	3.03659e+06	3.02656e+06	4.03971e+06	335141	2.73966e+06	1.20695e+06	2.3755e+06	2.23676e+06	1.946e+06	1.4009e+06	3.02656e+06	3.44799e+06	186628	2.46486e+06	1
High	Master Protein	A8K7Q1	cDNA FLJ77770, highly similar to Homo sapiens nucleobindin 1 (NUCB1), mRNA [OS=Homo sapiens]	0	50.974	31	10	52	10	461	53.9	5.25	525	51.16	9	9	Pf13499	4924		NUCB1	0.969	0.709	0.888	0.902132	0.673178	0.741198	39.86	40.22	51.59	1.15275e+07	7.98223e+06	4.38066e+06	8.72391e+06	7.98317e+06	5.44632e+06	8.79516e+06	1.8656e+06	5.70482e+06	5.03225e+06	6.80281e+06	4.31786e+06	5.29847e+06	3.68296e+06	5.44632e+06	7.50688e+06	1.03889e+06	5.13259e+06	1
High	Master Protein	A8K7T4	cDNA FLJ75774, highly similar to Homo sapiens lectin, mannose-binding 2 (LMAN2), mRNA [OS=Homo sapiens]	0	100.932	42	11	134	11	356	40.2	6.95	1664	183.47	11	11	Pf03388	10960		LMAN2	1.344	0.729	0.651	0.118078	0.694368	0.233781	56.27	39.8	29.95	2.64029e+07	2.83301e+07	2.21065e+07	3.40125e+07	4.59852e+07	2.2612e+07	2.48488e+07	1.40509e+07	1.82857e+07	1.1526e+07	2.41442e+07	2.17896e+07	2.06575e+07	2.12148e+07	2.2612e+07	2.1209e+07	7.82443e+06	1.64515e+07	1
High	Master Protein	A8K7X9	cDNA FLJ76922, highly similar to Homo sapiens zinc finger protein 272 (ZNF272), mRNA [OS=Homo sapiens]	0	9.484	6	2	4	2	562	63.7	7.06	27	6.24	2	2	Pf00096, Pf01352, Pf13465	10794		ZNF460	1.471	1.217	0.72	0.228297	0.611096	0.475896	46.06	64.19	41.12	297975		323397	332250		627871	377892	121989	541051	130079		318761	201792		627871	322540	67931.2	486781	1
High	Master Protein	A8K806	cDNA FLJ77705 [OS=Homo sapiens]	0	49.046	20	8	15	1	610	67.9	9.69	159	16.42	7	8	Pf00400, Pf08149	9277		WDR46	0.787	1.06	1.261	0.364209	0.794148	0.450323	15.9	62.62	47.1	694921	777482	655276	225865	462789	90027.8	432470	4.94931e+06	98371.1	303363	662605	645883	137179	213503	90027.8	369123	2.75609e+06	88504	1	Acetyl [N-Term]
High	Master Protein	A8K818	cDNA FLJ75784, highly similar to Homo sapiens CD3E antigen, epsilon polypeptide associated protein (CD3EAP), mRNA [OS=Homo sapiens]	0	19.7	7	2	20	2	510	54.9	8.19	253	21.2	2	2	Pf08208	10849		CD3EAP	1.222	1.165	0.988	0.535571	0.629794	0.817263	26.64	34.98	37.01	597217	622193	395342	776668	584750	901304	552311		956634	260711	530260	389675	471709	269769	901304	471411		860679	1
High	Master Protein	A8K841	cDNA FLJ77997, highly similar to Homo sapiens mucolipin 3 (MCOLN3), mRNA [OS=Homo sapiens]	0.002	2.731	1	1	6	1	553	64.2	6.25	123		1		Pf00520, Pf08016	55283		MCOLN3	0.92	0.373	0.474	0.709849	0.0453233	0.0390107	45.62	4.78	14.11	569245	439960	359242	404576	551801	116140	164114	261552	110560	248500	374954	354093	245719	254568	116140	140076	145649	99470.7	1
High	Master Protein	A8K865	cDNA FLJ75789, highly similar to Homo sapiens synaptophysin-like 1 (SYPL1), transcript variant 1, mRNA [OS=Homo sapiens]	0	16.874	20	3	34	3	259	28.5	7.99	407	40	3	3	Pf01284	6856		SYPL1	0.886	0.33	0.377	0.522243	0.00502976	3.83439e-05	39.3	6.87	9.7	6.72528e+06	5.64739e+06	4.44309e+06	5.33519e+06	6.83526e+06	1908955	2.63685e+06	727473	1.48011e+06	2.93587e+06	4.81296e+06	4.3794e+06	3.24033e+06	3.15338e+06	1908955	2.25061e+06	405104	1.33165e+06	1
High	Master Protein	A8K874	cDNA FLJ77588, highly similar to Homo sapiens MAK10 homolog, amino-acid N-acetyltransferase subunit, (S. cerevisiae) (MAK10), mRNA [OS=Homo sapiens]	0	8.329	4	3	14	3	725	83.6	7.05	76	7.34	3	3	Pf04112	60560		NAA35	1.475	1.283	0.918	0.0691423	0.290322	0.879727	44.22	84.07	66.82	1.53975e+06	1.87966e+06	2.21576e+06	1.87878e+06	2.12049e+06	3.13156e+06	3.37542e+06	585878	2.71376e+06	672165	1.60193e+06	2.184e+06	1.14107e+06	978268	3.13156e+06	2.881e+06	326255	2.44156e+06	1
High	Master Protein	A8K883	cDNA FLJ77590, highly similar to Homo sapiens leucine rich repeat containing 1, mRNA [OS=Homo sapiens]	0	21.268	9	3	7	2	524	59.2	5.02	123	5.13	3	3	Pf12799, Pf13855	55227		LRRC1	2.063	1.563	0.782	0.020223	0.338468	0.553146	28.36	74.65	52.32	233538	186937	144796	385582	346435	389564	512569		161124	101949	159316	142721	234183	159825	389564	437489		144962	1
High	Master Protein	A8K8F9	Phosphoinositide phospholipase C [OS=Homo sapiens]	0.002	2.732	1	1	6	1	756	85.6	6.7	0	1.71	1	1	Pf00168, Pf00169, Pf00387, Pf00388, Pf09279, Pf14788	5333		PLCD1																												1
High	Master Protein	A8K8K1	cDNA FLJ76936, highly similar to Homo sapiens RNA terminal phosphate cyclase domain 1 (RTCD1), mRNA [OS=Homo sapiens]	0	15.944	9	3	8	3	366	39.3	8.05	105	8.43	3	3	Pf01137, Pf05189	8634		RTCA	1.16	1.206	1.071	0.616489	0.471805	0.511728	30.23	58.97	47.06	888633	1.04716e+06	1.29041e+06	1.01796e+06	1.28975e+06	1.06102e+06	1.63634e+06	1.18849e+06	473788	387927	892434	1.27191e+06	618256	595012	1.06102e+06	1.39665e+06	661827	426265	1
High	Master Protein	A8K8N7	phosphoribosylformylglycinamidine synthase (FGAR amidotransferase), isoform CRA_b [OS=Homo sapiens]	0	267.239	32	29	273	29	1338	144.6	5.76	3749	355.42	29	28	Pf00586, Pf02769, Pf13507	5198		PFAS	0.806	0.813	1.011	0.2302	0.980109	0.207648	34.16	65.38	83.09	1.77569e+07	2.66189e+07	3.48646e+07	1.88822e+07	1.75497e+07	3.20801e+07	2.37118e+07	4.15978e+06	3.46063e+07	7.75164e+06	2.26858e+07	3.43648e+07	1.14681e+07	8.0964e+06	3.20801e+07	2.02386e+07	2.31643e+06	3.11351e+07	1
High	Master Protein	A8K8X0	cDNA FLJ75187, highly similar to Homo sapiens nap1 P120 [OS=Homo sapiens]	0	35.384	9	6	15	6	972	112.1	6.7	107	16.61	5	6	Pf09797	80018		NAA25	0.969	0.702	0.736	0.861347	0.51436	0.499646	43.78	29.05	33.96	1.12661e+06	1.35232e+06	1.45495e+06	1.4468e+06	468200	781896	1.30395e+06	23549.4	1.0966e+06	491815	1.15251e+06	1.4341e+06	878715	216000	781896	1.11295e+06	13113.8	986606	1
High	Master Protein	A8K8X5	cDNA FLJ76447, highly similar to Homo sapiens cell division cycle associated 7-like (CDCA7L), mRNA [OS=Homo sapiens]	0	12.686	7	4	8	4	454	52.2	5.74	88	2.06	4	4	Pf10497	55536		CDCA7L	1.55	6.373	4	0.356815	0.000133298	7.03479e-05	54.01	4.06	54.99	149948	36236.4		38369.5	79280.5			1.74847e+06	95766.8	65458.8	30882.2		23303.7	36575.3			973662	86160.9	1
High	Master Protein	A8K8X9	cDNA FLJ32106 fis, clone OCBBF2001408, highly similar to H.sapiens thioesterase II [OS=Homo sapiens]	0	9.41	12	1	4	1	188	20.8	9.79	20	2.07	1	1	Pf13622	10005		ACOT8	1.506	1.432	0.951	0.31358	0.436493	0.961035	38.08	64.93	51.5	167644	174902	132008	252413	195711	409848	428414	134910	240026	73183.7	149059	130116	153303	90289.6	409848	365662	75126.6	215950	1
High	Master Protein	A8K8Z3	cDNA FLJ77613, highly similar to Homo sapiens tousled-like kinase 1 (TLK1), mRNA [OS=Homo sapiens]	0.005	2.23	1	1	5	1	766	86.6	8.72	26	0	1	1	Pf00069, Pf07714	9874		TLK1	0.993	0.96	0.947	0.794515	0.942002	0.899446	42.86	40.07	8.07	70675.4	145105	205225	144138	117580	147755	139372	104592	139923	30852.8	123665	202283	87542.2	54244.6	147755	118958	58243.7	125888	1
High	Master Protein	A8K916	AP complex subunit beta [OS=Homo sapiens]	0	192.44	33	30	336	14	951	105.6	5.31	3599	312.18	29	30	Pf01602, Pf02883, Pf09066, Pf12717, Pf13646	163		AP2B1	0.961	0.559	0.654	0.699308	0.199454	0.233318	38.79	28.71	39.66	4.98527e+07	5.16826e+07	5.41403e+07	4.94088e+07	5.85205e+07	3.90306e+07	5.70738e+07	9.06541e+06	3.76329e+07	2.17628e+07	4.40462e+07	5.33643e+07	3.00084e+07	2.69979e+07	3.90306e+07	4.87138e+07	5.0482e+06	3.38582e+07	1
High	Master Protein	A8K940	cDNA FLJ77630, highly similar to Homo sapiens BPY2 interacting protein 1, mRNA [OS=Homo sapiens]	0	40.129	8	6	39	6	1059	112.2	7.3	344	36.34	6	6		55201		MAP1S	1.092	1.068	0.878	0.703065	0.459594	0.879828	27.26	63.85	64.15	3.2793e+06	3.63396e+06	4.45641e+06	3.98788e+06	3.54902e+06	5.25184e+06	5.34851e+06	1.10917e+06	4.41611e+06	1.43156e+06	3.09702e+06	4.39253e+06	2.42204e+06	1.63731e+06	5.25184e+06	4.56507e+06	617659	3.97315e+06	1
High	Master Protein	A8K942	cDNA FLJ76454, highly similar to Homo sapiens ring finger protein 184 (RNF184), mRNA [OS=Homo sapiens]	0.001	3.86	2	1	9	1	577	62.5	7.94	0	3.72	1	1		55167		MSL2	1.07	0.999	0.933	0.913487	0.933997	0.917025	29	97.84	75.1	349921	264472	281477	301263	229007	416060	281102	89360.7	484937	152756	225395	277442	182972	105650	416060	239927	49761.8	436295	1
High	Master Protein	A8K946	mRNA cap guanine-N7 methyltransferase [OS=Homo sapiens]	0	76.536	24	9	79	9	504	57.7	7.69	1015	64.45	8	9	Pf03291	8731		RNMT	1.087	0.872	0.769	0.587249	0.782375	0.676926	20.62	49.62	32.23	6.83171e+06	7.47907e+06	8.37745e+06	7.58806e+06	8.28685e+06	7.26112e+06	9.11586e+06	3.20039e+06	6.77494e+06	2.98233e+06	6.374e+06	8.25737e+06	4.60861e+06	3.82306e+06	7.26112e+06	7.7806e+06	1.78218e+06	6.09538e+06	1
High	Master Protein	A8K948	cDNA FLJ78298 [OS=Homo sapiens]	0	8.283	7	3	8	3	496	56.3	8.46	19	1.94	3	3	Pf01612	55218		EXD2	1.148	0.975	0.91	0.682488	0.922928	0.95356	15.46	44.87	28.1	1.15918e+06	957740	937391	1.07343e+06	1.28089e+06	376977	1.25215e+06	377410	392529	506034	816228	923954	651948	590928	376977	1.06874e+06	210166	353156	1
High	Master Protein	A8K964	cDNA FLJ75071, highly similar to Homo sapiens pinin, desmosome associated protein (PNN), mRNA [OS=Homo sapiens]	0	118.096	20	14	91	14	717	81.5	7.37	1093	99.84	14	14	Pf04696, Pf04697	5411		PNN	0.915	2.217	1.528	0.657337	0.000621725	0.000426819	36.86	87.45	88.84	9.8467e+06	6.57403e+06	8.01485e+06	7.00322e+06	4.19802e+06	1.04636e+07	4.94183e+06	3.51521e+07	9.06941e+06	4.29851e+06	5.60268e+06	7.89997e+06	4.2534e+06	1.93672e+06	1.04636e+07	4.21797e+06	1.9575e+07	8.1597e+06	1
High	Master Protein	A8K9D2	mitochondrial ribosomal protein L18, isoform CRA_b [OS=Homo sapiens]	0	8.598	11	2	22	2	179	20.4	9.32	121	22.48	2	2	Pf00861	29074		MRPL18	0.919	0.665	0.866	0.575415	0.45156	0.936719	30.53	31.76	39.58	5.21282e+06	3.94128e+06	3.19506e+06	3.70921e+06	4.14103e+06	2.10151e+06	4.04485e+06	1.24299e+06	2.62954e+06	2.27562e+06	3.35893e+06	3.14926e+06	2.25279e+06	1.91042e+06	2.10151e+06	3.45237e+06	692179	2.36578e+06	1
High	Master Protein	A8K9F5	cDNA FLJ77771, highly similar to Homo sapiens replication initiator 1, mRNA [OS=Homo sapiens]	0	14.847	7	3	10	3	567	63.6	9.98	73	4.51	3	3	Pf00096, Pf13465	29803		REPIN1	1.173	1.671	1.124	0.602998	0.118548	0.273697	46.64	67.1	35.98	925010	754526	814339	1.15933e+06	594688	1.49168e+06	694261		1.83494e+06	403806	643040	802666	704118	274354	1.49168e+06	592568		1.65089e+06	1
High	Master Protein	A8K9J6	cDNA FLJ78024 [OS=Homo sapiens]	0	145.262	30	8	207	8	388	41.7	4.81	3782	280.26	8	8	Pf00047, Pf07654, Pf07679, Pf08205, Pf13895, Pf13927	80381		CD276	0.797	0.144	0.229	0.119979	5.25372e-09	1.05271e-12	65.83	2.23	4.69	7.75975e+07	6.35666e+07	3.7046e+07	6.07022e+07	5.66865e+07	8.62579e+06	1.33514e+07	1.53771e+06	1.37243e+07	3.38746e+07	5.41743e+07	3.6515e+07	3.68675e+07	2.61518e+07	8.62579e+06	1.13957e+07	856297	1.23477e+07	1
High	Master Protein	A8K9K8	rRNA adenine N(6)-methyltransferase [OS=Homo sapiens]	0	28.53	21	5	25	5	313	35.2	9.91	179	20.41	5	5	Pf00398, Pf08241, Pf08242, Pf12847, Pf13659	27292		DIMT1	1.139	1.212	1.137	0.535651	0.350988	0.239219	26.77	59.37	49.56	2.06176e+06	2.63223e+06	2.70377e+06	2.62552e+06	2.80264e+06	2.57052e+06	1.6656e+06	4.33698e+06	2.70507e+06	900049	2.2433e+06	2.66502e+06	1.59461e+06	1.29297e+06	2.57052e+06	1.42162e+06	2.41511e+06	2.43374e+06	1
High	Master Protein	A8K9U1	cDNA FLJ76468, highly similar to Homo sapiens cullin 7 (CUL7), mRNA [OS=Homo sapiens]	0	18.234	5	6	16	6	1698	191	5.96	71	4.2	6	6	Pf00888, Pf03256, Pf11515	9820		CUL7	1.131	0.97	0.722	0.691601	0.835437	0.444038	43.37	54.15	22.76	617812	1.22867e+06	1.14064e+06	1.1544e+06	1.24778e+06	1.05737e+06	1.54831e+06	748023	1.29649e+06	269701	1.04713e+06	1.12429e+06	701126	575654	1.05737e+06	1.32152e+06	416547	1.16644e+06	1
High	Master Protein	A8K9W7	cDNA FLJ77440, highly similar to Homo sapiens general transcription factor II, i (GTF2I), transcript variant 2, mRNA [OS=Homo sapiens]	0	469.444	46	51	728	51	978	110.1	6.89	7242	877.66	51	51	Pf02946	2969		GTF2I	0.967	0.632	0.676	0.728157	0.384442	0.292218	41.92	22.1	31.05	1.44111e+08	1.42009e+08	1.46597e+08	1.75903e+08	1.68362e+08	1.23728e+08	9.53954e+07	5.539e+07	1.20564e+08	6.29104e+07	1.21027e+08	1.44495e+08	1.06835e+08	7.76722e+07	1.23728e+08	8.14222e+07	3.08447e+07	1.08471e+08	1
High	Master Protein	A8K9X0	Protein YIPF [OS=Homo sapiens]	0	8.006	8	2	12	2	236	26.2	6.18	70	9.06	2	2	Pf04893	286451		YIPF6	1.29	0.949	0.685	0.426701	0.946711	0.326587	25.38	37.09	14.69	1.02188e+06	826598	591860	1.09765e+06	1.28343e+06	805533	1.09396e+06	44406.7	723477	446094	704463	583376	666657	592098	805533	933724	24728.5	650909	1
High	Master Protein	A8KA16	cDNA FLJ77243, highly similar to Homo sapiens steroid sensitive gene 1 (URB), transcript variant 1, mRNA [OS=Homo sapiens]	0	29.258	5	4	8	4	950	108.1	9.69	144	7.57	4	4	Pf13778	151887		CCDC80	0.924	0.897	1.913	0.671141	0.892937	0.0568923	25.11	40.18	101.93	81472.3	577822	294717	148229	115626	177510	223409	3.11838e+06	282061	35566.2	492446	290493	90026.6	53342.8	177510	190685	1.73652e+06	253769	1
High	Master Protein	A8KA19	cDNA FLJ75831, highly similar to Homo sapiens exportin, tRNA (nuclear export receptor for tRNAs) (XPOT), mRNA [OS=Homo sapiens]	0	56.965	14	10	39	10	962	109.8	5.39	372	36.92	10	10	Pf08389	11260		XPOT	1.105	0.897	0.87	0.656287	0.873832	0.949636	52.41	40.49	35.16	2.31296e+06	3.94965e+06	4.24292e+06	3.43893e+06	4.04393e+06	4.29119e+06	2.95084e+06	3.1567e+06	4.31913e+06	1.00971e+06	3.36607e+06	4.1821e+06	2.08863e+06	1.86563e+06	4.29119e+06	2.51861e+06	1.75785e+06	3.8859e+06	1
High	Master Protein	A8KA74	cDNA FLJ76065 [OS=Homo sapiens]	0	28.49	6	5	10	5	857	97.6	7.69	192	7.54	5	5	Pf04147	8602		NOP14	1.168	1.591	1.334	0.631779	0.249565	0.242181	12.05	23.17	31.43	291512	233295	585450	553595	659257	254481	582664	2.32312e+06	745670	127258	198824	577058	336226	304142	254481	497317	1.29366e+06	670875	1
High	Master Protein	A8KA83	cDNA FLJ78586, highly similar to Homo sapiens VAMP (vesicle-associated membrane protein)-associated protein A, 33kDa (VAPA), mRNA [OS=Homo sapiens]	0	148.543	57	13	273	12	242	27.3	8.62	3285	317.68	13	13	Pf00635	9218		VAPA	1.039	0.775	0.722	0.948341	0.853799	0.532978	78.49	61.88	39.82	5.22957e+07	4.39844e+07	2.95957e+07	4.51363e+07	4.70715e+07	1.83838e+07	3.70039e+07	3.34767e+06	2.88672e+07	2.28293e+07	3.74855e+07	2.91715e+07	2.74135e+07	2.1716e+07	1.83838e+07	3.15837e+07	1.8642e+06	2.59717e+07	1
High	Master Protein	A8KAH1	cDNA FLJ75839, highly similar to Homo sapiens phosphatidylserine synthase 1 (PTDSS1), mRNA [OS=Homo sapiens]	0	12.588	7	2	12	2	473	55.4	8.38	62	4.89	2	2	Pf03034	9791		PTDSS1	1.215	0.852	0.944	0.554716	0.799617	0.979948	43.58	16.71	42.47	649337	565401	457006	744271	492458	354091	517202		389713	283463	481860	450455	452033	227191	354091	441444		350623	1
High	Master Protein	A8KAH7	cDNA FLJ75444, highly similar to Homo sapiens protein kinase, cAMP-dependent, regulatory, type II, alpha (PRKAR2A), mRNA [OS=Homo sapiens]	0	160.622	42	15	130	12	404	45.5	5.07	1671	158.95	15	15	Pf00027, Pf02197, Pf05758	5576		PRKAR2A	1.567	1.549	0.789	0.0166052	0.031867	0.919125	38.38	93.52	56.17	1.43084e+07	1.53843e+07	1.19571e+07	2.17579e+07	1.79446e+07	2.73008e+07	3.24993e+07	5.2795e+06	2.01369e+07	6.24621e+06	1.31112e+07	1.17857e+07	1.32147e+07	8.27857e+06	2.73008e+07	2.77389e+07	2.93996e+06	1.81171e+07	1
High	Master Protein	A8KAL2	cDNA FLJ76981, highly similar to Homo sapiens golgi autoantigen, golgin subfamily a, 5 (GOLGA5), mRNA [OS=Homo sapiens]	0	28.787	11	5	28	5	731	82.9	5.83	281	5.35	5	5	Pf01496, Pf01576, Pf02463, Pf03961, Pf04111, Pf04156, Pf04912, Pf05557, Pf05701, Pf06160, Pf07888, Pf08317, Pf09726, Pf09787, Pf10174, Pf11559, Pf12128, Pf13166, Pf13514, Pf13654	9950		GOLGA5	1.128	0.987	0.792	0.709386	0.8449	0.713878	40.86	33.97	21.41	1.21319e+06	831345	837959	1.60743e+06	1.29979e+06	1.02236e+06	1.20785e+06	302628	920771	529609	708509	825947	976271	599645	1.02236e+06	1.03092e+06	168523	828414	1
High	Master Protein	A8KAM5	cDNA FLJ77519, highly similar to Homo sapiens secreted frizzled related protein mRNA [OS=Homo sapiens]	0	28.25	15	3	23	3	313	35.3	8.85	133	30.34	3	3	Pf01392, Pf01759	6422		SFRP1	0.666	0.498	1.027	0.0283975	0.101032	0.501669	22.18	21.56	93.01	3.63737e+06	3.82659e+06	2.4641e+06	2.48091e+06	2.82171e+06	985072	1.03998e+06	5.53984e+06	1.50143e+06	1.58787e+06	3.26119e+06	2.42878e+06	1.50678e+06	1.30177e+06	985072	887650	3.08494e+06	1.35083e+06	1
High	Master Protein	A8KAN5	cDNA FLJ75097, highly similar to Homo sapiens upstream binding protein 1 (LBP-1a) (UBP1), mRNA [OS=Homo sapiens]	0	25.227	8	2	26	1	540	60.5	6.44	469	37.06	2	2	Pf04516	7342		UBP1	1.344	0.942	0.757	0.362687	0.979898	0.54176	11.54	15.05	17.71	495834	483728	448802	670367	198254	1.51712e+06	395145		499429	216453	412254	442369	407147	91462.8	1.51712e+06	337266		449334	1	Oxidation [K214]
High	Master Protein	A8KAQ7	ANAPC7 protein [OS=Homo sapiens]	0	29.612	11	5	28	5	564	62.9	5.63	273	32.95	4	5	Pf00515, Pf07719, Pf09674, Pf13414, Pf13432	51434		ANAPC7	0.946	0.822	0.869	0.689428	0.845496	0.931377	33.42	24.81	29.5	3.34758e+06	2.85467e+06	2.86052e+06	3.23501e+06	3.25791e+06	2.33713e+06	2.32809e+06	1.896e+06	3.55471e+06	1.46136e+06	2.43288e+06	2.81952e+06	1.96478e+06	1.50301e+06	2.33713e+06	1.98708e+06	1.05581e+06	3.19815e+06	1	Acetyl [N-Term]
High	Master Protein	A8KAY2	fibrillin 3 [OS=Homo sapiens]	0	74.019	7	13	45	12	2809	300.1	5.07	454	17.36	13	13	Pf00683, Pf06247, Pf07645, Pf12662, Pf12947, Pf14670	84467		FBN3	0.749	1.16	1.462	0.127677	0.439125	0.0299671	31.63	79.15	86.14	3.29598e+06	2.72572e+06	1.68312e+06	2.80664e+06	1.60781e+06	1.5823e+06	626690	6.31814e+06	1.46005e+06	1.43884e+06	2.32298e+06	1.65899e+06	1.70461e+06	741749	1.5823e+06	534895	3.51835e+06	1.3136e+06	1
High	Master Protein	A8KAY3	DNAH9 protein [OS=Homo sapiens]	0.005	2.192	0	1	5	1	2992	340.2	6.16	0	4.41	1	1	Pf03028, Pf07728, Pf08393, Pf12774, Pf12775, Pf12777, Pf12780, Pf12781	1770		DNAH9																												1
High	Master Protein	A8MQ02	Afadin [OS=Homo sapiens]	0	74.792	10	15	86	12	1781	201.7	6.51	464	66.94	15	15	Pf00498, Pf00595, Pf00788, Pf01843	4301	ENSG00000130396.20	MLLT4; AFDN	1.233	0.902	0.874	0.193591	0.698731	0.809421	35.26	52.49	50.17	6.09972e+06	5.89313e+06	5.21899e+06	7.9224e+06	6.34705e+06	6.12362e+06	6.67619e+06	352557	6.95392e+06	2.66279e+06	5.02238e+06	5.14418e+06	4.81167e+06	2.92815e+06	6.12362e+06	5.69828e+06	196326	6.25641e+06	1
High	Master Protein	A8MUM1	Protein TSSC1 [OS=Homo sapiens]	0	5.498	9	2	3	2	414	46.3	5.07	22	0	2	1	Pf00400	7260	ENSG00000032389.12	TSSC1; EIPR1	0.581	1.925	0.914	0.0445103	0.16787	0.874882	31.26	4.71	36.91	376131	257781	517215	395758	186564	353736	156729		167295	164197	219692	509801	240363	86069.7	353736	133772		150514	1
High	Master Protein	A8MVW0	Protein FAM171A2 [OS=Homo sapiens]	0.001	3.366	2	1	6	1	826	87.4	8.05	83	0	1	1	Pf10577	284069	ENSG00000161682.14	FAM171A2	0.508	1.064	1.949	0.0242394	0.862121	0.0486048	12.21	16.83	50.97	284367	220833	220559	181348	89111.4		261459		234805	124138	188203	217397	110142	41110.7		223161		211253	1
High	Master Protein	A8MX75	Tfiih basal transcription factor complex helicase xpd subunit [OS=Homo sapiens]	0	11.583	3	3	8	3	706	80.5	8.02	33	8.91	3	3	Pf06733, Pf06777, Pf13307		ENSG00000104884.14		1.32	1.063	0.918	0.364525	0.625463	0.944418	34.9	40.27	30.51	197552	1.46231e+06	1.49671e+06	242833	269007	1.16828e+06	1.27799e+06	1.38565e+06	1.83865e+06	86240	1.24624e+06	1.47525e+06	147484	124104	1.16828e+06	1.09079e+06	771618	1.65422e+06	1
High	Master Protein	A8MXN1	receptor expression-enhancing protein [OS=Homo sapiens]	0.003	2.468	6	1	4	1	139	15.5	8.48	20	2.03	1	1	Pf03134		ENSG00000115255.10		1.496	2.368	1.522	0.352753	0.0710634	0.198763	51.85	86.12	95.72	140897	216674	91474.1	193879	247467	210791	655870		169488	61507.7	184660	90162.9	117752	114167	210791	559801		152487	1
High	Master Protein	A8MXP9	Matrin-3 [OS=Homo sapiens]	0	507.355	47	40	867	40	895	99.9	6.04	9435	1158.09	40	40	Pf13893, Pf14259		ENSG00000280987.4		1.183	0.972	1.031	0.36379	0.563726	0.152695	49.26	84.72	90.34	1.78511e+08	1.47501e+08	1.62316e+08	2.0623e+08	2.10924e+08	1.27987e+08	1.37596e+08	4.30457e+08	1.36529e+08	7.79279e+07	1.25707e+08	1.59989e+08	1.25254e+08	9.73079e+07	1.27987e+08	1.17442e+08	2.39706e+08	1.22835e+08	1
High	Master Protein	A8MXV4	nucleoside diphosphate-linked moiety X motif 19 [OS=Homo sapiens]	0	8.07	6	2	10	2	375	42.2	7.64	21	2.55	2	2		390916	ENSG00000213965.3	NUDT19	1.051	0.498	0.622	0.924369	0.132143	0.22627	38.46	23.8	35.71	990057	694133	664389	729003	795926	400249	1.06322e+06	175561	419773	432202	591571	654866	442760	367193	400249	907480	97763.8	377668	1
High	Master Protein	A8MXZ4	G-protein-coupled receptor family C group 5 member C [OS=Homo sapiens]	0	15.966	9	3	22	3	462	50.2	8.65	468	12.63	3	3	Pf00003		ENSG00000170412.16		0.902	0.77	0.844	0.613119	0.655714	0.749156	27.16	38.43	17	2.02713e+06	1.16984e+06	853609	1.12225e+06	744034	342050	1.22048e+06	101462	759188	884928	996991	841373	681599	343253	342050	1.04171e+06	56500.8	683038	1
High	Master Protein	A8MYT4	Phosphatidylinositol 3-kinase catalytic subunit type 3 [OS=Homo sapiens]	0.001	3.723	1	1	7	1	824	94.3	6.64	75	0	1	1	Pf00454, Pf00613, Pf00792	5289	ENSG00000078142.12	PIK3C3	0.495	0.708	1.224	0.0224045	0.483968	0.620318	5.74	26.24	51.11	177333	160673	170615	134035	84452.9	71115.2	171781		83073	77413.6	136933	168170	81405.9	38961.6	71115.2	146619		74740.4	1
High	Master Protein	A9QVI3	Type IV collagen alpha3 chain [OS=Homo sapiens]	0	7.718	4	1	14	1	239	26.4	8.24	151	2.55	1	1	Pf01413	1285		COL4A3	2.054	2.455	1.548	0.00667769	0.00493748	0.0146951	65.78	50.43	33.79	1.42015e+06	1.33379e+06	643061	1.3957e+06	1.52407e+06	2.91705e+06	3.48601e+06	2.6034e+06	2.1603e+06	619955	1.13672e+06	633844	847680	703114	2.91705e+06	2.97539e+06	1.44974e+06	1.94361e+06	1
High	Master Protein	A9UK02	CGI-121 [OS=Homo sapiens]	0.004	2.248	4	1	8	1	157	17.7	7.37	127	6.9	1	1	Pf08617	51002		TPRKB	0.847	0.98	1.33	0.498303	0.966213	0.401917	25.43	34.7	27.05	212099	278808	425228	179565	205324	368060	258438	273099	322923	92590.4	237613	419132	109059	94724.4	368060	220583	152079	290532	1
High	Master Protein	B0BCY8	aminopeptidase [OS=Homo sapiens]	0	90.535	17	15	49	15	957	109.1	5.43	331	35.5	15	15	Pf01433, Pf11838, Pf13485	2028		ENPEP	11.309	16.377	2.321	1e-17	1e-17	4.80397e-07	18.89	195.96	117.11		41412.2		1.00687e+06	3.92945e+06	6.79585e+06	2.13234e+07		2.48141e+06		35293.3		611520	1.81282e+06	6.79585e+06	1.82e+07		2.23252e+06	1
High	Master Protein	B0FTY2	NUDC-like protein [OS=Homo sapiens]	0	12.84	13	2	8	2	361	40.8	5.2	54	5.68	2	2	Pf04969, Pf14050	23386		NUDCD3	0.763	0.652	0.761	0.314994	0.38839	0.500804	10.92	19.88	15.66	237094	577050	614852	465921	374395	344482	302632		207085	103502	491788	606039	282977	172724	344482	258304		186313	1
High	Master Protein	B0I1S0	DYNC2H1 variant protein [OS=Homo sapiens]	0.004	2.265	1	2	4	2	4307	492.3	6.52	0	0	2	2	Pf00769, Pf03028, Pf07728, Pf08385, Pf08393, Pf12774, Pf12775, Pf12777, Pf12780, Pf12781, Pf13401	79659		DYNC2H1	0.01	0.721	100	1e-17	0.513573	1e-17		17.42		35490.6	72708.9	56262.2					40553.7		15493.2	61965.7	55455.7					22582.9		1	Oxidation [K266]
High	Master Protein	B0QY16	Uncharacterized protein KIAA0930 [OS=Homo sapiens]	0.003	2.443	8	1	2	1	289	32.4	7.53	16	0	1	1	Pf09741	23313	ENSG00000100364.18	KIAA0930																												1
High	Master Protein	B0QY34	Casein kinase I isoform epsilon [OS=Homo sapiens]	0	18.455	11	3	22	3	336	38.4	9.28	95	8.87	3	3	Pf00069, Pf01636, Pf07714	1454	ENSG00000213923.11	CSNK1E	0.957	0.771	0.788	0.833498	0.687977	0.693145	28.47	19.84	24.08	1.57057e+06	1.34425e+06	1.29866e+06	1.41523e+06	1.89368e+06	1.03658e+06	1.23137e+06	1.3126e+06	990314	685620	1.14563e+06	1.28004e+06	859542	873631	1.03658e+06	1.051e+06	730939	890980	1
High	Master Protein	B0QYK0	RNA-binding protein EWS [OS=Homo sapiens]	0	151.927	18	9	244	9	618	64.9	9.38	4842	369.46	9	9	Pf00076, Pf00641, Pf14259	2130	ENSG00000182944.17	EWSR1	1.135	0.467	0.543	0.512945	0.0591358	0.0195742	35.91	25.5	33.09	5.34703e+07	5.24532e+07	5.36461e+07	6.31451e+07	6.10746e+07	5.46506e+07	4.66747e+07	4.56518e+06	4.61787e+07	2.33421e+07	4.47029e+07	5.28771e+07	3.83512e+07	2.81762e+07	5.46506e+07	3.9838e+07	2.54219e+06	4.15467e+07	1	Oxidation [P487; P489]
High	Master Protein	B0QYK4	EMI domain-containing protein 1 [OS=Homo sapiens]	0	10.345	11	2	10	2	422	43.4	9	15	0	2	1	Pf07546	129080	ENSG00000186998.15	EMID1	2.345	2.059	0.608	0.0327366	0.0856271	0.181481	17.08	86.54	24.33		75142.2		155913	176218	1.63722e+06	64407.9	1.42661e+06	975744		64039.5		94693.7	81296.7	1.63722e+06	54973.6	794430	877872	1	Oxidation [P243; P248; P249; P251; P252; P254; P255; P257; P258; P260; P261]
High	Master Protein	B0QZ18	Copine-1 [OS=Homo sapiens]	0	91.471	21	11	159	11	542	59.7	6.04	1520	188.24	11	11	Pf00092, Pf00168, Pf07002, Pf10138, Pf13519	8904	ENSG00000214078.12	CPNE1	0.848	0.897	0.991	0.363191	0.761288	0.275834	31.84	47.92	61.86	1.05211e+07	1.29306e+07	1.61863e+07	1.18043e+07	9.97191e+06	2.23255e+07	1.6689e+07	8.53631e+06	1.99888e+07	4.5929e+06	1.102e+07	1.59543e+07	7.16933e+06	4.60045e+06	2.23255e+07	1.42445e+07	4.75356e+06	1.79838e+07	1
High	Master Protein	B0QZ35	NAD-dependent protein deacetylase sirtuin-1 [OS=Homo sapiens]	0	11.576	6	1	4	1	444	49.2	4.75	15	5.42	1	1	Pf02146	23411	ENSG00000096717.11	SIRT1	1.158	1.159	1	0.650635	0.688745	0.917544	48.94	60.78	44.89	164661	260549	387225	209370		408625	193932		441464	71881.8	222051	381675	127161		408625	165525		397183	1
High	Master Protein	B0YJ73	Ras suppressor protein 1 variant 5 [OS=Homo sapiens]	0	9.982	10	3	28	3	229	25.7	7.24	129	20.15	3	3	Pf12799, Pf13855	6251		RSU1	1.051	0.765	0.844	0.921797	0.659348	0.873711	40.13	32.89	38.26	729208	1.17255e+06	1.51215e+06	1.27827e+06	1.13749e+06	1.82768e+06	1.28114e+06	139292	786753	318331	999296	1.49048e+06	776357	524768	1.82768e+06	1093479	77566.7	707838	1
High	Master Protein	B1AHQ6	Centromere protein M [OS=Homo sapiens]	0.003	2.468	8	1	2	1	146	16.1	7.84	30	0	1	1	Pf11111	79019	ENSG00000100162.14	CENPM	100	100	0.95	1e-17	1e-17	0.981064			15.2				225857				240410	191694				137174				133876	172466	1
High	Master Protein	B1AJY7	26S proteasome non-ATPase regulatory subunit 10 [OS=Homo sapiens]	0	40.227	34	5	64	5	193	20.8	6.64	802	69.08	5	5	Pf00023, Pf12796, Pf13606, Pf13637, Pf13857	5716	ENSG00000101843.18	PSMD10	0.846	0.813	0.836	0.373181	0.991632	0.930728	55.6	60.19	55.92	2.95177e+06	5.3126e+06	6.36553e+06	4.00007e+06	4.23178e+06	9.62685e+06	5.50097e+06	1.17317e+06	7.09692e+06	1.28858e+06	4.52763e+06	6.27429e+06	2.42944e+06	1.95229e+06	9.62685e+06	4.69521e+06	653299	6.38506e+06	1
High	Master Protein	B1AKJ6	Oxysterol-binding protein [OS=Homo sapiens]	0	53.714	15	10	65	10	741	83.7	6.48	307	8.92	10	10	Pf00169, Pf01237, Pf15409, Pf15413	114883		OSBPL9	0.962	0.74	0.743	0.812732	0.62084	0.4183	38.37	24.58	26.03	2.37284e+06	2.87198e+06	3.17079e+06	2.43397e+06	2.82573e+06	2.22468e+06	2.33731e+06	1.38689e+06	2.54822e+06	1.03585e+06	2.44763e+06	3.12534e+06	1.47827e+06	1.30363e+06	2.22468e+06	1.99495e+06	772310	2.29262e+06	1
High	Master Protein	B1AKY9	Sodium/potassium-transporting ATPase subunit alpha [OS=Homo sapiens]	0	181.913	16	16	288	1	1009	110.8	5.59	5326	393.33	16	16	Pf00122, Pf00689, Pf00690, Pf00702, Pf08282, Pf12710, Pf13246	477	ENSG00000018625.14	ATP1A2																												1
High	Master Protein	B1ALI9	Thioredoxin interacting protein [OS=Homo sapiens]	0	7.632	9	2	10	2	304	33.6	8.56	23	2.14	2	2	Pf00339, Pf02752	10628		TXNIP	1.204	1.187	0.891	0.57586	0.599944	0.873497	12.61	95.49	60.68	502462	532106	506059	609368	821124	1.24106e+06	1.32407e+06	212260	600618	219346	453485	498805	370099	378818	1.24106e+06	1.13012e+06	118200	540373	1
High	Master Protein	B1AMN7	CTTNBP2 N-terminal-like protein [OS=Homo sapiens]	0	11.556	12	3	6	3	271	31.8	6.09	38	5.27	3	3	Pf04111, Pf09727	55917	ENSG00000143079.14	CTTNBP2NL	1.091	0.767	0.654	0.803884	0.606469	0.235195	55.71	46.54	41.64	635574	397253	1.00671e+06	619629	442475	557195	835313	58397.2	900457	277455	338556	992276	376332	204132	557195	712959	32519.3	810137	1
High	Master Protein	B1AN62	Nicotinamide/nicotinic acid mononucleotide adenylyltransferase 1 [OS=Homo sapiens]	0	7.033	9	1	2	1	160	18.3	8.9	18	2.72	1	1	Pf01467	64802	ENSG00000173614.13	NMNAT1	0.803	1.998	2.488	0.382764	0.144983	0.00711798	15.54	13.56	18.58	147045	160494	191665	128855	114508	551665	319035		322275	64191.6	136780	188918	78259.8	52827.3	551665	272304		289949	1
High	Master Protein	B1ANG9	guanylate kinase [OS=Homo sapiens]	0	41.668	36	5	32	2	235	25.3	7.44	362	37.65	5	5	Pf00005, Pf00625, Pf00910, Pf01926, Pf03193, Pf05729, Pf13173, Pf13191, Pf13207, Pf13401, Pf13555, Pf13671		ENSG00000143774.16		1.102	1.285	0.921	0.657624	0.279061	0.830329	57.51	43.76	50.35	2.69374e+06	2.78885e+06	1.46557e+06	2.85909e+06	2.0862e+06	4.53317e+06	4.39952e+06	1.66031e+06	3.28942e+06	1.17593e+06	2.37678e+06	1.44456e+06	1.73647e+06	962449	4.53317e+06	3.7551e+06	924570	2.95947e+06	1
High	Master Protein	B1Q2B0	URCC5 [OS=Homo sapiens]	0	90.387	22	13	100	13	911	101.2	8.43	537	83.68	13	13		152518		NFXL1	0.948	0.631	0.702	0.783638	0.409388	0.356387	38.59	28.88	37.2	7.07695e+06	6.10535e+06	4.23744e+06	5.98578e+06	5.77585e+06	3.98012e+06	3.82305e+06	1.00714e+06	6.04394e+06	3.08939e+06	5.20325e+06	4.1767e+06	3.63547e+06	2.66463e+06	3.98012e+06	3.26307e+06	560838	5.43771e+06	1
High	Master Protein	B2R4I8	cDNA, FLJ92106, highly similar to Homo sapiens adaptor-related protein complex 3, sigma 1 subunit(AP3S1), mRNA [OS=Homo sapiens]	0	27.052	23	4	30	4	193	21.7	5.39	384	22.42	4	4	Pf01217	1176		AP3S1	1.069	1.239	1.152	0.80892	0.276786	0.200021	41.08	68.3	69.99	1.55967e+06	2.67039e+06	2.53508e+06	2.10353e+06	2.202e+06	2.90113e+06	3.92163e+06	400399	3.46354e+06	680864	2.27582e+06	2.49875e+06	1.27758e+06	1.01587e+06	2.90113e+06	3.34721e+06	222968	3.11613e+06	1
High	Master Protein	B2R5H0	Protein S100 [OS=Homo sapiens]	0	12.895	12	2	11	2	105	11.7	7.18	119	13.64	2	2	Pf00036, Pf01023, Pf13499	6282		S100A11	0.457	0.649	0.998	0.000138169	0.385743	0.542766	19.19	32.7	75.15	1.52687e+06	2.2974e+06	3.39404e+06	908938	994058	1.57964e+06	2.11686e+06	605693	1.40369e+06	666543	1.95794e+06	3.34538e+06	552043	458599	1.57964e+06	1.80679e+06	337289	1.26289e+06	1
High	Master Protein	B2R5S9	cDNA, FLJ92604, highly similar to Homo sapiens paraneoplastic antigen MA3 (PNMA3), mRNA [OS=Homo sapiens]	0.01	1.677	3	1	4	1	463	52.3	9.5	0	0	1	1	Pf14893	29944		PNMA3	0.527	0.721	1.369	0.0121246	0.520522	0.244384	12.86	20.64	50.83		660342	1.29037e+06	445294	491274	530872	959881		461573		562772	1.27187e+06	270449	226645	530872	819281		415275	1
High	Master Protein	B2R5U1	cDNA, FLJ92620, highly similar to Homo sapiens staphylococcal nuclease domain containing 1 (SND1),mRNA [OS=Homo sapiens]	0	605.612	63	51	921	51	885	99.6	6.96	10809	1187.9	51	51	Pf00565, Pf00567	27044		SND1	1.192	0.697	0.67	0.33797	0.587916	0.26955	48.28	33.81	34.4	2.8946e+08	2.72994e+08	2.0485e+08	2.46352e+08	2.48695e+08	2.98891e+08	1.88999e+08	7.10414e+07	2.77755e+08	1.26361e+08	2.32657e+08	2.01913e+08	1.49622e+08	1.14733e+08	2.98891e+08	1.61315e+08	3.95604e+07	2.49894e+08	1
High	Master Protein	B2R642	cDNA, FLJ92775, highly similar to Homo sapiens melanoma cell adhesion molecule (MCAM), mRNA [OS=Homo sapiens]	0	33.727	11	4	18	4	646	71.6	5.76	312	25.97	4	4	Pf00047, Pf07679, Pf07686, Pf08205, Pf13895, Pf13927	4162		MCAM	1.033	1.551	1.297	0.998616	0.176814	0.09773	56.09	94.5	93.42	1.17885e+06	1.08546e+06	584019	1.24868e+06	992168	653258	2.38465e+06		494844	514618	925080	575648	758384	457727	653258	2.03535e+06		445209	1
High	Master Protein	B2R659	cDNA, FLJ92803, highly similar to Homo sapiens hydroxysteroid (17-beta) dehydrogenase 4 (HSD17B4), mRNA [OS=Homo sapiens]	0	477.408	55	36	786	36	736	79.6	8.9	13155	1087.69	36	36	Pf00106, Pf01575, Pf02036, Pf08659, Pf13452, Pf13561, Pf14864	3295		HSD17B4	1.01	0.702	0.77	0.940265	0.604612	0.773058	44.69	31.08	35.4	1.83351e+08	1.77054e+08	1.52485e+08	1.78062e+08	1.75539e+08	1.62454e+08	1.82979e+08	5.9968e+07	1.31143e+08	8.00407e+07	1.50893e+08	1.503e+08	1.08146e+08	8.09835e+07	1.62454e+08	1.56177e+08	3.3394e+07	1.17989e+08	1
High	Master Protein	B2R6K4	cDNA, FLJ92996, highly similar to Homo sapiens guanine nucleotide binding protein (G protein), beta polypeptide 1 (GNB1), mRNA [OS=Homo sapiens]	0	289.848	69	17	396	10	340	37.3	6.18	8253	610.63	17	17	Pf00400	2782		GNB1	0.992	0.599	0.642	0.848281	0.292677	0.177317	40.35	27.42	35.04	1.87909e+08	1.55453e+08	1.31479e+08	1.61093e+08	1.51031e+08	9.60211e+07	1.0534e+08	3.61608e+07	1.14103e+08	8.20305e+07	1.32484e+08	1.29594e+08	9.78398e+07	6.96768e+07	9.60211e+07	8.99102e+07	2.01367e+07	1.02658e+08	1
High	Master Protein	B2R6Q2	Alkaline phosphatase [OS=Homo sapiens]	0	23.508	13	5	27	5	524	57.2	6.57	308	12.11	5	5	Pf00245	249		ALPL	1.153	0.792	0.655	0.549137	0.731657	0.230591	45.74	34.78	21.03	1.83728e+06	1.26256e+06	618835	2.05018e+06	2.48452e+06	1.05928e+06	1.65775e+06	1.32517e+06	1.07347e+06	802050	1.07601e+06	609964	1.24518e+06	1.14621e+06	1.05928e+06	1.41493e+06	737939	965800	1
High	Master Protein	B2R6S9	cDNA, FLJ93097, highly similar to Homo sapiens low density lipoprotein receptor-related protein associated protein 1 (LRPAP1), mRNA [OS=Homo sapiens]	0	61.159	31	9	70	9	357	41.5	8.92	551	72.06	9	9	Pf06400, Pf06401	4043		LRPAP1	1.357	1.165	0.859	0.0691665	0.213732	0.803721	39.05	84.95	73.47	9.68662e+06	7.9263e+06	6.54263e+06	1.21644e+07	1.21127e+07	6.0188e+06	1.32453e+07	924188	7.21915e+06	4.22863e+06	6.75514e+06	6.44885e+06	7.38804e+06	5.58807e+06	6.0188e+06	1.13052e+07	514647	6.49503e+06	1	Oxidation [K213]
High	Master Protein	B2R6U8	cDNA, FLJ93125, highly similar to Homo sapiens cleavage and polyadenylation specific factor 5, 25 kDa(CPSF5), mRNA [OS=Homo sapiens]	0	128.729	43	13	209	13	227	26.2	8.82	2011	191.55	13	13	Pf13869	11051		NUDT21	0.884	0.613	0.804	0.364371	0.330645	0.973754	30.7	36.43	68.85	5.29264e+07	6.26829e+07	6.52082e+07	5.04014e+07	5.54737e+07	5.4562e+07	5.42772e+07	7.8148e+06	5.60554e+07	2.31046e+07	5.34211e+07	6.42735e+07	3.06113e+07	2.55923e+07	5.4562e+07	4.63269e+07	4.35178e+06	5.04327e+07	1
High	Master Protein	B2R6X2	beta-glucuronidase [OS=Homo sapiens]	0	30.941	12	6	39	6	651	74.7	7.02	326	33.18	6	6	Pf02836, Pf02837	2990		GUSB	1.4	1.393	0.894	0.095537	0.18921	0.962417	38.93	70.44	70.05	2.15888e+06	1.86e+06	1.68885e+06	2.27998e+06	2.43235e+06	3.85626e+06	3.64615e+06	237180	3.07528e+06	942445	1.58518e+06	1.66464e+06	1.38475e+06	1.12214e+06	3.85626e+06	3.11207e+06	132077	2.76681e+06	1
High	Master Protein	B2R6X8	cDNA, FLJ93169, highly similar to Homo sapiens GPAA1P anchor attachment protein 1 homolog (yeast) (GPAA1), mRNA [OS=Homo sapiens]	0	26.416	9	5	43	5	621	67.6	8.06	433	27.59	5	4	Pf04114	8733		GPAA1	0.971	0.771	0.842	0.798184	0.752886	0.852733	31.92	40.22	42.23	6.77843e+06	4.14161e+06	3.2431e+06	4.33085e+06	5.18186e+06	1.95222e+06	2.58244e+06	649461	2.42856e+06	2.95907e+06	3.52966e+06	3.19661e+06	2.63034e+06	2.3906e+06	1.95222e+06	2.20417e+06	361662	2.18496e+06	1
Medium	Master Protein	B2R735	cDNA, FLJ93262, highly similar to Homo sapiens interleukin 21 receptor (IL21R), mRNA [OS=Homo sapiens]	0.023	0.931	2	1	1	1	538	59.1	4.7	0		1			50615		IL21R	0.793	0.767	0.967	0.356072	0.594278	0.928413	15.4	18.38	94.18	741102	723655	621006	649888	573672	302273	554885	93867.6	671883	323523	616731	612104	394710	264658	302273	473607	52271.5	604489	1
High	Master Protein	B2R745	cDNA, FLJ93277, highly similar to Homo sapiens solute carrier family 30 (zinc transporter), member 9(SLC30A9), mRNA [OS=Homo sapiens]	0	13.432	4	2	10	2	568	63.4	8.32	177	11.33	2	2	Pf01545	10463		SLC30A9	1.145	1.039	0.932	0.69982	0.739833	0.848797	22.28	82.53	78.07	808508	919776	768717	1.01891e+06	980182	713778	953558	248513	1.22906e+06	352948	783874	757698	618833	452198	713778	813884	138388	1105781	1
High	Master Protein	B2R761	cDNA, FLJ93299, highly similar to Homo sapiens sterol carrier protein 2 (SCP2), mRNA [OS=Homo sapiens]	0	86.989	21	13	165	13	547	59	7.05	1656	168.45	13	12	Pf00108, Pf00109, Pf02036, Pf02801, Pf02803, Pf08545, Pf14864	6342		SCP2	1.203	0.845	0.706	0.356784	0.91677	0.458761	52.79	94.54	62.6	3.44167e+07	2.47491e+07	1.91903e+07	3.29172e+07	2.70781e+07	3.19738e+07	4.59802e+07	1.93102e+06	2.28371e+07	1.50244e+07	2.10923e+07	1.89152e+07	1.99923e+07	1.24922e+07	3.19738e+07	39245218	1.07532e+06	2.05465e+07	1
High	Master Protein	B2R780	cDNA, FLJ93320, highly similar to Homo sapiens angiopoietin-like 2 (ANGPTL2), mRNA [OS=Homo sapiens]	0	47.718	22	9	17	9	493	57	7.52	143	16.85	8	9	Pf00147	23452		ANGPTL2	1.017	1.764	1.654	0.964931	0.0608114	0.00380024	68.33	91.75	88.97	1.04796e+06	1.27078e+06	1.41584e+06	1.134e+06	1.79773e+06	1.09994e+06	1.09278e+06	6.06639e+06	1.38495e+06	457479	1.08302e+06	1.39555e+06	688734	829365	1.09994e+06	932717	3.37815e+06	1.24603e+06	1
High	Master Protein	B2R7B5	cDNA, FLJ93365, highly similar to Homo sapiens KH domain containing, RNA binding, signal transduction associated 1 (KHDRBS1), mRNA [OS=Homo sapiens]	0	121.113	25	9	208	9	443	48.2	8.66	2099	274.25	9	9	Pf00013, Pf13014	10657		KHDRBS1	0.99	0.617	0.724	0.841078	0.340921	0.515338	62.03	31.19	49.8	1.98983e+08	1.4691e+08	1.31643e+08	1.79729e+08	1.56258e+08	1.24246e+08	1.31931e+08	3.63927e+07	2.20291e+08	8.68648e+07	1.25203e+08	1.29756e+08	1.09158e+08	7.20883e+07	1.24246e+08	1.12606e+08	2.02658e+07	1.98195e+08	1
High	Master Protein	B2R7D2	cDNA, FLJ93389, highly similar to Homo sapiens multiple inositol polyphosphate histidine phosphatase, 1 (MINPP1), mRNA [OS=Homo sapiens]	0	12.883	5	2	10	2	487	55.1	7.97	182	13.33	2	2	Pf00328	9562		MINPP1	0.613	0.585	0.802	0.0429782	0.229862	0.647651	15.98	16.41	24.05	967255	972846	1.16174e+06	709597	689689	714819	619737	109673	631568	422248	829102	1.14509e+06	430974	318181	714819	528960	61073.2	568218	1
High	Master Protein	B2R7G6	cDNA, FLJ93437, highly similar to Homo sapiens histidyl-tRNA synthetase-like (HARSL), mRNA [OS=Homo sapiens]	0	36.186	14	7	48	4	506	56.9	8.02	592	41.13	7	6	Pf00587, Pf03129, Pf12745, Pf13393	23438		HARS2	0.795	0.49	0.676	0.290821	0.100986	0.289721	17.05	9.04	18.95	1.4114e+06	1.10278e+06	745401	945373	883511	588817	741994	395206	464834	616138	939836	734716	574172	407600	588817	633309	220076	418209	1
High	Master Protein	B2R7R5	cDNA, FLJ93570, highly similar to Homo sapiens phosphoribosyl pyrophosphate synthetase-associated protein 2 (PRPSAP2), mRNA [OS=Homo sapiens]	0	85.487	39	10	78	8	369	40.9	7.44	609	86.8	9	10	Pf13793, Pf14572	5636		PRPSAP2	0.954	0.898	0.971	0.817925	0.808541	0.559582	36.13	43.93	46.21	2.74152e+06	5.24938e+06	5.4875e+06	5.12723e+06	5.40362e+06	3980016	3.49149e+06	503084	4.22119e+06	1.19679e+06	4.47375e+06	5.40884e+06	3.11403e+06	2492911	3980016	2.98007e+06	280149	3.79778e+06	1
High	Master Protein	B2R7T8	cDNA, FLJ93598, highly similar to Homo sapiens capping protein (actin filament) muscle Z-line, beta (CAPZB), mRNA [OS=Homo sapiens]	0	204.086	57	19	319	19	272	30.6	6	4511	432.93	19	19	Pf01115	832		CAPZB	0.903	0.615	0.634	0.437523	0.334603	0.153852	29.34	39.83	42.47	7.34667e+07	7.96554e+07	8.66125e+07	7.51695e+07	7.49754e+07	9.4588e+07	9.17838e+07	1.15794e+07	9.10905e+07	3.20714e+07	6.78859e+07	8.53709e+07	4.56542e+07	3.45892e+07	9.4588e+07	7.83396e+07	6.44817e+06	8.19537e+07	1
High	Master Protein	B2R7V4	cDNA, FLJ93619, highly similar to Homo sapiens PRP4 pre-mRNA processing factor 4 homolog (yeast) (PRPF4), mRNA [OS=Homo sapiens]	0	139.084	39	16	199	16	522	58.4	7.42	1553	218.8	16	16	Pf00400, Pf08799	9128		PRPF4	0.992	0.711	0.76	0.911327	0.646366	0.709652	32.63	27.64	24.71	2.0894e+07	1.78242e+07	1.87585e+07	2.10981e+07	1.55937e+07	2.0353e+07	1.59511e+07	8.45927e+06	1.74556e+07	9.12114e+06	1.51905e+07	1.84896e+07	1.28139e+07	7.19401e+06	2.0353e+07	1.36146e+07	4.71067e+06	1.57047e+07	1
High	Master Protein	B2R7W0	cDNA, FLJ93628, Homo sapiens methylene tetrahydrofolate dehydrogenase (NAD+dependent), methenyltetrahydrofolate cyclohydrolase (MTHFD2),nuclear gene encoding mitochondrial protein, mRNA [OS=Homo sapiens]	0	27.365	15	4	18	4	344	37.3	8.73	248	31.31	4	4	Pf00763, Pf02882	10797		MTHFD2	0.811	0.78	1.042	0.219301	0.819792	0.423976	19.86	39.17	55.46	5.33514e+06	4.68244e+06	4.322e+06	4.25731e+06	3.8977e+06	2.32813e+06	2.66271e+06	6.75629e+06	3.08351e+06	2.32902e+06	3.99058e+06	4.26005e+06	2.58568e+06	1.79817e+06	2.32813e+06	2.27268e+06	3.76234e+06	2.77422e+06	1
High	Master Protein	B2R823	cDNA, FLJ93703, highly similar to Homo sapiens putatative 28 kDa protein (LOC56902), mRNA [OS=Homo sapiens]	0	19.579	23	4	20	4	252	27.9	9.73	193	18.28	4	4	Pf00013	56902		PNO1	1.292	0.859	0.659	0.413302	0.820135	0.306903	18.86	19.94	12.36	323264	577711	570592	677685	658945	371140	424057	1.28693e+06	376066	141118	492350	562413	411592	303998	371140	361942	716645	338345	1
High	Master Protein	B2R825	alpha-1,4 glucan phosphorylase [OS=Homo sapiens]	0	68.85	17	13	85	8	847	97	7.3	755	70.08	13	13	Pf00343	5836		PYGL	1.12	0.87	0.749	0.596443	0.983379	0.497242	26.92	41.8	45.56	1.61203e+06	1.94256e+06	2.09121e+06	2.01761e+06	2.09767e+06	1.94375e+06	2.12802e+06	421012	1.60622e+06	703720	1.65554e+06	2.06123e+06	1.22539e+06	967739	1.94375e+06	1.81631e+06	234446	1.44511e+06	1
High	Master Protein	B2R841	Serine/threonine-protein kinase PLK [OS=Homo sapiens]	0	7.231	7	3	6	3	603	68.2	8.91	15	0	3	3	Pf00069, Pf00659, Pf07714, Pf14531	5347		PLK1	0.633	1.066	1.402	0.122021	0.857065	0.295644	11.91	62.6	76.13	272701	235861	424646	168840	185523	235299	88035.3	586458	188149	119046	201011	418559	102545	85589.5	235299	75140.2	326578	169277	1
High	Master Protein	B2R850	cDNA, FLJ93740, highly similar to Homo sapiens zinc finger protein 161 homolog (mouse) (ZFP161), mRNA [OS=Homo sapiens]	0.009	1.746	4	1	2	1	449	50.9	6.04	0	0	1	1	Pf00096, Pf00651, Pf13465	7541		ZBTB14; ZFP161																												1
High	Master Protein	B2R8A2	cDNA, FLJ93804, highly similar to Homo sapiens gp25L2 protein (HSGP25L2G), mRNA [OS=Homo sapiens]	0	90.157	35	7	121	6	214	25.1	7.18	1821	190.68	7	7	Pf01105	54732		TMED9	1.262	0.716	0.551	0.25298	0.651116	0.0297331	65.57	41.11	22.83	2.8874e+07	2.3327e+07	1.73468e+07	3.15567e+07	3.37721e+07	2.05347e+07	2.8388e+07	7.05417e+06	2.461e+07	1.26047e+07	1.98803e+07	1.70982e+07	1.91659e+07	1.55804e+07	2.05347e+07	2.42298e+07	3.92821e+06	2.21415e+07	1
High	Master Protein	B2R8D1	cDNA, FLJ93841, highly similar to Homo sapiens nitrilase 1 (NIT1), mRNA [OS=Homo sapiens]	0	58.895	35	7	74	7	327	35.9	7.74	880	78.51	7	7	Pf00795	4817		NIT1	1.232	1.104	0.897	0.265579	0.377979	0.805493	58.63	77.82	62.51	3.31177e+06	4.04616e+06	5.20775e+06	3.88813e+06	3.94978e+06	7.7983e+06	5.06502e+06	750976	6.63408e+06	1.44573e+06	3.44832e+06	5.1331e+06	2.36145e+06	1.82219e+06	7.7983e+06	4.32311e+06	418192	5.96865e+06	1
High	Master Protein	B2R8G6	peptidylprolyl isomerase [OS=Homo sapiens]	0	100.224	28	9	134	9	356	38.5	7.69	2032	167	9	9	Pf00254, Pf00515, Pf07719, Pf13181, Pf13414, Pf13424, Pf13432, Pf14559	23770		FKBP8	0.771	0.575	0.728	0.140498	0.264121	0.485183	36.29	14.86	28.23	1.8092e+07	1.50917e+07	1.04239e+07	1.57072e+07	1.14124e+07	6.55717e+06	7.14449e+06	6.74246e+06	1.00995e+07	7.89792e+06	1.28618e+07	1.02745e+07	9.53976e+06	5.26502e+06	6.55717e+06	6.09799e+06	3.75463e+06	9.08648e+06	1
High	Master Protein	B2R8H4	cDNA, FLJ93903, highly similar to Homo sapiens solute carrier family 2 (facilitated glucose transporter), member 4 (SLC2A4), mRNA [OS=Homo sapiens]	0.001	3.895	2	1	2	1	509	54.7	6.93	27	0	1	1	Pf00083, Pf07690, Pf13347	6517		SLC2A4	0.779	0.496	0.608	0.344598	0.150197	0.241548	36.12	7.2	17.52	238583	204262	145193	222985	159088	86918	114482		74490.1	104152	174081	143112	135430	73393.8	86918	97712.8		67018.4	1
Medium	Master Protein	B2R8I2	cDNA, FLJ93914, highly similar to Homo sapiens histidine-rich glycoprotein (HRG), mRNA [OS=Homo sapiens]	0.03	0.704	1	1	1	1	525	59.5	7.44	0		1			3273		HRG																												1
High	Master Protein	B2R921	cDNA, FLJ94171, highly similar to Homo sapiens solute carrier family 25 (mitochondrial carrier; ornithine transporter) member 15 (SLC25A15), nuclear gene encoding mitochondrial protein, mRNA [OS=Homo sapiens]	0	21.673	15	4	20	4	301	32.8	9.29	160	20.32	4	4	Pf00153	10166		SLC25A15	0.615	0.283	0.602	0.0123603	0.00144828	0.124003	32.17	5.32	28.49	4.39751e+06	3.24817e+06	1.81968e+06	2.25783e+06	2.66545e+06	524483	1.65386e+06	487126	738072	1.9197e+06	2.76824e+06	1.7936e+06	1.37129e+06	1.22968e+06	524483	1.41161e+06	271263	664039	1
High	Master Protein	B2R928	Mitogen-activated protein kinase kinase kinase kinase [OS=Homo sapiens]	0	9.905	6	3	8	3	846	95	7.74	21	2.5	3	3	Pf00069, Pf00780, Pf07714	11183		MAP4K5	0.916	0.674	0.752	0.686957	0.430908	0.501398	27.12	14.06	21.28	453572	634711	695299	589724	562275	420980	669638	194292	177004	198004	540929	685332	358169	259401	420980	571551	108194	159250	1
High	Master Protein	B2R959	cDNA, FLJ94229, highly similar to Homo sapiens heterogeneous nuclear ribonucleoprotein L (HNRPL),mRNA [OS=Homo sapiens]	0	448.56	55	30	962	18	558	60.2	7.11	13517	1522.96	29	30	Pf00076, Pf13893, Pf14259	3191		HNRNPL	1.142	0.809	0.803	0.488959	0.966985	0.968195	62.18	36.66	42.41	4.09497e+08	3.08427e+08	2.72953e+08	4.0648e+08	3.79528e+08	1.69457e+08	2.42708e+08	3.57565e+08	1.71481e+08	1.78763e+08	2.62855e+08	2.69041e+08	2.46875e+08	1.75092e+08	1.69457e+08	2.07157e+08	1.99115e+08	1.54281e+08	1	Oxidation [P340; P346]
High	Master Protein	B2R960	cDNA, FLJ94230, highly similar to Homo sapiens thioredoxin-like 1 (TXNL1), mRNA [OS=Homo sapiens]	0	136.558	51	11	149	11	289	32.2	4.96	2051	143.09	11	10	Pf00085, Pf06201, Pf13098	9352		TXNL1	0.9	0.746	0.815	0.513325	0.754983	0.92972	32.23	34.78	35.29	1.65253e+07	2.49322e+07	3.04173e+07	2.32003e+07	2.21586e+07	2.90992e+07	2.74068e+07	8.54446e+06	2.56835e+07	7.21399e+06	2.12483e+07	2.99813e+07	1.40907e+07	1.02226e+07	2.90992e+07	2.33924e+07	4.7581e+06	2.31073e+07	1
High	Master Protein	B2R9J4	cDNA, FLJ94423, highly similar to Homo sapiens mitochondrial ribosomal protein L23 (MRPL23), nuclear gene encoding mitochondrial protein, mRNA [OS=Homo sapiens]	0	34.799	41	5	58	5	153	17.8	9.69	488	59.35	5	5	Pf00276	6150		MRPL23	1.028	0.827	0.925	0.845919	0.929859	0.589365	29.27	41.17	43.23	9.61003e+06	7.7171e+06	6.55726e+06	8.21707e+06	8.56334e+06	6.27324e+06	8.67147e+06	3.24413e+06	6.34101e+06	4.19519e+06	6.57685e+06	6.46327e+06	4.99063e+06	3.95062e+06	6.27324e+06	7.4013e+06	1.80654e+06	5.70497e+06	1
High	Master Protein	B2R9K6	cDNA, FLJ94436, highly similar to Homo sapiens platelet derived growth factor C (PDGFC), mRNA [OS=Homo sapiens]	0	10.853	8	2	4	2	345	39	6.14	32	0	2	2	Pf00341, Pf00431	56034		PDGFC	100	100	6.474	1e-17	1e-17	6.22394e-08			0						73004.3		943517							73004.3		525411		1
High	Master Protein	B2R9K8	cDNA, FLJ94440, highly similar to Homo sapiens chaperonin containing TCP1, subunit 6A (zeta 1)(CCT6A), mRNA [OS=Homo sapiens]	0	250.489	43	23	406	23	531	57.9	6.8	4748	545.31	22	23	Pf00118, Pf05504	908		CCT6A	0.986	0.758	0.82	0.821475	0.795411	0.933408	36.98	41.62	49.17	1.19399e+08	1.34764e+08	1.46021e+08	1.41109e+08	1.27969e+08	1.5225e+08	1.20501e+08	3.62321e+07	1.65666e+08	5.21226e+07	1.14852e+08	1.43927e+08	8.57027e+07	5.90375e+07	1.5225e+08	1.02851e+08	2.01764e+07	1.49049e+08	1
High	Master Protein	B2R9L6	cDNA, FLJ94450, highly similar to Homo sapiens cyclin-dependent kinase 9 (CDC2-related kinase) (CDK9), mRNA [OS=Homo sapiens]	0	15.885	11	4	24	3	372	42.7	8.79	197	26.95	2	4	Pf00069, Pf07714	1025		CDK9	1.273	0.842	0.624	0.408263	0.842573	0.159219	42.18	38.22	23.61	1.02373e+06	937956	1.12453e+06	1.07027e+06	1.47618e+06	1.65001e+06	1.00474e+06	949611	1.3526e+06	446902	799368	1.10841e+06	650030	681021	1.65001e+06	857571	528804	1.21692e+06	1
Medium	Master Protein	B2R9M7	Protein kinase C epsilon type [OS=Homo sapiens]	0.021	1.031	1	1	3	1	737	83.6	7.12	0		1		Pf00069, Pf00130, Pf00168, Pf00433, Pf07714	5581		PRKCE	0.903	0.483	0.535	0.564815	0.0744795	0.0213368	97.71	15.44	25.5	4.21856e+06	2.34698e+06	3.57611e+06	3.2289e+06	6.18978e+06	406092	1.7277e+06	2.49878e+06	689882	1.84158e+06	2.0002e+06	3.52485e+06	1.96107e+06	2.8556e+06	406092	1.47463e+06	1.39148e+06	620683	1	Oxidation [K682; P683; K686]
High	Master Protein	B2R9U5	cDNA, FLJ94560, highly similar to Homo sapiens homeo box A11 (HOXA11), mRNA [OS=Homo sapiens]	0	6.017	12	3	9	1	313	34.4	8.7	0	1.61	3	3	Pf00046, Pf12045	3207		HOXA11	0.759	0.988	1.313	0.291454	0.953235	0.387085	17.35	54.84	46.53	475650	444181	594510	360970	381693	268475	358083	1.5868e+06	292151	207642	378550	585988	219235	176090	268475	305632	883632	262847	1
High	Master Protein	B2RA56	Nicalin [OS=Homo sapiens]	0	149.855	36	15	173	15	552	61.7	7.49	3224	250.45	15	15	Pf04389, Pf05450	56926		NCLN	0.855	0.658	0.841	0.360775	0.461584	0.815084	29.21	27.79	46.32	3.36003e+07	2.80573e+07	2.12542e+07	2.57358e+07	2.7387e+07	1.38636e+07	2.39691e+07	1.02662e+07	1.86489e+07	1.4668e+07	2.39116e+07	2.09495e+07	15630658	1.26347e+07	1.38636e+07	2.04582e+07	5.71688e+06	1.67783e+07	1
High	Master Protein	B2RAD8	cDNA, FLJ94852, highly similar to Homo sapiens eukaryotic translation initiation factor 2C, 1 (EIF2C1), mRNA [OS=Homo sapiens]	0	50.982	9	7	54	4	857	97.2	9.16	643	60.09	7	7	Pf02170, Pf02171, Pf08699	26523		AGO1; EIF2C1	1.007	0.835	0.904	0.90736	0.950672	0.903738	26.22	52.79	54.12	2.83393e+06	3.46421e+06	3.72068e+06	3.14469e+06	3.30486e+06	4.66922e+06	3.30046e+06	419170	3.7988e+06	1.23713e+06	2.95235e+06	3.66735e+06	1.90993e+06	1.52466e+06	4.66922e+06	2.81702e+06	233421	3.41776e+06	1
High	Master Protein	B2RAH2	Sodium/hydrogen exchanger [OS=Homo sapiens]	0.003	2.482	2	1	1	1	815	90.7	7.21	0		1		Pf00999	6548		SLC9A1	1.201	0.83	0.764	0.631581	0.737199	0.495333	24.31	7.77	18.21	318239	294010	187034	319549	404856	224631	243998			138925	250568	184353	194078	186776	224631	208258			1
High	Master Protein	B2RAI2	cDNA, FLJ94931, highly similar to Homo sapiens zinc finger protein 148 (pHZ-52) (ZNF148), mRNA [OS=Homo sapiens]	0	9.517	3	2	12	2	794	88.9	6.48	110	12.61	2	2	Pf00096, Pf13465	7707		ZNF148	1.232	0.847	0.75	0.511073	0.768962	0.496092	27.2	18.97	12.64	319267	285980	449349	736774	794778	347991	242118	285344	94096.7	139374	243724	442908	447480	366664	347991	206653	158898	84658.4	1
High	Master Protein	B2RAJ6	cDNA, FLJ94957, highly similar to Homo sapiens phosphoinositide-3-kinase, regulatory subunit 4, p150 (PIK3R4), mRNA [OS=Homo sapiens]	0	9.394	3	4	15	4	1358	153.1	7.17	78	1.64	4	3	Pf00069, Pf00400	30849		PIK3R4	0.955	0.953	1.01	0.80605	0.937224	0.784842	28.85	37.55	27.74	625910	689237	905950	640126	758834	795190	767812	590171	911655	273237	587398	892963	388780	350081	795190	655345	328645	820212	1
High	Master Protein	B2RAK1	cDNA, FLJ94965, highly similar to Homo sapiens leucyl/cystinyl aminopeptidase (LNPEP), mRNA [OS=Homo sapiens]	0	39.346	9	9	52	9	1025	117.3	5.73	337	31.93	9	9	Pf01433, Pf11838, Pf13485	4012		LNPEP	1.205	0.753	0.748	0.319655	0.701516	0.425729	39.15	22.48	27.24	4.43481e+06	3.8593e+06	3.16392e+06	4.44944e+06	5.95683e+06	2.24637e+06	3.43841e+06		1.94738e+06	1.93598e+06	3.28907e+06	3.11857e+06	2.70237e+06	2.74813e+06	2.24637e+06	2.93476e+06		1.75205e+06	1
High	Master Protein	B2RAM6	cDNA, FLJ95005, highly similar to Homo sapiens kinesin family member 11 (KIF11), mRNA [OS=Homo sapiens]	0	25.951	6	5	17	5	1056	119.1	5.72	53	11.32	5	4	Pf00225, Pf13931	3832		KIF11	0.597	0.637	1.012	0.0214252	0.358776	0.764992	10.94	22.67	62.69	1.08528e+06	1.34966e+06	2.32778e+06	804542	1.10699e+06	820405	525432	998935	2.06633e+06	473770	1.15024e+06	2.29441e+06	488638	510700	820405	448468	556271	1.85906e+06	1
High	Master Protein	B2RAQ8	cDNA, FLJ95058, highly similar to Homo sapiens carnitine palmitoyltransferase 1A (liver) (CPT1A),nuclear gene encoding mitochondrial protein, mRNA [OS=Homo sapiens]	0	39.042	9	5	18	5	773	88.3	8.59	304	9.18	5	5	Pf00755	1374		CPT1A	100	100	1.431	1e-17	1e-17	0.1304			114.76				772657	836249	652115	3.02306e+06	146471	698384				469273	385796	652115	2.58025e+06	81564.4	628333	1
High	Master Protein	B2RAT6	Galactose-1-phosphate uridylyltransferase [OS=Homo sapiens]	0	32.789	12	4	19	4	379	43.3	6.99	198	25.11	3	4	Pf01087, Pf02744	2592		GALT	0.938	1.573	1.424	0.726653	0.0971162	0.0410381	36.16	58.42	60.27	927891	1.28275e+06	1.7676e+06	1.26492e+06	1.48356e+06	1.691e+06	2.33708e+06	186870	2.30596e+06	405064	1.09321e+06	1.74226e+06	768249	684428	1.691e+06	1.99475e+06	104061	2.07466e+06	1
High	Master Protein	B2RAV0	cDNA, FLJ95135 [OS=Homo sapiens]	0	6.794	2	1	6	1	791	83.2	9.42	84	4.03	1	1	Pf12695	55683		KANSL3	0.913	0.918	0.924	0.616602	0.862056	0.894415	14.43	54.92	49.8	167119	160009	206958	149046	185076		153450	82367.8	236865	72954.4	136367	203992	90523.3	85383.3		130973	45867.7	213106	1
High	Master Protein	B2RAW9	cDNA, FLJ95165, highly similar to Homo sapiens LIM domain kinase 2 (LIMK2), transcript variant 2b,mRNA [OS=Homo sapiens]	0.002	2.942	2	1	9	1	617	69.8	7.42	14	5.67	1	1	Pf00069, Pf00412, Pf00595, Pf07714, Pf13180	3985		LIMK2																												1
High	Master Protein	B2RB06	cDNA, FLJ95242, highly similar to Homo sapiens L-3-hydroxyacyl-Coenzyme A dehydrogenase, short chain (HADHSC), mRNA [OS=Homo sapiens]	0	199.547	60	15	347	15	314	34.2	8.85	3344	362.62	15	15	Pf00725, Pf01210, Pf01266, Pf02737, Pf13450	3033		HADH	0.841	0.71	0.765	0.221343	0.629917	0.770727	46.23	56.03	59.73	6.01091e+07	5.25381e+07	4.12277e+07	4.56453e+07	4.17072e+07	4.04004e+07	4.74198e+07	8.63592e+06	3.49477e+07	2.62402e+07	4.47753e+07	4.06367e+07	2.77227e+07	1.92412e+07	4.04004e+07	4.04739e+07	4.80904e+06	3.14423e+07	1
High	Master Protein	B2RB33	cDNA, FLJ95281, highly similar to Homo sapiens a disintegrin-like and metalloprotease (reprolysintype) with thrombospondin type 1 motif, 1 (ADAMTS1), mRNA [OS=Homo sapiens]	0.002	2.528	2	1	2	1	950	103.3	6.68	15	0	1	1	Pf00090, Pf01421, Pf01562, Pf05986, Pf13574, Pf13582, Pf13583, Pf13688	9510		ADAMTS1																												1
High	Master Protein	B2RB47	AMP deaminase [OS=Homo sapiens]	0	41.323	10	8	36	8	879	100.7	6.93	277	30.99	8	8	Pf00962	271		AMPD2	1.362	1.538	1.087	0.11578	0.0884028	0.316665	40.25	50.62	65.56	1.74995e+06	2.40016e+06	3.17767e+06	3.00679e+06	2.70156e+06	5.95113e+06	3.87801e+06	81407.1	5.08357e+06	763930	2045522	3.13213e+06	1.82618e+06	1.24634e+06	5.95113e+06	3.30998e+06	45332.7	4.57366e+06	1
High	Master Protein	B2RB57	cDNA, FLJ95321, highly similar to Homo sapiens ATG7 autophagy related 7 homolog (S. cerevisiae) (ATG7), mRNA [OS=Homo sapiens]	0	21.687	6	3	20	3	703	77.9	6.24	294	14.92	3	3	Pf00899	10533		ATG7	0.919	0.829	0.997	0.722805	0.756927	0.855012	35.14	32.2	49.28	347864	609908	835747	497468	474674	771048	506125	251055	786059	151858	519790	823767	302137	218986	771048	431990	139804	707213	1
High	Master Protein	B2RBC8	cDNA, FLJ95444, highly similar to Homo sapiens polycystic kidney disease 1-related (PKD1-like), mRNA [OS=Homo sapiens]	0	21.981	5	4	10	4	1049	115.5	6.11	139	5.88	4	4	Pf02010	79932		KIAA0319L	1.066	0.781	0.706	0.861048	0.651296	0.366189	34.2	50.22	33.71	692817	551675	162147	632362	680148	531905	563378	2.72849e+06	196970	302444	470162	159823	384065	313780	531905	480856	1.5194e+06	177213	1
High	Master Protein	B2RBE0	cDNA, FLJ95462, highly similar to Homo sapiens fatty-acid-Coenzyme A ligase, long-chain 3 (FACL3),mRNA [OS=Homo sapiens]	0	363.537	56	28	412	24	720	80.3	8.46	6020	564.38	26	28	Pf00501	2181		ACSL3	0.895	0.599	0.721	0.404054	0.293419	0.514082	33.81	16.5	28.89	5.77664e+07	5.70825e+07	4.54206e+07	5.45545e+07	4.66964e+07	3.57989e+07	3.84046e+07	2.39012e+07	4.09656e+07	2.52175e+07	4.86482e+07	4.47695e+07	3.31337e+07	2.15429e+07	3.57989e+07	3.27792e+07	1.33097e+07	3.68566e+07	1	Acetyl [N-Term]
High	Master Protein	B2RBE5	cDNA, FLJ95468, highly similar to Homo sapiens transcriptional coactivator tubedown-100 (TBDN100),transcript variant 1, mRNA [OS=Homo sapiens]	0	149.717	27	21	209	21	866	101.2	7.42	1504	172.21	21	21	Pf12569, Pf13414	80155		NAA15	0.963	0.707	0.762	0.771822	0.621299	0.760807	36.7	24.16	34.39	2.36209e+07	2.64331e+07	2.83587e+07	2.6926e+07	2.7739e+07	2.73515e+07	2.68312e+07	1.2453e+07	2.84163e+07	1.03115e+07	2.25275e+07	2.79522e+07	1.63535e+07	1.27971e+07	2.73515e+07	2.2901e+07	6.93464e+06	2.5566e+07	1
High	Master Protein	B2RBI2	cDNA, FLJ95525, highly similar to Homo sapiens synapse associated protein 1, SAP47 homolog (Drosophila) (SYAP1), mRNA [OS=Homo sapiens]	0.001	3.835	6	1	2	1	352	39.9	4.53	17	0	1	1	Pf03909	94056		SYAP1	3.017	4.243	1.647	0.000124752	0.000901876	0.0684554	48.43	47.46	51.34	215393	148242	160519	484275	301135	703404	530631		1.08314e+06	94028.3	126338	158218	294124	138926	703404	452906		974494	1
High	Master Protein	B2RBY4	DNA primase [OS=Homo sapiens]	0.003	2.407	2	1	2	1	420	49.9	8.38	19	0	1	1	Pf01896	5557		PRIM1																												1
High	Master Protein	B2RC06	cDNA, FLJ95791, highly similar to Homo sapiens aurora kinase B (AURKB), mRNA [OS=Homo sapiens]	0	11.645	12	3	7	3	344	39.3	9.36	21	0	3	2	Pf00069, Pf07714	9212		AURKB	0.723	2.358	2.779	0.220172	0.061121	0.00301243	15.49	46.84	21.88	287646	192787	233068	159173	221232			542600		125570	164301	229728	96673.8	102063			302155		1
High	Master Protein	B2RCG5	Flavin-containing monooxygenase [OS=Homo sapiens]	0	19.11	9	5	12	5	532	60.3	7.4	92	6.78	5	5	Pf00743, Pf13434, Pf13450, Pf13738	2326		FMO1	100	100	2.83	1e-17	1e-17	4.52916e-07			96.99				379460	1.13927e+06	2.40688e+06	6.86945e+06		326083				230465	525592	2.40688e+06	5.86324e+06		293375	1
High	Master Protein	B2RCJ6	cDNA, FLJ96114, highly similar to Homo sapiens bromodomain and WD repeat domain containing 2 (BRWD2), mRNA [OS=Homo sapiens]	0	19.845	4	5	26	5	1224	136.7	6.92	161	17.34	5	5		55717		WDR11	1.507	1.152	0.78	0.107109	0.510519	0.657835	25.07	61.97	38	846550	1.13801e+06	923290	1.37292e+06	1.49682e+06	1.49302e+06	1.43971e+06	386827	1.23212e+06	369555	969862	910055	833844	690546	1.49302e+06	1.22883e+06	215410	1.10853e+06	1
High	Master Protein	B2RCM5	cDNA, FLJ96160, highly similar to Homo sapiens EGF-containing fibulin-like extracellular matrix protein 2 (EFEMP2), mRNA [OS=Homo sapiens]	0	98.622	23	9	90	9	443	49.3	4.94	1423	92.74	9	9	Pf07645, Pf12662, Pf12947, Pf14670	30008		EFEMP2	1.605	1.14	0.712	0.00626108	0.247244	0.41106	61.24	92.99	41.53	6.78261e+06	7.90344e+06	4.1236e+06	8.63857e+06	9.92742e+06	1.35722e+07	7.99941e+06	3.29228e+06	1.02967e+07	2.9609e+06	6.73566e+06	4.06449e+06	5.24664e+06	4.57992e+06	1.35722e+07	6.82768e+06	1.83335e+06	9.26393e+06	1
High	Master Protein	B2RCQ6	cDNA, FLJ96222, highly similar to Homo sapiens betaine-homocysteine methyltransferase (BHMT), mRNA [OS=Homo sapiens]	0	37.768	17	4	8	4	406	44.9	7.24	152	9.65	4	4	Pf02574	635		BHMT	100	100	7.576	1e-17	1e-17	1e-17			18.44					60528.7	227461	2.60403e+06							27924.4	227461	2222604			1
High	Master Protein	B2RCT6	cDNA, FLJ96276, highly similar to Homo sapiens G1 to S phase transition 1 (GSPT1), mRNA [OS=Homo sapiens]	0	154.653	41	14	185	14	499	55.7	5.62	1857	278.41	13	14	Pf00009, Pf03143, Pf03144	2935		GSPT1	0.931	0.953	0.973	0.679087	0.610249	0.311068	34.04	40.59	34.94	1.393e+07	2.00305e+07	2.44398e+07	1.67701e+07	1.47145e+07	2.37339e+07	2.23138e+07	1.45806e+07	2.39321e+07	6.08105e+06	1.70708e+07	2.40895e+07	1.01853e+07	6.78838e+06	2.37339e+07	1.90453e+07	8.11944e+06	2.15316e+07	1
High	Master Protein	B2RCX0	cDNA, FLJ96345, Homo sapiens SET translocation (myeloid leukemia-associated) (SET),mRNA [OS=Homo sapiens]	0	147.097	34	13	194	1	277	32.1	4.22	2199	248.94	13	13	Pf00956	6418		SET																												1
High	Master Protein	B2RD19	cDNA, FLJ96419, highly similar to Homo sapiens fructosamine-3-kinase-related protein (FN3KRP), mRNA [OS=Homo sapiens]	0	27.244	11	2	20	2	309	34.3	7.33	201	25.32	2	2	Pf01636, Pf03881	79672		FN3KRP	1.118	1.188	0.941	0.685897	0.432531	0.761447	34.27	66.94	93.67	1.16479e+06	1.17233e+06	1.69227e+06	1.37392e+06	1.19075e+06	2.19437e+06	1.92129e+06	205338	1.9822e+06	508482	999114	1.66801e+06	834450	549341	2.19437e+06	1.63986e+06	114346	1.78337e+06	1
High	Master Protein	B2RD40	cDNA, FLJ96442, highly similar to Homo sapiens copine II (CPNE2), mRNA [OS=Homo sapiens]	0	12.92	7	3	20	2	532	59.7	5.99	214	22.75	3	3	Pf00168, Pf07002, Pf10138	221184		CPNE2	0.872	0.798	0.869	0.528479	0.64375	0.718579	13.55	27.79	31.67	150100	172166	184482	130945	141613	178286	98289.6		179206	65525.2	146728	181837	79529.4	65331.8	178286	83892.5		161230	1
High	Master Protein	B2RDE1	cDNA, FLJ96568, highly similar to Homo sapiens tropomyosin 3 (TPM3), mRNA [OS=Homo sapiens]	0	186.455	48	18	316	6	248	29	4.75	3811	392.4	17	18	Pf00261, Pf12718	7170		TPM3	0.777	0.47	0.642	0.086148	0.0618257	0.175007	24.85	20.78	41.78	1.11421e+08	1.29213e+08	1.39884e+08	1.13705e+08	1.06536e+08	1.02771e+08	1.04491e+08	2.84976e+06	1.023e+08	4.86399e+07	1.10121e+08	137879165	6.90589e+07	4.91495e+07	1.02771e+08	8.91851e+07	1.58693e+06	9.20388e+07	1
High	Master Protein	B2RDE8	cDNA, FLJ96580, highly similar to Homo sapiens hepatoma-derived growth factor (high-mobility group protein 1-like) (HDGF), mRNA [OS=Homo sapiens]	0	157.191	52	13	245	11	240	26.8	4.67	2264	316.42	13	12	Pf00855	3068		HDGF	0.907	0.823	0.809	0.433845	0.985138	0.983716	33.8	76.45	76.24	3.17961e+07	3.89488e+07	4.55514e+07	3.87055e+07	3.2278e+07	5.8674e+07	5.89683e+07	1.80987e+06	4.79606e+07	1.38804e+07	3.31939e+07	4.48985e+07	2.35078e+07	1.48912e+07	5.8674e+07	5.03308e+07	1.00785e+06	4.31499e+07	1
High	Master Protein	B2RDR2	cDNA, FLJ96730, highly similar to Homo sapiens sorting nexin 15 (SNX15), transcript variant A, mRNA [OS=Homo sapiens]	0.001	3.925	4	1	9	1	342	38.3	5.19	38	6.81	1	1	Pf00787, Pf04212	29907		SNX15	1.305	1.595	1.405	0.392509	0.275358	0.270561	28.16	60.15	48.01	202379	284484	305314	322785	274136	398456	600538	96300.5	453631	88347.2	242450	300938	196044	126470	398456	512573	53626.3	408129	1
High	Master Protein	B2RDT9	cDNA, FLJ96765 [OS=Homo sapiens]	0	7.568	7	2	4	2	348	39.4	5.11	44	0	2	2	Pf12171, Pf12874	91603		ZNF830	1.071	0.581	0.528	0.855135	0.296518	0.0876707	29.34	4.1	3.68	449476	457631	572815	585345	534835	319549	266479		107214	196215	390013	564604	355509	246741	319549	227446		96460	1
High	Master Protein	B2RDU2	cDNA, FLJ96768, Homo sapiens non-SMC (structural maintenance of chromosomes)element 1 protein (NSE1), mRNA [OS=Homo sapiens]	0	15.025	13	2	10	2	256	29.7	7.02	65	3.57	2	2	Pf07574, Pf08746	197370		NSMCE1	0.99	1.108	1.136	0.843739	0.797374	0.647964	14.63	15.64	40.15	307907	162787	293887	375894	298292	255197	299078	456224	333490	134415	138735	289674	228299	137614	255197	255270	254055	300039	1
High	Master Protein	B2RDW0	cDNA, FLJ96792, highly similar to Homo sapiens calmodulin 2 (phosphorylase kinase, delta) (CALM2), mRNA [OS=Homo sapiens]	0	37.725	22	2	12	2	149	16.8	4.22	206	20.25	2	2	Pf00036, Pf08726, Pf12763, Pf13202, Pf13405, Pf13499, Pf13833, Pf14658	805		CALM2	0.743	1.804	0.576	0.244467	0.074826	0.107555	33.23	131.53	47.18	483110	904582	670532	399591	359098	4.03793e+06	1.20982e+06	98346.1	2.32746e+06	210898	770924	660920	242692	165666	4.03793e+06	1.03261e+06	54765.4	2.094e+06	1
High	Master Protein	B2RE59	cDNA, FLJ93148, highly similar to Homo sapiens RCD1 required for cell differentiation1 homolog (S. pombe) (RQCD1), mRNA [OS=Homo sapiens]	0	32.291	20	4	15	4	299	33.6	8.03	106	17.17	3	4	Pf04078	9125		RQCD1; CNOT9	0.996	0.969	0.88	0.858373	0.844123	0.996586	43.12	40.4	32.08	566497	1.01153e+06	1.96908e+06	524758	960191	2.18923e+06	1.29244e+06	1.02997e+06	1.93728e+06	247300	862069	1.94086e+06	318712	442975	2.18923e+06	1.10313e+06	573556	1742961	1	Acetyl [N-Term]
Medium	Master Protein	B2RG90	MHC class II antigen [OS=Homo sapiens]	0.015	1.347	14	1	2	1	183	21.4	6.29	0	0	1	1	Pf00969, Pf07654	3123		HLA-DRB1	1.451	1.27	0.511	0.20819	0.592985	0.0659143	47.47	82.72	12.41	86244.1	272422	309018	285638		420991	152988	139213	392544	37649.2	232170	304588	173482		420991	130579	77522.5	353170	1	Oxidation [P103; P119]
High	Master Protein	B2RMQ4	Cytoskeleton associated protein 2 [OS=Homo sapiens]	0	8.119	4	2	4	2	682	76.8	9.41	48	2.26	2	2	Pf08542, Pf15297	26586		CKAP2	0.413	2.456	5.883	0.00289798	0.0341744	2.70161e-07	2.98	7.74	8.25	380743	357386	533643	101127	113022			965014		166211	304580	525993	61419.4	52141.6			537382		1
High	Master Protein	B2RNR6	zinc finger RNA binding protein [OS=Homo sapiens]	0	124.522	20	17	132	16	1074	116.9	9.04	1622	118.02	16	17	Pf07528, Pf12171, Pf12874	51663		ZFR	1.128	0.941	0.78	0.46002	0.601469	0.791056	40.92	40.09	31.59	1.2041e+07	1.06604e+07	1.07236e+07	1.32598e+07	1.18076e+07	9.41854e+06	1.04555e+07	6.84327e+06	1.16789e+07	5.25642e+06	9.08525e+06	1.05699e+07	8.05335e+06	5.44734e+06	9.41854e+06	8.924e+06	3.81077e+06	1.05074e+07	1	Oxidation [P624]
High	Master Protein	B2RTS4	centrosomal protein 170kDa [OS=Homo sapiens]	0	5.034	2	2	10	2	1486	164.5	7.24	18	0	2	2	Pf00498, Pf15308	9859		CEP170	0.808	0.81	1.049	0.370003	0.716509	0.71024	19.25	19.14	29.26	244842	731874	297580	284066	562689	1.07502e+06	571037	978163	1.33212e+06	106884	623735	293315	172528	259592	1.07502e+06	487393	544704	1.19851e+06	1
High	Master Protein	B2RTX8	WAPAL protein [OS=Homo sapiens]	0	41.084	10	7	26	7	1184	132.1	5.48	225	19.47	7	7	Pf07814	23063		WAPAL; WAPL	0.978	0.871	0.866	0.883902	0.934436	0.949928	33.63	36.97	32.32	1.41306e+06	1.67666e+06	2.15076e+06	2.35305e+06	1.69447e+06	1.7385e+06	925562	1.35114e+06	1.56891e+06	616862	1.42892e+06	2.11993e+06	1.42912e+06	781729	1.7385e+06	789989	752404	1.41154e+06	1
High	Master Protein	B2RUU3	Dedicator of cytokinesis 1 [OS=Homo sapiens]	0	19.346	3	5	12	5	1865	215.2	7.49	66	2.16	5	5	Pf00018, Pf06920, Pf07653, Pf14429, Pf14604	1793		DOCK1	0.983	0.828	0.796	0.801534	0.948474	0.604971	34.4	45.03	48.24	2.51862e+06	3.65514e+06	4.60741e+06	2.5541e+06	2.36584e+06	4.54682e+06	3.65618e+06	609569	3.95834e+06	1.09948e+06	3.11507e+06	4.54136e+06	1.55123e+06	1.09146e+06	4.54682e+06	3.12063e+06	339447	3.5613e+06	1
High	Master Protein	B2RUZ4	small integral membrane protein 1 [OS=Homo sapiens]	0	16.976	44	2	8	2	78	8.7	9.03	37	15.95	1	2		388588	ENSG00000235169.7	SMIM1	3.211	5.392	1.542	0.000589161	6.87316e-05	0.0952989	37.29	101.48	93.19	161009	203306	120516	386989	431339	774143	2.28516e+06		378970	70287.3	173266	118788	235037	198994	774143	1.95044e+06		340957	1	Acetyl [N-Term]
High	Master Protein	B2RWN5	HEAT repeat containing 1 [OS=Homo sapiens]	0	144.368	16	28	69	28	2144	242.1	6.55	736	38.67	28	26	Pf08146, Pf12397	55127		HEATR1	0.862	1.579	1.198	0.382832	0.100524	0.198868	24.4	119.76	102.56	3.92667e+06	3.11465e+06	3.54577e+06	2.61755e+06	3.66402e+06	587803	1.65745e+06	4.85956e+07	461702	1.71416e+06	2.65444e+06	3.49495e+06	1.58977e+06	1.69036e+06	587803	1.41468e+06	2.70612e+07	415391	1
High	Master Protein	B2XL43	Cytochrome c oxidase subunit 2 [OS=Homo sapiens]	0	38.439	23	5	64	4	227	25.5	4.82	652	125.93	2	5	Pf00116, Pf02790				0.767	0.72	0.723	0.135169	0.716771	0.464094	44.25	32.59	41.59	1.9156e+07	1.94989e+07	1.1645e+07	1.48461e+07	2.14352e+07	5.78224e+06	1.4307e+07	9.97165e+06	5.47639e+06	8.36242e+06	1.66178e+07	1.1478e+07	9016784	9.88891e+06	5.78224e+06	1.22113e+07	5.55285e+06	4.92708e+06	1
High	Master Protein	B2ZPJ8	bone morphogenetic protein 7 [OS=Homo sapiens]	0	17.386	11	4	7	4	402	46.1	7.3	77	4.35	4	3	Pf00019, Pf00688	655		BMP7	1.115	1.015	0.655	0.731154	0.895973	0.295051	20.26	63.76	22.79	477790	495085	330300	590108	928823	311478	528891	801020	333901	208576	421933	325566	358402	428504	311478	451421	446059	300409	1
High	Master Protein	B2ZZ87	NEDD4 binding protein 2 [OS=Homo sapiens]	0	32.355	3	3	14	3	1690	189.7	5.26	193	16.91	3	3	Pf01713, Pf08590, Pf13671	55728		N4BP2	1.164	0.902	0.712	0.638704	0.89129	0.384027	44.86	56.02	32.5	855078	440285	773247	866602	960841	1.07162e+06	392611	364397	1.11744e+06	373278	375230	762163	526331	443275	1.07162e+06	335103	202920	1.00535e+06	1
High	Master Protein	B3KM26	cDNA FLJ10050 fis, clone HEMBA1001257, highly similar to Alpha-methylacyl-CoA racemase [OS=Homo sapiens]	0	50.478	27	7	34	7	382	42.4	6.7	418	40.79	7	7	Pf02515	23600		AMACR	3.084	5.765	1.625	1.03237e-06	3.8445e-07	0.00848463	49.45	111.4	109.74	1.09594e+06	666265	570119	2.18225e+06	2.913e+06	4.64064e+06	1.10656e+07	28733.5	1.91731e+06	478425	567820	561947	1.32539e+06	1.34389e+06	4.64064e+06	9.44477e+06	16000.7	1.725e+06	1
High	Master Protein	B3KM34	cDNA FLJ10132 fis, clone HEMBA1003046, highly similar to Mitochondrial-processing peptidase subunit beta, mitochondrial [OS=Homo sapiens]	0	93.84	28	12	213	11	489	54.4	6.83	2169	217.46	12	12	Pf00675, Pf05193	9512		PMPCB	0.974	0.757	0.838	0.855158	0.789915	0.877008	34.04	41.35	43.2	2.35854e+07	1.87415e+07	1.60807e+07	1.92683e+07	1.74426e+07	1.6568e+07	2.15525e+07	7.65531e+06	1.78364e+07	1.02961e+07	1.59723e+07	1.58502e+07	1.17026e+07	8.04697e+06	1.6568e+07	1.83955e+07	4.26297e+06	1.60474e+07	1
High	Master Protein	B3KM53	cDNA FLJ10329 fis, clone NT2RM2000594, highly similar to DNA (cytosine-5)-methyltransferase 3B [OS=Homo sapiens]	0	55.129	31	11	29	10	489	55.3	8.54	278	15.08	10	11	Pf00145	1789		DNMT3B	0.899	1.91	2.002	0.597196	0.0641421	0.013535	45.96	121.66	107.08	1.37857e+06	897494	770587	554909	884648	434462	613069	8.35049e+06	308199	601804	764884	759541	337024	408124	434462	523269	4.65009e+06	277285	1
High	Master Protein	B3KM57	cDNA FLJ10347 fis, clone NT2RM2001035, highly similar to CCR4-NOT transcription complex subunit 7 [OS=Homo sapiens]	0	14.028	7	1	4	1	285	32.8	4.89	72	7.8	1	1	Pf04857	29883		CNOT7	2.033	1.415	0.388	0.0102648	0.279714	0.00163236	60.74	108.59	19.9	358917	608006	755531	1.01301e+06	729723	5.40279e+06	860058	230105	2.09794e+06	156683	518169	744701	615253	336651	5.40279e+06	734080	128137	1.88751e+06	1
High	Master Protein	B3KM89	cDNA FLJ10528 fis, clone NT2RP2000943, highly similar to Protein transport protein Sec24D [OS=Homo sapiens]	0	50.338	10	7	64	7	906	100.2	6.93	730	62.98	7	7	Pf00626, Pf04810, Pf04811, Pf04815, Pf08033	9871		SEC24D	1.419	1.066	0.8	0.0633788	0.542718	0.631483	40.91	66.64	46.79	1.61943e+06	2.65808e+06	2.91171e+06	3.2354e+06	3.34266e+06	4.33023e+06	3.27275e+06	645037	3.55442e+06	706949	2.26534e+06	2.86997e+06	1.96502e+06	1.54211e+06	4.33023e+06	2.79337e+06	359198	3.19789e+06	1
High	Master Protein	B3KM97	cDNA FLJ10554 fis, clone NT2RP2002385, highly similar to Synaptic glycoprotein SC2 [OS=Homo sapiens]	0	121.953	40	13	240	13	308	36	9.5	1809	272.87	13	12	Pf02544	9524		TECR	0.792	0.461	0.769	0.110692	0.052699	0.8034	40.25	13	50.67	6.55805e+07	5.62713e+07	4.04363e+07	4.73731e+07	5.69863e+07	2.57941e+07	3.80176e+07	1.87069e+07	3.10992e+07	2.86287e+07	4.79569e+07	3.98566e+07	2.87721e+07	2.62901e+07	2.57941e+07	3.24489e+07	1.04172e+07	2.79798e+07	1
High	Master Protein	B3KMB1	Structural maintenance of chromosomes protein [OS=Homo sapiens]	0	143.751	20	21	128	21	1197	135.5	8.43	1427	128.79	21	21	Pf01576, Pf02463, Pf03962, Pf04111, Pf05262, Pf05622, Pf06470, Pf08317, Pf09726, Pf09731, Pf10174, Pf10186, Pf12128, Pf12718, Pf13166, Pf13175, Pf13304, Pf13476, Pf13555, Pf13863, Pf14362, Pf15619	10592		SMC2	0.797	0.632	0.86	0.205575	0.422103	0.776677	26.83	22.07	41.7	1.68278e+07	1.41179e+07	3.09955e+07	1.27469e+07	1.23669e+07	1.50818e+07	6.39494e+06	1.24008e+07	2.02959e+07	7.34605e+06	1.20319e+07	3.05512e+07	7.74186e+06	5.70533e+06	1.50818e+07	5.45823e+06	6.90555e+06	1.82601e+07	1
High	Master Protein	B3KMB3	cDNA FLJ10629 fis, clone NT2RP2005620, highly similar to Epsin-2 [OS=Homo sapiens]	0	19.508	9	3	14	3	484	52.9	7.52	160	10.7	3	3	Pf01417, Pf07651	22905		EPN2	1.035	0.811	0.832	0.996438	0.742854	0.708575	21.61	16.66	12.02	764278	798720	740530	806087	939609	737834	713183		582726	333640	680705	729914	489577	433480	737834	608718		524276	1
High	Master Protein	B3KMB8	cDNA FLJ10654 fis, clone NT2RP2005901, highly similar to FAST kinase domains-containing protein 2 [OS=Homo sapiens]	0	49.626	12	7	30	7	710	81.4	8.05	209	23.22	7	7	Pf06743, Pf08368, Pf08373	22868		FASTKD2	0.791	0.531	0.808	0.205412	0.147379	0.673685	22.35	11.16	40.43	4.73095e+06	2.35348e+06	3.79413e+06	1.90024e+06	1.53491e+06	2.38188e+06	2.00583e+06	2.1194e+06	2.38678e+06	2.06526e+06	2.00574e+06	3.73974e+06	1.15411e+06	708116	2.38188e+06	1.71202e+06	1.18022e+06	2.14738e+06	1
High	Master Protein	B3KMB9	cDNA FLJ10659 fis, clone NT2RP2006071, highly similar to DCC-interacting protein 13 beta [OS=Homo sapiens]	0	36.529	15	6	23	6	664	74.4	4.94	256	8.33	6	5	Pf00169, Pf00640	55198		APPL2	0.87	1.012	1.124	0.475902	0.699571	0.306263	40.07	46.87	54.18	1.34262e+06	2.2236e+06	2.58505e+06	1.94602e+06	1.71896e+06	1.89741e+06	2.35251e+06	615530	2.28058e+06	586113	1.89505e+06	2.548e+06	1.18191e+06	793027	1.89741e+06	2.00793e+06	342767	2.05183e+06	1
High	Master Protein	B3KMC9	cDNA FLJ10711 fis, clone NT2RP3000917, highly similar to 5'-3' exoribonuclease 2 [OS=Homo sapiens]	0	164.385	24	20	169	20	950	108.5	7.47	1585	174.87	20	18	Pf03159	22803		XRN2	1.059	0.834	0.782	0.813341	0.952289	0.861834	28.75	62.02	53.23	1.62661e+07	1.97084e+07	1.87705e+07	1.90987e+07	1.79208e+07	2.2001e+07	1.56941e+07	6.16627e+06	2.41789e+07	7.10085e+06	1.67963e+07	1.85014e+07	1.15996e+07	8.26759e+06	2.2001e+07	1.33953e+07	3.43377e+06	2.17536e+07	1
High	Master Protein	B3KMH8	Autophagy protein 5 [OS=Homo sapiens]	0	5.903	5	1	2	1	275	32.4	5.91	29	0	1	1	Pf04106	9474		ATG5	1.092	0.817	0.76	0.974857	0.671958	0.526448	28.85	26.83	21.92	84990.1	164192	166238	146217	181543	100426	134943	78059.9		37101.8	139931	163855	88804.7	83753.1	100426	115177	43468.8		1
High	Master Protein	B3KMP9	cDNA FLJ11884 fis, clone HEMBA1007194, highly similar to Origin recognition complex subunit 6 [OS=Homo sapiens]	0	19.912	11	2	14	2	252	28	8.66	191	17.66	2	2	Pf05460	23594		ORC6	0.658	0.973	1.409	0.0601818	0.837074	0.0715463	9.95	36.07	38.42	1.34073e+06	1.32237e+06	1.79051e+06	1.07866e+06	841521	640837	433237	1.27686e+06	1.78717e+06	585288	1.12698e+06	1.76485e+06	655126	388228	640837	369778	711038	1.60791e+06	1
High	Master Protein	B3KMQ6	cDNA FLJ12172 fis, clone MAMMA1000684, highly similar to Opioid growth factor receptor [OS=Homo sapiens]	0	12.139	6	2	18	2	677	73.3	4.84	198	22.84	2	2	Pf04652, Pf04664, Pf05616, Pf05887, Pf06333, Pf07174, Pf09786, Pf12238, Pf15325	11054		OGFR	1.256	1.565	1.345	0.598603	0.270434	0.288132	53.61	33.42	53.48	145832	188271	327916	298298	169730	795584	699237	228275	694249	63661.7	160453	323216	181172	78303.4	795584	596815	127118	624612	1
High	Master Protein	B3KMS0	condensin complex subunit 1 [OS=Homo sapiens]	0	139.781	17	20	121	20	1401	157.1	6.61	1378	88.08	20	17	Pf12717, Pf12922	9918		NCAPD2	0.673	0.554	0.86	0.0241705	0.225111	0.958416	21.94	22.53	53.31	6.67817e+06	8.79504e+06	1.2344e+07	6.13428e+06	7.69663e+06	3.51955e+06	2.89992e+06	6.4727e+06	7.4755e+06	2.91531e+06	7.49552e+06	1.21671e+07	3.72565e+06	3.55077e+06	3.51955e+06	2.47515e+06	3.60442e+06	6.72567e+06	1
High	Master Protein	B3KMV5	cDNA FLJ12728 fis, clone NT2RP2000040, highly similar to Protein FAM62A [OS=Homo sapiens]	0	171.185	24	20	219	20	1104	122.8	5.85	2988	218.63	20	20	Pf00168	23344		ESYT1	0.767	0.595	0.824	0.144694	0.281321	0.930826	21.13	23.78	43.49	2.70853e+07	2.40426e+07	2.09248e+07	1.97154e+07	2.01935e+07	1.65676e+07	2.36515e+07	7.97041e+06	1.81523e+07	1.18239e+07	2.04901e+07	2.06248e+07	1.19741e+07	9.3161e+06	1.65676e+07	2.01871e+07	4.43843e+06	1.63315e+07	1
High	Master Protein	B3KMV8	cDNA FLJ12766 fis, clone NT2RP2001520, highly similar to Calcium-binding mitochondrial carrier protein Aralar1 [OS=Homo sapiens]	0	151.033	30	19	192	10	678	74.7	8.38	2651	188.96	19	19	Pf00153, Pf13499	8604		SLC25A12	1.015	0.508	0.579	0.881604	0.143397	0.0594978	38.88	18.51	24.83	8.42582e+06	8.2029e+06	5.9982e+06	6.89914e+06	1.01068e+07	2.76588e+06	6.25814e+06	1.73713e+06	3.2784e+06	3.67823e+06	6.99087e+06	5.91222e+06	4.1902e+06	4.66266e+06	2.76588e+06	5.34147e+06	967344	2.94956e+06	1
High	Master Protein	B3KMX3	cDNA FLJ12857 fis, clone NT2RP2003513, highly similar to Homo sapiens paralemmin (PALM), transcript variant 2, mRNA [OS=Homo sapiens]	0	11.377	6	1	14	1	270	28.5	4.73	131	12.6	1	1	Pf03285	5064		PALM	1.287	1.497	0.965	0.377539	0.187678	0.637703	76.78	136.67	125.05	1.03016e+06	907518	648149	1.16767e+06	562969	6.92817e+06	1.35812e+06	106134	6.68552e+06	449707	773427	638858	709187	259720	6.92817e+06	1.15918e+06	59102.4	6014931	1
High	Master Protein	B3KMX6	cDNA FLJ12864 fis, clone NT2RP2003604, highly similar to Alpha-catulin [OS=Homo sapiens]	0	8.658	1	1	5	1	734	81.8	6.55	66	4.89	1	1	Pf01044	8727		CTNNAL1	0.809	0.804	1.014	0.211426	0.868381	0.479198	16.12	4.26	26.06	4.62454e+06	3.68457e+06	4.4192e+06	4.4202e+06	3.19392e+06	2979980	3.55351e+06	3.64397e+06	3.02226e+06	2.01881e+06	3.14016e+06	4355858	2.68461e+06	1.47349e+06	2979980	3.033e+06	2.0292e+06	2.71911e+06	1
High	Master Protein	B3KN06	Coronin [OS=Homo sapiens]	0	115.276	32	15	160	14	474	53.2	6.93	1907	180.35	15	14	Pf00400, Pf08953, Pf08954	23603		CORO1C	0.926	0.696	0.704	0.624245	0.584559	0.461762	44.46	28.25	30.94	3.8067e+07	3.25414e+07	2.16542e+07	3.59975e+07	2.87274e+07	1.46558e+07	1.9106e+07	7.69619e+06	2.27528e+07	1.66179e+07	2.77332e+07	2.13438e+07	2.18631e+07	1.32531e+07	1.46558e+07	1.63074e+07	4.28573e+06	2.04706e+07	1
High	Master Protein	B3KN09	cDNA FLJ13173 fis, clone NT2RP3003831, highly similar to Endonuclease G-like 1 [OS=Homo sapiens]	0	10.148	8	2	7	2	368	41.1	8.46	23	2.27	2	2	Pf01223	9941		EXOG	0.897	0.605	0.831	0.61345	0.28332	0.724653	27.22	47.52	58.23	1.45934e+06	1.09765e+06	1.02108e+06	1.03118e+06	1.30605e+06	306611	664259	25943.1	1.8358e+06	637064	935462	1.00644e+06	626285	602534	306611	566961	14446.8	1.65166e+06	1
High	Master Protein	B3KN15	cDNA FLJ13198 fis, clone NT2RP3004454, highly similar to Heparan sulfate 2-O-sulfotransferase 1 [OS=Homo sapiens]	0	28.86	18	5	40	5	356	41.8	8.69	376	29.74	5	5	Pf03567	9653		HS2ST1	0.84	0.537	0.583	0.284466	0.166593	0.0451605	37.79	16.39	22.83	5.68231e+06	4.48503e+06	3.23598e+06	3.8175e+06	5.12805e+06	1.22564e+06	3.07006e+06	830084	2.17902e+06	2.48057e+06	3.82234e+06	3.1896e+06	2.31856e+06	2.36578e+06	1.22564e+06	2.62036e+06	462244	1.96045e+06	1
High	Master Protein	B3KN49	cDNA FLJ13562 fis, clone PLACE1008080, highly similar to Homo sapiens hexamethylene bis-acetamide inducible 1 (HEXIM1), mRNA [OS=Homo sapiens]	0	18.132	8	2	8	2	359	40.6	4.89	215	9.88	2	2	Pf15313	10614		HEXIM1	0.995	1.107	1.067	0.94718	0.737008	0.715439	30.8	12.9	18.52	454393	500558	456705	467803	332141	401443	512985		382219	198362	426597	450159	284120	153230	401443	437845		343881	1
High	Master Protein	B3KNC3	cDNA FLJ14222 fis, clone NT2RP3003992, highly similar to Nucleolar complex protein 2 homolog [OS=Homo sapiens]	0	26.707	11	7	72	7	749	84.9	5.62	454	43.8	7	7	Pf03715	26155		NOC2L	1.093	1.09	0.954	0.583051	0.335855	0.522469	28.62	57.56	41.36	6.77676e+06	5.25346e+06	4.99721e+06	6.55956e+06	6.16087e+06	5.32317e+06	4.04451e+06	9.34823e+06	5.74035e+06	2.95835e+06	4.47723e+06	4.92558e+06	3.98395e+06	2.84226e+06	5.32317e+06	3.45208e+06	5.20569e+06	5.16456e+06	1
High	Master Protein	B3KND7	cDNA FLJ14378 fis, clone HEMBA1001804, highly similar to Zinc finger protein 281 [OS=Homo sapiens]	0	15.588	10	2	4	2	538	57.7	9.51	38	2.77	2	2	Pf13465	23528		ZNF281	1.129	2.202	1.95	0.929199	0.0973159	0.0651298	32.55	39.84	30.16	79718.7		135599	143680	95913.5			542959	124693	34800.6		133655	87264.1	44248.8			302354	112186	1
High	Master Protein	B3KNE7	cDNA FLJ14468 fis, clone MAMMA1000734, highly similar to Translocation protein SEC63 homolog [OS=Homo sapiens]	0	85.013	32	12	139	12	418	47.9	8.9	1412	180.71	12	12	Pf02889	11231		SEC63	0.809	0.526	0.631	0.235725	0.158674	0.12935	22.97	13.75	23.48	1.85027e+07	1.69615e+07	1.37137e+07	1.41235e+07	1.42461e+07	6.74315e+06	9.586e+06	5.12485e+06	9.43992e+06	8.07721e+06	1.44553e+07	1.35171e+07	8.57794e+06	6.57229e+06	6.74315e+06	8.18187e+06	2.85384e+06	8.49305e+06	1
High	Master Protein	B3KNH5	cDNA FLJ14622 fis, clone NT2RP2000147, highly similar to Adaptor-related protein complex 1 mu-1 subunit [OS=Homo sapiens]	0	106.854	33	10	93	10	423	48.5	7.3	1031	111.14	10	10	Pf00928	8907		AP1M1	1.129	0.959	0.746	0.458285	0.560017	0.592697	39.72	88.16	52.7	7.10167e+06	9.34121e+06	1.04688e+07	9.619e+06	9.41643e+06	1.40224e+07	1.19529e+07	997555	1.12676e+07	3.10018e+06	7.96099e+06	1.03187e+07	5.8421e+06	4.34418e+06	1.40224e+07	1.02021e+07	555503	1.01374e+07	1
High	Master Protein	B3KNK4	phosphatidate cytidylyltransferase [OS=Homo sapiens]	0	21.006	8	2	22	2	445	51.3	7.09	334	25.89	2	2	Pf01148	8760		CDS2	1.096	0.625	0.664	0.77219	0.346185	0.292039	83.89	17.63	35.52	537201	517541	322038	593251	567209	662016	376524		816046	234511	441071	317422	360311	261677	662016	321372		734193	1
High	Master Protein	B3KP18	cDNA FLJ30946 fis, clone FEBRA2007622, highly similar to RAD50-interacting protein 1 [OS=Homo sapiens]	0	13.348	5	4	13	4	792	90.5	5.45	53	3.34	4	4	Pf04437	60561		RINT1	1.015	0.544	0.529	0.990999	0.179418	0.0575798	28.77	12.93	18.08	1.14669e+06	1.10959e+06	1.08202e+06	948813	1.33953e+06	741291	726437	444783	581703	500581	945640	1.06651e+06	576262	617979	741291	620031	247684	523355	1
High	Master Protein	B3KP88	cDNA FLJ31415 fis, clone NT2NE2000284, highly similar to Galectin-3-binding protein [OS=Homo sapiens]	0	20.955	9	3	7	3	481	54.1	5.49	48	6.09	3	2	Pf00530, Pf07707	3959		LGALS3BP	1.418	3.019	2.369	0.226756	0.00820606	0.000430344	52.53	27.13	75.55	357467	598898	184022	730103	749103	1.03871e+06	1.91922e+06		361913	156050	510407	181384	443428	345592	1.03871e+06	1.6381e+06		325611	1
High	Master Protein	B3KPD3	cDNA FLJ31633 fis, clone NT2RI2003407, highly similar to Inner centromere protein [OS=Homo sapiens]	0	9.376	5	2	4	2	752	86.7	9.52	44	4.39	2	2	Pf12178	3619		INCENP	0.01	2.023	100	1e-17	0.153357	1e-17		141.68			79360.2						635100	68655.1		67634.2						353665	61768.6	1
High	Master Protein	B3KPN7	cDNA FLJ32002 fis, clone NT2RP7009394, highly similar to Exocyst complex component 2 [OS=Homo sapiens]	0	15.596	3	2	4	2	924	104.1	6.83	81	5.9	2	2	Pf01833, Pf15469	55770		EXOC2	1.425	1.145	0.801	0.219309	0.6901	0.659949	24.16	30.37	19.3	282745	438976	430503	499261	469369	647935	553123	300013	453950	123430	374115	424332	303226	216539	647935	472104	167067	408416	1
High	Master Protein	B3KPR5	cDNA FLJ32094 fis, clone OCBBF2000986, highly similar to Homo sapiens elongation factor Tu GTP binding domain containing 1, transcript variant 1, mRNA [OS=Homo sapiens]	0	16.455	8	5	14	5	857	96	6.43	95	2.5	5	5	Pf00679, Pf03764, Pf14492	79631		EFTUD1; EFL1	1.11	0.78	0.762	0.770854	0.637659	0.509177	36.06	28.03	23.86	492745	581302	858823	601086	824265	973979	634152	452786	848421	215104	495411	846512	365070	380267	973979	541263	252140	763320	1
High	Master Protein	B3KPV5	cDNA FLJ32300 fis, clone PROST2002227, highly similar to U3 small nucleolar ribonucleoprotein protein MPP10 [OS=Homo sapiens]	0	38.041	18	7	22	7	661	76.3	4.77	106	10.27	7	7	Pf04006	10199		MPHOSPH10	1.05	1.173	1.477	0.892536	0.677982	0.205126	34.03	73.08	95.12	451275	446749	614061	605074	540277	297739	339049	2.47817e+06	297280	197001	380739	605259	367492	249252	297739	289386	1.38e+06	267461	1
High	Master Protein	B3KPZ7	cDNA FLJ32517 fis, clone SMINT1000117, highly similar to Pyruvate dehydrogenase (lipoamide)-phosphatase 1 [OS=Homo sapiens]	0	48.838	15	6	47	6	535	60.8	6.74	597	36.98	6	6	Pf00481	54704		PDP1	0.945	0.822	0.869	0.760408	0.811023	0.917278	26.21	28.04	40.38	2.4617e+06	2.14109e+06	1.81111e+06	1.97739e+06	2.0847e+06	2.4073e+06	2.27348e+06	1.44286e+06	1.82731e+06	1.07464e+06	1.82473e+06	1.78515e+06	1.20097e+06	961756	2.4073e+06	1.94047e+06	803477	1.64403e+06	1
High	Master Protein	B3KQ21	cDNA FLJ32640 fis, clone SYNOV2001033, highly similar to U3 small nucleolar RNA-associated protein 6 homolog [OS=Homo sapiens]	0	32.26	13	7	16	7	597	70.2	7.46	118	11.02	7	7	Pf08640	55813		UTP6	0.756	1.35	1.762	0.291561	0.462191	0.072095	10.17	99.09	88.71	528433	335141	549926	563207	493270	476477	191022	5.09186e+06	419068	230684	285622	542043	342064	227565	476477	163042	2.83547e+06	377033	1
High	Master Protein	B3KQ33	cDNA FLJ32715 fis, clone TESTI2000784, highly similar to Importin-4 [OS=Homo sapiens]	0	46.733	11	9	46	9	1081	118.7	4.96	276	40.28	8	9	Pf01602, Pf02985, Pf13513, Pf13646	79711		IPO4	0.86	0.974	1.206	0.372419	0.593894	0.114191	34.33	43.58	21.15	2.71193e+06	5.00221e+06	5.82525e+06	2.92851e+06	3.50427e+06	4.24696e+06	4.33767e+06	4.62599e+06	4.44524e+06	1.18387e+06	4.26311e+06	5.74175e+06	1.77863e+06	1.61666e+06	4.24696e+06	3.70231e+06	2.57605e+06	3.99936e+06	1	Acetyl [N-Term]
High	Master Protein	B3KQ45	cDNA FLJ32798 fis, clone TESTI2002498, highly similar to Homo sapiens membrane protein, palmitoylated 7 (MAGUK p55 subfamily member 7) (MPP7), mRNA [OS=Homo sapiens]	0.001	3.165	2	1	1	1	576	65.5	7.14	0		1		Pf00018, Pf00595, Pf00625, Pf02828, Pf07653, Pf13180, Pf14604, Pf14685	143098		MPP7	1.95	2.863	1.32	0.0217499	0.0181993	0.312522	23.68	4.49	6.1	330202	204848	198826	463151	387629	444106	586398			144147	174581	195976	281295	178829	444106	500505			1
High	Master Protein	B3KQ71	cDNA FLJ32982 fis, clone THYMU1000002, highly similar to Golgi phosphoprotein 3 [OS=Homo sapiens]	0	12.47	15	2	10	2	281	32	6.43	22	7.92	2	2	Pf05719	64083		GOLPH3	1.179	1.203	1.041	0.743568	0.673269	0.827536	31.64	38.47	37.73	161532	212626	272201	250731	254428	864508	327335		194531	70515.6	181209	268299	152282	117378	864508	279388		175018	1
High	Master Protein	B3KQB4	PRA1 family protein [OS=Homo sapiens]	0	55.564	35	9	127	9	188	21.5	9.77	632	93.34	8	9	Pf03208	10550		ARL6IP5	0.923	0.584	0.757	0.527924	0.254634	0.750369	44.9	37.55	61.11	4.63671e+07	4.11313e+07	2.81708e+07	3.72553e+07	4.35157e+07	1.46889e+07	3.41523e+07	2.86975e+06	1.73905e+07	2.02412e+07	3.50539e+07	2.7767e+07	2.2627e+07	2.00756e+07	1.46889e+07	2.91498e+07	1.59806e+06	1.56462e+07	1	Acetyl [N-Term]
High	Master Protein	B3KQC8	cDNA FLJ90233 fis, clone NT2RM2000514, highly similar to F-box only protein 21 [OS=Homo sapiens]	0	16.478	13	2	6	2	371	43.2	6.1	30	8.01	2	2	Pf08755, Pf13369	23014		FBXO21	1.37	1.053	0.783	0.299608	0.851368	0.62089	34.75	34.26	13.65		287024	174736	444589	450755	737891	367230		564354		244615	172232	270021	207952	737891	313439		507746	1
High	Master Protein	B3KQQ7	cDNA PSEC0037 fis, clone NT2RP1000800, highly similar to N-acetyllactosaminidebeta-1,3-N-acetylglucosaminyltransferase [OS=Homo sapiens]	0	19.008	12	3	18	3	415	47.1	7.2	324	12.28	3	3	Pf13896	11041		B3GNT1; B4GAT1	1.599	1.017	0.734	0.109693	0.839059	0.470608	70.21	63.48	37.07	855187	678687	386374	1.08857e+06	867824	1.34081e+06	898152	212162	1.17262e+06	373326	578407	380836	661145	400362	1.34081e+06	766594	118145	1.055e+06	1
High	Master Protein	B3KQQ9	cDNA PSEC0048 fis, clone NT2RP2000028, highly similar to Serine protease 23 [OS=Homo sapiens]	0	53.72	26	6	24	6	383	43	9.36	428	15.98	6	6	Pf00089	11098		PRSS23	1.571	1.704	0.926	0.141204	0.193837	0.907251	25.68	76.93	38.01	474584	682761	182871	1.06022e+06	861536	929173	691611	1.39045e+07	692182	207176	581879	180250	643922	397462	929173	590306	7.74294e+06	622753	1
High	Master Protein	B3KQT8	cDNA PSEC0172 fis, clone PLACE1011835, highly similar to Procollagen C-endopeptidase enhancer 2 [OS=Homo sapiens]	0	50.96	30	10	26	10	415	45.7	8.47	215	17.62	10	10	Pf00431, Pf01759	26577		PCOLCE2	1.231	3.315	2.052	0.674958	0.00863251	0.0295145	18.81	109.7	141.46	325766	151874	448110	270978	498125	130358	483155	1.37514e+07	417782	142211	129434	441687	164579	229805	130358	412384	7.65767e+06	375877	1
High	Master Protein	B3KQT9	Protein disulfide-isomerase [OS=Homo sapiens]	0	637.002	74	41	1300	13	480	54.1	7.21	18814	1883.75	41	41	Pf00085, Pf13098, Pf13848, Pf13899, Pf13905	2923		PDIA3	1.098	0.945	0.736	0.656463	0.630683	0.584326	53.97	91.78	56.09	5.75007e+08	5.45194e+08	5.05952e+08	5.72066e+08	5.11708e+08	7.46502e+08	6.48755e+08	9.76859e+07	7.62541e+08	2.51015e+08	4.64638e+08	4.987e+08	3.47445e+08	2.36072e+08	7.46502e+08	5.53728e+08	5.43978e+07	6.86055e+08	1	Oxidation [K50; P220]
High	Master Protein	B3KR50	cDNA FLJ33691 fis, clone BRAWH2002976, highly similar to GROWTH FACTOR RECEPTOR-BOUND PROTEIN 2 [OS=Homo sapiens]	0	91.832	65	14	129	14	217	25.2	6.32	714	109.7	14	14	Pf00017, Pf00018, Pf07653, Pf14604	2885		GRB2	1.172	0.802	0.802	0.374215	0.959969	0.955165	38.49	76.02	62.58	1.3325e+07	1.50525e+07	1.45389e+07	1.69566e+07	1.71296e+07	1.78994e+07	1.48543e+07	1.87385e+06	1.86071e+07	5.81692e+06	1.28284e+07	1.43305e+07	1.02986e+07	7.90258e+06	1.78994e+07	1.26785e+07	1.04348e+06	1.67407e+07	1
High	Master Protein	B3KR70	cDNA FLJ33764 fis, clone BRCOC2000360, highly similar to Vacuolar ATP synthase subunit S1 [OS=Homo sapiens]	0	16.187	6	2	8	2	430	47.7	6.13	147	9.65	2	2	Pf05827	537		ATP6AP1	0.763	0.456	0.681	0.234177	0.0727912	0.293539	18.37	16.53	41.09	1.55055e+06	1.33147e+06	1.12869e+06	1.23849e+06	1.19996e+06	727243	964306	245971	1.15037e+06	676882	1.13474e+06	1.11251e+06	752196	553588	727243	823058	136972	1.03499e+06	1
High	Master Protein	B3KRG8	lipase [OS=Homo sapiens]	0	15.2	6	1	12	1	399	45.3	6.83	95	13.28	1	1	Pf00561, Pf04083, Pf12695, Pf12697	3988		LIPA	0.651	0.643	0.988	0.114862	0.366114	0.95622	23.57	35.14	63.88	442061	620644	442391	221411	524655		635885		178501	192979	528940	436049	134474	242045		542742		160597	1
High	Master Protein	B3KRJ9	cDNA FLJ34439 fis, clone HLUNG2001146, highly similar to Splicing factor, arginine/serine-rich 12 [OS=Homo sapiens]	0	97.178	23	8	92	8	514	58.2	9.92	1146	154.38	8	8	Pf00076, Pf13893, Pf14259	140890		SREK1	1.183	0.631	0.6	0.29661	0.408109	0.083165	22.51	24.92	19.78	8.29662e+06	8.29144e+06	8.65856e+06	1.03171e+07	9.82222e+06	5.47176e+06	7.85832e+06	1.65671e+06	6.5749e+06	3.62183e+06	7.06633e+06	8.53444e+06	6.26609e+06	4.53139e+06	5.47176e+06	6.70726e+06	922564	5.91541e+06	1
High	Master Protein	B3KRQ2	cDNA FLJ34689 fis, clone MESAN2000815, highly similar to Homo sapiens leucine zipper protein 5 (LUZP5), mRNA [OS=Homo sapiens]	0	6.197	1	1	4	1	1143	130.9	6.87	52	2.21	1	1	Pf12422	54892		NCAPG2	0.603	1.29	1.792	0.103351	0.590254	0.127357	10.39	14.18	11.76	159143	145250	226788	114506	124373	87637.2		205220		69472.7	123788	223537	69545.2	57378.2	87637.2		114280		1
High	Master Protein	B3KRT6	cDNA FLJ34908 fis, clone NT2RI2006294, highly similar to Homo sapiens stimulated by retinoic acid gene 6 homolog (STRA6), mRNA [OS=Homo sapiens]	0	7.048	7	2	4	2	476	53.1	9.79	33	0	2	2	Pf14752	64220		STRA6	0.45	0.571	1.271	0.00480189	0.249554	0.477344	2.37	8.87	11.16	1.05859e+06	718889	727747	148919	152743	137988	188592	221781	175389	462120	612669	717316	90446.1	70466.6	137988	160968	123502	157796	1
Medium	Master Protein	B3KRX9	cDNA FLJ35048 fis, clone OCBBF2017893, highly similar to Galactose-3-O-sulfotransferase 4 [OS=Homo sapiens]	0.029	0.74	5	1	2	1	486	54.1	10.18	0		1		Pf06990	79690		GAL3ST4																												1	Oxidation [P231; P249]
High	Master Protein	B3KS36	cDNA FLJ35376 fis, clone SKMUS2004044, highly similar to Homo sapiens ribosomal protein L3 (RPL3), transcript variant 2, mRNA [OS=Homo sapiens]	0	368.182	62	29	644	1	354	40.1	10.3	7795	915.13	29	29	Pf00297	6122		RPL3	1.452	0.616	0.646	0.0285356	0.380137	0.172386	107.62	28.43	41.71	1.68151e+07	7.52487e+06	8.32814e+06	1.46588e+07	2.44105e+07	2.99459e+06	5.1329e+06	1.57659e+07	3.55695e+06	7.3405e+06	6.41303e+06	8.20876e+06	8903045	11261537	2.99459e+06	4381050	8779444	3.20017e+06	1
Medium	Master Protein	B3KS81	serine/arginine repetitive matrix protein 5 [OS=Homo sapiens]	0.012	1.562	2	1	5	1	715	80.3	12.06	0	0	1	1	Pf10243	100170229	ENSG00000226763.4	SRRM5	0.55	0.758	1.455	0.0592994	0.577301	0.364085	10.93	52.38	88.57	137767	150733	211979	103160	67933.5	116687	64162.1		261703	60141.4	128461	208940	62654.1	31340.5	116687	54763.9		235453	1	Oxidation [K243]
High	Master Protein	B3KSH1	Eukaryotic translation initiation factor 3 subunit F [OS=Homo sapiens]	0	100.521	29	10	146	10	372	39.1	5.45	2347	172.38	10	10	Pf01398, Pf13012	8665		EIF3F	0.915	0.684	0.767	0.596887	0.543584	0.739889	26.38	27.71	26.62	1.50541e+07	2.42184e+07	2.22229e+07	2.01323e+07	1.82882e+07	2.05836e+07	1.66628e+07	6.72115e+06	1.82769e+07	6.57177e+06	2.064e+07	2.19044e+07	1.22273e+07	8.43708e+06	2.05836e+07	1.42221e+07	3.74277e+06	1.64436e+07	1
Medium	Master Protein	B3KSL2	cDNA FLJ36533 fis, clone TRACH2004428, highly similar to Lactotransferrin [OS=Homo sapiens]	0.017	1.183	2	1	1	1	697	76.7	8.02	0		1		Pf00405	4057		LTF	0.994	1.383	1.152	0.944114	0.375411	0.519346	47.8	63.4	83.73	441829	468509	481617	465568	313575	802719	647848	233458	924874	192877	399284	474713	282762	144665	802719	552953	130004	832105	1
High	Master Protein	B3KSL3	cDNA FLJ36535 fis, clone TRACH2004521 [OS=Homo sapiens]	0	20.596	20	3	10	1	171	19.6	6.52	158	15.55	3	3		55313		CPPED1	0.938	1.065	1.419	0.753765	0.819242	0.276703	34.2	104.12	77.68	216636	396996	368774	255399	203288	389210	552182	64705.7	392636	94571	338338	363488	155117	93784.8	389210	471300	36032.3	353252	1
High	Master Protein	B3KSS4	cDNA FLJ36858 fis, clone ASTRO2015185, highly similar to POLIOVIRUS RECEPTOR [OS=Homo sapiens]	0	4.762	4	1	4	1	362	39.6	6.67	0	2.13	1	1	Pf00047, Pf08205	5817		PVR	0.875	0.525	0.837	0.571468	0.174888	0.739834	94.44	23.73	74.8	909510	1.098e+06	550200	960920	881970	65062.8	770688		215710	397040	935764	542313	583615	406889	65062.8	657800		194073	1
High	Master Protein	B3KSX6	cDNA FLJ37250 fis, clone BRAMY2006809, highly similar to DNA polymerase subunit alpha B [OS=Homo sapiens]	0	6.921	4	1	4	1	295	33	5.17	27	2.13	1	1	Pf04042	23649		POLA2	0.889	1.051	1.132	0.617189	0.833562	0.594215	30.16	44.35	53.01	352521	381686	514039	339259	253951	587000	540471	287476	521370	153891	325290	506671	206049	117158	587000	461305	160085	469074	1
High	Master Protein	B3KSZ1	peptidyl-prolyl cis-trans isomerase [OS=Homo sapiens]	0	42.645	35	6	75	5	217	24.1	7.01	791	71.63	6	6	Pf00160	10450		PPIE	1.194	0.926	0.794	0.386655	0.83367	0.608069	46.65	68.43	45.34	2.90768e+06	3.27942e+06	3.38857e+06	4.03496e+06	2.57874e+06	5.2048e+06	2.82858e+06	900214	5.20456e+06	1.26933e+06	2.79487e+06	3.33999e+06	2.45063e+06	1.18968e+06	5.2048e+06	2.41426e+06	501297	4.68252e+06	1
High	Master Protein	B3KT23	cDNA FLJ37500 fis, clone BRAWH2016166, highly similar to Tetratricopeptide repeat protein 19 [OS=Homo sapiens]	0.001	3.194	6	1	2	1	143	16.5	8.43	0	0	1	1	Pf13414, Pf13424	54902		TTC19	1.047	1.458	1.289	0.939317	0.379713	0.363942	38.1	25.77	22.09	298390	395236	230096	413832	310679	302836	478861		395439	130260	336838	226798	251341	143329	302836	408719		355775	1
High	Master Protein	B3KT25	cDNA FLJ37504 fis, clone BRAWH2017103, highly similar to ATPase WRNIP1 [OS=Homo sapiens]	0	25.209	13	7	23	7	614	66.6	6.34	105	11.41	7	7	Pf00004, Pf00006, Pf00308, Pf00910, Pf03215, Pf04851, Pf05496, Pf07724, Pf07728, Pf12002, Pf13173, Pf13177, Pf13191, Pf13401	56897		WRNIP1	1.671	1.337	0.891	0.00988048	0.238724	0.996039	35.35	46.15	34.17	1.05073e+06	1.81202e+06	1.69921e+06	2.36868e+06	2.05884e+06	3.43749e+06	2.56293e+06	1.46601e+06	3.08952e+06	458689	1.54428e+06	1.67485e+06	1.43862e+06	949827	3.43749e+06	2.18752e+06	816368	2.77963e+06	1
High	Master Protein	B3KT39	Glycylpeptide N-tetradecanoyltransferase [OS=Homo sapiens]	0	34.645	11	5	50	2	485	56.7	9.51	249	31.71	5	5	Pf01233, Pf02799	9397		NMT2	0.848	0.746	0.879	0.39808	0.642651	0.989574	15.79	3.54	41.68	1.92793e+06	2.15208e+06	2.17276e+06	1.84795e+06	1.30398e+06	2.13323e+06	1.56306e+06	659027	2.11475e+06	841626	1.8341e+06	2.14161e+06	1.12235e+06	601579	2.13323e+06	1.33411e+06	366989	1.90263e+06	1
High	Master Protein	B3KT91	POU domain protein [OS=Homo sapiens]	0.003	2.511	7	2	8	1	301	32.7	9.14	0	3.37	2	1	Pf00046, Pf00157	5463		POU6F1	1.433	0.904	1.181	0.206164	0.956595	0.269852	129.69	97.71	133.01	669185	814968	924678	1.16755e+06	2.32139e+06	120080	736336	5.16807e+06	141872	292128	694552	911424	709109	1.07095e+06	120080	628480	2.87791e+06	127642	1	Oxidation [P257; P259]
High	Master Protein	B3KTA5	cDNA FLJ37943 fis, clone CTONG2008621, highly similar to Syntaxin-17 [OS=Homo sapiens]	0	5.879	5	1	8	1	302	33.4	6.57	26	7.79	1	1	Pf05739	55014		STX17	1.103	0.999	0.859	0.789111	0.849021	0.807963	34.14	48.06	31.49	818495	695019	534988	748150	590157	952061	817937	361099	793748	357308	592326	527319	454389	272263	952061	698129	201083	714131	1
High	Master Protein	B3KTC3	cDNA FLJ38059 fis, clone CTONG2014946, highly similar to Gigaxonin [OS=Homo sapiens]	0.003	2.459	2	1	1	1	597	67.6	5.94	0		1		Pf00651, Pf01344, Pf07707, Pf13415, Pf13418, Pf13964	8139		GAN																												1
High	Master Protein	B3KTC8	cDNA FLJ38074 fis, clone CTONG2015804, highly similar to Homo sapiens UDP-N-acteylglucosamine pyrophosphorylase 1-like 1 (UAP1L1), mRNA [OS=Homo sapiens]	0	4.403	3	1	1	1	381	43	5.53		0		1	Pf01704	91373		UAP1L1	1.579	2.172	0.962	0.131075	0.072853	0.942476	34.62	45.16	63.73	248052	243853	323617	336462	391721	730956	551800	277651	702910	108285	207822	318978	204350	180717	730956	470974	154614	632404	1
High	Master Protein	B3KTC9	cDNA FLJ38075 fis, clone CTONG2015815, highly similar to F-box/LRR-repeat protein 18 [OS=Homo sapiens]	0	5.056	1	1	6	1	663	72.4	8.63	63	6.84	1	1		80028		FBXL18	0.656	0.88	1.115	0.141943	0.827319	0.699692	15.23	44.32	60.7	244889	190996	279484	125207	155130	327421	215584	132430	365054	106905	162776	275478	76044.3	71567.7	327421	184006	73745.5	328437	1
High	Master Protein	B3KTI5	cDNA FLJ38324 fis, clone FCBBF3024663, weakly similar to Zyg-11 protein homolog [OS=Homo sapiens]	0.001	3.402	2	1	2	1	683	77.1	7.28	0	0	1	1	Pf12799	79699		ZYG11B	0.95	0.727	0.765	0.800238	0.565114	0.525463	11.46	50.83	56.29	434151	298388	430427	409000	268936	444027	706200	110213	313080	189525	254299	424257	248406	124071	444027	602758	61373.6	281677	1
High	Master Protein	B3KTL0	cDNA FLJ38437 fis, clone FEBRA2016572, highly similar to Membralin [OS=Homo sapiens]	0.006	2.04	3	1	2	1	420	47.9	5.68	0	0	1	1	Pf09746	91304		C19orf6; TMEM259	1.34	0.783	0.608	0.499674	0.627253	0.224431	34.92	44.22	27.87	130512	167007	175714	156947		262367	130755	33635.5	194378	56974.2	142330	173196	95321.9		262367	111602	18730.4	174881	1
High	Master Protein	B3KTN5	cDNA FLJ38538 fis, clone HCHON2001407, highly similar to LanC-like protein 2 [OS=Homo sapiens]	0	31.567	13	4	25	4	450	50.8	7.59	226	18.62	4	4	Pf05147	55915		LANCL2	0.797	0.664	0.879	0.274391	0.42066	0.986605	15.03	27.41	43.33	1.4331e+06	1.62643e+06	1.72396e+06	1.2094e+06	1.50872e+06	1.1354e+06	1.94821e+06	703830	959116	625612	1.38611e+06	1.69925e+06	734528	696033	1.1354e+06	1.66285e+06	391938	862912	1
High	Master Protein	B3KTT0	cDNA FLJ38675 fis, clone IMR322000243, highly similar to Nucleoporin Nup43 [OS=Homo sapiens]	0	42.317	21	4	23	4	380	42.1	5.54	501	36.2	4	4	Pf00400	348995		NUP43	0.788	0.685	0.819	0.167936	0.521671	0.72604	12.47	17.47	21.02	4.63259e+06	4.0926e+06	3.77563e+06	3.5607e+06	3.21245e+06	2.95402e+06	3.10781e+06	1.56432e+06	2.69517e+06	2.02233e+06	3.4879e+06	3.72151e+06	2.16259e+06	1.48204e+06	2.95402e+06	2.65259e+06	871116	2.42483e+06	1
High	Master Protein	B3KTW8	cDNA FLJ38884 fis, clone MESAN2017152, highly similar to Homo sapiens PH domain-containing protein (pp9099), mRNA [OS=Homo sapiens]	0	5.362	6	1	2	1	223	25	8.63		4.5		1	Pf00169, Pf15413	80301		PLEKHO2	0.33	0.542	1.643	0.000449496	0.230725	0.187884	2.27	27.17	106.31	440367		332864	126378			404283	106590		192239		328093	76755.7			345065	59356		1	Acetyl [N-Term]
Medium	Master Protein	B3KTX3	cDNA FLJ38913 fis, clone NT2NE2008017, highly similar to Homo sapiens SEC14 and spectrin domains 1 (SESTD1), mRNA [OS=Homo sapiens]	0.027	0.802	1	1	2	1	696	79.2	5.07	0	0	1	1	Pf13716	91404		SESTD1	0.64	0.455	0.781	0.127705	0.116399	0.528454	6.25	0.52	16.77			230966		163866	133469	105123	175031	103342			227655		75598	133469	89725.2	97468.3	92976	1
High	Master Protein	B3KU03	cDNA FLJ39022 fis, clone NT2RP7003724, weakly similar to Serine/arginine repetitive matrix protein 1 [OS=Homo sapiens]	0	23.273	10	4	20	4	593	64.6	10.61	119	15.26	4	4		55700		MAP7D1	0.849	0.787	0.982	0.469563	0.729301	0.582308	41.7	35.11	75.31	651687	1.1898e+06	1.47431e+06	892741	948383	985166	758213	2.09876e+06	1.4963e+06	284489	1.014e+06	1.45318e+06	542206	437527	985166	647152	1.16873e+06	1.34622e+06	1
High	Master Protein	B3KU05	cDNA FLJ39026 fis, clone NT2RP7005675 [OS=Homo sapiens]	0	11.09	1	1	16	1	1133	128.8	7.27	389	14.39	1	1	Pf07919, Pf11817, Pf12742	60684		TRAPPC11	1.198	1.124	0.938	0.544663	0.705231	0.997155	35.83	45.05	56.66	283390	441261	531215	421509	460605	636353	596930	221684	567126	123712	376062	523600	256003	212496	636353	509494	123448	510240	1
Medium	Master Protein	B3KU09	cDNA FLJ39034 fis, clone NT2RP7008085, highly similar to Homo sapiens ring finger protein 123 (RNF123), mRNA [OS=Homo sapiens]	0.027	0.802	1	1	8	1	1314	148.4	6.74	0	1.61	1	1	Pf00097, Pf00622, Pf13639, Pf13920, Pf13923, Pf14634	63891		RNF123																												1
High	Master Protein	B3KU11	Oxysterol-binding protein [OS=Homo sapiens]	0	34.735	8	6	27	6	950	108.4	6.4	99	32.96	5	6	Pf00023, Pf00169, Pf01237, Pf12796, Pf13606, Pf13637, Pf13857	114876		OSBPL1A	0.925	0.572	0.636	0.663125	0.225574	0.170343	24.7	24.72	24.47	2.25364e+06	2.60659e+06	1.98222e+06	2.00728e+06	2.38229e+06	2.12323e+06	1.36855e+06	575792	2.69729e+06	983812	2.22145e+06	1.95381e+06	1.21912e+06	1.09905e+06	2.12323e+06	1.16809e+06	320638	2.42674e+06	1	Acetyl [N-Term]
Medium	Master Protein	B3KUB1	Kinase [OS=Homo sapiens]	0.027	0.796	5	1	3	1	246	28.2	7.39	0	0	1	1	Pf03770	253430		IPMK	1.612	2.444	1.284	0.0624715	0.00450124	0.107804	77.48	123.66	131.43	551617	1.15542e+06	1.90994e+06	889128	1.53615e+06	3637320	4.66857e+06	223770	2.89751e+06	240805	984698	1.88256e+06	540012	708690	3637320	3.98473e+06	124609	2606878	1
High	Master Protein	B3KUB4	Carbonic anhydrase 12 [OS=Homo sapiens]	0.005	2.236	3	1	8	1	283	31.8	7.97	15	0	1	1	Pf00194	771	ENSG00000074410.13	CA12	1.082	0.763	0.706	0.886489	0.620295	0.427273	31.83	18.93	7.92	661140	516239	156001	501709	621589		394003			288616	439962	153765	304713	286764		336291			1
High	Master Protein	B3KUD7	cDNA FLJ39640 fis, clone SMINT2003386, highly similar to DNA REPLICATION LICENSING FACTOR MCM7 [OS=Homo sapiens]	0	280.836	57	28	274	2	612	68.5	7.62	2920	354.18	28	28	Pf00493, Pf07728, Pf14551	4176		MCM7	0.879	0.686	0.762	0.578004	0.459189	0.599929	33.73	22.93	31.12	708535	647803	982551	589811	757888	837244	366377	609003	925175	309306	552087	968467	358222	349645	837244	312712	339132	832375	1
High	Master Protein	B3KUJ0	cDNA FLJ39996 fis, clone STOMA2002166, highly similar to Splicing factor 3B subunit 4 [OS=Homo sapiens]	0	13.563	3	1	28	1	424	44.5	8.24	598	37.32	1	1	Pf00076, Pf13893, Pf14259	10262		SF3B4	1.071	0.826	0.738	0.781381	0.826983	0.409873	24.7	18.9	12.99	2.02536e+06	2.15283e+06	2.79104e+06	2.69062e+06	2.9901e+06	2.12939e+06	1.98583e+06	1.44574e+06	2.30517e+06	884158	1.83474e+06	2.75103e+06	1.63415e+06	1.37946e+06	2.12939e+06	1.69495e+06	805081	2073950	1
High	Master Protein	B3KUM5	cDNA FLJ40245 fis, clone TESTI2023968, highly similar to GC-RICH SEQUENCE DNA-BINDING FACTOR [OS=Homo sapiens]	0.006	2.125	1	1	2	1	612	71.3	5.85	29	1.62	1	1	Pf07842	6936		GCFC2	0.748	0.738	1.065	0.292881	0.570248	0.802743	27.59	25.05	19.27	169934	244415	351077	156833	169349	262486	180429	178803	243302	74183.4	208301	346044	95252.7	78127.7	262486	154000	99569.1	218898	1
High	Master Protein	B3KUS5	ubiquitin carboxyl-terminal hydrolase 30 [OS=Homo sapiens]	0	26.134	10	2	30	2	486	55.1	7.85	417	48.51	2	2	Pf00443	84749	ENSG00000135093.12	USP30	0.894	0.821	0.97	0.556802	0.793986	0.80209	14.78	12.75	23.43	1.27041e+06	1.11261e+06	1.03139e+06	1.15957e+06	979243	476398	830776	440265	1.09842e+06	554590	948219	1.01661e+06	704263	451765	476398	709086	245168	988241	1
High	Master Protein	B3KUY5	cDNA FLJ40905 fis, clone UTERU2004664, highly similar to Conserved oligomeric Golgi complex component 1 [OS=Homo sapiens]	0	21.179	8	6	24	6	894	99.2	7.06	66	9.06	6	6		9382		COG1	1.468	1.235	0.692	0.0931733	0.398681	0.314531	34.39	65.06	36.69	769574	1.17005e+06	1.10746e+06	1.5139e+06	1.27486e+06	1.99947e+06	1.35256e+06	448282	1.50829e+06	335952	997169	1.09158e+06	919465	588147	1.99947e+06	1.15444e+06	249632	1.357e+06	1
High	Master Protein	B3KV14	cDNA FLJ16042 fis, clone BRAMY2021498, highly similar to ADAMTS-19 [OS=Homo sapiens]	0.001	4.009	3	1	2	1	599	67.1	8.31	36	1.89	1	1	Pf00090, Pf05986, Pf08686	171019		ADAMTS19		100	100		1e-17	1e-17											191327									106543		1
High	Master Protein	B3KVH4	cDNA FLJ16549 fis, clone PLACE7003657, highly similar to RAC-alpha serine/threonine-protein kinase [OS=Homo sapiens]	0	34.194	14	5	30	4	480	55.6	6.07	180	14.56	5	5	Pf00069, Pf00169, Pf00433, Pf07714, Pf14531, Pf15413	207		AKT1	0.849	1.177	1.514	0.390939	0.415095	0.0185577	37.64	48.93	51.53	1.47286e+06	2.02083e+06	2.86704e+06	1.37928e+06	1.19974e+06	2.68924e+06	2.58978e+06	1.88986e+06	2.19214e+06	642966	1.72224e+06	2.82594e+06	837704	553488	2.68924e+06	2.21044e+06	1.0524e+06	1.97226e+06	1
High	Master Protein	B3KVL5	zinc finger CCHC domain-containing protein 10 [OS=Homo sapiens]	0	7.827	8	1	2	1	186	20.3	7.88	52	2.9	1	1	Pf13917	54819	ENSG00000155329.11	ZCCHC10		100	100		1e-17	1e-17											538313									299767		1
High	Master Protein	B3KVY9	cDNA FLJ41755 fis, clone HSYRA2009102, highly similar to Adenosine 3'-phospho 5'-phosphosulfate transporter 1 [OS=Homo sapiens]	0	6.503	5	2	12	2	412	45	8.98	73	8.19	2	2	Pf08449	347734		SLC35B2	0.901	0.687	0.806	0.540469	0.480393	0.660101	19.36	39.56	48.66	2.64741e+06	2.54056e+06	2.12537e+06	2.08322e+06	2.55782e+06	1.84591e+06	2.39368e+06	552033	2.05692e+06	1.15571e+06	2.16518e+06	2.0949e+06	1.26524e+06	1180025	1.84591e+06	2.04306e+06	307407	1.8506e+06	1
High	Master Protein	B3KW34	Protein YIPF [OS=Homo sapiens]	0.001	3.235	4	1	14	1	257	28	4.36	22	6.83	1	1	Pf01694, Pf04893	81555		YIPF5	0.816	0.444	0.544	0.270415	0.0510569	0.0408396	42.6	15.41	23.16	2.93732e+06	2.79291e+06	2.16039e+06	2.27796e+06	3.45313e+06	1294121	2.36183e+06	585619	1.23953e+06	1.28227e+06	2.38024e+06	2.12942e+06	1.38352e+06	1.59307e+06	1294121	2.01588e+06	326110	1115197	1
High	Master Protein	B3KW79	carboxypeptidase [OS=Homo sapiens]	0	75.965	25	10	205	1	476	54.1	5.6	1672	200.76	10	10	Pf00450	54504		CPVL	0.77	0.46	0.686	0.145346	0.0522371	0.329216	24.77	19.17	36.13	2.92786e+07	2.89441e+07	2.2695e+07	2.04206e+07	2.4939e+07	1.29749e+07	1.54867e+07	2.49792e+06	1.28298e+07	1.27814e+07	2.46675e+07	2.23697e+07	1.24024e+07	1.15054e+07	1.29749e+07	1.32183e+07	1.391e+06	1.15429e+07	1
Medium	Master Protein	B3KWP3	cDNA FLJ43503 fis, clone PEBLM2006215, highly similar to Mitochondrial folate transporter/carrier [OS=Homo sapiens]	0.01	1.659	3	1	2	1	299	33.5	9.51	0	0	1	1	Pf00153	81034		SLC25A32	1.021	0.331	0.324	0.864119	0.0334494	0.0112982	25.15	6.75	6.1	168401	152983	106423	112777	165789		70101.1	28024.7		73514.2	130379	104897	68494.8	76485.4		59832.9	15605.9		1
High	Master Protein	B3KWP7	cDNA FLJ43538 fis, clone PLACE7008431, highly similar to Homo sapiens phosphatidylinositol-4-phosphate 5-kinase, type II, gamma (PIP5K2C), mRNA [OS=Homo sapiens]	0	22.749	15	4	32	4	352	40.2	6.21	92	19.45	4	4	Pf01504	79837		PIP4K2C	1.148	1.078	0.916	0.620874	0.638943	0.860306	21.69	29.43	25.78	1.02221e+06	1.19656e+06	1.27879e+06	1.26042e+06	1.54332e+06	1.1914e+06	1.69665e+06	1.21138e+06	910598	446239	1.01976e+06	1.26046e+06	765518	711998	1.1914e+06	1.44813e+06	674575	819261	1
High	Master Protein	B3KX11	T-complex protein 1 subunit gamma [OS=Homo sapiens]	0	400.364	64	31	676	31	522	57.9	6.93	9561	1011.06	29	31	Pf00118	7203		CCT3	1.03	0.738	0.76	0.965254	0.725272	0.71694	31.3	44.84	44.22	1.69059e+08	1.87648e+08	2.03695e+08	1.94715e+08	1.83655e+08	2.12116e+08	1.68063e+08	4.82705e+07	2.20308e+08	7.38013e+07	1.59922e+08	2.00775e+08	1.1826e+08	8.47275e+07	2.12116e+08	1.43446e+08	2.68801e+07	1.9821e+08	1	Acetyl [N-Term]
High	Master Protein	B3KX16	cDNA FLJ44469 fis, clone UTERU2026090, highly similar to Cartilage-associated protein [OS=Homo sapiens]	0	33.887	17	6	89	6	372	43.5	5.86	700	40.13	6	6		10491		CRTAP	0.854	0.665	0.835	0.385172	0.537723	0.972226	16.73	15.25	22.44	8.86983e+06	7.80786e+06	7.06761e+06	7.36642e+06	8.8255e+06	5.33216e+06	5.31681e+06	6.57829e+06	5.22763e+06	3.87206e+06	6.6542e+06	6.9663e+06	4.474e+06	4.07156e+06	5.33216e+06	4.53802e+06	3.66322e+06	4.70328e+06	1
High	Master Protein	B3KX23	cDNA FLJ44516 fis, clone UTERU3002600, highly similar to Homo sapiens DEAD (Asp-Glu-Ala-Asp) box polypeptide 42 (DDX42), transcript variant 2, mRNA [OS=Homo sapiens]	0	99.475	35	15	104	1	674	73.2	9.41	1077	79.06	15	15	Pf00270, Pf00271, Pf13307	11325		DDX42																												1
High	Master Protein	B3KX82	cDNA FLJ44964 fis, clone BRAWH2016209, highly similar to Homo sapiens synovial apoptosis inhibitor 1, synoviolin (SYVN1), transcript variant 2, mRNA [OS=Homo sapiens]	0	12.985	4	2	10	2	629	69.7	8.91	57	11.84	2	2	Pf00097, Pf12678, Pf12861, Pf12906, Pf13445, Pf13639, Pf13920, Pf13923, Pf14634	84447		SYVN1	0.987	1.139	0.98	0.866427	0.477935	0.645313	45.61	39.36	103.56	3.45895e+06	3.39146e+06	2.45761e+06	2.79032e+06	3.27457e+06	2097528	3.50355e+06	414139	1.94129e+06	1.50998e+06	2.89035e+06	2.42238e+06	1.6947e+06	1.51069e+06	2097528	2.99036e+06	230619	1.74657e+06	1
High	Master Protein	B3KXC7	cDNA FLJ45182 fis, clone BRAWH3047692, highly similar to Homo sapiens peroxisomal LON protease like (LONPL), mRNA [OS=Homo sapiens]	0	7.423	2	1	6	1	581	64	7.78	121	6.6	1	1	Pf00004, Pf01202, Pf05362, Pf07726, Pf07728, Pf13191, Pf13541	83752		LONP2	100	100	0.772	1e-17	1e-17	0.526572			6.5				381143	386858	349112	306061		262720				231487	178473	349112	261230		236368	1
High	Master Protein	B3KXH8	cDNA FLJ45417 fis, clone BRHIP3033811, highly similar to Sorting nexin-9 [OS=Homo sapiens]	0	70.775	26	8	65	8	395	45.6	8.15	440	73.87	8	8	Pf00787, Pf10456	51429		SNX9	1.301	0.828	0.684	0.155199	0.992516	0.279251	36.72	60.15	42.13	3.48238e+06	4.43565e+06	3.64306e+06	4.61913e+06	5.06328e+06	4.31003e+06	6.26524e+06	1.0706e+06	4.11223e+06	1.52021e+06	3.78025e+06	3.59084e+06	2.80543e+06	2.3359e+06	4.31003e+06	5.34753e+06	596176	3.69975e+06	1
High	Master Protein	B3KXN8	Phosphoinositide phospholipase C [OS=Homo sapiens]	0.002	2.841	1	1	2	1	961	109	5.9	24	0	1	1	Pf00168, Pf00387, Pf00388, Pf06631, Pf08703, Pf09279	23236		PLCB1	1.513	1.279	0.845	0.375879	0.660945	0.726273	83.96	0	38.28		75883.1		114846	49811.7	179920	97030.9				64670.9		69751.9	22980.2	179920	82818.2			1
High	Master Protein	B3KXN9	cDNA FLJ45793 fis, clone NT2RI2009233 [OS=Homo sapiens]	0	7.971	10	2	13	2	270	29.8	6.04	107	0	2	2	Pf07847	84890		ADO	0.822	0.993	1.062	0.428612	0.992517	0.87625	24.27	77.71	66.5	170199	226946	217733	140244	156798	319674	333231	24167	91269.6	74299.2	193413	214612	85176.9	72337.3	319674	284421	13457.7	82114.8	1
High	Master Protein	B3KXS5	Lon protease homolog, mitochondrial [OS=Homo sapiens]	0	243.188	37	32	335	32	923	103	6.67	3169	393.02	32	32	Pf00004, Pf00910, Pf01695, Pf02190, Pf05362, Pf05496, Pf07724, Pf07728, Pf08298, Pf13173, Pf13191, Pf13207, Pf13401, Pf13541	9361		LONP1	1.033	0.77	0.8	0.95049	0.837163	0.959769	42.82	39.06	41.77	5.9218e+07	5.17943e+07	3.816e+07	5.23677e+07	5.51674e+07	3.82639e+07	5.21484e+07	2.42466e+07	4.02902e+07	2.58512e+07	4.41414e+07	3.7613e+07	3.18055e+07	2.5451e+07	3.82639e+07	4.45099e+07	1.3502e+07	3.62489e+07	1
High	Master Protein	B3KXW2	cDNA FLJ46178 fis, clone TESTI4003944, highly similar to Homo sapiens zinc finger protein 532 (ZNF532), mRNA [OS=Homo sapiens]	0	36.964	9	7	14	7	1301	141.6	8.65	89	7.76	7	7	Pf02591, Pf12756	55205		ZNF532	0.748	1.385	1.533	0.222509	0.340153	0.156328	16.97	88.72	79.82	1.24709e+06	932045	1.25701e+06	686060	583588	499577	310290	2.52613e+06	347590	544406	794330	1.23899e+06	416678	269233	499577	264840	1.40671e+06	312725	1
High	Master Protein	B3KXW5	cDNA FLJ46199 fis, clone TESTI4007965, highly similar to AP-1 complex subunit gamma-1 [OS=Homo sapiens]	0	56.517	13	10	107	10	845	94.1	7.05	1166	77.54	10	10	Pf01602, Pf02883	164		AP1G1	1.096	0.603	0.662	0.57734	0.333497	0.207922	35.09	33.01	33.95	7.91569e+06	1.00555e+07	1.09625e+07	9.60761e+06	1.30357e+07	7.41166e+06	1.03067e+07	1.86674e+06	6.96705e+06	3.45554e+06	8.56974e+06	1.08053e+07	5.83518e+06	6.01392e+06	7.41166e+06	8.79705e+06	1.03952e+06	6.26822e+06	1
High	Master Protein	B3KXZ1	alpha-1,2-mannosidase [OS=Homo sapiens]	0	24.113	11	3	10	3	372	41.7	6.83	56	5.52	3	3	Pf01532	11253		MAN1B1	1.2	0.741	0.743	0.583634	0.573182	0.501175	82.2	56.21	58.78	1.06037e+06	826911	707374	978856	895132	873081	1.01916e+06	100463	826836	462895	704730	697234	594508	412961	873081	869881	55944	743900	1
High	Master Protein	B3KY04	cDNA FLJ46506 fis, clone THYMU3030752, highly similar to BTB/POZ domain-containing protein KCTD12 [OS=Homo sapiens]	0	102.995	42	10	85	10	325	35.7	5.64	1289	112.12	10	10	Pf02214	115207		KCTD12	3.217	5.196	2.318	1.65618e-10	1.10693e-09	4.76194e-09	103.82	118.24	113.05	557827	1.56602e+06	5.89046e+06	4.82035e+06	3.41632e+06	4.28761e+07	2.73855e+07	14693.3	2.05981e+07	243515	1.33463e+06	5.80603e+06	2.92764e+06	1.57609e+06	4.28761e+07	2.33742e+07	8182.17	1.8532e+07	1
High	Master Protein	B3KY12	cDNA FLJ46581 fis, clone THYMU3043200, highly similar to Splicing factor 3A subunit 3 [OS=Homo sapiens]	0	167.057	38	16	209	16	501	58.7	5.43	2517	231.46	14	16	Pf11931, Pf12108, Pf13297	10946		SF3A3	1.058	0.729	0.726	0.852089	0.696032	0.550982	40.69	22.44	27.74	3.49142e+07	3.67771e+07	3.69151e+07	4.08938e+07	4.16163e+07	3.63081e+07	2.94257e+07	1.83478e+07	3.84118e+07	1.52416e+07	3.13431e+07	3.63859e+07	2.48368e+07	1.91993e+07	3.63081e+07	2.51155e+07	1.02172e+07	3.45589e+07	1	Acetyl [N-Term]
High	Master Protein	B3KY42	cDNA FLJ46788 fis, clone TRACH3028855, highly similar to Pseudouridylate synthase 7 homolog [OS=Homo sapiens]	0	57.429	12	6	36	6	661	75	6.19	206	28.83	6	6	Pf01142	54517		PUS7	1.014	0.764	0.843	0.975325	0.684015	0.813096	32.59	36.24	51.32	2.54149e+06	2.79351e+06	3.70573e+06	2.58967e+06	2.47711e+06	3.7338e+06	1.54462e+06	1.75955e+06	3.77539e+06	1.10947e+06	2.38076e+06	3.65261e+06	1.57283e+06	1.14279e+06	3.7338e+06	1.31837e+06	979830	3.3967e+06	1
High	Master Protein	B3KY43	cDNA FLJ46798 fis, clone TRACH3031660, highly similar to cAMP-dependent protein kinase type II-beta regulatory subunit [OS=Homo sapiens]	0	63.642	31	9	51	6	405	44.8	5.16	564	54.22	9	9	Pf00027, Pf02197	5577		PRKAR2B	1.695	1.082	0.719	0.0368824	0.684102	0.436855	27.89	60.64	30.44	724478	880440	738418	1.63501e+06	1.46109e+06	1.53438e+06	853297	215405	1.40014e+06	316266	750349	727833	993022	674058	1.53438e+06	728309	119951	1.2597e+06	1
High	Master Protein	B3KY60	cDNA FLJ16777 fis, clone BRHIP2029567, highly similar to Cell division cycle 5-like protein [OS=Homo sapiens]	0	148.192	29	17	150	17	802	92.2	8.18	1848	172.39	17	17	Pf00249, Pf11831, Pf13921	988		CDC5L	1.088	0.568	0.635	0.709764	0.232614	0.165684	41.81	14.11	25.49	2.02157e+07	1.91296e+07	1.78716e+07	2.18705e+07	2.00042e+07	1.78101e+07	1.36644e+07	7.28378e+06	1.68978e+07	8.82501e+06	1.63031e+07	1.76154e+07	1.3283e+07	9.22876e+06	1.78101e+07	1.16629e+07	4.05608e+06	1.52029e+07	1
High	Master Protein	B3KY94	CDP-diacylglycerol--inositol 3-phosphatidyltransferase [OS=Homo sapiens]	0.001	3.224	4	1	10	1	237	25.9	8.22	163	9.88	1	1		10423	ENSG00000103502.13	CDIPT	1.25	0.496	0.36	0.262622	0.102992	1.19582e-05	87.27	24.66	13.83	5.8612e+06	3.45288e+06	2.06074e+06	4.76353e+06	7.32654e+06	1.77553e+06	4.53578e+06	541965	1.71322e+06	2558667	2.9427e+06	2.0312e+06	2.89313e+06	3380033	1.77553e+06	3.87139e+06	301801	1.54138e+06	1
High	Master Protein	B3LEU8	TMEM214 protein [OS=Homo sapiens]	0	37.379	13	9	70	9	673	75.4	8.98	476	52.18	9	8	Pf10151	54867		TMEM214	0.897	0.593	0.773	0.530611	0.290908	0.570173	21.21	18.61	39.38	5.81473e+06	4.50828e+06	4.02297e+06	4.59325e+06	5.04695e+06	3.09671e+06	4.01199e+06	1.91859e+06	2.80808e+06	2.53838e+06	3.84216e+06	3.96531e+06	2.78971e+06	2.32836e+06	3.09671e+06	3.42433e+06	1.0684e+06	2.52642e+06	1
High	Master Protein	B4DDF4	Calponin [OS=Homo sapiens]	0	57.012	31	9	76	9	298	32.6	6.98	927	104.37	9	9	Pf00307, Pf00402	1265	ENSG00000064666.14	CNN2	0.913	0.985	0.989	0.549142	0.655939	0.576125	41.41	79.22	73.98	2.91154e+06	3.74483e+06	4.43234e+06	3.68698e+06	2.4198e+06	3.47982e+06	3.56653e+06	1.44368e+06	3.19642e+06	1.27101e+06	3.19151e+06	4.3688e+06	2.23929e+06	1.11635e+06	3.47982e+06	3.04411e+06	803933	2.8758e+06	1
High	Master Protein	B4DDI9	NADPH:adrenodoxin oxidoreductase, mitochondrial [OS=Homo sapiens]	0	110.359	37	13	105	13	489	53.1	8.65	759	106.58	13	12	Pf13450	2232		FDXR	1.783	1.65	0.678	0.00123156	0.0173632	0.280105	52.3	64.82	23.54	6.2104e+06	4.11927e+06	4.55942e+06	7.86171e+06	7.64334e+06	1.57496e+07	1.33397e+07	4.73223e+06	8.70772e+06	2.71111e+06	3.51062e+06	4.49407e+06	4.77481e+06	3.52618e+06	1.57496e+07	1.13858e+07	2.63521e+06	7.83429e+06	1	Oxidation [K219]
High	Master Protein	B4DDK9	cDNA FLJ55952, highly similar to Alpha-1,6-mannosyl-glycoprotein2-beta-N- acetylglucosaminyltransferase [OS=Homo sapiens]	0	10.01	4	1	6	1	453	52.3	8.68	78	8.18	1	1	Pf05060	4247		MGAT2	1.261	0.972	0.76	0.46417	0.971059	0.55554	22.95	12.71	10.45	508380	457345	404823	576528	740573	487273	402600		483230	221930	389770	399020	350154	341656	487273	343629		434759	1
High	Master Protein	B4DDM0	Ribosomal protein S6 kinase [OS=Homo sapiens]	0	12.508	4	1	4	1	481	54.1	8.43	54	6.34	1	1	Pf00069, Pf00433, Pf07714, Pf14531	6198		RPS6KB1	1.779	1.434	0.864	0.0431428	0.327051	0.942919	20.87	43.57	22.96	418768	477730	618121			849722	734174	323056	886495	182810	407143	609261			849722	626634	179898	797575	1
High	Master Protein	B4DDQ2	biglycan [OS=Homo sapiens]	0	49.381	21	7	26	7	334	37.6	7.97	244	23.39	7	7	Pf01462, Pf12799, Pf13855, Pf14580	633		BGN	1.528	1.923	1.233	0.129757	0.0258499	0.152826	50.14	79.22	63.78	287150	1.84618e+06	709114	875735	1.64538e+06	2.4494e+06	1.76144e+06	1.14267e+07	2.64843e+06	125353	1.5734e+06	698949	531877	759079	2.4494e+06	1.50343e+06	6.36311e+06	2.38278e+06	1
High	Master Protein	B4DDR3	cDNA FLJ52148, highly similar to Apoptosis inhibitor 5 [OS=Homo sapiens]	0	107.882	38	14	211	1	331	37.5	8.68	2069	225.04	14	13	Pf05918, Pf13646	8539		API5	1.07	1.195	1.13	0.768844	0.386828	0.290719	15.55	66.88	68.14	1.47045e+06	1.8333e+06	2.02555e+06	2.02822e+06	1.53682e+06	2.16777e+06	1.262e+06		3.36795e+06	641914	1.56242e+06	1.99651e+06	1231839	708997	2.16777e+06	1.07714e+06		3.03013e+06	1
High	Master Protein	B4DDR7	cDNA FLJ54845, highly similar to Transmembrane emp24 domain-containing protein 5 [OS=Homo sapiens]	0	9.569	15	3	28	1	178	20.5	4.92	192	25.3	3	3	Pf01105	50999		TMED5	1.949	1.32	0.757	0.00538226	0.306903	0.534491	29.29	84.49	48.67	1.20251e+06	1.16618e+06	746983	1.82355e+06	2.34323e+06	2033454	2.42139e+06	424215	1.53986e+06	524947	993873	736276	1.10753e+06	1.08103e+06	2033454	2.06671e+06	236230	1.3854e+06	1
High	Master Protein	B4DDS7	signal recognition particle 54 kDa protein [OS=Homo sapiens]	0	70.406	25	12	56	12	466	51.6	8.92	629	52.17	12	12	Pf00448, Pf01656, Pf02881, Pf02978, Pf03205, Pf09974, Pf13207, Pf13671	6729		SRP54	0.946	0.891	0.942	0.782384	0.722052	0.422587	23.93	23.17	29.94	9.06546e+06	9.40356e+06	9.3173e+06	8.93787e+06	8.87656e+06	8.20058e+06	8.96371e+06	5.16118e+06	9.99673e+06	3.95746e+06	8.01413e+06	9.18374e+06	5.42841e+06	4.09512e+06	8.20058e+06	7.65073e+06	2.87407e+06	8.99401e+06	1
High	Master Protein	B4DDV7	cDNA FLJ57701, highly similar to Homo sapiens Cas-Br-M (murine) ecotropic retroviral transforming sequence-like 1 (CBLL1), mRNA [OS=Homo sapiens]	0	15.2	5	1	6	1	370	40.8	8.35	36	8.26	1	1	Pf13923	79872		CBLL1	1.471	1.03	0.688	0.193578	0.872497	0.355826	31.86	105.46	54.23	243751	403884	310458	464994	358518	481290	319784	72488.1	662869	106408	344208	306008	282414	165399	481290	272943	40366	596380	1
High	Master Protein	B4DDW1	cDNA FLJ52156, moderately similar to Mus musculus methyltransferase like 7A (Mettl7a), mRNA [OS=Homo sapiens]	0	27.463	30	3	24	3	175	20.5	8.92	432	30.63	3	3		25840		METTL7A	0.792	0.656	0.875	0.242595	0.393661	0.946603	22.03	37.18	67.73	2.21047e+06	1.88853e+06	1.84375e+06	1.47759e+06	1.60164e+06	1.05138e+06	2.53868e+06	472933	1.00321e+06	964965	1.60949e+06	1.81732e+06	897414	738904	1.05138e+06	2.16683e+06	263360	902579	1
High	Master Protein	B4DE53	cDNA FLJ61213, highly similar to Tubulin-specific chaperone D [OS=Homo sapiens]	0	79.776	20	13	125	1	849	94.4	6.13	896	95.23	13	13		6904		TBCD	1.021	1.037	1.016	0.950162	0.774248	0.771583	26.78	33.28	47.35	633916	957426	881518	696574	737639	977791	509975	993189	966538	276732	815960	868882	423064	340303	977791	435275	553071	869589	1
High	Master Protein	B4DE54	BTG3 associated nuclear protein isoform 5 [OS=Homo sapiens]	0	8.725	3	1	12	1	505	55.1	5.41	69	3.87	1	1	Pf10523	54971		BANP	1.089	0.666	0.637	0.884856	0.438108	0.257221	28.38	11.75	7.62	399339	279726	231445	325434	285114		222092	169585		174329	238395	228128	197652	131535		189560	94435.8		1
High	Master Protein	B4DE91	cDNA FLJ55534, highly similar to 4-trimethylaminobutyraldehyde dehydrogenase [OS=Homo sapiens]	0	235.238	49	22	282	22	484	52.7	6.06	4268	370.14	22	22	Pf00171	223		ALDH9A1	0.858	0.807	0.817	0.272897	0.959577	0.948658	21.14	61.46	66.52	6.22615e+07	6.47858e+07	6.66229e+07	5.44759e+07	5.22095e+07	6.75868e+07	7.86945e+07	1.18591e+07	6.20583e+07	2.71798e+07	5.52133e+07	6.56679e+07	3.30859e+07	2.40864e+07	6.75868e+07	6.71676e+07	6.60389e+06	5.58335e+07	1
High	Master Protein	B4DEA3	cDNA FLJ56531, highly similar to UV excision repair protein RAD23 homolog B [OS=Homo sapiens]	0	106.994	33	10	132	8	403	42.3	5.43	1156	150.38	10	10	Pf00240, Pf00627, Pf09280, Pf11976, Pf13881	5887		RAD23B	1.282	0.839	0.73	0.210237	0.935292	0.585882	57.09	49.94	44.43	1.65736e+07	2.53227e+07	2.82488e+07	2.66046e+07	2.85387e+07	34335792	2.43792e+07	593455	2.72254e+07	7.2351e+06	2.15811e+07	2.78438e+07	1.61583e+07	1.31661e+07	34335792	2.08082e+07	330474	2.44945e+07	1
High	Master Protein	B4DEA8	cDNA FLJ56425, highly similar to Very-long-chain specific acyl-CoAdehydrogenase, mitochondrial [OS=Homo sapiens]	0	258.389	47	28	268	28	701	75.2	8.88	3932	318.85	28	28	Pf00441, Pf02770, Pf02771, Pf08028				1.351	0.805	0.668	0.109595	0.954559	0.278824	40.25	57.99	41.68	3.72221e+07	3.35076e+07	2.26449e+07	4.4067e+07	4.57561e+07	3.40731e+07	6.03653e+07	9.92371e+06	2.52913e+07	1.6249e+07	2.85566e+07	2.23203e+07	2.67641e+07	2.11092e+07	3.40731e+07	5.15232e+07	5.52616e+06	2.27545e+07	1
High	Master Protein	B4DEC6	cDNA FLJ61214, highly similar to Acid sphingomyelinase-like phosphodiesterase 3b [OS=Homo sapiens]	0.01	1.674	6	1	2	1	249	27.8	6.25	27	0	1	1		27293		SMPDL3B	1.146	0.749	0.651	0.752074	0.582755	0.260902	13.17	10.64	4.23	273338	296744	207333	313228	327243	285408	213190		185732	119324	252899	204362	190239	150970	285408	181963		167102	1
High	Master Protein	B4DEE8	cDNA FLJ56323, highly similar to Methylated-DNA--protein-cysteinemethyltransferase [OS=Homo sapiens]	0	28.164	15	2	20	2	238	25	8.66	428	18.65	2	2	Pf01035, Pf02870	4255	ENSG00000170430.9	MGMT	1.113	0.902	0.767	0.807035	0.969508	0.547919	32.1	48.69	40.21	713698	927542	821644	823197	707075	1.60997e+06	885575	401472	1.24485e+06	311560	790492	809867	499969	326202	1.60997e+06	755859	223566	1.11998e+06	1
High	Master Protein	B4DEH0	mitochondrial ribosomal protein L10, isoform CRA_d [OS=Homo sapiens]	0	5.983	14	2	10	2	222	25.1	8.44	91	7.69	2	2	Pf00466	124995		MRPL10	0.822	0.614	0.737	0.317751	0.297769	0.461971	35.77	27.36	36.9	2.87406e+06	1.87117e+06	1.68831e+06	2.17907e+06	2.30824e+06	1.32603e+06	2.20548e+06	731417	1.43705e+06	1254651	1.59469e+06	1.6641e+06	1.32346e+06	1.06488e+06	1.32603e+06	1.88243e+06	407300	1.2929e+06	1
High	Master Protein	B4DEN6	cDNA FLJ55549, highly similar to 3-ketoacyl-CoA thiolase, peroxisomal [OS=Homo sapiens]	0	75.734	37	7	41	7	356	37.2	8.27	581	54.83	7	7	Pf00108, Pf02803, Pf08541	30		ACAA1	1.666	1.169	1.622	0.00783724	0.359116	0.00264975	24.56	112.35	101	2.80533e+06	2.10306e+06	1.81485e+06	3.7698e+06	4.14009e+06	4.36819e+06	1.01915e+07	771990	4.3192e+06	1.22465e+06	1.79232e+06	1.78884e+06	2.28958e+06	1.90999e+06	4.36819e+06	8698718	429894	3.88596e+06	1
High	Master Protein	B4DEQ0	cDNA FLJ59482, highly similar to Electron transfer flavoprotein-ubiquinone oxidoreductase, mitochondrial [OS=Homo sapiens]	0	8.687	5	3	9	3	556	61.3	6.8	52	6.17	3	2	Pf00890, Pf01266, Pf01494, Pf01946, Pf03486, Pf05187, Pf05834, Pf07992, Pf12831, Pf12838, Pf13450, Pf13454, Pf13738	2110		ETFDH	1.138	0.654	0.884	0.671347	0.40118	0.989261	54.69	38.61	65.49	1.15438e+06	1.23887e+06	1.30752e+06	947573	1.24223e+06	1.27942e+06	1.14398e+06	904430	1.0221e+06	503936	1.05582e+06	1.28877e+06	575509	573093	1.27942e+06	976411	503645	919579	1	Oxidation [P422]
High	Master Protein	B4DEU7	cDNA FLJ56950, highly similar to Homo sapiens FCH domain only 2 (FCHO2), mRNA [OS=Homo sapiens]	0.002	2.912	6	1	2	1	238	26.1	8.38	19	1.68	1	1	Pf10291	115548		FCHO2	1.447	1.242	0.901	0.429467	0.661276	0.797974	50.62	54.12	30.16	58091.3	126125	125741	120168	103275	182472	156370		97886.7	25359.3	107490	123939	72983.8	47645.2	182472	133465		88068.2	1
High	Master Protein	B4DF47	cDNA FLJ52644, highly similar to Homo sapiens misato homolog 1 (MSTO1), mRNA [OS=Homo sapiens]	0	10.927	8	3	14	3	315	34.7	6.65	117	4.98	3	3	Pf10644, Pf14881	100129405		MSTO2P	0.7	0.861	1.252	0.196353	0.821779	0.435243	15.52	13.61	25.77	498818	564684	669036	251604	376210	536584	483259	423218	611263	217755	481249	659446	152812	173561	536584	412473	235675	549950	1
High	Master Protein	B4DF62	cDNA FLJ58794, highly similar to Pogo transposable element with KRAB domain [OS=Homo sapiens]	0	5.316	7	2	4	2	491	55.7	7.18	0	0	2	2	Pf03184, Pf03221, Pf09607	57645		POGK	1.191	1.133	0.952	0.800455	0.802666	0.91294	12.91	16.81	5.54	124536	110886	145919	141904	161189	148278	138131		144255	54365.3	94502.3	143827	86185.3	74363	148278	117898		129786	1
High	Master Protein	B4DFD9	cDNA FLJ55746, moderately similar to Sal-like protein 2 [OS=Homo sapiens]	0	49.878	12	5	21	1	768	80.4	5.54	397	24.54	5	5	Pf00096, Pf13465	6297		SALL2	1.321	1.535	1.162	0.50275	0.358268	0.628184	24.89	24.89	0	283099	197253	168900	260476				302687		123585	168107	166479	158200				168556		1
High	Master Protein	B4DFL1	Dihydrolipoyl dehydrogenase [OS=Homo sapiens]	0	248.664	49	20	393	20	459	48.9	7.49	6417	578.93	20	20	Pf00070, Pf02852, Pf07992	1738		DLD	1.016	0.93	0.866	0.969882	0.669295	0.685402	62.82	113.03	88	1.38833e+08	1.09372e+08	8.94464e+07	1.10249e+08	9.76967e+07	1.2257e+08	1.54696e+08	4.50595e+06	1.23576e+08	6.06067e+07	9.3212e+07	8.81642e+07	6.69598e+07	4.50715e+07	1.2257e+08	1.32036e+08	2.5092e+06	1.11181e+08	1
High	Master Protein	B4DFP1	cDNA FLJ51818, highly similar to Phosphoglucomutase-1 [OS=Homo sapiens]	0	83.171	33	14	79	14	538	58.7	6.05	680	99.4	14	14	Pf00408, Pf02878, Pf02879, Pf02880	5236		PGM1	0.693	0.816	1.031	0.0401459	0.957371	0.269748	24.13	52.51	97.59	7.20661e+06	1.08146e+07	1.56045e+07	6.32022e+06	5.68209e+06	1.047e+07	1.28909e+07	1.06434e+06	7.9429e+06	3.14599e+06	9.21665e+06	1.53808e+07	3.83858e+06	2.62138e+06	1.047e+07	1.10027e+07	592693	7.14618e+06	1
High	Master Protein	B4DFR2	cDNA FLJ59194, moderately similar to Dynein light chain 2A, cytoplasmic [OS=Homo sapiens]	0	33.706	40	3	18	3	121	13.4	10.08	326	24.07	3	3	Pf03259	83658		DYNLRB1	1.199	1.076	1.08	0.36553	0.537049	0.325892	57.94	52.42	37.41	1.29863e+06	2.48035e+06	3.20113e+06	2.9302e+06	2.04919e+06	3.57691e+06	3.21076e+06	54504	2.98873e+06	566906	2.11386e+06	3.15524e+06	1.77965e+06	945373	3.57691e+06	2.74046e+06	30351.3	2.68894e+06	1
High	Master Protein	B4DFS4	cDNA FLJ52143, highly similar to Transmembrane protein 101 [OS=Homo sapiens]	0.003	2.461	5	1	2	1	199	21.9	9.48	31	1.88	1	1	Pf15111	84336		TMEM101	0.738	0.523	0.589	0.23301	0.204002	0.161149	10.43	23.45	34.28	604866	554171	333356	371687	427253		456164	120831		264050	472289	328577	225744	197109		389347	67286.3		1
High	Master Protein	B4DG61	cDNA FLJ56430, highly similar to Polyhomeotic-like protein 2 [OS=Homo sapiens]	0	23.809	9	4	14	4	572	61.9	8.19	106	13.25	4	4	Pf00536, Pf07647	1912		PHC2	1.062	0.838	0.751	0.816954	0.854218	0.523902	24.27	44.04	39.69	1.33627e+06	1.63077e+06	1.65429e+06	1.95026e+06	1.21377e+06	1.79555e+06	1.38006e+06	606099	2.22024e+06	583338	1.38981e+06	1.63058e+06	1.18449e+06	559963	1.79555e+06	1.17791e+06	337515	1.99754e+06	1
High	Master Protein	B4DGC1	cDNA FLJ59877, highly similar to LAG1 longevity assurance homolog 5 [OS=Homo sapiens]	0.001	3.971	10	1	4	1	195	22.2	9.16	28	1.85	1	1	Pf00046	91012		CERS5	1.026	1.209	1.294	0.864955	0.693129	0.435095	27.89	25.73	26.17	148327	176225	128984	154053	105676	180741	153752		215984	64751	150187	127135	93563.8	48752.5	180741	131231		194320	1
High	Master Protein	B4DGC5	cDNA FLJ60491, highly similar to IQ motif and Sec7 domain-containing protein 1 [OS=Homo sapiens]	0.001	4.033	2	2	4	2	1114	124.3	8.35	13	0	2	2	Pf01369	9922		IQSEC1	1.201	1.345	1.049	0.565941	0.448391	0.777557	39.69	36.73	44.71	175160	344345	318973	270013	235472	572816	505984	269041	446553	76464.9	293466	314401	163992	108633	572816	431869	149819	401762	1
High	Master Protein	B4DGD0	cDNA FLJ50491, highly similar to Amyloid beta A4 protein (APP) (ABPP)(Alzheimer disease amyloid protein) (Cerebral vascularamyloid peptide) (CVAP) (Protease nexin-II) (PN-II)(APPI) (PreA4) [OS=Homo sapiens]	0	89.994	16	8	70	8	714	80.8	4.82	635	88.52	8	8	Pf00014, Pf02177, Pf03494, Pf03938, Pf10515, Pf11740, Pf12924, Pf12925, Pf13868	351		APP	1.732	1.223	0.747	0.00141809	0.21724	0.55591	53.91	52.77	39.48	5.6817e+06	5.14416e+06	3.73938e+06	8.765e+06	6.25474e+06	1.32403e+07	5.60398e+06	452805	9.9731e+06	2.48031e+06	4.38408e+06	3.68578e+06	5.32342e+06	2885565	1.32403e+07	4.78313e+06	252151	8.97275e+06	1
High	Master Protein	B4DGE7	cDNA FLJ61235, weakly similar to WD repeat protein YBL104C [OS=Homo sapiens]	0	23.025	7	4	22	4	875	98.6	6.8	166	13.94	4	4		54468		MIOS	1.23	1.052	0.797	0.512207	0.770847	0.613751	23.29	32.03	32.11	789862	940882	621544	694201	726636	1.11831e+06	716351	375854	630727	344809	801862	612635	421623	335227	1.11831e+06	611423	209300	567462	1
High	Master Protein	B4DGG0	cDNA FLJ58989, moderately similar to ADP-ribosylation factor-like protein 2 [OS=Homo sapiens]	0	9.171	14	3	10	3	194	22.2	8.43	117	3.78	3	2	Pf00025, Pf00071, Pf00503, Pf01926, Pf04670, Pf08477, Pf09439	402		ARL2	0.811	0.696	0.828	0.259071	0.495457	0.764455	14.46	13.94	18.15	2.76288e+06	2.76022e+06	2.84738e+06	2.24228e+06	2.20914e+06	2.07056e+06	1.6558e+06	2.35339e+06	2.49768e+06	1.20612e+06	2.35238e+06	2.80657e+06	1.36185e+06	1.01917e+06	2.07056e+06	1.41327e+06	1.31052e+06	2.24715e+06	1
High	Master Protein	B4DGM5	cDNA FLJ53983, highly similar to IWS1 homolog [OS=Homo sapiens]	0	29.684	9	5	36	5	729	82.1	4.78	202	23.08	5	5	Pf05297, Pf08711	55677		IWS1	1.077	0.75	0.775	0.755128	0.640416	0.587074	32.64	16.67	29.39	1.96333e+06	2.04863e+06	2.4163e+06	2.43422e+06	3.01417e+06	1.86884e+06	1.369e+06	1.20759e+06	1.88869e+06	857079	1.74593e+06	2.38167e+06	1.47842e+06	1.39056e+06	1.86884e+06	1.16847e+06	672466	1.69924e+06	1
High	Master Protein	B4DGM9	torsin family 1, member A (torsin A), isoform CRA_a [OS=Homo sapiens]	0	12.257	12	3	6	3	364	40.8	7.99	16	0	3	3	Pf06309	1861		TOR1A	0.871	0.621	0.828	0.50907	0.334945	0.795002	31.6	16.94	28.26	1.84423e+06	1.41112e+06	1.17468e+06	1.07261e+06	1.53851e+06	796011	1.20058e+06	798044	778993	805084	1.20262e+06	1.15784e+06	651451	709777	796011	1.02472e+06	444402	700856	1
High	Master Protein	B4DGR3	cDNA FLJ54349, highly similar to Vesicle-fusing ATPase [OS=Homo sapiens]	0	105.133	25	15	167	15	702	77.8	6.95	1575	181.01	15	15	Pf00004, Pf00910, Pf01078, Pf02359, Pf05272, Pf05496, Pf06068, Pf07724, Pf07728, Pf13173, Pf13191, Pf13207, Pf13401	4905		NSF	0.803	0.591	0.803	0.23879	0.300496	0.928328	21.68	20.69	39.25	1.82995e+07	1.78399e+07	1.8712e+07	1.54913e+07	1.62947e+07	1.22645e+07	1.40916e+07	5.66727e+06	1.43351e+07	7.9885e+06	1.52039e+07	1.84438e+07	9.40862e+06	7.51742e+06	1.22645e+07	1.20275e+07	3.1559e+06	1.28972e+07	1
High	Master Protein	B4DGS9	cDNA FLJ58364, highly similar to Sideroflexin-5 [OS=Homo sapiens]	0.002	2.607	4	1	6	1	236	25.5	9.35	22	5.75	1	1	Pf03820	94097		SFXN5	0.84	0.935	1.165	0.487899	0.96715	0.595108	62.48	88.8	106.27	401664	364904	228444	306486	501206	118099	639892		125440	175344	310987	225170	186144	231227	118099	546163		112858	1
High	Master Protein	B4DGT0	cDNA FLJ54083, highly similar to NG,NG-dimethylarginine dimethylaminohydrolase 1 [OS=Homo sapiens]	0	42.581	29	4	34	3	192	21.3	5.6	395	19.15	4	4	Pf02274	23576		DDAH1	1.889	2.304	0.943	0.0799136	0.0484652	0.999761	82.24	137.4	104	208577	134479	174986	371273	147176	2.06808e+06	2.17604e+06	84608.6	720056	91052.7	114609	172478	225492	67898.3	2.06808e+06	1.8573e+06	47115.5	647831	1
High	Master Protein	B4DGY1	cDNA FLJ61245, highly similar to Homo sapiens kinase D-interacting substance of 220 kDa (KIDINS220), mRNA [OS=Homo sapiens]	0	7.498	2	2	7	2	994	111.5	7.59	78	3.56	2	1	Pf00023, Pf07693, Pf12796, Pf13606, Pf13637, Pf13857	57498		KIDINS220	0.788	0.428	0.504	0.278131	0.0483175	0.0438126	37.76	7.39	14.8	1.614e+06	958231	810754	942409	1.82296e+06	371542	517252	743017	211501	704581	816647	799132	572372	841004	371542	441487	413759	190286	1
High	Master Protein	B4DH07	cDNA FLJ53321, highly similar to Homo sapiens pitrilysin metallopeptidase 1 (PITRM1), mRNA [OS=Homo sapiens]	0	132.622	24	18	142	18	1030	116.2	6.67	1035	139.76	18	18	Pf00675, Pf05193, Pf08367	10531		PITRM1	1.265	1.128	0.806	0.165085	0.253006	0.921713	35.35	56.28	52.08	1.01263e+07	7.68343e+06	6.04199e+06	1.03691e+07	1.07953e+07	1.36214e+07	1.26569e+07	1.53273e+06	1.00248e+07	4.42055e+06	6.54816e+06	5.95538e+06	6.29768e+06	4.98031e+06	1.36214e+07	1.0803e+07	853523	9019300	1
High	Master Protein	B4DH21	cDNA FLJ58505, highly similar to Cyclin-T2 [OS=Homo sapiens]	0.001	3.116	2	1	2	1	488	53.7	9.41	0	0	1	1		905		CCNT2	0.992	0.581	0.571	0.802843	0.266368	0.173041	53.1	14.77	13.41	120278	159009	225611	161691	223718	75825.7			92359.2	52506.7	135514	222377	98202.8	103210	75825.7			83095.1	1
Medium	Master Protein	B4DH23	alpha-mannosidase 2C1 [OS=Homo sapiens]	0.016	1.206	4	1	5	1	209	23.4	5.9	0	5.05	1	1	Pf02837	4123	ENSG00000140400.16	MAN2C1	2.168	1.353	0.624	0.00509364	0.439272	0.179524	117.1	11.87	30.29	656547	347085	603990	1.30931e+06	2.75182e+06	275138		817444		286611	295801	595332	795209	1.26952e+06	275138		455206		1
High	Master Protein	B4DH26	DCN1-like protein [OS=Homo sapiens]	0	5.34	8	2	14	1	232	27.4	5.44	49	0	2	2	Pf03556	23142		DCUN1D4	0.61	1	1.64	0.111377	0.999444	0.228915	3.29	4.81	9.14		122518	130730	72533.3	82041.9		126538				104415	128856	44053.1	37849.3		108003			1
High	Master Protein	B4DH89	cDNA FLJ55560, highly similar to Retinal dehydrogenase 2 [OS=Homo sapiens]	0	92.076	26	11	76	1	489	53.8	6.09	779	91.4	11	11	Pf00171, Pf05893	8854		ALDH1A2																												1
High	Master Protein	B4DHE8	RNA-binding protein Musashi homolog 2 [OS=Homo sapiens]	0	76.433	30	7	39	6	324	34.8	8.88	761	72.91	6	7	Pf00076, Pf13893, Pf14259	124540	ENSG00000153944.10	MSI2	1.529	1.037	0.644	0.017212	0.57226	0.175679	48.22	61.31	19.35	3.06829e+06	4.62495e+06	3.39848e+06	6.93654e+06	7.15098e+06	4.13859e+06	3.90795e+06	3.85419e+06	2.54877e+06	1.33944e+06	3.94158e+06	3.34976e+06	4.21291e+06	3.29904e+06	4.13859e+06	3.33553e+06	2.14626e+06	2.29312e+06	1
High	Master Protein	B4DHJ4	cDNA FLJ57931, highly similar to MORC family CW-type zinc finger 3 [OS=Homo sapiens]	0	8.861	4	2	8	2	868	99.2	5.57	18	2.51	2	2	Pf04111, Pf05622, Pf07496, Pf11932, Pf13589	23515		MORC3	1.135	1.379	1.153	0.710531	0.443637	0.614973	22.78	27.94	12.9	189979	268621	330995	321255	215717	351884	370874		369953	82934.1	228930	326250	195114	99519.2	351884	316550		332845	1
High	Master Protein	B4DHQ5	cDNA FLJ57110 [OS=Homo sapiens]	0.001	3.307	8	1	2	1	273	31.4	9.48	0	0	1	1	Pf15122	55248		TMEM206	0.8	0.734	0.91	0.383152	0.576732	0.866282	26.97	8.54	21.11	431991	392411	299571	313939	379768	171547	302396		269785	188583	334430	295277	190671	175202	171547	258102		242725	1
High	Master Protein	B4DHQ9	cDNA FLJ51850, highly similar to T-cell immunomodulatory protein [OS=Homo sapiens]	0	9.833	5	1	10	1	272	30.5	7.14	233	6.48	1	1		81533		ITFG1	0.835	0.635	0.755	0.455147	0.388295	0.485247	10.73	4.2	5.79	431007	463843	349819	387097	364329	261599	283635		264108	188153	395307	344805	235104	168080	261599	242089		237617	1
High	Master Protein	B4DHW9	pantothenate kinase 4 [OS=Homo sapiens]	0	34.326	13	8	29	8	781	86.9	6.4	172	17.47	8	7	Pf01937, Pf03630	55229		PANK4	1.097	1.569	1.342	0.809667	0.141351	0.0605117	43.94	67.87	80.08	604874	969654	673968	738444	623665	2.08639e+06	1.52681e+06	470900	1.81441e+06	264054	826382	664308	448494	287722	2.08639e+06	1.30317e+06	262227	1.63242e+06	1
High	Master Protein	B4DHX0	cDNA FLJ51555, highly similar to Squalene monooxygenase [OS=Homo sapiens]	0	25.425	15	4	18	4	379	42.6	8.79	307	20.61	4	4	Pf08491	6713		SQLE	1.03	0.631	0.589	0.914381	0.343194	0.1053	55.42	16.89	13.38	2.16921e+06	2.30868e+06	1.22984e+06	2.18384e+06	2.65501e+06	599703	1.47514e+06	693440	548201	946954	1.96756e+06	1.21221e+06	1.32636e+06	1.22486e+06	599703	1.25907e+06	386152	493214	1
High	Master Protein	B4DI08	cDNA FLJ60091, highly similar to Hypoxia-inducible factor 1 alpha inhibitor [OS=Homo sapiens]	0	4.309	3	1	6	1	383	44.2	6.2	34	8.45	1	1	Pf02373, Pf08007, Pf13621	55662		HIF1AN	0.954	0.783	0.818	0.816475	0.655383	0.711152	15.52	50.13	54.71	540539	486409	685424	517395	464028	600522	423102	154876	656593	235968	414539	675599	314240	214075	600522	361128	86245	590733	1
High	Master Protein	B4DI59	cDNA FLJ59527 [OS=Homo sapiens]	0	20.795	16	5	35	5	353	38.9	6.61	295	30.2	5	5	Pf01266	55572		FOXRED1	0.958	0.745	0.812	0.788802	0.62205	0.682792	28.46	14.36	19.14	3.96229e+06	3.1809e+06	2.54954e+06	2.95274e+06	3.64006e+06	1.49343e+06	2.65344e+06	2.24085e+06	1.45e+06	1.72971e+06	2.7109e+06	2.513e+06	1.79335e+06	1.67931e+06	1.49343e+06	2.26477e+06	1.24785e+06	1.30456e+06	1
High	Master Protein	B4DID1	cDNA FLJ60265, highly similar to Adenylate cyclase type 2 [OS=Homo sapiens]	0	10.968	7	3	6	3	838	94.8	8.13	24	3.5	3	3	Pf00211, Pf06327	108		ADCY2	0.01	0.01		1e-17	1e-17					515652									225104									1
High	Master Protein	B4DIJ4	cDNA FLJ51207, highly similar to VPS10 domain-containing receptor SorCS2 [OS=Homo sapiens]	0	6.996	4	2	6	2	1002	112.2	5.97	44	2.06	2	2	Pf00801	57537		SORCS2	1.308	0.891	0.658	0.375218	0.880836	0.317728	69.87	54.11	10.52	139653	592906	519964	632796	572189	447626	419916	86532.6	364836	60964.6	505300	512510	384329	263974	447626	358408	48186.9	328242	1
High	Master Protein	B4DIZ6	cDNA FLJ57941, highly similar to Nucleoside diphosphate-linked moiety X motif16 [OS=Homo sapiens]	0	11.685	21	3	25	2	149	16.3	6.09	305	15.39	3	2		131870		NUDT16	0.642	0.67	0.872	0.0593594	0.428574	0.847572	8.46	13.38	49.32	858091	1.03044e+06	1.09407e+06	665711	773055	799833	818292	254130	790704	374594	878182	1.07839e+06	404320	356642	799833	698432	141516	711393	1
High	Master Protein	B4DJ30	cDNA FLJ61290, highly similar to Neutral alpha-glucosidase AB [OS=Homo sapiens]	0	642.59	55	49	1321	49	995	112.9	6.06	15063	1712.21	49	49	Pf01055, Pf04901, Pf13802				1.013	0.758	0.762	0.950891	0.793807	0.731311	37.57	47.06	45.65	3.92064e+08	3.81292e+08	3.53967e+08	3.76694e+08	3.70056e+08	4.73533e+08	3.67813e+08	8.62732e+07	4.24374e+08	1.71153e+08	3.24954e+08	3.48894e+08	2.28785e+08	1.70722e+08	4.73533e+08	3.13937e+08	4.80424e+07	3.81807e+08	1
High	Master Protein	B4DJ71	phosphate transporter [OS=Homo sapiens]	0	35.407	16	3	16	3	454	49.2	6.6	283	19.45	3	2	Pf01384	6575		SLC20A2	1.2	1.265	0.958	0.564389	0.419029	0.82442	56.01	44.83	44.12	1.24211e+06	812810	570632	1.43524e+06	808975	402753	1.02368e+06		929987	542236	692713	562452	871695	373213	402753	873735		836704	1
High	Master Protein	B4DJ86	cDNA FLJ55216, highly similar to Protein farnesyltransferase subunit beta [OS=Homo sapiens]	0	5.923	7	2	8	2	245	26.8	6.35	83	1.71	2	2	Pf00432, Pf13249	2342		FNTB	0.833	0.72	0.959	0.442468	0.521361	0.929502	16.76	38.71	28.34	697908	800673	922291	679662	751015	590824	735917	213523	723879	304667	682369	909071	412793	346474	590824	628123	118903	651270	1
High	Master Protein	B4DJ98	cDNA FLJ53558, highly similar to Protein disulfide-isomerase A3 [OS=Homo sapiens]	0	347.762	51	25	707	1	461	51.4	5.92	10960	1034.61	25	25	Pf00085, Pf13098, Pf13848, Pf13899, Pf13905	171423		PDIA3P; PDIA3P1	2.858	0.623	0.218	0.000521854	0.364506	2.98356e-05	71.73	5.17	2.69	454964		373531	1.91793e+06	1.17831e+06	541569		233892	281588	198611		368177	1.16485e+06	543602	541569		130246	253343	1	Oxidation [K75; P208; P245]
High	Master Protein	B4DJB4	Isocitrate dehydrogenase [NAD] subunit, mitochondrial [OS=Homo sapiens]	0	90.078	37	10	105	10	316	34.5	6.44	986	95.93	10	10	Pf00180	3419		IDH3A	1.323	1.135	0.792	0.0965758	0.241303	0.850529	44.23	76.46	51.6	1.17286e+07	9.61414e+06	7.15876e+06	1.32095e+07	1.40177e+07	1.4771e+07	1.98815e+07	5.35234e+06	9.69276e+06	5.12002e+06	8.1936e+06	7.05614e+06	8.02277e+06	6.46692e+06	1.4771e+07	1.69694e+07	2.98053e+06	8.72053e+06	1
High	Master Protein	B4DJK9	Perilipin [OS=Homo sapiens]	0	172.952	52	13	168	13	409	45.1	7.01	2492	194.19	13	13	Pf03036	123		PLIN2	0.773	0.463	0.657	0.141756	0.0641844	0.196792	25.59	17.87	36.66	2.28293e+07	2.22715e+07	1.35509e+07	1.63162e+07	1.65022e+07	7.32733e+06	1.40895e+07	3.69757e+06	7.53107e+06	9.96598e+06	1.89807e+07	1.33566e+07	9.90966e+06	7.61312e+06	7.32733e+06	1.20257e+07	2.05904e+06	6.77567e+06	1
High	Master Protein	B4DJL3	cDNA FLJ51219, highly similar to Homo sapiens mediator of RNA polymerase II transcription, subunit 18 homolog (MED18), mRNA [OS=Homo sapiens]	0.002	2.892	4	1	4	1	215	24.4	6.54	0	0	1	1	Pf09637	54797		MED18	1.103	1.308	0.966	0.787236	0.506513	0.99058	52.44	81.14	96.07	202329	340306	313066	223189	250236	695859	409570	130345	672067	88325.3	290024	308578	135554	115444	695859	349577	72584.5	604655	1
High	Master Protein	B4DJM7	cDNA FLJ52867, highly similar to Rho guanine nucleotide exchange factor 16 [OS=Homo sapiens]	0	6.211	5	1	2	1	413	47.2	7.5	24	2.68	1	1	Pf00169, Pf00621	27237		ARHGEF16	100	100	1.909	1e-17	1e-17	0.0503741			0						208309	397561								208309	339328			1
High	Master Protein	B4DJQ5	cDNA FLJ59211, highly similar to Glucosidase 2 subunit beta [OS=Homo sapiens]	0	236.583	59	23	394	23	535	60.1	4.42	5066	441.54	23	23	Pf07915, Pf12999, Pf13015	5589		PRKCSH	0.904	0.518	0.73	0.439669	0.122623	0.549775	38.98	29.24	46.21	1.30108e+08	1.27523e+08	1.26948e+08	1.0274e+08	1.25643e+08	7.74113e+07	1.01404e+08	9.46288e+06	8.1315e+07	5.67977e+07	1.08681e+08	1.25128e+08	6.2399e+07	5.79644e+07	7.74113e+07	8.65504e+07	5.26954e+06	7.31587e+07	1	Oxidation [K466]
High	Master Protein	B4DJU4	cDNA FLJ53344, highly similar to Splicing factor 1 [OS=Homo sapiens]	0	152.925	22	13	253	13	630	67.3	9.09	2490	382.16	13	13	Pf00013, Pf00098, Pf13014	7536		SF1	1.155	0.953	0.88	0.446297	0.608529	0.609292	46.23	104.53	87.97	3.65263e+07	3.88787e+07	4.48676e+07	4.99705e+07	4.33e+07	4.65363e+07	3.76871e+07	4.62144e+06	5.34765e+07	1.59453e+07	3.31341e+07	4.42244e+07	3.03496e+07	1.9976e+07	4.65363e+07	3.21668e+07	2.57351e+06	4.81125e+07	1
High	Master Protein	B4DJU5	cDNA FLJ53011, highly similar to Homo sapiens cytokine receptor-like factor 3 (CRLF3), mRNA [OS=Homo sapiens]	0.002	2.79	8	1	4	1	326	36.4	5.24	0	0	1	1	Pf00041	51379		CRLF3	1.09	0.879	0.997	0.954584	0.803416	0.982607	57.49	40	56.7	72863.3	202970	211571	96096.8		225897	116126	185983	161291	31808	172980	208538	58364.4		225897	99116.5	103567	145112	1
High	Master Protein	B4DJW8	cDNA FLJ55697, highly similar to Protein transport protein Sec23B [OS=Homo sapiens]	0	81.024	21	12	91	9	749	84.4	6.99	790	86.99	12	11	Pf00626, Pf04810, Pf04811, Pf04815, Pf08033	10483		SEC23B	1.732	1.337	0.73	0.00333436	0.16569	0.464047	25.42	56.26	24.83	2.34388e+06	3.15156e+06	2.88275e+06	4.277e+06	5.17604e+06	7177531	4.93231e+06	1.71244e+06	4.7348e+06	1.02321e+06	2.6859e+06	2.84143e+06	2.59764e+06	2.38792e+06	7177531	4.20984e+06	953596	4.25988e+06	1
Medium	Master Protein	B4DK52	cDNA FLJ50787, highly similar to HECT domain and RCC1-like domain protein 3 [OS=Homo sapiens]	0.021	1.02	2	1	2	1	494	56.5	5.54	0	0	1	1	Pf00632	8916		HERC3	1.24	0.519	0.855	0.515308	0.173283	0.75262	93.43	9.74	85.85	392474	523903	483454	599689	1.4133e+06	221798	250796	2.64943e+06	189599	171332	446494	476524	364221	652012	221798	214060	1475371	170581	1	Oxidation [P371]
High	Master Protein	B4DK65	cDNA FLJ58537, highly similar to Sal-like protein 2 [OS=Homo sapiens]	0	41.693	11	5	23	1	906	95.4	6.24	338	22.73	5	5	Pf00096, Pf13465	6297		SALL2	0.865	0.879	0.94	0.461055	0.909416	0.937583	13.89	28.45	56.66	1.10669e+06	1.2312e+06	1.21426e+06	1.14934e+06	915239	879032	49062.3	753774	1.2024e+06	483116	1.04928e+06	1.19685e+06	698049	422237	879032	41875.8	419750	1.08179e+06	1
High	Master Protein	B4DKM0	cDNA FLJ51883, highly similar to Mitochondrial 39S ribosomal protein L3 [OS=Homo sapiens]	0	75.659	37	11	103	11	375	41.6	9.58	959	139.08	11	11	Pf00297	11222		MRPL3	0.96	0.604	0.834	0.845592	0.339977	0.920998	35.72	17.99	44.38	1.21905e+07	1.17105e+07	1.15851e+07	1.26935e+07	1.27775e+07	6.19409e+06	1.31405e+07	4.74589e+06	7.57317e+06	5.32167e+06	9.98018e+06	1.1419e+07	7.70942e+06	5894761	6.19409e+06	1.12158e+07	2.64282e+06	6.81355e+06	1
High	Master Protein	B4DKM6	cDNA FLJ54305, highly similar to Serum paraoxonase/arylesterase 2 [OS=Homo sapiens]	0	111.228	33	7	183	7	363	40	5.73	2855	234.1	7	6	Pf01731, Pf08450	5445		PON2	1.14	0.827	0.802	0.507753	0.957102	0.980199	36.81	57.28	40.05	2.15444e+07	2.18952e+07	1.26898e+07	2.25965e+07	2.16348e+07	2.12335e+07	2.07517e+07	3.91656e+06	1.65033e+07	9.40505e+06	1.86601e+07	1.25079e+07	1.3724e+07	9.98101e+06	2.12335e+07	1.77121e+07	2.18099e+06	1.4848e+07	1
High	Master Protein	B4DKP8	cDNA FLJ52317, highly similar to tRNA-dihydrouridine synthase 2-like [OS=Homo sapiens]	0	5.195	4	2	3	1	458	51.3	7.33	16	2.3	1	2	Pf00035, Pf01207	54920		DUS2; DUS2L	1.147	1.491	1.176	0.896033	0.417369	0.665004	26.34	58.47	49.07	84071.2	100221	136368	96454.8	113592	177176	208426	75911.9	149424	36700.7	85412.5	134413	58581.8	52404.6	177176	177896	42272.6	134436	1
High	Master Protein	B4DKS0	cDNA FLJ53381, highly similar to Monocarboxylate transporter 1 [OS=Homo sapiens]	0	112.071	14	8	195	8	480	51.8	8.5	1789	255.66	8	8	Pf07690, Pf12832	6566		SLC16A1	1.182	0.418	0.351	0.364507	0.0234505	9.66153e-07	98.92	20.56	16.66	8.20777e+07	6.90983e+07	4.52276e+07	8.37144e+07	1.12787e+08	5.83483e+07	9.14266e+07	2.43333e+06	5.00713e+07	3.58304e+07	5.88887e+07	4.45793e+07	5.08439e+07	5.20332e+07	5.83483e+07	7.80347e+07	1.35504e+06	4.50489e+07	1
High	Master Protein	B4DKU9	Coronin [OS=Homo sapiens]	0	23.903	7	5	30	1	906	98.4	5.67	342	32.1	5	5	Pf00400, Pf08953, Pf08954	79585		CORO7	1.186	2.172	1.479	0.75315	0.0832896	0.23377	22.02	46.07	77.67	194912	196180	205487	232736	198163	648084	317558		594945	85087.5	167194	202542	141352	91420.6	648084	271043		535269	1
High	Master Protein	B4DKX4	cDNA FLJ58014, highly similar to Homo sapiens programmed cell death 4, transcript variant 1, mRNA [OS=Homo sapiens]	0	126.372	42	13	144	13	455	50.2	5.47	1812	186.4	13	13	Pf02847	27250		PDCD4	1.008	0.478	0.531	0.984466	0.0750713	0.0141436	44.51	14.34	22.34	1.67235e+07	2.19672e+07	1.9003e+07	2.22315e+07	2.00279e+07	1.26294e+07	1.25915e+07	5.02489e+06	1.4077e+07	7.30052e+06	1.87215e+07	18730626	1.35023e+07	9.23969e+06	1.26294e+07	1.07472e+07	2.79818e+06	1.2665e+07	1
High	Master Protein	B4DKY1	Cysteine--tRNA ligase, cytoplasmic [OS=Homo sapiens]	0	32.342	8	5	27	5	739	84.2	7.05	107	32.68	5	5	Pf01406, Pf09334	833	ENSG00000278191.4; ENSG00000110619.17	CARS	0.869	1.21	1.193	0.438174	0.291379	0.150622	43.89	83.63	84.4	2.27808e+06	2.96956e+06	3.63706e+06	2.72405e+06	2.38798e+06	5.08211e+06	4.12227e+06	430014	4.56652e+06	994481	2.53079e+06	3.58492e+06	1.65445e+06	1.10167e+06	5.08211e+06	3.51845e+06	239459	4.10847e+06	1
High	Master Protein	B4DKZ2	cDNA FLJ56653, highly similar to Ribosomal protein S6 kinase alpha-3 [OS=Homo sapiens]	0	41.377	11	6	62	3	710	80.5	8.41	516	53.67	6	6	Pf00069, Pf00433, Pf07714, Pf14531	6197		RPS6KA3	1.049	1.073	0.953	0.871237	0.450879	0.65126	42.54	42.79	27.64	2.5108e+06	4.14449e+06	5.14985e+06	3.24649e+06	3.87028e+06	6692039	4.28598e+06	2.70612e+06	5.47591e+06	1.09607e+06	3.53211e+06	5.07603e+06	1.97175e+06	1.78552e+06	6692039	3.65819e+06	1.50694e+06	4.92665e+06	1
High	Master Protein	B4DL04	cDNA FLJ51229, highly similar to Ephrin type-A receptor 2 [OS=Homo sapiens]	0	8.838	4	2	6	1	654	73	8.4	40	4.84	2	2	Pf00041, Pf00069, Pf00536, Pf07647, Pf07714, Pf09294, Pf14575	1969		EPHA2	1.504	0.96	0.6	0.167938	0.999712	0.178089	18	39.19	10.22	326757	325450	232034	430839	490380		275890	222660	508706	142644	277363	228708	261670	226232		235478	123991	457681	1
High	Master Protein	B4DL07	cDNA FLJ53353, highly similar to ATP-binding cassette sub-family D member 3 [OS=Homo sapiens]	0	63.541	20	11	79	11	683	78.4	9.11	782	65.69	11	11	Pf00005, Pf06472	5825		ABCD3	1.098	0.994	0.882	0.545185	0.513225	0.804474	44.44	39.55	38.16	7.60497e+06	6.21972e+06	5.3336e+06	6.95886e+06	1.05813e+07	6.24322e+06	8.62009e+06	5.38702e+06	4.54076e+06	3.3199e+06	5.30072e+06	5.25715e+06	4.22646e+06	4.8816e+06	6.24322e+06	7.35745e+06	2.99984e+06	4.0853e+06	1
High	Master Protein	B4DL13	cDNA FLJ56547, highly similar to Homo sapiens DEAD/H (Asp-Glu-Ala-Asp/His) box polypeptide 26 (DDX26), mRNA [OS=Homo sapiens]	0.003	2.461	2	1	5	1	289	32	6.07	66	0	1	1	Pf00092, Pf13519	26512		INTS6	0.875	0.691	0.912	0.560888	0.454891	0.84885	39.16	21.49	42.68	73241.5	137756	141779	104312	162158	64118	96744.5	95149.6	65959.9	31973.1	117402	139747	63353.9	74810.2	64118	82573.7	52985.4	59343.8	1
High	Master Protein	B4DL14	ATP synthase subunit gamma [OS=Homo sapiens]	0	141.624	42	12	299	1	250	27.5	7.42	4972	400.74	12	12	Pf00231	509		ATP5C1	0.859	0.204	0.753	0.439397	0.000116226	0.536952	101.97	5.3	80.16	311430	1.36761e+06	1.17046e+06	1.17541e+06	1.12326e+06	18433.9	885595	239167	40213	135953	1165536	1.15369e+06	713885	518208	18433.9	755876	133184	36179.4	1
High	Master Protein	B4DL80	cDNA FLJ57525, highly similar to Cell division cycle protein 27 homolog [OS=Homo sapiens]	0	6.593	3	2	8	2	763	84.8	7.31	17	1.96	2	2	Pf00515, Pf07719, Pf12895, Pf13181, Pf13371, Pf13414, Pf13424, Pf13431, Pf13432, Pf14559	996		CDC27	0.924	0.52	0.629	0.739625	0.198315	0.21939	17.16	7.43	17.17	469409	466448	407761	431774	450372	231177	129717	370867	185293	204917	397528	401916	262238	207775	231177	110717	206523	166707	1
High	Master Protein	B4DL81	cDNA FLJ56369, highly similar to Homo sapiens phosphatidylglycerophosphate synthase 1 (PGS1), mRNA [OS=Homo sapiens]	0	7.468	3	1	6	1	556	62.7	9	108	5.26	1	1		9489		PGS1	1.016	0.731	0.735	0.976618	0.555351	0.431427	30.01	36.95	34.85	349944	284829	210650	348057	301432	214074	255661	59699.6	225760	152766	242744	207631	211392	139063	214074	218213	33244.6	203115	1
High	Master Protein	B4DLB8	cDNA FLJ52205, highly similar to Beta-1,4-galactosyltransferase 1 [OS=Homo sapiens]	0	7.433	6	2	10	2	355	39.9	8.5	89	3.95	2	2	Pf02709, Pf10111, Pf13733	2683		B4GALT1	1.513	1.066	0.673	0.11107	0.660645	0.284959	43.94	91.83	39.18	1.22326e+06	1.20802e+06	742541	1.38736e+06	1.84757e+06	1.87381e+06	2.57804e+06	373062	1.1733e+06	534006	1.02953e+06	731897	842610	852358	1.87381e+06	2.20042e+06	207745	1.05561e+06	1
High	Master Protein	B4DLD0	hexosyltransferase [OS=Homo sapiens]	0	4.374	4	2	7	2	530	61.5	9.14	0	0	2	2	Pf02709, Pf05679, Pf10111	22856		CHSY1	1.059	0.971	0.927	0.874303	0.984707	0.932518	26.83	33.53	27.08	417213	434243	438050	435207	406836	532117	369265	538828	430022	182131	370081	431770	264323	187690	532117	315177	300054	386889	1
High	Master Protein	B4DLE7	cDNA FLJ50983, highly similar to Homo sapiens lysocardiolipin acyltransferase (LYCAT), transcript variant 1, mRNA [OS=Homo sapiens]	0	14.99	11	4	12	4	329	38.7	8.16	68	8.65	4	4	Pf01553	253558		LCLAT1	0.647	0.569	0.816	0.0641966	0.251866	0.657105	16.97	7.99	49.02	794361	1.75866e+06	558666	1.24309e+06	1.05823e+06	712766	356811	170095	926884	346773	1.49881e+06	550658	754991	488204	712766	304546	94720	833913	1
High	Master Protein	B4DLJ5	cDNA FLJ55716, highly similar to Desmocollin-2 [OS=Homo sapiens]	0	37.315	6	4	23	4	912	101	5.27	171	29.57	4	4	Pf00028, Pf01049, Pf08758	1824		DSC2	2.211	1.575	0.607	0.00336653	0.167033	0.135728	40.16	48.73	29.9	280003	639126	604974	1.27586e+06	1.64233e+06	2.28528e+06	1.43697e+06	88376.6	1.03364e+06	122233	544691	596302	774893	757676	2.28528e+06	1226490	49213.8	929960	1
High	Master Protein	B4DLN7	cDNA FLJ59248, highly similar to Homo sapiens cytochrome P450, family 20, subfamily A, polypeptide 1, transcript variant 1, mRNA [OS=Homo sapiens]	0	10.185	6	3	12	3	470	53.4	6.21	43	3.76	3	3	Pf00067	57404		CYP20A1	1.056	0.622	0.469	0.974669	0.300175	0.0381065	74.18	34.93	25.94	776547	970140	834815	725552	953623	541158	387779	129790	889168	338996	826796	822849	440664	439945	541158	330978	72275.5	799980	1
High	Master Protein	B4DLR8	NAD(P)H dehydrogenase [quinone] 1 [OS=Homo sapiens]	0	33.93	25	5	62	5	202	22.8	8.5	449	55.9	5	5	Pf02525	1728	ENSG00000181019.12	NQO1	0.556	0.88	1.796	0.000797627	0.747357	4.96088e-05	13.83	32.2	40.7	6.97904e+06	1.02844e+07	1.4089e+07	5.55332e+06	4.97846e+06	7.02319e+06	9.79509e+06	9.76945e+06	7.84102e+06	3.04665e+06	8.76483e+06	1.38871e+07	3.37281e+06	2.29677e+06	7.02319e+06	8.36034e+06	5.44026e+06	7.05453e+06	1
High	Master Protein	B4DLV7	Rab GDP dissociation inhibitor [OS=Homo sapiens]	0	473.575	77	37	650	26	449	51.1	8.18	8507	847.74	36	37	Pf00996	2665		GDI2	0.766	0.67	0.901	0.0707833	0.500315	0.523051	24.03	39.83	66.02	1.32595e+08	1.6986e+08	2.11514e+08	1.27756e+08	1.22376e+08	1.53503e+08	1.41205e+08	8.68777e+06	1.7473e+08	5.78836e+07	1.44763e+08	2.08482e+08	7.75924e+07	5.64572e+07	1.53503e+08	1.20522e+08	4.83791e+06	1.57204e+08	1
High	Master Protein	B4DM05	cDNA FLJ51241, highly similar to Nidogen-1 [OS=Homo sapiens]	0	166.058	32	13	140	1	726	79.3	4.97	1125	193.4	13	13	Pf00008, Pf06119, Pf07474, Pf07645, Pf12662, Pf12947, Pf14670	4811		NID1	1.68	1.028	0.612	0.0713658	0.821115	0.154228	37.69	30.79	18.93	877589	782202	320049	1.09969e+06	1.05449e+06	1474593	902484	260780	858020	383105	666627	315461	667895	486479	1474593	770292	145219	771956	1	Oxidation [P684; P697]
High	Master Protein	B4DM13	cDNA FLJ52932, highly similar to Homo sapiens cell division cycle associated 7 (CDCA7), transcript variant 2, mRNA [OS=Homo sapiens]	0.002	2.626	3	1	2	1	298	34.2	9.11	16	0	1	1	Pf10497	83879		CDCA7		100	100		1e-17	1e-17											222268									123773		1
High	Master Protein	B4DM33	cDNA FLJ52068, highly similar to Microtubule-associated protein RP/EB family member 1 [OS=Homo sapiens]	0	141.001	66	14	149	14	238	26.6	5.29	2002	224.56	14	14	Pf00307, Pf03271	22919		MAPRE1	0.921	0.859	0.885	0.600919	0.872092	0.597019	48.87	61.22	70.67	1.64274e+07	2.47069e+07	2.84899e+07	2.34596e+07	1.7017e+07	2.76241e+07	2.03202e+07	584294	3.89195e+07	7.17127e+06	2.10563e+07	2.80815e+07	1.42482e+07	7.85062e+06	2.76241e+07	1.73438e+07	325373	3.50156e+07	1
High	Master Protein	B4DMA8	Kinesin-like protein [OS=Homo sapiens]	0	21.267	11	4	9	4	549	60.5	6.7	137	7.33	4	3	Pf00225	3833		KIFC1	0.621	0.528	0.753	0.0842774	0.18655	0.478901	10.45	10.74	28.2	719246	693618	947341	468417	386431	120017	318348	358428	607110	313982	591132	933761	284493	178276	120017	271717	199596	546214	1
High	Master Protein	B4DMD3	cDNA FLJ58174, highly similar to WW domain-binding protein 11 [OS=Homo sapiens]	0	69.057	18	8	141	8	589	64.9	7.01	1696	173.93	8	8	Pf09429	51729		WBP11	1.029	0.917	0.9	0.835968	0.637744	0.581081	22.7	60.24	63.59	8.69273e+06	8.59562e+06	9.10937e+06	9.70709e+06	8.67624e+06	8.73157e+06	8.70813e+06	2.61034e+06	1.13865e+07	3.79475e+06	7.32557e+06	8.97879e+06	5.8956e+06	4.0027e+06	8.73157e+06	7.43259e+06	1.4536e+06	1.02444e+07	1
High	Master Protein	B4DMM7	cDNA FLJ59722, highly similar to Retinoblastoma-binding protein 5 [OS=Homo sapiens]	0	23.532	12	5	32	5	573	63.3	5.2	233	17.43	5	5	Pf00400	5929		RBBP5	1.164	0.815	0.738	0.481607	0.8066	0.409764	31.48	32.16	22.72	1.9495e+06	2.1389e+06	2.71025e+06	2.7342e+06	2.41865e+06	2.16715e+06	2.15394e+06	772791	1.99406e+06	851041	1.82287e+06	2.6714e+06	1.66062e+06	1.11582e+06	2.16715e+06	1.83844e+06	430340	1.79404e+06	1
High	Master Protein	B4DMP6	cDNA FLJ51507, highly similar to Histone-lysine N-methyltransferase, H3lysine-9 specific 1 [OS=Homo sapiens]	0	4.657	5	1	2	1	217	24.6	9.38	47	1.93	1	1	Pf05033	6839		SUV39H1		100	100		1e-17	1e-17											426675									237600		1
High	Master Protein	B4DMR3	cDNA FLJ51896, highly similar to Glia-derived nexin [OS=Homo sapiens]	0	28.449	15	5	30	5	334	37.1	9.52	169	22.84	5	5	Pf00079	5270		SERPINE2	0.951	0.742	0.791	0.667556	0.644883	0.641477	48.97	25.64	22.36	4.42098e+06	4.74255e+06	2.09647e+06	3.99508e+06	3.68686e+06	3.51031e+06	3.20383e+06	2.53307e+06	5.32627e+06	1.92995e+06	4.04181e+06	2.06642e+06	2.42641e+06	1.7009e+06	3.51031e+06	2.73454e+06	1.41058e+06	4.79201e+06	1
High	Master Protein	B4DMS5	cDNA FLJ57399, highly similar to HIV-1 Rev-binding protein 2 [OS=Homo sapiens]	0	12.041	14	3	6	3	177	20.2	8.79	81	2.39	3	3		11103		KRR1	0.954	1.305	0.994	0.769782	0.508263	0.905451	18.07	69.09	28.05	335651	383133	418719	413234	382374	365349	372782	1.08623e+06	266542	146526	326523	412717	250977	176404	365349	318178	604883	239806	1
High	Master Protein	B4DMU4	cDNA FLJ59935, highly similar to Protein FAM45A [OS=Homo sapiens]	0.001	3.879	4	1	10	1	206	23.3	5.55	75	7.85	1	1	Pf08616, Pf09794	404636		FAM45A	0.92	1.662	2.047	0.714497	0.150242	0.0111525	32.82	128.03	95.35		552949	578153	520053	655987	321226	2.08319e+06	423814			471248	569866	315854	302634	321226	1.77805e+06	236007		1
High	Master Protein	B4DMV0	cDNA FLJ59352, highly similar to Brain-specific angiogenesis inhibitor1-associated protein 2 [OS=Homo sapiens]	0	19.183	13	5	19	5	500	54.8	9.17	59	7.06	4	5	Pf00018, Pf07653, Pf08397, Pf14604	10458		BAIAP2	1.37	0.946	0.841	0.15387	0.862985	0.839698	27.23	58.44	34.81	1.32136e+06	1.41596e+06	1.20998e+06	1.68183e+06	1.76983e+06	1.35467e+06	1.74557e+06	303505	1.28554e+06	576829	1.20675e+06	1.19264e+06	1.02146e+06	816495	1.35467e+06	1.48988e+06	169011	1.15659e+06	1
High	Master Protein	B4DN28	cDNA FLJ54639, highly similar to Integrin alpha-8 [OS=Homo sapiens]	0	13.958	5	4	9	4	1048	115.9	5.68	53	2.18	4	4	Pf00357, Pf01839, Pf08441, Pf13517	8516		ITGA8	0.481	0.406	1.118	0.00244928	0.0369303	0.676591	14.35	13.4	101.75	2.62776e+06	1.60565e+06	977030	696085	579011	267325	59370.3		527056	1.14713e+06	1.36841e+06	963025	422767	267122	267325	50674		474190	1
High	Master Protein	B4DN31	cDNA FLJ55809 [OS=Homo sapiens]	0	108.506	24	9	70	1	454	51	8.87	1120	103.88	9	9	Pf00704	66005		CHID1	1.103	0.73	0.724	0.550505	0.734338	0.464692	37.79	47.85	45.26	8.12524e+06	8.77921e+06	7.2258e+06	8.46135e+06	8.47702e+06	7.82257e+06	8.55364e+06	1.52374e+06	7.16142e+06	3.54701e+06	7.48203e+06	7122222	5.139e+06	3.91079e+06	7.82257e+06	7.30073e+06	848514	6.44309e+06	1
High	Master Protein	B4DN54	cDNA FLJ55111, highly similar to Sorting and assembly machinery component 50 homolog [OS=Homo sapiens]	0	39.555	19	4	42	1	259	28.5	8.54	575	52.5	4	4	Pf01103	25813		SAMM50	0.765	0.659	0.862	0.245402	0.393376	0.918943	31.04	17.16	29.06	1.56948e+06	1.52066e+06	898881	1.16272e+06	1.57916e+06	462500	1.00243e+06	1.17736e+06	434684	685145	1.29597e+06	885996	706181	728533	462500	855596	655630	391083	1
High	Master Protein	B4DN85	E3 ubiquitin-protein ligase [OS=Homo sapiens]	0	31.797	8	5	14	5	814	93.2	5.87	111	13.25	5	5	Pf00168, Pf00397, Pf00632	83737		ITCH	1.409	1.187	0.869	0.196961	0.461982	0.985509	27.55	57.53	44.37	1.12392e+06	944680	1.0183e+06	1.18237e+06	1.29339e+06	1.17778e+06	1.4233e+06	384429	1.42529e+06	490640	805098	1.0037e+06	718114	596695	1.17778e+06	1.21482e+06	214074	1.28232e+06	1
High	Master Protein	B4DNC0	cDNA FLJ61141, highly similar to Ras-related protein Rab-34 [OS=Homo sapiens]	0	27.665	15	3	30	3	274	30.6	8.37	795	32.85	3	3	Pf00025, Pf00071, Pf01926, Pf04670, Pf08477	83871		RAB34	0.829	0.8	0.943	0.364375	0.775207	0.777633	19.08	18.11	25.36	2.01979e+06	1.85141e+06	1.6494e+06	1.59459e+06	1.55568e+06	763134	1.75458e+06	1.40118e+06	752742	881726	1.57785e+06	1.62576e+06	968475	717700	763134	1.49757e+06	780269	677238	1
High	Master Protein	B4DND2	cDNA FLJ54643, highly similar to Homo sapiens SET domain and mariner transposase fusion gene (SETMAR), mRNA [OS=Homo sapiens]	0	30.27	12	4	44	4	428	49.6	8.32	509	42.07	4	4	Pf01359, Pf01498, Pf12802, Pf12840, Pf13358, Pf13551, Pf13565	6419		SETMAR	0.858	0.8	0.966	0.433285	0.7634	0.701691	19.4	33.61	44.26	1.90549e+06	2.06744e+06	2.51488e+06	1.96088e+06	1.8323e+06	1.67324e+06	1.8877e+06	910666	2.16243e+06	831830	1.76196e+06	2.47883e+06	1.19094e+06	845316	1.67324e+06	1.61119e+06	507117	1.94553e+06	1
High	Master Protein	B4DNG0	Olfactomedin-like protein 3 [OS=Homo sapiens]	0	21.948	23	5	14	5	345	39	6.11	103	3.95	5	5	Pf02191	56944	ENSG00000116774.11	OLFML3	1.647	2.982	1.911	0.199944	0.0168407	0.0532885	77.57	81.92	107.14	39790.6	588926	181145	192904	211428	1.32346e+06	481527	2.6805e+06	471228	17370.3	501909	178549	117160	97540.3	1.32346e+06	410995	1.49267e+06	423961	1
High	Master Protein	B4DNH1	Profilin [OS=Homo sapiens]	0	102.217	36	11	264	4	188	20.8	7.83	4000	293.92	11	11	Pf00235	5217		PFN2	0.978	0.864	0.974	0.777263	0.856368	0.268911	44.89	41.54	59.86	2.51733e+07	3.23865e+07	4.21078e+07	2.89791e+07	2.49881e+07	4.49156e+07	3.32244e+07	1.88802e+07	4.17365e+07	1.09892e+07	2.76012e+07	4.15042e+07	1.76005e+07	1.1528e+07	4.49156e+07	2.83578e+07	1.05137e+07	3.75501e+07	1
High	Master Protein	B4DNH5	cDNA FLJ59039, highly similar to Homo sapiens zinc finger protein 121 (ZNF121), mRNA [OS=Homo sapiens]	0	10.394	6	2	4	2	343	39.1	7.59	42	0	2	2	Pf00096, Pf13465	7675		ZNF121	1.067	2.697	2.483	0.95524	0.035983	0.00772855	23.5	76.09	70.69	140436	146100	63583.6	191214	199692	45712.5		644048	213340	61306.6	124513	62672.2	116134	92125.9	45712.5		358647	191941	1
High	Master Protein	B4DNR3	cDNA FLJ52710, highly similar to Abhydrolase domain-containing protein 14B [OS=Homo sapiens]	0	25.554	24	3	8	3	185	19.8	6.4	120	12.93	3	3	Pf00561, Pf12146, Pf12695, Pf12697	84836		ABHD14B	1.625	2.164	1.014	0.0969471	0.0205573	0.497276	68.02	114.67	111.46	437399	678545	739791	748397	713915	2.6173e+06	3.25642e+06	243563	1.46443e+06	190943	578286	729187	454539	329358	2.6173e+06	2.77943e+06	135631	1.31754e+06	1
High	Master Protein	B4DNU0	General transcription factor IIH subunit 4 [OS=Homo sapiens]	0	7.227	3	1	4	1	386	43.3	8.76	122	4.83	1	1	Pf03849, Pf13625	2968		GTF2H4	1.111	0.7	0.657	0.875311	0.503991	0.311668	35.04	6.61	12.16	222634	225029	270049	249946	309018	187861		172005	156614	97189.3	191780	266178	151805	142562	187861		95783.3	140905	1
High	Master Protein	B4DP04	cDNA FLJ55732, highly similar to Homo sapiens DnaJ (Hsp40) homolog, subfamily C, member 10 (DNAJC10), mRNA [OS=Homo sapiens]	0	87.91	25	11	102	1	557	64	8.05	1029	114.26	11	10	Pf00085, Pf13098, Pf13848, Pf13905	54431		DNAJC10	0.859	0.692	0.76	0.549093	0.472123	0.543939	6.68	20.17	26.82	531329	563747	531024	484342	483731	327847	472153	171216	367736	231948	480450	523412	294165	223165	327847	402994	95344.3	330851	1
High	Master Protein	B4DP22	carboxypeptidase [OS=Homo sapiens]	0	16.886	6	2	19	2	402	45.1	5.96	493	31.46	2	2	Pf00450	59342		SCPEP1	0.741	0.663	0.668	0.0937602	0.500118	0.176833	12.01	36.72	33.03	4.58643e+06	5.54124e+06	5.96863e+06	3.49981e+06	4.25121e+06	5.04066e+06	5.54125e+06	1.43906e+06	3.08021e+06	2.00217e+06	4.72249e+06	5883071	2.12561e+06	1.96126e+06	5.04066e+06	4.72959e+06	801363	2771254	1
High	Master Protein	B4DP27	cDNA FLJ52153, highly similar to Transmembrane emp24 domain-containing protein 2 [OS=Homo sapiens]	0	30.734	20	3	93	3	169	19.2	5.86	873	34.38	3	3	Pf01105	10959		TMED2	1.188	0.56	0.576	0.404814	0.192633	0.059195	114.88	26.99	33.7	3.61557e+06	3.31025e+06	2.34139e+06	3.94771e+06	6.23501e+06	848549	3.62205e+06	913767	487834	1.57835e+06	2.82114e+06	2.30783e+06	2.39764e+06	2.87646e+06	848549	3.0915e+06	508844	438902	1
High	Master Protein	B4DP77	cDNA FLJ57413, highly similar to Mitochondrial 28S ribosomal protein S10 [OS=Homo sapiens]	0	12.748	12	1	4	1	160	18.7	6.43	88	6.84	1	1	Pf00338	55173		MRPS10	0.894	0.712	0.785	0.600754	0.513574	0.595837	24.95	29.7	25.07	149360	277294	247126	202704	161596	247783	247875	106286	159118	65202.2	236322	243584	123112	74551	247783	211568	59186.8	143158	1
High	Master Protein	B4DP80	NAD(P)H-hydrate epimerase [OS=Homo sapiens]	0	85.92	32	9	121	9	307	33.6	8.73	1122	107.27	9	9	Pf03853	128240		APOA1BP; NAXE	0.99	1.322	1.258	0.980286	0.110528	0.0175286	54.52	70.53	83.22	6.43622e+06	9.16085e+06	1.00341e+07	6.978e+06	8.14282e+06	2.01075e+07	1.39579e+07	185038	1.45796e+07	2.80968e+06	7.80728e+06	9.89024e+06	4.23809e+06	3.75661e+06	2.01075e+07	1.19134e+07	103041	1.31172e+07	1	Oxidation [P136]
High	Master Protein	B4DP84	DCN1-like protein [OS=Homo sapiens]	0	16.437	26	4	18	3	168	20	4.88	133	6.2	4	4	Pf03556	84259		DCUN1D5	0.877	1.044	1.262	0.497315	0.691851	0.143575	40.35	41.73	56.12	907374	1.30888e+06	1.6487e+06	980424	942039	1.32199e+06	1.08178e+06	1.5165e+06	1.29994e+06	396108	1.11549e+06	1.62507e+06	595460	434601	1.32199e+06	923326	844482	1.16955e+06	1
High	Master Protein	B4DPB7	elongator complex protein 3 [OS=Homo sapiens]	0	26.643	14	6	20	6	455	52.1	8.02	189	15.74	6	6	Pf04055	55140		ELP3	1.075	0.899	0.81	0.75237	0.982064	0.735044	40.56	38.99	34.03	1.47905e+06	2.10313e+06	2.37014e+06	1.61413e+06	1.6746e+06	3.07302e+06	1.94199e+06	1.02448e+06	2.87972e+06	645669	1.79238e+06	2.33617e+06	980341	772562	3.07302e+06	1.65754e+06	570499	2.59087e+06	1
High	Master Protein	B4DPC1	cDNA FLJ51920, highly similar to TATA-box-binding protein [OS=Homo sapiens]	0	4.501	3	1	14	1	316	34.7	9.79	67	7.91	1	1	Pf00352	6908		TBP	0.802	0.757	0.77	0.390568	0.597627	0.54269	21.27	54.8	37.6	426605	442141	681354	333967	559385		334895	554134	114936	186232	376812	671587	202835	258067		285841	308578	103407	1
High	Master Protein	B4DPG3	cDNA FLJ56924, highly similar to WW domain-containing oxidoreductase [OS=Homo sapiens]	0	16.048	7	2	4	2	301	33.5	8.47	51	3.3	2	2	Pf00106, Pf04009, Pf08659, Pf13460, Pf13561	51741		WWOX	0.675	0.486	0.734	0.156369	0.137942	0.433006	16.17	13.7	29.23	891669	706107	457502	466786	576601	193208	459469	193755	212899	389252	601775	450944	283502	266009	193208	392168	107895	191544	1
High	Master Protein	B4DPH5	cDNA FLJ55496, highly similar to Aminopeptidase N [OS=Homo sapiens]	0.01	1.676	1	1	2	1	533	61.4	5.33	20	0	1	1	Pf01433, Pf11838	290		ANPEP	0.01	5.736	100	1e-17	0.000559669	1e-17		2.4			30077.7	31067.8				175348				25633.5	30622.5				149664			1
High	Master Protein	B4DPK2	cDNA FLJ59729, highly similar to DnaJ homolog subfamily C member 11 [OS=Homo sapiens]	0	38.788	14	8	50	8	521	58.8	8.97	511	29.27	8	8	Pf00226, Pf11875	55735		DNAJC11	0.927	0.721	0.916	0.6255	0.617039	0.804393	55.86	29.31	53.92	6.91961e+06	5.27108e+06	3.23248e+06	5.00135e+06	6.5266e+06	1.36317e+06	3.99209e+06	4.57107e+06	2.07977e+06	3.02071e+06	4.49225e+06	3.18615e+06	3.03757e+06	3.01099e+06	1.36317e+06	3.40734e+06	2.54546e+06	1.87116e+06	1
Medium	Master Protein	B4DQ37	cDNA FLJ56223, highly similar to Sorting nexin-17 [OS=Homo sapiens]	0.021	1.021	4	1	2	1	450	50.8	8.03	0	0	1	1	Pf00787	9784		SNX17	1.029	1.006	1.073	0.8939	0.995335	0.853347	24.95	40.99	40.99	133131	114376	167354	117691	124831	201187	231357	133986	96944.7	58117.4	97476.2	164955	71479.4	57589.4	201187	197468	74611.8	87220.7	1
High	Master Protein	B4DQB0	cDNA FLJ61335, highly similar to Homo sapiens AT rich interactive domain 3B (BRIGHT- like) (ARID3B), mRNA [OS=Homo sapiens]	0	10.758	7	3	14	2	470	51.6	7.47	60	12.32	3	3	Pf01388	10620		ARID3B	0.796	0.566	0.772	0.260316	0.213983	0.632381	13.08	10.28	30.62	1.73752e+06	1.75594e+06	2.13498e+06	1.51696e+06	1.38165e+06	1.7573e+06	1.11251e+06	673430	2.58948e+06	758502	1.49649e+06	2.10438e+06	921324	637412	1.7573e+06	949554	375009	2.32974e+06	1
High	Master Protein	B4DQE4	cDNA FLJ51763, highly similar to Orphan nuclear receptor EAR-2 [OS=Homo sapiens]	0	25.249	16	5	33	3	377	40.4	8.24	189	24.46	5	5	Pf00104, Pf00105	2063		NR2F6	0.898	0.531	0.742	0.617263	0.161607	0.499316	40.2	18.26	33.28	1.21875e+06	1.78635e+06	1.36979e+06	1.53463e+06	1.53045e+06	219555	1.26288e+06	1.51018e+06	457922	532035	1.5224e+06	1.35016e+06	932056	706061	219555	1.0779e+06	840963	411990	1
High	Master Protein	B4DQG4	cDNA FLJ55138, highly similar to Ras-related GTP-binding protein C [OS=Homo sapiens]	0	16.343	8	4	33	4	365	40.2	5.07	146	11.51	4	4	Pf04670	64121		RRAGC	0.945	0.731	0.808	0.73837	0.60757	0.751543	29.02	26.43	25.07	1.68784e+06	1.85374e+06	1.64735e+06	1.59646e+06	1.79248e+06	1.847e+06	2.01525e+06	902498	1.57028e+06	736814	1.57984e+06	1.62373e+06	969612	826945	1.847e+06	1.72006e+06	502569	1.41277e+06	1
High	Master Protein	B4DQQ6	cDNA FLJ56227, highly similar to Homo sapiens diacylglycerol lipase beta [OS=Homo sapiens]	0	4.327	2	1	6	1	486	53.4	6.38	17	0	1	1	Pf01764	221955		DAGLB	1.134	0.96	0.86	0.893947	0.962943	0.761855	6.94	43.05	35.17	164686	188706	161493	183146	191718	207068	119875		234081	71892.3	160824	159178	111233	88447.4	207068	102316		210601	1
High	Master Protein	B4DQW6	cDNA FLJ52984, highly similar to Homo sapiens mesoderm specific transcript homolog (MEST), transcript variant 1, mRNA [OS=Homo sapiens]	0	57.89	20	5	78	5	321	37	9.7	807	118.24	5	5	Pf00561, Pf06342, Pf12695, Pf12697	4232		MEST	0.504	0.421	1.227	7.73184e-05	0.0303993	0.0577265	14.1	12.85	86.56	1.68816e+07	1.46582e+07	1.17474e+07	8.37498e+06	9.32466e+06	4.19907e+06	4.99369e+06	1.86626e+07	4.12326e+06	7.36953e+06	1.24923e+07	1.1579e+07	5.08655e+06	4.30184e+06	4.19907e+06	4.26223e+06	1.03925e+07	3.70968e+06	1
High	Master Protein	B4DQY7	cDNA FLJ51280, highly similar to TATA element modulatory factor [OS=Homo sapiens]	0	9.971	2	2	4	2	992	111.7	4.87	24	2.05	2	2	Pf12325, Pf12329	7110		TMF1	1.643	1.172	0.713	0.0838757	0.655303	0.426469	21.36	28.39	26.69	368947	298310	242408	458727	523542	462932	468682		574236	161061	254233	238933	278608	241531	462932	400031		516637	1
High	Master Protein	B4DQZ5	cDNA FLJ51634, highly similar to Integrator complex subunit 2 [OS=Homo sapiens]	0	15.2	2	1	14	1	1196	133.3	6.09	132	15.61	1	1	Pf14750	57508		INTS2	1.056	0.746	0.745	0.877029	0.575536	0.48208	13.3	35.02	34.91	372145	453508	408819	409486	393020	518007	434496	125164	305083	162457	386500	402959	248701	181316	518007	370852	69699.1	274482	1
High	Master Protein	B4DQZ7	cDNA FLJ50838, highly similar to Apoptotic chromatin condensation inducer in thenucleus [OS=Homo sapiens]	0	197.074	25	19	182	1	1096	122.5	5.66	2514	245.75	19	19	Pf02037, Pf13893	22985		ACIN1	0.761	0.647	0.846	0.268284	0.403822	0.700526	5.02	19.49	33.65	437425	415375	441521	334453	251312	335869	283045	488496	194172	190955	354001	435192	203130	115940	335869	241585	272026	174695	1
High	Master Protein	B4DR58	cDNA FLJ55354, highly similar to Intraflagellar transport 140 homolog [OS=Homo sapiens]	0	5.651	2	1	2	1	1149	130.6	5.81	25	0	1	1	Pf13608	9742		IFT140	1.059	0.911	0.786	0.906193	0.922362	0.553403	13.62	0.4	14.21		333363		387082	322205		303616	224987	304609		284107		235094	148646		259143	125287	274055	1
High	Master Protein	B4DR61	Protein transport protein Sec61 subunit alpha isoform 1 [OS=Homo sapiens]	0	98.719	23	11	189	6	482	52.9	8.24	1949	194.13	11	11	Pf00344, Pf10559	29927	ENSG00000058262.9	SEC61A1	0.977	0.455	0.65	0.777005	0.0479259	0.223979	51.49	21	49.8	6.32041e+07	6.24158e+07	4.33261e+07	5.53731e+07	6.70825e+07	1.97369e+07	5.08144e+07	9.39016e+06	3.68975e+07	2.75913e+07	5.31935e+07	4.2705e+07	3.36308e+07	3.09479e+07	1.97369e+07	4.33712e+07	5.22905e+06	3.31965e+07	1
High	Master Protein	B4DR67	cDNA FLJ56758, highly similar to Dolichyl-phosphate beta-glucosyltransferase [OS=Homo sapiens]	0	7.928	16	3	25	3	230	25.3	9.06	71	19.92	3	3	Pf00535, Pf10111, Pf13641	29880		ALG5	0.881	0.677	0.776	0.550278	0.454632	0.618524	22.36	30.74	33.92	2.34233e+06	1.62172e+06	1.24615e+06	1.62274e+06	1.72302e+06	1.42891e+06	1.63737e+06	464189	1.15696e+06	1.02253e+06	1.3821e+06	1.22829e+06	985569	794899	1.42891e+06	1.39754e+06	258490	1.04091e+06	1
High	Master Protein	B4DRA0	cDNA FLJ58459, highly similar to RNA-binding region-containing protein 2 [OS=Homo sapiens]	0	144.24	30	14	183	14	502	56.4	10.02	2442	205.88	14	14	Pf00076, Pf13893, Pf14259, Pf15519	9584		RBM39	1.235	0.945	0.771	0.304081	0.62913	0.763073	30.61	33.4	31.6	1.78681e+07	1.9479e+07	1.7929e+07	1.79557e+07	2.59769e+07	1.78675e+07	1.48575e+07	1.96451e+07	2.21491e+07	7.80018e+06	1.66009e+07	1.7672e+07	1.09054e+07	1.19842e+07	1.78675e+07	1.26812e+07	1.09397e+07	1.99274e+07	1	Oxidation [P298; K300]
High	Master Protein	B4DRA3	cDNA FLJ61345, highly similar to Probable G-protein coupled receptor 125 [OS=Homo sapiens]	0	8.885	2	2	4	2	1124	125.1	8.38	30	0	2	2	Pf00002, Pf01825, Pf02793, Pf07679	166647		GPR125; ADGRA3	0.01	4.948	100	1e-17	0.000882286	1e-17		0				80885.9					631219				79726.5					351503		1
High	Master Protein	B4DRB0	tetraspanin [OS=Homo sapiens]	0	62.481	22	5	69	5	201	22.9	8.16	708	92.18	5	5	Pf00335	7105		TSPAN6	1.075	0.179	0.207	0.649198	1.09397e-06	3.51719e-13	66.29	3.13	4.88	1.93408e+07	1.48513e+07	8.70234e+06	1.24692e+07	1.70862e+07	659925	5.8352e+06	694509	1.57146e+06	8.44309e+06	1.26569e+07	8.5776e+06	7.57319e+06	7.88258e+06	659925	4.98048e+06	386747	1.41383e+06	1
Medium	Master Protein	B4DRC7	cDNA FLJ57829 [OS=Homo sapiens]	0.019	1.067	1	1	2	1	793	90.9	5.83	0	0	1	1	Pf00515, Pf07719, Pf13281, Pf13371, Pf13414, Pf13424, Pf13432	55622		TTC27	0.469	0.834	1.682	0.0129972	0.741008	0.143838	4.19	14.54	23.54		231384	303799	135723	137356	112408	184704	264548	228300		197196	299445	82431.5	63368.1	112408	157649	147317	205400	1
High	Master Protein	B4DRJ1	cDNA FLJ55041, highly similar to 2-hydroxyphytanoyl-CoA lyase [OS=Homo sapiens]	0	11.386	8	2	4	2	400	44.4	8.34	43	2.32	1	2	Pf00205, Pf02552, Pf02775				1.169	1.219	1.031	0.631353	0.507541	0.605463	41.43	47.78	63.91	862462	643484	409826	826482	649216	1.22883e+06	900858	499441	1.16959e+06	376501	548405	403952	501964	299510	1.22883e+06	768904	278121	1.05228e+06	1
High	Master Protein	B4DRL5	cDNA FLJ60834, highly similar to Engulfment and cell motility protein 2 (CED-12 homolog A) [OS=Homo sapiens]	0	36.286	14	7	27	7	732	83.9	5.88	148	10.2	7	6	Pf04727, Pf11841	63916		ELMO2	0.964	1.144	1.074	0.836666	0.465674	0.412032	37.82	57.76	76.01	1.7198e+06	2.12908e+06	2.45968e+06	1.76084e+06	2.07795e+06	4.14905e+06	2.65866e+06	813062	3.23199e+06	750765	1.81449e+06	2.42443e+06	1.06945e+06	958643	4.14905e+06	2.26923e+06	452765	2.90781e+06	1
High	Master Protein	B4DRY5	cDNA FLJ54538, highly similar to Transportin-2 [OS=Homo sapiens]	0	31.073	8	5	50	2	880	99.6	4.98	604	51.69	5	5	Pf03810, Pf13513	30000		TNPO2	1.161	0.787	0.668	0.619212	0.664425	0.332987	21.32	18.83	11.35	438054	534199			479502	657889	507686	274941	380697	191230	455268			221214	657889	433322	153105	342512	1
High	Master Protein	B4DS66	MICOS complex subunit Mic60 [OS=Homo sapiens]	0	261.686	37	26	305	26	660	73.3	5.99	3587	357.86	26	26	Pf07227, Pf09731	10989		IMMT	0.958	0.641	0.675	0.684138	0.408487	0.289122	72.34	20.99	33.64	9.77203e+07	9.06599e+07	5.35874e+07	8.04308e+07	1.07151e+08	2.49689e+07	7.37163e+07	3.7505e+07	3.41765e+07	4.26591e+07	7.72643e+07	5.28192e+07	4.88497e+07	4.94331e+07	2.49689e+07	6.29186e+07	2.08852e+07	3.07484e+07	1
High	Master Protein	B4DSC2	Elongation of very long chain fatty acids protein [OS=Homo sapiens]	0	28.793	17	3	24	3	289	34.1	9.38	259	44.14	2	3	Pf01151	60481		ELOVL5	0.824	0.385	0.554	0.256923	0.0183898	0.0365997	62.83	8.29	26.62	3.79676e+06	4.33062e+06	3.89927e+06	4.20519e+06	4.39528e+06	886023	1.98569e+06	951310	1.25635e+06	1.65745e+06	3.69075e+06	3.84338e+06	2.55402e+06	2.02772e+06	886023	1.69483e+06	529750	1.13034e+06	1	Acetyl [N-Term]
High	Master Protein	B4DSL6	cDNA FLJ57190, highly similar to Actin-binding protein anillin [OS=Homo sapiens]	0.001	3.248	2	1	2	1	1001	110.8	7.46	18	2.32	1	1	Pf00169, Pf08174	54443		ANLN	0.01	1.496	100	1e-17	0.386048	1e-17		6.58		215185		235160					336531		93937.3		231789					187402		1
High	Master Protein	B4DSN3	cDNA FLJ60345, highly similar to Protein transport protein Sec24C [OS=Homo sapiens]	0	153.909	25	20	238	20	975	106.5	6.96	2175	216.94	20	20	Pf00626, Pf03154, Pf04503, Pf04652, Pf04810, Pf04811, Pf04815, Pf07223, Pf08033, Pf09770, Pf15258, Pf15279, Pf15449	9632		SEC24C	1.193	0.814	0.743	0.360333	0.982998	0.630829	28.68	60.14	46.71	1.36571e+07	1.76446e+07	1.71274e+07	1.77717e+07	2.04256e+07	1.88196e+07	2.35223e+07	3.57767e+06	1.70291e+07	5.96193e+06	1.50375e+07	1.68819e+07	1.07937e+07	9.42315e+06	1.88196e+07	2.00768e+07	1.99227e+06	1.5321e+07	1
High	Master Protein	B4DST5	cDNA FLJ58078, highly similar to Tyrosine-protein phosphatase non-receptortype 23 [OS=Homo sapiens]	0	16.789	3	4	20	4	1510	164.5	6.92	32	8.35	4	4	Pf00102, Pf03097, Pf05823, Pf13949	25930		PTPN23	1.047	1.18	0.987	0.863694	0.402962	0.603926	57.93	48.74	58.32	1.05214e+06	1.72163e+06	1.60491e+06	1.37709e+06	1.13624e+06	1.82216e+06	1.97388e+06	856302	2.29236e+06	459304	1.46725e+06	1.5819e+06	836376	524193	1.82216e+06	1.68475e+06	476844	2.06242e+06	1
High	Master Protein	B4DSU5	cDNA FLJ55583, highly similar to Polypyrimidine tract-binding protein 2 [OS=Homo sapiens]	0	89.354	26	10	102	9	540	58.6	8.92	1299	113.37	10	10	Pf00076, Pf13893, Pf14259	58155		PTBP2	0.81	0.369	0.495	0.227561	0.00862141	0.00702133	30.78	6.08	18.55	1.28382e+07	1.16469e+07	1.23958e+07	1.09537e+07	1.08524e+07	4.02464e+06	4.21226e+06	2.6993e+06	6.43759e+06	5.60442e+06	9.92601e+06	1.22181e+07	6.6527e+06	5.00663e+06	4.02464e+06	3.59526e+06	1.50314e+06	5.79187e+06	1
High	Master Protein	B4DSV8	cDNA FLJ54146, highly similar to Growth hormone-inducible transmembrane protein [OS=Homo sapiens]	0	31.643	16	5	68	5	332	35.8	9.85	755	65.12	5	5	Pf01027, Pf12811	27069		GHITM	1.026	0.446	0.51	0.857329	0.0618456	0.0111254	92.39	16.26	25.85	1.18159e+07	1.14214e+07	5.71705e+06	9.72679e+06	1.48963e+07	1.74419e+06	9.26124e+06	3.63009e+06	1.85372e+06	5.15815e+06	9.73379e+06	5.6351e+06	5.90756e+06	6.87226e+06	1.74419e+06	7.90469e+06	2.02147e+06	1.66778e+06	1
High	Master Protein	B4DSW6	Protein HIRA [OS=Homo sapiens]	0	9.976	6	3	11	1	806	88.1	8.31	42	1.79	3	3	Pf00400, Pf07569, Pf09453	7290		HIRA																												1	Oxidation [K337]
High	Master Protein	B4DSX2	cDNA FLJ60144, highly similar to Complement component C1q receptor [OS=Homo sapiens]	0	15.667	8	2	8	2	347	36.6	6.29	62	3.71	2	2	Pf00059, Pf14670	22918		CD93	100	100	1.002	1e-17	1e-17	0.83998			99.2				437899	484896	786183	1.80969e+06		273027				265958	223702	786183	1.54462e+06		245641	1
High	Master Protein	B4DT15	cDNA FLJ56150, highly similar to Zinc phosphodiesterase ELAC protein 2 [OS=Homo sapiens]	0	46.886	15	8	32	8	811	90.5	7.74	228	17.47	8	7	Pf00753, Pf12706, Pf13691	60528		ELAC2	0.804	0.712	0.846	0.191107	0.592311	0.831656	12.72	14.84	18.28	4.02436e+06	3.67814e+06	4.36436e+06	3.36802e+06	3.18534e+06	3.09289e+06	3.05263e+06	2.17952e+06	3.32466e+06	1.7568e+06	3.13467e+06	4.3018e+06	2.04557e+06	1.46953e+06	3.09289e+06	2.60549e+06	1.2137e+06	2.99118e+06	1
Medium	Master Protein	B4DT44	cDNA FLJ57001, highly similar to Homo sapiens B-cell novel protein 1 (BCNP1), mRNA [OS=Homo sapiens]	0.026	0.845	1	1	2	1	666	74.2	8.56	0	0	1	1		199786		FAM129C	1.014	0.44	0.433	0.980894	0.0900103	0.0228372	31.26	12.91	11.32	519748	541203	659389	475826	740975		419174	157944		226892	461237	649937	288993	341842		357775	87953.3		1
High	Master Protein	B4DT57	cDNA FLJ61383, highly similar to Serine/threonine-protein kinase 24 [OS=Homo sapiens]	0	76.508	22	9	85	4	450	50	5.6	1012	107.92	9	9	Pf00069, Pf06840, Pf07714				1.193	1.046	0.857	0.282328	0.385231	0.88819	38.96	46.37	38.48	6.14869e+06	7.6057e+06	7.62181e+06	7.43197e+06	6.97083e+06	1.12666e+07	8.12763e+06	3.78398e+06	9.54125e+06	2.68417e+06	6.48192e+06	7512553	4.51381e+06	3.21593e+06	1.12666e+07	6.93712e+06	2.10717e+06	8.58421e+06	1
High	Master Protein	B4DT65	cDNA FLJ58619, highly similar to YTH domain protein 1 [OS=Homo sapiens]	0	71.943	22	9	73	5	509	55.3	9.01	383	67.84	9	9	Pf04146	54915		YTHDF1	1.158	0.744	0.687	0.417927	0.696987	0.292028	30.28	30.6	25.16	4.21631e+06	4.13369e+06	3.84718e+06	5.34704e+06	4.77015e+06	3.69782e+06	3.22082e+06	1.76817e+06	2.88406e+06	1.8406e+06	3.52291e+06	3.79203e+06	3.24753e+06	2.20067e+06	3.69782e+06	2.74904e+06	984629	2.59477e+06	1
High	Master Protein	B4DT66	cDNA FLJ55367, highly similar to Rattus norvegicus SDA1 domain containing 1 (Sdad1), mRNA [OS=Homo sapiens]	0	18.324	6	5	28	5	650	75.5	9.22	86	8.25	5	5	Pf05285, Pf08158	55153		SDAD1	0.878	0.882	0.895	0.486356	0.980226	0.924163	37.1	62.45	41.22	2.31293e+06	1.71839e+06	2.71084e+06	1.80583e+06	1.76942e+06	2.35111e+06	1.5532e+06	1.26143e+06	2.72962e+06	1.00969e+06	1.46449e+06	2.67199e+06	1.09677e+06	816307	2.35111e+06	1.32569e+06	702443	2.45582e+06	1
High	Master Protein	B4DT77	Annexin [OS=Homo sapiens]	0	117.842	36	10	94	10	336	37.8	7.18	916	129.96	9	10	Pf00191	310		ANXA7	1.14	1.378	0.98	0.429819	0.0933406	0.282269	45.29	80.52	91.51	7.99757e+06	1.28873e+07	1.31256e+07	1.19404e+07	1.24649e+07	2.41189e+07	2.26989e+07	463257	1.63137e+07	3.49128e+06	1.09832e+07	1.29374e+07	7.25202e+06	5.75056e+06	2.41189e+07	1.93741e+07	257971	1.46774e+07	1
High	Master Protein	B4DTA9	cDNA FLJ59753 [OS=Homo sapiens]	0	73.049	19	6	51	1	429	48.1	6.44	492	74.98	6	6	Pf07534	57707		KIAA1609; TLDC1	0.657	0.01	0.01	0.128755	1e-17	1e-17	3.14			483815	683595	507496			333588				211206	582590	500222			333588				1
High	Master Protein	B4DTK7	cDNA FLJ61387, highly similar to Homo sapiens conserved nuclear protein NHN1 (NHN1), mRNA [OS=Homo sapiens]	0	43.176	10	7	59	7	977	108.9	8.44	273	32.64	7	7		124245		ZC3H18	1.019	1.101	1.12	0.963222	0.497515	0.244123	37.2	53.33	55.09	3.41035e+06	2.46124e+06	3.379e+06	3.51929e+06	2.64332e+06	5.12159e+06	2.71327e+06	4.72794e+06	4.78615e+06	1.48877e+06	2.09758e+06	3.33056e+06	2.13744e+06	1.21947e+06	5.12159e+06	2.31584e+06	2.63282e+06	4.30608e+06	1
High	Master Protein	B4DTN5	cDNA FLJ54810, highly similar to Homo sapiens polycomb group ring finger 3 (PCGF3), mRNA [OS=Homo sapiens]	0.001	3.324	4	1	8	1	324	36.9	8.69	72	0	1	1	Pf00097, Pf12678, Pf13639, Pf13923, Pf15227	10336		PCGF3	1.017	1.012	1.059	0.851018	0.985722	0.883056	49.14	45.01	32.27	69751.1	142935	137886	145351	97173.7	89677.4	142018		98884.9	30449.3	121815	135909	88279	44830.2	89677.4	121215		88966.2	1
High	Master Protein	B4DTS3	cDNA FLJ50213, highly similar to Calpain-6 (Calpamodulin) [OS=Homo sapiens]	0	6	4	2	6	2	386	45	8.75	39	3.36	2	2	Pf00168, Pf00648, Pf01067	827		CAPN6	0.459	0.611	1.222	0.00446087	0.315294	0.502782	5.05	10.78	9.2	1.02879e+06	250403	678388		224760	211633	273380	562278	235154	449110	213405	668664		103691	211633	233336	313112	211567	1
High	Master Protein	B4DTU7	10-formyltetrahydrofolate dehydrogenase [OS=Homo sapiens]	0	17.607	3	2	4	1	923	101.7	6.52	77	6.19	2	2	Pf00171, Pf00550, Pf00551, Pf02911	160428		ALDH1L2		100	100		1e-17	1e-17										742843									634034			1
High	Master Protein	B4DU33	cDNA FLJ58110, highly similar to Homo sapiens glycine-N-acyltransferase-like 1 (GLYATL1), mRNA [OS=Homo sapiens]	0	11.175	13	2	6	2	279	32.3	7.43	65	2.21	2	2	Pf06021, Pf08444, Pf13673	92292		GLYATL1	1.664	2.247	2.685	0.169816	0.0712156	0.00307505	36.82	102.41	97.78	201268	161231	116368	365043	481891	465768	1.43175e+06		152221	87861.9	137408	114700	221709	222316	465768	1.22203e+06		136953	1
High	Master Protein	B4DU42	cDNA FLJ56153, highly similar to Homo sapiens transforming growth factor beta regulator 4 (TBRG4), transcript variant 1, mRNA [OS=Homo sapiens]	0	26.774	8	3	28	3	642	71.8	7.3	222	36.66	3	3	Pf06743, Pf08368, Pf08373	9238		TBRG4	0.777	0.752	0.89	0.241685	0.637473	0.965991	37.89	25.6	41.47	988327	1.96514e+06	1.16408e+06	1.36313e+06	1.12138e+06	866568	1.47586e+06	931019	724355	431447	1.67478e+06	1.1474e+06	827899	517340	866568	1.25968e+06	518451	651698	1
High	Master Protein	B4DUL2	cDNA FLJ57152, highly similar to Replication protein A 32 kDa subunit [OS=Homo sapiens]	0	61.015	39	5	25	5	174	19.1	5.73	134	43.3	5	5	Pf08784, Pf12802	6118		RPA2	1.787	1.388	0.891	0.00132764	0.122166	0.822245	58.2	83.78	52.96	3.67325e+06	4.19469e+06	6.34311e+06	6.62423e+06	4.93169e+06	8.58854e+06	4.36338e+06	419834	9.66941e+06	1.60353e+06	3.5749e+06	6.25218e+06	4.02323e+06	2.27519e+06	8.58854e+06	3.72424e+06	233790	8.69952e+06	1
High	Master Protein	B4DUQ1	cDNA FLJ54552, highly similar to Heterogeneous nuclear ribonucleoprotein K [OS=Homo sapiens]	0	539.938	70	36	1611	3	439	48.5	5.92	23535	2205.65	34	36	Pf00013, Pf08067, Pf13014, Pf13083	3190		HNRNPK	0.945	0.785	0.893	0.621338	0.887709	0.556658	47.14	33.68	52.94	6.33561e+08	6.48605e+08	6.42286e+08	6.32861e+08	6.10585e+08	5.00817e+08	5.70084e+08	4.24259e+08	5.63904e+08	2.76577e+08	5.5277e+08	6.3308e+08	3.84368e+08	2.81688e+08	5.00817e+08	4.8658e+08	2.36255e+08	5.07341e+08	1	Oxidation [P362]; Acetyl [N-Term]
High	Master Protein	B4DUS0	BRCA2 and CDKN1A-interacting protein [OS=Homo sapiens]	0	37.396	21	5	34	5	290	33	4.61	577	45.1	5	5	Pf13862	56647		BCCIP	0.862	0.945	1.085	0.352473	0.795997	0.370252	27.45	43.19	55.27	1.72793e+06	3.42466e+06	3.47618e+06	2.43085e+06	2.43945e+06	2.05583e+06	2.50763e+06	4.37727e+06	1.77848e+06	754316	2.91865e+06	3.42635e+06	1.47638e+06	1.12542e+06	2.05583e+06	2.14032e+06	2.43754e+06	1.60009e+06	1
High	Master Protein	B4DUV1	Fibulin-1 [OS=Homo sapiens]	0	155.863	32	16	141	5	641	70.1	5.26	1594	154.97	15	16	Pf07645, Pf12662, Pf14670	2192		FBLN1	0.86	0.671	0.904	0.415529	0.515695	0.54357	33.07	32.61	45.94	2.12418e+07	1.68742e+07	1.74916e+07	1.69117e+07	1.363e+07	2.2092e+07	1.65673e+07	8.00613e+06	2.2792e+07	9.27296e+06	1.43809e+07	1.72409e+07	1.02713e+07	6.28808e+06	2.2092e+07	1.41406e+07	4.45833e+06	2.05058e+07	1
Medium	Master Protein	B4DUV5	cDNA FLJ59436 [OS=Homo sapiens]	0.017	1.154	8	1	1	1	364	41.3	9.77	0		1			25871		C3orf17; NEPRO	100		0.01	1e-17		1e-17							748450		544170							454571		544170				1	Oxidation [K50; P51; P63]
High	Master Protein	B4DV16	cDNA FLJ54503, highly similar to Acyl-coenzyme A thioesterase 1 [OS=Homo sapiens]	0	39.053	14	5	48	5	421	46.2	7.77	533	25.21	5	4	Pf04775, Pf08840	641371		ACOT1	1.104	1.237	0.909	0.57656	0.176636	0.710693	38.84	81.91	75.73	6.44085e+06	4.8046e+06	4.48888e+06	4.9445e+06	5.33474e+06	7.06101e+06	8.94569e+06	830356	5.82738e+06	2.81171e+06	4.09469e+06	4.42454e+06	3.00304e+06	2.46113e+06	7.06101e+06	7.63536e+06	462395	5.24287e+06	1
High	Master Protein	B4DV28	cDNA FLJ54170, highly similar to Cytosolic nonspecific dipeptidase [OS=Homo sapiens]	0	277.14	60	23	309	23	463	51.5	6.43	3587	409.28	23	23	Pf01546, Pf07687	55748		CNDP2	1.373	1.791	1.08	0.0763118	0.00843524	0.0881758	52.01	106.39	124.31	2.3228e+07	3.6538e+07	4.36156e+07	3.91988e+07	3.37026e+07	7.90945e+07	8.81317e+07	3.68064e+06	6.03892e+07	1.014e+07	3.11393e+07	4.29904e+07	2.38074e+07	1.55484e+07	7.90945e+07	7.52224e+07	2.04962e+06	5.43318e+07	1
Medium	Master Protein	B4DV69	cDNA FLJ55312, highly similar to Homo sapiens neuronal guanine nucleotide exchange factor (NGEF), mRNA [OS=Homo sapiens]	0.018	1.107	2	1	1	1	600	69.8	5.39	0		1		Pf00018, Pf00169, Pf00621, Pf07653, Pf14604	25791		NGEF																												1
High	Master Protein	B4DV85	cDNA FLJ53211, highly similar to A-Raf proto-oncogene serine/threonine-protein kinase [OS=Homo sapiens]	0	8.959	7	3	15	1	472	52.2	9.41	0	0	3	3	Pf00069, Pf07714, Pf14531	369		ARAF	0.909	0.951	1.115	0.59328	0.725689	0.262932	48.32	38.18	47.25	9.45688e+06	5.42954e+06	4.14383e+06	5.26204e+06	5.4875e+06	2.19108e+06	2.91517e+06	7.25196e+06	2.4189e+06	4.12833e+06	4.6273e+06	4.08443e+06	3.1959e+06	2.53161e+06	2.19108e+06	2.48816e+06	4.03836e+06	2.17627e+06	1
High	Master Protein	B4DV94	cDNA FLJ58285, highly similar to Homo sapiens pre-B-cell leukemia transcription factor interacting protein 1 (PBXIP1), mRNA [OS=Homo sapiens]	0	5.346	2	1	2	1	507	57.6	6.76	49	2.4	1	1		57326		PBXIP1	100	100	0.876	1e-17	1e-17	0.825883			74.9					590495	591311	886344	177194	517825					272419	591311	756515	98673.1	465884	1
High	Master Protein	B4DVB3	cDNA FLJ52207, highly similar to HLA class I histocompatibility antigen, B-7 alpha chain [OS=Homo sapiens]	0	4.871	11	1	8	1	198	22.8	6.11	25	2.17	1	1	Pf00129	3106		HLA-B	0.01	0.723	100	1e-17	0.535039	1e-17		25.86			554469					556230		288576		472543					474756		259631	1
High	Master Protein	B4DVP2	cDNA FLJ57208, highly similar to 5'-AMP-activated protein kinase subunit beta-1 [OS=Homo sapiens]	0.002	2.843	5	1	2	1	233	26.4	5.73	0	0	1	1	Pf02922, Pf04739	5564		PRKAB1	2.025	0.701	0.33	0.0826725	0.479667	0.00699078	28.62	43.35	10.07	115099	83111.9	128103	185326	259462	188115	143349	36534.2		50245.5	70831.6	126266	112557	119700	188115	122352	20344.6		1
High	Master Protein	B4DVQ5	Eukaryotic translation initiation factor 3 subunit C [OS=Homo sapiens]	0	291.457	37	30	492	30	898	103.6	5.53	7334	588.42	30	30	Pf01399, Pf05470	8663		EIF3C	1.111	0.763	0.78	0.603345	0.813366	0.837196	35.41	49.14	44.52	7.09227e+07	7.49591e+07	7.02178e+07	8.69259e+07	8.14436e+07	6.82694e+07	7.09223e+07	1.36574e+07	7.35355e+07	3.09608e+07	6.38835e+07	6.92112e+07	5.27944e+07	3.75732e+07	6.82694e+07	6.05338e+07	7.60531e+06	6.61595e+07	1
High	Master Protein	B4DVR4	cDNA FLJ60912, highly similar to Vinexin [OS=Homo sapiens]	0	36.191	17	4	36	4	385	42.3	8.98	443	45.98	4	4	Pf00018, Pf07653, Pf14604	10174		SORBS3	1.4	1.581	1.014	0.13031	0.0999468	0.53924	35.52	61.65	80.56	1.00728e+06	1.2802e+06	1.34566e+06	1.51482e+06	1.36549e+06	2.76082e+06	2.43858e+06	156628	1.94363e+06	439721	1.09104e+06	1.32637e+06	920027	629955	2.76082e+06	2.08139e+06	87220.4	1.74868e+06	1
High	Master Protein	B4DVR7	cDNA FLJ54181 [OS=Homo sapiens]	0	4.371	14	1	2	1	159	16.5	4.83		0		1		338773		TMEM119	0.744	1.097	1.48	0.215693	0.632395	0.0721466	27.24	26.88	52.29		680770	1.05968e+06	667603	331151	930076	744777		1.16643e+06		580183	1.04449e+06	405469	152774	930076	635685		1.04943e+06	1
High	Master Protein	B4DVS4	cDNA FLJ57619, highly similar to Delta 3,5-delta 2,4-dienoyl-CoA isomerase, mitochondrial [OS=Homo sapiens]	0	50.148	47	9	90	1	191	21	9.82	548	82.35	9	9	Pf00378	1891		ECH1	1.201	0.75	0.641	0.56076	0.610591	0.245472	40.01	20.46	10.25	517717	390623	235993	540077	386403		292873			226006	332906	232610	328016	178263		249974			1
High	Master Protein	B4DVV7	cDNA FLJ51339, highly similar to Methionyl-tRNA synthetase, mitochondrial [OS=Homo sapiens]	0.002	2.543	2	1	2	1	520	58.4	8.28	0	0	1	1	Pf00133, Pf01406, Pf08264, Pf09334	92935		MARS2	1.728	0.853	0.438	0.196888	0.741163	0.0534988	26.95	77.13	15.23	105928	113383	109030	154188	188438	294996	185427	47119.2		46242	96630	107467	93646	86934	294996	158266	26239		1
High	Master Protein	B4DVZ0	cDNA FLJ50253, highly similar to Heat shock 70 kDa protein 12B [OS=Homo sapiens]	0	6.923	4	2	14	2	600	66.8	8.95	156	9.66	2	2		116835		HSPA12B	0.868	0.934	1.032	0.539027	0.946691	0.842982	10.68	7.55	46.25	389201	393473	511866	345265	320000	682116	368320	186929	402853	169903	335335	504529	209697	147629	682116	314370	104094	362445	1
High	Master Protein	B4DVZ5	cDNA FLJ53481, highly similar to Nucleolar autoantigen No55 [OS=Homo sapiens]	0	31.684	12	5	42	5	426	49.1	4.67	555	43.53	5	5		10609		LEPREL4; P3H4	0.972	0.601	0.695	0.898362	0.357622	0.313231	27.41	13.2	22.83	5.73688e+06	5.6632e+06	4.93128e+06	5.29512e+06	4.98186e+06	5.45962e+06	4.03054e+06	2.29013e+06	4.14236e+06	2.50439e+06	4.82643e+06	4.8606e+06	3.21599e+06	2.29834e+06	5.45962e+06	3.44016e+06	1.27529e+06	3.72686e+06	1
High	Master Protein	B4DWB0	cDNA FLJ59772, highly similar to Nucleotide-binding protein-like [OS=Homo sapiens]	0	14.432	16	2	4	2	223	24.4	6.11	80	4.75	2	2	Pf01656, Pf10609	80224		NUBPL	1.034	0.736	0.688	0.982015	0.554548	0.32596	40.85	45.97	35.39	778354	834149	589482	1.0041e+06	839961	550721	1.14243e+06	305987	426235	339785	710899	581032	609840	387508	550721	975089	170393	383481	1
High	Master Protein	B4DWC1	cDNA FLJ51345, highly similar to Histamine N-methyltransferase [OS=Homo sapiens]	0	15.08	15	1	6	1	161	18.4	6.8	75	8.15	1	1	Pf13489, Pf13847	3176		HNMT	0.711	0.629	1.051	0.196258	0.384094	0.817076	27.28	34.31	49.55	241489	356313	564789	253241	234142	284527	355179	63044.4	266206	105420	303665	556693	153806	108019	284527	303154	35107.2	239504	1
High	Master Protein	B4DWC4	chloride intracellular channel protein [OS=Homo sapiens]	0	142.763	51	11	154	11	245	27.8	6.38	1859	177.35	11	11	Pf00043, Pf13409, Pf13410, Pf13417, Pf14497	25932		CLIC4	0.693	0.63	0.948	0.0451417	0.376161	0.380151	22.09	24.86	54.37	2.05172e+07	1.99362e+07	2.27988e+07	1.31825e+07	1.19072e+07	1.61895e+07	1.62021e+07	8.84364e+06	1.79576e+07	8.95664e+06	1.69905e+07	2.2472e+07	8.00639e+06	5.4933e+06	1.61895e+07	1.38289e+07	4.92471e+06	1.61564e+07	1
High	Master Protein	B4DWG0	RCC1 and BTB domain-containing protein 2 [OS=Homo sapiens]	0.001	3.479	2	1	2	1	556	60.9	5.86	13	2.02	1	1	Pf00415, Pf00651, Pf07707, Pf13540	1102	ENSG00000136161.12	RCBTB2	1.086	0.518	0.472	0.827504	0.198879	0.0378696	16.52	9.52	6.38	312249	436890	391172	376842	424766	461201	200366	161625	400990	136310	372337	385564	228875	195962	461201	171017	90003.2	360769	1
High	Master Protein	B4DWG1	cDNA FLJ55643, highly similar to SEC23-interacting protein [OS=Homo sapiens]	0	57.741	13	7	58	7	789	89.7	5.62	454	68.45	7	7	Pf00536, Pf02862, Pf07647	11196		SEC23IP	1.139	0.933	0.801	0.450521	0.619722	0.797613	43.32	67.3	48.76	4.29661e+06	5.67409e+06	7.37399e+06	5.69396e+06	7.33389e+06	8.32115e+06	7.94957e+06	1.41276e+06	6.30739e+06	1.87565e+06	4.83571e+06	7.26829e+06	3.45823e+06	3.38342e+06	8.32115e+06	6.78515e+06	786716	5.67473e+06	1
High	Master Protein	B4DWI8	cDNA FLJ57805, highly similar to Homo sapiens paraspeckle component 1 (PSPC1), transcript variant alpha, mRNA [OS=Homo sapiens]	0	157.226	32	16	264	15	463	52.5	7.25	3925	323.2	16	16	Pf00076, Pf08075, Pf13893, Pf14259	55269		PSPC1	1.174	1.08	0.805	0.429483	0.351607	0.984216	41.36	72.82	50.17	3.34791e+07	3.32831e+07	3.54293e+07	3.7565e+07	3.68413e+07	5.12536e+07	4.6159e+07	1.1345e+07	4.19601e+07	1.46151e+07	2.83654e+07	3.49214e+07	2.28151e+07	1.69964e+07	5.12536e+07	3.93977e+07	6.31763e+06	3.77513e+07	1
High	Master Protein	B4DWV5	GrpE protein homolog [OS=Homo sapiens]	0	7.667	19	2	7	2	196	21.9	8.62	56	2.39	1	2	Pf01025	80273		GRPEL1	1.036	1.083	0.951	0.978695	0.655199	0.768164	49.25	62.19	62.04	1.54146e+06	760441	844238	954710	605970	1.36087e+06	1.19022e+06	475370	1.0085e+06	672915	648082	832136	579843	279559	1.36087e+06	1.01588e+06	264717	907345	1
High	Master Protein	B4DWZ5	cDNA FLJ53016, highly similar to Mitochondrial carnitine/acylcarnitine carrier protein [OS=Homo sapiens]	0	5.143	7	2	12	2	251	27.7	9.35	89	5.78	2	2	Pf00153	788		SLC25A20	1.151	0.466	0.56	0.711924	0.107527	0.102682	54.35	20.53	32.39	1.33926e+06	955639	531251	996526	1.54853e+06	339441	1.43234e+06	237938	331138	584645	814437	523636	605240	714398	339441	1.22254e+06	132499	297923	1
High	Master Protein	B4DX02	cDNA FLJ54921, highly similar to Dual specific itytyrosine-phosphorylation-regulated kinase 1A [OS=Homo sapiens]	0	23.309	9	4	11	4	535	58.9	8.19	122	10.4	4	4	Pf00069, Pf07714	1859		DYRK1A	1.094	1.053	0.997	0.819833	0.737815	0.837448	56.84	55.07	47.83	625434	965256	1.46803e+06	527493	644381	1.44672e+06	574452	696001	1.51914e+06	273029	822634	1.44699e+06	320373	297279	1.44672e+06	490308	387578	1.36676e+06	1
High	Master Protein	B4DX46	cDNA FLJ52663, highly similar to SET and MYND domain-containing protein 5 [OS=Homo sapiens]	0	7.576	6	2	6	2	418	47.3	5.05	60	3.97	2	2	Pf00856	10322		SMYD5	0.862	1.199	1.136	0.530566	0.500966	0.538949	36.62	43.65	46.83	590841	853894	1.0328e+06	540216	376114	1.12755e+06	696553	1.02734e+06	842998	257927	727726	1.018e+06	328100	173517	1.12755e+06	594524	572087	758442	1
High	Master Protein	B4DX85	cDNA FLJ56030, highly similar to Homo sapiens outer dense fiber of sperm tails 2 (ODF2), transcript variant 2, mRNA [OS=Homo sapiens]	0.001	3.263	3	1	1	1	638	73.6	7.61		0		1	Pf01576, Pf03962, Pf04111, Pf04636, Pf07888, Pf12128, Pf13514	4957		ODF2	1.302	2.177	1.672	0.640327	0.145604	0.212036	126.49	120.22	60.28		58186.5			34954.6	164236		265836	60375.4		49589.1			16126	164236		148035	54319.4	1
High	Master Protein	B4DY08	Heterogeneous nuclear ribonucleoproteins C1/C2 [OS=Homo sapiens]	0	213.574	43	17	595	17	288	32	8.72	8777	657.49	17	17	Pf00076, Pf13893, Pf14259	3183	ENSG00000092199.17	HNRNPC	1.207	1.031	1.016	0.301094	0.437608	0.178436	51.04	82.06	99.88	2.34471e+08	1.768e+08	2.01841e+08	2.44438e+08	2.35824e+08	2.00119e+08	1.70971e+08	8.46161e+08	1.89273e+08	1.02357e+08	1.50677e+08	1.98948e+08	1.48459e+08	1.08795e+08	2.00119e+08	1.45928e+08	4.71197e+08	1.70288e+08	1
High	Master Protein	B4DY23	cDNA FLJ61188, highly similar to Basigin [OS=Homo sapiens]	0	220.958	51	10	335	10	262	28.4	6.01	5863	558.41	10	10	Pf07679, Pf07686, Pf13895, Pf13927	682		BSG	1.127	0.532	0.533	0.543045	0.146206	0.0145288	57.99	31.36	30.81	2.39225e+08	1.76966e+08	1.12633e+08	2.07856e+08	2.57144e+08	1.2423e+08	1.66612e+08	1.38996e+07	1.12873e+08	1.04432e+08	1.50818e+08	1.11018e+08	1.26241e+08	1.18631e+08	1.2423e+08	1.42207e+08	7.74018e+06	1.01552e+08	1
High	Master Protein	B4DY26	receptor protein serine/threonine kinase [OS=Homo sapiens]	0	7.244	3	1	10	1	434	48.8	7.77	112	14.03	1	1	Pf00069, Pf01064, Pf07714, Pf08515	7046	ENSG00000106799.12	TGFBR1	0.761	0.503	0.675	0.317806	0.149697	0.328159	9.04	3.31	8.72	735514	676411	634855	568983	514795	255785	370214	195053	347720	321083	576467	625755	345572	237496	255785	315986	108618	312842	1
High	Master Protein	B4DY46	cDNA FLJ53447, highly similar to Syntaxin-binding protein 2 [OS=Homo sapiens]	0	57.873	14	6	39	6	559	62.7	6.51	219	30.56	6	6	Pf00995	6813		STXBP2	1.365	1.38	1.097	0.098717	0.143169	0.239183	26.25	77.98	63.31	3.32245e+06	3.67363e+06	2.59074e+06	3.78476e+06	3.15955e+06	5.86506e+06	4.97107e+06	685829	4.8937e+06	1.45039e+06	3.13083e+06	2.5536e+06	2.29868e+06	1.45763e+06	5.86506e+06	4242925	381914	4.40284e+06	1
High	Master Protein	B4DY51	cDNA FLJ55546, highly similar to Protein GPR89A [OS=Homo sapiens]	0	44.222	15	7	37	7	402	46.5	9.38	408	36.06	6	7	Pf12430, Pf12537	51463		GPR89B	0.812	0.64	0.799	0.261088	0.452435	0.630222	36.36	22.94	38.22	4.27259e+06	8.20756e+06	6.93141e+06	3.54228e+06	4.09321e+06	1.90396e+06	6.3629e+06	1.62933e+06	2.62515e+06	1.86517e+06	6.99484e+06	6.83205e+06	2.1514e+06	1888366	1.90396e+06	5.43088e+06	907316	2.36183e+06	1
High	Master Protein	B4DY85	cDNA FLJ61463, highly similar to Zyxin [OS=Homo sapiens]	0	36.724	11	4	36	4	516	55.4	6.06	369	31.55	4	4	Pf00412	7791		ZYX	1.619	2.171	1.219	0.0233929	0.00962412	0.121284	80.71	98.02	94.27	1.18045e+06	1.46373e+06	1.92224e+06	1.95722e+06	781946	4.40634e+06	3.83492e+06	364717	5.45314e+06	515316	1.24746e+06	1.89469e+06	1.18872e+06	360744	4.40634e+06	3.27319e+06	203098	4.90616e+06	1
High	Master Protein	B4DYW0	mannosyltransferase [OS=Homo sapiens]	0	30.45	5	3	30	3	844	95.9	8.34	639	32.35	3	3	Pf03901, Pf10354, Pf13659				0.907	0.713	0.766	0.596595	0.553055	0.565988	21	7.38	25.07	2.45073e+06	2.22554e+06	1.95859e+06	2.25099e+06	2.10809e+06	1.26754e+06	1.73772e+06	90035.1	1.41255e+06	1.06985e+06	1.89671e+06	1.93051e+06	1.36714e+06	972550	1.26754e+06	1.48318e+06	50137.3	1.27086e+06	1
High	Master Protein	B4DYY5	cDNA FLJ55671, highly similar to Ubiquitin-associated protein 2-like [OS=Homo sapiens]	0	243.922	30	20	211	20	1078	113.5	6.68	3014	293.68	19	20	Pf00627, Pf12478, Pf14555	9898		UBAP2L	1.291	0.893	0.751	0.192442	0.768724	0.663311	36.5	44.8	41.31	1.45952e+07	1.49461e+07	1.62974e+07	2.40571e+07	1.75193e+07	1.39922e+07	1.56157e+07	1.44372e+06	1.71004e+07	6.37142e+06	1.27378e+07	1.60638e+07	1.46111e+07	8.08237e+06	1.39922e+07	1.33284e+07	803954	1.53852e+07	1
High	Master Protein	B4DZ36	cDNA FLJ58441, highly similar to Attractin [OS=Homo sapiens]	0	17.614	3	2	16	2	1156	129.7	6.87	343	8.42	2	2	Pf00059, Pf00431, Pf01344, Pf01437, Pf13418, Pf13854	8455		ATRN	1.406	1.183	0.832	0.307487	0.699028	0.664777	40.07	28.36	21.21	305554	207591	163424	292106	670669	235138	217931	101263	437795	133387	176918	161082	177411	309407	235138	186009	56389.7	393882	1
High	Master Protein	B4DZ39	cDNA FLJ57675, highly similar to Collagen alpha-6(IV) chain [OS=Homo sapiens]	0.002	2.644	4	1	2	1	260	29.3	8.05	29	1.9	1	1	Pf01413	1288		COL4A6	0.807	1.017	1.342	0.4109	0.902434	0.306601	20.66	62.66	33.42	617996	475093	345336	352294		416959	202686	628200	514459	269782	404896	340386	213966		416959	172998	349822	462856	1
High	Master Protein	B4DZ55	cDNA FLJ52097, weakly similar to Homo sapiens transmembrane and tetratricopeptide repeat containing 1 (TMTC1), mRNA [OS=Homo sapiens]	0	69.173	13	8	55	7	914	103.8	8.88	506	55.12	8	8	Pf00515, Pf07719, Pf08409, Pf12895, Pf13181, Pf13414, Pf13424, Pf13431, Pf13432, Pf14559	160418		TMTC3	1.001	0.631	0.711	0.982463	0.432196	0.378319	46.04	22.4	37.77	5.25678e+06	4.9215e+06	4.45723e+06	4.69147e+06	4.43741e+06	5.21946e+06	4.56563e+06	2.10278e+06	7.0716e+06	2.29481e+06	4.19432e+06	4.39334e+06	2.84936e+06	2.04716e+06	5.21946e+06	3896870	1.17096e+06	6.36228e+06	1
High	Master Protein	B4DZE5	cDNA FLJ58806, highly similar to DNA-directed RNA polymerase, mitochondrial [OS=Homo sapiens]	0	4.73	3	2	4	2	927	104.6	9	16	0	2	2	Pf00940, Pf14700	5442		POLRMT	2.036	2.16	1.061	0.0761357	0.128727	0.796859	33.02	36.08	5.87	153455	88942.5	110589	234225	216406			238830		66989.6	75800.7	109003	142256	99837			132996		1
High	Master Protein	B4DZF1	cDNA FLJ56541, highly similar to Ubiquilin-2 [OS=Homo sapiens]	0	75.935	22	7	54	4	512	55	5.55	919	77.16	7	7	Pf00240, Pf00627, Pf09770, Pf11976	29978		UBQLN2	0.951	1.571	1.719	0.796439	0.153598	0.00509002	49.91	59.27	42.34	623298		1.01203e+06	724494	303453	2.56269e+06	521260		3.46505e+06	272096		997526	440021	139995	2.56269e+06	444908		3.11749e+06	1
High	Master Protein	B4DZH5	cDNA FLJ55753, highly similar to Transcription factor 12 [OS=Homo sapiens]	0	5.697	3	1	2	1	681	72.6	7.64	29	2.53	1	1	Pf00010	6938		TCF12	100	100	1.595	1e-17	1e-17	0.234466			11.08				156584	134872			231731					95101.2	62222			129042		1
High	Master Protein	B4DZK8	cDNA FLJ61192, highly similar to Erythrocyte band 7 integral membrane protein [OS=Homo sapiens]	0	30.916	22	5	27	5	280	30.8	8.25	292	24.14	5	5	Pf01145	2040		STOM	0.767	0.518	0.751	0.0955589	0.138609	0.458877	16.65	15.41	32.7	4.02589e+06	4.1892e+06	2.81472e+06	3.06789e+06	3.09602e+06	1.70411e+06	2.77954e+06	670342	1.94538e+06	1.75747e+06	3.57022e+06	2.77437e+06	1.86328e+06	1.42832e+06	1.70411e+06	2.3724e+06	373289	1.75024e+06	1
High	Master Protein	B4DZN1	histone deacetylase [OS=Homo sapiens]	0	44.134	9	7	44	7	1205	130.3	5.3	274	24.97	7	7	Pf00850, Pf02148, Pf09595	10013		HDAC6	0.949	0.866	0.956	0.671256	0.946463	0.705293	42.31	46.41	67.66	2.56939e+06	3.83993e+06	3.89564e+06	3.14679e+06	2.97628e+06	3.15151e+06	3.50168e+06	1.34696e+06	4.59602e+06	1121649	3.27256e+06	3.8398e+06	1.9112e+06	1.37308e+06	3.15151e+06	2.98877e+06	750073	4.13502e+06	1
High	Master Protein	B4DZQ5	cDNA FLJ51417, highly similar to Serine/threonine-protein kinase PRP4 homolog [OS=Homo sapiens]	0	49.9	11	9	47	8	993	115.4	10.27	602	47.15	8	8	Pf00069, Pf07714	8899		PRPF4B	0.966	0.67	0.689	0.79954	0.481712	0.231879	32.44	16.32	21.35	5.45281e+06	4.68494e+06	4.55616e+06	4.85514e+06	5.11927e+06	2.11016e+06	3.88931e+06	2.86389e+06	2.12625e+06	2.38039e+06	3.99271e+06	4.49085e+06	2.94877e+06	2.36173e+06	2.11016e+06	3.31961e+06	1.5948e+06	1.91297e+06	1	Oxidation [P264]
High	Master Protein	B4DZY5	cDNA FLJ54043, highly similar to Lymphoid enhancer-binding factor 1 [OS=Homo sapiens]	0	16.069	13	3	8	3	256	28.9	9.7	104	7.03	3	3	Pf00505, Pf08347, Pf09011	51176		LEF1	0.758	1.637	2.43	0.268551	0.134037	0.00104823	33.64	60.17	88.38	1.6902e+06	1.38847e+06	336197	1.266e+06	321536	330681	642331	2.82565e+06	845483	737843	1.18331e+06	331378	768907	148338	330681	548244	1.5735e+06	760677	1
High	Master Protein	B4E074	cDNA FLJ58655, highly similar to Notchless homolog 1 [OS=Homo sapiens]	0	7.388	7	2	5	2	461	50.7	6.98	43	2.55	2	2	Pf00400, Pf08154, Pf11715	54475		NLE1	0.792	0.97	1.225	0.370464	0.979827	0.504896	20.79	19.89	27.09	200050	284271	243769	236247	193081	114939	314543	507242	198848	87330.3	242268	240275	143485	89076.1	114939	268470	282465	178902	1
High	Master Protein	B4E0B1	cDNA FLJ52100 [OS=Homo sapiens]	0	28.385	8	6	36	6	891	100.9	8.27	163	14.74	5	6	Pf04326, Pf09848, Pf13401, Pf13538	162394		SLFN5	0.78	0.644	0.875	0.251289	0.376219	0.85891	29.65	17.83	28.43	902072	1.27846e+06	1.82388e+06	859795	1.06219e+06	780544	541764	1.06658e+06	813515	393793	1.08956e+06	1.79774e+06	522196	490029	780544	462409	593942	731915	1
High	Master Protein	B4E0C7	cDNA FLJ58558, highly similar to Tripeptidyl-peptidase 1 [OS=Homo sapiens]	0	89.574	14	5	146	5	496	53.8	6.38	2356	107.82	5	5	Pf09286	1200		TPP1	1.134	0.726	0.715	0.567002	0.684996	0.49789	39.12	48.71	49.6	3.89978e+07	3.36829e+07	2.83407e+07	3.31852e+07	3.18438e+07	4.63226e+07	4.4869e+07	7.06145e+06	3.17849e+07	1.70242e+07	2.8706e+07	2.79344e+07	2.0155e+07	1.46909e+07	4.63226e+07	3.82967e+07	3.93227e+06	2.85968e+07	1
High	Master Protein	B4E0D8	cDNA FLJ61510, highly similar to Kinetochore-associated protein 1 [OS=Homo sapiens]	0.002	2.883	1	1	2	1	1134	129.2	5.81	0	0	1	1	Pf10493	9735		KNTC1	0.408	0.411	0.979	0.00364212	0.0769461	0.973895	1.21	3.17	22.62	203392	305233	320999	124548	127417	85406.9	83580.5	141298	116146	88789.2	260133	316398	75644.3	58782.5	85406.9	71337.9	78684	104496	1
High	Master Protein	B4E0E0	cDNA FLJ54898, highly similar to Homo sapiens transmembrane protein 41B (TMEM41B), mRNA [OS=Homo sapiens]	0	23.155	7	1	14	1	291	32.5	9.51	227	28.49	1	1	Pf09335	440026		TMEM41B	1.173	0.867	0.739	0.369051	0.847904	0.496453	36.15	33.89	5.78	8.02143e+06	5.58371e+06	4.20718e+06	7.03887e+06	6.09936e+06		4.86903e+06		4.81713e+06	3501697	4.75868e+06	4.14687e+06	4.27506e+06	2.81388e+06		4155827		4.33394e+06	1
High	Master Protein	B4E0E1	poly [ADP-ribose] polymerase [OS=Homo sapiens]	0	650.389	55	48	1132	48	993	111.1	8.87	14150	1586.73	46	48	Pf00533, Pf00644, Pf00645, Pf02877, Pf05406, Pf08063	142		PARP1	0.968	0.608	0.652	0.731235	0.316012	0.207548	32	25.41	30.2	2.35808e+08	2.50563e+08	2.71467e+08	2.68301e+08	2.30183e+08	2.30862e+08	1.77283e+08	7.30625e+07	2.25923e+08	1.0294e+08	2.13541e+08	2.67576e+08	1.62953e+08	1.06193e+08	2.30862e+08	1.51315e+08	4.06859e+07	2.03262e+08	1
High	Master Protein	B4E0K0	cDNA FLJ52820, highly similar to Nucleoporin p58/p45 [OS=Homo sapiens]	0	38.117	16	5	37	5	440	46	8.46	374	47.68	5	5		9818		NUPL1; NUP58	1.002	0.434	0.477	0.988442	0.0450795	0.00850523	36.37	18.86	23.39	2.04166e+06	2.01319e+06	2.08781e+06	2.52638e+06	2.32638e+06	1.27653e+06	1.16197e+06	228817	1.40735e+06	891273	1.71573e+06	2.05788e+06	1.53439e+06	1.07325e+06	1.27653e+06	991766	127420	1.26618e+06	1
High	Master Protein	B4E0K9	Alpha-mannosidase [OS=Homo sapiens]	0	63.788	12	8	54	8	950	107.4	7.02	645	64.79	8	8	Pf01074, Pf07748, Pf09261	4125		MAN2B1	0.872	0.976	1.042	0.436093	0.553836	0.328857	27.25	39.06	29.93	4.44773e+06	5.09206e+06	5.66948e+06	3.89277e+06	4.46416e+06	6.7167e+06	5.60749e+06	26858.4	5.72884e+06	1.94162e+06	4.33968e+06	5.58822e+06	2.36428e+06	2.0595e+06	6.7167e+06	4.78613e+06	14956.5	5.15421e+06	1
High	Master Protein	B4E0M5	cDNA FLJ58823, highly similar to Thromboxane-A synthase [OS=Homo sapiens]	0	4.346	2	1	2	1	414	47	5.63	42	1.82	1	1	Pf00067	6916		TBXAS1	1.946	2.63	1.031	0.104345	0.0511407	0.841369	35.62	53.78	68.26	119587	100199	43835.9	148109	230260	194948	308621		117456	52205	85394.4	43207.6	89953.8	106228	194948	263415		105674	1
High	Master Protein	B4E0Q2	cDNA FLJ60208, highly similar to Integrin alpha-4 [OS=Homo sapiens]	0	9.155	10	2	10	2	366	39.8	7.14	80	4.18	2	2	Pf01839, Pf13517	3676		ITGA4	1.666	1.073	0.795	0.0806767	0.836559	0.57572	45.08	56.56	36.4	183999	385841	246564	501365	445695	191903	149208		315585	80323.6	328831	243029	304504	205617	191903	127353		283930	1
High	Master Protein	B4E0Q9	cDNA FLJ52821, highly similar to Protein transport protein Sec23A [OS=Homo sapiens]	0	140.902	40	14	183	1	409	45	9.25	2859	231.65	14	13	Pf04811, Pf08033	10484		SEC23A	1.65	5.199	3.46	0.179508	4.45847e-05	5.75546e-06	114.62	103.21	146.27	177444	180057	220244	297076	67402.9	2.14456e+06	503553		2.09767e+06	77462.1	153453	217087	180429	31095.7	2.14456e+06	429795		1.88726e+06	1
High	Master Protein	B4E0R0	cDNA FLJ54220, highly similar to Long-chain-fatty-acid--CoA ligase 1 [OS=Homo sapiens]	0	58.393	18	10	35	10	664	74.2	7.33	556	33.88	9	10	Pf00501	2180		ACSL1	2.652	2.665	1.043	4.81052e-06	0.00196259	0.444121	39.04	110.47	104.63	1.3617e+06	1.43582e+06	650955	3.13033e+06	3.06446e+06	4.9818e+06	8.34425e+06	396776	2.41078e+06	594441	1.22367e+06	641624	1.90121e+06	1.41376e+06	4.9818e+06	7.12201e+06	220950	2.16897e+06	1	Acetyl [N-Term]
High	Master Protein	B4E0X0	cDNA FLJ53844, highly similar to DNA-repair protein complementing XP-G cells [OS=Homo sapiens]	0	7.014	3	1	4	1	429	47.3	4.98	73	4.09	1	1		2073		ERCC5	1.141	0.88	0.771	0.814719	0.827448	0.525495	30.19	29.34	18.86		196959	185283	268509		176966	218082		129447		167857	182627	163079		176966	186138		116463	1
High	Master Protein	B4E0X8	cDNA FLJ61021, highly similar to Far upstream element-binding protein 1 [OS=Homo sapiens]	0	475.701	58	35	900	2	629	66.2	7.56	12468	1230.03	34	35	Pf00013, Pf07650, Pf13014	8880		FUBP1	0.995	0.845	1.017	0.985333	0.884978	0.353822	26.13	73.74	73.45	5.38699e+06	5.7972e+06	7.14505e+06	6.08316e+06	3.73227e+06	9.19736e+06	5.51866e+06	332755	9.86669e+06	2.35165e+06	4.94063e+06	7042629	3.69461e+06	1.72185e+06	9.19736e+06	4.7103e+06	185300	8.87701e+06	1
High	Master Protein	B4E141	cDNA FLJ61028, highly similar to Golgi SNAP receptor complex member 2 [OS=Homo sapiens]	0	5.578	4	1	4	1	232	26.9	7.72		9.68		1	Pf12352				1.261	0.521	0.585	0.432734	0.149844	0.111156	57.17	28.1	38.4	1.23058e+06	1.26013e+06	697419	953518	1.67634e+06	879595	640887	109379	979917	537200	1.07394e+06	687422	579119	773365	879595	547012	60909.2	881626	1	Acetyl [N-Term]
High	Master Protein	B4E1E2	cDNA FLJ61530, highly similar to Hepatocyte growth factor-regulated tyrosine kinase substrate [OS=Homo sapiens]	0	32.343	10	5	51	5	661	74.8	7.99	281	43.85	5	5	Pf00790, Pf01363, Pf12210, Pf13388	9146		HGS	1.069	1.071	0.947	0.709999	0.360838	0.566279	30.2	76.2	65.32	4.64456e+06	5.41727e+06	5.6904e+06	5.00598e+06	5.05246e+06	8.76317e+06	6.339e+06	657767	8.07807e+06	2.02755e+06	4.61684e+06	5.60883e+06	3.04038e+06	2.33091e+06	8.76317e+06	5.41049e+06	366287	7.2678e+06	1
High	Master Protein	B4E1G5	cDNA FLJ53692, moderately similar to Granulins [OS=Homo sapiens]	0.001	3.202	2	1	2	1	436	46.7	6.77	26	1.89	1	1	Pf00396	2896		GRN	2.282	2.392	0.793	0.0076849	0.0687496	0.590353	47.82	128.44	74.27	268366	133201	141082	425808	265209	612432	337504	42589.6	706467	117153	113520	139060	258614	122352	612432	288067	23716.7	635605	1
High	Master Protein	B4E1J8	cDNA FLJ56285, highly similar to ADP-ribosylation factor-like protein 8B [OS=Homo sapiens]	0	74.909	39	8	125	2	238	27.2	9.66	1484	177.02	8	8	Pf00025, Pf00071, Pf00503, Pf04670, Pf08477, Pf09439	55207		ARL8B	0.903	0.542	0.668	0.517751	0.165717	0.290357	22.09	18.56	28.9	2.66523e+07	2.74034e+07	2.26105e+07	2.58653e+07	2.56182e+07	1.90504e+07	3.18233e+07	9.12844e+06	1.30333e+07	1.16349e+07	2.33544e+07	2.22864e+07	1.57093e+07	1.18187e+07	1.90504e+07	2.71619e+07	5.0833e+06	1.1726e+07	1
[truncated: 4,705 more rows]

## Sheet: ECM fraction (all)
Protein FDR Confidence: Combined	Master	Accession	Description	Exp. q-value: Combined	Sum PEP Score	Coverage [%]	# Peptides	# PSMs	# Unique Peptides	# AAs	MW [kDa]	calc. pI	Score Mascot: Mascot	Score Sequest HT: Sequest HT	# Peptides (by Search Engine): Mascot	# Peptides (by Search Engine): Sequest HT	Pfam IDs	Entrez Gene ID	Ensembl Gene ID	Gene Symbol	Abundance Ratio: (Day 18) / (Day 14)	Abundance Ratio: (Day 25) / (Day 14)	Abundance Ratio: (Day 25) / (Day 18)	Abundance Ratio P-Value: (Day 18) / (Day 14)	Abundance Ratio P-Value: (Day 25) / (Day 14)	Abundance Ratio P-Value: (Day 25) / (Day 18)	Abundance Ratio Variability [%]: (Day 18) / (Day 14)	Abundance Ratio Variability [%]: (Day 25) / (Day 14)	Abundance Ratio Variability [%]: (Day 25) / (Day 18)	Abundances (Normalized): F1: Sample, Day 14	Abundances (Normalized): F4: Sample, Day 14	Abundances (Normalized): F7: Sample, Day 14	Abundances (Normalized): F2: Sample, Day 18	Abundances (Normalized): F5: Sample, Day 18	Abundances (Normalized): F8: Sample, Day 18	Abundances (Normalized): F3: Sample, Day 25	Abundances (Normalized): F6: Sample, Day 25	Abundances (Normalized): F9: Sample, Day 25	Abundance: F1: Sample, Day 14	Abundance: F4: Sample, Day 14	Abundance: F7: Sample, Day 14	Abundance: F2: Sample, Day 18	Abundance: F5: Sample, Day 18	Abundance: F8: Sample, Day 18	Abundance: F3: Sample, Day 25	Abundance: F6: Sample, Day 25	Abundance: F9: Sample, Day 25	# Protein Groups	Modifications
[truncated: 5,108 more rows]

[truncated: 2 more sheets: Cellular fraction (matrix), ECM fraction (matrix)]
