# Supplementary material for: Kidney organoids recapitulate human basement membrane assembly in health and disease
Source: eLife. 2022 Jan 25;11:e73486. doi: 10.7554/eLife.73486 (PMC8849328; doi:10.7554/eLife.73486)
Supplement: Supplementary file 3. [file elife-73486-supp3.xlsx]

## Sheet: Cell clusters & marker genes
Dataset: Single cell RNA-Seq, human kidney organoids (GSE114802)
Publication: Combes AN, Zappia L, Er PX, Oshlack A et al. Genome Med 2019; 11(1):3 (PMID: 30674341)
Day 25 kidney organoid clusters:	Cluster1	Cluster2	Cluster3	Cluster4	Cluster5	Cluster6	Cluster7	Cluster8	Cluster9	Cluster10
Cell types	Stroma	Stroma	Stroma	Cell Cycle	Endothelium	Podocyte	Cell Cycle	Stroma	Neuron	Nephron
				Nephron Progenitor			Nephron Progenitor		Muscle Progenitor
Marker genes	COL21A1	IGF1	MAB21L2	CENPV	PECAM1	NPHS2	PHF19	COL9A3	SOX2	PAX8
	GATA3	CRABP1	CXCL14	TMSB15A	CAV1	PODXL	TOP2A	COL2A1	TUBB2B	PAX2
	GATA3-AS1			DEK	KDR	NPHS1		COL9A2	TAGLN3	EMX2
				CORO1A		SYNPO			FABP7
									ACTC1
									PITX2
									MYOD1
Dataset: Single cell RNA-Seq of E18.5 developing mouse kidney and human kidney organoids (GSE108291)
Publication: Combes AN, Phipson B, Lawlor KT, Dorison A et al. Development 2019; 146(12). (PMID: 31118232)
E18.5 Mouse kidney clusters:	Cluster1	Cluster2	Cluster3	Cluster4	Cluster5	Cluster6	Cluster7	Cluster8	Cluster9	Cluster10	Cluster11	Cluster12
Cell types	Nephron Progenitor	Distal Tubule/Loop of Henle	Cortical Stroma	Cell Cycle	Medullary Stroma	Collecting Duct-associated Stroma	S-Shaped Body	Other	Immune Cell	Vasculature	Early Proximal Tubule	Podocyte
	Stroma-related Nephron Progenitor	Ureteric Epithelium			Ureteric Stroma						Proximal Tubule
	Committing Nephron Progenitor
Marker genes	Cited1	Mal	Fibin	Cenpw	Aspn	Penk	Clu	-	Fcgr3	Pecam1	Fbp1	Nphs1
	Crym	Cldn8	A230065H16Rik	Hmgb2	Col14a1	Alx1	Clec18a		Laptm5	Gimap6	Gsta2	Gadd45a
	Spock2	Wfdc2	Gdnf	H2afz	Dcn	Thy1	Osr2		Ms4a6c	Plvap	Ttc36	Synpo
	Traf1	Wfdc15b	Ntn1	Cenpf	Ace2	Nts			Coro1a	Cdh5	Aldob	Nphs2
	Eya1	Cldn3	Meis1	Top2a	Clca3a1	Nrxn3			Aif1	Cd34	Ass1
	Six2	Gata3	Mgp		Col6a2				Cd52	Gimap4	Fxyd2
	Tgfbi	Tfap2b	Hic1		G0s2					Fam167b	Pdzk1ip1
	Gas1	Epcam			Fbln5						Spp2
	Siglecg				Col6a1						Pdzk1
	Meox1
	Cped1
	Capn6
Dataset: Pilot Fetal Cell Atlas RNAseq (EGAS00001002553)
Publication: Young MD, Mitchell TJ, Vieira Braga FA et al. Science 2018; 361:594-599 (PMID: PMID: 30093597)
8/9 wpc human fetal kidney:	Cluster1	Cluster2	Cluster3	Cluster4	Cluster5	Cluster6	Cluster7	Cluster8	Cluster9	Cluster10
Cell types	Other	Cap Mesenchyme	Stroma	Other	Immune Cell	Vasculature	Ureteric Bud	Fibroblast	Podocyte	Fibroblast
			Stroma-related Nephron Progenitor			Endothelium	Distal Tubule	Stroma
								Medullary Stroma
Marker genes	-	CITED1	TAGLN	-	TYROBP	PECAM1	ELF3	PRRX1	PTPRO	EMILIN1
		SIX1	TPM1		CCL3	PLVAP	HNF1B	LUM	NPHS2
		SIX2	TPM2		FCER1G	EGFL7	CDH16	SFRP2	MAFB
		PAX2				KDR	POU3F3	ASPN	NPHS1
							KCNJ15		PODXL
									WT1
Dataset: Kidney Single Cell Study (EGAS00001002325)
Publication: Young MD, Mitchell TJ, Vieira Braga FA et al. Science 2018; 361:594-599 (PMID: PMID: 30093597)
Human adult kidney* (no PT cells included):	Cluster1	Cluster2	Cluster3	Cluster4	Cluster5	Cluster6	Cluster7	Cluster8	Cluster9	Cluster10	Cluster11	Cluster12	Cluster13	Cluster14	Cluster15
Cell types	Other	Vasculature	Distal Tubule/Loop of Henle	Ureteric Epithelium	Immune Cell	Tubular Epithelium	Immune Cell	Collecting Duct	Collecting Duct	Ureteric Epithelium	Immune Cell	Endothelium	Ureteric Epithelium	Pelvic Epithelium	Fibroblast
		Endothelium						Tubular Epithelium	Ureteric Bud				Collecting Duct
									Nephron
Marker genes	-	ITGA8	PCP4	SIGIRR	CD3D	ACSM2A	MAFB	ATP6V0D2	TFCP2L1	UPK3A	FCGR3A	SPARCL1	AQP2	KRT5	FN1
		PTPRB	TUBB2B	HSP90AA1		ENPEP		FXYD2	POU3F3			PLVAP	LCN2	S100P
		EMCN	CLDN16	HSPE1		LRP2			CLCNKB				SAA2
				GAMT					CLDN8
				ZFAND2A					PAX8

## Sheet: Kidney org exp values
Cell type	ACAN	ACHE	ADAMTS1	ADAMTS10	ADAMTS13	ADAMTS14	ADAMTS15	ADAMTS16	ADAMTS17	ADAMTS18	ADAMTS19	ADAMTS2	ADAMTS20	ADAMTS3	ADAMTS4	ADAMTS5	ADAMTS6	ADAMTS7	ADAMTS8	ADAMTS9	AGRN	AMELX	AMTN	ANG	BCAN	BGN	CCDC80	COL12A1	COL14A1	COL15A1	COL17A1	COL18A1	COL28A1	COL2A1	COL4A1	COL4A2	COL4A3	COL4A3BP	COL4A4	COL4A5	COL4A6	COL5A1	COL5A2	COL5A3	COL6A1	COL6A2	COL6A3	COL6A5	COL6A6
Cell cycle	0.186514	0.543357	0.883766	111989829649896	0.199377	0.0148527	0.0745047	0.227207	0.0829419	0.159737	0.271443	0.253774	0.083106	0.403985	0.270035	0.60123	221308848061914	130024093654355	0.105087	12791877232491	162161684741457	0	0	0.534834	0.107046	26519185495614	571012651316345	221589095599612	0.659303	0.0755421	0.0156499	0.534226	0.063052	383832335157907	223727211951279	383396378814299	0	11479191502634	0.0127194	164355247784476	0.486215	286739676106223	408895860640186	0.0584607	355122599975745	433274670423219	393973384708096	0	0.0550037
Endothelium	0	0.0842212	0.425871	0.72766	0.171588	0	0.0146894	0.0372063	0.0337394	0.0113439	0.0411709	0.0496384	0	0.0825062	0.0526239	0.0652904	0.266157	19366618856601	0.0351566	143980856343377	30685620249721	0	0	0.459	0.00896925	341731702959603	0.46851	0.469405	0.0373724	576944764553764	0.00934918	234849615428262	0	0.317334	878601273806308	843825012753633	0	1141626924398	0	0.79396	0.131033	0.9154	299585551444488	0	0.903379	384250815525283	0.253168	0	0.00982577
Nephron	0.214366	0.498411	258185973197317	0.744836	0.3062	0	0.532279	0.293562	0.13233	0.128266	0.074085	0.340097	0.0272099	0.237334	0.0976657	0.31274	0.786904	0.375715	0.344816	169467958835603	347200810137232	0	0	0.281963	0	165917924763541	436414303545633	0.241643	0.219967	0.0399245	0.0118007	376099313252036	0.0322901	469025904806403	29355998978092	472806662076316	0.0593323	151082840488105	0.233532	257552441899482	150767932620942	0.787331	123921061350727	0.0259452	273660078098361	102806456861035	157414610151815	0	0
Neuron	0.101316	0.739453	0.270908	0.55121	0.159856	0	0.20526	0.15253	0.114672	0.0129789	0.101569	0.104892	0.0349732	0.801056	0.133794	0.466749	0.953569	0.76618	0.302968	0.545971	118158148481287	0	0	0.348112	0.10642	0.427823	452617541501098	0.685263	0.635539	0.0874581	0.0266842	10769474990205	0.0364104	444759833182713	0.57923	118013501672378	0	116156040205502	0	163679177760981	102815082340448	14039709065755	208090878918204	0.0739708	301829626166189	198335500029113	145463229091881	0	0
Podocyte	0	0.267449	10625547447927	0.268943	0.167615	0	0.493698	0.0118638	0.0215485	0.0325084	0.0315008	0.0672875	0	0.204338	0.0642807	0.0615047	0.261999	145656544302646	0.280148	517703788866191	59095208591629	0	0	0.106663	0	610465198404974	241691381957528	0.461962	0.0357223	0.0563807	0	23922135756291	0.0215724	0.36626	34683943661926	521194129214117	0.567997	138810030736426	179580605687617	3623669501491	0.746229	0.406439	130029043315551	0	0.882107	0.223044	0.231156	0	0.0573477
Stroma	0.23397	0.672206	0.945911	101007008299763	0.182865	0.00940025	0.0909941	0.423924	0.048726	0.0845122	0.480636	0.242902	0.0505308	0.293732	0.22905	0.756248	292855800002121	107765041931255	0.0314742	118938510601057	166606673777681	0	0	0.338725	0.223055	37511867870438	504506415908221	280751400657344	0.853323	0.112092	0.0146687	0.495685	0.0620617	280128964346812	284330651254206	381205427566268	0.0155291	114800916536557	0.0370001	14361703797789	0.292646	349694858217766	380295571941231	0.0332736	403052737414436	462977326949512	402368787583444	0.00294267	0.0359612
[truncated: 119 more columns]

## Sheet: E18.5 mouse kidney exp values
Cell type	Acan	Ache	Adamts1	Adamts2	Adamts3	Adamts4	Adamts5	Adamts6	Adamts7	Adamts8	Adamts9	Adamts10	Adamts13	Adamts14	Adamts15	Adamts16	Adamts17	Adamts18	Adamts19	Adamts20	Agrn	Amelx	Amtn	Ang	Bcan	Bgn	Ccdc80	Col4a3bp	Col2a1	Col4a1	Col4a2	Col4a3	Col4a4	Col4a5	Col4a6	Col5a1	Col6a1	Col6a2	Col6a3	Col7a1	Col8a1	Col8a2	Col9a1	Col9a2	Col9a3	Col12a1	Col14a1	Col15a1	Col17a1
Cell Cycle	0.0113115	0.0161257	0.931869	0.0361023	0.0475674	0.426262	0.221438	0.0367296	0.306431	0.030194	1.90598	1.09768	0.0199701	0.0238693	0.195413	0.231648	0.274364	0.203667	0.179047	0.124624	2.24919	0	0	0.22967	0.00941806	1.36149	1.969	1.02128	2.70883	5.33046	4.97887	0.0291475	0.146967	1.10335	0.321115	0.372302	0.362898	0.288572	0.254364	0.261497	0.0534405	0.166345	0.92652	0.0164473	0.0601932	0.339373	0.217354	0.217974	0.00971182
Collecting duct-associated stroma	0	0.0293551	2.32467	0.726916	0.0159838	0.489668	0.221537	0.130872	0.987706	0.0279999	0.994977	1.77722	0	0.0158226	0.601777	0.0631234	0.610648	0.682505	0.295281	0.393856	1.22164	0	0	0.375391	0.0161206	8.53066	6.08481	0.41672	0.0303496	7.28868	6.37092	0.028476	0.123462	0.57735	0.16872	3.35642	5.82371	4.95461	3.90624	0.543134	0.0923632	1.1508	0.209829	1.04439	0.0324074	2.83228	3.31198	6.16498	0.0144731
Cortical Stroma	0	0	1.37883	0.528086	0.105316	0.204336	2.25312	0.261944	0.62835	0	1.33106	1.90712	0	0.0663909	0.0562239	0.0183609	0.18945	0.0482752	0.257339	0.241581	1.01849	0	0	0.420785	0	5.98596	4.84947	0.750856	0.0721697	3.68441	2.95325	0.589541	2.21922	1.00751	0.148145	1.88346	3.13274	2.54201	2.61132	0.115535	1.09132	1.33179	0.0680069	0.0545692	0.00726894	3.11083	1.45415	0.70651	0.0484808
Distal Tubule/Loop of Henle	0.0154751	0.124475	2.76332	0.0383496	0.0232114	0.0475138	0.247433	0.0152121	0.115296	0	1.77119	0.76909	0	0.0173734	0.0586113	2.03338	0.257069	0.555437	0.0365925	0.115117	3.20661	0	0	0.523295	0.00990524	0.613057	0.442459	1.18593	0.453534	5.80909	3.92211	0.188029	0.525025	1.58947	0.201945	0.157789	0.273794	0.19585	0.0847655	0.0565161	0.0242295	0.0388174	0.247063	0.0727499	0.883186	0.131851	0.316509	0.239497	0
Early Proximal Tubule	0	0	3.05131	0	0	0	0	0.070139	0.0631672	0	1.55975	0.0581756	0	0	0.542947	0.817832	0	0	0	0	1.62079	0	0	0	0	0.60054	0.0708904	1.03496	0	3.76967	2.95196	0	0.0764937	0.492883	0	0	0.0867263	0.236851	0	0	0	0	0	0	0	0.0796014	0.127385	0.0764606	0
Immune cell	0	0.0301518	0.315799	0	0	0	0.0645948	0.0808338	0.0880532	0	0.0284853	0.653265	0	0	0	0.107252	0	0	0.0286582	0	0.233494	0	0	3.88821	0	0.638906	0.264652	0.933484	0.02396	0.611633	0.588249	0	0.0246665	0.0530189	0	0.0957925	0.412783	0.366837	0.117897	0.0289108	0.112392	0.0578542	0.05881	0	0.0277988	0.145473	0.533841	0.190015	0
Medullary Stroma	0	0.0122659	2.79369	2.154	0.0566989	0.289324	2.16881	0.142359	1.1862	0.0356883	1.20769	2.50754	0	0.245448	0.223674	0.105726	0.203256	0.0917612	0.323347	0.255932	1.00726	0	0	0.575372	0.0109005	8.52176	6.06805	1.01794	0.0441087	6.10958	5.37512	0.109489	0.266378	0.419647	0.0854644	4.23527	7.60227	7.18891	4.44578	0.127217	0.492916	1.13179	0.200338	0.287972	0.0691425	3.70488	6.67389	1.29162	0.0769908
Nephron progenitor	0	0.0148034	0.638769	0.0561246	0.00670522	0.115935	0.156894	0.0208272	0.124758	0.0206961	1.00267	0.747848	0.00674872	0.00659376	0.0542976	0.198297	0.557739	0.0349897	0.141507	0.0271052	1.01493	0	0	0.140715	0	1.04452	2.04972	0.540288	2.57123	3.7539	3.81873	0.0134114	0.0697271	0.808199	0.129601	0.303954	0.36238	0.423115	0.114267	0.367646	0.0287026	0.0608545	0.759881	0.0344169	0.0578476	0.331297	0.290434	0.237753	0.0078537
Other	0	0.107016	3.97135	0.734323	0.0982099	0.415084	1.57261	0.0621958	0.968464	0.0165811	2.916	2.06102	0.0151849	0.153485	0.458397	1.16968	0.956664	0.705499	0.322379	0.2632	3.56427	0	0	0.399272	0	5.61403	4.269	1.51381	2.364	7.08584	6.32387	0.277357	0.821354	1.77394	0.317835	2.52745	3.78768	3.78698	2.89657	0.542254	0.510331	0.929948	0.46652	0.385	0.374768	2.74865	3.12908	2.42989	0.0144181
Podocyte	0	0	2.73715	0.142576	0.0658517	0.169017	1.01453	0	0.716099	0.167972	2.66953	0.457159	0	0.0921814	0.628954	0.908824	0.242003	0.208822	0	0.146566	3.8846	0	0	0.204298	0	2.01441	1.75903	1.08579	0.271623	5.32851	5.53943	2.68042	3.33626	3.00518	0.365365	0.592547	0.416753	0.296959	0	0	0	0.0702056	0	0	0.338161	0.443493	0.610091	0.45655	0.0827144
S-Shaped Body	0	0	7.93098	0.0726572	0	0.0767857	0.46075	0.232579	0.0270372	0	3.70025	0.408726	0	0.0141844	1.00115	3.2011	0.0497303	0	0.0519975	0.0261255	5.57375	0	0	0.201274	0	0.611996	0.544086	1.81262	0.366078	7.65859	5.65325	0.0368198	0.115017	1.88902	0.206497	0.391962	0.364169	0.261691	0.168495	0.0855315	0.0413268	0.0231056	0.056323	0.0581141	0.0270528	0.0779706	0.170293	0.116236	0.0232178
Vasculature	0	0.0526994	2.14902	0.0757246	0.0612202	0.903793	1.53179	0.125313	0.296579	0	2.02583	1.75832	0	0.0291579	0.0262405	0.107576	0.0293169	0	0.025603	0.0219498	3.10634	0	0	0.0570653	0	4.50305	1.83571	1.09505	0.119004	7.58665	6.37578	0.0864658	0.117756	0.629354	0.130505	0.456905	0.419941	0.39503	0.306902	0	0.087287	0.0904261	0.0705366	0.0293169	0.0637918	0.285711	0.529461	4.23542	0.0509951
[truncated: 115 more columns]

## Sheet: 8,9 wpc human kid exp values
Cell type	ACAN	ACHE	ADAMTS1	ADAMTS2	ADAMTS3	ADAMTS4	ADAMTS5	ADAMTS6	ADAMTS7	ADAMTS8	ADAMTS9	ADAMTS10	ADAMTS13	ADAMTS14	ADAMTS15	ADAMTS16	ADAMTS17	ADAMTS18	ADAMTS19	ADAMTS20	AGRN	AMELX	AMTN	ANG	BCAN	BGN	CCDC80	COL4A3BP	COL2A1	COL4A1	COL4A2	COL4A3	COL4A4	COL4A5	COL4A6	COL5A1	COL6A1	COL6A2	COL6A3	COL7A1	COL8A1	COL8A2	COL9A1	COL9A2	COL9A3	COL12A1	COL14A1	COL15A1	COL17A1
Cap Mesenchyme	0.130882	0.594903	1.643	0.200383	0.422615	0.131961	1.01437	0.11391	0.430508	0.0728211	0.883371	0.331822	0.0758307	0	0.521199	0.175874	0.0666471	0.0469756	0.143682	0.0864474	1.41833	0	0	0.276822	0.0070317	1.30394	4.71744	1.88405	5.83012	2.50152	3.65172	0.0267421	0.0400234	0.841436	0.240309	0.525252	4.45345	4.03307	2.85111	0.297286	0.122552	0.0547238	3.41028	4.4759	0.433399	0.440895	0.662866	0.0661956	0.0239647
Fibroblast	0.199578	0.536872	3.19307	0.410431	0.108182	0.240222	0.385452	0.603629	1.11421	0.0426143	1.34362	0.415459	0.131996	0.0520027	0.152379	0	0	0	0	0	2.43154	0	0	0.146548	0.0476086	4.60213	3.47586	1.00803	0.795779	5.24378	5.4733	0	0.0886384	1.41337	0	1.78658	5.84527	7.54525	5.92115	0.478401	0.383425	0.147362	0.607952	0.26436	2.30914	1.97485	0.658035	0.288652	0.0552495
Fibroblast/Stroma/Medullary Stroma	0.0520971	0.978125	5.54227	2.61503	0.232763	1.84672	2.02558	1.80692	1.02966	0.100718	1.7158	1.53448	0.218378	0.16781	1.4051	1.44624	0.0662874	0.024865	0.811164	0.048155	1.33658	0	0	0.824165	0	5.17755	7.37302	3.8443	0.425057	2.85529	3.63561	0	0.0231271	1.20751	0.142928	7.51467	8.74722	10.0542	4.87819	0.164794	0.53728	1.42084	0.893368	0.36574	5.78613	7.5232	6.37591	0.690307	0.112202
Immune Cell	0.0691717	0.0459108	0.610904	0.0618077	0.0255963	0.225454	0.0518918	0.0812565	0.208805	0	0.373773	0.250993	0.0107691	0	0.114994	0.0162511	0.07491	0	0.0273277	0	0.586675	0	0	0.224691	0	0.919902	0.64501	1.37703	0.0547699	1.01095	1.38798	0	0.100668	0.192329	0	0.658102	0.622085	1.70803	1.6202	0.0176173	0.016868	0.139977	0.03701	0.317903	0.436371	0.435727	0.28999	0.305054	0.011286
Other	0	0.0881854	0.417777	0.0175853	0.0360766	0.0284182	0.0912425	0.0727467	0.0978172	0.0486714	0.339591	0.110512	0.023898	0	0.110634	0.0720419	0.0101694	0.0167923	0.0539166	0.00812763	0.482935	0	0	0.035748	0.0078174	0.938749	0.946751	0.242862	0.759062	0.637408	1.10649	0.00588013	0.014035	0.173994	0.0328821	0.230846	0.929549	1.08721	0.848248	0.0646595	0.0169842	0	0.474492	0.525467	0.23974	0.185016	0.106149	0.0406431	0
Podocyte	0.0324022	0.73608	2.10696	0.231402	0.431912	0.0240349	0.501405	0.154637	0.965205	0.60528	5.15991	0.355335	0.354039	0	0.857002	0.169206	0.0491296	0.0557009	0.928965	0	4.81311	0	0	0.176366	0.0254037	5.87376	3.88316	2.13342	1.71285	2.82505	3.85203	0.750276	1.39709	1.7723	0.237229	0.278018	3.66362	2.05663	2.1734	0.343963	0.103376	0	4.77462	1.14891	0.499413	0.648576	0.100488	0.0559195	0
Stroma/Stroma-related Nephron Progenitor	0.151353	0.711707	4.33859	0.709289	0.304166	0.262575	0.668193	0.524833	1.45248	0.0256602	1.97052	0.848404	0.146433	0.0325867	0.267155	0.0494062	0.0181043	0.0331855	0.294004	0.0122416	2.35306	0	0.0256193	0.448154	0.125115	7.67429	6.15348	2.56963	0.979724	6.97054	6.85867	0.0125791	0.00623566	1.85541	0.212116	2.42942	7.33755	8.38923	7.09829	0.288505	0.67923	0.0580888	1.17265	0.742757	2.60449	2.76531	1.0642	0.307386	0.00670647
Uretic Bud/Distal Tubule	0.0350874	0.471888	3.88931	0.124934	0.27854	0.0643548	0.356761	0.116478	0.438709	0.072178	2.46652	0.287937	0.147356	0	0.798407	1.76568	0	0.289912	0.149117	0.0198758	3.78447	0	0	0.269903	0	1.17562	1.36128	2.24351	0.724404	4.06586	4.94275	0.321432	0.939806	1.81962	0.329038	0.878448	4.11079	1.56947	1.62608	0.120915	0.0989854	0	0.320912	0.972235	1.27253	0.382819	0.144743	0.0484197	0.0805672
Vasculator/Endothelium	0.0819696	0.335225	3.43575	0.157971	0.237467	0.451949	0.647868	0.863133	2.00036	0.0139279	3.9882	0.862128	0.135572	0.0138266	0.179908	0.052523	0	0.0169593	0.0243751	0	3.85011	0	0	0.48218	0.0151667	2.25699	0.90902	2.37265	0.166054	7.10143	7.20985	0.0189181	0.0164131	1.26431	0.0814132	2.22963	3.0047	6.84915	2.52706	0.0824656	0.122765	0.069683	0.122672	0.141471	0.936969	0.883521	0.280923	3.62847	0.0276804
[truncated: 118 more columns]

## Sheet: Adt hum kid (no PT) exp values
Cell type	ACAN	ACHE	ADAMTS1	ADAMTS2	ADAMTS3	ADAMTS4	ADAMTS5	ADAMTS6	ADAMTS7	ADAMTS8	ADAMTS9	ADAMTS10	ADAMTS13	ADAMTS14	ADAMTS15	ADAMTS16	ADAMTS17	ADAMTS18	ADAMTS19	ADAMTS20	AGRN	AMELX	AMTN	ANG	BCAN	BGN	CCDC80	COL4A3BP	COL2A1	COL4A1	COL4A2	COL4A3	COL4A4	COL4A5	COL4A6	COL5A1	COL6A1	COL6A2	COL6A3	COL7A1	COL8A1	COL8A2	COL9A1	COL9A2	COL9A3	COL12A1	COL14A1	COL15A1	COL17A1
Collecting Duct/Tubular Epithelium	0	0	0.00983881	0	0	0	0.103366	0	0	0	0	0	0	0	0	0.0224819	0	0	0	0	0.0112767	0	0	0.0313624	0	0	0.0211541	0.28955	0	0.00946435	0.0452855	0.0290823	0.0681452	0	0	0	0.141597	0	0	0	0	0	0	0.043087	0.0922829	0	0	0	0
Collecting Duct/Ureteric Bud/Nephron	0	0.20335	1.79371	0.0295922	0.0853184	0.0441115	0.429474	0.123007	0.0147348	0.0490675	0.978768	0.117374	0.115473	0.0213001	0.116048	0.394943	0.0924506	0.179025	0.0358113	0	2.90299	0	0.00463784	1.09055	0.0184766	0.922368	1.02308	1.91192	0	1.62149	2.11307	2.10141	2.4482	1.03173	0.225899	0.158746	4.19636	0.90316	0.378169	0.170963	0.365352	0.0319579	0.0266754	1.32116	0.437103	0.455338	0.237645	0.0691761	0.0418975
Distal Tubule/Loop of Henle	0	0	0.0167027	0	0	0	0.00643763	0	0	0.026486	0.057683	0	0.00711724	0	0.0110446	0	0	0	0	0	0.0973452	0	0	0.0783541	0	0	0.0203586	0.225577	0	0.0978781	0.165885	0.101328	0.069086	0.0065444	0	0.00643763	0.21774	0	0.0427952	0.00693178	0.0724496	0	0.0219857	0.00881064	0.0496544	0	0	0	0
Endothelium	0.0177305	0.0190314	0.721009	0	0	0.0174692	0	0.658724	0.0932333	0	0.197871	0.151218	0.020846	0	0	0	0	0	0	0	0.234359	0	0	0.194207	0	0.172646	0.0408403	0.728589	0	1.52623	1.94994	0.0199986	0.0357351	0.0191673	0	0.0181935	0.601091	0.336122	0.0558207	0	0.151273	0	0	0.0231105	0	0.0191138	0	1.07774	0.0194079
Fibroblast	0	0.0310736	0.895127	0	0.0310193	0.150082	0	0.823299	0.0935527	0.0262906	0.271567	0.139277	0	0	0.0275844	0	0.0233096	0	0	0	0.335237	0	0	0.553196	0	0.32863	0.206343	0.939048	0	1.92394	2.19984	0	0	0	0	0.155001	0.678232	0.517262	0.358754	0	0.215298	0	0	0	0.0307537	0.110081	0	1.19761	0
Immune Cell	0.0104324	0.0192744	0.224866	0.0406607	0	0.0277004	0.0109428	0.110717	0.00571557	0.00307786	0.0352744	0.159111	0.0115577	0.00612816	0.0142827	0.00881081	0.0564334	0.00313013	0	0	0.140045	0	0	0.314207	0.00631347	0.0678248	0.0238165	0.988633	0.00226132	0.0985457	0.117978	0.0323791	0.0810473	0.0166595	0.00608529	0.0188734	0.147338	0.327376	0.375176	0.00921696	0.0288864	0.0417733	0.00618774	0.185996	0.0338212	0.013768	0.00566684	0.0412879	0.00614045
Other	0	0	0.297886	0	0	0.0055743	0.017057	0.108374	0.00629347	0	0.10914	0.0229363	0	0	0.00588682	0.018619	0.00658533	0.00599768	0	0	0.075723	0	0	0.0959162	0	0.133589	0.0310773	0.171469	0	0.111494	0.238821	0.102031	0.055615	0.0422423	0	0.0165927	0.201519	0.077396	0.0910819	0.0240973	0.00594508	0.00452233	0	0.0655118	0.0223511	0.0234689	0.00490505	0.0581059	0.00616202
Pelvic Epithelium	0	0.0279816	0.599252	0.0139695	0	0.0822894	0.0122586	0	0.0146647	0	0.118048	0.0284704	0.0675241	0	0	0.0142731	0	0	0	0	1.74071	0	0	1.43043	0	0.0875472	0.86702	2.15783	0.0138841	0.0120037	0.0135043	0.0136735	0.0132586	2.0872	0.78976	0.028254	1.45417	0.751365	0.015413	0.386165	0.0396617	0	0	2.08633	0.866724	0.342068	0.0262785	0.0398158	1.84158
Tubular Epithelium	0.0242281	0.052479	0.445313	0.0164141	0.00905068	0.0238658	0.0976258	0.0655515	0.0766677	0.0219266	0.6877	0.0250882	0.019704	0	0.0546691	0.0392828	0.020391	0.00727927	0.0650765	0	0.451435	0	0	0.998729	0	0.238015	0.162195	0.869154	0	0.52776	0.782532	0.729167	0.492357	0.10888	0	0	0.536302	0.089036	0.199014	0.0818318	0.0247335	0.00714598	0.0210991	0.0383997	0.302597	0.0301791	0.00737833	0.0154848	0
Ureteric Epithelium	0	0.0303651	0.187575	0.00436524	0	0.0868189	0.02521	0.145561	0.0129346	0.0194062	0.135562	0.115166	0.0181426	0	0.01185	0.0734169	0.0534599	0	0.0222339	0	0.393355	0	0	0.517309	0	0.211496	0.207857	0.662494	0	0.150547	0.257434	0.247639	0.171533	0.0575499	0.00907404	0.012798	0.445787	0.291142	0.211652	0.0210821	0.0127069	0	0.0204319	0.158332	0.162994	0.066687	0.0839511	0.051507	0
Ureteric Epithelium/Collecting Duct	0.0361581	0.263281	1.60453	0.0122052	0.0148716	0.15368	0.0751923	0.544361	0.0445439	0	0.597983	0.228767	0.0406309	0	0.0812848	0.193158	0.109234	0.0737174	0.0172277	0	1.25962	0	0	0.375603	0	1.01369	0.359163	1.05198	0	1.07314	1.29845	0.540022	0.668673	0.407945	0.105302	0.0833546	1.01118	0.463027	0.558958	0.0543403	0.0745216	0.0353842	0.0279409	0.63509	0.169787	0.171929	0.0360908	0.198574	0.0472567
Vasculator/Endothelium	0.0673368	0.0167968	2.72834	0.0214199	0.0134664	0.256607	0.135191	1.41748	0.151827	0.0607191	0.710336	0.256146	0.0317019	0.00405229	0.0138047	0.0197315	0.0149383	0.0109898	0	0	0.500689	0	0	0.267092	0.0213883	0.938053	0.382302	1.39227	0.00467804	3.73782	3.62293	0.0754643	0.0812773	0.0812968	0.0288995	0.145223	1.36288	1.06021	0.263729	0.056902	0.35591	0.0140719	0.0286431	0.0759775	0.0235871	0.206225	0.187683	1.16989	0.00443641
[truncated: 118 more columns]
