# Supplementary material for: Kidney organoids recapitulate human basement membrane assembly in health and disease
Source: eLife. 2022 Jan 25;11:e73486. doi: 10.7554/eLife.73486 (PMC8849328; doi:10.7554/eLife.73486)
Supplement: Supplementary file 4. [file elife-73486-supp4.xlsx]

## Sheet: E19 mouse mature gloms (all)
Protein FDR Confidence: Combined	Master	Accession	Description	Exp. q-value: Combined	Sum PEP Score	Coverage [%]	# Peptides	# PSMs	# Unique Peptides	# AAs	MW [kDa]	calc. pI	Score Mascot: Mascot	Score Sequest HT: Sequest HT	# Peptides (by Search Engine): Mascot	# Peptides (by Search Engine): Sequest HT	Pfam IDs	Entrez Gene ID	Gene Symbol	Ensembl Gene ID	Abundances (Normalized): F1: Control, Control	Abundances (Normalized): F2: Control, Control	Abundances (Normalized): F3: Control, Control	Abundances (Normalized): F4: Control, Control	Abundance: F1: Control, Control	Abundance: F2: Control, Control	Abundance: F3: Control, Control	Abundance: F4: Control, Control	# Protein Groups	Modifications
High	Master Protein	A0A023J6I7	Cytochrome c oxidase subunit 2 [OS=Mus musculus castaneus]	0.006	2.171	3	1	4	1	227	26	4.73	28	1.65	1	1	Pf00116, Pf02790				899330	690800	277918	754552	632170	301605	159088	754552	1
High	Master Protein	A0A068BGR9	NADH dehydrogenase [OS=Mus musculus]	0	2.842	10	1	5	1	113	12.6	10.17	37	3.69	1	1	Pf07347	66416	Ndufa7		217935	438221	221872	173574	153194	191328	127006	173574	1
High	Master Protein	A0A087WP00	Nucleolar protein 58 [OS=Mus musculus]	0	5.913	7	1	8	1	195	21.4	9.76	35	6.17	1	1	Pf01798			ENSMUSG00000026020.9	383131	543973	120271	211612	269316	237500	68846.3	211612	1
High	Master Protein	A0A087WPW5	Kinectin [OS=Mus musculus]	0	7.837	2	2	16	2	1252	143.7	6.13	145	12.19	2	2	Pf04156, Pf05557, Pf09726, Pf12128	16709	Ktn1	ENSMUSG00000021843.16	272555	358365	116366	92563.4	191588	156463	66611.1	92563.4	1
High	Master Protein	A0A087WQ94	Tensin 1 [OS=Mus musculus]	0	8.303	1	2	16	2	1719	183.3	7.49	228	13.17	2	2	Pf00017, Pf08416, Pf10409			ENSMUSG00000055322.15	364716	1.38191e+06	396332	428667	256371	603344	226872	428667	1
High	Master Protein	A0A087WQS2	Basic leucine zipper and W2 domain-containing protein 1 [OS=Mus musculus]	0	12.779	6	3	11	3	451	51.2	6.95	130	10.32	3	3	Pf02020	66882	Bzw1	ENSMUSG00000051223.14	1.00396e+06	647076	647341	704515	705717	282515	370557	704515	1
High	Master Protein	A0A087WS46	eukaryotic translation elongation factor 1 beta 2 [OS=Mus musculus]	0	22.463	30	4	38	4	184	20.1	4.56	719	41.89	4	4	Pf00736			ENSMUSG00000025967.16	1.96615e+06	3.94215e+06	2.93984e+06	2.1843e+06	1.38207e+06	1.72116e+06	1.68285e+06	2.1843e+06	1
High	Master Protein	A0A087WS56	fibronectin [OS=Mus musculus]	0	234.716	24	42	401	42	2266	249.4	5.82	4045	423.13	42	42	Pf00039, Pf00040, Pf00041	14268	Fn1	ENSMUSG00000026193.15	3.42952e+07	7.51983e+07	2.55369e+07	2.50934e+07	2.41072e+07	3.28318e+07	1.46181e+07	2.50934e+07	1	Oxidation [P1279; K1543; P1544]
High	Master Protein	A0A087WS80	Phenylalanine--tRNA ligase beta subunit [OS=Mus musculus]	0	3.178	4	1	9	1	206	23.3	7.33	66	1.6	1	1				ENSMUSG00000026245.16	180971	358089	146123	115749	127211	156343	83645.1	115749	1
High	Master Protein	A0A097PUD0	anti-dectin-1 15E2 light chain [OS=Mus musculus]	0	44.526	29	4	46	4	235	25.6	8.31	876	60.63	4	4	Pf07654, Pf07686				1.7207e+07	525712	1.13844e+06	2.97138e+06	1.20954e+07	229527	651677	2.97138e+06	1
High	Master Protein	A0A097PUH2	anti-dectin-1 15E2 heavy chain [OS=Mus musculus]	0	8.416	4	2	10	2	469	51.6	7.94	88	9.92	2	2	Pf07654, Pf08205				1.97649e+07	457665	462850	1.47027e+06	1.38935e+07	199818	264949	1.47027e+06	1
High	Master Protein	A0A0A0MQM0	eukaryotic translation initiation factor 5A [OS=Mus musculus]	0	8.271	26	3	20	2	149	16.3	5	64	8.02	3	3	Pf01287	276770	Eif5a	ENSMUSG00000078812.10	1.35687e+06	1.5998e+06	1.2267e+06	947872	953791	698475	702196	947872	1	Oxidation [P74]
High	Master Protein	A0A0A1HAM8	80K protein [OS=Mus musculus]	0	14.142	11	2	7	2	309	29.7	4.34	87	10.31	2	2		17118	Marcks		328257	1.66878e+06	313900		230743	728595	179686		1
High	Master Protein	A0A0A6YXX6	Serine/arginine-rich-splicing factor 6 [OS=Mus musculus]	0.001	4.218	9	1	12	1	135	15.5	5.34	26	13.84	1	1	Pf00076, Pf03880, Pf13893, Pf14259			ENSMUSG00000016921.14	1.70985e+06	3.26214e+06	5.14974e+06	2.45576e+06	1.20191e+06	1.42426e+06	2.94786e+06	2.45576e+06	1
High	Master Protein	A0A0B4J1E2	SNW domain-containing protein 1 [OS=Mus musculus]	0.001	5.093	3	1	8	1	536	61.4	9.48	106	5.62	1	1	Pf02731	66354	Snw1	ENSMUSG00000021039.8	94957.6	210582	112638	87117.4	66749	91940.7	64477.4	87117.4	1
High	Master Protein	A0A0B6VJJ8	Kallikrein related-peptidase 5 [OS=Mus musculus]	0.001	4.482	7	1	40	1	293	31.8	7.55	25	2.11	1	1	Pf00089	68668	Klk5		4.82094e+06	8.6486e+06	1.19894e+07	6.18001e+06	3.38881e+06	3.776e+06	6.86309e+06	6.18001e+06	1	Oxidation [P142; P144; P149]
High	Master Protein	A0A0F7IQ06	alpha v integrin [OS=Mus musculus]	0	16.843	6	5	17	5	1044	115.2	5.68	86	6.31	4	5	Pf01839, Pf08441, Pf13517	16410	Itgav		1.24553e+06	1.48322e+06	670233	729716	875528	647578	383661	729716	1
High	Master Protein	A0A0G2JFY5	Far upstream element-binding protein 1 [OS=Mus musculus]	0	21.339	9	4	38	4	654	68.8	7.93	472	13.7	4	4	Pf00013, Pf07650, Pf13014	51886	Fubp1	ENSMUSG00000028034.15	889228	1.56311e+06	1.29773e+06	355658	625069	682456	742857	355658	1
High	Master Protein	A0A0G2JG10	Pre-mRNA-splicing factor ATP-dependent RNA helicase DHX15 [OS=Mus musculus]	0	9.755	2	1	6	1	608	68.5	6.8	142	6.99	1	1	Pf00270, Pf00271, Pf04408, Pf13401			ENSMUSG00000029169.11	111406	210606	121789	55706	78310.9	91951.3	69715.4	55706	1
High	Master Protein	A0A0H3XWX3	insulin-like growth factor 2 mRNA binding protein 1 dN CRDBP-2 [OS=Mus musculus]	0.001	4.352	3	1	13	1	441	47.9	9.48	70	5.99	1	1	Pf00013, Pf13014	140486	Igf2bp1		255733	495703	278684	241552	179764	216425	159527	241552	1
High	Master Protein	A0A0J9YTW3	C-terminal-binding protein 1 [OS=Mus musculus]	0	3.412	4	1	4	1	180	20	7.21	41	0	1	1	Pf00389, Pf02826			ENSMUSG00000037373.12	308123	238344	98423.3	222262	216590	104062	56340.3	222262	1
High	Master Protein	A0A0J9YUA3	Huntingtin-interacting protein 1 [OS=Mus musculus]	0.001	5.047	4	2	13	2	618	68.1	5	44	0	2	2	Pf00038, Pf01608, Pf09730, Pf12128	215114	Hip1	ENSMUSG00000039959.13	2.9347e+06	7.51394e+06	2.79857e+06	1.87987e+06	2.0629e+06	3.28061e+06	1.60198e+06	1.87987e+06	1
High	Master Protein	A0A0N4SV32	Plasminogen activator inhibitor 1 RNA-binding protein [OS=Mus musculus]	0	10.449	10	3	12	3	362	39.6	8.47	55	10.02	3	3	Pf04774			ENSMUSG00000036371.6	216960	1.0086e+06	276714	138770	152509	440356	158399	138770	1
High	Master Protein	A0A0N4SVG9	RAB7, member RAS oncogene family [OS=Mus musculus]	0	9.136	24	2	18	2	98	11	9.13	220	19.45	2	2	Pf00025, Pf00071, Pf01926, Pf03193, Pf03266, Pf04670, Pf08477, Pf13191, Pf13401			ENSMUSG00000079477.9	1.22711e+06	1.6272e+06	1.22817e+06	853200	862579	710441	703039	853200	1
High	Master Protein	A0A0N4SW94	myeloid-associated differentiation marker [OS=Mus musculus]	0	10.708	33	2	14	2	81	8.6	8.38	348	17.32	2	2				ENSMUSG00000068566.12	680823	1.32985e+06	285724	602389	478574	580618	163557	602389	1
High	Master Protein	A0A0R4J0Q5	Lamin-B2 [OS=Mus musculus]	0	21.333	10	8	51	4	615	69	5.55	252	17.81	8	8	Pf00038, Pf00932, Pf04156	16907	Lmnb2	ENSMUSG00000062075.13	757099	483330	281879	596962	532191	211023	161356	596962	1
High	Master Protein	A0A0R4J0Z1	Protein disulfide-isomerase A4 [OS=Mus musculus]	0	66.447	23	12	98	12	641	72.3	5.22	1333	84.99	12	12	Pf00085, Pf01216, Pf13098, Pf13848, Pf13905	12304	Pdia4	ENSMUSG00000025823.9	3.0761e+06	7.89146e+06	2.41107e+06	3.07965e+06	2.1623e+06	3.44543e+06	1.38016e+06	3.07965e+06	1
High	Master Protein	A0A0R4J1I6	Nuclear pore membrane glycoprotein 210 [OS=Mus musculus]	0.001	2.788	1	1	2	1	1842	199.4	6.6	0	1.74	1	1		54563	Nup210	ENSMUSG00000030091.17	193736	157198	171348	111783	136184	68632.9	98084.5	111783	1
High	Master Protein	A0A0U1RPD3	Nucleolysin TIAR [OS=Mus musculus]	0.001	3.713	5	1	6	1	244	26.9	8.75	43	5.11	1	1	Pf00076, Pf04847, Pf13893, Pf14259			ENSMUSG00000030846.15	132710	337558	287393	136697	93286.2	147379	164512	136697	1
High	Master Protein	A0A0U1RPS0	AP-2 complex subunit sigma [OS=Mus musculus]	0	2.882	12	1	8	1	60	7.1	7.42	58	7.04	1	1	Pf01217			ENSMUSG00000008036.11	591104	795713	473537	519328	415508	347411	271066	519328	1
High	Master Protein	A0A140LIM5	Mitotic checkpoint protein BUB3 [OS=Mus musculus]	0	7.8	22	3	14	3	184	20.8	6.38	60	6.16	3	3	Pf00400			ENSMUSG00000066979.6	572011	972302	597099	473537	402086	424510	341796	473537	1
High	Master Protein	A0A140LJG6	mCG7038, isoform CRA_a [OS=Mus musculus]	0.007	1.869	6	1	4	1	123	14.2	8.6	0	0	1	1	Pf06703			ENSMUSG00000035227.7	514728	874263	443979	264225	361820	381706	254146	264225	1
Medium	Master Protein	A0A140LJK5	glutamine--tRNA ligase [OS=Mus musculus]	0.019	1.375	5	1	2	1	182	20.3	8.13	0	0	1	1	Pf04557, Pf04558			ENSMUSG00000032604.16	1.28407e+06	1.30621e+06	701905	948383	902617	570297	401791	948383	1
High	Master Protein	A0A140T8T4	ribosomal protein L9, pseudogene 6 [OS=Mus musculus]	0	26.824	21	3	40	3	192	21.8	9.88	192	39.45	3	3	Pf00347	100042823	Rpl9-ps6	ENSMUSG00000062456.3	1.57065e+06	3.08249e+06	1.75354e+06	1.26443e+06	1.10407e+06	1.34582e+06	1.00377e+06	1.26443e+06	1
High	Master Protein	A0A171KXD3	protein arginine N-methyltransferase 1 [OS=Mus musculus]	0	18.009	11	3	34	3	318	36.5	6.19	363	36.96	3	3	Pf05175, Pf06325, Pf08241, Pf12847, Pf13489, Pf13649, Pf13847			ENSMUSG00000109324.1	746012	2.14263e+06	1.85692e+06	1.07254e+06	524398	935477	1.06296e+06	1.07254e+06	1
High	Master Protein	A0A1B0GR60	ferritin [OS=Mus musculus]	0.001	5.465	8	1	8	1	160	18	6.28	127	9.89	1	1	Pf00210			ENSMUSG00000050708.16	362559	470669	251813	229616	254855	205495	144145	229616	1
High	Master Protein	A0A1B0GS68	predicted gene 45713 [OS=Mus musculus]	0	19.745	9	4	46	4	446	50.8	10.23	679	58.94	4	4	Pf00572, Pf02947			ENSMUSG00000089989.10	8.86303e+06	1.25572e+07	6.85374e+06	6.18661e+06	6.23013e+06	5.48252e+06	3.92328e+06	6.18661e+06	1
High	Master Protein	A0A1B0GSR7	Keratin, type I cytoskeletal 10 [OS=Mus musculus]	0.002	2.544	10	1	2	1	97	9.3	8.48	17	0	1	1				ENSMUSG00000019761.10	240732	301097	179942	297751	169219	131460	103004	297751	1
High	Master Protein	A0A1C7CYU3	nucleobindin 1, isoform CRA_b [OS=Mus musculus]	0	7.701	5	2	13	2	455	53	5.07	71	3.46	2	2		18220	Nucb1	ENSMUSG00000030824.17	718352	465772	387127	300272	504955	203357	221603	300272	1
High	Master Protein	A0A1L1SQA8	40S ribosomal protein S25 [OS=Mus musculus]	0.001	4.176	10	1	8	1	93	10.3	9.99	91	8.71	1	1	Pf03297			ENSMUSG00000009927.9	684230	886775	917609	503411	480969	387168	525266	503411	1
High	Master Protein	A0A1L1STE4	Interleukin enhancer-binding factor 3 [OS=Mus musculus]	0	21.322	8	6	27	6	908	97.4	8.92	125	13.11	6	6	Pf00035, Pf07528, Pf14709	16201	Ilf3	ENSMUSG00000032178.14	1.30185e+06	2.5864e+06	1.38528e+06	1.12989e+06	915117	1.12923e+06	792975	1.12989e+06	1
High	Master Protein	A0A1L1STE6	Isocitrate dehydrogenase [NAD] subunit, mitochondrial [OS=Mus musculus]	0.007	2.043	3	1	3	1	384	41.5	6.93	0	1.78	1	1	Pf00180			ENSMUSG00000032279.11	2.33455e+06	2.68545e+06	2.66545e+06	2243210	1.64104e+06	1.17248e+06	1525780	2243210	1
High	Master Protein	A0A1L1SV25	Alpha-actinin-4 [OS=Mus musculus]	0	138.924	30	21	243	9	932	107	5.36	3949	282.89	21	21	Pf00307, Pf00435, Pf08726, Pf11971, Pf13499, Pf13833			ENSMUSG00000054808.15	1.66141e+07	3.74353e+07	1.12303e+07	1.86367e+07	1.16786e+07	1.63443e+07	6.42852e+06	1.86367e+07	1
High	Master Protein	A0A1L1SVG6	Choline transporter-like protein 2 [OS=Mus musculus]	0.001	4.043	2	1	5	1	554	62.6	8.21	36	4.02	1	1	Pf04515			ENSMUSG00000057193.8	620271	714319	472170	447905	436010	311874	270284	447905	1
High	Master Protein	A0A1S6GWH5	Uncharacterized protein [OS=Mus musculus]	0	74.038	12	10	114	10	1118	124.2	5.99	1611	141.72	10	10	Pf00899, Pf02134, Pf09358, Pf10585	22201	Uba1		4.13379e+06	9.30769e+06	4.12369e+06	4.48138e+06	2.90578e+06	4.06376e+06	2.36052e+06	4.48138e+06	1	Oxidation [P601; P1074]
High	Master Protein	A0A1S6GWI0	NADH dehydrogenase (Ubiquinone) 1 alpha subcomplex, 8 [OS=Mus musculus]	0.001	5.193	8	1	4	1	206	23.8	9.14	24	2.39	1	1	Pf06747	68375	Ndufa8		114154	361953	130150	104398	80243	158030	74501.6	104398	1
High	Master Protein	A0A1W2P6G5	Myosin light polypeptide 6 [OS=Mus musculus]	0	19.578	35	4	44	4	139	15.4	4.54	637	46.68	4	4	Pf13499			ENSMUSG00000090841.2	5.71505e+06	8.84465e+06	3.37969e+06	3.58816e+06	4.01731e+06	3.8616e+06	1.93463e+06	3.58816e+06	1
High	Master Protein	A0A1W2P729	Protein canopy homolog 2 [OS=Mus musculus]	0	7.286	12	1	12	1	136	15.3	5.58	197	11.56	1	1	Pf11938			ENSMUSG00000025381.3	141189	273551	382439	195440	99247	119433	218919	195440	1
High	Master Protein	A0PJB8	H2afy2 protein [OS=Mus musculus]	0.001	3.721	14	2	6	2	192	20.8	6.11	0	0	2	2	Pf01661	404634	H2afy2		243372	396536	227264	120118	171074	173129	130093	120118	1
High	Master Protein	A1BN54	Alpha actinin 1a [OS=Mus musculus]	0	60.248	15	11	96	4	887	102.7	5.48	1006	96.09	11	11	Pf00307, Pf00435, Pf08726, Pf11971, Pf13499, Pf13833	109711	Actn1	ENSMUSG00000015143.15	419925	1.28024e+06	253951	523083	295180	558956	145369	523083	1
High	Master Protein	A2A432-1	Cullin-4B [OS=Mus musculus]	0	3.015	1	1	2	1	970	110.6	8.37	20	0	1	1	Pf00888, Pf10557	72584	Cul4b	ENSMUSG00000031095.15	98130.7	183836	109342		68979.5	80263.4	62590.7		1
High	Master Protein	A2A513	Keratin, type I cytoskeletal 10 [OS=Mus musculus]	0	101.44	20	15	844	11	561	57	5.07	13778	963.66	15	15	Pf00038	16661	Krt10	ENSMUSG00000019761.10	1.2313e+09	5.78237e+08	1.15271e+09	1.32524e+09	8.65523e+08	2.5246e+08	6.59846e+08	1.32524e+09	1
High	Master Protein	A2A702	Eukaryotic translation initiation factor 3 subunit M [OS=Mus musculus]	0	2.981	4	1	2	1	242	27.9	7.17	15	0	1	1	Pf01399	98221	Eif3m	ENSMUSG00000027170.12	791113	1.07992e+06	626680	538874	556101	471495	358730	538874	1
High	Master Protein	A2A816	protein/nucleic acid deglycase DJ-1 [OS=Mus musculus]	0	10.897	29	3	21	3	125	12.7	6.05	90	9.68	3	3	Pf01965, Pf13278	57320	Park7	ENSMUSG00000028964.14	1.39986e+06	2.06468e+06	1.42791e+06	1.46933e+06	984010	901446	817377	1.46933e+06	1
High	Master Protein	A2AEX6	Four and a half LIM domains protein 1 [OS=Mus musculus]	0.001	5.236	4	1	4	1	309	35.1	8.44	55	4.51	1	1	Pf00412	14199	Fhl1	ENSMUSG00000023092.16	260338	499298	212088	137655	183000	217995	121405	137655	1
High	Master Protein	A2AKV1	ATP synthase subunit gamma, mitochondrial [OS=Mus musculus]	0	15.18	28	4	37	4	154	16.8	9.89	229	30.65	4	4	Pf00231	11949	Atp5c1	ENSMUSG00000025781.14	1.3786e+06	3.1954e+06	2.00767e+06	2.21024e+06	969064	1.39512e+06	1.14925e+06	2.21024e+06	1
Medium	Master Protein	A2AMI7	Eukaryotic translation initiation factor 4 gamma 3 [OS=Mus musculus]	0.015	1.557	1	1	2	1	1002	113.1	5.71	20	0	1	1	Pf02020, Pf02847, Pf02854	230861	Eif4g3	ENSMUSG00000028760.16	51912	112561		72106.3	36490.7	49144.3		72106.3	1	Oxidation [K395]
High	Master Protein	A2ARA8-1	Integrin alpha-8 [OS=Mus musculus]	0	10.834	2	2	6	2	1062	117.5	6.16	51	4.43	2	2	Pf00357, Pf01839, Pf08441, Pf13517	241226	Itga8	ENSMUSG00000026768.10	697230	1.0791e+06	313404	520922	490107	471138	179401	520922	1
High	Master Protein	A2ARV4	Low-density lipoprotein receptor-related protein 2 [OS=Mus musculus]	0	6.967	1	3	6	3	4660	518.9	5.15	17	4.01	3	3	Pf00057, Pf00058, Pf07645, Pf12662, Pf14670	14725	Lrp2	ENSMUSG00000027070.14	141005	252658	251610	267165	99116.9	110311	144029	267165	1
High	Master Protein	A2ASQ1-1	Agrin [OS=Mus musculus]	0	49.815	7	9	82	9	1950	207.4	6.32	1037	71.97	9	9	Pf00008, Pf00050, Pf00053, Pf00054, Pf01390, Pf02210, Pf03137, Pf07648	11603	Agrn	ENSMUSG00000041936.18	1.63826e+06	5.04581e+06	1.34301e+06	1.52548e+06	1.15159e+06	2.20301e+06	768778	1.52548e+06	1
High	Master Protein	A2AVJ7	Ribosome-binding protein 1 [OS=Mus musculus]	0	28.594	6	8	34	8	1464	158.3	9.19	175	20.26	8	8	Pf00038, Pf03276, Pf03962, Pf04111, Pf04156, Pf05104, Pf08317, Pf09606, Pf09726, Pf10186, Pf12128, Pf13779	81910	Rrbp1	ENSMUSG00000027422.15	1.51863e+06	2.90683e+06	486607	1.05148e+06	1.0675e+06	1.26913e+06	278548	1.05148e+06	1
High	Master Protein	A2BDX3	Adenylyltransferase and sulfurtransferase MOCS3 [OS=Mus musculus]	0	3.39	2	1	59	1	460	49.3	7.49	498	5.4	1	1	Pf00581, Pf00899, Pf05237	69372	Mocs3	ENSMUSG00000074576.4	1.54185e+06	2.80172e+06	3.05339e+06	934736	1.08382e+06	1.22324e+06	1.74785e+06	934736	1
High	Master Protein	A2BGG7	Nuclease-sensitive element-binding protein 1 [OS=Mus musculus]	0	6.259	23	2	9	2	214	24.7	10.1	42	5.49	2	2		22608	Ybx1	ENSMUSG00000028639.14	167037	543099	283491	152320	117416	237118	162279	152320	1
High	Master Protein	A7E215	Rps6ka3 protein [OS=Mus musculus]	0.006	2.179	2	1	4	1	741	83.6	6.89	18	0	1	1	Pf00069, Pf00433, Pf07714, Pf14531	110651	Rps6ka3		63830.4	141079		72220	44868.6	61595.5		72220	1
High	Master Protein	A8DUK7	beta-globin [OS=Mus musculus]	0	136.623	82	10	268	1	147	15.7	7.69	5308	391.19	10	9	Pf00042				2.11555e+07	5.22232e+07	1.47709e+07	1.96635e+07	1.48709e+07	2.28008e+07	8.45527e+06	1.96635e+07	1	Oxidation [P37; K60]
High	Master Protein	A8DUL5	beta-globin [OS=Mus musculus]	0	123.677	73	9	267	1	147	15.7	8.07	5738	397	9	7	Pf00042				5.44487e+06		4.66746e+06	5.37293e+06	3827386		2.67179e+06	5.37293e+06	1	Oxidation [P37; K60; P125]
High	Master Protein	B0QZN5	Vesicle-associated membrane protein 2 [OS=Mus musculus]	0	8.704	10	1	10	1	163	17.9	9.38	184	15.97	1	1	Pf00957	22318	Vamp2	ENSMUSG00000020894.16	520068	877845	455328	428734	365573	383270	260643	428734	1
High	Master Protein	B1AU76	Nuclear autoantigenic sperm protein [OS=Mus musculus]	0.001	4.115	3	1	8	1	448	48.7	4.45	33	3.5	1	1	Pf10516, Pf13414, Pf13424	50927	Nasp	ENSMUSG00000028693.15	167154	232970	103937	137734	117498	101715	59496.5	137734	1
High	Master Protein	B1B0C7	Basement membrane-specific heparan sulfate proteoglycan core protein [OS=Mus musculus]	0	126.077	8	25	171	5	4375	468.7	6.48	1630	131.85	25	25	Pf00008, Pf00047, Pf00052, Pf00053, Pf00054, Pf00057, Pf02210, Pf07679, Pf07686, Pf12785, Pf13385, Pf13895, Pf13927	15530	Hspg2	ENSMUSG00000028763.17	8.54728e+06	1.62529e+07	5.94641e+06	7.40777e+06	6.00817e+06	7.09607e+06	3.4039e+06	7.40777e+06	1
Medium	Master Protein	B2RXQ2	Ppfia1 protein [OS=Mus musculus]	0.012	1.648	1	1	13	1	1266	142.6	6.25	23	1.84	1	1	Pf00536, Pf01576, Pf02463, Pf04012, Pf04111, Pf04156, Pf05622, Pf06637, Pf07647, Pf09726, Pf09731, Pf12128, Pf13514, Pf13851, Pf14915, Pf15619	233977	Ppfia1	ENSMUSG00000037519.17	1.25279e+06	714244	701241	576739	880630	311841	401410	576739	1	Oxidation [P591; K593]
High	Master Protein	B7ZP22	heterogeneous nuclear ribonucleoprotein A2/B1 [OS=Mus musculus]	0	112	50	12	202	11	341	35.9	8.65	3620	264.26	10	11	Pf00076, Pf13893, Pf14259	53379	Hnrnpa2b1		2.06349e+07	3.94014e+07	2.28693e+07	1.75071e+07	1.4505e+07	1.72027e+07	1.30911e+07	1.75071e+07	1	Oxidation [P318]
High	Master Protein	B9EIU1	glutamyl-prolyl-tRNA synthetase [OS=Mus musculus]	0	5.758	1	2	8	2	1512	169.9	7.59	73	3.65	2	2	Pf00458, Pf00587, Pf00749, Pf01406, Pf03129, Pf03950, Pf09180, Pf14497	107508	Eprs		308866	343599	156068	263629	217113	150016	89337.9	263629	1
High	Master Protein	B9EJ35	Protease, serine, 3 [OS=Mus musculus]	0	11.31	4	1	148	1	246	26.1	4.92	3567	143.92	1	1	Pf00089	22073	Prss3		1.01227e+09	1.60905e+09	1.36557e+09	8.01291e+08	7.11561e+08	7.02517e+08	7.81692e+08	8.01291e+08	1
High	Master Protein	B9EKB0	laminin B1 subunit 1 [OS=Mus musculus]	0	33.076	5	9	38	9	1834	202.3	5.01	310	22.35	9	9	Pf00038, Pf00053, Pf00055, Pf01442, Pf01576, Pf05557, Pf05698, Pf06008, Pf07111, Pf08317, Pf08647, Pf09731, Pf13476, Pf13868, Pf15346	16777	Lamb1		1.63935e+06	5.29513e+06	1.62041e+06	1.71195e+06	1.15236e+06	2.31187e+06	927567	1.71195e+06	1
High	Master Protein	B9EKB8	insulin-like growth factor 2 receptor [OS=Mus musculus]	0	16.843	1	3	16	3	2483	273.6	5.68	176	13.52	3	3	Pf00040, Pf00878, Pf02157, Pf09451	16004	Igf2r		147464	2.20835e+06	160003	1.25442e+06	103658	964171	91590.3	1.25442e+06	1
High	Master Protein	B9EKE9	Ddx3x protein [OS=Mus musculus]	0	23.921	11	7	21	6	661	73	7.18	184	13.85	6	7	Pf00270, Pf00271, Pf04851	13205	Ddx3x		1.19444e+06	3.02385e+06	1.44761e+06	1.67632e+06	839615	1.32022e+06	828651	1.67632e+06	1
High	Master Protein	B9EKP5	Filamin, alpha [OS=Mus musculus]	0	262.575	24	48	349	46	2639	280.3	6.01	3573	342.04	47	48	Pf00307, Pf00630	192176	Flna		2.17121e+07	5.58473e+07	2.04795e+07	4.15406e+07	1.52622e+07	2.43831e+07	1.1723e+07	4.15406e+07	1	Oxidation [P1460]
High	Master Protein	C6EQH3	Succinate--CoA ligase [GDP-forming] subunit beta, mitochondrial [OS=Mus musculus]	0	10.386	7	2	12	2	414	44.8	6.01	230	12.2	2	2	Pf00549, Pf01071, Pf08442, Pf13549	20917	Suclg2		326829	467047	277452	238168	229739	203914	158821	238168	1
High	Master Protein	D3YTK7	Basal cell adhesion molecule [OS=Mus musculus]	0	6.773	10	2	16	2	193	21	5.36	124	5.25	2	2	Pf07679, Pf08205			ENSMUSG00000002980.14		545423	162674	139249		238133	93119.4	139249	1
High	Master Protein	D3YTN4	GTPase IMAP family member 4 [OS=Mus musculus]	0	13.074	9	3	14	3	328	38	6.23	126	5.94	3	3	Pf01926, Pf04548	107526	Gimap4	ENSMUSG00000054435.16	784668	1.02365e+06	308286	738758	551570	446930	176472	738758	1
High	Master Protein	D3YUT3	40S ribosomal protein S19 [OS=Mus musculus]	0.002	2.712	7	1	4	1	133	14.9	10.35	29	4.13	1	1	Pf01090			ENSMUSG00000040952.16	2.17844e+06	5.4626e+06	3.48756e+06	1939449	1.5313e+06	2.38499e+06	1.99638e+06	1939449	1
High	Master Protein	D3YWF6	Ubiquitin thioesterase otub1 [OS=Mus musculus]	0	14.864	15	3	24	3	241	28	5.29	334	17.62	3	3	Pf02338, Pf10275			ENSMUSG00000024767.11	218923	1.03214e+06	314378	589141	153889	450634	179959	589141	1
High	Master Protein	D3YWR7	dihydropteridine reductase [OS=Mus musculus]	0	17.741	24	3	12	3	189	20	6.92	134	9.94	3	3				ENSMUSG00000015806.12	749866	1.31496e+06	823168	685472	527107	574115	471205	685472	1
High	Master Protein	D3YWT0	Signal peptidase complex catalytic subunit SEC11 [OS=Mus musculus]	0.001	4.217	5	1	4	1	170	19.6	9.48	89	5.23	1	1	Pf00717			ENSMUSG00000025724.12	543323	740365	491622	366536	381921	323245	281419	366536	1
High	Master Protein	D3YYE1	Acidic leucine-rich nuclear phosphoprotein 32 family member A [OS=Mus musculus]	0	13.411	19	4	24	1	198	22.9	4.37	139	22.28	3	4	Pf12799, Pf13855, Pf14580			ENSMUSG00000032249.14	130928	316951	396327	224543	92033.9	138382	226869	224543	1
Medium	Master Protein	D3YYF1	adhesion G protein-coupled receptor V1 [OS=Mus musculus]	0.013	1.602	1	1	10	1	1218	133.6	4.63	0	6.63	1	1	Pf03160			ENSMUSG00000069170.13	8.91633e+06	3.52311e+06	7.96209e+06	5636891	6267599	1.5382e+06	4557730	5636891	1
High	Master Protein	D3Z124	DNA-(apurinic or apyrimidinic site) lyase [OS=Mus musculus]	0	8.641	8	1	5	1	177	19.3	5.5	41	3.02	1	1	Pf03372			ENSMUSG00000035960.13	133115	144808	202185		93571	63223.6	115737		1
High	Master Protein	D3Z1M1	Guanine nucleotide-binding protein G(I)/G(S)/G(T) subunit beta-2 [OS=Mus musculus]	0	17.995	15	3	34	1	227	25	7.34	567	39.77	3	3	Pf00400			ENSMUSG00000029713.15	856665	2.28519e+06	790701	849059	602179	997721	452620	849059	1
High	Master Protein	D3Z1S8	40S ribosomal protein S5 [OS=Mus musculus]	0	18.553	14	4	38	4	189	21.1	9.52	410	48.89	4	4	Pf00177			ENSMUSG00000012848.15	3.13536e+06	4.62793e+06	3.94701e+06	2.51858e+06	2.20395e+06	2.02057e+06	2.25938e+06	2.51858e+06	1
High	Master Protein	D3Z1V4	phosphatidylethanolamine-binding protein 1 [OS=Mus musculus]	0	3.534	4	1	6	1	209	23	4.98	32	0	1	1	Pf01161			ENSMUSG00000032959.12	541152	308189	180944	319790	380395	134556	103577	319790	1
High	Master Protein	D3Z383	mesoderm specific transcript, isoform CRA_a [OS=Mus musculus]	0	6.581	6	2	8	2	342	39.5	9.5	66	7.31	2	2	Pf00561, Pf06342, Pf12695, Pf12697	17294	Mest	ENSMUSG00000051855.15	2.77638e+06	4.70662e+06	2.68583e+06	2.34219e+06	1.95161e+06	2.05492e+06	1.53744e+06	2.34219e+06	1
High	Master Protein	D3Z3N4	Heterogeneous nuclear ribonucleoprotein H3 [OS=Mus musculus]	0.002	2.619	3	1	6	1	346	36.8	6.87	40	3.38	1	1	Pf00076, Pf14259	432467	Hnrnph3	ENSMUSG00000020069.16	235940	133369	77214.7	146276	165851	58229.3	44199.9	146276	1
High	Master Protein	D3Z4D3	Nephronectin [OS=Mus musculus]	0	10.542	5	2	10	2	532	58.1	8.59	106	10.5	2	2	Pf00629, Pf07645, Pf12662, Pf12947			ENSMUSG00000040998.18	294132	779673	251827	247504	206755	340407	144153	247504	1
High	Master Protein	D3Z4W5	RIKEN cDNA 1700074P13 gene [OS=Mus musculus]	0.001	5.485	4	1	82	1	176	20.1	5.06	1054	94.04	1	1	Pf00089			ENSMUSG00000029883.12	5.37322e+07	4.92499e+07	3.40407e+07	2.29094e+07	37770203	2.15027e+07	19485909	2.29094e+07	1
High	Master Protein	D3Z5B1	Zinc finger, BED type-containing 5 [OS=Mus musculus]	0.007	1.941	7	1	1	1	183	19.2	8.28	19		1		Pf06747			ENSMUSG00000034173.13	72300.6	185188		68025.7	50822.6	80853.7		68025.7	1
High	Master Protein	D3Z7C6	Prostaglandin E synthase 3 [OS=Mus musculus]	0	12.106	22	3	18	3	130	15	4.79	166	11.46	3	3	Pf04969			ENSMUSG00000071072.12	2.80743e+06	3.32189e+06	2.10641e+06	2.36653e+06	1.97344e+06	1.45035e+06	1.20577e+06	2.36653e+06	1
High	Master Protein	D6RFU9	synaptophysin-like protein [OS=Mus musculus]	0.001	4.556	11	1	8	1	79	8.9	9.29	70	3.52	1	1				ENSMUSG00000020570.15	194177	283028	100454	130968	136493	123571	57502.7	130968	1
High	Master Protein	D9J301	ENH isoform 1d [OS=Mus musculus]	0.005	2.399	2	1	2	1	574	61.8	7.91	0	0	1	1	Pf00412, Pf00595	56376	Pdlim5	ENSMUSG00000028273.15		285058	92640.2	87177.8		124457	53029.9	87177.8	1
High	Master Protein	E0CXN5	Glycerol-3-phosphate dehydrogenase [NAD(+)] [OS=Mus musculus]	0.001	5.109	9	2	8	2	326	35.2	7.59	32	2.09	2	2	Pf01210, Pf07479			ENSMUSG00000023019.12	330384	978732	303431	443001	232238	427317	173693	443001	1
High	Master Protein	E0CYQ2	NudC domain-containing protein 2 [OS=Mus musculus]	0.001	3.909	8	1	6	1	132	14.7	4.68	62	1.71	1	1	Pf04969	52653	Nudcd2	ENSMUSG00000020328.10	144982	125604	84932.2	122172	101913	54838.9	48617.6	122172	1
High	Master Protein	E0CZ90	proteasome activator complex subunit 2 [OS=Mus musculus]	0	13.072	16	2	18	2	165	18.7	4.88	205	13.75	2	2	Pf02251, Pf02252			ENSMUSG00000079197.10	464298	601910	152463	292967	326371	262796	87274.3	292967	1
High	Master Protein	E0CZH6	Mitochondrial amidoxime reducing component 2 [OS=Mus musculus]	0.002	2.613	5	1	4	1	190	21.7	5.67	24	1.65	1	1	Pf03473, Pf03476			ENSMUSG00000073481.9	183158	417699		140995	128748	182368		140995	1
High	Master Protein	E9PV24	Fibrinogen alpha chain [OS=Mus musculus]	0	21.815	8	6	35	6	789	87.4	6.11	523	38.75	6	6	Pf00147, Pf08702, Pf12160	14161	Fga	ENSMUSG00000028001.16	4.75375e+06	8.68049e+06	1.80046e+06	2.58233e+06	3.34158e+06	3.78993e+06	1.03064e+06	2.58233e+06	1
Medium	Master Protein	E9PWL1	Voltage-dependent T-type calcium channel subunit alpha [OS=Mus musculus]	0.022	1.255	1	1	2	1	2272	251.3	7.12	0		1		Pf00520, Pf08016	12291	Cacna1g	ENSMUSG00000020866.17	880370	3.13319e+06	3.33203e+06	1.41177e+06	618843	1.36796e+06	1.90735e+06	1.41177e+06	1	Oxidation [P597; P598; P599]
High	Master Protein	E9PXX7	Thioredoxin domain-containing protein 5 [OS=Mus musculus]	0	9.489	5	1	12	1	344	38.5	5.39	358	15.58	1	1	Pf00085, Pf07449, Pf13098, Pf13905	105245	Txndc5	ENSMUSG00000038991.16	127505	358921	157557	134869	89627.9	156706	90190.3	134869	1
High	Master Protein	E9PY26	bleomycin hydrolase [OS=Mus musculus]	0	6.257	7	2	4	2	179	20.9	8.51	51	2.05	2	2	Pf03051			ENSMUSG00000020840.10	715831	253082	350241	437634	503183	110496	200488	437634	1
High	Master Protein	E9PY39	predicted gene 20431 [OS=Mus musculus]	0.001	4.107	7	2	5	2	371	42.1	6.76	28	0	2	2	Pf00179, Pf10520			ENSMUSG00000089739.2	380516	705023	289057	363108	267478	307815	165465	363108	1
High	Master Protein	E9PYD5	Transcription elongation factor A protein 1 [OS=Mus musculus]	0.005	2.42	3	1	4	1	312	35	7.78	37	0	1	1	Pf01096, Pf07500, Pf08711	21399	Tcea1	ENSMUSG00000033813.15	87418.1	190801	70508.8	51230.6	61449.2	83304.3	40361.3	51230.6	1
High	Master Protein	E9PZF0	Nucleoside diphosphate kinase [OS=Mus musculus]	0	38.627	37	5	103	5	267	30.2	8.72	744	105.57	5	5	Pf00334			ENSMUSG00000091228.1	7.79044e+06	1.31942e+07	8.4685e+06	6.7751e+06	5.47617e+06	5.76063e+06	4.84762e+06	6.7751e+06	1
High	Master Protein	E9PZF5	Acidic leucine-rich nuclear phosphoprotein 32 family member E [OS=Mus musculus]	0.001	4.904	16	2	11	2	171	19.2	3.8	29	1.76	2	2	Pf12799, Pf13855, Pf14580			ENSMUSG00000015749.12		336136	280767	182117		146758	160719	182117	1
High	Master Protein	E9Q0B5	Fc fragment of IgG-binding protein [OS=Mus musculus]	0.007	1.897	0	1	28	1	2583	275	5.03	34	22.51	1	1	Pf00094, Pf01826, Pf08742, Pf12714			ENSMUSG00000047730.17	3.42374e+08	1.97815e+08	3.01538e+08	312737952	240666800	86366456	172609104	312737952	1
High	Master Protein	E9Q0U7	Heat shock protein 105 kDa [OS=Mus musculus]	0	8.218	3	2	9	1	817	91.6	5.59	71	3.11	2	2	Pf00012			ENSMUSG00000029657.15		375314	101019	79496.1		163863	57826.2	79496.1	1
Medium	Master Protein	E9Q166	ATPase family, AAA domain-containing 2B [OS=Mus musculus]	0.022	1.215	1	1	1	1	1460	164.6	6.96	0		1		Pf00004, Pf00439, Pf07724, Pf13191, Pf13401	320817	Atad2b	ENSMUSG00000052812.5	88406.8		189142	191248	62144.2		108270	191248	1	Oxidation [P86]
High	Master Protein	E9Q1G8	Septin-7 [OS=Mus musculus]	0	27.404	19	8	37	7	437	50.6	8.57	260	22.97	7	8	Pf00735, Pf01926, Pf05368	235072	Sept7	ENSMUSG00000001833.17	2.10257e+06	3.31317e+06	1.30666e+06	1.57646e+06	1.47797e+06	1.44654e+06	747968	1.57646e+06	1
High	Master Protein	E9Q1S3	protein transport protein Sec23A [OS=Mus musculus]	0.001	4.152	1	1	8	1	736	82.9	7.46	75	6.21	1	1	Pf00626, Pf04810, Pf04811, Pf04815, Pf08033			ENSMUSG00000020986.13	222748	459072	361865	203665	156577	200432	207142	203665	1
High	Master Protein	E9Q1Y9	Keratin 83 [OS=Mus musculus]	0	55.75	19	12	142	3	479	52.8	5.74	804	122.22	12	11	Pf00038, Pf01576, Pf05557, Pf05911, Pf07888, Pf07926, Pf11559, Pf13514	100126226	5430421N21Rik; Krt83	ENSMUSG00000067613.5	1.08118e+08	1.00151e+08	2.31388e+08	1.14588e+08	7.6e+07	4.37261e+07	1.32453e+08	1.14588e+08	1	Oxidation [K210; K211]
High	Master Protein	E9Q1Z0	keratin 90 [OS=Mus musculus]	0	125.135	19	16	404	2	538	58.2	8.25	3917	451.51	15	16	Pf00038, Pf01576, Pf04111, Pf06810, Pf09728, Pf12128, Pf13166, Pf13514	239673	4732456N10Rik; Krt90	ENSMUSG00000048699.4	1.10904e+07	7.07718e+06	1.44079e+07	1.42162e+07	7.79581e+06	3.08992e+06	8.24747e+06	1.42162e+07	1	Oxidation [K228; K259; K337]
Medium	Master Protein	E9Q3P4	Centromere protein F [OS=Mus musculus]	0.016	1.492	0	1	7	1	2997	342.3	5.16	41	1.61	1	1	Pf01496, Pf01576, Pf02463, Pf04111, Pf05557, Pf10473, Pf10481, Pf10490, Pf12128, Pf13166	108000	Cenpf	ENSMUSG00000026605.14	737360		575384	595009	518316		329366	595009	1
High	Master Protein	E9Q405	Unconventional myosin-XVIIIa [OS=Mus musculus]	0.001	4.248	1	1	8	1	1700	193.5	5.77	72	1.92	1	1	Pf00038, Pf00063, Pf00769, Pf01496, Pf01576, Pf02463, Pf02841, Pf03962, Pf04111, Pf04156, Pf04502, Pf05483, Pf05557, Pf05622, Pf05667, Pf05701, Pf05911, Pf06160, Pf07111, Pf07888, Pf09726, Pf09728, Pf09730, Pf09787, Pf10174, Pf12128, Pf13166, Pf13514, Pf13851, Pf15397	360013	Myo18a	ENSMUSG00000000631.20	88935.1	169300		68036.4	62515.5	73916.6		68036.4	1
High	Master Protein	E9Q450	Tropomyosin alpha-1 chain [OS=Mus musculus]	0	59.969	25	10	81	1	284	32.8	4.78	1032	90.28	10	10	Pf00261, Pf12718	22003	Tpm1	ENSMUSG00000032366.15	2.60353e+06	4.58895e+06	2.39775e+06	1.69968e+06	1.83011e+06	2.00355e+06	1.37254e+06	1.69968e+06	1
High	Master Protein	E9Q4F4	small nuclear ribonucleoprotein E [OS=Mus musculus]	0.001	4.634	12	1	10	1	91	10.9	8.48	150	11.57	1	1	Pf01423			ENSMUSG00000090553.8	866840	1.42057e+06	939914	313458	609332	620224	538034	313458	1
High	Master Protein	E9Q557	Desmoplakin [OS=Mus musculus]	0	254.449	18	51	555	51	2883	332.7	6.8	4703	493.78	51	50	Pf00038, Pf00681, Pf01576, Pf02463, Pf04111, Pf04156, Pf05483, Pf05557, Pf05622, Pf06637, Pf06705, Pf07888, Pf10174, Pf12128	109620	Dsp	ENSMUSG00000054889.9	8.03107e+07	4.89027e+07	1.08133e+08	6.25839e+07	5.64532e+07	2.13511e+07	6.18983e+07	6.25839e+07	1
High	Master Protein	E9Q5F6	Polyubiquitin-C [OS=Mus musculus]	0	43.46	64	6	90	6	201	22.6	7.4	1344	110.74	6	6	Pf00240, Pf11976, Pf13019, Pf13881, Pf14560			ENSMUSG00000008348.9	5.8183e+07	6.38957e+07	5.57567e+07	4.15891e+07	4.08988e+07	2.7897e+07	3.19167e+07	4.15891e+07	1
Medium	Master Protein	E9Q5Z7	FRAS1-related extracellular matrix protein 1 [OS=Mus musculus]	0.015	1.584	0	1	2	1	2173	242.5	6.39	16	0	1	1	Pf00059, Pf03160			ENSMUSG00000059049.14	74820.4	135226	82651	64946.7	52593.9	59039.9	47311.9	64946.7	1
High	Master Protein	E9Q616	AHNAK nucleoprotein (desmoyokin) [OS=Mus musculus]	0	9.864	3	3	26	3	5656	603.9	6.3	106	12.3	3	3		66395	Ahnak	ENSMUSG00000069833.12	801037	1.37344e+06	86469.6	264445	563076	599647	49497.7	264445	1
High	Master Protein	E9Q715	Putative RNA-binding protein Luc7-like 2 [OS=Mus musculus]	0	8.244	6	1	4	1	272	32.6	10.01	80	4.49	1	1	Pf03194	192196	Luc7l2	ENSMUSG00000029823.16	106885	265449	158709	64377.6	75133.1	115896	90849.8	64377.6	1
High	Master Protein	E9Q7G0	nuclear mitotic apparatus protein 1 [OS=Mus musculus]	0	12.538	2	3	20	3	2094	235.5	5.87	141	11.85	3	3	Pf04111, Pf09726, Pf12128, Pf14992	101706	Numa1	ENSMUSG00000066306.13	247770	613156	168761	258294	174166	267705	96603.7	258294	1
High	Master Protein	E9Q7G1	Transmembrane p24-trafficking protein 7 [OS=Mus musculus]	0	5.833	6	1	12	1	188	21.3	6.2	204	18.47	1	1	Pf01105			ENSMUSG00000033184.14	262432	461121	248461	241789	184473	201327	142226	241789	1
High	Master Protein	E9Q905	Catenin delta-1 [OS=Mus musculus]	0	8.133	3	2	14	2	866	96.6	6.24	148	11.42	2	2	Pf00514	12388	Ctnnd1	ENSMUSG00000034101.14	392297	1.05266e+06	369285	318090	275759	459595	211389	318090	1
High	Master Protein	E9QAZ2	ribosomal protein L15 [OS=Mus musculus]	0	14.524	15	3	36	3	204	24.1	11.58	429	40.29	3	3	Pf00827			ENSMUSG00000057262.1	5.79783e+06	7.18025e+06	4.2088e+06	3.62391e+06	4.07549e+06	3.13492e+06	2.40924e+06	3.62391e+06	1
High	Master Protein	E9QM38	Solute carrier family 12 member 2 [OS=Mus musculus]	0.006	2.175	1	1	2	1	1206	130.6	6.52	15	0	1	1	Pf00324, Pf08403, Pf13520	20496	Slc12a2	ENSMUSG00000024597.10	160526	391663		225285	112839	171001		225285	1
High	Master Protein	E9QNN1	Atp-dependent rna helicase a [OS=Mus musculus]	0	42.314	7	9	75	9	1384	149.6	6.83	858	65.68	8	9	Pf00035, Pf00270, Pf00271, Pf04408, Pf07717	13211	Dhx9	ENSMUSG00000042699.11	3.07765e+06	5.46657e+06	3.50359e+06	2.62833e+06	2.16339e+06	2.38672e+06	2.00556e+06	2.62833e+06	1
High	Master Protein	E9QNR5	Thrombospondin type-1 domain-containing protein 7A [OS=Mus musculus]	0	7.388	2	3	10	3	1646	183.5	7.2	33	5.84	3	3	Pf00090	330267	Thsd7a	ENSMUSG00000032625.14	313680	870049	250286	318886	220496	379866	143271	318886	1
High	Master Protein	E9QP00	Transformer-2 protein homolog alpha [OS=Mus musculus]	0	6.616	5	1	6	1	282	32.6	11.27	132	6.64	1	1	Pf00076, Pf13893, Pf14259	101214	Tra2a	ENSMUSG00000029817.11	104545		136813	101003	73488.1		78315.6	101003	1
High	Master Protein	E9QPX1	Collagen alpha-1(XVIII) chain [OS=Mus musculus]	0	23.244	3	4	43	4	1774	182.2	5.71	695	42.22	4	3	Pf01391, Pf01392, Pf06121, Pf06482, Pf13385	12822	Col18a1	ENSMUSG00000001435.15	2.66746e+06	4.52053e+06	1.82118e+06	1.99355e+06	1.87505e+06	1.97368e+06	1.0425e+06	1.99355e+06	1	Oxidation [P886; P887; P889; P890; P892; P893; P895]
High	Master Protein	F6QHD1	protein LYRIC [OS=Mus musculus]	0.007	1.836	3	1	2	1	365	40.4	9.31	16	2.04	1	1				ENSMUSG00000022255.15	2.75018e+06	3.31645e+06	2.08337e+06	1.43307e+06	1.9332e+06	1.44797e+06	1.19258e+06	1.43307e+06	1
High	Master Protein	F6SVV1	40S ribosomal protein S7 [OS=Mus musculus]	0	9.721	13	3	35	3	192	21.9	10.02	173	21.34	3	3	Pf01251			ENSMUSG00000044424.3	1.50982e+06	2.99198e+06	1.74879e+06	2.30687e+06	1.06131e+06	1.30631e+06	1.00106e+06	2.30687e+06	1
High	Master Protein	F6TK14	fibroblast growth factor receptor [OS=Mus musculus]	0.002	2.665	1	1	6	1	801	87.7	6.32	46	5.48	1	1	Pf00047, Pf00069, Pf07679, Pf07714, Pf13895, Pf13927	14184	Fgfr3	ENSMUSG00000054252.17	476721	867472	584620	521543	335104	378741	334654	521543	1
High	Master Protein	F6V084	Thioredoxin-related transmembrane protein 1 [OS=Mus musculus]	0	8.269	10	1	16	1	124	14.4	5.06	294	18.01	1	1	Pf00085			ENSMUSG00000021072.12	305953	752846	302937	280403	215065	328695	173410	280403	1
High	Master Protein	F6VQ81	Tumor protein D54 [OS=Mus musculus]	0	6.465	17	2	13	2	161	17.7	8.19	48	3.88	2	2	Pf04201			ENSMUSG00000000827.18	303881	649388	544598	326332	213608	283525	311744	326332	1	Oxidation [P136]
High	Master Protein	F6VQH5	Heterogeneous nuclear ribonucleoprotein D-like [OS=Mus musculus]	0	9.718	8	2	17	1	323	35.6	7.8	185	10.12	2	2	Pf00076, Pf13893, Pf14259			ENSMUSG00000029328.15		141092	163928	84749.3		61601	93837.2	84749.3	1
Medium	Master Protein	F6WB49	Histone-lysine N-methyltransferase [OS=Mus musculus]	0.021	1.349	3	1	1	1	375	42.9	7.99	0		1		Pf00385, Pf00856, Pf05033			ENSMUSG00000026646.16	7.68189e+06	1.76891e+06	4.04585e+06	8.17989e+06	5.39986e+06	772310	2.31596e+06	8.17989e+06	1	Oxidation [K4]
High	Master Protein	F6WHQ7	Glutathione S-transferase Mu 1 [OS=Mus musculus]	0	10.178	11	2	14	2	194	22.6	9.07	142	8.28	2	2	Pf00043, Pf02798, Pf13410, Pf14497			ENSMUSG00000058135.12	1.47475e+06	1.78806e+06	627769	925299	1.03665e+06	780670	359353	925299	1
High	Master Protein	F6ZFU0	Elongation factor 1-delta [OS=Mus musculus]	0	40.945	17	7	64	1	552	61.4	7.39	876	70.34	7	7	Pf00736			ENSMUSG00000055762.15	5.05948e+06	9.05822e+06	4.26959e+06	4.49672e+06	3.55648e+06	3.95484e+06	2.44404e+06	4.49672e+06	1
Medium	Master Protein	F6ZKC7	cleavage stimulation factor subunit 2 [OS=Mus musculus]	0.012	1.638	8	1	1	1	259	26.6	8.32	0		1		Pf14327			ENSMUSG00000031256.11	648964	615640	510082	305228	456179	268790	291986	305228	1	Oxidation [P149; P152]
High	Master Protein	F7BJK1	Protocadherin 1 [OS=Mus musculus]	0.009	1.691	1	1	4	1	1077	116.4	5.08	0	0	1	1	Pf00028, Pf08374			ENSMUSG00000051375.15	116244	273509	93354.7	60540.5	81711.8	119415	53438.9	60540.5	1
High	Master Protein	F7BP55	Adenylate kinase 2, mitochondrial [OS=Mus musculus]	0.001	4.466	15	1	7	1	72	7.4	8.94	24	1.63	1	1	Pf00406, Pf13207			ENSMUSG00000028792.14	827917	673768	408843	618648	581971	294169	234033	618648	1
High	Master Protein	F7CHQ7	Nucleolar protein 56 [OS=Mus musculus]	0	7.274	12	2	10	2	222	24.4	9.44	153	10.65	2	2	Pf01798			ENSMUSG00000027405.16	191434	468593	248520	247576	134565	204589	142260	247576	1
High	Master Protein	F7CJS8	40S ribosomal protein S9 [OS=Mus musculus]	0	27.642	49	8	90	8	135	16.2	10.8	564	66.85	8	8	Pf00163, Pf01479			ENSMUSG00000006333.14	1.19889e+07	1.5389e+07	1.21639e+07	9.94725e+06	8.4274e+06	6.71889e+06	6.96299e+06	9.94725e+06	1
High	Master Protein	F8VPU2	FERM, RhoGEF and pleckstrin domain-containing protein 1 [OS=Mus musculus]	0	2.983	1	1	2	1	1048	118.8	7.88	0	0	1	1	Pf00169, Pf00373, Pf00621, Pf08736, Pf09379, Pf09380	223254	Farp1	ENSMUSG00000025555.14	227072	251371	143518	160261	159617	109749	82153.7	160261	1
High	Master Protein	F8VQJ3	Laminin subunit gamma-1 [OS=Mus musculus]	0	148.475	21	28	210	2	1607	177.1	5.19	2356	204.65	28	28	Pf00052, Pf00053, Pf00055, Pf00261, Pf01576, Pf04012, Pf05262, Pf05483, Pf05557, Pf05701, Pf06008, Pf06160, Pf08317, Pf10174, Pf12795, Pf13514, Pf13868, Pf13949	226519	Lamc1	ENSMUSG00000026478.14	6.98768e+06	1.9336e+07	7.08477e+06	7.63817e+06	4.91188e+06	8.44214e+06	4.05553e+06	7.63817e+06	1
High	Master Protein	F8WHM5	Golgi apparatus protein 1 [OS=Mus musculus]	0	16.4	5	6	16	6	1163	132.3	6.93	101	4.1	6	6	Pf00839			ENSMUSG00000003316.14	1.05564e+06	1.61091e+06	607734	1.12594e+06	742046	703327	347884	1.12594e+06	1
High	Master Protein	F8WHP8	ATP synthase subunit f, mitochondrial [OS=Mus musculus]	0.001	4.305	16	1	6	1	76	9	9.88	88	6.27	1	1	Pf10206			ENSMUSG00000038690.15	402650	1.05989e+06	585011	498121	283037	462752	334877	498121	1
Medium	Master Protein	F8WIV2	Serine (or cysteine) peptidase inhibitor, clade B, member 6a [OS=Mus musculus]	0.022	1.298	3	1	2	1	399	44.7	6.38	0	0	1	1	Pf00079	20719	Serpinb6a	ENSMUSG00000060147.15	189568	272910	69820.5	135750	133254	119153	39967.3	135750	1
High	Master Protein	F8WJ41	40S ribosomal protein S15a [OS=Mus musculus]	0	13.15	31	4	54	4	108	12.3	10.15	400	33.69	4	4	Pf00410			ENSMUSG00000008683.16	1.20962e+07	1.83415e+07	1.27362e+07	7.92458e+06	8.50286e+06	8.00796e+06	7.29056e+06	7.92458e+06	1	Oxidation [K43]
High	Master Protein	F8WJG3	transformer-2 protein homolog beta [OS=Mus musculus]	0	7.805	11	2	21	2	188	21.9	10.15	27	6.43	2	2	Pf00076, Pf08777, Pf13893, Pf14259	20462	Tra2b	ENSMUSG00000022858.15	605808	1.41137e+06	973071	506803	425843	616209	557014	506803	1
High	Master Protein	F8WJK8	Hsc70-interacting protein [OS=Mus musculus]	0	16.124	10	4	14	4	362	40.5	5.3	46	12.11	4	4	Pf00515, Pf13371, Pf13414, Pf13424, Pf13431, Pf13432			ENSMUSG00000022403.14	364354	1.0443e+06	93780.4	87262.3	256117	455943	53682.6	87262.3	1
Medium	Master Protein	G3UW94	MCG14259, isoform CRA_b [OS=Mus musculus]	0.022	1.311	3	1	4	1	239	27.8	8.68	16	1.68	1	1	Pf00076, Pf00642, Pf13893	108121	U2af1	ENSMUSG00000061613.12	391377	707744	366366	299444	275112	309003	209719	299444	1
High	Master Protein	G3UX26	Voltage-dependent anion-selective channel protein 2 [OS=Mus musculus]	0	51.696	30	6	62	6	283	30.4	7.58	1118	90.46	6	6	Pf01459			ENSMUSG00000021771.13	5.0488e+06	8.12216e+06	4.23449e+06	5.09673e+06	3.54898e+06	3.54616e+06	2.42394e+06	5.09673e+06	1
High	Master Protein	G3UXA6	polypyrimidine tract-binding protein 3 [OS=Mus musculus]	0.001	5.581	3	2	13	1	554	59.7	8.94	65	10.88	1	2	Pf00076, Pf13893, Pf14259	230257	Ptbp3; Rod1	ENSMUSG00000028382.15	117376	263441	173830	117666	82507.5	115019	99505.3	117666	1
High	Master Protein	G3UYP4	Potassium voltage-gated channel subfamily KQT member 5 [OS=Mus musculus]	0.005	2.386	1	1	437	1	823	90	9.42	720	295.44	1	1	Pf00520, Pf03520, Pf07885, Pf08016			ENSMUSG00000028033.16	1.22618e+09	9.41842e+08	4.32907e+08	7.49913e+08	8.61926e+08	4.11211e+08	2.47809e+08	7.49913e+08	1
High	Master Protein	G3UZI2	Heterogeneous nuclear ribonucleoprotein Q [OS=Mus musculus]	0	20.333	8	4	37	2	527	58.7	7.56	284	31.08	4	4	Pf00076, Pf13893, Pf14259			ENSMUSG00000032423.12	2.16588e+06	3.47651e+06	2.40518e+06	1.54664e+06	1.52247e+06	1.51785e+06	1.37679e+06	1.54664e+06	1
High	Master Protein	G3UZJ4	Peroxiredoxin-5, mitochondrial [OS=Mus musculus]	0	10.096	17	2	8	2	166	17.2	9.25	106	8.95	2	2	Pf00578, Pf05988, Pf08534			ENSMUSG00000024953.16	1.41934e+06	2.66583e+06	1.35975e+06	1.15929e+06	997706	1.16391e+06	778361	1.15929e+06	1
High	Master Protein	G3X9T7	Galectin [OS=Mus musculus]	0.001	3.932	4	1	2	1	353	40	9.31	30	1.86	1	1	Pf00337	16859	Lgals9	ENSMUSG00000001123.15	114248	268225		67963.2	80308.8	117108		67963.2	1
High	Master Protein	G3X9U9	mitochondrial fission 1 protein [OS=Mus musculus]	0.001	5.444	9	1	12	1	145	16.3	9.25	119	4.37	1	1	Pf14852, Pf14853	66437	Fis1	ENSMUSG00000019054.13	339982	640270	319192	262597	238985	279544	182715	262597	1
High	Master Protein	G5E866	splicing factor 3B subunit 1 [OS=Mus musculus]	0	15.989	4	4	19	4	1304	145.7	7.09	140	13.79	4	4	Pf02161, Pf08920, Pf12815, Pf13513	81898	Sf3b1	ENSMUSG00000025982.13	403691	1.05728e+06	453832	430287	283768	461610	259786	430287	1
High	Master Protein	G5E8F8	Integrin beta [OS=Mus musculus]	0.002	2.718	1	1	12	1	816	90	6.25	60	3.3	1	1	Pf00362, Pf07965, Pf08725, Pf10075	16419	Itgb5	ENSMUSG00000022817.14	162929	439469	145702	167680	114529	191873	83403.8	167680	1
High	Master Protein	G5E8R2	Tropomyosin 1, alpha, isoform CRA_k [OS=Mus musculus]	0	37.005	23	7	61	1	248	28.7	4.78	690	65.63	7	7	Pf00261, Pf12718	22003	Tpm1	ENSMUSG00000032366.15	700345	931455	430485	373599	492297	406676	246422	373599	1
High	Master Protein	G8JL54	COMM domain-containing protein 1 [OS=Mus musculus]	0.002	2.695	12	1	8	1	93	10.3	5.19	0	2.07	1	1				ENSMUSG00000051355.18	3.20443e+06	529001	5.76291e+06	2.82529e+06	2.2525e+06	230963	3.29886e+06	2.82529e+06	1
Medium	Master Protein	H3BKG0	Caveolin-1 [OS=Mus musculus]	0.019	1.403	11	1	4	1	93	10.4	6.05	24	0	1	1	Pf01146			ENSMUSG00000007655.16	222211	330120	199153	219451	156200	144131	114001	219451	1
High	Master Protein	H3BKM0	AP complex subunit beta [OS=Mus musculus]	0	11.317	5	4	12	4	913	101.3	5.29	79	8.02	4	4	Pf01602, Pf02883, Pf09066, Pf12717, Pf13646			ENSMUSG00000035152.14	150188	1.61335e+06	955240	570933	105572	704393	546807	570933	1
High	Master Protein	H3BKR2	Guanine nucleotide-binding protein G(I)/G(S)/G(T) subunit beta-1 [OS=Mus musculus]	0	18.498	12	3	36	1	273	30.2	6.21	539	39.54	3	3	Pf00400			ENSMUSG00000029064.15	4.23788e+06	5.92692e+06	2.46093e+06	3.76295e+06	2.97895e+06	2.58771e+06	1408705	3.76295e+06	1
High	Master Protein	H7BWX9	small ubiquitin-related modifier 2 [OS=Mus musculus]	0.001	5.338	23	1	8	1	53	6	8.91	106	8.26	1	1	Pf11976			ENSMUSG00000020738.16	973119	2.14824e+06	799643	722238	684039	937927	457739	722238	1
High	Master Protein	H7BX95	Serine/arginine-rich-splicing factor 1 [OS=Mus musculus]	0	28.309	23	6	78	6	253	28.3	10.08	946	78.96	6	6	Pf00076, Pf13893, Pf14259			ENSMUSG00000018379.17; ENSMUSG00000098301.6	1.35943e+07	1.9818e+07	8.21498e+06	8.70478e+06	9.55591e+06	8.65261e+06	4.70249e+06	8.70478e+06	1
High	Master Protein	J3QNY1	predicted pseudogene 9242 [OS=Mus musculus]	0	95.494	34	12	152	1	357	37.1	8.31	1887	161.6	10	12	Pf00076, Pf13893, Pf14259			ENSMUSG00000096156.1	2.74735e+06	6.0929e+06	3.01206e+06	1.72428e+06	1.93121e+06	2.66018e+06	1.72419e+06	1.72428e+06	1	Oxidation [P6]; Acetyl [N-Term]
High	Master Protein	K3W4Q8	Basigin [OS=Mus musculus]	0.001	3.693	5	1	6	1	218	24.1	5.36	50	3.46	1	1	Pf00047, Pf07679, Pf13927	12215	Bsg	ENSMUSG00000023175.15	348952	607532	424843	493309	245290	265250	243193	493309	1
High	Master Protein	O08547	Vesicle-trafficking protein SEC22b [OS=Mus musculus]	0	16.638	25	4	17	4	215	24.7	8.51	216	12.39	4	4	Pf00957, Pf13774	20333	Sec22b	ENSMUSG00000027879.9	2.1676e+06	2.40592e+06	695487	1.52069e+06	1.52368e+06	1.05043e+06	398117	1.52069e+06	1
High	Master Protein	O08553	Dihydropyrimidinase-related protein 2 [OS=Mus musculus]	0	24.233	10	4	48	4	572	62.2	6.38	468	45.66	4	4	Pf01979, Pf07969, Pf13147, Pf13594	12934	Dpysl2	ENSMUSG00000022048.8	2.41331e+06	3.7876e+08	2.00736e+08	2.19584e+06	1.6964e+06	1.65368e+08	1.14907e+08	2.19584e+06	1
High	Master Protein	O08677-1	kininogen-1 [OS=Mus musculus]	0	8.74	4	2	20	2	661	73.1	6.54	127	11.27	2	2	Pf00031	16644	Kng1		2.53522e+06	1.06569e+06	148134	353191	1.78209e+06	465283	84796.4	353191	1
High	Master Protein	O08795-1	Glucosidase 2 subunit beta [OS=Mus musculus]	0	13.779	7	3	20	3	521	58.8	4.46	236	11.61	3	3	Pf07915, Pf12999, Pf13015	19089	Prkcsh	ENSMUSG00000003402.14	334129	1.30531e+06	505219	334108	234871	569900	289202	334108	1
High	Master Protein	O09061	proteasome subunit beta type-1 [OS=Mus musculus]	0.001	4.373	6	1	2	1	240	26.4	7.81	38	2.39	1	1	Pf00227	19170	Psmb1	ENSMUSG00000014769.9	390461	302088	216356	388359	274468	131893	123848	388359	1
High	Master Protein	O35129	Prohibitin-2 [OS=Mus musculus]	0	18.346	18	5	25	5	299	33.3	9.83	261	17.46	5	5	Pf01145	12034	Phb2	ENSMUSG00000004264.17	3.34257e+06	4.54095e+06	2.55773e+06	2.40436e+06	2.34961e+06	1.98259e+06	1.46412e+06	2.40436e+06	1
High	Master Protein	O35295	Transcriptional activator protein Pur-beta [OS=Mus musculus]	0	12.043	12	2	24	2	324	33.9	5.43	328	10.78	2	2	Pf04845	19291	Purb	ENSMUSG00000094483.2	309474	689196	364469	277773	217540	300905	208633	277773	1
High	Master Protein	O35326	Serine/arginine-rich splicing factor 5 [OS=Mus musculus]	0	8.6	8	2	14	2	269	30.9	11.56	117	11.73	2	2	Pf00076, Pf13893, Pf14259	20384	Srsf5	ENSMUSG00000021134.17	695759	1.64436e+06	1.30854e+06	646029	489073	717933	749048	646029	1
High	Master Protein	O35385	Serine/threonine-protein phosphatase with EF-hands 2 [OS=Mus musculus]	0.007	2.106	1	1	2	1	757	86.6	7.03	27	1.71	1	1	Pf00036, Pf00149, Pf08321, Pf13202, Pf13405, Pf13499, Pf13833	19023	Ppef2	ENSMUSG00000029410.11	219732		61297.4	23755.8	154457		35088.4	23755.8	1
High	Master Protein	O35453	Serine protease hepsin [OS=Mus musculus]	0	3.628	2	1	8	1	436	46.8	7.43	51	9.43	1	1	Pf00089, Pf09272, Pf09342, Pf15494	15451	Hpn	ENSMUSG00000001249.14	640129	687879		436834	449969	300330		436834	1
High	Master Protein	O35658	Complement component 1 Q subcomponent-binding protein, mitochondrial [OS=Mus musculus]	0	10.336	10	2	6	2	278	31	4.92	109	7.03	2	2	Pf02330	12261	C1qbp			418012	287647	107020		182505	164658	107020	1
High	Master Protein	O35685	nuclear migration protein nudC [OS=Mus musculus]	0.001	5.542	3	1	14	1	332	38.3	5.26	149	8.99	1	1	Pf04969, Pf14050	18221	Nudc	ENSMUSG00000028851.6	358596	642492	357220	241662	252069	280514	204483	241662	1
High	Master Protein	O54724	caveolae-associated protein 1 [OS=Mus musculus]	0	7.482	9	3	12	3	392	43.9	5.52	46	3.79	3	3	Pf15237	19285	Ptrf; Cavin1	ENSMUSG00000004044.9	602712	905292	404673	581311	423667	395253	231647	581311	1
High	Master Protein	O54734	Dolichyl-diphosphooligosaccharide--protein glycosyltransferase 48 kDa subunit [OS=Mus musculus]	0.001	3.992	2	1	2	1	441	49	5.83	30	2.03	1	1	Pf03345	13200	Ddost	ENSMUSG00000028757.4	567462	901017	610345	435621	398889	393387	349379	435621	1
High	Master Protein	O55029	Coatomer subunit beta' [OS=Mus musculus]	0	11.176	4	3	12	3	905	102.4	5.3	66	9.88	3	3	Pf00400, Pf04053	50797	Copb2	ENSMUSG00000032458.6	826593	1.33436e+06	670742	663008	581041	582587	383952	663008	1
High	Master Protein	O55142	60S ribosomal protein L35a [OS=Mus musculus]	0	5.831	20	3	29	3	110	12.5	10.89	92	20.01	3	3	Pf01247	100043423; 57808; 100042363; 100302576; 100040169; 100046034; 100048620	Rpl35a-ps4; Rpl35a; Rpl35a-ps2; Gm10243; Rpl35a-ps5; LOC100862595; Gm14279; LOC100048620	ENSMUSG00000060636.13	4.87174e+06	7.4531e+06	4.48462e+06	4.78811e+06	3.42452e+06	3.25405e+06	2.56713e+06	4.78811e+06	1
High	Master Protein	O55143-1	Sarcoplasmic/endoplasmic reticulum calcium ATPase 2 [OS=Mus musculus]	0	10.51	3	2	16	2	1044	114.8	5.34	160	17.14	2	2	Pf00122, Pf00689, Pf00690, Pf00702, Pf08282, Pf12710, Pf13246	11938	Atp2a2	ENSMUSG00000029467.15	288124	390744	201533	263773	202533	170600	115363	263773	1
High	Master Protein	O55222	Integrin-linked protein kinase [OS=Mus musculus]	0	2.985	2	1	9	1	452	51.3	8.07	23	2.22	1	1	Pf00023, Pf00069, Pf07714, Pf12796, Pf13606, Pf13637, Pf13857	16202	Ilk	ENSMUSG00000030890.16	250107	559008	194151	238457	175809	244064	111138	238457	1
High	Master Protein	O55234	proteasome subunit beta type-5 [OS=Mus musculus]	0	21.467	17	4	30	4	264	28.5	7.02	385	44.9	4	4	Pf00227	19173	Psmb5	ENSMUSG00000022193.6	2.83785e+06	4.38015e+06	2.48196e+06	2.37807e+06	1.99482e+06	1.91239e+06	1.42075e+06	2.37807e+06	1
High	Master Protein	O70194	Eukaryotic translation initiation factor 3 subunit D [OS=Mus musculus]	0	11.098	6	3	6	3	548	63.9	6.05	71	2.56	3	3	Pf05091	55944	Eif3d	ENSMUSG00000016554.8	576674	1.18295e+06	1.51823e+06	431004	405364	516481	869077	431004	1
High	Master Protein	O70456	14-3-3 protein sigma [OS=Mus musculus]	0	60.306	33	11	87	7	248	27.7	4.78	651	82.23	10	11	Pf00244	55948	Sfn	ENSMUSG00000047281.3	1.92553e+07	435609	3.45745e+06	6.65204e+06	1.35352e+07	190188	1.97915e+06	6.65204e+06	1
High	Master Protein	O70475	UDP-glucose 6-dehydrogenase [OS=Mus musculus]	0	3.316	3	1	8	1	493	54.8	7.56	37	0	1	1	Pf00984, Pf03720, Pf03721	22235	Ugdh	ENSMUSG00000029201.14		246718	77219.1	87988.5		107718	44202.4	87988.5	1
High	Master Protein	O70562	small proline-rich protein 2K [OS=Mus musculus]	0.001	3.949	13	1	4	1	68	7.5	8.24	55	3.95	1	1		20765	Sprr2k		1.14083e+08	4.09948e+07	6.14021e+07	9.31678e+07	80192840	17898424	35148316	9.31678e+07	1
High	Master Protein	O70569	Ribosomal protein S14 [OS=Mus musculus]	0	30.956	31	4	38	4	151	16.3	10.13	427	48.9	4	4	Pf00411	20044	Rps14		4.92156e+07	2.14026e+07	4.13774e+07	4.05001e+07	3.45953e+07	9.34444e+06	2.36856e+07	4.05001e+07	1
High	Master Protein	O70591	Prefoldin subunit 2 [OS=Mus musculus]	0.002	2.721	8	1	6	1	154	16.5	6.58	0	0	1	1	Pf01920	18637	Pfdn2	ENSMUSG00000006412.10	364630	489792	523010		256311	213845	299386		1
Medium	Master Protein	O88207	Collagen alpha-1(V) chain [OS=Mus musculus]	0.019	1.387	0	1	2	1	1838	183.6	4.98	17	1.75	1	1	Pf01410, Pf02210, Pf13385	12831	Col5a1	ENSMUSG00000026837.15	166013	201199	95587.9	81401.7	116696	87843.9	54717.3	81401.7	1
High	Master Protein	O88456	Calpain small subunit 1 [OS=Mus musculus]	0.001	5.636	8	2	6	1	269	28.4	5.63	38	1.65	2	2	Pf13833	12336	Capns1		188443	467923		180679	132463	204296		180679	1
High	Master Protein	P00375	dihydrofolate reductase [OS=Mus musculus]	0	2.867	4	1	4	1	187	21.6	8.53	53	3.31	1	1	Pf00186, Pf13768	13361	Dhfr	ENSMUSG00000021707.4	292577	232842	101467	193899	205662	101659	58082.5	193899	1
High	Master Protein	P00920	Carbonic anhydrase 2 [OS=Mus musculus]	0	2.907	7	2	6	2	260	29	7.01	14	0	2	2	Pf00194	12349	Car2	ENSMUSG00000027562.12	815365	662806	289765	177616	573148	289383	165870	177616	1
High	Master Protein	P01027-1	Complement C3 [OS=Mus musculus]	0	10.273	3	4	9	4	1663	186.4	6.73	49	1.66	4	4	Pf00207, Pf01759, Pf01821, Pf01835, Pf07677, Pf07678, Pf07703, Pf10569, Pf11974	12266	C3	ENSMUSG00000024164.15	721346	1.38526e+06	176541	211429	507059	604809	101057	211429	1
High	Master Protein	P02104	Hemoglobin subunit epsilon-Y2 [OS=Mus musculus]	0	51.796	55	7	116	6	147	16.1	8.18	1579	145.28	7	6	Pf00042	15135	Hbb-y		3.13905e+06	6.33106e+06	4.23141e+06	5.57082e+06	2.20655e+06	2.76416e+06	2.42218e+06	5.57082e+06	1	Oxidation [P37]
High	Master Protein	P02463	Collagen alpha-1(IV) chain [OS=Mus musculus]	0	45.994	6	7	154	7	1669	160.6	8.24	1027	68.22	6	5	Pf01391, Pf01413	12826	Col4a1	ENSMUSG00000031502.11	4.03798e+06	1.14056e+07	3.54211e+06	3.55007e+06	2.83844e+06	4.97973e+06	2.02761e+06	3.55007e+06	1	Oxidation [P301; P304; P310; P313; P349; P352; P588; P594; P647; P648; P654; P657; P660]
High	Master Protein	P02468	Laminin subunit gamma-1 [OS=Mus musculus]	0	140.772	19	27	189	1	1607	177.2	5.21	1940	187.4	27	27	Pf00052, Pf00053, Pf00055, Pf01576, Pf05483, Pf05557, Pf06008, Pf06160, Pf08317, Pf13514	226519	Lamc1		280906	738002	210689	287704	197458	322214	120604	287704	1
High	Master Protein	P04104	Keratin, type II cytoskeletal 1 [OS=Mus musculus]	0	59.031	6	7	550	3	637	65.6	8.15	8060	700.42	7	7	Pf00038, Pf11853	16678	Krt1	ENSMUSG00000046834.6	6.98e+08	4.85501e+08	1.08846e+09	6.19052e+08	4.90648e+08	2.11971e+08	6.23069e+08	6.19052e+08	1	Oxidation [K296]
High	Master Protein	P04117	Fatty acid-binding protein, adipocyte [OS=Mus musculus]	0	56.511	52	8	88	8	132	14.6	8.4	1428	99.21	8	8	Pf00061	11770	Fabp4	ENSMUSG00000062515.3	7.393e+06	2.11627e+07	8.73857e+06	8.96948e+06	5.19679e+06	9.23971e+06	5.00221e+06	8.96948e+06	1
High	Master Protein	P04444	Hemoglobin subunit beta-H1 [OS=Mus musculus]	0.005	2.3	8	1	1	1	147	16.5	8.66	23		1		Pf00042	15132	Hbb-bh1	ENSMUSG00000052217.6	5.87705e+06	1.24855e+07	1.6508e+07	5.24702e+06	4.13118e+06	5451201	9449652	5.24702e+06	1
High	Master Protein	P05064	fructose-bisphosphate aldolase A [OS=Mus musculus]	0	79.791	47	15	111	14	364	39.3	8.09	1500	136.03	15	14	Pf00274	11674	Aldoa	ENSMUSG00000030695.14	3.6656e+07	3.46963e+07	1.76786e+07	2.08183e+07	2.57668e+07	1.51485e+07	1.01197e+07	2.08183e+07	1
High	Master Protein	P05202	Aspartate aminotransferase, mitochondrial [OS=Mus musculus]	0	50.639	28	11	87	11	430	47.4	9	923	94.98	11	11	Pf00155	14719	Got2	ENSMUSG00000031672.8	9.41089e+06	1.75894e+07	6.52814e+06	6.53884e+06	6.61524e+06	7.67957e+06	3.7369e+06	6.53884e+06	1
High	Master Protein	P05213	Tubulin alpha-1B chain [OS=Mus musculus]	0	110.43	41	13	196	1	451	50.1	5.06	3419	275.1	13	13	Pf00091, Pf03953	22143	Tuba1b	ENSMUSG00000023004.8	2.60293e+07	5.809e+07	3.01552e+07	2.94126e+07	1.82969e+07	2.53623e+07	1.72617e+07	2.94126e+07	1
High	Master Protein	P06467	Hemoglobin subunit zeta [OS=Mus musculus]	0	19.771	25	3	20	3	142	16.2	7.58	226	22.74	3	3	Pf00042	15126	Hba-x	ENSMUSG00000055609.8	345876	727547	464841	539620	243128	317649	266088	539620	1
High	Master Protein	P06745	glucose-6-phosphate isomerase [OS=Mus musculus]	0	17.752	9	4	34	4	558	62.7	8.13	165	18.83	4	4	Pf00342	14751	Gpi1	ENSMUSG00000036427.5	1.55892e+06	3.12087e+06	1.84988e+06	1.76677e+06	1.09582e+06	1.36258e+06	1.05892e+06	1.76677e+06	1
High	Master Protein	P07146	Anionic trypsin-2 [OS=Mus musculus]	0.001	5.654	8	1	76	1	246	26.2	4.63	221	6.38	1	1	Pf00089	22072	Prss2	ENSMUSG00000057163.3	4.27879e+06	2.30665e+06	3.24725e+06	2.34222e+06	3.00771e+06	1.00709e+06	1.85882e+06	2.34222e+06	1	Oxidation [P97]
High	Master Protein	P07724	Serum albumin [OS=Mus musculus]	0	160.76	45	24	369	24	608	68.6	6.07	5379	473.46	24	24	Pf00273	11657	Alb	ENSMUSG00000029368.10	3.62795e+07	5.7702e+07	4.01471e+07	2.32485e+07	2.55021e+07	2.51929e+07	2.29813e+07	2.32485e+07	1
High	Master Protein	P07744	Keratin, type II cytoskeletal 4 [OS=Mus musculus]	0	107.452	19	17	239	7	525	56.2	8.15	2591	271.62	17	17	Pf00038, Pf01576	16682	Krt4	ENSMUSG00000059668.5	1.22643e+06	8.92023e+06	884678	1.03762e+08	862103	3.8946e+06	506415	1.03762e+08	1
High	Master Protein	P07758	Alpha-1-antitrypsin 1-1 [OS=Mus musculus]	0	9.025	2	2	32	2	413	46	5.72	276	17.67	2	2	Pf00079	20700; 20703	Serpina1a; Serpina1d	ENSMUSG00000066366.14	1.36365e+06	3.4135e+06	1.04648e+06	1.02969e+06	958553	1.49034e+06	599034	1.02969e+06	1
High	Master Protein	P07901	Heat shock protein HSP 90-alpha [OS=Mus musculus]	0	105.156	24	18	185	10	733	84.7	5.01	2234	197.29	17	18	Pf00183, Pf02518, Pf13589	15519	Hsp90aa1	ENSMUSG00000021270.13	5.24253e+06	1.07784e+07	4.9156e+06	4.84625e+06	3.68516e+06	4.7059e+06	2.81383e+06	4.84625e+06	1
High	Master Protein	P08071	Lactotransferrin [OS=Mus musculus]	0.001	4.251	1	1	10	1	707	77.8	8.53	63	9.96	1	1	Pf00405, Pf12974	17002	Ltf	ENSMUSG00000032496.7	373757	164754	458794	471898	262727	71931.9	262627	471898	1
High	Master Protein	P08122	Collagen alpha-2(IV) chain [OS=Mus musculus]	0	35.952	5	6	73	6	1707	167.2	8.48	723	78.52	6	6	Pf01391, Pf01413	12827	Col4a2	ENSMUSG00000031503.13	5.84241e+06	1.68117e+07	6.72219e+06	4.27453e+06	4.10683e+06	7.34005e+06	3.84798e+06	4.27453e+06	1	Oxidation [P114; P120; P123; P128; P768; P776; P1497]
High	Master Protein	P08249	Malate dehydrogenase, mitochondrial [OS=Mus musculus]	0	25.865	17	5	43	5	338	35.6	8.68	512	35.95	5	5	Pf00056, Pf01073, Pf01118, Pf02866, Pf13460	17448	Mdh2	ENSMUSG00000019179.10	4.05887e+06	5.68523e+06	3.23206e+06	1.83269e+06	2.85312e+06	2.48219e+06	1.85012e+06	1.83269e+06	1
High	Master Protein	P08730-1	Keratin, type I cytoskeletal 13 [OS=Mus musculus]	0	95.856	28	16	381	6	437	47.7	4.86	4429	507.51	15	15	Pf00038, Pf13514	16663	Krt13	ENSMUSG00000044041.4	4.62956e+08	2.47012e+08	4.85732e+08	6.95125e+08	3.25428e+08	1.07846e+08	2.78047e+08	6.95125e+08	1	Oxidation [K214]
High	Master Protein	P08752	guanine nucleotide-binding protein G(i) subunit alpha-2 [OS=Mus musculus]	0	39.829	28	8	45	5	355	40.5	5.45	258	34.89	7	8	Pf00025, Pf00503	14678	Gnai2	ENSMUSG00000032562.13	3.93501e+06	7.72903e+06	2.93089e+06	3.86406e+06	2.76606e+06	3.37452e+06	1.67772e+06	3.86406e+06	1
High	Master Protein	P08884	granzyme E [OS=Mus musculus]	0	3.361	8	1	6	1	248	27.5	9.63	0	2.05	1	1	Pf00089	14942	Gzme	ENSMUSG00000022156.7	1.03792e+06	621626	321583		729592	271403	184084		1	Oxidation [P97; P99]
High	Master Protein	P09055	Integrin beta-1 [OS=Mus musculus]	0	64.015	17	12	145	12	798	88.2	5.94	1364	116.68	12	12	Pf00362, Pf07965, Pf08725	16412	Itgb1	ENSMUSG00000025809.15	7.24754e+06	1.70261e+07	5.36751e+06	5.65859e+06	5.09455e+06	7.43366e+06	3.07252e+06	5.65859e+06	1
High	Master Protein	P09103	Protein disulfide-isomerase [OS=Mus musculus]	0	83.136	33	15	171	15	509	57	4.88	1994	142.95	15	15	Pf00085, Pf01216, Pf13098, Pf13848, Pf13899, Pf13905	18453	P4hb	ENSMUSG00000025130.11	1.50476e+07	2.8017e+07	1.27935e+07	1.45917e+07	1.05774e+07	1.22323e+07	7.32338e+06	1.45917e+07	1
High	Master Protein	P09411	phosphoglycerate kinase 1 [OS=Mus musculus]	0	51.65	21	6	58	5	417	44.5	7.9	727	60.04	6	6	Pf00162	18655	Pgk1	ENSMUSG00000062070.12	3.09553e+06	2.801e+06	2.52557e+06	2.17194e+06	2.17595e+06	1.22292e+06	1.44571e+06	2.17194e+06	1
High	Master Protein	P09671	Superoxide dismutase [Mn], mitochondrial [OS=Mus musculus]	0.001	5.069	6	1	6	1	222	24.6	8.62	73	7.54	1	1	Pf00081, Pf02777	20656	Sod2	ENSMUSG00000006818.4	280661	502833	242481	227998	197286	219538	138803	227998	1
High	Master Protein	P10126	Elongation factor 1-alpha 1 [OS=Mus musculus]	0	129.057	34	16	384	16	462	50.1	9.01	4165	476.43	16	16	Pf00009, Pf03143, Pf03144	13627	Eef1a1; LOC101056619	ENSMUSG00000037742.14	1.28018e+08	2.04062e+08	1.29165e+08	1.17861e+08	8.99882e+07	8.90939e+07	7.39378e+07	1.17861e+08	1	Oxidation [K154; K273; P274; P409]
High	Master Protein	P10493	Nidogen-1 [OS=Mus musculus]	0	36.014	7	7	34	7	1245	136.5	5.44	440	35.88	7	7	Pf00008, Pf00058, Pf00086, Pf06119, Pf06247, Pf07474, Pf07645, Pf12662, Pf12947, Pf14670	18073	Nid1	ENSMUSG00000005397.7	2.0852e+06	6.23749e+06	1.83618e+06	2.24299e+06	1.46576e+06	2.72331e+06	1.05108e+06	2.24299e+06	1
High	Master Protein	P11031	Activated RNA polymerase II transcriptional coactivator p15 [OS=Mus musculus]	0	12.541	37	4	10	4	127	14.4	9.6	95	9.27	4	4	Pf02229	20024	Sub1	ENSMUSG00000022205.15	1.67516e+06	3.09088e+06	1.94334e+06	1.54818e+06	1.17753e+06	1.34949e+06	1.11242e+06	1.54818e+06	1	Oxidation [K97]
High	Master Protein	P11087-1	Collagen alpha-1(I) chain [OS=Mus musculus]	0	101.569	21	17	96	17	1453	137.9	5.85	443	54.77	17	14	Pf00093, Pf01391, Pf01410	12842	Col1a1	ENSMUSG00000001506.10	3.17735e+06	6.97598e+06	2.03989e+07	1.56443e+06	2.23347e+06	3.04573e+06	1.16769e+07	1.56443e+06	1	Oxidation [P392; P398; P401; P416; P470; P472; P473; P485; P503; K509; P512; P518; P524; P533; P536; P544; P545; P547; P554; P556; P559; P560; P572; P574; K575; P680; P761; P763; P767; P775; P859; P860; P866; P908; P913; P914; P916; P953; P985; P986; P988; P991; P998; P1034; P1037; P1040; K1051]
High	Master Protein	P11404	Fatty acid-binding protein, heart [OS=Mus musculus]	0	10.873	25	3	21	3	133	14.8	6.57	322	20.28	3	3	Pf00061, Pf14651	14077	Fabp3	ENSMUSG00000028773.8	5.15186e+06	7.77525e+06	3.77958e+06	2.22365e+06	3.62142e+06	3.3947e+06	2.16354e+06	2.22365e+06	1	Oxidation [K38]
High	Master Protein	P11499	Heat shock protein HSP 90-beta [OS=Mus musculus]	0	132.924	33	23	286	12	724	83.2	5.03	4089	367.22	21	23	Pf00183, Pf02518, Pf13589	15516	Hsp90ab1	ENSMUSG00000023944.14	6.10809e+07	9.17717e+07	7.16831e+07	5.06724e+07	4.29358e+07	4.00678e+07	4.10335e+07	5.06724e+07	1	Oxidation [K623]
High	Master Protein	P11983	T-complex protein 1 subunit alpha [OS=Mus musculus]	0	29.395	15	8	37	8	556	60.4	6.16	361	34.25	8	8	Pf00118	21454	Tcp1	ENSMUSG00000068039.12	2.52484e+06	5.77819e+06	2.11261e+06	3.24424e+06	1.77479e+06	2.52278e+06	1.20932e+06	3.24424e+06	1
High	Master Protein	P12970	60S ribosomal protein L7a [OS=Mus musculus]	0	59.584	36	12	130	12	266	30	10.56	1149	135.41	12	12	Pf01248	27176	Rpl7a	ENSMUSG00000062647.16	1.01171e+07	1.40666e+07	1.04083e+07	9.77089e+06	7.11164e+06	6.1415e+06	5.95801e+06	9.77089e+06	1
High	Master Protein	P13745	Glutathione S-transferase A1 [OS=Mus musculus]	0	15.834	17	4	29	4	223	25.6	8.98	204	19.87	4	4	Pf00043, Pf02798, Pf13336, Pf13409, Pf13417	14857	Gsta1	ENSMUSG00000074183.3	3.76529e+06	6.74162e+06	3.27886e+06	2.80724e+06	2.64675e+06	2.94341e+06	1.87692e+06	2.80724e+06	1
High	Master Protein	P14115	60S ribosomal protein L27a [OS=Mus musculus]	0	15.643	22	3	44	3	148	16.6	11.12	626	57.18	3	3	Pf00828	26451	Rpl27a	ENSMUSG00000046364.14	2.88699e+06	6.37504e+06	4.81193e+06	3.20282e+06	2.02937e+06	2.78336e+06	2.75449e+06	3.20282e+06	1
High	Master Protein	P14148	60S ribosomal protein L7 [OS=Mus musculus]	0	51.367	30	7	139	7	270	31.4	10.89	941	120.13	7	7	Pf00327, Pf08079	19989	Rpl7	ENSMUSG00000043716.13	1.31369e+07	1.67522e+07	1.14934e+07	8.9735e+06	9.23438e+06	7.31406e+06	6.57917e+06	8.9735e+06	1
High	Master Protein	P14152	Malate dehydrogenase, cytoplasmic [OS=Mus musculus]	0	56.543	30	9	112	9	334	36.5	6.58	2004	146.9	9	9	Pf00056, Pf02866	17449	Mdh1	ENSMUSG00000020321.15	1.99559e+07	4.74792e+07	1.96194e+07	1.85089e+07	1.40277e+07	2.07296e+07	1.12307e+07	1.85089e+07	1
High	Master Protein	P14206	40S ribosomal protein SA [OS=Mus musculus]	0	26.374	17	5	47	5	295	32.8	4.87	603	64.03	5	5	Pf00318	16785; 100045332; 102642689	Rpsa; LOC100045332; LOC100505031; LOC102642689	ENSMUSG00000032518.6	1.72e+07	2.6945e+07	1.76381e+07	1.26142e+07	1.20905e+07	1.17643e+07	1.00966e+07	1.26142e+07	1
High	Master Protein	P14602	Heat shock protein beta-1 [OS=Mus musculus]	0	6.598	9	2	8	1	209	23	6.55	91	10.09	2	2	Pf00011	15507	Hspb1	ENSMUSG00000004951.10	4.38466e+06	459638	602522	2.98679e+06	3.08213e+06	200679	344901	2.98679e+06	1
High	Master Protein	P14733	Lamin-B1 [OS=Mus musculus]	0	143.502	45	29	316	25	588	66.7	5.16	3519	333.14	28	29	Pf00038, Pf00932, Pf01576, Pf04111, Pf09726, Pf10186, Pf12128	16906	Lmnb1	ENSMUSG00000024590.8	2.32425e+07	4.28206e+07	2.14459e+07	2.15127e+07	1.6338e+07	1.86956e+07	1.22762e+07	2.15127e+07	1	Oxidation [P466]
High	Master Protein	P16125	L-lactate dehydrogenase B chain [OS=Mus musculus]	0	49.086	24	7	72	6	334	36.5	6.05	1015	85.34	7	7	Pf00056, Pf02866	16832	Ldhb	ENSMUSG00000030246.11	1.65715e+07	3.57012e+07	1.4489e+07	13543757	1.16487e+07	1.55872e+07	8.2939e+06	13543757	1
High	Master Protein	P16330	2',3'-cyclic-nucleotide 3'-phosphodiesterase [OS=Mus musculus]	0	13.128	6	2	4	2	420	47.1	8.97	25	4.47	2	2	Pf05881, Pf06414, Pf13207, Pf13238, Pf13401, Pf13671	12799	Cnp	ENSMUSG00000006782.16	281153	33279.4	411346	207258	197632	14529.9	235466	207258	1
High	Master Protein	P16406	Glutamyl aminopeptidase [OS=Mus musculus]	0	89.046	21	20	154	20	945	107.9	5.44	1431	129.78	20	20	Pf01433, Pf11838, Pf13485	13809	Enpep	ENSMUSG00000028024.14	1.34069e+07	2.51917e+07	8.95248e+06	1.30582e+07	9.42421e+06	1.09988e+07	5.12466e+06	1.30582e+07	1
High	Master Protein	P16460	Argininosuccinate synthase [OS=Mus musculus]	0	30.327	19	9	51	9	412	46.6	8.22	395	36.42	9	9	Pf00764, Pf03054, Pf06508	11898	Ass1	ENSMUSG00000076441.9	9.31726e+06	1.54624e+07	5.61107e+06	6.21623e+06	6.54942e+06	6.75094e+06	3.21194e+06	6.21623e+06	1
High	Master Protein	P16546	Spectrin alpha chain, non-erythrocytic 1 [OS=Mus musculus]	0	75.846	8	14	102	14	2472	284.4	5.33	795	66.95	14	14	Pf00018, Pf00036, Pf00435, Pf07653, Pf08239, Pf08726, Pf12128, Pf13405, Pf13499, Pf14604	20740	Spna2; Sptan1	ENSMUSG00000057738.13	1.14513e+07	1.85387e+07	9.47509e+06	8.81539e+06	8.0495e+06	8.09407e+06	5.42381e+06	8.81539e+06	1
High	Master Protein	P16858	glyceraldehyde-3-phosphate dehydrogenase [OS=Mus musculus]	0	114.4	53	15	315	15	333	35.8	8.25	4256	381.56	15	14	Pf00044, Pf02800	14433; 100042025; 100042746	Gapdh; Gm20899; LOC100042025; Gapdh-ps15; Gm12033	ENSMUSG00000057666.18	6.84487e+07	6.78351e+07	4.37847e+07	4.61887e+07	4.8115e+07	2.9617e+07	2.50636e+07	4.61887e+07	1	Oxidation [P127; K332]
High	Master Protein	P17182	alpha-enolase [OS=Mus musculus]	0	94.11	34	13	87	13	434	47.1	6.8	1177	122.93	12	13	Pf00113, Pf03952, Pf13378	13806; 433182	Eno1; Gm5506; Eno1b	ENSMUSG00000059040.4; ENSMUSG00000063524.13	2.2267e+07	7.83135e+06	2.11094e+07	1.00431e+07	1.56522e+07	3.41919e+06	1.20837e+07	1.00431e+07	1
High	Master Protein	P17751	Triosephosphate isomerase [OS=Mus musculus]	0	62.242	37	9	79	9	299	32.2	5.74	884	90.19	9	9	Pf00121	21991	Tpi1	ENSMUSG00000023456.14	1.07088e+07	3.50344e+06	4.83847e+06	4.20215e+06	7.52756e+06	1.52961e+06	2769681	4.20215e+06	1
High	Master Protein	P17897	Lysozyme c-1 [OS=Mus musculus]	0	12.853	14	2	38	2	148	16.8	9.41	582	57.43	2	2	Pf00062, Pf01464	17110	Lyz1	ENSMUSG00000069515.6	2.14568e+06	589169	464748	1.2455e+07	1.50828e+06	257233	266035	1.2455e+07	1
High	Master Protein	P17918	proliferating cell nuclear antigen [OS=Mus musculus]	0	28.385	23	4	39	4	261	28.8	4.77	532	39.02	4	4	Pf00705, Pf02747	18538	Pcna	ENSMUSG00000027342.14	979705	1.43877e+06	5.80698e+06	598105	688668	628172	3.32408e+06	598105	1	Oxidation [K77]
High	Master Protein	P18760	Cofilin-1 [OS=Mus musculus]	0	48.924	51	8	105	6	166	18.5	8.09	1340	125.11	8	8	Pf00241	12631	Cfl1	ENSMUSG00000056201.7	8.96484e+07	9.81105e+07	1.04008e+08	5.26516e+07	6.30169e+07	4.28353e+07	5.9537e+07	5.26516e+07	1
High	Master Protein	P19001	Keratin, type I cytoskeletal 19 [OS=Mus musculus]	0	50.587	14	8	262	1	403	44.5	5.39	2714	336.77	8	8	Pf00038	16669	Krt19	ENSMUSG00000020911.14	2.89411e+06	2.57354e+06	9.84469e+06	4.15627e+06	2.03437e+06	1.12362e+06	5.63539e+06	4.15627e+06	1
High	Master Protein	P19783	Cytochrome c oxidase subunit 4 isoform 1, mitochondrial [OS=Mus musculus]	0	16.064	18	3	42	3	169	19.5	9.23	265	36.74	3	3	Pf02936	12857	Cox4i1	ENSMUSG00000031818.12	1.67642e+06	3.14953e+06	1.54632e+06	1.71946e+06	1.17841e+06	1.37509e+06	885161	1.71946e+06	1
High	Master Protein	P21107-2	Isoform 2 of Tropomyosin alpha-3 chain [OS=Mus musculus]	0	76.632	35	13	102	8	248	29	4.78	1482	123.41	13	13	Pf00261, Pf12718	59069	Tpm3	ENSMUSG00000027940.18	1.07174e+07	1.33049e+07	9.87236e+06	8.8067e+06	7.53363e+06	5.80895e+06	5.65123e+06	8.8067e+06	1
Medium	Master Protein	P23116	Eukaryotic translation initiation factor 3 subunit A [OS=Mus musculus]	0.01	1.679	1	1	2	1	1344	161.8	6.77	17	0	1	1	Pf01399	13669	Eif3a	ENSMUSG00000024991.7	160545	303269	166931	138583	112853	132408	95556.4	138583	1
High	Master Protein	P24369	peptidyl-prolyl cis-trans isomerase B [OS=Mus musculus]	0	17.517	16	3	33	3	216	23.7	9.55	587	39.41	3	3	Pf00160	19035	Ppib	ENSMUSG00000032383.7	3.62302e+06	5.64384e+06	3.5909e+06	2.62182e+06	2.54675e+06	2.46412e+06	2.05553e+06	2.62182e+06	1
High	Master Protein	P24472	Glutathione S-transferase A4 [OS=Mus musculus]	0.001	5.445	5	1	8	1	222	25.5	7.39	77	6.47	1	1	Pf00043, Pf02798, Pf14497	14860	Gsta4	ENSMUSG00000032348.6	281008	551852	432928	289433	197531	240940	247821	289433	1
Medium	Master Protein	P24527	leukotriene A-4 hydrolase [OS=Mus musculus]	0.022	1.325	2	1	2	1	611	69	6.42	0	0	1	1	Pf01433, Pf09127, Pf13485	16993	Lta4h	ENSMUSG00000015889.8	693127	1.26099e+06	868440	424285	487223	550551	497120	424285	1
High	Master Protein	P26041	Moesin [OS=Mus musculus]	0	57.592	24	15	135	9	577	67.7	6.6	837	82.9	15	15	Pf00373, Pf00769, Pf09379, Pf09380	17698	Msn	ENSMUSG00000031207.16	3.12394e+07	1.9662e+07	9.96285e+06	2.0151e+07	2.19592e+07	8.58448e+06	5.70303e+06	2.0151e+07	1
High	Master Protein	P26043	radixin [OS=Mus musculus]	0	36.58	15	9	78	3	583	68.5	6.2	648	63.21	9	9	Pf00373, Pf00769, Pf09379, Pf09380	19684	Rdx	ENSMUSG00000032050.17	643823	1.2075e+06	531863	532888	452565	527197	304454	532888	1
High	Master Protein	P26369	Splicing factor U2AF 65 kDa subunit [OS=Mus musculus]	0.002	2.603	2	1	8	1	475	53.5	9.09	52	3.62	1	1	Pf00076, Pf13893, Pf14259	22185	U2af2	ENSMUSG00000030435.16	208536	381387	350305	236065	146587	166515	200525	236065	1
High	Master Protein	P26443	Glutamate dehydrogenase 1, mitochondrial [OS=Mus musculus]	0	33.6	16	7	54	7	558	61.3	8	592	57.23	7	7	Pf00208, Pf02812	14661	Glud1	ENSMUSG00000021794.15	3.67546e+06	4.28562e+06	2.44888e+06	2.61282e+06	2.58361e+06	1.87112e+06	1.40181e+06	2.61282e+06	1
High	Master Protein	P27773	Protein disulfide-isomerase A3 [OS=Mus musculus]	0	109.97	36	17	252	17	505	56.6	6.21	3213	269.81	16	17	Pf00085, Pf13098, Pf13848, Pf13899, Pf13905	14827	Pdia3	ENSMUSG00000027248.13	1.67619e+07	4.12994e+07	1.52646e+07	1.5913e+07	1.17825e+07	1.80314e+07	8.73789e+06	1.5913e+07	1
High	Master Protein	P28843	Dipeptidyl peptidase 4 [OS=Mus musculus]	0	53.615	15	11	84	11	760	87.4	6.42	1269	105.41	11	11	Pf00326, Pf00930, Pf01738, Pf12695, Pf12697	13482	Dpp4	ENSMUSG00000035000.8	8.3644e+06	1.57473e+07	8.02675e+06	6.65445e+06	5.87963e+06	6875308	4.59475e+06	6.65445e+06	1
High	Master Protein	P29341	Polyadenylate-binding protein 1 [OS=Mus musculus]	0	23.049	10	6	30	6	636	70.6	9.5	287	20.96	6	6	Pf00076, Pf00658, Pf13893, Pf14259	18458	Pabpc1	ENSMUSG00000022283.14	1.41524e+06	3.01421e+06	1.99699e+06	1.29544e+06	994820	1.31601e+06	1.14314e+06	1.29544e+06	1
High	Master Protein	P30416	Peptidyl-prolyl cis-trans isomerase FKBP4 [OS=Mus musculus]	0	7.494	5	2	10	2	458	51.5	5.72	74	7.52	2	2	Pf00254, Pf00515, Pf07719, Pf13414, Pf13424, Pf13432, Pf14559	14228	Fkbp4	ENSMUSG00000030357.10	935516	781353	1.09743e+06	649340	657606	341141	628199	649340	1
High	Master Protein	P31786	acyl-CoA-binding protein [OS=Mus musculus]	0.001	4.41	11	1	10	1	87	10	8.82	109	7.92	1	1	Pf00887	13167	Dbi	ENSMUSG00000026385.16	320448	517935	708831	208617	225254	226132	405755	208617	1
High	Master Protein	P32020	Non-specific lipid-transfer protein [OS=Mus musculus]	0	15.342	6	3	28	3	547	59.1	7.44	270	26.46	3	3	Pf00108, Pf00109, Pf02036, Pf02801, Pf02803, Pf08545, Pf14864	20280	Scp2	ENSMUSG00000028603.15	778623	1.35993e+06	548889	544365	547321	593751	314200	544365	1
High	Master Protein	P32067	Lupus La protein homolog [OS=Mus musculus]	0	9.593	4	2	4	2	415	47.7	9.77	78	4.4	2	2	Pf00076, Pf05383, Pf08777, Pf14259	20823	Ssb	ENSMUSG00000068882.13	1.09746e+06	1.86289e+06	1.14455e+06	723057	771440	813342	655172	723057	1
High	Master Protein	P32233	developmentally-regulated GTP-binding protein 1 [OS=Mus musculus]	0.008	1.786	3	1	2	1	367	40.5	8.9	0	0	1	1	Pf00009, Pf01926, Pf02421, Pf02824	13494	Drg1	ENSMUSG00000020457.13	95580.6	162856	80396.2	117876	67186.9	71103.2	46021.1	117876	1
High	Master Protein	P35278	Ras-related protein Rab-5C [OS=Mus musculus]	0	23.408	17	3	34	2	216	23.4	8.41	625	43.07	3	3	Pf00009, Pf00025, Pf00071, Pf04670, Pf08477	19345	Rab5c	ENSMUSG00000019173.11	3.49237e+06	5.14906e+06	3.10597e+06	2.59394e+06	2.4549e+06	2.2481e+06	1.77795e+06	2.59394e+06	1	Oxidation [K135]
High	Master Protein	P35700	peroxiredoxin-1 [OS=Mus musculus]	0	27.552	29	7	107	5	199	22.2	8.12	1056	103.29	7	7	Pf00578, Pf08534, Pf10417	18477	Prdx1	ENSMUSG00000028691.12	1.70091e+07	2.38637e+07	1.92445e+07	1.69466e+07	1.19563e+07	1.0419e+07	1.10161e+07	1.69466e+07	1
High	Master Protein	P37804	transgelin [OS=Mus musculus]	0.001	3.939	4	1	4	1	201	22.6	8.81	64	1.62	1	1	Pf00307, Pf00402	21345	Tagln	ENSMUSG00000032085.5	153533	264463	92692.2	95833	107924	115465	53059.7	95833	1
High	Master Protein	P38647	Stress-70 protein, mitochondrial [OS=Mus musculus]	0	62.102	20	10	88	10	679	73.4	6.07	1459	93.38	10	10	Pf00012, Pf06723	15526	Hspa9	ENSMUSG00000024359.8	3.26765e+06	4.09534e+06	2.55343e+06	2.55322e+06	2.29695e+06	1.78804e+06	1.46166e+06	2.55322e+06	1
High	Master Protein	P39447	Tight junction protein ZO-1 [OS=Mus musculus]	0	55.377	8	12	68	12	1745	194.6	6.64	577	54.25	12	12	Pf00018, Pf00595, Pf00625, Pf00791, Pf07653, Pf13180	21872	Tjp1	ENSMUSG00000030516.14	2.57951e+06	6.35297e+06	9.97421e+06	2.13595e+06	1.81323e+06	2.77372e+06	5.70953e+06	2.13595e+06	1	Oxidation [K348]
High	Master Protein	P40124	adenylyl cyclase-associated protein 1 [OS=Mus musculus]	0	26.503	13	6	53	6	474	51.5	7.52	516	40.1	6	6	Pf01213, Pf07986, Pf08603	12331	Cap1	ENSMUSG00000028656.14	1.79485e+07	8.28771e+06	9.11569e+06	1.60205e+07	12616650	3.61844e+06	5.21809e+06	1.60205e+07	1
High	Master Protein	P40142	Transketolase [OS=Mus musculus]	0	51.389	21	10	93	10	623	67.6	7.5	1153	108.86	10	10	Pf00456, Pf00676, Pf02779, Pf02780	21881	Tkt	ENSMUSG00000021957.6	8.60241e+06	1.31921e+07	5.74282e+06	5.43201e+06	6.04693e+06	5.7597e+06	3.28735e+06	5.43201e+06	1
High	Master Protein	P42208	septin-2 [OS=Mus musculus]	0	33.874	23	5	44	5	361	41.5	6.55	574	54.79	5	5	Pf00071, Pf00735, Pf01926	18000	Sept2	ENSMUSG00000026276.18; ENSMUSG00000112508.1	1.64603e+06	3.43418e+06	1.91026e+06	1.78777e+06	1.15705e+06	1.49937e+06	1.09349e+06	1.78777e+06	1
Medium	Master Protein	P42669	Transcriptional activator protein Pur-alpha [OS=Mus musculus]	0.019	1.395	3	1	2	1	321	34.9	6.44	0	0	1	1	Pf04845	19290	Pura	ENSMUSG00000043991.4		925329	784929	517599		404001	449316	517599	1
High	Master Protein	P43275	Histone H1.1 [OS=Mus musculus]	0	14.514	10	3	32	1	213	21.8	10.93	399	33.15	3	3	Pf00538	80838	Hist1h1a	ENSMUSG00000049539.2	789039	1.84732e+06	968068	411330	554642	806546	554150	411330	1
High	Master Protein	P45591	Cofilin-2 [OS=Mus musculus]	0	10.563	16	3	29	1	166	18.7	7.88	300	29.95	3	3	Pf00241	12632	Cfl2	ENSMUSG00000062929.7	419882	292574	196062	341458	295150	127738	112232	341458	1
High	Master Protein	P45952	medium-chain specific acyl-CoA dehydrogenase, mitochondrial [OS=Mus musculus]	0	18.397	11	4	26	4	421	46.5	8.37	164	15.05	4	4	Pf00441, Pf02770, Pf02771, Pf08028	11364	Acadm	ENSMUSG00000062908.12	1.58358e+06	3.15188e+06	775316	1.09659e+06	1.11315e+06	1.37612e+06	443813	1.09659e+06	1
High	Master Protein	P46460	Vesicle-fusing ATPase [OS=Mus musculus]	0.005	2.357	1	1	8	1	744	82.6	6.95	28	0	1	1	Pf00004, Pf00910, Pf01078, Pf02359, Pf02933, Pf05272, Pf05496, Pf06068, Pf07724, Pf07728, Pf13173, Pf13191, Pf13207, Pf13401	18195	Nsf	ENSMUSG00000034187.18	386982	560207	259673	328732	272023	244588	148645	328732	1
High	Master Protein	P46638	Ras-related protein Rab-11B [OS=Mus musculus]	0	24.328	27	6	50	6	218	24.5	5.94	324	51.4	6	6	Pf00025, Pf00071, Pf01926, Pf08477, Pf13401	19326	Rab11b	ENSMUSG00000077450.12	4.53253e+06	6.60229e+06	3.97175e+06	3.68923e+06	3.18608e+06	2.88258e+06	2.27354e+06	3.68923e+06	1
High	Master Protein	P46735-1	Unconventional myosin-Ib [OS=Mus musculus]	0.001	4.539	1	1	10	1	1107	128.5	9.26	57	3.93	1	1	Pf00063, Pf06017	17912	Myo1b	ENSMUSG00000018417.14	339251	767980	981248	271846	238471	335302	561695	271846	1
High	Master Protein	P46935	E3 ubiquitin-protein ligase NEDD4 [OS=Mus musculus]	0.004	2.46	1	1	2	1	887	102.6	5.26	17	0	1	1	Pf00168, Pf00397, Pf00632	17999	Nedd4	ENSMUSG00000032216.14	132899	199614		120676	93419.4	87152.2		120676	1
High	Master Protein	P47738	Aldehyde dehydrogenase, mitochondrial [OS=Mus musculus]	0	29.57	11	5	32	5	519	56.5	7.62	402	28.7	5	5	Pf00171	11669	Aldh2	ENSMUSG00000029455.14	814488	2.62603e+06	1.21565e+06	1.32815e+06	572532	1.14653e+06	695875	1.32815e+06	1
High	Master Protein	P47962	60S ribosomal protein L5 [OS=Mus musculus]	0	47.17	34	8	106	8	297	34.4	9.77	818	83.68	8	8	Pf00861, Pf14204	100503670	Rpl5	ENSMUSG00000058558.12	6.23696e+06	1.16249e+07	7.34866e+06	4.92382e+06	4.38417e+06	5.07547e+06	4.20658e+06	4.92382e+06	1
High	Master Protein	P47963	60S ribosomal protein L13 [OS=Mus musculus]	0	25.032	24	5	80	5	211	24.3	11.55	802	73.81	5	5	Pf01294	270106	Rpl13	ENSMUSG00000000740.12	6.29652e+06	9.41534e+06	5.94126e+06	2.84054e+06	4.42604e+06	4.11076e+06	3.40095e+06	2.84054e+06	1	Oxidation [P153]
High	Master Protein	P48036	annexin A5 [OS=Mus musculus]	0	39.583	21	7	78	7	319	35.7	4.96	837	84.83	7	7	Pf00191	11747	Anxa5	ENSMUSG00000027712.13	1.13413e+07	1.522e+07	9.89628e+06	6.15479e+06	7.97221e+06	6.64509e+06	5.66492e+06	6.15479e+06	1	Oxidation [K84]
High	Master Protein	P48678-1	Prelamin-A/C [OS=Mus musculus]	0	153.558	33	24	287	22	665	74.2	6.98	3417	278.51	24	23	Pf00038, Pf00932, Pf12128	16905	Lmna	ENSMUSG00000028063.15	3.86522e+07	2.55568e+07	1.52107e+07	1.68111e+07	2.717e+07	1.11582e+07	8.70706e+06	1.68111e+07	1
High	Master Protein	P48758	Carbonyl reductase [NADPH] 1 [OS=Mus musculus]	0	10.848	12	4	33	4	277	30.6	8.31	150	19.89	4	4	Pf00106, Pf01370, Pf08659, Pf13561	12408	Cbr1	ENSMUSG00000051483.8	2.30009e+06	1.35744e+06	2.94178e+06	1.94466e+06	1.61681e+06	592664	1.68396e+06	1.94466e+06	1
Medium	Master Protein	P48771	Cytochrome c oxidase subunit 7A2, mitochondrial [OS=Mus musculus]	0.016	1.546	12	1	2	1	83	9.3	10.27	17	0	1	1	Pf02238	12866	Cox7a2	ENSMUSG00000032330.7	785298	653817	1.17019e+06	534952	552013	285458	669851	534952	1
High	Master Protein	P49722	Proteasome subunit alpha type-2 [OS=Mus musculus]	0	9.353	17	3	26	3	234	25.9	7.43	116	4.01	3	3	Pf00227, Pf10584	19166	Psma2	ENSMUSG00000015671.10	1.76519e+06	1.51633e+06	899618	1.43445e+06	1.24082e+06	662035	514968	1.43445e+06	1
High	Master Protein	P50446	Keratin, type II cytoskeletal 6A [OS=Mus musculus]	0	281.356	38	31	764	4	553	59.3	7.94	9427	1014	31	31	Pf00038, Pf01576, Pf04111, Pf05957, Pf12128, Pf13166	16687	Krt6a	ENSMUSG00000058354.6	3.10873e+08	2.01548e+08	6.17938e+08	1.04048e+09	2.18524e+08	8.79965e+07	3.53726e+08	1.04048e+09	1	Oxidation [K270; K348]
High	Master Protein	P50516-1	V-type proton ATPase catalytic subunit A [OS=Mus musculus]	0	10.413	2	1	14	1	617	68.3	5.58	158	7.8	1	1	Pf00006, Pf00306, Pf02874	11964	Atp6v1a	ENSMUSG00000052459.13	387848	450602	244582	272240	272631	196734	140006	272240	1
High	Master Protein	P50543	protein S100-A11 [OS=Mus musculus]	0.001	5.433	10	1	2	1	98	11.1	5.45	53	3.68	1	1	Pf00036, Pf01023, Pf13499, Pf13833	20195	S100a11	ENSMUSG00000027907.4	2.38681e+06	317123	479447		1677768	138457	274449		1
High	Master Protein	P50580	proliferation-associated protein 2G4 [OS=Mus musculus]	0	8.66	10	3	18	3	394	43.7	6.86	67	4.47	3	3	Pf00557	18813	Pa2g4	ENSMUSG00000025364.13	1.12606e+06	1.89724e+06	1.12562e+06	969583	791549	828341	644336	969583	1
High	Master Protein	P51660	peroxisomal multifunctional enzyme type 2 [OS=Mus musculus]	0	6.452	2	1	16	1	735	79.4	8.57	160	8.3	1	1	Pf00106, Pf01575, Pf02036, Pf08659, Pf13452, Pf13561, Pf14864	15488	Hsd17b4	ENSMUSG00000024507.6	182824	348496	172162	154177	128513	152154	98550.7	154177	1
High	Master Protein	P51881	ADP/ATP translocase 2 [OS=Mus musculus]	0	50.227	31	11	187	6	298	32.9	9.73	1654	179.97	11	11	Pf00153	11740	Slc25a5	ENSMUSG00000016319.3	3.72755e+07	5.84257e+07	2.91563e+07	3.11246e+07	2.62022e+07	2.55088e+07	1.66899e+07	3.11246e+07	1
High	Master Protein	P52196	thiosulfate sulfurtransferase [OS=Mus musculus]	0.002	2.735	6	1	8	1	297	33.4	7.85	0	0	1	1	Pf00581	22117	Tst	ENSMUSG00000044986.8	101727	147692	77694.1	95797.7	71507.2	64482.7	44474.4	95797.7	1
High	Master Protein	P52480	Pyruvate kinase PKM [OS=Mus musculus]	0	68.547	26	10	104	10	531	57.8	7.47	1284	135.83	10	10	Pf00224, Pf02887	18746	Pkm	ENSMUSG00000032294.17	1.17762e+07	1.49411e+07	1.14167e+07	1.17e+07	8.27789e+06	6.52331e+06	6.53527e+06	1.17e+07	1
High	Master Protein	P52795	ephrin-B1 [OS=Mus musculus]	0	3.409	9	2	6	2	345	37.8	9.03	0	0	1	2	Pf00812	13641	Efnb1	ENSMUSG00000031217.8	436569	811875	349966	306683	306879	354467	200331	306683	1
High	Master Protein	P53994	Ras-related protein Rab-2A [OS=Mus musculus]	0	11.434	14	2	8	2	212	23.5	6.54	148	10.93	2	2	Pf00009, Pf00025, Pf00071, Pf01926, Pf04670, Pf08477	59021	Rab2a	ENSMUSG00000047187.9	528267	827901	594091	589595	371337	361464	340075	589595	1
High	Master Protein	P54071	Isocitrate dehydrogenase [NADP], mitochondrial [OS=Mus musculus]	0	37.427	19	8	57	7	452	50.9	8.69	546	52.42	8	8	Pf00180	269951	Idh2	ENSMUSG00000030541.16	5.46445e+06	1.00333e+07	3.35448e+06	3.13788e+06	3.84115e+06	4.38056e+06	1.9202e+06	3.13788e+06	1
High	Master Protein	P56382	ATP synthase subunit epsilon, mitochondrial [OS=Mus musculus]	0.001	5.253	31	2	21	2	52	5.8	10.01	90	18.88	2	2	Pf04627	67126	Atp5e	ENSMUSG00000016252.7	1.60413e+06	2.39483e+06	1.16099e+06	1.09224e+06	1.1276e+06	1.04559e+06	664584	1.09224e+06	1
High	Master Protein	P56399	Ubiquitin carboxyl-terminal hydrolase 5 [OS=Mus musculus]	0	7.085	4	3	12	3	858	95.8	5.01	40	1.67	3	3	Pf00443, Pf00627, Pf02148, Pf13423	22225	Usp5	ENSMUSG00000038429.10	520739	1.11451e+06	599894	415693	366046	486598	343397	415693	1
High	Master Protein	P56480	ATP synthase subunit beta, mitochondrial [OS=Mus musculus]	0	103.514	33	13	236	13	529	56.3	5.34	2634	277.04	13	13	Pf00006, Pf00306, Pf02874	11947	Atp5b	ENSMUSG00000025393.12	3.02604e+07	4.6165e+07	2.84582e+07	2.72554e+07	2.12711e+07	2.01558e+07	1.62903e+07	2.72554e+07	1
High	Master Protein	P59999	Actin-related protein 2/3 complex subunit 4 [OS=Mus musculus]	0	9.211	11	2	20	2	168	19.7	8.43	237	14.68	2	2	Pf05856	68089	Arpc4	ENSMUSG00000079426.13	3.34546e+06	4.39347e+06	2.36515e+06	2.19215e+06	2.35164e+06	1.9182e+06	1353880	2.19215e+06	1
High	Master Protein	P60122	RuvB-like 1 [OS=Mus musculus]	0	11.585	8	3	20	3	456	50.2	6.42	169	12.07	3	3	Pf00004, Pf01078, Pf01695, Pf05496, Pf06068, Pf06414, Pf07726, Pf13191, Pf13238, Pf13245, Pf13481	56505	Ruvbl1	ENSMUSG00000030079.15	859543	2.29984e+06	782098	951361	604202	1.00412e+06	447696	951361	1
High	Master Protein	P60335	Poly(RC)-binding protein 1 [OS=Mus musculus]	0	39.524	26	7	82	5	356	37.5	7.09	949	71.91	7	7	Pf00013, Pf13014	23983	Pcbp1	ENSMUSG00000051695.6	4.90188e+06	7.93239e+06	3.82106e+06	6.36065e+06	3.4457e+06	3.46331e+06	2.18728e+06	6.36065e+06	1
High	Master Protein	P60766-2	Cell division control protein 42 homolog [OS=Mus musculus]	0	8.953	11	2	29	1	191	21.2	6.55	247	22.09	2	2	Pf00025, Pf00071, Pf08477	12540	Cdc42	ENSMUSG00000006699.17	825072	1.108e+06	561246	733832	579972	483754	321273	733832	1
High	Master Protein	P60867	40S ribosomal protein S20 [OS=Mus musculus]	0	13.19	18	3	24	3	119	13.4	9.94	229	21.25	3	3	Pf00338	67427	Rps20	ENSMUSG00000028234.6	1.16899e+06	1.23952e+06	1.17621e+06	1.43294e+06	821722	541180	673296	1.43294e+06	1
High	Master Protein	P61027	ras-related protein rab-10 [OS=Mus musculus]	0	11.119	15	3	10	1	200	22.5	8.38	0	19.89	1	3	Pf00025, Pf00071, Pf04670, Pf08477	19325	Rab10	ENSMUSG00000020671.9	242873	170571		249078	170724	74472		249078	1
High	Master Protein	P61089	ubiquitin-conjugating enzyme E2 N [OS=Mus musculus]	0	6.79	7	1	18	1	152	17.1	6.57	275	20.83	1	1	Pf00179, Pf05743, Pf05773	93765	Ube2n	ENSMUSG00000074781.5	1.42967e+06	1.80681e+06	825267	919813	1.00497e+06	788858	472407	919813	1
High	Master Protein	P61161	Actin-related protein 2 [OS=Mus musculus]	0	15.849	20	6	24	6	394	44.7	6.74	110	9.16	6	6	Pf00022	66713	Actr2	ENSMUSG00000020152.7	1.47557e+06	1.9689e+06	992130	1.29468e+06	1.03723e+06	859627	567924	1.29468e+06	1	Oxidation [P113; P116; K118]
High	Master Protein	P61164	Alpha-centractin [OS=Mus musculus]	0	2.988	3	1	2	1	376	42.6	6.64	26	1.79	1	1	Pf00022	54130	Actr1a	ENSMUSG00000025228.4	877119	1.26709e+06	655717	510564	616557	553214	375352	510564	1
High	Master Protein	P61205	ADP-ribosylation factor 3 [OS=Mus musculus]	0	15.421	16	3	36	2	181	20.6	7.43	449	38.78	3	3	Pf00025, Pf00071, Pf00503, Pf01926, Pf04670, Pf08477, Pf09439	11842	Arf3	ENSMUSG00000051853.9	3.29402e+06	3.92483e+06	2.78174e+06	2.38714e+06	2.31548e+06	1.71359e+06	1.59235e+06	2.38714e+06	1
High	Master Protein	P61358	60S ribosomal protein L27 [OS=Mus musculus]	0	23.014	36	4	68	4	136	15.8	10.56	537	49.24	4	4	Pf00467, Pf01777	19942; 108167922	Rpl27; LOC108167922	ENSMUSG00000063316.13; ENSMUSG00000073640.2	7.74894e+07	1.18722e+08	7.30354e+07	4.28135e+07	5.44699e+07	5.18345e+07	4.18076e+07	4.28135e+07	1
High	Master Protein	P61620	Protein transport protein Sec61 subunit alpha isoform 1 [OS=Mus musculus]	0	9.151	4	2	20	2	476	52.2	8.06	259	20.97	2	2	Pf00344, Pf10559	53421	Sec61a1	ENSMUSG00000030082.14	1.39223e+06	1.96939e+06	910076	1.01714e+06	978644	859839	520954	1.01714e+06	1
High	Master Protein	P61750	ADP-ribosylation factor 4 [OS=Mus musculus]	0	10.112	12	2	22	1	180	20.4	7.14	157	19.59	2	2	Pf00025, Pf00071, Pf00503, Pf04670, Pf08477, Pf09439	11843	Arf4	ENSMUSG00000021877.11	514607	663281	378290	315676	361735	289590	216544	315676	1
High	Master Protein	P61982	14-3-3 protein gamma [OS=Mus musculus]	0	44.019	30	9	113	3	247	28.3	4.89	1154	108.72	9	9	Pf00244	22628	Ywhag	ENSMUSG00000051391.9	3.93062e+06	5.93762e+06	2.50012e+06	2.62734e+06	2.76297e+06	2.59238e+06	1.43114e+06	2.62734e+06	1	Oxidation [K28]
High	Master Protein	P62071	Ras-related protein R-Ras2 [OS=Mus musculus]	0	9.692	11	2	16	2	204	23.4	6.01	78	6.83	2	2	Pf00071, Pf08477	66922	Rras2	ENSMUSG00000055723.6	906610	2.03767e+06	518727	666896	637288	889652	296934	666896	1
High	Master Protein	P62141	Serine/threonine-protein phosphatase PP1-beta catalytic subunit [OS=Mus musculus]	0.001	4.641	3	1	12	1	327	37.2	6.19	117	11.62	1	1	Pf00149	19046	Ppp1cb	ENSMUSG00000014956.15	165891	391624	213744	139574	116610	170984	122354	139574	1
High	Master Protein	P62192	26S proteasome regulatory subunit 4 [OS=Mus musculus]	0	8.694	5	2	18	2	440	49.2	6.21	284	26.02	2	2	Pf00004, Pf00910, Pf01078, Pf05496, Pf05673, Pf05729, Pf07724, Pf07726, Pf07728, Pf13191, Pf13401	19179	Psmc1	ENSMUSG00000021178.8	1.04354e+06	1.79805e+06	497264	499245	733541	785032	284648	499245	1
High	Master Protein	P62242	40S ribosomal protein S8 [OS=Mus musculus]	0	44.279	45	9	96	9	208	24.2	10.32	1137	111.28	9	9	Pf01201	20116; 100040298	Rps8; Gm15501	ENSMUSG00000047675.15	7.55295e+06	1.08534e+07	7.72314e+06	5.76573e+06	5.30923e+06	4.73864e+06	4.42095e+06	5.76573e+06	1
High	Master Protein	P62259	14-3-3 protein epsilon [OS=Mus musculus]	0	61.038	44	12	150	10	255	29.2	4.74	1477	154.95	11	12	Pf00244	22627	Ywhae	ENSMUSG00000020849.13	1.73383e+07	2.95921e+07	1.37915e+07	1.4347e+07	1.21877e+07	1.292e+07	7.89465e+06	1.4347e+07	1	Acetyl [N-Term]
High	Master Protein	P62270	40S ribosomal protein S18 [OS=Mus musculus]	0	32.78	38	6	106	6	152	17.7	10.99	1482	115.61	6	6	Pf00416	20084	Rps18	ENSMUSG00000008668.14	1.35247e+07	1.79968e+07	1.06313e+07	9.94285e+06	9.50697e+06	7.85743e+06	6.08566e+06	9.94285e+06	1
High	Master Protein	P62281	40S ribosomal protein S11 [OS=Mus musculus]	0	33.861	38	6	117	6	158	18.4	10.3	1030	89.91	6	6	Pf00366	27207	Rps11	ENSMUSG00000003429.11	8.94011e+06	1.2721e+07	6.77704e+06	7.35703e+06	6.28431e+06	5.55404e+06	3.87937e+06	7.35703e+06	1
High	Master Protein	P62315	Small nuclear ribonucleoprotein Sm D1 [OS=Mus musculus]	0	7.326	20	2	16	2	119	13.3	11.56	145	18.32	2	2	Pf01423	20641	Snrpd1	ENSMUSG00000002477.4	1.19107e+06	1.65956e+06	1.28435e+06	546173	837241	724568	735200	546173	1
High	Master Protein	P62317	Small nuclear ribonucleoprotein Sm D2 [OS=Mus musculus]	0	14.298	33	4	26	4	118	13.5	9.91	277	25.8	4	4	Pf01423	107686	Snrpd2	ENSMUSG00000040824.3	1.62808e+06	2.93106e+06	1.64765e+06	1.05455e+06	1.14443e+06	1.27971e+06	943160	1.05455e+06	1
High	Master Protein	P62754	40S RIBOSOMAL PROTEIN S6 [OS=Mus musculus]	0	18.974	14	3	32	3	249	28.7	10.84	609	39.8	3	3	Pf01092	667739; 20104; 105244208	Rps6-ps4; Rps6; LOC105244208	ENSMUSG00000028495.14	2.4114e+06	3.66236e+06	2.40399e+06	2031646	1.69506e+06	1.599e+06	1.37611e+06	2031646	1
High	Master Protein	P62806	histone H4 [OS=Mus musculus]	0	140.436	55	10	659	10	103	11.4	11.36	9914	923.15	10	10	Pf00125, Pf02969, Pf15630	320332; 326619; 319160; 319155; 319158; 319161; 69386; 319157; 319159; 326620; 100041230; 319156; 97122; 102641229	Hist4h4; Hist1h4a; Hist1h4k; Hist1h4c; Hist1h4i; Hist1h4n; Hist1h4h; Hist1h4f; Hist1h4j; Hist1h4b; Hist1h4m; Hist1h4d; Hist2h4; LOC100862646; LOC102641229	ENSMUSG00000096010.2; ENSMUSG00000091405.2; ENSMUSG00000060981.6; ENSMUSG00000069274.3; ENSMUSG00000061482.6; ENSMUSG00000067455.5; ENSMUSG00000064288.4; ENSMUSG00000060678.4; ENSMUSG00000069306.5; ENSMUSG00000069305.3; ENSMUSG00000069266.5; ENSMUSG00000060093.6; ENSMUSG00000060639.5	9.23325e+08	1.69178e+09	1.23395e+09	8.11115e+08	649037265	7.38636e+08	7.06346e+08	8.11115e+08	1
High	Master Protein	P62814	V-type proton ATPase subunit B, brain isoform [OS=Mus musculus]	0	12.66	7	3	14	3	511	56.5	5.81	120	12.19	3	3	Pf00006, Pf00306, Pf02874	11966	Atp6v1b2	ENSMUSG00000006273.14	1.01428e+06	787296	523124	314186	712970	343736	299452	314186	1
High	Master Protein	P62830	60S ribosomal protein L23 [OS=Mus musculus]	0	21.141	31	3	41	3	140	14.9	10.51	249	47.3	3	3	Pf00238	65019; 100044627; 100862455	Rpl23; LOC100044627; LOC100862455	ENSMUSG00000071415.6	2.43385e+06	6.48673e+06	4.35338e+06	3.08437e+06	1.71084e+06	2.83212e+06	2.492e+06	3.08437e+06	1	Oxidation [K66]
High	Master Protein	P62843	40S ribosomal protein S15 [OS=Mus musculus]	0.001	3.927	8	1	4	1	145	17	10.39	20	4.92	1	1	Pf00203	20054	Rps15	ENSMUSG00000063457.14	2.15971e+06	4.08842e+06	1.93796e+06	1.50359e+06	1.51813e+06	1.78502e+06	1.10934e+06	1.50359e+06	1
High	Master Protein	P62855	40S ribosomal protein S26 [OS=Mus musculus]	0	15.1	34	3	23	3	115	13	11	277	26.04	2	3	Pf01283	27370; 100042812	Rps26; Rps26-ps1	ENSMUSG00000025362.6	2.28314e+06	2.96291e+06	2.77694e+06	1.24181e+06	1.6049e+06	1.29362e+06	1589602	1.24181e+06	1
High	Master Protein	P62900	60S ribosomal protein L31 [OS=Mus musculus]	0	10.369	18	2	34	2	125	14.5	10.54	528	48.45	2	2	Pf01198	114641	Rpl31	ENSMUSG00000073702.11	4.58258e+06	7.94992e+06	4.62578e+06	3.71678e+06	3.22125e+06	3.47096e+06	2.64793e+06	3.71678e+06	1
High	Master Protein	P62962	profilin-1 [OS=Mus musculus]	0	57.048	71	8	137	8	140	14.9	8.28	1425	147.01	8	8	Pf00235	18643	Pfn1	ENSMUSG00000018293.4	9.99868e+06	2.3831e+07	1.24091e+07	1.47747e+07	7.02842e+06	1.04047e+07	7.10334e+06	1.47747e+07	1	Oxidation [K108]
High	Master Protein	P63028	Translationally-controlled tumor protein [OS=Mus musculus]	0	17.99	15	2	24	2	172	19.5	4.86	213	22.98	2	2	Pf00838	22070	Tpt1	ENSMUSG00000060126.14	1.63497e+08	9.29926e+07	5.47662e+07	9.83157e+07	1.14927e+08	4.06008e+07	3.13498e+07	9.83157e+07	1	Oxidation [K112]
High	Master Protein	P63037	DnaJ homolog subfamily A member 1 [OS=Mus musculus]	0.009	1.735	3	1	3	1	397	44.8	7.08	0	0	1	1	Pf00226, Pf00684, Pf01556	15502	Dnaja1	ENSMUSG00000028410.13	246635	276568	128173	115323	173368	120750	73369.7	115323	1
High	Master Protein	P63038-1	60 kDa heat shock protein, mitochondrial [OS=Mus musculus]	0	91.047	27	12	151	12	573	60.9	6.18	2170	191.38	12	12	Pf00118	15510	Hspd1	ENSMUSG00000025980.14	1.00359e+07	1.12557e+08	1.26771e+07	9.97854e+06	7.05459e+06	4.91425e+07	7.25674e+06	9.97854e+06	1
High	Master Protein	P63087	serine/threonine-protein phosphatase PP1-gamma catalytic subunit [OS=Mus musculus]	0.001	4.258	3	1	14	1	323	37	6.54	168	8.45	1	1	Pf00149	19047; 434233	Ppp1cc; Gm5601	ENSMUSG00000004455.16	171147	425836	204834	138905	120305	185921	117253	138905	1
High	Master Protein	P63094	Guanine nucleotide-binding protein G(s) subunit alpha isoforms short [OS=Mus musculus]	0	8.029	6	2	9	1	394	45.6	5.96	22	12.55	1	2	Pf00025, Pf00503, Pf08477	14683	Gnas	ENSMUSG00000027523.19	196596	347482	234989	197220	138194	151711	134514	197220	1
High	Master Protein	P63101	14-3-3 protein zeta/delta [OS=Mus musculus]	0	72.4	53	11	157	7	245	27.8	4.79	1708	199.36	10	11	Pf00244	22631	Ywhaz	ENSMUSG00000022285.16	1.97005e+07	3.03832e+07	1.42668e+07	1.73248e+07	1.38481e+07	1.32654e+07	8.16673e+06	1.73248e+07	1	Oxidation [K3; P162]; Acetyl [N-Term]
High	Master Protein	P63323	40S ribosomal protein S12 [OS=Mus musculus]	0	8.737	27	3	16	3	132	14.5	7.24	89	7.35	3	3	Pf01248	20042	Rps12		1.03634e+06	2.31185e+06	1.59385e+06	1.19971e+06	728482	1.00936e+06	912368	1.19971e+06	1	Oxidation [P59]
High	Master Protein	P67778	Prohibitin [OS=Mus musculus]	0	8.073	12	3	12	3	272	29.8	5.76	33	0	3	3	Pf01145	18673	Phb	ENSMUSG00000038845.11	1.41081e+06	776388	591975	853708	991705	338973	338863	853708	1
High	Master Protein	P67984	60S ribosomal protein L22 [OS=Mus musculus]	0	13.815	9	2	16	2	128	14.8	9.19	200	21.54	2	2	Pf01776	19934; 100047372; 102642602	Rpl22; LOC100047372; LOC100504863; LOC102642602	ENSMUSG00000028936.15	2.47485e+06	4.89253e+06	3.35255e+06	2.04569e+06	1.73966e+06	2.13609e+06	1.9191e+06	2.04569e+06	1
High	Master Protein	P68040	Receptor of activated protein C kinase 1 [OS=Mus musculus]	0	65.703	41	12	132	12	317	35.1	7.69	1843	166.23	12	12	Pf00400	14694	Gnb2l1; Rack1	ENSMUSG00000020372.15	1.2334e+07	2.14052e+07	1.35015e+07	1.1053e+07	8.67003e+06	9.34558e+06	7.72865e+06	1.1053e+07	1
High	Master Protein	P68254-1	14-3-3 protein theta [OS=Mus musculus]	0	69.749	48	13	164	9	245	27.8	4.78	1685	174.05	12	13	Pf00244	22630; 102634437; 214444	Ywhaq; LOC102634437; Gm11226; Ywhaq-ps3; Cdk5rap2	ENSMUSG00000076432.12	4.47473e+07	4.89343e+07	2.81309e+07	4.00469e+07	3.14544e+07	2.13648e+07	1.61029e+07	4.00469e+07	1	Oxidation [K3; P162]; Acetyl [N-Term]
High	Master Protein	P68369	tubulin alpha-1A chain [OS=Mus musculus]	0	109.932	41	13	196	1	451	50.1	5.06	3338	274.51	13	13	Pf00091, Pf03953	22142	Tuba1a	ENSMUSG00000072235.5	542822	1.50032e+06	839991	740497	381568	655044	480835	740497	1
High	Master Protein	P68372	Tubulin beta-4B chain [OS=Mus musculus]	0	95.839	43	16	312	2	445	49.8	4.89	3388	326.31	14	16	Pf00091, Pf03953, Pf10644	227613	Tubb4b	ENSMUSG00000036752.4	2.3381e+06	4.69025e+06	1.92752e+06	2.1271e+06	1.64353e+06	2.04778e+06	1.10337e+06	2.1271e+06	1	Oxidation [P70; K324]
High	Master Protein	P68510	14-3-3 protein eta [OS=Mus musculus]	0	29.776	26	7	93	3	246	28.2	4.89	765	62.73	7	7	Pf00244	22629	Ywhah	ENSMUSG00000018965.11	1.94046e+06	3.95981e+06	1.43218e+06	1.71871e+06	1.36402e+06	1.72886e+06	819819	1.71871e+06	1
High	Master Protein	P70670	Nascent polypeptide-associated complex subunit alpha, muscle-specific form [OS=Mus musculus]	0	24.22	2	3	44	3	2187	220.4	9.35	979	68.98	3	3	Pf01849	17938	Naca	ENSMUSG00000061315.14	2.28586e+06	3.04938e+06	3.00824e+06	2.09903e+06	1.60681e+06	1.33137e+06	1.72201e+06	2.09903e+06	1
High	Master Protein	P70698	CTP synthase 1 [OS=Mus musculus]	0.007	1.939	2	1	2	1	591	66.6	6.58	18	0	1	1	Pf00117, Pf06418, Pf07722	51797	Ctps	ENSMUSG00000028633.7	1.7559e+06	3.64546e+06	1.57761e+06	1323454	1.23428e+06	1.59162e+06	903072	1323454	1
High	Master Protein	P80314	T-complex protein 1 subunit beta [OS=Mus musculus]	0	40.929	18	8	56	8	535	57.4	6.4	405	40.52	8	8	Pf00118	12461	Cct2	ENSMUSG00000034024.8	2.30395e+06	3.88165e+06	1.84083e+06	2.82914e+06	1.61953e+06	1.69474e+06	1.05374e+06	2.82914e+06	1	Oxidation [K248]
High	Master Protein	P80315	T-complex protein 1 subunit delta [OS=Mus musculus]	0	31.072	12	5	54	5	539	58	8.02	803	54.61	5	5	Pf00118	12464	Cct4	ENSMUSG00000007739.10	2.37277e+06	4.52669e+06	2.56663e+06	2.51838e+06	1.6679e+06	1.97637e+06	1.46922e+06	2.51838e+06	1
High	Master Protein	P80316	T-complex protein 1 subunit epsilon [OS=Mus musculus]	0	22.779	11	5	41	5	541	59.6	6.02	388	31.64	5	5	Pf00118	12465	Cct5	ENSMUSG00000022234.14	1.89162e+06	3.33119e+06	1.43064e+06	1.86695e+06	1.32969e+06	1.45441e+06	818938	1.86695e+06	1
High	Master Protein	P83917	Chromobox protein homolog 1 [OS=Mus musculus]	0	7.583	10	2	9	2	185	21.4	4.93	51	3.78	2	2	Pf00385, Pf01393	12412	Cbx1	ENSMUSG00000018666.13	329225	393146	498388	248341	231424	171649	285292	248341	1
High	Master Protein	P84096	Rho-related GTP-binding protein RhoG [OS=Mus musculus]	0	7.175	13	2	19	1	191	21.3	8.12	174	14.84	2	2	Pf00025, Pf00071, Pf04670, Pf08477	56212	Rhog	ENSMUSG00000073982.11	107911	290404	110624	130136	75854.1	126791	63324.5	130136	1
High	Master Protein	P84099	60S ribosomal protein L19 [OS=Mus musculus]	0	19.612	14	3	32	3	196	23.5	11.47	594	34.63	3	3	Pf01280	19921; 100041511	Rpl19; Rpl19-ps11	ENSMUSG00000017404.12	2.19842e+06	2.47516e+06	1.43548e+06	1.77676e+06	1.54534e+06	1.08066e+06	821711	1.77676e+06	1
High	Master Protein	P84104-1	Serine/arginine-rich splicing factor 3 [OS=Mus musculus]	0	28.67	29	4	22	3	164	19.3	11.65	279	31.96	4	4	Pf00076, Pf13893, Pf14259	20383	Srsf3	ENSMUSG00000071172.12	1.58777e+06	2.75897e+06	2.83131e+06	2.59645e+06	1.1161e+06	1.20458e+06	1.62072e+06	2.59645e+06	1
High	Master Protein	P84244	histone H3.3 [OS=Mus musculus]	0	28.559	25	6	246	6	136	15.3	11.27	1751	230.57	5	6	Pf00125, Pf15630	15078; 15081	H3f3a; H3f3b	ENSMUSG00000016559.14; ENSMUSG00000060743.12	5.9978e+08	7.24623e+08	4.97848e+08	4.2124e+08	4.21606e+08	316372288	2.84983e+08	4.2124e+08	1
High	Master Protein	P86048	60S ribosomal protein L10-like [OS=Mus musculus]	0	16.574	14	3	50	3	214	24.5	10.11	410	47.1	3	3	Pf00252	238217	Rpl10l	ENSMUSG00000060499.7	5.6486e+06	9.35734e+06	4.80639e+06	2.50314e+06	3.9706e+06	4.08544e+06	2.75132e+06	2.50314e+06	1
High	Master Protein	P97350	Plakophilin-1 [OS=Mus musculus]	0	23.801	6	4	64	4	728	80.8	8.91	1274	77.81	4	4	Pf00514	18772	Pkp1	ENSMUSG00000026413.12	3.38216e+06	1.94524e+06	5.16963e+06	2.23923e+06	2.37743e+06	849298	2.95925e+06	2.23923e+06	1
High	Master Protein	P97807-1	fumarate hydratase, mitochondrial [OS=Mus musculus]	0	16.52	6	2	22	2	507	54.3	9.04	201	24.89	2	2	Pf00206, Pf10415	14194	Fh1	ENSMUSG00000026526.14	950567	1.5811e+06	621318	765831	668186	690312	355660	765831	1
High	Master Protein	P99024	tubulin beta-5 chain [OS=Mus musculus]	0	115.573	43	16	338	2	444	49.6	4.89	4072	356.31	16	15	Pf00091, Pf03953, Pf10644	22154	Tubb5	ENSMUSG00000001525.10	6.41802e+07	1.0377e+08	1.00556e+08	6.21729e+07	4.51145e+07	4.53062e+07	5.75612e+07	6.21729e+07	1	Oxidation [P70; K324]
High	Master Protein	P99026	Proteasome subunit beta type-4 [OS=Mus musculus]	0	7.524	9	2	20	2	264	29.1	5.64	137	11.28	2	2	Pf00227	19172	Psmb4	ENSMUSG00000005779.12	926921	1.03051e+06	614567	738243	651565	449924	351796	738243	1	Oxidation [P49]
High	Master Protein	P99027	60S acidic ribosomal protein P2 [OS=Mus musculus]	0	72.621	77	7	86	7	115	11.6	4.54	1173	114.22	7	7	Pf00428	67186	Rplp2	ENSMUSG00000025508.13	6.89471e+06	1.07451e+07	9.00404e+06	6.41958e+06	4.84653e+06	4.69134e+06	5.15417e+06	6.41958e+06	1
High	Master Protein	Q00623	Apolipoprotein A-I [OS=Mus musculus]	0	23.855	23	6	47	6	264	30.6	5.73	378	46.06	6	6	Pf01442	11806	Apoa1	ENSMUSG00000032083.8	1.09837e+07	1.02361e+07	5.22886e+06	9.6364e+06	7.7208e+06	4.46913e+06	2.99315e+06	9.6364e+06	1
High	Master Protein	Q00PI9	heterogeneous nuclear ribonucleoprotein U-like protein 2 [OS=Mus musculus]	0	16.277	5	3	12	3	745	84.9	4.89	131	8.5	3	3	Pf00622, Pf02037, Pf13671	68693	Hnrnpul2	ENSMUSG00000071659.3	469625	312511	266613	312327	330116	136443	152617	312327	1
High	Master Protein	Q01149	Collagen alpha-2(I) chain [OS=Mus musculus]	0	28.665	13	9	26	9	1372	129.5	9.19	134	5.82	9	8	Pf01391, Pf01410	12843	Col1a2	ENSMUSG00000029661.16	584872	1.12659e+06	850847	82059.2	411126	491871	487049	82059.2	1	Oxidation [P116; P122; P126; P129; P234; P321; P327; P330; P332; P336; P338; P390; P398; P402; P459; P462; P600; P684; P690; P692; P957; P971; K980]
High	Master Protein	Q01320	DNA topoisomerase 2-alpha [OS=Mus musculus]	0	9.937	2	2	3	1	1528	172.7	8.6	46	2.53	1	2	Pf00204, Pf00521, Pf01751, Pf02449, Pf02518, Pf08070	21973	Top2a	ENSMUSG00000020914.17	327366	484677	425535		230117	211611	243588		1
High	Master Protein	Q01853	Transitional endoplasmic reticulum ATPase [OS=Mus musculus]	0	75.411	18	11	110	11	806	89.3	5.26	1665	133.06	11	11	Pf00004, Pf00910, Pf01057, Pf01078, Pf02359, Pf02933, Pf05496, Pf05673, Pf06068, Pf07724, Pf07726, Pf07728, Pf09336, Pf13191, Pf13207, Pf13401	269523	Vcp	ENSMUSG00000028452.7	6.20874e+06	1.30191e+07	5.89458e+06	7.4487e+06	4.36434e+06	5.6842e+06	3.37423e+06	7.4487e+06	1
High	Master Protein	Q02257	Junction plakoglobin [OS=Mus musculus]	0	173.255	33	22	348	21	745	81.7	6.14	4763	424.55	22	22	Pf00514	16480	Jup	ENSMUSG00000001552.14	3.59793e+07	1.86594e+07	5.92139e+07	3.89763e+07	2.52911e+07	8.14673e+06	3.38958e+07	3.89763e+07	1
High	Master Protein	Q03265	ATP synthase subunit alpha, mitochondrial [OS=Mus musculus]	0	94.717	33	17	266	17	553	59.7	9.19	4008	337.04	17	17	Pf00006, Pf00306, Pf02663, Pf02874, Pf05943	11946	Atp5a1	ENSMUSG00000025428.15	3.09301e+07	5.82876e+07	3.04471e+07	2.74934e+07	2.17418e+07	2.54485e+07	1.74288e+07	2.74934e+07	1
High	Master Protein	Q04750	DNA topoisomerase 1 [OS=Mus musculus]	0	11.67	4	3	9	3	767	90.8	9.33	66	4.48	3	3	Pf01028, Pf02919, Pf14370	21969	Top1	ENSMUSG00000070544.6	5.54621e+06	9.22495e+06	4.51801e+06	3.20397e+06	3.89862e+06	4.02764e+06	2.58624e+06	3.20397e+06	1
High	Master Protein	Q05816	Fatty acid-binding protein, epidermal [OS=Mus musculus]	0	21.124	53	4	32	4	135	15.1	6.54	323	35.36	4	4	Pf00061	16592	Fabp5	ENSMUSG00000027533.10	5.17413e+06	5.28203e+06	7.02594e+06	6.89238e+06	3.63707e+06	2.30615e+06	4.02185e+06	6.89238e+06	1	Oxidation [K40; P41]
High	Master Protein	Q05DA2	Sec62 protein [OS=Mus musculus]	0	3.126	7	1	2	1	136	16	9.94	32	0	1	1		69276	Sec62			217255	171578	188438		94854.2	98216.4	188438	1
High	Master Protein	Q07417	Short-chain specific acyl-CoA dehydrogenase, mitochondrial [OS=Mus musculus]	0	7.419	3	1	14	1	412	44.9	8.47	196	17.31	1	1	Pf00441, Pf02770, Pf02771, Pf08028	11409	Acads	ENSMUSG00000029545.13	254630	382080	272348	193339	178988	166817	155900	193339	1
High	Master Protein	Q07456	Protein AMBP [OS=Mus musculus]	0	18.415	11	3	10	3	349	39	6.32	118	7.53	3	3	Pf00014, Pf00061	11699	Ambp	ENSMUSG00000028356.4	282512	980652	651754	217596	198587	428155	373083	217596	1
High	Master Protein	Q08189	Protein-glutamine gamma-glutamyltransferase E [OS=Mus musculus]	0	24.146	4	3	37	3	693	77.3	6.81	589	40.15	3	3	Pf00868, Pf00927, Pf01841	21818	Tgm3	ENSMUSG00000027401.9	2.18099e+06	940843	1.89383e+06	3.99054e+06	1.53309e+06	410775	1.08408e+06	3.99054e+06	1	Oxidation [P579]
High	Master Protein	Q0VBK2	Keratin, type II cytoskeletal 80 [OS=Mus musculus]	0	6.453	4	2	18	2	452	50.6	6.27	172	21.61	2	2	Pf00038, Pf01496, Pf01576, Pf05557, Pf06160, Pf07888, Pf12128, Pf13514	74127	Krt80	ENSMUSG00000037185.8	2.28875e+06	1.42581e+06	2.02196e+06	1595398	1608842	622512	1.15743e+06	1595398	1
High	Master Protein	Q0VDM9	Krt78 protein [OS=Mus musculus]	0	44.473	5	4	214	2	492	54.7	6.19	4788	339.32	4	4	Pf00038, Pf01576, Pf02403, Pf04156, Pf05103, Pf05622, Pf07926, Pf09726, Pf11559, Pf11932, Pf12795, Pf13514, Pf14362	332131	Krt78		2.43109e+08	1.42306e+08	4.37048e+08	3.6096e+08	1.70889e+08	6.21311e+07	2.50179e+08	3.6096e+08	1	Oxidation [K122]
High	Master Protein	Q1JUQ6	FK506 binding protein12 [OS=Mus musculus]	0.001	4.5	21	1	5	1	62	7	7.4	57		1			14225	Fkbp1a		1.41063e+06	1.35818e+06	768438	751579	991584	592987	439876	751579	1
High	Master Protein	Q1WWK3	Hist1h1b protein [OS=Mus musculus]	0	6.605	7	1	2	1	222	22.4	10.92	45	2.43	1	1	Pf00538	56702	Hist1h1b		372059	88435.1	210522	71285.4	261533	38611	120509	71285.4	1
High	Master Protein	Q1WWL1	Atp1b3 protein [OS=Mus musculus]	0	5.997	9	1	4	1	134	15.1	8.91	47	5.29	1	1	Pf00287	11933	Atp1b3		388939	821677	301671	304040	273399	358747	172685	304040	1
High	Master Protein	Q3KQQ1	Nsfl1c protein [OS=Mus musculus]	0	7.695	7	2	10	2	369	40.6	5.15	62	4.75	2	2	Pf00789, Pf08059, Pf14555	386649	Nsfl1c		302604	1.12634e+06	298674	156036	212711	491763	170970	156036	1
High	Master Protein	Q3TCL2	Uncharacterized protein [OS=Mus musculus]	0	2.858	3	1	2	1	310	35	7.43	49	1.92	1	1	Pf00248	11677	Akr1b3		357309		223429	391852	251165		127897	391852	1
High	Master Protein	Q3TDF8	Uncharacterized protein [OS=Mus musculus]	0	6.423	3	1	12	1	437	49	5.71	160	14.65	1	1	Pf03463, Pf03464, Pf03465	225363	Etf1		207551	526417	364431	294216	145895	229835	208611	294216	1
High	Master Protein	Q3TE63	peptidyl-prolyl cis-trans isomerase [OS=Mus musculus]	0	64.47	63	7	147	7	164	17.9	7.9	1358	117.09	7	6	Pf00160	268373	Ppia		1.05291e+07	1.54805e+07	1.34895e+07	8.08791e+06	7.4013e+06	6.75882e+06	7.7218e+06	8.08791e+06	1	Oxidation [P58]
High	Master Protein	Q3TEA8-1	Heterochromatin protein 1-binding protein 3 [OS=Mus musculus]	0	9.191	5	3	24	3	554	60.8	9.7	96	2.76	3	3	Pf00538	15441	Hp1bp3	ENSMUSG00000028759.13	588216	807669	551494	390799	413478	352630	315691	390799	1
High	Master Protein	Q3TEK2	Uncharacterized protein [OS=Mus musculus]	0	220.71	40	25	445	21	646	70.8	5.41	6931	604.67	25	25	Pf00012, Pf02463, Pf06723	15481	Hspa8		5.74153e+07	7.86244e+07	5.30657e+07	6.24516e+07	4.03592e+07	3.43276e+07	3.03763e+07	6.24516e+07	1	Oxidation [K128]
High	Master Protein	Q3TET0	Uncharacterized protein [OS=Mus musculus]	0	21.315	8	4	42	4	544	59.6	7.84	658	43.76	4	4	Pf00118	12468	Cct7		1.55327e+06	2.8449e+06	950325	1.19522e+06	1.09185e+06	1.24209e+06	543994	1.19522e+06	1
High	Master Protein	Q3TF74	Coronin [OS=Mus musculus]	0	12.987	7	3	8	3	474	53.1	7.08	120	7.72	3	3	Pf00400, Pf08953, Pf08954	23790	Coro1c		258315	626194	107403	320269	181579	273398	61480.4	320269	1
High	Master Protein	Q3TF84	Uncharacterized protein [OS=Mus musculus]	0.001	5.103	6	1	8	1	186	20.4	6.67	117	11.26	1	1	Pf12799, Pf13855	98238	Lrrc59			805314	514943	323985		351602	294769	323985	1
High	Master Protein	Q3TFD0	Serine hydroxymethyltransferase [OS=Mus musculus]	0	3.035	3	2	8	2	501	55.4	8.47	32	3.4	2	2	Pf00464	108037	Shmt2	ENSMUSG00000025403.5	605448	683483	371180	451609	425590	298411	212474	451609	1
High	Master Protein	Q3TFD9	Uncharacterized protein [OS=Mus musculus]	0	287.732	69	39	685	2	466	53.7	5.1	8429	812.38	39	39	Pf00038, Pf04111, Pf04156, Pf04732, Pf05622, Pf10186	22352	Vim		1.40127e+08	2.65405e+08	1.27148e+08	1.81392e+08	9.85004e+07	1.15876e+08	7.27833e+07	1.81392e+08	1	Oxidation [K373]
Medium	Master Protein	Q3TFF0	Uncharacterized protein [OS=Mus musculus]	0.012	1.634	2	1	4	1	412	45.7	6.35	18	0	1	1	Pf00226, Pf00684, Pf01556	56445	Dnaja2		125969	156811	60208.2	130387	88548.2	68464	34464.9	130387	1
High	Master Protein	Q3TFP8	Uncharacterized protein [OS=Mus musculus]	0.001	2.77	5	1	6	1	175	19.7	4.84	71	5.37	1	1	Pf00173	53328	Pgrmc1		420812	693328	491353	377031	295803	302709	281265	377031	1
High	Master Protein	Q3TG92	Uncharacterized protein [OS=Mus musculus]	0	139.998	44	15	551	4	377	42	5.39	5338	622.17	15	14	Pf00022	11464	Actc1		6.41463e+06	1.26442e+07	5.83163e+06	9.49981e+06	4.50906e+06	5.52048e+06	3.33819e+06	9.49981e+06	1	Oxidation [K86; K217; K317; P324; K328]
High	Master Protein	Q3TGW0	Uncharacterized protein [OS=Mus musculus]	0	13.34	11	3	21	3	418	47.3	5.92	59	14.15	3	3	Pf00022	74117	Actr3		1.13262e+06	1.39873e+06	1.22951e+06	936773	796158	610688	703810	936773	1
High	Master Protein	Q3THE2	Myosin regulatory light chain 12B [OS=Mus musculus]	0	34.83	40	6	86	6	172	19.8	4.84	1279	80.61	6	6	Pf00036, Pf13202, Pf13405, Pf13833	67938	Myl12b	ENSMUSG00000034868.8	8.07109e+06	1.5884e+07	8.16944e+06	8.05351e+06	5.67345e+06	6.93498e+06	4.67642e+06	8.05351e+06	1
High	Master Protein	Q3THJ0	60S ribosomal protein L18a [OS=Mus musculus]	0	23.005	21	3	58	3	176	20.6	10.62	558	64.67	3	3	Pf01775, Pf06187	76808	Rpl18a		4.98727e+06	8.29821e+06	5.61842e+06	4.51804e+06	3.50572e+06	3.62302e+06	3.21615e+06	4.51804e+06	1
High	Master Protein	Q3THU8	Uncharacterized protein [OS=Mus musculus]	0	29.033	20	7	80	7	357	39.6	9.19	706	53.61	7	7	Pf00153	18674	Slc25a3		6.31439e+06	9.36858e+06	4.70138e+06	5.09417e+06	4.4386e+06	4.09035e+06	2.69121e+06	5.09417e+06	1
High	Master Protein	Q3THW5	Histone H2A.V [OS=Mus musculus]	0	16.939	31	4	85	2	128	13.5	10.58	877	93.48	4	4	Pf00125	77605	H2afv	ENSMUSG00000041126.16	1.19521e+06	2.81298e+06	6.36836e+06	1.37188e+06	840155	1.22815e+06	3.64543e+06	1.37188e+06	1
High	Master Protein	Q3TI99	L-lactate dehydrogenase [OS=Mus musculus]	0	47.153	26	9	99	8	332	36.5	7.74	1305	97.65	9	9	Pf00056, Pf02866	16828	Ldha		2.24886e+07	3.22507e+07	1.61666e+07	1.66074e+07	1.5808e+07	1.40807e+07	9.25421e+06	1.66074e+07	1
High	Master Protein	Q3TIC2	Uncharacterized protein [OS=Mus musculus]	0	11.319	14	2	4	1	196	22.2	5.53	71	4.9	2	2	Pf00025, Pf00071, Pf08477	11852	Rhob		267904	302873	285320	176196	188319	132235	163325	176196	1
High	Master Protein	Q3TIH9	Uncharacterized protein [OS=Mus musculus]	0	9.687	12	2	13	2	154	17.9	8.22	45	2.41	2	2	Pf00179	22195	Ube2l3		711225	1.47185e+06	461003	539652	499944	642612	263891	539652	1
High	Master Protein	Q3TIP8	chloride intracellular channel protein [OS=Mus musculus]	0	24.727	23	5	42	5	241	27.1	5.27	448	39.64	5	5	Pf00043, Pf13409, Pf13410, Pf13417	114584	Clic1		2.91888e+06	4.97e+06	1.8624e+06	2716235	2.05178e+06	2.16992e+06	1.06609e+06	2716235	1
High	Master Protein	Q3TIQ2	Uncharacterized protein [OS=Mus musculus]	0	42.859	43	5	97	5	165	17.8	9.42	1716	138.32	5	5	Pf00298, Pf03946	269261	Rpl12		6.02194e+06	1.00545e+07	6.98917e+06	5.42256e+06	4233031	4.38982e+06	4.00081e+06	5.42256e+06	1
High	Master Protein	Q3TIU3	Uncharacterized protein [OS=Mus musculus]	0	20.792	15	4	29	4	345	37.3	6.4	292	20.95	4	4	Pf00031	11625	Ahsg		1.26053e+06	3.56396e+06	845088	778528	886073	1.55603e+06	483753	778528	1	Oxidation [P334; P337]
High	Master Protein	Q3TJ52	Uncharacterized protein [OS=Mus musculus]	0	7.006	6	2	8	2	327	34.6	5.22	42	2.15	2	2	Pf00240, Pf00627, Pf09280, Pf11976, Pf13881	19359	Rad23b		524075	1.03499e+06	528490	228772	368391	451881	302523	228772	1
High	Master Protein	Q3TJ95	Clathrin light chain [OS=Mus musculus]	0.005	2.401	3	1	2	1	211	23.1	4.7	25	1.61	1	1	Pf01086	74325	Cltb		224593	226993	193073	187561	157874	99105.6	110521	187561	1
High	Master Protein	Q3TJB4	Uncharacterized protein [OS=Mus musculus]	0.007	1.947	2	1	4	1	368	41.5	5.72	16	1.71	1	1	Pf00018, Pf03114, Pf07653, Pf10455, Pf14604	20405	Sh3gl1		380893	762944	265641	305246	267743	333103	152060	305246	1
High	Master Protein	Q3TJD4	Uncharacterized protein [OS=Mus musculus]	0	7.453	7	2	28	2	256	28.9	9.26	216	27.16	2	2	Pf05405	11950	Atp5f1		1.69505e+06	3.10955e+06	1.3442e+06	1.45564e+06	1.19151e+06	1.35764e+06	769459	1.45564e+06	1
High	Master Protein	Q3TJK3	Uncharacterized protein [OS=Mus musculus]	0	87.895	29	11	122	11	417	46.5	8.5	1856	169.73	11	11	Pf00079	12406	Serpinh1		1.34388e+07	3.36735e+07	1.19426e+07	1.4195e+07	9.44663e+06	1.4702e+07	6.8363e+06	1.4195e+07	1	Oxidation [P29]
High	Master Protein	Q3TKD0	transportin-1 [OS=Mus musculus]	0	8.771	3	2	6	2	807	91.7	4.92	83	3.94	2	2	Pf03810, Pf13513	238799	Tnpo1	ENSMUSG00000009470.16		367988	222071	121213		160665	127120	121213	1
High	Master Protein	Q3TL95	Proteasome subunit alpha type [OS=Mus musculus]	0.001	4.114	4	1	6	1	249	27.9	7.33	95	3.98	1	1	Pf00227, Pf10584	26441	Psma4		771030		238068	557777	541983		136277	557777	1
High	Master Protein	Q3TMM5	Uncharacterized protein [OS=Mus musculus]	0	35.354	13	5	90	4	473	54.5	8.79	955	100.87	5	4	Pf00076, Pf08075, Pf13893, Pf14259	53610	Nono		3.99943e+06	6.86514e+06	4.27725e+06	2.77519e+06	2.81133e+06	2.99734e+06	2.44842e+06	2.77519e+06	1
High	Master Protein	Q3TN31	Proteasome subunit alpha type [OS=Mus musculus]	0	7.231	6	1	8	1	248	27.9	8.78	193	10.55	1	1	Pf00227, Pf10584	26444	Psma7		383020		397653	351306	269238		227628	351306	1
High	Master Protein	Q3TN39	Uncharacterized protein [OS=Mus musculus]	0.005	2.354	3	1	2	1	526	58.3	5.81	0	0	1	1	Pf00128	17254	Slc3a2		159063	388053		166558	111811	169425		166558	1
High	Master Protein	Q3TNK2	Uncharacterized protein [OS=Mus musculus]	0	19.838	8	4	16	4	606	66.3	6.73	245	20.12	4	4	Pf00400, Pf04762, Pf08662, Pf14783	22388	Wdr1		1.42317e+06	1.68971e+06	984121	1.27622e+06	1.0004e+06	737731	563340	1.27622e+06	1
High	Master Protein	Q3TNR3	Uncharacterized protein [OS=Mus musculus]	0	7.475	5	1	8	1	301	32.7	5.52	93	6.96	1	1	Pf00012	73442	Hspa12a		143863	327662	127838	145383	101126	143058	73178.1	145383	1
High	Master Protein	Q3TPC5	Serine/threonine-protein phosphatase 2A 55 kDa regulatory subunit B [OS=Mus musculus]	0	13.648	8	3	16	3	403	46.6	6.01	101	10.16	3	3		71978	Ppp2r2a		1.0757e+06	1.46847e+06	977105	839137	756143	641139	559323	839137	1
High	Master Protein	Q3TPL7	Uncharacterized protein [OS=Mus musculus]	0	37.548	17	8	70	1	427	49	5.5	671	72.05	8	8	Pf00270, Pf00271, Pf14617	68278	Ddx39		441075	500268	358863	264962	310047	218419	205424	264962	1
High	Master Protein	Q3TQP7	Uncharacterized protein [OS=Mus musculus]	0	28.629	14	4	26	4	424	44.8	8.35	366	30.59	4	4	Pf00108, Pf00109, Pf02803	110446	Acat1		132427	2.89891e+06	619730	373758	93087.5	1.26567e+06	354752	373758	1
High	Master Protein	Q3TR40	Uncharacterized protein [OS=Mus musculus]	0.001	4.031	1	1	2	1	1170	129.5	4.94	41	0	1	1	Pf00090, Pf00093, Pf02210, Pf02412, Pf05735, Pf12947, Pf14828	21825	Thbs1		83637.9	220724		55466.9	58791.9	96368.6		55466.9	1
High	Master Protein	Q3TR62	DNA topoisomerase 2 [OS=Mus musculus]	0	12.258	5	2	8	1	511	57.4	8.95	76	6.56	2	2	Pf00204, Pf02518, Pf13589	21974	Top2b		90613.9	465662	268057	205443	63695.6	203309	153444	205443	1
High	Master Protein	Q3TRG5	Uncharacterized protein [OS=Mus musculus]	0	3.421	5	1	8	1	261	28.1	6.57	25	3.59	1	1	Pf02893, Pf10349	22378	Wbp2		120268	247938	106317	97958.8	84540.4	108250	60858.8	97958.8	1
High	Master Protein	Q3TRH8	Uncharacterized protein [OS=Mus musculus]	0	15.076	11	2	30	2	260	29.2	6.57	495	31.3	2	2	Pf01115	12345	Capzb		1.87772e+06	2.17463e+06	1.07282e+06	1.25363e+06	1.31991e+06	949450	614114	1.25363e+06	1
High	Master Protein	Q3TS02	ATP-citrate synthase [OS=Mus musculus]	0.001	5.732	2	1	6	1	491	53.7	7.06	90	6.72	1	1	Pf08442	104112	Acly	ENSMUSG00000020917.17	149919	315148	127674	147143	105383	137595	73084.3	147143	1
High	Master Protein	Q3TTN3	Uncharacterized protein [OS=Mus musculus]	0	41.34	31	6	53	5	283	30.7	8.66	978	66.04	6	6	Pf01459	22335	Vdac3		2.11435e+06	3.92241e+06	1.86144e+06	2.04261e+06	1486248	1.71253e+06	1.06554e+06	2.04261e+06	1
High	Master Protein	Q3TTY5	Keratin, type II cytoskeletal 2 epidermal [OS=Mus musculus]	0	102.267	10	12	525	6	707	70.9	8.06	4504	615.56	12	12	Pf00038, Pf13166	16681	Krt2	ENSMUSG00000064201.8	6.4015e+08	3.21001e+08	6.88904e+08	6.8884e+08	4.49983e+08	1.4015e+08	3.94349e+08	6.8884e+08	1
High	Master Protein	Q3TUA1	Uncharacterized protein [OS=Mus musculus]	0	110.865	38	15	316	15	463	51	5.54	3667	360.81	15	15	Pf00013, Pf08067, Pf13014, Pf13083	15387	Hnrnpk		2.50841e+07	4.87026e+07	2.99829e+07	2.44513e+07	1.76324e+07	2.12637e+07	1.71631e+07	2.44513e+07	1
High	Master Protein	Q3TUR1	Uncharacterized protein [OS=Mus musculus]	0	3.325	1	1	10	1	705	80.6	8.1	51	3.83	1	1	Pf02516	16430	Stt3a		382555	535055		299044	268911	233607		299044	1
High	Master Protein	Q3TV47	Sodium/potassium-transporting ATPase subunit beta [OS=Mus musculus]	0	9.318	13	3	23	3	304	35.2	8.65	70	5.72	3	3	Pf00287	11931	Atp1b1		383523	930904	850411	370227	269591	406435	486800	370227	1
High	Master Protein	Q3TVZ1	catalase [OS=Mus musculus]	0	21.647	10	6	24	6	527	59.7	7.88	125	15.45	6	6	Pf00199, Pf06628	12359	Cat		2.37368e+06	2.07398e+06	2.53403e+06	1.4695e+06	1.66854e+06	905506	1.45055e+06	1.4695e+06	1
High	Master Protein	Q3TW40	Uncharacterized protein [OS=Mus musculus]	0	83.463	23	13	196	13	690	73.7	8.75	2683	199.79	13	13	Pf00076, Pf11532, Pf11608, Pf13893, Pf14259	76936	Hnrnpm		8.6146e+06	1.6853e+07	1.01558e+07	7.33957e+06	6.0555e+06	7.35807e+06	5.81346e+06	7.33957e+06	1	Oxidation [P554]
High	Master Protein	Q3TWF2	Uncharacterized protein [OS=Mus musculus]	0	175.742	36	25	360	23	655	72.4	5.22	5289	427.03	25	25	Pf00012, Pf01968, Pf06723	14828	Hspa5		4.02105e+07	5.15429e+07	2.86823e+07	28941637	2.82653e+07	2.25038e+07	1.64186e+07	28941637	1	Oxidation [K155]
High	Master Protein	Q3TX36	poly [ADP-ribose] polymerase [OS=Mus musculus]	0	8.345	3	2	9	2	1014	112.7	8.95	50	4.5	2	2	Pf00533, Pf00644, Pf00645, Pf02877, Pf05406, Pf08063	11545	Parp1		401108	773849	583383	416389	281953	337865	333945	416389	1
High	Master Protein	Q3TX45	Uncharacterized protein [OS=Mus musculus]	0	24.029	21	5	50	5	311	35.8	5.54	451	37.74	5	5	Pf01442, Pf02720	11816	Apoe		2.11385e+06	3.70876e+06	1.05049e+06	1.2602e+06	1.4859e+06	1.61926e+06	601331	1.2602e+06	1
High	Master Protein	Q3TXE5	Uncharacterized protein [OS=Mus musculus]	0	17.132	6	3	26	3	591	67.2	4.65	380	26.76	3	3	Pf00262	12330	Canx		1.41497e+06	3.07451e+06	1.63997e+06	1.46806e+06	994633	1.34234e+06	938769	1.46806e+06	1
High	Master Protein	Q3TXJ4	Uncharacterized protein [OS=Mus musculus]	0.005	2.356	4	1	4	1	198	22.3	7.03	48	1.64	1	1	Pf00025, Pf00503, Pf01926, Pf08477, Pf09439	20224	Sar1a		208122	56084.2		154346	146296	24486.5		154346	1
High	Master Protein	Q3TXS9	Uncharacterized protein [OS=Mus musculus]	0	34.005	23	6	96	6	293	31.2	10.18	928	104.16	6	6	Pf00333, Pf03719	16898	Rps2		7.94249e+06	1.38776e+07	7.27274e+06	6.17062e+06	5.58305e+06	6.05902e+06	4.16313e+06	6.17062e+06	1
High	Master Protein	Q3TZI3	Uncharacterized protein [OS=Mus musculus]	0.001	4.585	2	1	6	1	548	59.7	9.36	64	5.9	1	1	Pf00013, Pf13014	22668	Sf1			211451	125116	71430.6		92320.1	71619.8	71430.6	1
High	Master Protein	Q3TZP3	Uncharacterized protein [OS=Mus musculus]	0	10.434	5	2	4	2	668	75	9.72	68	2.84	2	2	Pf00249, Pf00320, Pf01426, Pf01448	23942	Mta2		283989	360436	430036	367626	199626	157367	246165	367626	1
High	Master Protein	Q3U094	Uncharacterized protein [OS=Mus musculus]	0	9.813	7	2	12	2	372	41	8.15	82	8.23	2	2	Pf00400	11867	Arpc1b		591994	1.68301e+06	528729	645853	416133	734809	302660	645853	1
High	Master Protein	Q3U0V1	Far upstream element-binding protein 2 [OS=Mus musculus]	0	22.183	11	4	36	4	748	76.7	7.33	263	31.96	4	4	Pf00013, Pf07650, Pf09005, Pf13014	16549	Khsrp	ENSMUSG00000007670.9	1.06152e+06	1.56615e+06	1.17015e+06	591740	746182	683787	669829	591740	1
High	Master Protein	Q3U292	Uncharacterized protein [OS=Mus musculus]	0	45.698	17	5	79	3	221	22.1	11.03	980	83.48	5	5	Pf00538	14957	Hist1h1d		5.01517e+06	6.11601e+06	6.44668e+06	1.93681e+06	3.52534e+06	2.67027e+06	3.69027e+06	1.93681e+06	1
High	Master Protein	Q3U3D3	Uncharacterized protein [OS=Mus musculus]	0	23.562	5	4	30	4	1263	140.1	7.77	330	24.53	4	4	Pf00043, Pf00133, Pf08264, Pf09334, Pf13603	22321	Vars		897941	1.98499e+06	865811	928401	631194	866654	495615	928401	1
High	Master Protein	Q3U4D1	Adenosylhomocysteinase [OS=Mus musculus]	0	10.035	4	2	10	2	432	47.7	6.54	113	10.07	2	2	Pf00670, Pf02254, Pf02826, Pf05221	11615	Gm4737		312835	404915	573683	274382	219902	176787	328393	274382	1
High	Master Protein	Q3U505	Uncharacterized protein [OS=Mus musculus]	0	20.668	10	3	22	3	659	72.1	6.49	201	25.43	3	3	Pf05817	20014	Rpn2		252182	1.12768e+06	472358	780528	177267	492348	270391	780528	1
High	Master Protein	Q3U5M8	Uncharacterized protein [OS=Mus musculus]	0	8.899	5	2	24	2	530	60.6	8.24	165	10.25	2	2	Pf01399, Pf08375	22123	Psmd3		347360	760795	310252	332963	244172	332165	177597	332963	1
High	Master Protein	Q3U6K9	phosphoserine aminotransferase [OS=Mus musculus]	0.001	3.703	4	1	2	1	367	40.2	7.65	32	1.65	1	1	Pf00266	107272	Psat1	ENSMUSG00000024640.9	250010	448491	240104	160518	175741	195812	137442	160518	1
High	Master Protein	Q3U6P5	Uncharacterized protein [OS=Mus musculus]	0	45.253	24	8	115	8	334	36.9	7.36	1672	131.58	7	8	Pf00076, Pf13893, Pf14259	15381	Hnrnpc		5.17506e+06	9.32245e+06	6.09701e+06	4.40457e+06	3.63773e+06	4.07021e+06	3.4901e+06	4.40457e+06	1
High	Master Protein	Q3U7N1	Uncharacterized protein [OS=Mus musculus]	0	14.984	26	4	40	4	145	17.2	10.46	358	29.22	4	4	Pf00467	19941	Rpl26		2.89821e+06	7.34336e+06	3.83347e+06	2.27734e+06	2.03725e+06	3.20613e+06	2.19439e+06	2.27734e+06	1
High	Master Protein	Q3U7N2	MICOS complex subunit Mic60 [OS=Mus musculus]	0.001	4.418	3	2	6	2	741	82.5	6.79	33	1.9	2	2	Pf09731	76614	Immt		4.80311e+06	5.18224e+06	3.26986e+06	2.14053e+06	3.37627e+06	2.26258e+06	1.87176e+06	2.14053e+06	1
High	Master Protein	Q3U890	Uncharacterized protein [OS=Mus musculus]	0	8.555	4	2	17	2	509	57.4	6	147	9.76	2	2	Pf00458, Pf00587, Pf03129, Pf13393	15115	Hars		761752	714169	670939	551370	535462	311808	384065	551370	1
High	Master Protein	Q3U9G9	Lamin-B receptor [OS=Mus musculus]	0	13.674	6	4	22	4	626	71.4	9.36	130	7.16	4	4	Pf01222, Pf09465	98386	Lbr	ENSMUSG00000004880.11	1.00162e+06	1.90023e+06	861439	840533	704072	829644	493113	840533	1
High	Master Protein	Q3U9N8	inosine-5'-monophosphate dehydrogenase [OS=Mus musculus]	0.007	1.829	2	1	2	1	514	55.7	7.28	0	0	1	1	Pf00478, Pf00571, Pf00977, Pf01070, Pf03060	23918	Impdh2		237867	324561	230888	161518	167205	141704	132167	161518	1
High	Master Protein	Q3U9P7	Succinyl-CoA:3-ketoacid-coenzyme A transferase [OS=Mus musculus]	0.007	1.943	3	1	2	1	520	56	8.53	0	0	1	1	Pf01144	67041	Oxct1		155584	189489		114959	109365	82731.4		114959	1
High	Master Protein	Q3U9Q8	Uncharacterized protein [OS=Mus musculus]	0	66.519	19	11	113	11	731	80.7	5.68	1561	136.27	11	11	Pf00626	227753	Gsn		1.31679e+07	1.72824e+07	6.48104e+06	1.0721e+07	9.25618e+06	7.54555e+06	3.70994e+06	1.0721e+07	1
High	Master Protein	Q3UAF6	Uncharacterized protein [OS=Mus musculus]	0	294.584	64	20	780	7	375	41.8	5.48	11845	1038.82	19	20	Pf00022	11461	Actb		5.4552e+08	7.57273e+08	2.86956e+08	4.65329e+08	3.83465e+08	3.30628e+08	1.64262e+08	4.65329e+08	1	Oxidation [K315; P322; K326; P367]
High	Master Protein	Q3UAZ3	Uncharacterized protein [OS=Mus musculus]	0	7.397	7	2	10	2	397	45.9	6.98	77	9.01	2	2	Pf00750, Pf05746	104458	Rars		74807.8	292970	96123	204143	52585	127911	55023.6	204143	1
High	Master Protein	Q3UB67	Uncharacterized protein [OS=Mus musculus]	0	61.042	25	9	87	9	403	46.1	10.18	890	91.61	9	9	Pf00297	27367	Rpl3		7.95582e+06	1.25964e+07	6.67032e+06	6.35903e+06	5.59242e+06	5.49961e+06	3.81828e+06	6.35903e+06	1
High	Master Protein	Q3UBU0	Uncharacterized protein [OS=Mus musculus]	0	102.42	21	18	237	16	802	92.4	4.82	3235	250.77	18	18	Pf00183, Pf02518, Pf13589	22027	Hsp90b1		1.84425e+07	3.33997e+07	1.41418e+07	1.58346e+07	1.29639e+07	1.45824e+07	8.09519e+06	1.58346e+07	1
High	Master Protein	Q3UBZ3	Uncharacterized protein [OS=Mus musculus]	0	24.913	17	4	28	3	286	33	5.85	470	31.69	4	4	Pf01267	12343	Capza2		2.8235e+06	3.49313e+06	1.92646e+06	2.29243e+06	1.98474e+06	1.52511e+06	1.10276e+06	2.29243e+06	1
High	Master Protein	Q3UCW4	Uncharacterized protein [OS=Mus musculus]	0.001	4.19	4	1	4	1	410	44.9	7.15	42	2.28	1	1	Pf00026, Pf07966, Pf14541, Pf14543	13033	Ctsd		569701		147077	125806	400462		84190.9	125806	1
High	Master Protein	Q3UE86	Uncharacterized protein [OS=Mus musculus]	0	22.472	7	4	20	4	702	79.3	5.86	349	21.08	4	4	Pf01055, Pf13802	14376	Ganab		679401	1.22033e+06	813325	688732	477574	532800	465571	688732	1
High	Master Protein	Q3UEB3-1	poly(U)-binding-splicing factor PUF60 [OS=Mus musculus]	0.007	1.973	2	1	2	1	564	60.2	5.29	0	0	1	1	Pf00076, Pf13893, Pf14259	67959	Puf60	ENSMUSG00000002524.15		189487	178123	34529.8		82730.7	101963	34529.8	1
High	Master Protein	Q3UFF9	ELAV-like protein [OS=Mus musculus]	0	23.601	21	5	30	5	326	36.1	8.9	344	32.38	5	5	Pf00076, Pf13893, Pf14259	15568	Elavl1		3.72487e+06	7.57544e+06	4.57068e+06	3.15033e+06	2.61834e+06	3.30746e+06	2.61639e+06	3.15033e+06	1
High	Master Protein	Q3UFI4	60S ribosomal protein L6 [OS=Mus musculus]	0	22.022	19	6	72	6	296	33.5	10.74	516	55	6	6	Pf01159, Pf03868	19988	Rpl6		7.82128e+06	2.21001e+07	6.47151e+06	5.39124e+06	5.49785e+06	9.64895e+06	3.70448e+06	5.39124e+06	1
High	Master Protein	Q3UFP7	Uncharacterized protein [OS=Mus musculus]	0	5.955	2	1	2	1	837	93.5	5.77	56	2.58	1	1	Pf00431, Pf00629, Pf00754	18186	Nrp1		414959	998958	313885	310694	291689	436148	179677	310694	1
High	Master Protein	Q3UFZ6	Uncharacterized protein [OS=Mus musculus]	0	12.041	7	2	22	2	337	37.6	4.75	476	25.99	2	2		53872	Caprin1		774411	2.2955e+06	1.18378e+06	993913	544360	1.00222e+06	677632	993913	1
Medium	Master Protein	Q3UG11	Uncharacterized protein [OS=Mus musculus]	0.015	1.576	2	1	6	1	315	37	4.63	49	3.31	1	1	Pf13499	12321	Calu		479803	943853	534572	415785	337270	412089	306004	415785	1
High	Master Protein	Q3UIH5	Uncharacterized protein [OS=Mus musculus]	0	10.975	8	3	26	3	433	48.6	5.95	129	10.48	3	3	Pf00004, Pf00158, Pf07724, Pf07726, Pf07728, Pf13191, Pf13401	19181	Psmc2		937163	1.40197e+06	592484	691778	658764	612102	339155	691778	1
High	Master Protein	Q3UIW3	Uncharacterized protein [OS=Mus musculus]	0.001	4.554	2	1	8	1	415	45.7	7.64	114	10.06	1	1	Pf01299	16784	Lamp2		555508	977290	500963	461152	390486	426688	286766	461152	1
High	Master Protein	Q3UJ44	Uncharacterized protein [OS=Mus musculus]	0	8.568	7	2	7	2	349	38.6	6.73	56	1.98	2	2	Pf00626	12332	Capg		96105.6	825728		116067	67556	360515		116067	1
High	Master Protein	Q3UJP4	T-complex protein 1 subunit gamma [OS=Mus musculus]	0	34.63	14	8	50	8	545	60.6	7.02	617	39.48	8	8	Pf00118	12462	Cct3		2.16238e+06	5.36062e+06	1.85965e+06	2.40273e+06	1.52001e+06	2.34046e+06	1.06452e+06	2.40273e+06	1
High	Master Protein	Q3UJS0	Uncharacterized protein [OS=Mus musculus]	0	33.948	19	6	79	6	257	28	10.96	873	80.94	6	6	Pf00181, Pf03947	26961	Rpl8		1.0929e+07	1.07454e+07	5.49596e+06	7.10517e+06	7.68236e+06	4.69148e+06	3.14605e+06	7.10517e+06	1
High	Master Protein	Q3UJU5	40S ribosomal protein S3a [OS=Mus musculus]	0	17.815	16	5	70	5	264	29.9	9.69	627	44.47	5	5	Pf01015	20091	Rps3a; Rps3a1		5.33623e+06	6.52465e+06	4.67137e+06	3.59676e+06	3.75102e+06	2.84868e+06	2.67403e+06	3.59676e+06	1
High	Master Protein	Q3UK30	Uncharacterized protein [OS=Mus musculus]	0	22.202	9	3	24	3	518	52.6	9.42	114	26.85	3	3	Pf00076, Pf00641, Pf13893, Pf14259	233908	Fus		1.0727e+06	2.80721e+06	2.11926e+06	627608	754039	1.22564e+06	1.21313e+06	627608	1
High	Master Protein	Q3UK83	Uncharacterized protein [OS=Mus musculus]	0	95.1	32	10	170	9	373	38.8	9.13	2483	206.81	10	10	Pf00076, Pf13893, Pf14259	15382	Hnrnpa1		1.21932e+07	2.74823e+07	1.64612e+07	1.0901e+07	8.57099e+06	1.19989e+07	9.42287e+06	1.0901e+07	1
High	Master Protein	Q3UKB1	Uncharacterized protein [OS=Mus musculus]	0	15.568	5	3	19	3	630	70.7	5.68	209	22.23	3	3	Pf00307, Pf13499	102866	Pls3		719157	1.66862e+06	771197	884923	505520	728525	441455	884923	1
High	Master Protein	Q3UKH3	Uncharacterized protein [OS=Mus musculus]	0	10.042	13	4	27	4	397	41.8	8.25	217	12.61	4	4	Pf00108, Pf02801, Pf02803	52538	Acaa2		870416	1.66095e+06	938269	950081	611845	725173	537092	950081	1	Oxidation [P160]
High	Master Protein	Q3ULG5	DNA helicase [OS=Mus musculus]	0	8.008	3	2	10	2	794	89.7	5.9	94	5.94	2	2	Pf00493, Pf01078, Pf07728, Pf14551	17219	Mcm6	ENSMUSG00000026355.11	275636	604677	256406	306322	193754	264004	146774	306322	1
High	Master Protein	Q3ULW0	GTP-binding nuclear protein RAN [OS=Mus musculus]	0	12.313	10	2	16	2	216	24.3	7.9	276	20.53	2	2	Pf00025, Pf00071, Pf08477	19384	Ran		1.74373e+06	1.0886e+06	2.67307e+06	866221	1.22573e+06	475284	1.53014e+06	866221	1
High	Master Protein	Q3UMI7	Uncharacterized protein [OS=Mus musculus]	0	108.083	25	21	262	20	858	95.3	6.93	2821	237.99	21	20	Pf00009, Pf00679, Pf03144, Pf03764, Pf14492	13629	Eef2		3.02402e+07	4.7437e+07	2.47695e+07	1.91493e+07	2.12569e+07	2.07111e+07	1.41788e+07	1.91493e+07	1	Oxidation [P376; P377]
High	Master Protein	Q3UNH3	Uncharacterized protein [OS=Mus musculus]	0	11.071	12	2	8	2	301	33.5	4.94	86	5.09	2	1	Pf00085, Pf06201, Pf13098	53382	Txnl1		191044		192538	104840	134291		110214	104840	1
High	Master Protein	Q3UR33	Uncharacterized protein [OS=Mus musculus]	0	48.828	28	9	73	9	452	50.3	9.41	1181	68.77	9	8	Pf03020, Pf08198	21917	Tmpo		3.40275e+06	7.91844e+06	3.83422e+06	3.17539e+06	2.39191e+06	3.45721e+06	2.19482e+06	3.17539e+06	1
High	Master Protein	Q3UUX9	Rab GDP dissociation inhibitor [OS=Mus musculus]	0	26.797	15	5	42	5	445	50.5	6.47	332	23.15	5	5	Pf00996	14569	Gdi2		3.03299e+06	5.05721e+06	2.68626e+06	2.82319e+06	2.13199e+06	2.20799e+06	1.53769e+06	2.82319e+06	1
High	Master Protein	Q3UV17	Keratin, type II cytoskeletal 2 oral [OS=Mus musculus]	0	131.033	19	18	389	5	594	62.8	8.43	3948	413.16	18	18	Pf00038, Pf01576, Pf10473	77055	Krt76	ENSMUSG00000075402.1	5.44667e+08	1.47408e+08	2.76596e+08	5.27917e+08	3.82865e+08	6.43589e+07	1.58332e+08	5.27917e+08	1	Oxidation [K353]
Medium	Master Protein	Q3UVK9	Uncharacterized protein [OS=Mus musculus]	0.019	1.395	6	1	1	1	332	37.5	6.61	0		1		Pf01108, Pf09294	15980	Ifngr2		1.22271e+07	5.5773e+06	2.04583e+07	18943720	8594879	2.43506e+06	11710941	18943720	1
High	Master Protein	Q3UW40	Uncharacterized protein [OS=Mus musculus]	0	10.47	14	2	14	2	160	18.2	11.05	212	16.22	2	2	Pf01246	68193	Rpl24		400891	756821	1.60986e+06	916653	281800	330430	921530	916653	1
High	Master Protein	Q3UWG5	tetraspanin [OS=Mus musculus]	0	8.038	8	1	2	1	236	25.8	5.83	57	2.61	1	1	Pf00335	12520	Cd81		114018	152609		169327	80147.1	66629.7		169327	1
High	Master Protein	Q3UWP8	Uncharacterized protein [OS=Mus musculus]	0	29.395	24	8	68	8	368	42.2	4.74	477	48.27	8	7	Pf00262	12317	Calr		8.6076e+06	1.80305e+07	7.82586e+06	7.54168e+06	6.05058e+06	7.87219e+06	4.47975e+06	7.54168e+06	1
High	Master Protein	Q3UXC2	Uncharacterized protein [OS=Mus musculus]	0	60.682	33	11	96	5	406	46.2	5.48	784	94.26	11	11	Pf00270, Pf00271, Pf04851	13681	Eif4a1		9.65342e+06	1.92568e+07	1.11018e+07	9.82406e+06	6.78572e+06	8.40757e+06	6.35502e+06	9.82406e+06	1
High	Master Protein	Q3UXI9	Uncharacterized protein [OS=Mus musculus]	0	13.973	8	2	6	2	390	43	5.14	81	7.04	2	2	Pf07528	67781	Ilf2		452754		309079	282365	318257		176926	282365	1
High	Master Protein	Q3UXP2	RuvB-like helicase [OS=Mus musculus]	0	15.227	13	5	34	5	463	51.1	5.64	247	23.92	5	5	Pf00004, Pf03796, Pf06068, Pf07726	20174	Ruvbl2		856042	1.50959e+06	594448	681402	601742	659093	340279	681402	1
High	Master Protein	Q3UXR4	Uncharacterized protein [OS=Mus musculus]	0	41.398	19	11	88	6	586	69.4	6.1	878	73.24	11	11	Pf00373, Pf00769, Pf09379, Pf09380	22350	Ezr		3.31044e+06	5.21943e+06	2.23168e+06	3.25912e+06	2.32702e+06	2.27882e+06	1.27748e+06	3.25912e+06	1
High	Master Protein	Q3UXV4	Serine/threonine-protein phosphatase [OS=Mus musculus]	0	3.065	3	1	2	1	452	51.4	5.81	20	1.88	1	1	Pf00149	19056	Ppp3cb		1.18834e+06	1.48174e+06	1.11611e+06	958346	835329	646930	638895	958346	1
High	Master Protein	Q3UYQ4	Uncharacterized protein [OS=Mus musculus]	0.001	4.334	2	1	8	1	524	59	7.34	123	9.54	1	1	Pf05918, Pf13646	11800	Api5		783229	1.11874e+06	690546	562976	550559	488444	395288	562976	1
High	Master Protein	Q3UZG3	Uncharacterized protein [OS=Mus musculus]	0	94.557	36	13	156	2	379	39.7	9.1	1887	158.18	10	13	Pf00076, Pf13893, Pf14259	229279	Hnrnpa3		1.37036e+07	3.42527e+07	1.97681e+07	1.18236e+07	9.63276e+06	1.49548e+07	1.13159e+07	1.18236e+07	1	Oxidation [K4]; Acetyl [N-Term]
High	Master Protein	Q3UZI0	Uncharacterized protein [OS=Mus musculus]	0	11.305	5	3	37	1	604	67.6	8.9	215	25.27	3	3	Pf00076, Pf13893, Pf14259	74326	Hnrnpr		144557	220704	155694	116184	101614	96360.1	89123.8	116184	1
High	Master Protein	Q3V2C6	Uncharacterized protein [OS=Mus musculus]	0	50.438	17	9	124	4	469	53.5	5.27	1797	144.47	9	9	Pf00038, Pf03962, Pf04732	13346	Des		1.3705e+06	3.56564e+06	2.21583e+06	2.65557e+06	963370	1.55677e+06	1.26841e+06	2.65557e+06	1
High	Master Protein	Q3V2S4	Uncharacterized protein [OS=Mus musculus]	0	308.179	69	39	699	2	466	53.7	5.12	9066	858.14	39	39	Pf00038, Pf04111, Pf04156, Pf04732, Pf05622, Pf10186	22352	Vim		1.08402e+06	2.34411e+06	1.32053e+06	1.1099e+06	761993	1.02345e+06	755907	1.1099e+06	1	Oxidation [K373]
Medium	Master Protein	Q3V3K3	Serine/threonine-protein kinase TAO3 [OS=Mus musculus]	0.012	1.624	2	1	6	1	438	53	9.19		13.19		1		330177	Taok3	ENSMUSG00000061288.13	2.60875e+07	1.42034e+07	3.78264e+07	47910892	18337776	6201235	21652916	47910892	1
High	Master Protein	Q497D7	Rpl30 protein [OS=Mus musculus]	0	40.261	52	4	60	4	114	12.6	9.55	958	90.08	4	4	Pf01248	19946	Rpl30		5.29859e+06	9.05046e+06	6.14013e+06	5.41431e+06	3.72456e+06	3.95146e+06	3.51479e+06	5.41431e+06	1
High	Master Protein	Q497E1	Ribosomal protein S23 [OS=Mus musculus]	0	9.57	15	2	18	2	143	15.8	10.37	340	20.78	2	2	Pf00164	66475	Rps23		1.67594e+06	1.70496e+06	1.08073e+06	1.34491e+06	1.17808e+06	744392	618641	1.34491e+06	1
High	Master Protein	Q497I4	Keratin, type I cuticular Ha5 [OS=Mus musculus]	0	25.811	13	6	89	4	455	50.5	4.97	1063	95.44	6	6	Pf00038	53617	Krt35	ENSMUSG00000048013.9	3.04349e+06	3.65493e+06	3.73283e+07	8.01918e+07	2.13937e+06	1.59575e+06	2.13678e+07	8.01918e+07	1
High	Master Protein	Q4FJX7	Lcn7 protein [OS=Mus musculus]	0	7.219	7	2	10	2	415	46.8	6.47	49	3.73	2	2	Pf00112, Pf01033	94242	Tinagl1			885553	421809	362092		386635	241456	362092	1
High	Master Protein	Q4FK88	Annexin [OS=Mus musculus]	0	62.332	27	11	80	11	346	38.7	7.72	1485	97.38	11	11	Pf00191	16952	Anxa1		1.23994e+07	1.12643e+07	4.25836e+06	1.5455e+07	8.71596e+06	4.91802e+06	2.43761e+06	1.5455e+07	1
Medium	Master Protein	Q4PJX1-1	Protein odr-4 homolog [OS=Mus musculus]	0.022	1.213	2	1	7	1	447	50	6.14	0	8.69	1	1	Pf00848, Pf14778	226499	BC003331	ENSMUSG00000006010.14	9.26747e+06	5.30773e+06	1.12875e+07	18019472	6514421	2317369	6.46127e+06	18019472	1
High	Master Protein	Q4V9X9	Rpl23a protein [OS=Mus musculus]	0	44.934	41	8	132	8	155	17.6	10.45	1082	118.25	8	8	Pf00276, Pf03939	268449	Rpl23a		6.09177e+06	1.30159e+07	1.01888e+07	5.98061e+06	4.28212e+06	5.6828e+06	5.83236e+06	5.98061e+06	1	Oxidation [K87]
High	Master Protein	Q4VA28	ribosomal protein L21 [OS=Mus musculus]	0	21.894	21	2	24	2	160	18.6	10.49	396	50.15	2	2	Pf01157	19933	Rpl21		2.23648e+06	4.1963e+06	3.09262e+06	1.85839e+06	1.5721e+06	1.83212e+06	1.77031e+06	1.85839e+06	1
High	Master Protein	Q501J6	Probable ATP-dependent RNA helicase DDX17 [OS=Mus musculus]	0	63.273	22	13	106	7	650	72.4	8.59	1342	96.81	13	13	Pf00270, Pf00271	67040	Ddx17		1.8739e+06	3.71324e+06	1.50836e+06	1.66233e+06	1.31723e+06	1.62121e+06	863432	1.66233e+06	1
High	Master Protein	Q52KC3	DNA helicase [OS=Mus musculus]	0.001	5.136	2	1	2	1	734	82.4	8.29	39	2.69	1	1	Pf00493, Pf07728, Pf14551	17218	Mcm5	ENSMUSG00000005410.6	209640	381305	266695	154952	147363	166479	152664	154952	1
High	Master Protein	Q52KG9	Chaperonin containing Tcp1, subunit 6a (zeta) [OS=Mus musculus]	0	26.228	13	6	31	6	531	58	6.9	209	29.29	6	6	Pf00118, Pf05504	12466	Cct6a		1.10233e+06	2.67315e+06	1.73635e+06	1.41194e+06	774867	1.16711e+06	993938	1.41194e+06	1
High	Master Protein	Q545F8	40S ribosomal protein S4 [OS=Mus musculus]	0	45.048	37	10	96	10	245	27.5	9.94	853	93.44	9	10	Pf00900, Pf08071	20102	Rps4x		9.40529e+06	1.89753e+07	1.04001e+07	1.04009e+07	6.6113e+06	8.28467e+06	5.95332e+06	1.04009e+07	1
High	Master Protein	Q54AH9	Beta-2-globin [OS=Mus musculus]	0	118.558	79	11	350	4	146	15.7	8.05	5731	481.19	11	11	Pf00042	15130	Hbb-b2		2.89321e+08	6.1732e+08	1.72175e+08	2.39586e+08	2.03374e+08	2.69524e+08	9.85579e+07	2.39586e+08	1	Oxidation [P36]
High	Master Protein	Q569Z0	ribosomal protein L14 [OS=Mus musculus]	0	25.957	24	5	85	1	216	23.5	11.02	803	66.29	5	5	Pf01929	100040970	Rpl14-ps1		5.93121e+06	8.35053e+06	5.60705e+06	4.539e+06	4.16925e+06	3.64586e+06	3.20964e+06	4.539e+06	1
High	Master Protein	Q571F9	mKIAA4115 protein [OS=Mus musculus]	0.001	4.575	2	1	4	1	505	56.1	6.46	40	3.97	1	1	Pf00076, Pf02136, Pf13893, Pf14259	27041	G3bp1		278823	867403	513901	232714	195994	378711	294172	232714	1
High	Master Protein	Q571M2	mKIAA4025 protein [OS=Mus musculus]	0	28.056	7	5	20	4	930	103.2	5.88	341	26.85	5	5	Pf00012, Pf06723	15525	Hspa4		1.22695e+06	2.23805e+06	1.49712e+06	1.83287e+06	862466	977138	856996	1.83287e+06	1
High	Master Protein	Q5D098	Proteasome subunit beta type [OS=Mus musculus]	0.003	2.521	3	1	4	1	276	29.7	7.99	0	0	1	1	Pf00227, Pf12465	19177	Psmb7		1.8758e+06	1.09012e+06	742348	2440000	1.31857e+06	475950	424942	2440000	1
High	Master Protein	Q5EBI8	ATP synthase, H+ transporting, mitochondrial F1F0 complex, subunit e [OS=Mus musculus]	0.001	5.338	17	1	12	1	71	8.2	8.44	133	15.39	1	1	Pf05680	11958	Atp5k		1.62673e+06	3.04154e+06	1.95711e+06	1.3037e+06	1.14349e+06	1.32794e+06	1.12031e+06	1.3037e+06	1
High	Master Protein	Q5FWB6	60S acidic ribosomal protein P0 [OS=Mus musculus]	0	75.37	44	10	122	10	317	34.2	6.25	1548	160.86	10	10	Pf00428, Pf00466	11837	Rplp0		1.03707e+07	2.06559e+07	1.08619e+07	1.00032e+07	7.28991e+06	9.01844e+06	6.21769e+06	1.00032e+07	1
High	Master Protein	Q5M9N5	ribosomal protein L28 [OS=Mus musculus]	0	12.628	28	4	28	4	137	15.7	12.02	155	17.41	4	4	Pf01778	19943	Rpl28		1.62409e+06	2.48448e+06	1.20321e+06	1.12795e+06	1.14163e+06	1.08473e+06	688754	1.12795e+06	1
High	Master Protein	Q5M9N6	Rpl37a protein [OS=Mus musculus]	0	20.811	46	3	65	3	82	9	10.37	413	31.87	3	3	Pf01780	19981	Rpl37a		2.23126e+06	2.79402e+06	1.59029e+06	1.87459e+06	1.56843e+06	1.21988e+06	910327	1.87459e+06	1	Oxidation [K62]
High	Master Protein	Q5M9N9	Prdx2 protein [OS=Mus musculus]	0	20.712	27	5	42	5	198	21.8	5.41	545	47.1	5	5	Pf00578, Pf08534, Pf10417	21672	Prdx2		1.41735e+07	1.5004e+07	1.41707e+07	1.17698e+07	9.96308e+06	6.55078e+06	8.11173e+06	1.17698e+07	1
High	Master Protein	Q5PR09	ribosomal protein L32 [OS=Mus musculus]	0	19.181	20	2	31	2	135	15.9	11.41	532	34.3	2	2	Pf01655	19951	Rpl32		833941	1.80479e+06	1.11249e+06	1.04007e+06	586206	787975	636821	1.04007e+06	1
High	Master Protein	Q5RKN9	Capping protein (actin filament) muscle Z-line, alpha 1 [OS=Mus musculus]	0	20.337	21	4	28	3	286	32.9	5.55	387	27.23	4	4	Pf01267	12340	Capza1	ENSMUSG00000070372.11	298590	774655	310637	436794	209889	338217	177817	436794	1
High	Master Protein	Q5RKP0	Vat1 protein [OS=Mus musculus]	0.001	4.779	8	2	3	2	401	42.5	6.37	22	2.14	1	2	Pf00107, Pf08240, Pf13602	26949	Vat1		6.22071e+06	1.47458e+07	9.15986e+06	4.60045e+06	4.37275e+06	6438039	5243367	4.60045e+06	1
High	Master Protein	Q5SF07	Insulin-like growth factor 2 mRNA-binding protein 2 [OS=Mus musculus]	0.001	4.638	2	1	10	1	592	65.5	8.03	114	5.79	1	1	Pf00013, Pf00076, Pf13014, Pf13893, Pf14259	319765	Igf2bp2	ENSMUSG00000033581.16	299517	555602	384735	221260	210541	242577	220234	221260	1
High	Master Protein	Q5SV64	Myosin-10 [OS=Mus musculus]	0	73.374	10	19	126	14	2007	232.3	5.54	944	76.09	19	19	Pf00063, Pf00769, Pf01496, Pf01576, Pf02736, Pf02841, Pf04111, Pf05622, Pf05667, Pf05911, Pf06637, Pf07888, Pf09726, Pf09731, Pf12128, Pf13094, Pf13514	77579	Myh10	ENSMUSG00000020900.15	3.34271e+06	9.62063e+06	3.79738e+06	3.75053e+06	2.3497e+06	4.20039e+06	2.17373e+06	3.75053e+06	1
High	Master Protein	Q5U222	Ddx5 protein [OS=Mus musculus]	0	56.544	21	13	92	7	648	72.9	9	1134	93.67	13	13	Pf00270, Pf00271, Pf08061	13207	Ddx5		6.06452e+06	1.42339e+07	1.02574e+07	6.84631e+06	4.26296e+06	6.21456e+06	5.87164e+06	6.84631e+06	1
High	Master Protein	Q5U405	Transmembrane protease serine 13 [OS=Mus musculus]	0	8.462	1	1	887	1	543	59.8	9.01	6401	887.28	1	1	Pf00089, Pf00530, Pf09272, Pf09342, Pf15494	214531	Tmprss13		6.1213e+08	5.56522e+08	2.11366e+08	4.57941e+08	4.30287e+08	2.42979e+08	1.20992e+08	4.57941e+08	1
High	Master Protein	Q5U445	cDNA sequence BC085271 [OS=Mus musculus]	0	18.337	12	3	40	3	289	33.3	4.36	391	33.29	3	3	Pf00956	100504508	BC085271		2.10353e+06	2.7124e+06	2.01209e+06	1.2575e+06	1.47864e+06	1.18424e+06	1.15178e+06	1.2575e+06	1
High	Master Protein	Q5XJF6	ribosomal protein [OS=Mus musculus]	0	25.42	21	4	58	4	217	24.8	9.94	456	58.86	4	4	Pf00687	19896; 100043141	Rpl10a; Rpl10a-ps1	ENSMUSG00000037805.14	6.40167e+06	9.20266e+06	5.97269e+06	5.45173e+06	4.49995e+06	4.01791e+06	3.41894e+06	5.45173e+06	1
High	Master Protein	Q5XJY5	Coatomer subunit delta [OS=Mus musculus]	0	5.958	5	3	11	3	511	57.2	6.21	73	7.56	3	3	Pf00928	213827	Arcn1	ENSMUSG00000032096.16	951571	1.6343e+06	719672	727323	668892	713542	411961	727323	1
High	Master Protein	Q60668-1	heterogeneous nuclear ribonucleoprotein D0 [OS=Mus musculus]	0	30.693	19	6	58	5	355	38.3	7.81	579	52	5	5	Pf00076, Pf13893, Pf14259	11991	Hnrnpd	ENSMUSG00000000568.15	6.05776e+06	1.00768e+07	5.98617e+06	5.26805e+06	4.25821e+06	4.39957e+06	3.42666e+06	5.26805e+06	1
High	Master Protein	Q60749	KH domain-containing, RNA-binding, signal transduction-associated protein 1 [OS=Mus musculus]	0	9.224	2	2	30	2	443	48.3	8.72	128	8.54	2	2	Pf00013, Pf13014	20218	Khdrbs1	ENSMUSG00000028790.13	1.05347e+06	2.03001e+06	1.23265e+06	763709	740523	886310	705604	763709	1
High	Master Protein	Q60864	stress-induced-phosphoprotein 1 [OS=Mus musculus]	0	6.334	2	1	4	1	543	62.5	6.8	62	5.08	1	1	Pf00515, Pf07719, Pf13414, Pf13424, Pf13432	20867	Stip1	ENSMUSG00000024966.8		314132	309717	310921		137151	177291	310921	1
High	Master Protein	Q60932-1	voltage-dependent anion-selective channel protein 1 [OS=Mus musculus]	0	80.664	48	11	123	10	296	32.3	8.43	1988	162.71	10	11	Pf01459	22333	Vdac1	ENSMUSG00000020402.11	1.20629e+07	2.40535e+07	1.22082e+07	1.06514e+07	8.47945e+06	1.05018e+07	6.98832e+06	1.06514e+07	1
High	Master Protein	Q61001	Laminin subunit alpha-5 [OS=Mus musculus]	0	115.796	10	25	173	25	3718	403.8	6.73	2091	147.29	25	25	Pf00052, Pf00053, Pf00054, Pf00055, Pf00529, Pf00769, Pf01576, Pf02210, Pf03302, Pf04156, Pf06008, Pf06009, Pf06188, Pf12718, Pf12795, Pf13514, Pf13779	16776	Lama5	ENSMUSG00000015647.9	1.3514e+07	2.33921e+07	2.66497e+07	1.70374e+07	9.49944e+06	1.02131e+07	1.5255e+07	1.70374e+07	1	Oxidation [P3236]
High	Master Protein	Q61074	Protein phosphatase 1G [OS=Mus musculus]	0	3.361	2	1	2	1	542	58.7	4.39	27	1.85	1	1	Pf00481	14208	Ppm1g	ENSMUSG00000029147.10	165430	238298	126609	148700	116286	104042	72474.5	148700	1
High	Master Protein	Q61166	Microtubule-associated protein RP/EB family member 1 [OS=Mus musculus]	0	9.321	10	2	20	2	268	30	5.22	83	17.87	2	2	Pf00307, Pf03271	13589	Mapre1	ENSMUSG00000027479.14	944877	2.77532e+06	1.10823e+06	288932	664187	1.21171e+06	634386	288932	1
High	Master Protein	Q61176	Arginase-1 [OS=Mus musculus]	0	7.917	6	2	17	2	323	34.8	7.01	148	18.24	2	2	Pf00491	11846	Arg1	ENSMUSG00000019987.9	2.0517e+06	990367	2.33553e+06	1.97164e+06	1.44221e+06	432397	1.33692e+06	1.97164e+06	1
High	Master Protein	Q61191	Host cell factor 1 [OS=Mus musculus]	0.001	4.119	1	1	2	1	2045	210.3	7.18	17	0	1	1	Pf01344, Pf13415, Pf13418, Pf13854, Pf13964	15161	Hcfc1	ENSMUSG00000031386.14	89006.1	294839	122286	110141	62565.4	128727	70000	110141	1
High	Master Protein	Q61292	laminin subunit beta-2 [OS=Mus musculus]	0	59.656	9	11	60	11	1799	196.5	6.67	631	47.56	11	11	Pf00053, Pf00055, Pf00769, Pf01442, Pf04012, Pf06008, Pf07111, Pf11740, Pf12128, Pf13514, Pf14662, Pf15558	16779	Lamb2	ENSMUSG00000052911.9	7.15668e+06	1.00499e+07	6.2279e+06	6.19e+06	5.03068e+06	4.38781e+06	3.56503e+06	6.19e+06	1
High	Master Protein	Q61391	Neprilysin [OS=Mus musculus]	0.002	2.638	2	1	2	1	750	85.6	5.81	0	0	1	1	Pf01431, Pf05649	17380	Mme	ENSMUSG00000027820.12	182652	272926		115794	128393	119160		115794	1
High	Master Protein	Q61495	Desmoglein-1-alpha [OS=Mus musculus]	0	25.658	4	5	107	5	1057	114.5	4.89	1076	112.2	5	5	Pf00028, Pf01049	13510	Dsg1a	ENSMUSG00000069441.3	3.21535e+06	2.29432e+06	6.10326e+06	3.6338e+06	2.26018e+06	1.00171e+06	3.49368e+06	3.6338e+06	1	Oxidation [P207]
High	Master Protein	Q61553	Fascin [OS=Mus musculus]	0	8.044	4	2	10	2	493	54.5	6.89	153	8.45	2	2	Pf06229, Pf06268	14086	Fscn1	ENSMUSG00000029581.14	218512	447597	218349	179916	153599	195422	124989	179916	1
High	Master Protein	Q61555	Fibrillin-2 [OS=Mus musculus]	0	12.484	2	4	12	4	2907	313.6	4.84	66	5.88	4	4	Pf00028, Pf00683, Pf06247, Pf07645, Pf12662, Pf12947, Pf14670	14119	Fbn2	ENSMUSG00000024598.8	259275	477897	177948	73157.4	182253	208651	101862	73157.4	1
High	Master Protein	Q61576	Peptidyl-prolyl cis-trans isomerase FKBP10 [OS=Mus musculus]	0.007	2.033	2	1	2	1	581	64.7	5.64	26	0	1	1	Pf00254, Pf13499	14230	Fkbp10	ENSMUSG00000001555.10	134559	38214.1		23858.6	94586	16684.4		23858.6	1
High	Master Protein	Q61584	Fragile X mental retardation syndrome-related protein 1 [OS=Mus musculus]	0	6.237	3	2	12	2	677	76.2	6.98	126	5.54	2	2	Pf00013, Pf05641, Pf12235, Pf13014	14359	Fxr1	ENSMUSG00000027680.15	313966	556192	317403	279972	220697	242835	181691	279972	1
High	Master Protein	Q61686	chromobox protein homolog 5 [OS=Mus musculus]	0	15.586	17	3	21	3	191	22.2	5.86	125	7.64	3	3	Pf00385, Pf01393	12419	Cbx5	ENSMUSG00000009575.14	171048	551689	616024	318740	120236	240869	352630	318740	1
High	Master Protein	Q61696	heat shock 70 kDa protein 1A [OS=Mus musculus]	0	25.726	10	4	67	1	641	70	5.72	1101	87.69	4	4	Pf00012, Pf06723	193740; 15511	Hspa1a; Hspa1b	ENSMUSG00000091971.3	547222	169663	189666	271068	384661	74075.4	108570	271068	1
High	Master Protein	Q61703	Inter-alpha-trypsin inhibitor heavy chain H2 [OS=Mus musculus]	0.001	4.366	2	1	4	1	946	105.9	7.27	43	4.04	1	1	Pf00092, Pf06668, Pf08487, Pf10138, Pf13519, Pf13768	16425	Itih2		797025	1.13979e+06	707634	497527	560256	497635	405070	497527	1
High	Master Protein	Q61739-1	integrin alpha-6 [OS=Mus musculus]	0	10.053	4	3	16	3	1091	122.1	7.03	86	3.77	3	3	Pf01839, Pf08441, Pf13517, Pf14312	16403	Itga6	ENSMUSG00000027111.15	98626.6	293481	107220	73777.9	69328	128135	61375.6	73777.9	1
High	Master Protein	Q61753	D-3-phosphoglycerate dehydrogenase [OS=Mus musculus]	0	27.536	11	5	54	5	533	56.5	6.54	852	68.07	5	5	Pf00389, Pf02826	236539	Phgdh	ENSMUSG00000053398.11	7.60556e+06	9.6205e+06	5.70844e+06	7.29649e+06	5.34621e+06	4.20034e+06	3.26768e+06	7.29649e+06	1
High	Master Protein	Q61765	Keratin, type I cuticular Ha1 [OS=Mus musculus]	0	48.725	25	11	107	5	416	47.1	4.89	1153	116.54	11	10	Pf00038, Pf01576, Pf13514	16660	Krt31	ENSMUSG00000048981.1	2.21926e+06	2.21341e+06	8.39564e+07	4.54669e+06	1.56e+06	966379	4.80591e+07	4.54669e+06	1
High	Master Protein	Q61768	Kinesin-1 heavy chain [OS=Mus musculus]	0	7.231	3	2	22	2	963	109.5	6.44	180	9.72	2	2	Pf00225, Pf01576, Pf02463, Pf03999, Pf04111, Pf04156, Pf05483, Pf05557, Pf05622, Pf06160, Pf07111, Pf07888, Pf10174, Pf12128, Pf13514, Pf14915	16573	Kif5b	ENSMUSG00000006740.13	221992	704800	182937	162366	156046	307718	104718	162366	1
High	Master Protein	Q61781	Keratin, type I cytoskeletal 14 [OS=Mus musculus]	0	256.299	37	24	1056	2	484	52.8	5.17	16385	1305.86	22	23	Pf00038, Pf13514	16664	Krt14	ENSMUSG00000045545.8	8.51664e+08	1.75227e+08	4.22038e+08	8.74963e+08	5.98664e+08	76504565	2.41587e+08	8.74963e+08	1	Oxidation [K15]
High	Master Protein	Q61782	Type I epidermal keratin mRNA, 3'end [OS=Mus musculus]	0	84.687	66	8	184	3	93	10.7	6.3	3015	301.85	7	8	Pf00038				2.16749e+07	1.33116e+07	4.45523e+07	3.11901e+07	1.5236e+07	5.81189e+06	2.5503e+07	3.11901e+07	1
High	Master Protein	Q61838	Pregnancy zone protein [OS=Mus musculus]	0.001	3.736	1	1	5	1	1495	165.7	6.68	30	1.92	1	1	Pf00207, Pf01835, Pf07677, Pf07678, Pf07703, Pf10569, Pf11974, Pf13249	11287	Pzp	ENSMUSG00000030359.14		490849	266102	314604		214306	152325	314604	1
High	Master Protein	Q61937	Nucleophosmin [OS=Mus musculus]	0	11.344	7	2	34	2	292	32.5	4.77	299	26.12	2	2	Pf03066	18148	Npm1	ENSMUSG00000057113.13	3.69606e+06	6.97124e+06	3.36416e+06	3.06201e+06	2.59809e+06	3.04367e+06	1.92575e+06	3.06201e+06	1
High	Master Protein	Q61990	Poly(rC)-binding protein 2 [OS=Mus musculus]	0	30.123	19	5	66	3	362	38.2	6.79	670	49.22	5	5	Pf00013, Pf13014	18521	Pcbp2	ENSMUSG00000056851.13	1.76298e+06	3.03808e+06	2.13317e+06	1.50308e+06	1239257	1.32643e+06	1.22109e+06	1.50308e+06	1
High	Master Protein	Q62048-1	Astrocytic phosphoprotein PEA-15 [OS=Mus musculus]	0.001	4.246	8	1	4	1	130	15	5.02	46	0	1	1	Pf01335	18611	Pea15a	ENSMUSG00000013698.12	179855	350528	165975	137477	126427	153042	95009	137477	1
High	Master Protein	Q62148	retinal dehydrogenase 2 [OS=Mus musculus]	0	15.858	8	3	6	3	518	56.6	5.74	110	6.6	3	3	Pf00171, Pf05893	19378	Aldh1a2	ENSMUSG00000013584.5	508604	286161	368938	211620	357515	124939	211191	211620	1
High	Master Protein	Q62261-1	Spectrin beta chain, non-erythrocytic 1 [OS=Mus musculus]	0	60.643	7	14	99	14	2363	274.1	5.58	1018	83.1	13	14	Pf00169, Pf00307, Pf00435, Pf11971, Pf12128, Pf15410	20742	Spnb2; Sptbn1	ENSMUSG00000020315.18	5.80038e+06	1.01885e+07	5.21934e+06	4.80728e+06	4.07728e+06	4.44833e+06	2.9877e+06	4.80728e+06	1
High	Master Protein	Q62318	Transcription intermediary factor 1-beta [OS=Mus musculus]	0	33.618	11	6	34	6	834	88.8	5.77	168	15.3	6	6	Pf00628, Pf00643	21849	Trim28	ENSMUSG00000005566.14	588061	1.21549e+06	656172	592373	413368	530687	375612	592373	1	Oxidation [P421; P423]
High	Master Protein	Q62348	Translin [OS=Mus musculus]	0.005	2.387	4	1	2	1	228	26.2	6.44	27	0	1	1	Pf01997	22099	Tsn	ENSMUSG00000026374.14	110268	82396.9		64781.4	77511.4	35974.7		64781.4	1
High	Master Protein	Q62425	Cytochrome c oxidase subunit NDUFA4 [OS=Mus musculus]	0	8.697	24	2	16	2	82	9.3	9.52	204	11.07	2	2	Pf06522	17992	Ndufa4	ENSMUSG00000029632.7	461777	900164	307127	506247	324599	393014	175808	506247	1
High	Master Protein	Q62470	Integrin alpha-3 [OS=Mus musculus]	0	20.63	4	4	34	4	1053	116.7	6.57	549	31.27	4	4	Pf01839, Pf08441, Pf13517	16400	Itga3	ENSMUSG00000001507.16	1.70973e+06	3.62579e+06	1.45828e+06	1.74854e+06	1.20183e+06	1.58303e+06	834763	1.74854e+06	1
High	Master Protein	Q64012	RNA-binding protein Raly [OS=Mus musculus]	0	6.218	6	2	4	2	312	33.2	8.84	38	2.86	2	2	Pf00076, Pf13893, Pf14259	19383	Raly	ENSMUSG00000027593.15	2.41614e+06	2.80568e+06	1.66303e+06	1.53818e+06	1.69839e+06	1.22497e+06	951966	1.53818e+06	1
High	Master Protein	Q64105	Sepiapterin reductase [OS=Mus musculus]	0	3.171	6	1	2	1	261	27.9	5.74	27	0	1	1	Pf00106, Pf08659	20751	Spr		162915	168910		116708	114518	73746.5		116708	1
High	Master Protein	Q641N3	Rps16 protein [OS=Mus musculus]	0	24.345	32	5	74	5	157	17.5	10.21	686	79.75	5	5	Pf00380	100039355	Rps16-ps2		8.26713e+06	1.49566e+07	9.12507e+06	6.14568e+06	5.81125e+06	6.53007e+06	5.22345e+06	6.14568e+06	1
High	Master Protein	Q642K1	ribosomal protein L18 [OS=Mus musculus]	0	35.133	34	7	82	7	188	21.6	11.84	1093	102.76	7	7	Pf00828	19899	Rpl18		1.17803e+07	1.73966e+07	1.10232e+07	8.4846e+06	8.28079e+06	7.5954e+06	6.31001e+06	8.4846e+06	1
High	Master Protein	Q64475	Histone H2B type 1-B [OS=Mus musculus]	0	47.588	41	6	292	3	126	13.9	10.32	3447	302.25	6	6	Pf00125, Pf00808	319178	Hist1h2bb	ENSMUSG00000075031.3	3.02092e+08	2.58528e+08	3.3298e+08	1.8403e+08	2.12351e+08	1.12874e+08	1.90608e+08	1.8403e+08	1
High	Master Protein	Q64523	Histone H2A type 2-C [OS=Mus musculus]	0	45.922	38	5	151	1	129	14	10.9	2301	219.81	5	5	Pf00125, Pf00808	319176	Hist2h2ac	ENSMUSG00000068855.3	1.21872e+07	7.56339e+06	1.26907e+07	4.59351e+06	8.56684e+06	3.3022e+06	7.26454e+06	4.59351e+06	1
High	Master Protein	Q64524	Histone H2B type 2-E [OS=Mus musculus]	0	40.736	36	4	162	1	126	14	10.32	2292	197.98	4	4	Pf00125	319190	Hist2h2be	ENSMUSG00000068854.7	518379	199244	253910	122491	364387	86990.7	145345	122491	1
High	Master Protein	Q64727	Vinculin [OS=Mus musculus]	0	98.661	26	22	119	22	1066	116.6	6	1164	102.75	22	22	Pf01044	22330	Vcl	ENSMUSG00000021823.9	1.37777e+07	2.712e+07	1.2228e+07	1.04338e+07	9.68479e+06	1.18407e+07	6.99966e+06	1.04338e+07	1	Oxidation [P536; P796]
High	Master Protein	Q66JR8	PTMS protein [OS=Mus musculus]	0	8.578	9	2	19	1	211	23.1	4.79	155	18.09	2	2					359944	331419	447975	223011	253017	144699	256434	223011	1
High	Master Protein	Q66K11	COL6A3 protein [OS=Mus musculus]	0.001	5.517	3	1	10	1	373	39.2	10.08	133	8.41	1	1	Pf00014, Pf00041	12835	Col6a3		117093	318646	125379	117223	82309	139122	71770.7	117223	1
High	Master Protein	Q68FF6	ARF GTPase-activating protein GIT1 [OS=Mus musculus]	0.005	2.189	2	1	2	1	770	85.2	6.93	0	1.75	1	1	Pf00023, Pf01412, Pf08518, Pf12205, Pf12796, Pf13637, Pf13857	216963	Git1	ENSMUSG00000011877.13	405263	183595	461708	575609	284873	80158.2	264295	575609	1
Medium	Master Protein	Q6A074	mKIAA0400 protein [OS=Mus musculus]	0.012	1.648	1	1	41	1	970	107.7	6.71	141	33.21	1	1	Pf00018, Pf00023, Pf00169, Pf01412, Pf07653, Pf12796, Pf13637, Pf13857, Pf14604	211914	Asap2		9.54973e+07	4.46766e+07	1.11752e+08	106367992	6.71284e+07	1.95059e+07	63969964	106367992	1
High	Master Protein	Q6A0C9	MKIAA0109 protein [OS=Mus musculus]	0	6.454	5	2	12	2	436	49.6	9.54	43	1.88	2	2	Pf00928	11773	Ap2m1		337096	579771	253252	383533	236957	253130	144969	383533	1
High	Master Protein	Q6GQT1	Alpha-2-macroglobulin-P [OS=Mus musculus]	0	11.187	2	3	10	3	1474	164.2	6.61	120	8.18	3	3	Pf00207, Pf01835, Pf07677, Pf07678, Pf07703, Pf10569, Pf11974, Pf13249	232345	A2m	ENSMUSG00000030111.9	1.16187e+06	2.83117e+06	108514	950946	816716	1.2361e+06	62116.4	950946	1
High	Master Protein	Q6IFX2	Keratin, type I cytoskeletal 42 [OS=Mus musculus]	0	203.726	35	22	685	5	452	50.1	5.16	9980	948.11	21	22	Pf00038, Pf04156, Pf08317, Pf13166, Pf13514	68239	Krt42	ENSMUSG00000053654.7	1.5295e+08	1.11702e+08	2.39622e+08	4.50406e+08	1.07514e+08	4.87696e+07	1.37166e+08	4.50406e+08	1
High	Master Protein	Q6IFZ6	Keratin, type II cytoskeletal 1b [OS=Mus musculus]	0	61.586	10	8	488	2	572	61.3	8.02	6306	538.99	8	8	Pf00038, Pf09728, Pf13166	406220	Krt77	ENSMUSG00000067594.5	1.31957e+07	1.60298e+06	1.5111e+06	1.84457e+06	9.27574e+06	699865	865000	1.84457e+06	1
High	Master Protein	Q6IFZ8	MCG1050941 [OS=Mus musculus]	0	83.921	12	10	166	2	552	60.2	7.3	2296	237.42	10	10	Pf00038, Pf04156, Pf13166	406223	Gm5414	ENSMUSG00000064232.2	1.08971e+06	618852	1.90445e+06	7.41748e+06	765993	270193	1.09016e+06	7.41748e+06	1
High	Master Protein	Q6IME9	Keratin, type II cytoskeletal 72 [OS=Mus musculus]	0	74.934	9	7	264	1	520	56.7	7.4	2939	348.18	6	7	Pf00038, Pf01576, Pf09728, Pf12128, Pf13514	105866	Krt72; Krt72-ps	ENSMUSG00000056605.6	5.80751e+06	2.16893e+06	8.53231e+06	4.51308e+06	4.0823e+06	946960	4.88414e+06	4.51308e+06	1	Oxidation [K252]
High	Master Protein	Q6IRU2	Tropomyosin alpha-4 chain [OS=Mus musculus]	0	26.454	18	5	41	4	248	28.5	4.68	670	41.58	5	5	Pf00261, Pf12718	326618	Tpm4	ENSMUSG00000031799.9	1.72245e+06	3.15618e+06	1.95023e+06	1.60345e+06	1.21077e+06	1.378e+06	1.11637e+06	1.60345e+06	1
High	Master Protein	Q6NV50	Catenin (Cadherin associated protein), alpha 1 [OS=Mus musculus]	0	22.934	7	5	29	5	906	100	6.23	262	23.53	5	5	Pf01044	12385	Ctnna1		875207	1.66078e+06	646036	572943	615213	725102	369810	572943	1
High	Master Protein	Q6NVD0	FRAS1-related extracellular matrix protein 2 [OS=Mus musculus]	0.007	1.956	0	1	11	1	3160	350.4	5.12	0	0	1	1	Pf03160	242022	Frem2	ENSMUSG00000037016.11	182642	312292	103471	159045	128385	136348	59229.9	159045	1
High	Master Protein	Q6NXH9	Keratin, type II cytoskeletal 73 [OS=Mus musculus]	0	54.371	13	9	436	2	539	58.9	8.09	6225	511.96	9	9	Pf00038, Pf01576, Pf03962, Pf04156, Pf08614, Pf09728, Pf09763, Pf11559, Pf12128, Pf13514	223915	Krt73	ENSMUSG00000063661.5	7.56923e+08	4.54899e+08	1.03558e+09	6.58084e+08	5.32067e+08	1.9861e+08	5.92796e+08	6.58084e+08	1
High	Master Protein	Q6P069-1	Sorcin [OS=Mus musculus]	0	7.117	15	3	19	3	198	21.6	5.59	40	5.52	3	3	Pf13405, Pf13499, Pf13833	109552	Sri	ENSMUSG00000003161.15	985837	1.56105e+06	848428	580934	692979	681558	485665	580934	1
High	Master Protein	Q6P5F9	Exportin-1 [OS=Mus musculus]	0.001	4.316	1	1	2	1	1071	123	6.07	27	1.79	1	1	Pf03810, Pf08389, Pf08767	103573	Xpo1	ENSMUSG00000020290.14	86328.1	207399		84294	60683	90550.9		84294	1
High	Master Protein	Q6P5H2-1	Nestin [OS=Mus musculus]	0	33.728	5	7	23	7	1864	207	4.34	345	20.65	6	7	Pf00038, Pf02463	18008	Nes	ENSMUSG00000004891.16	1.70226e+06	4.8105e+06	906131	1.85408e+06	1.19658e+06	2.10028e+06	518696	1.85408e+06	1
High	Master Protein	Q6P8K8	Carboxypeptidase A4 [OS=Mus musculus]	0.007	2.075	2	1	4	1	420	47.3	6.61	44	0	1	1	Pf00246, Pf02244	71791	Cpa4	ENSMUSG00000039070.5	719296		361877	437744	505618		207149	437744	1
High	Master Protein	Q6PE01	U5 small nuclear ribonucleoprotein 40 kDa protein [OS=Mus musculus]	0.008	1.778	4	1	2	1	358	39.3	8.1	14	0	1	1	Pf00400	66585	Snrnp40	ENSMUSG00000074088.6; ENSMUSG00000106911.1	114234	193424	86247.6	83038.8	80299.1	84449.5	49370.6	83038.8	1
High	Master Protein	Q6PFA2	Clathrin light chain [OS=Mus musculus]	0	14.725	14	2	16	2	218	23.6	4.5	128	16.64	2	2	Pf01086	12757	Clta	ENSMUSG00000028478.18	429845	536016	315847	600061	302153	234026	180800	600061	1
High	Master Protein	Q6PIE1	SMC3 protein [OS=Mus musculus]	0	10.571	4	3	8	3	831	96.2	6.46	55	7.49	3	3	Pf02463, Pf04111, Pf06470, Pf10168, Pf13851	13006	Smc3		192865	297000	174634	142611	135571	129671	99965.3	142611	1
High	Master Protein	Q6S390	plectin 4 [OS=Mus musculus]	0	50.058	4	17	68	16	4449	506.1	5.71	446	39.35	16	16	Pf00307, Pf00681, Pf07812, Pf11971	18810	Plec		4.21337e+06	4.67486e+06	2.85461e+06	2.56402e+06	2.96172e+06	2.04106e+06	1.63406e+06	2.56402e+06	1
High	Master Protein	Q6UKZ0	mCG8992 [OS=Mus musculus]	0	3.285	2	2	20	2	387	44.7	8.57	117	15.77	2	2	Pf00079	394252	Serpinb3d	ENSMUSG00000058017.6	1.95811e+07	453764	1.12299e+06	1.98498e+06	1.37642e+07	198115	642833	1.98498e+06	1
High	Master Protein	Q6XMP4	alanyl-tRNA synthase [OS=Mus musculus]	0.002	2.568	1	1	3	1	968	106.9	5.62	0	0	1	1	Pf01411, Pf02272, Pf07973	234734	Aars		129140	149087		85264.8	90777.1	65091.6		85264.8	1
High	Master Protein	Q6ZPH4	mKIAA1835 protein [OS=Mus musculus]	0.004	2.5	2	1	4	1	646	69.4	4.72	22	0	1	1	Pf07834, Pf13855	19387	Rangap1		1.8765e+06		1.22996e+06	1220529	1.31906e+06		704067	1220529	1
High	Master Protein	Q6ZQ32	MKIAA0858 protein [OS=Mus musculus]	0	9.514	3	3	9	3	1625	184.1	5.69	41	3.75	3	3	Pf00595, Pf13180	380928	Lmo7		314869	1.41445e+06	243944	340610	221332	617551	139641	340610	1
High	Master Protein	Q6ZQ38	cullin-associated nedd8-dissociated protein 1 [OS=Mus musculus]	0	13.023	3	3	22	3	1230	136.2	5.78	193	22.75	3	3	Pf08623, Pf12755, Pf13513	71902	Cand1	ENSMUSG00000020114.12	1.11702e+06	895607	899375	1.05883e+06	785190	391024	514829	1.05883e+06	1
High	Master Protein	Q6ZQ61	MCG121979, isoform CRA_c [OS=Mus musculus]	0	23.332	9	6	46	6	852	95.2	6.27	191	31.43	6	6	Pf00076, Pf13893, Pf14259	17184	Matr3		1.51046e+06	2.58659e+06	1.83582e+06	1.27158e+06	1.06175e+06	1.12931e+06	1.05087e+06	1.27158e+06	1
High	Master Protein	Q6ZQI3	Malectin [OS=Mus musculus]	0.001	3.777	7	2	4	2	291	32.3	6.05	0	1.7	2	2	Pf11721	109154	Mlec	ENSMUSG00000048578.11	430700	504428	237863	160649	302754	220235	136159	160649	1
High	Master Protein	Q6ZWQ7	Signal peptidase complex subunit 3 [OS=Mus musculus]	0	3.291	5	1	12	1	180	20.3	8.62	29	7.67	1	1	Pf04573	76687	Spcs3	ENSMUSG00000054408.9	476377	671203	353049	271143	334862	293049	202095	271143	1
High	Master Protein	Q6ZWU9	40S ribosomal protein S27 [OS=Mus musculus]	0	10.286	38	3	25	3	84	9.5	9.45	118	22.39	3	3	Pf01667	57294; 100043813	Rps27; Gm9846; Rps27rt	ENSMUSG00000090733.6; ENSMUSG00000050621.7	1.54029e+06	1.74228e+06	1.26893e+06	1.42874e+06	1.08272e+06	760685	726372	1.42874e+06	1
High	Master Protein	Q6ZWV7	60S ribosomal protein L35 [OS=Mus musculus]	0.001	4.645	8	1	20	1	123	14.5	11.05	46	17.58	1	1	Pf00831	66489	Rpl35	ENSMUSG00000078193.2; ENSMUSG00000062997.6	656360	1.48328e+06	676065	782052	461378	647603	386999	782052	1
High	Master Protein	Q6ZWX6	Eukaryotic translation initiation factor 2 subunit 1 [OS=Mus musculus]	0	18.136	16	5	34	5	315	36.1	5.08	449	30	5	5	Pf00575, Pf07541	13665	Eif2s1	ENSMUSG00000021116.10	1.50739e+06	2.39943e+06	1.45244e+06	1.12457e+06	1.05959e+06	1.0476e+06	831417	1.12457e+06	1
High	Master Protein	Q78IK2	Up-regulated during skeletal muscle growth protein 5 OS=Mus musculus GN=Usmg5 PE=1 SV=1	0	9.275	26	1	4	1	58	6.4	9.83	242		1		Pf14960	66477; 102642507	Usmg5; LOC100504912; LOC102642507	ENSMUSG00000071528.3	174471	408134	365477	240127	122642	178192	209209	240127	1
High	Master Protein	Q78IK4	MICOS complex subunit MIC27 [OS=Mus musculus]	0	3.65	4	1	12	1	265	29.2	9.31	48	3.55	1	1	Pf09769	68117	Apool	ENSMUSG00000025525.12	163417	316089	171857	146335	114871	138005	98376	146335	1
High	Master Protein	Q78PY7	staphylococcal nuclease domain-containing protein 1 [OS=Mus musculus]	0	19.064	7	5	30	5	910	102	7.43	293	18.05	5	5	Pf00565, Pf00567	56463	Snd1	ENSMUSG00000001424.14	794157	1.37328e+06	731795	1.18623e+06	558241	599577	418900	1.18623e+06	1	Oxidation [K603]
High	Master Protein	Q7M739	Nuclear pore complex-associated intranuclear coiled-coil protein TPR [OS=Mus musculus]	0	6.874	2	3	5	3	2357	266.8	5.01	23	0	2	3	Pf00038, Pf01496, Pf01576, Pf02463, Pf04111, Pf04156, Pf07926, Pf08317, Pf09726, Pf12128, Pf13166, Pf14915, Pf15070	108989	Tpr	ENSMUSG00000006005.17	273104	199123	203824	440951	191974	86937.6	116675	440951	1
High	Master Protein	Q7M754	Try10-like trypsinogen [OS=Mus musculus]	0	8.845	4	1	66	1	246	26.5	5.06	872	77.16	1	1	Pf00089	386551	Gm5409		1.20849e+07	1.56704e+07	1.30642e+07	7.87813e+06	8.49486e+06	6.84173e+06	7.47833e+06	7.87813e+06	1
High	Master Protein	Q7TMM9	Tubulin beta-2A chain [OS=Mus musculus]	0	96.117	34	14	267	1	445	49.9	4.89	2941	253.66	14	13	Pf00091, Pf03953, Pf10644	22151	Tubb2a	ENSMUSG00000058672.6	779088	2.04705e+06	1.03695e+06	891271	547648	893749	593582	891271	1	Oxidation [P70; K324]
High	Master Protein	Q7TMN7	Annexin [OS=Mus musculus]	0	9.056	8	2	12	2	319	35.9	5.57	154	11.2	2	2	Pf00191, Pf05796	11746	Anxa4		162362	740513	323966	147409	114130	323310	185448	147409	1
High	Master Protein	Q7TNV0	Protein DEK [OS=Mus musculus]	0	12.236	12	4	22	4	380	43.1	6.86	53	5.87	4	4	Pf02037, Pf08766	110052	Dek	ENSMUSG00000021377.14	200390	1.16006e+06	547553	238275	140861	506485	313435	238275	1
High	Master Protein	Q7TPV4	Myb-binding protein 1A [OS=Mus musculus]	0	25.157	4	4	28	4	1344	151.9	8.95	396	25.6	4	4	Pf04931	18432	Mybbp1a	ENSMUSG00000040463.16	349489	870738	517101	221110	245668	380167	296004	221110	1
High	Master Protein	Q80SW1	S-adenosylhomocysteine hydrolase-like protein 1 [OS=Mus musculus]	0.001	5.278	2	1	8	1	530	58.9	6.89	88	5.99	1	1	Pf00670, Pf01262, Pf01488, Pf02254, Pf02826, Pf05221	229709	Ahcyl1	ENSMUSG00000027893.14		216509	117833	100486		94528.3	67451.1	100486	1
High	Master Protein	Q80T06	Elongation factor 1-delta [OS=Mus musculus]	0	38.76	30	7	70	1	281	31.3	5.06	1062	76.99	7	7	Pf00736	66656	Eef1d	ENSMUSG00000055762.15	588116	912630	425242	467083	413407	398457	243421	467083	1
High	Master Protein	Q80T14	Extracellular matrix protein FRAS1 [OS=Mus musculus]	0	6.641	1	2	4	2	4010	442.1	5.82	40	1.96	2	2	Pf00093, Pf00757, Pf03160, Pf03302, Pf06873, Pf14843	231470	Fras1	ENSMUSG00000034687.8	223622	178819		242980	157191	78072.9		242980	1
High	Master Protein	Q80TM2	mKIAA1027 protein [OS=Mus musculus]	0	231	18	31	252	31	2564	272	6.27	4199	293.59	31	31	Pf00373, Pf01608, Pf02174, Pf08913, Pf09141, Pf09379	21894	Tln1		8.45599e+06	2.69185e+07	8.07071e+06	1.02222e+07	5.94401e+06	1.17527e+07	4.61991e+06	1.02222e+07	1
High	Master Protein	Q80U88	MKIAA0038 protein [OS=Mus musculus]	0	10.864	14	2	6	2	230	25.5	8.59	51	7.84	2	2	Pf00076, Pf13893, Pf14259	22384	Eif4h		524017	487574	503487	527293	368349	212876	288210	527293	1
High	Master Protein	Q80U89	MKIAA0034 protein [OS=Mus musculus]	0	88.288	12	16	114	16	1684	192.4	5.6	1410	117.54	16	16	Pf00637, Pf01394, Pf04053, Pf09268, Pf13838	67300	Cltc		4.64504e+06	9.28164e+06	4.40801e+06	5.15771e+06	3.26516e+06	4.05239e+06	2.52328e+06	5.15771e+06	1
High	Master Protein	Q80UL3	Galactokinase 1 [OS=Mus musculus]	0	7.274	6	2	9	2	392	42.3	5.26	44	1.96	2	2	Pf08544, Pf10509	14635	Galk1		156990	633319	225900	339886	110354	276509	129312	339886	1
High	Master Protein	Q80V08	RPL17 protein [OS=Mus musculus]	0	15.041	15	2	16	2	194	22.4	10.33	130	13.14	2	2	Pf00237	319195	Rpl17		391820	988048	438054	353624	275424	431385	250755	353624	1
High	Master Protein	Q80V42-1	Carboxypeptidase M [OS=Mus musculus]	0.001	4.274	2	1	8	1	443	50.5	7.78	40	5.63	1	1	Pf00246, Pf04952, Pf13620, Pf13715	70574	Cpm	ENSMUSG00000020183.11	119272	486603	112581	130647	83840.6	212452	64444.8	130647	1
High	Master Protein	Q80W68	Kin of IRRE-like protein 1 [OS=Mus musculus]	0	13.198	6	3	18	3	789	87.1	5.92	150	7.41	3	3	Pf00047, Pf07679, Pf07686, Pf08205, Pf13895, Pf13927	170643	Kirrel	ENSMUSG00000041734.15	215105	782096	262165	288676	151205	341465	150071	288676	1
High	Master Protein	Q80WU2	Rhophilin-1 [OS=Mus musculus]	0.001	3.91	2	1	4	1	451	49	5.55	47	3.69	1	1	Pf02185, Pf03097	14787	Rhpn1	ENSMUSG00000022580.12	297606	434498		208582	209198	189703		208582	1
High	Master Protein	Q80XJ7	aldo-keto reductase family 1, member A4 (aldehyde reductase) [OS=Mus musculus]	0	8.32	7	2	10	2	325	36.6	7.64	131	12.75	2	2	Pf00248	58810	Akr1a1		1.00045e+06	1.3852e+06	1.03682e+06	820001	703249	604781	593506	820001	1
High	Master Protein	Q80Y09	PDCD6IP protein [OS=Mus musculus]	0	9.044	2	2	9	2	872	96.3	6.52	182	9	1	2	Pf03097, Pf08391, Pf13949	18571	Pdcd6ip		222185	1.10372e+06	845213	548971	156181	481886	483824	548971	1
High	Master Protein	Q810I7	Apoa4 protein [OS=Mus musculus]	0	3.376	5	2	3	2	376	42.9	5.76	37	0	2	1	Pf01442, Pf07902	11808	Apoa4		322391	197908		189914	226620	86407.2		189914	1
High	Master Protein	Q8BFR5	elongation factor Tu, mitochondrial [OS=Mus musculus]	0	16.061	11	4	32	4	452	49.5	7.56	406	33.17	3	4	Pf00009, Pf03143, Pf03144	233870	Tufm	ENSMUSG00000073838.10	1.07725e+06	1.77739e+06	861419	962995	757239	776012	493101	962995	1
High	Master Protein	Q8BFU2	Histone H2A type 3 [OS=Mus musculus]	0	46.547	38	5	165	1	130	14.1	11.05	2978	250.43	5	5	Pf00125, Pf00808	319162	Hist3h2a	ENSMUSG00000078851.4	2.82437e+08	3.56148e+08	4.16793e+08	1.83868e+08	1.98535e+08	1.55495e+08	2.38584e+08	1.83868e+08	1
High	Master Protein	Q8BFW7-1	Lipoma-preferred partner homolog [OS=Mus musculus]	0.001	2.785	4	1	4	1	613	65.8	7.37	14	0	1	1	Pf00412, Pf02318	210126	Lpp	ENSMUSG00000033306.14	88329.8	199766		46001.5	62090.1	87218.3		46001.5	1	Oxidation [P233]
High	Master Protein	Q8BFZ3	Beta-actin-like protein 2 [OS=Mus musculus]	0	84.401	24	8	308	1	376	42	5.49	2872	330.54	7	8	Pf00022	238880	Actbl2	ENSMUSG00000055194.3	349417	645380	76929.4	318253	245617	281775	44036.6	318253	1
High	Master Protein	Q8BFZ9	Erlin-2 [OS=Mus musculus]	0	13.03	7	2	30	2	340	37.8	5.5	425	31.68	2	2	Pf01145	244373	Erlin2	ENSMUSG00000031483.8	742733	1.2452e+06	255163	455680	522093	543657	146063	455680	1
High	Master Protein	Q8BG13	RNA-binding protein 3 [OS=Mus musculus]	0	18.862	23	3	38	3	154	16.8	8.38	226	29.78	3	3	Pf00076, Pf13893, Pf14259	19652	Rbm3	ENSMUSG00000031167.16	3.69163e+06	4.93627e+06	3.10313e+06	3.47385e+06	2.59498e+06	2.15519e+06	1.77632e+06	3.47385e+06	1
High	Master Protein	Q8BG32	26S proteasome non-ATPase regulatory subunit 11 [OS=Mus musculus]	0	7.306	3	1	6	1	422	47.4	6.48	134	6.5	1	1	Pf01399	69077	Psmd11	ENSMUSG00000017428.16	292565	478754	229490	227252	205654	209025	131367	227252	1
High	Master Protein	Q8BGZ7	Keratin, type II cytoskeletal 75 [OS=Mus musculus]	0	126.068	21	18	440	1	551	59.7	8.31	4647	505.19	18	18	Pf00012, Pf00038, Pf01496, Pf01576, Pf04111, Pf04156, Pf09728, Pf13166	109052	Krt75	ENSMUSG00000022986.5	4.603e+06	3.36877e+06	5.05242e+06	1.14296e+07	3.23561e+06	1.47082e+06	2.89215e+06	1.14296e+07	1	Oxidation [K346]
High	Master Protein	Q8BH95	Enoyl-CoA hydratase, mitochondrial [OS=Mus musculus]	0	11.347	9	3	7	3	290	31.5	8.48	80	4.08	2	3	Pf00378	93747	Echs1	ENSMUSG00000025465.13	1.51264e+06	2.22337e+06	533077	1.15e+06	1.06328e+06	970730	305149	1.15e+06	1
Medium	Master Protein	Q8BIY0	Uncharacterized protein [OS=Mus musculus]	0.022	1.244	2	1	1	1	650	73	6.51	0		1		Pf00023, Pf00069, Pf06479, Pf07714, Pf12796, Pf13606, Pf13637, Pf13857	24014	Rnasel		2.93209e+06	7.83696e+06	4.52275e+06		2.06107e+06	3.42164e+06	2588953		1
High	Master Protein	Q8BK56	Uncharacterized protein [OS=Mus musculus]	0	180.048	52	25	404	25	605	67.4	5.83	6296	512.26	24	25	Pf00273	11576	Afp		4.85832e+07	8.96789e+07	4.5095e+07	4.09549e+07	3.41508e+07	3.91541e+07	2.58137e+07	4.09549e+07	1
High	Master Protein	Q8BK67	Protein RCC2 [OS=Mus musculus]	0.001	4.262	3	1	13	1	520	55.9	8.72	56	2.01	1	1	Pf00415, Pf13540	108911	Rcc2	ENSMUSG00000040945.13	136861	188209	106212	123466	96204	82172.5	60798.6	123466	1
High	Master Protein	Q8BKG3	Inactive tyrosine-protein kinase 7 [OS=Mus musculus]	0	13.158	3	2	17	2	1062	117.5	6.84	73	5.06	2	2	Pf00047, Pf00069, Pf07654, Pf07679, Pf07686, Pf07714, Pf13895, Pf13927, Pf14575	71461	Ptk7	ENSMUSG00000023972.9	344943	735154	438815	342173	242472	320971	251190	342173	1
High	Master Protein	Q8BMF4	Dihydrolipoyllysine-residue acetyltransferase component of pyruvate dehydrogenase complex, mitochondrial [OS=Mus musculus]	0.005	2.292	2	1	6	1	642	67.9	8.57	54	1.71	1	1	Pf00198, Pf00364, Pf02817	235339	Dlat	ENSMUSG00000000168.9	592620	1.07037e+06	366288	469383	416573	467324	209674	469383	1
High	Master Protein	Q8BMK4	Cytoskeleton-associated protein 4 [OS=Mus musculus]	0	36.206	15	8	38	8	575	63.7	5.64	413	35.56	8	7	Pf13166	216197	Ckap4	ENSMUSG00000046841.5	2.11972e+06	4.17502e+06	1.88607e+06	2.02596e+06	1490022	1.82283e+06	1.07964e+06	2.02596e+06	1
High	Master Protein	Q8BMS1	Trifunctional enzyme subunit alpha, mitochondrial [OS=Mus musculus]	0	14.466	5	4	12	4	763	82.6	9.14	94	3.27	4	4	Pf00378, Pf00725, Pf02737	97212	Hadha	ENSMUSG00000025745.11	1.54626e+06	2.53201e+06	902276	1.43982e+06	1.08692e+06	1.10548e+06	516489	1.43982e+06	1
High	Master Protein	Q8BN69	Uncharacterized protein [OS=Mus musculus]	0.005	2.185	12	1	12	1	94	10.2	10.15	99	0	1	1		235493	BC031353; Fam214a		3.2165e+06	2.77929e+06	1.85146e+06	1.04447e+06	2.26099e+06	1.21345e+06	1.05983e+06	1.04447e+06	1	Oxidation [K45]
High	Master Protein	Q8BNA5	Uncharacterized protein [OS=Mus musculus]	0	8.301	6	2	16	2	509	57.1	5.33	92	15.41	2	2	Pf00018, Pf02218, Pf07653, Pf14604	13043	Cttn		745332	1.86716e+06	672704	667483	523920	815207	385075	667483	1
High	Master Protein	Q8BPC9	Uncharacterized protein [OS=Mus musculus]	0	3.473	8	1	9	1	144	15.8	9.36	49	0	1	1	Pf03820	14057	Sfxn1		185276	477917	212846	218469	130237	208660	121839	218469	1
High	Master Protein	Q8BQ02	Uncharacterized protein [OS=Mus musculus]	0	35.753	26	5	46	4	215	24.9	5.91	663	59.49	5	5	Pf00505, Pf09011	15289	Hmgb1		1.44445e+06	3.40592e+06	2.64151e+06	1.20845e+06	1.01535e+06	1.48703e+06	1.51208e+06	1.20845e+06	1
High	Master Protein	Q8BSH9	Nucleosome assembly protein 1-like 1 [OS=Mus musculus]	0	12.907	9	2	6	2	383	44.6	4.56	111	9.81	2	2	Pf00956	53605	Nap1l1	ENSMUSG00000058799.15	290060	673412	490552	395881	203893	294014	280806	395881	1
High	Master Protein	Q8BT90	Uncharacterized protein [OS=Mus musculus]	0	7.623	7	1	8	1	141	16.1	9.94	29	4.48	1	1	Pf00833	20068	Rps17		968304	1.67081e+06	1.24837e+06	901898	680654	729479	714602	901898	1
High	Master Protein	Q8BTU5	Proteasome subunit alpha type [OS=Mus musculus]	0	11.486	16	4	20	4	262	29.4	6.18	117	11.13	4	4	Pf00227, Pf10584	26440	Psma1		1.90102e+06	2.51627e+06	1.56711e+06	1.14047e+06	1.3363e+06	1.09861e+06	897057	1.14047e+06	1
High	Master Protein	Q8BTU6	eukaryotic initiation factor 4A-II [OS=Mus musculus]	0	40.7	20	7	65	1	362	41.3	5.64	672	75.6	7	7	Pf00270, Pf00271, Pf04851	13682	Eif4a2	ENSMUSG00000022884.14		2.20895e+06	1.41044e+06	428634		964435	807379	428634	1
High	Master Protein	Q8BUM1	Uncharacterized protein [OS=Mus musculus]	0	23.775	13	3	54	3	301	33.6	6.99	500	51.74	3	3	Pf00076, Pf13893, Pf14259	230908	Tardbp		3.8851e+06	3.70196e+06	3.93516e+06	1.71585e+06	2.73097e+06	1.61629e+06	2.2526e+06	1.71585e+06	1
High	Master Protein	Q8BVI9	Uncharacterized protein [OS=Mus musculus]	0	33.22	27	9	137	4	298	32.9	9.74	959	114.09	9	9	Pf00153	11739	Slc25a4		3.99738e+06	8.33699e+06	5.0117e+06	4.00593e+06	2.8099e+06	3.63995e+06	2.86884e+06	4.00593e+06	1
High	Master Protein	Q8BX12	Uncharacterized protein [OS=Mus musculus]	0.001	3.93	2	1	2	1	422	45.9	9.5	30	0	1	1		228869	Ncoa5		105732	159794		56867.1	74322.6	69766.7		56867.1	1
High	Master Protein	Q8BXK9	Chloride intracellular channel protein 5 [OS=Mus musculus]	0	13.909	11	2	14	2	251	28.3	5.94	227	15.05	2	2	Pf13409, Pf13410, Pf13417	224796	Clic5	ENSMUSG00000023959.8	308163	658553	295250	370510	216618	287526	169010	370510	1
High	Master Protein	Q8BYH6	Uncharacterized protein [OS=Mus musculus]	0.001	5.194	2	1	4	1	690	79	5.11	26	4.72	1	1	Pf00270, Pf02889	320632	Snrnp200		175978	353699	171743	133428	123701	154426	98310.7	133428	1
High	Master Protein	Q8BZY3	DEAD (Asp-Glu-Ala-Asp) box polypeptide 19b [OS=Mus musculus]	0	11.144	5	2	8	2	494	55.6	8.54	136	4.57	2	2	Pf00270, Pf00271	234733	Ddx19b	ENSMUSG00000033658.16	250701	801368	254446	397367	176226	349880	145652	397367	1
High	Master Protein	Q8C1B7	Septin-11 [OS=Mus musculus]	0	37.38	14	7	53	6	431	49.7	6.68	684	58.58	7	6	Pf00735	52398	Sept11	ENSMUSG00000058013.11	2.01956e+06	5.93249e+06	2.32034e+06	2.04036e+06	1.41962e+06	2.59014e+06	1.32823e+06	2.04036e+06	1
High	Master Protein	Q8C290	Uncharacterized protein [OS=Mus musculus]	0	84.409	18	12	145	12	800	87.9	6.24	1738	157.25	12	12	Pf00622, Pf13671	51810	Hnrnpu		1.61268e+07	2.86767e+07	1.82179e+07	1.0339e+07	1.13361e+07	1.25203e+07	1.04285e+07	1.0339e+07	1	Oxidation [P54]
High	Master Protein	Q8C2E1	Uncharacterized protein [OS=Mus musculus]	0	8.503	7	3	8	3	589	65.3	5.11	54	3.13	3	3	Pf02985, Pf13513, Pf13646	51792	Ppp2r1a		248020	1.23917e+06	542300	385210	174342	541027	310428	385210	1
High	Master Protein	Q8C2Q3	RNA-binding protein 14 [OS=Mus musculus]	0	20.91	10	4	27	4	669	69.4	9.67	304	28.45	3	4	Pf00076, Pf13893, Pf14259	56275	Rbm14	ENSMUSG00000006456.10	697073	1.43788e+06	596081	650560	489997	627783	341214	650560	1	Oxidation [P265]
High	Master Protein	Q8C2Q7	Heterogeneous nuclear ribonucleoprotein H [OS=Mus musculus]	0	49.274	15	5	104	4	472	51.2	6.8	1350	130.78	5	5	Pf00076, Pf08080, Pf14259	59013	Hnrnph1	ENSMUSG00000007850.16	6.37552e+06	1.41932e+07	1.01423e+07	6.82087e+06	4.48157e+06	6.19677e+06	5.80575e+06	6.82087e+06	1
High	Master Protein	Q8C2T3	Uncharacterized protein [OS=Mus musculus]	0.001	4.333	6	1	4	1	171	18.6	4.13	49	4.67	1	1	Pf03247	19231	Ptma		1.86755e+06	1.28762e+06	1.43812e+06	2.32843e+06	1.31276e+06	562178	823222	2.32843e+06	1
Medium	Master Protein	Q8C343	Uncharacterized protein [OS=Mus musculus]	0.022	1.283	2	1	5	1	410	42.4	7.94	0	0	1	1		66932	Rexo1		694920	6.22968e+06	3.35752e+06	591346	488483	2.7199e+06	1.92194e+06	591346	1
High	Master Protein	Q8C470	Uncharacterized protein [OS=Mus musculus]	0.001	5.524	6	1	6	1	217	25	6.15	59	0	1	1	Pf01652	13684	Eif4e		206070	426907	190099	144515	144853	186389	108818	144515	1
High	Master Protein	Q8C5B4	alpha-amylase [OS=Mus musculus]	0	12.656	2	1	12	1	508	57.3	7.28	150	13.55	1	1	Pf00128, Pf02806	109959	Amy2a5		134434	409606	428479	1.81961e+06	94498	178835	245274	1.81961e+06	1
High	Master Protein	Q8C5H3	Uncharacterized protein [OS=Mus musculus]	0	7.037	3	1	3	1	425	47.8	5.05	55	3.2	1	1	Pf00400, Pf12265	245688	Rbbp7		599702	754133	736894	501022	421551	329256	421819	501022	1
High	Master Protein	Q8C671	Uncharacterized protein [OS=Mus musculus]	0	25.018	13	3	49	3	254	29	11.22	934	56.62	3	3	Pf00076, Pf13893, Pf14259	20382	Srsf2		5.4048e+06	8.83537e+06	5.43018e+06	3.7299e+06	3.79922e+06	3.85755e+06	3.10839e+06	3.7299e+06	1
High	Master Protein	Q8C6Z2	Uncharacterized protein [OS=Mus musculus]	0	13.679	4	3	10	3	1294	141.1	5.3	187	5.08	3	3	Pf00058, Pf00086, Pf06119, Pf06247, Pf07474, Pf07645, Pf12662, Pf12947, Pf14670	18074	Nid2		507419	1.29485e+06	372423	94170.6	356682	565333	213186	94170.6	1
High	Master Protein	Q8CAW4	Uncharacterized protein [OS=Mus musculus]	0	25.058	8	4	26	4	732	81.9	6.96	392	25.23	4	4	Pf00047, Pf07679, Pf13895, Pf13927	18613	Pecam1		548945	1.29055e+06	476585	746865	385872	563457	272811	746865	1
High	Master Protein	Q8CBM0	Uncharacterized protein [OS=Mus musculus]	0	6.772	5	2	10	2	564	60.5	6.4	75	3.58	2	2	Pf00412	22793	Zyx		213640	450719	159438	192444	150175	196785	91266.7	192444	1
High	Master Protein	Q8CC35	synaptopodin [OS=Mus musculus]	0	13.464	6	5	33	5	929	99.5	9.42	185	9.91	5	5		104027	Synpo	ENSMUSG00000043079.17	2.05834e+06	3.93352e+06	1.14671e+06	2.29707e+06	1.44688e+06	1.71739e+06	656412	2.29707e+06	1
High	Master Protein	Q8CCV1	Uncharacterized protein [OS=Mus musculus]	0	3.1	2	1	4	1	498	55.6	5.55	0	1.7	1	1	Pf00009, Pf03143, Pf03144	14852	Gspt1		259334	374895	250853	256104	182295	163680	143595	256104	1
High	Master Protein	Q8CD23	Uncharacterized protein [OS=Mus musculus]	0	66.669	18	12	98	1	707	76.8	4.79	1804	137.02	12	12	Pf00076, Pf13893, Pf14259	17975	Ncl		7.99389e+06	1.47728e+07	1.14825e+07	8.20055e+06	5.61918e+06	6.44986e+06	6.57289e+06	8.20055e+06	1
High	Master Protein	Q8CE30	Uncharacterized protein [OS=Mus musculus]	0	62.931	18	12	94	1	707	76.7	4.77	1704	126.68	12	12	Pf00076, Pf13893, Pf14259	17975	Ncl		251601		179779	110725	176859		102910	110725	1
High	Master Protein	Q8CG76	aflatoxin B1 aldehyde reductase member 2 [OS=Mus musculus]	0	6.494	6	2	19	2	367	40.6	8.12	110	7.61	2	2	Pf00248	110198	Akr7a5	ENSMUSG00000028743.7	437908	698345	1.42831e+06	936911	307821	304899	817608	936911	1
High	Master Protein	Q8CGF4	Sec24 related gene family, member C (S. cerevisiae) [OS=Mus musculus]	0.002	2.738	1	1	6	1	1096	118.5	6.84	30	1.69	1	1	Pf00626, Pf04810, Pf04811, Pf04815, Pf08033, Pf09770	218811	Sec24c		95215.7	218597	87324.9	66710.2	66930.4	95439.9	49987.3	66710.2	1
High	Master Protein	Q8CHT0	Delta-1-pyrroline-5-carboxylate dehydrogenase, mitochondrial [OS=Mus musculus]	0	2.973	2	1	4	1	562	61.8	8.24	39	0	1	1	Pf00171, Pf06810	212647	Aldh4a1	ENSMUSG00000028737.15	260247	156627		167370	182937	68383.9		167370	1
High	Master Protein	Q8CIB5	Fermitin family homolog 2 [OS=Mus musculus]	0	13.524	5	3	29	3	680	77.8	6.7	237	19.2	3	3	Pf00169, Pf00373	218952	Fermt2	ENSMUSG00000037712.15	1.12727e+06	2.14837e+06	787923	1.10722e+06	792400	937984	451030	1.10722e+06	1
High	Master Protein	Q8CIE6	coatomer subunit alpha [OS=Mus musculus]	0.001	5.122	3	3	11	3	1224	138.3	7.65	22	9.55	2	3	Pf00400, Pf04053, Pf06957	12847	Copa	ENSMUSG00000026553.17		953897	308258	188451		416474	176456	188451	1
High	Master Protein	Q8JZQ9	Eukaryotic translation initiation factor 3 subunit B [OS=Mus musculus]	0.001	4.061	1	1	7	1	803	91.3	5.02	84	3.7	1	1	Pf00076, Pf08662, Pf13893, Pf14259	27979	Eif3b	ENSMUSG00000056076.13	195654	312389	238843	173513	137532	136390	136721	173513	1
High	Master Protein	Q8K019-1	Bcl-2-associated transcription factor 1 [OS=Mus musculus]	0.007	2.007	1	1	3	1	919	105.9	9.99	22	0	1	1	Pf15440	72567	Bclaf1	ENSMUSG00000037608.16	78596	201302	139283	56408.4	55247.8	87889.2	79729.5	56408.4	1
High	Master Protein	Q8K054	Sipa1l3 protein [OS=Mus musculus]	0	3.1	6	1	16	1	256	28	6.44	29	3.94	1	1	Pf11881	74206	Sipa1l3		5.14906e+06	2.02937e+06	6.65337e+06	4.14697e+06	3.61945e+06	886028	3.80858e+06	4.14697e+06	1
High	Master Protein	Q8K0E8	Fibrinogen beta chain [OS=Mus musculus]	0	49.054	19	7	76	7	481	54.7	7.08	1105	73.82	7	7	Pf00147, Pf01920, Pf08702	110135	Fgb	ENSMUSG00000033831.5	5.73181e+06	1.04812e+07	2.62091e+06	3.27815e+06	4.02909e+06	4.57613e+06	1.50029e+06	3.27815e+06	1
High	Master Protein	Q8K0L1	Aldh6a1 protein [OS=Mus musculus]	0	6.707	7	3	8	3	457	49.6	7.36	23	7.36	3	3	Pf00171	104776	Aldh6a1		569670	712706	191756	385227	400441	311169	109767	385227	1
Medium	Master Protein	Q8K0M3	SORBS3 protein [OS=Mus musculus]	0.022	1.335	3	1	1	1	680	76.7	9.29		0		1	Pf00018, Pf02208, Pf07653, Pf14604	20410	Sorbs3		69067.5	144538		63849.9	48549.9	63105.8		63849.9	1
High	Master Protein	Q8K0Y2	Keratin, type I cuticular Ha3-I [OS=Mus musculus]	0	27.678	18	7	73	2	404	46.1	4.83	807	72.77	7	7	Pf00038, Pf01576, Pf04156, Pf05667, Pf07888, Pf12128, Pf13514	71888	Krt33a	ENSMUSG00000035592.2	215717		8.49506e+06	525449	151635		4.86282e+06	525449	1
High	Master Protein	Q8K144	Polypyrimidine tract binding protein 1 [OS=Mus musculus]	0	29.208	10	5	67	4	555	59.3	9.16	718	90.6	4	5	Pf00076, Pf13893, Pf14259	19205	Ptbp1		5.14784e+06	1.11942e+07	6.0894e+06	5.14844e+06	3.61859e+06	4.88744e+06	3.48575e+06	5.14844e+06	1
High	Master Protein	Q8K1K6	serpin B10 [OS=Mus musculus]	0.001	4.347	3	1	8	1	397	45.1	6.47	29	1.93	1	1	Pf00079	241197	Serpinb10		3.46605e+06	119805	415707	494044	2.43641e+06	52307	237962	494044	1
High	Master Protein	Q8K2B3	Succinate dehydrogenase [ubiquinone] flavoprotein subunit, mitochondrial [OS=Mus musculus]	0	22.052	8	4	43	4	664	72.5	7.37	360	34.06	4	4	Pf00890, Pf02910	66945	Sdha	ENSMUSG00000021577.13	914958	2.0908e+06	964246	898173	643156	912851	551962	898173	1
High	Master Protein	Q8K3G7	Reticulon [OS=Mus musculus]	0	10.091	6	2	12	2	357	38.5	4.78	71	12.52	2	2	Pf02453	68585	Rtn4		1.63932e+06	1.42045e+06	632932	1.03221e+06	1.15234e+06	620171	362309	1.03221e+06	1
High	Master Protein	Q8K4K8	Antioxidant protein [OS=Mus musculus]	0	3.095	4	1	9	1	254	27.7	6.84	41	5.86	1	1	Pf00578, Pf08534, Pf10417, Pf13905	11757	Prdx3		456079	648382	365178	372814	320593	283085	209039	372814	1
High	Master Protein	Q8K4Z5	splicing factor 3A subunit 1 [OS=Mus musculus]	0	10.298	5	3	11	3	791	88.5	5.22	49	8.74	3	3	Pf00240, Pf01805, Pf12230, Pf14560	67465	Sf3a1	ENSMUSG00000002129.11	630418	1.74126e+06	329426	579440	443143	760239	188573	579440	1
High	Master Protein	Q8QZY1	eukaryotic translation initiation factor 3 subunit L [OS=Mus musculus]	0	17.353	8	3	21	3	564	66.6	6.44	358	16.37	3	3	Pf10255	223691	Eif3l	ENSMUSG00000033047.4	370806	548500	563253	511712	260652	239477	322422	511712	1
High	Master Protein	Q8R081	Heterogeneous nuclear ribonucleoprotein L [OS=Mus musculus]	0	44.603	22	9	60	9	586	63.9	8.1	571	48.08	9	9	Pf00076, Pf13893, Pf14259	15388	Hnrnpl	ENSMUSG00000015165.16	3.25817e+06	6.93932e+06	4.13681e+06	2.15534e+06	2.29028e+06	3.02973e+06	2.36803e+06	2.15534e+06	1	Oxidation [P416]
High	Master Protein	Q8R180	ERO1-like protein alpha [OS=Mus musculus]	0	7.91	6	2	4	2	464	54.1	6.54	39	4.24	2	2	Pf04137	50527	Ero1l	ENSMUSG00000021831.8	1.46627e+06	360335	1.08964e+06	2.32007e+06	1.03069e+06	157323	623741	2.32007e+06	1
High	Master Protein	Q8R1B4	Eukaryotic translation initiation factor 3 subunit C [OS=Mus musculus]	0	12.28	4	3	28	3	911	105.5	5.78	199	17.35	3	3	Pf01399, Pf05470	56347	Eif3c	ENSMUSG00000030738.11	494561	634113	300825	473453	347644	276856	172201	473453	1
High	Master Protein	Q8R2Y2-1	Cell surface glycoprotein MUC18 [OS=Mus musculus]	0	11.858	4	3	32	3	648	71.5	5.83	232	9.45	3	3	Pf00047, Pf07679, Pf07686, Pf08205, Pf13895, Pf13927	84004	Mcam	ENSMUSG00000032135.15	1.24803e+06	3.23869e+06	956868	1.11043e+06	877281	1.41402e+06	547739	1.11043e+06	1
High	Master Protein	Q8R5J9	PRA1 family protein 3 [OS=Mus musculus]	0.009	1.741	4	1	1	1	188	21.5	9.61		0		1	Pf03208	65106	Arl6ip5	ENSMUSG00000035199.6	473236	823755		322952	332654	359654		322952	1
High	Master Protein	Q8VC30	Triokinase/FMN cyclase [OS=Mus musculus]	0	12.898	6	3	14	3	578	59.7	6.92	217	19	3	3	Pf02733, Pf02734	225913	Dak; Tkfc	ENSMUSG00000034371.8	1.39258e+06	2.81209e+06	1.38222e+06	1.17789e+06	978893	1.22777e+06	791222	1.17789e+06	1
High	Master Protein	Q8VC94	Rpl11 protein [OS=Mus musculus]	0	15.735	20	3	34	3	167	19	9.8	646	50.21	3	3	Pf00281, Pf00673	67025	Rpl11		2.63388e+06	4.6707e+06	3.40144e+06	2.55309e+06	1.85144e+06	2.03924e+06	1.94709e+06	2.55309e+06	1
High	Master Protein	Q8VCM7	Fibrinogen gamma chain [OS=Mus musculus]	0	19.496	18	5	29	5	436	49.4	5.86	280	34.74	5	5	Pf00147, Pf08702	99571	Fgg	ENSMUSG00000033860.13	4.81035e+06	8.94897e+06	1.82589e+06	2.24654e+06	3.38136e+06	3.90714e+06	1.04519e+06	2.24654e+06	1	Oxidation [P101; K110]
High	Master Protein	Q8VCQ8	caldesmon 1 [OS=Mus musculus]	0	35.829	22	9	63	9	530	60.4	7.37	396	28.49	9	9	Pf02029	109624	Cald1	ENSMUSG00000029761.16	2.83966e+06	6.80463e+06	2.47925e+06	2.07419e+06	1.9961e+06	2.97092e+06	1.41919e+06	2.07419e+06	1	Oxidation [K430; P434]
High	Master Protein	Q8VDD5	Myosin-9 [OS=Mus musculus]	0	305.281	27	44	414	38	1960	226.2	5.66	4790	441.42	44	43	Pf00063, Pf01442, Pf01496, Pf01576, Pf01765, Pf02463, Pf02736, Pf03962, Pf04111, Pf04156, Pf05667, Pf05911, Pf06160, Pf06637, Pf07111, Pf07888, Pf08317, Pf09726, Pf09731, Pf10498, Pf11559, Pf11917, Pf12128, Pf13094, Pf13166	17886	Myh9	ENSMUSG00000022443.16	2.57623e+07	6.01167e+07	2.33216e+07	2.88864e+07	1.81092e+07	2.62471e+07	1.335e+07	2.88864e+07	1
High	Master Protein	Q8VDJ3	Vigilin [OS=Mus musculus]	0	13.753	4	3	10	3	1268	141.7	6.87	56	5.86	3	3	Pf00013, Pf13014, Pf14611	110611	Hdlbp	ENSMUSG00000034088.15	232990	262642	150807	240462	163777	114670	86326.6	240462	1
High	Master Protein	Q8VDM6	Heterogeneous nuclear ribonucleoprotein U-like protein 1 [OS=Mus musculus]	0	3.531	3	2	4	2	859	95.9	6.58	23	1.63	2	2	Pf00622, Pf02037, Pf13671	232989	Hnrnpul1	ENSMUSG00000040725.13	287534	2.23065e+06	152377	3.97238e+07	202117	973907	87224.9	3.97238e+07	1
High	Master Protein	Q8VDN2	Sodium/potassium-transporting ATPase subunit alpha-1 [OS=Mus musculus]	0	58.869	14	10	89	10	1023	112.9	5.45	1149	77.03	10	10	Pf00122, Pf00689, Pf00690, Pf00702, Pf08282, Pf12710, Pf13246	11928	Atp1a1	ENSMUSG00000033161.10	2.97756e+06	7.18404e+06	4.37169e+06	3.00309e+06	2.09303e+06	3.13657e+06	2.50248e+06	3.00309e+06	1
High	Master Protein	Q8VE37	Regulator of chromosome condensation [OS=Mus musculus]	0	8.969	7	2	8	2	421	44.9	8.1	57	6.96	2	2	Pf00415, Pf13540	100088	Rcc1	ENSMUSG00000028896.13	203820	528891	138580	121648	143272	230915	79327	121648	1
High	Master Protein	Q8VED5	Keratin, type II cytoskeletal 79 [OS=Mus musculus]	0	70.801	11	10	275	1	531	57.5	7.69	2454	303.51	10	10	Pf00038, Pf01576, Pf13166	223917	Krt79	ENSMUSG00000061397.7	8.78022e+06		6.88321e+07	47369028	6.17192e+06		39401500	47369028	1	Oxidation [K336]
High	Master Protein	Q8VH34	LAMP-1 [OS=Mus musculus]	0	11.36	8	3	27	3	406	43.9	8.4	308	18.93	2	3	Pf01299	16783	Lamp1		1.81781e+06	1.65522e+06	863858	1.01775e+06	1.2778e+06	722676	494497	1.01775e+06	1
High	Master Protein	Q8VH52	translation initiation factor-3 subunit 5 [OS=Mus musculus]	0	12.197	17	2	14	2	148	16.1	5.15	273	15.11	2	2	Pf13012	66085	Eif3f		201647	229640	92757.4	129655	141744	100261	53097	129655	1
High	Master Protein	Q8VHX6-1	Filamin-C [OS=Mus musculus]	0	7.816	1	3	13	1	2726	290.9	5.95	118	5.76	3	3	Pf00307, Pf00630	68794	Flnc	ENSMUSG00000068699.12	412837	379453	124051	354616	290197	165670	71010.2	354616	1
High	Master Protein	Q8VHY0	Chondroitin sulfate proteoglycan 4 [OS=Mus musculus]	0	11.898	2	3	12	3	2327	252.2	5.44	147	5.89	3	3	Pf00054, Pf02210, Pf13385	121021	Cspg4	ENSMUSG00000032911.6	312282	659227	300245	247086	219514	287820	171869	247086	1
High	Master Protein	Q8VIJ6	splicing factor, proline- and glutamine-rich [OS=Mus musculus]	0	57.16	17	11	117	10	699	75.4	9.44	1281	122.94	11	11	Pf00076, Pf08075, Pf13893, Pf14259	71514	Sfpq	ENSMUSG00000028820.13	9.74041e+06	1.28383e+07	1.1367e+07	5.3365e+06	6.84687e+06	5.60524e+06	6.50678e+06	5.3365e+06	1
High	Master Protein	Q8VIQ4	Podocalyxin [OS=Mus musculus]	0	24.041	15	5	50	5	465	49.1	6.6	402	51.74	5	5	Pf06365	27205	Podxl		5.39572e+06	1.53152e+07	6.44664e+06	5.80956e+06	3.79284e+06	6.68664e+06	3.69024e+06	5.80956e+06	1
High	Master Protein	Q91VC3	Eukaryotic initiation factor 4A-III [OS=Mus musculus]	0	39.533	17	6	57	4	411	46.8	6.73	493	76.96	6	6	Pf00270, Pf00271	192170	Eif4a3	ENSMUSG00000025580.15	2.42243e+06	1.58352e+06	2.22522e+06	2.02338e+06	1.70281e+06	691371	1.27378e+06	2.02338e+06	1
High	Master Protein	Q91VR5	ATP-dependent RNA helicase DDX1 [OS=Mus musculus]	0.001	5.19	3	2	4	2	740	82.4	7.21	25	3.77	2	2	Pf00270, Pf00271, Pf00622	104721	Ddx1	ENSMUSG00000037149.9	433319	1.24372e+06	546857	446989	304595	543013	313037	446989	1
Medium	Master Protein	Q91WQ3	Tyrosine--tRNA ligase, cytoplasmic [OS=Mus musculus]	0.015	1.588	2	1	2	1	528	59.1	7.01	0	0	1	1	Pf00579, Pf01588	107271	Yars			374911	181460	201838		163687	103873	201838	1
High	Master Protein	Q91X05	Podocin [OS=Mus musculus]	0	13.873	8	2	18	2	385	42.3	8.98	363	29.73	2	2	Pf01145	170484	Nphs2	ENSMUSG00000026602.9	954168	1.73357e+06	902363	1.33693e+06	670717	756881	516539	1.33693e+06	1
High	Master Protein	Q91Y97	fructose-bisphosphate aldolase B [OS=Mus musculus]	0	76.23	31	12	160	11	364	39.5	8.27	2467	200.4	12	12	Pf00274	230163	Aldob	ENSMUSG00000028307.9	1.95859e+07	3.31084e+07	1.33663e+07	1.58844e+07	1.37676e+07	1.44552e+07	7.65128e+06	1.58844e+07	1
High	Master Protein	Q91YC8	damaged-DNA recognition protein 1 [OS=Mus musculus]	0	7.646	1	1	10	1	994	110.4	5.39	159	10.64	1	1	Pf03178, Pf10433	13194	Ddb1		137786	332574	223968	148597	96854.3	145203	128206	148597	1
High	Master Protein	Q91YQ5	Dolichyl-diphosphooligosaccharide--protein glycosyltransferase subunit 1 [OS=Mus musculus]	0	16.854	8	4	21	4	608	68.5	6.46	195	11.86	4	4	Pf04597	103963	Rpn1	ENSMUSG00000030062.7	736764	1.71819e+06	581974	712336	517897	750165	333139	712336	1
High	Master Protein	Q91YR1	Twinfilin-1 [OS=Mus musculus]	0	8.322	6	2	12	2	350	40.1	6.67	115	11.93	2	2	Pf00241	19230	Twf1	ENSMUSG00000022451.12	1.66847e+06	1.70875e+06	993204	1.0286e+06	1.17282e+06	746045	568539	1.0286e+06	1
High	Master Protein	Q920S1	Granzyme N [OS=Mus musculus]	0	3.492	8	1	19	1	248	26.9	8.22	18	0	1	1	Pf00089	245839	Gzmn	ENSMUSG00000015443.8	1.15505e+06	3.56506e+06	2.70697e+06	1.1524e+06	811922	1.55651e+06	1.54955e+06	1.1524e+06	1	Oxidation [P103]
High	Master Protein	Q921F4-1	Heterogeneous nuclear ribonucleoprotein L-like [OS=Mus musculus]	0.001	3.839	3	1	5	1	591	64.1	5.85	21	0	1	1	Pf00076, Pf13893, Pf14259	72692	Hnrnpll; Hnrpll	ENSMUSG00000024095.15	169544	194499	237810	177394	119178	84918.9	136129	177394	1
High	Master Protein	Q921I1	Serotransferrin [OS=Mus musculus]	0	133.615	38	22	225	22	697	76.7	7.18	2599	240.19	22	21	Pf00405, Pf12974	22041	Trf	ENSMUSG00000032554.15	1.90658e+07	2.77955e+07	1.18343e+07	2.23623e+07	1.3402e+07	1.21356e+07	6.77432e+06	2.23623e+07	1
High	Master Protein	Q921M3-1	Splicing factor 3B subunit 3 [OS=Mus musculus]	0	10.914	2	2	8	2	1217	135.5	5.26	145	10.71	2	2	Pf03178, Pf10433	101943	Sf3b3	ENSMUSG00000033732.10	271440	498534	368372	297324	190805	217662	210867	297324	1
High	Master Protein	Q921R2	40S ribosomal protein S13 [OS=Mus musculus]	0	27.495	31	5	74	5	140	16.1	10.71	606	70.99	5	5	Pf00312, Pf08069	68052	Rps13	ENSMUSG00000090862.3	5.4338e+06	6.68299e+06	5.26668e+06	3.69483e+06	3.81961e+06	2.91781e+06	3.0148e+06	3.69483e+06	1
High	Master Protein	Q922A2	Annexin [OS=Mus musculus]	0.001	5.723	2	1	6	1	463	49.9	6.18	45	3.47	1	1	Pf00191	11750	Anxa7		354656	116585		269621	249300	50901.1		269621	1
High	Master Protein	Q922B2	Aspartate--tRNA ligase, cytoplasmic [OS=Mus musculus]	0	12.617	9	4	20	4	501	57.1	6.49	232	13.82	3	4	Pf00152, Pf01336	226414	Dars	ENSMUSG00000026356.15	511826	1.53585e+06	870818	817600	359780	670558	498481	817600	1
High	Master Protein	Q922R8	Protein disulfide-isomerase A6 [OS=Mus musculus]	0	20.229	10	3	13	3	440	48.1	5.14	266	19.85	3	3	Pf00085, Pf13098, Pf13848, Pf13899, Pf13905	71853	Pdia6		1.94549e+06	4.14251e+06	1.86993e+06	2.45258e+06	1.36755e+06	1.80863e+06	1.0704e+06	2.45258e+06	1
High	Master Protein	Q922U2	keratin, type II cytoskeletal 5 [OS=Mus musculus]	0	218.9	32	30	773	14	580	61.7	7.75	8888	948.14	30	30	Pf00038, Pf01576, Pf03961, Pf04111, Pf05957	110308	Krt5	ENSMUSG00000061527.6	2.24023e+08	1.1337e+08	2.09372e+08	2.88418e+08	1.57473e+08	4.94976e+07	1.1985e+08	2.88418e+08	1	Oxidation [K298]
High	Master Protein	Q93092	Transaldolase [OS=Mus musculus]	0	37.93	26	8	86	8	337	37.4	7.03	991	77.5	8	8	Pf00923	21351	Taldo1	ENSMUSG00000025503.5	5.96622e+06	1.21128e+07	4.12049e+06	5051362	4.19386e+06	5.28848e+06	2.35869e+06	5051362	1
High	Master Protein	Q99J36	THUMP domain-containing protein 1 [OS=Mus musculus]	0	3.301	7	2	4	2	350	38.9	6.07	20	0	2	2	Pf02926	233802	Thumpd1	ENSMUSG00000030942.8	126745	224783	145929	100599	89093.5	98140.9	83534.2	100599	1
High	Master Protein	Q99JX6	Annexin [OS=Mus musculus]	0	73.103	28	18	179	18	667	75.2	5.5	939	126.39	18	18	Pf00191	11749	Anxa6		9.60703e+06	3.23771e+07	1.15101e+07	1.05833e+07	6.75311e+06	1.41359e+07	6.5887e+06	1.05833e+07	1
High	Master Protein	Q99JY0	Trifunctional enzyme subunit beta, mitochondrial [OS=Mus musculus]	0.001	4.208	2	1	4	1	475	51.4	9.38	66	4.46	1	1	Pf00108, Pf00109, Pf02803	231086	Hadhb	ENSMUSG00000059447.13	346133	539327	190719	308957	243309	235472	109173	308957	1
High	Master Protein	Q99KF1	Transmembrane emp24 domain-containing protein 9 [OS=Mus musculus]	0	13.853	11	3	14	3	235	27.1	8.41	103	24.11	3	3	Pf01105	67511	Tmed9	ENSMUSG00000058569.7	2.65969e+06	3.04757e+06	1.81162e+06	1.41508e+06	1.86959e+06	1.33058e+06	1.03702e+06	1.41508e+06	1
High	Master Protein	Q99KI0	Aconitate hydratase, mitochondrial [OS=Mus musculus]	0	36.22	11	7	102	7	780	85.4	7.93	1145	92.81	7	7	Pf00330, Pf00694	11429	Aco2	ENSMUSG00000022477.12	3.08367e+06	4.46747e+06	2.21457e+06	2.53361e+06	2.16762e+06	1.95051e+06	1.26768e+06	2.53361e+06	1
High	Master Protein	Q99L45	Eukaryotic translation initiation factor 2 subunit 2 [OS=Mus musculus]	0	9.471	8	3	8	3	331	38.1	5.8	87	3.92	3	3	Pf01873	67204	Eif2s2	ENSMUSG00000074656.12	596904	191082	101911	237859	419584	83427	58337	237859	1
High	Master Protein	Q99LC5	Electron transfer flavoprotein subunit alpha, mitochondrial [OS=Mus musculus]	0	26.396	23	6	40	6	333	35	8.38	421	30.46	6	6	Pf00766, Pf01012	110842	Etfa	ENSMUSG00000032314.14	2.26037e+06	2.63294e+06	852005	1.75883e+06	1.5889e+06	1.14955e+06	487712	1.75883e+06	1	Oxidation [P258]
High	Master Protein	Q99LD4	COP9 signalosome complex subunit 1 [OS=Mus musculus]	0.001	3.85	2	1	2	1	471	53.4	6.84	24	1.71	1	1	Pf01399, Pf10602	209318	Gps1		73792.9	119585	60182.5	77006.8	51871.6	52211	34450.2	77006.8	1
High	Master Protein	Q99LD8	N(G),N(G)-dimethylarginine dimethylaminohydrolase 2 [OS=Mus musculus]	0.002	2.663	5	1	2	1	285	29.6	6.01	23	1.63	1	1	Pf02274	51793	Ddah2	ENSMUSG00000007039.12	181853	309414	166515	126279	127831	135091	95318.2	126279	1
High	Master Protein	Q99LF4	tRNA-splicing ligase RtcB homolog [OS=Mus musculus]	0.001	3.708	2	1	12	1	505	55.2	7.23	102	5.7	1	1	Pf01139	28088	D10Wsu52e; Rtcb	ENSMUSG00000001783.3	191272	297686	202087	149592	134452	129970	115681	149592	1
High	Master Protein	Q99M50	Phospholipid scramblase [OS=Mus musculus]	0	5.984	5	2	12	2	327	35.8	5.06	76	5.42	2	2	Pf03803	22038	Plscr1		719760	1.79835e+06	284044	745077	505944	785166	162595	745077	1
High	Master Protein	Q99PM0	Microfibril-associated glycoprotein 1 [OS=Mus musculus]	0	3.587	5	1	1	1	185	20.8	4.89		0		1	Pf05507	17150	Mfap2	ENSMUSG00000060572.17	246694	307383		142289	173410	134204		142289	1
High	Master Protein	Q99PT1	rho GDP-dissociation inhibitor 1 [OS=Mus musculus]	0	8.743	8	1	10	1	204	23.4	5.2	51	11.79	1	1	Pf02115	192662	Arhgdia	ENSMUSG00000025132.13	248614	311613	307270	230667	174759	136051	175890	230667	1
High	Master Protein	Q99PV0	Pre-mRNA-processing-splicing factor 8 [OS=Mus musculus]	0	7.192	1	2	8	2	2335	273.4	8.84	71	6.83	2	2	Pf01398, Pf08082, Pf08083, Pf08084, Pf10596, Pf10597, Pf10598, Pf12134	192159	Prpf8	ENSMUSG00000020850.14	68584.7	255264	84741.5	156685	48210.6	111449	48508.5	156685	1
High	Master Protein	Q9CPN8	Insulin-like growth factor 2 mRNA-binding protein 3 [OS=Mus musculus]	0.003	2.511	2	1	4	1	579	63.5	8.87	17	0	1	1	Pf00013, Pf00076, Pf13014, Pf13893, Pf14259, Pf14611	140488	Igf2bp3	ENSMUSG00000029814.10	87488.8	189101		103026	61498.9	82561.9		103026	1
High	Master Protein	Q9CPQ1	Cytochrome c oxidase subunit 6C [OS=Mus musculus]	0	8.571	29	3	18	3	76	8.5	10.14	155	11.22	3	3	Pf02937	12864	Cox6c	ENSMUSG00000014313.14	1.29517e+06	5.37196e+06	2.53825e+06	1.4173e+06	910421	2.34541e+06	1.45297e+06	1.4173e+06	1
High	Master Protein	Q9CPY7-1	cytosol aminopeptidase [OS=Mus musculus]	0	8.134	5	2	8	2	519	56.1	7.72	65	3.71	2	2	Pf00883, Pf02789	66988	Lap3	ENSMUSG00000039682.12	194596	694474	478293	85672.6	136788	303209	273789	85672.6	1
High	Master Protein	Q9CQ49	Nuclear cap-binding protein subunit 2 [OS=Mus musculus]	0.001	4.261	7	1	4	1	156	18	7.81	57	4.11	1	1	Pf00076, Pf13893, Pf14259	68092	Ncbp2	ENSMUSG00000022774.12	215046		230767	170998	151163		132098	170998	1
High	Master Protein	Q9CQA3	Succinate dehydrogenase [ubiquinone] iron-sulfur subunit, mitochondrial [OS=Mus musculus]	0.001	4.621	4	1	2	1	282	31.8	8.68	41	2.26	1	1	Pf13085, Pf13183, Pf13534	67680	Sdhb	ENSMUSG00000009863.14	758110	1.26136e+06	852222	534045	532902	550711	487836	534045	1
High	Master Protein	Q9CQB4	Cytochrome b-c1 complex subunit 7 [OS=Mus musculus]	0	3.058	10	1	4	1	111	13.6	9.11	19	0	1	1	Pf02271	67530	Uqcrb	ENSMUSG00000021520.4	109721	364152	154247	115092	77126.5	158990	88295.4	115092	1
High	Master Protein	Q9CQD1	Ras-related protein Rab-5A [OS=Mus musculus]	0	16.838	17	3	22	2	215	23.6	8.15	243	24.89	2	3	Pf00009, Pf00025, Pf00071, Pf04670, Pf08477	271457	Rab5a	ENSMUSG00000017831.7	887532	1.26986e+06	205191	134202	623877	554425	117457	134202	1
High	Master Protein	Q9CQI6	coactosin-like protein [OS=Mus musculus]	0	24.275	43	6	61	6	142	15.9	5.4	394	24.67	6	6	Pf00241, Pf01453	72042	Cotl1	ENSMUSG00000031827.13	6.44545e+06	7.68633e+06	3.48282e+06	5.53423e+06	4.53073e+06	3.35587e+06	1.99367e+06	5.53423e+06	1
High	Master Protein	Q9CQR2	40S ribosomal protein S21 [OS=Mus musculus]	0	8.374	29	2	14	2	83	9.1	8.51	198	11.25	2	2	Pf01249	66481	Rps21	ENSMUSG00000039001.12	606674	455871	277601	326589	426452	199034	158907	326589	1
High	Master Protein	Q9CQS8	protein transport protein Sec61 subunit beta [OS=Mus musculus]	0	6.946	16	1	4	1	96	10	11.56	140		1		Pf03911	66212	Sec61b	ENSMUSG00000053317.11	789903	1.45142e+06	486332		555250	633694	278391		1
High	Master Protein	Q9CQV8-1	14-3-3 protein beta/alpha [OS=Mus musculus]	0	72.21	44	11	157	5	246	28.1	4.83	1996	175.3	11	11	Pf00244	54401	Ywhab	ENSMUSG00000018326.9	7.36355e+06	1.49365e+07	3.45816e+06	6.73102e+06	5.17609e+06	6.52132e+06	1.97955e+06	6.73102e+06	1	Oxidation [K29; P164]
High	Master Protein	Q9CR51	V-type proton ATPase subunit G 1 [OS=Mus musculus]	0.001	4.767	9	1	6	1	118	13.7	7.97	56	2.35	1	1	Pf03179	66290	Atp6v1g1	ENSMUSG00000039105.6	117474	302289	88705.9	83989.4	82576.3	131980	50777.8	83989.4	1
High	Master Protein	Q9CR57	60S ribosomal protein L14 [OS=Mus musculus]	0	27.666	24	5	81	1	217	23.5	11.02	804	65.83	5	5	Pf01929	67115	Rpl14	ENSMUSG00000025794.9	2.30572e+06	3.86958e+06	2.55883e+06	1.71833e+06	1.62077e+06	1.68947e+06	1.46475e+06	1.71833e+06	1
High	Master Protein	Q9CRD2	ER membrane protein complex subunit 2 [OS=Mus musculus]	0.001	3.673	8	2	7	2	297	34.9	6.81	31	1.63	2	2	Pf13414, Pf13432, Pf14559	66736	Emc2	ENSMUSG00000022337.6	811443	2.01401e+06	766555	585210	570392	879321	438798	585210	1
High	Master Protein	Q9CRE9	Uncharacterized protein [OS=Mus musculus]	0	8.7	12	4	26	4	370	40.1	8.07	70	1.78	4	4	Pf00009, Pf03144, Pf09173	26905	Eif2s3x		1.19783e+06	1.64094e+06	1.36577e+06	1.12999e+06	842000	716441	781808	1.12999e+06	1
High	Master Protein	Q9CRS5	Uncharacterized protein [OS=Mus musculus]	0	6.083	4	1	14	1	333	34.6	9.95	137	3.77	1	1	Pf00076, Pf00641, Pf14259	14030	Ewsr1		317426	715792	392294	190464	223129	312517	224560	190464	1
High	Master Protein	Q9CS06	Uncharacterized protein [OS=Mus musculus]	0	36.305	18	7	54	7	458	49.9	5.77	724	50.58	7	7	Pf00118	12469	Cct8		1.00365e+07	6.77592e+06	3.33567e+06	7.85994e+06	7.05502e+06	2.95838e+06	1.90944e+06	7.85994e+06	1
High	Master Protein	Q9CSC2	Uncharacterized protein [OS=Mus musculus]	0.007	2.069	7	1	8	1	132	15.4	9.07	29	3.31	1	1	Pf00787	54198	Snx3		449375	979776	449795	338096	315881	427773	257476	338096	1
Medium	Master Protein	Q9CSU2	Uncharacterized protein [OS=Mus musculus]	0.012	1.667	3	1	9	1	259	28.8	7.06	25	0	1	1	Pf01398, Pf13012, Pf14464	59029	Psmd14		3.74559e+06	4.71897e+06	3.53553e+06	2.658e+06	2.63291e+06	2.06031e+06	2.02384e+06	2.658e+06	1
High	Master Protein	Q9CT19	Uncharacterized protein [OS=Mus musculus]	0	12.895	13	3	20	2	191	21.7	9.86	269	18.52	3	3	Pf00505, Pf09011	97165	Hmgb2		296655	656267	472022	62074.7	208529	286528	270199	62074.7	1
High	Master Protein	Q9CT23	Uncharacterized protein [OS=Mus musculus]	0	6.308	5	2	18	2	422	49.5	6.02	130	14.57	2	2	Pf01399, Pf09440	16341	Eif3e		891867	1.0083e+06	534050	695258	626924	440228	305706	695258	1
High	Master Protein	Q9CU62	structural maintenance of chromosomes protein 1a [OS=Mus musculus]	0	10.944	3	3	13	3	1233	143.1	7.64	114	7.67	3	3	Pf02463, Pf05262, Pf05557, Pf06470, Pf09726, Pf09731, Pf10186, Pf12128, Pf13175, Pf13304, Pf13476, Pf13555, Pf13558	24061	Smc1a	ENSMUSG00000041133.11	335344	650853	325911	208622	235725	284164	186561	208622	1
High	Master Protein	Q9CVB6	Actin-related protein 2/3 complex subunit 2 [OS=Mus musculus]	0	19.588	14	4	14	4	300	34.3	7.36	71	6.64	4	4	Pf04045	76709	Arpc2	ENSMUSG00000006304.14	1.5395e+06	2.84566e+06	1.09914e+06	1.43752e+06	1.08217e+06	1.24242e+06	629177	1.43752e+06	1
Medium	Master Protein	Q9CWD1	Uncharacterized protein [OS=Mus musculus]	0.019	1.416	6	1	2	1	177	19.9	9.19	0	0	1	1	Pf03661	67878	Tmem33			195569	81805	64788.7		85385.9	46827.6	64788.7	1
High	Master Protein	Q9CWF2	Tubulin beta-2B chain [OS=Mus musculus]	0	95.831	34	14	271	1	445	49.9	4.89	2911	255.51	14	13	Pf00091, Pf03953, Pf10644	73710	Tubb2b	ENSMUSG00000045136.5	334865	1.08206e+06	396867	389597	235388	472432	227178	389597	1	Oxidation [P70; K324]
High	Master Protein	Q9CWJ9	bifunctional purine biosynthesis protein purH [OS=Mus musculus]	0.001	5.247	2	1	9	1	592	64.2	6.76	25	13.92	1	1	Pf01808, Pf02142	108147	Atic	ENSMUSG00000026192.13	234454	615569	255877	279016	164806	268759	146472	279016	1
High	Master Protein	Q9CWS0	N(G),N(G)-dimethylarginine dimethylaminohydrolase 1 [OS=Mus musculus]	0	6.155	7	2	8	2	285	31.4	5.97	45	1.98	2	2	Pf02274	69219	Ddah1	ENSMUSG00000028194.15	116268	134850	139576	76809.9	81729	58875.7	79897.6	76809.9	1
High	Master Protein	Q9CWS5	Uncharacterized protein [OS=Mus musculus]	0	70.63	54	7	168	2	142	15.1	7.72	2107	238.99	6	6	Pf00042	110257	Hba-a2		7.7099e+07	1.23619e+08	3.64015e+07	5.45189e+07	5.41956e+07	5.39725e+07	2.08373e+07	5.45189e+07	1	Oxidation [K17]
High	Master Protein	Q9CX86	Heterogeneous nuclear ribonucleoprotein A0 [OS=Mus musculus]	0	32.861	14	3	20	2	305	30.5	9.31	442	28.4	2	3	Pf00076, Pf13893, Pf14259	77134	Hnrnpa0	ENSMUSG00000007836.6	252504	1.08941e+06	877376	241377	177494	475640	502236	241377	1
High	Master Protein	Q9CXX1	Uncharacterized protein [OS=Mus musculus]	0	8.542	8	2	8	2	295	33.2	5.35	100	6.7	2	2	Pf14938	108124	Napa		279061	278962		373167	196161	121796		373167	1
High	Master Protein	Q9CXX7	Uncharacterized protein [OS=Mus musculus]	0.001	5.613	6	2	16	2	287	32.2	9.88	112	7.21	2	2	Pf00076, Pf13893, Pf14259	53607	Snrpa		1.32673e+06	1.88703e+06	1.17951e+06	1.02245e+06	932606	823883	675185	1.02245e+06	1
High	Master Protein	Q9CXY0	Uncharacterized protein [OS=Mus musculus]	0	8.196	12	2	8	2	206	23.6	7.15	44	6.1	2	2	Pf00025, Pf00071, Pf08477	56044	Rala		747173	839352	430826	432233	525214	366463	246618	432233	1
High	Master Protein	Q9CY06	Uncharacterized protein [OS=Mus musculus]	0	87.385	51	6	232	1	142	15.1	8.22	3661	325.65	6	5	Pf00042	15122	Hba-a1		9.81911e+07	1.5172e+08	5.15914e+07	7.281e+07	6.90219e+07	66241321	2.95324e+07	7.281e+07	1
High	Master Protein	Q9CYL5	Golgi-associated plant pathogenesis-related protein 1 [OS=Mus musculus]	0	13.05	17	2	14	2	154	17.1	9.51	290	17.52	2	2	Pf00188	384009	Glipr2	ENSMUSG00000028480.14	261568	548302	180415	155757	183865	239390	103275	155757	1
High	Master Protein	Q9CZ13	Cytochrome b-c1 complex subunit 1, mitochondrial [OS=Mus musculus]	0	9.701	6	3	16	3	480	52.8	6.21	114	3.75	3	3	Pf00675, Pf05193, Pf08367	22273	Uqcrc1	ENSMUSG00000025651.14; ENSMUSG00000107235.3	926227	1.87675e+06	997245	830658	651077	819395	570852	830658	1
High	Master Protein	Q9CZI7	Annexin [OS=Mus musculus]	0	94.863	42	15	178	15	339	38.6	7.65	3608	266.76	14	15	Pf00191	12306	Anxa2		5.61276e+07	5.05325e+07	2.77821e+07	3.7383e+07	3.9454e+07	2.20626e+07	1.59033e+07	3.7383e+07	1
High	Master Protein	Q9CZP6	Uncharacterized protein [OS=Mus musculus]	0	35.969	38	9	98	9	243	26.6	9.73	786	81.28	9	9	Pf00189, Pf07650	27050	Rps3		8.85666e+06	1.04273e+07	1.12039e+07	7.69281e+06	6.22565e+06	4.55257e+06	6.41345e+06	7.69281e+06	1	Oxidation [P234]
High	Master Protein	Q9CZU6	citrate synthase, mitochondrial [OS=Mus musculus]	0	25.998	14	6	50	6	464	51.7	8.57	551	48.69	6	6	Pf00285	12974	Cs	ENSMUSG00000005683.8	4.22758e+06	7.53617e+06	3.53111e+06	3.89033e+06	2.97171e+06	3.29031e+06	2.02131e+06	3.89033e+06	1
High	Master Protein	Q9CZW5	Mitochondrial import receptor subunit TOM70 [OS=Mus musculus]	0.001	3.897	1	1	4	1	611	67.5	7.53	32	2.15	1	1	Pf00515, Pf07719, Pf13414	28185	Tomm70a	ENSMUSG00000022752.8	207361	339259	134403	158343	145761	148121	76935.9	158343	1
High	Master Protein	Q9D0M5	Dynein light chain 2, cytoplasmic [OS=Mus musculus]	0	9.028	25	2	6	2	89	10.3	7.37	30	2.15	2	2	Pf01221	68097	Dynll2	ENSMUSG00000020483.14	763686	630897	457716	470058	536822	275451	262010	470058	1
High	Master Protein	Q9D0T1	NHP2-like protein 1 [OS=Mus musculus]	0.001	4.625	9	1	10	1	128	14.2	8.46	127	13.42	1	1	Pf01248	20826; 100862468	Nhp2l1; Snu13; LOC100862468	ENSMUSG00000063480.7	480911	891281	568895	284812	338049	389136	325652	284812	1
High	Master Protein	Q9D1D4	Transmembrane emp24 domain-containing protein 10 [OS=Mus musculus]	0	25.561	17	4	36	4	219	24.9	6.7	203	15.44	4	4	Pf01105	68581	Tmed10	ENSMUSG00000021248.8	1.42733e+06	1.09253e+06	2.40984e+06	2.92505e+06	1.00332e+06	477000	1.37946e+06	2.92505e+06	1	Oxidation [K87]
High	Master Protein	Q9D1G1	ras-related protein Rab-1B [OS=Mus musculus]	0	18.707	22	4	31	2	201	22.2	5.73	106	33.29	2	4	Pf00025, Pf00071, Pf01926, Pf04670, Pf08477, Pf09439	76308	Rab1b	ENSMUSG00000024870.5	1.13552e+07	1.58392e+07	8.457e+06	8.08794e+06	7.98196e+06	6.91546e+06	4.84103e+06	8.08794e+06	1
High	Master Protein	Q9D1R6	Uncharacterized protein [OS=Mus musculus]	0	54.66	22	9	71	1	284	32.8	4.69	962	84.71	9	9	Pf00261, Pf12718	22004	Tpm2		173775	434301	231101	170204	122153	189617	132289	170204	1
High	Master Protein	Q9D1R9	60S ribosomal protein L34 [OS=Mus musculus]	0.001	5.261	13	2	24	2	117	13.3	11.47	279	24.17	2	2	Pf01199	619547; 68436; 100043876	Rpl34-ps1; Rpl34; Gm4705	ENSMUSG00000062006.12	2.91164e+06	5.34381e+06	3.98617e+06	2.57447e+06	2.0467e+06	2.33312e+06	2.2818e+06	2.57447e+06	1
High	Master Protein	Q9D2D1	carboxypeptidase [OS=Mus musculus]	0.001	4.168	2	1	2	1	474	53.8	5.86	30	0	1	1	Pf00450	19025	Ctsa		117837	260521	95410.6	65779.7	82831.9	113744	54615.8	65779.7	1
High	Master Protein	Q9D3D9	ATP synthase subunit delta, mitochondrial [OS=Mus musculus]	0	6.858	8	1	2	1	168	17.6	5.08	53	2.35	1	1	Pf02823	66043	Atp5d	ENSMUSG00000003072.15	132338	361464	162976	145431	93025.3	157816	93292.1	145431	1
Medium	Master Protein	Q9D6A4	Transthyretin [OS=Mus musculus]	0.018	1.451	7	1	2	1	147	15.7	6.15	23	0	1	1	Pf00576	22139	Ttr		177139	192279	169102	77644.4	124517	83949.7	96799.1	77644.4	1
High	Master Protein	Q9D6F7	Uncharacterized protein [OS=Mus musculus]	0	6.639	8	1	12	1	172	19	5.78	219	9.26	1	1	Pf05404	20832	Ssr4		210717	384573	161188	193944	148120	167905	92268.9	193944	1
High	Master Protein	Q9D6G1	heterogeneous nuclear ribonucleoprotein A/B, isoform CRA_b [OS=Mus musculus]	0	21.467	13	3	31	2	276	29.9	6.42	479	40.68	3	3	Pf00076, Pf08143, Pf13893, Pf14259	15384	Hnrnpab		1.93641e+06	3.51508e+06	2.22284e+06	1121571	1.36117e+06	1534693	1.27242e+06	1121571	1
Medium	Master Protein	Q9D6K8	FUN14 domain-containing protein 2 [OS=Mus musculus]	0.016	1.514	8	1	2	1	151	16.6	9.7	0	0	1	1	Pf04930	67391	Fundc2	ENSMUSG00000031198.4		215540	92992.2	86520.1		94105.3	53231.4	86520.1	1
High	Master Protein	Q9D708	Protein S100-A16 [OS=Mus musculus]	0	7.668	10	1	4	1	124	14.3	5.86	79	4.61	1	1	Pf01023, Pf13499	67860	S100a16	ENSMUSG00000074457.10	620646	84567.6	179646	409613	436274	36922.4	102835	409613	1
High	Master Protein	Q9D7B2	LIM and senescent cell antigen-like-containing domain protein [OS=Mus musculus]	0.007	1.952	3	1	2	1	396	45.6	7.88	0	1.82	1	1	Pf00412	110829	Lims1	ENSMUSG00000019920.17	1.08303e+06	1.50187e+06	1.49834e+06	1.38467e+06	761299	655723	857695	1.38467e+06	1
High	Master Protein	Q9D7J7	calpain small subunit 2 [OS=Mus musculus]	0	10.519	8	2	10	1	247	27.2	5.48	114	6.65	2	2	Pf13833	69543	Capns2	ENSMUSG00000078144.4	1.70457e+06	1.06161e+06	750206	1.12741e+06	1.1982e+06	463503	429440	1.12741e+06	1
High	Master Protein	Q9D7N9	Adipocyte plasma membrane-associated protein [OS=Mus musculus]	0.005	2.321	2	1	4	1	415	46.4	6.32	27	0	1	1	Pf03088, Pf08450	71881	Apmap	ENSMUSG00000033096.7	228534	226119		115835	160645	98724.4		115835	1
High	Master Protein	Q9D7S7	60S ribosomal protein L22-like 1 [OS=Mus musculus]	0	13.763	10	1	26	1	122	14.5	9.45	362	31.5	1	1	Pf01776	68028	Rpl22l1	ENSMUSG00000039221.10	985747	1.88581e+06	1.36734e+06	745952	692916	823350	782705	745952	1
High	Master Protein	Q9D859	Uncharacterized protein [OS=Mus musculus]	0	15.161	22	4	40	3	192	21.5	8.5	369	28.44	4	4	Pf00025, Pf00071, Pf08477	19353	Rac1		2.9161e+06	4.78602e+06	2.61749e+06	2.64114e+06	2.04983e+06	2.08959e+06	1.49833e+06	2.64114e+06	1
High	Master Protein	Q9D8B3	Charged multivesicular body protein 4b [OS=Mus musculus]	0	6.822	6	1	14	1	224	24.9	4.82	216	15.12	1	1	Pf03357	75608	Chmp4b	ENSMUSG00000038467.15	381878	521028	381364	270541	268435	227482	218304	270541	1
High	Master Protein	Q9D8E6	60S ribosomal protein L4 [OS=Mus musculus]	0	58.785	23	9	120	9	419	47.1	11	1258	148.42	9	9	Pf00573, Pf14374	67891	Rpl4	ENSMUSG00000032399.8	8.8871e+06	1.25378e+07	7.42462e+06	7.13487e+06	6.24705e+06	5.47405e+06	4.25007e+06	7.13487e+06	1
High	Master Protein	Q9D8N0	elongation factor 1-gamma [OS=Mus musculus]	0	39.276	20	8	71	8	437	50	6.74	809	69.34	8	8	Pf00043, Pf00647, Pf02798, Pf13409, Pf13410, Pf13417, Pf14497	67160	Eef1g	ENSMUSG00000071644.10	8.00287e+06	1.46375e+07	7.68262e+06	5.98803e+06	5.62549e+06	6.39079e+06	4.39775e+06	5.98803e+06	1	Oxidation [P259]
High	Master Protein	Q9D9P1	MICOS complex subunit [OS=Mus musculus]	0.001	4.749	13	2	7	2	175	20.4	8.27	32	2.03	2	2	Pf05300	66075	Chchd3	ENSMUSG00000053768.13	215334	413802	170755	254002	151366	180667	97745.3	254002	1
High	Master Protein	Q9DAK9	14 kDa phosphohistidine phosphatase [OS=Mus musculus]	0	6.11	10	1	10	1	124	14	5.53	161	9.51	1	1	Pf05005	75454	Phpt1	ENSMUSG00000036504.6	173019	211387	169478	155033	121621	92292.3	97014.4	155033	1
High	Master Protein	Q9DAW9	Calponin-3 [OS=Mus musculus]	0	22.573	18	5	22	5	330	36.4	5.72	201	21.9	5	5	Pf00307, Pf00402	71994	Cnn3	ENSMUSG00000053931.11	1.34687e+06	4.60659e+06	2.07471e+06	1.5282e+06	946765	2.01125e+06	1.18762e+06	1.5282e+06	1
High	Master Protein	Q9DB15	39S ribosomal protein L12, mitochondrial [OS=Mus musculus]	0.001	4.446	6	1	4	1	201	21.7	9.29	14	3.89	1	1	Pf00542	56282	Mrpl12	ENSMUSG00000039640.7	253992	262614	234740	199855	178540	114658	134372	199855	1
High	Master Protein	Q9DB20	ATP synthase subunit O, mitochondrial [OS=Mus musculus]	0	9.736	9	2	16	2	213	23.3	9.99	328	20.23	2	2	Pf00213	28080; 102641678	Atp5o; LOC100047429; LOC102641678	ENSMUSG00000022956.10	1.90859e+06	3.65443e+06	1.76157e+06	1.49507e+06	1.34162e+06	1.59554e+06	1.00837e+06	1.49507e+06	1
High	Master Protein	Q9DB77	Cytochrome b-c1 complex subunit 2, mitochondrial [OS=Mus musculus]	0	16.197	9	3	18	3	453	48.2	9.25	401	21.75	3	3	Pf00675, Pf05193	67003	Uqcrc2	ENSMUSG00000030884.12	769779	2.42427e+06	1.05447e+06	600558	541104	1.05844e+06	603607	600558	1
High	Master Protein	Q9DBG5	Perilipin-3 [OS=Mus musculus]	0	9.683	8	3	12	3	437	47.2	5.62	79	3.7	3	3	Pf03036	66905	Plin3	ENSMUSG00000024197.9	561070	1.53408e+06	478758	457131	394395	669781	274055	457131	1
High	Master Protein	Q9DBH1	Uncharacterized protein [OS=Mus musculus]	0	2.884	2	1	2	1	752	88.3	9.89	20	1.98	1	1	Pf00505, Pf09011, Pf14887	21429	Ubtf		87152.1	141566	137908	69624.4	61262.2	61808.3	78942.7	69624.4	1
High	Master Protein	Q9DBJ1	Phosphoglycerate mutase 1 [OS=Mus musculus]	0	31.866	24	5	63	5	254	28.8	7.18	548	60.7	5	5	Pf00300	18648	Pgam1	ENSMUSG00000011752.6	3.81451e+06	1.87275e+06	3.04438e+06	3.83563e+06	2.68135e+06	817649	1.74269e+06	3.83563e+06	1
High	Master Protein	Q9DBP5	UMP-CMP kinase [OS=Mus musculus]	0.001	4.48	5	1	10	1	196	22.2	5.83	127	8.62	1	1	Pf00406, Pf02223, Pf13207, Pf13238, Pf13671	66588	Cmpk1		535787	632238	229834	424744	376623	276037	131564	424744	1
High	Master Protein	Q9DBR7-1	Protein phosphatase 1 regulatory subunit 12A [OS=Mus musculus]	0.004	2.509	1	1	2	1	1029	114.9	5.49	36	1.97	1	1	Pf00023, Pf03961, Pf12796, Pf13606, Pf13637, Pf13857	17931	Ppp1r12a	ENSMUSG00000019907.10	101992	149172	89266.3	97828.1	71693.7	65129	51098.6	97828.1	1
High	Master Protein	Q9DC51	Guanine nucleotide-binding protein G(k) subunit alpha [OS=Mus musculus]	0	13.631	12	4	16	1	354	40.5	5.69	41	16.21	3	4	Pf00025, Pf00503	14679	Gnai3	ENSMUSG00000000001.4	97832.2	274045	151406	134914	68769.7	119649	86669.1	134914	1
High	Master Protein	Q9DCC5	CBX3 protein [OS=Mus musculus]	0	28.651	21	4	41	4	183	20.8	5.33	454	43.06	4	4	Pf00385, Pf01393	12417	Cbx3	ENSMUSG00000029836.15	1.92777e+06	2.54279e+06	2.46527e+06	1.35037e+06	1.3551e+06	1.11019e+06	1.41119e+06	1.35037e+06	1
High	Master Protein	Q9DCD0	6-phosphogluconate dehydrogenase, decarboxylating [OS=Mus musculus]	0	25.21	17	6	39	6	483	53.2	7.23	240	30.31	5	6	Pf00393, Pf03446	110208	Pgd	ENSMUSG00000028961.15	817386	1.94342e+06	892754	1.54714e+06	574569	848501	511038	1.54714e+06	1
High	Master Protein	Q9DCD8	Proteasome subunit alpha type [OS=Mus musculus]	0	13.425	9	2	30	2	255	28.5	5.57	504	32.17	2	2	Pf00227, Pf10584	19167	Psma3		2.94419e+06	2.24035e+06	1.34848e+06	1.33439e+06	2.06957e+06	978144	771911	1.33439e+06	1
High	Master Protein	Q9DCJ9	N-acetylneuraminate lyase [OS=Mus musculus]	0.001	4.657	3	1	8	1	320	35.1	8.03	62	2.99	1	1	Pf00701	74091	Npl	ENSMUSG00000042684.8	361046	852479	270534	672965	253791	372195	154862	672965	1
High	Master Protein	Q9DCN2	NADH-cytochrome b5 reductase 3 [OS=Mus musculus]	0	14.075	10	3	22	3	301	34.1	8.38	243	23.15	3	3	Pf00175, Pf00970	109754	Cyb5r3	ENSMUSG00000018042.17	605553	2.59578e+06	1.14369e+06	1.3751e+06	425664	1133323	654683	1.3751e+06	1
High	Master Protein	Q9DCW4	electron transfer flavoprotein subunit beta [OS=Mus musculus]	0	20.976	17	4	52	4	255	27.6	8.1	451	45.16	4	4	Pf01012	110826	Etfb	ENSMUSG00000004610.4	1.35528e+06	3.299e+06	1.10051e+06	1.40785e+06	952674	1.44035e+06	629965	1.40785e+06	1
High	Master Protein	Q9DCX2	ATP synthase subunit d, mitochondrial [OS=Mus musculus]	0	17.903	31	4	30	4	161	18.7	5.69	291	33.99	4	4	Pf05873	71679	Atp5h	ENSMUSG00000034566.10	925901	2.73277e+06	1.36334e+06	870691	650848	1.19313e+06	780415	870691	1
High	Master Protein	Q9DCY0	Glycine N-acyltransferase-like protein Keg1 [OS=Mus musculus]	0	3.267	5	1	2	1	295	33.7	8.43	25	0	1	1	Pf06021, Pf08444	64697	Keg1	ENSMUSG00000024694.9	147588	241470	60957.6	119134	103745	105426	34893.9	119134	1
Medium	Master Protein	Q9DCZ4	MICOS complex subunit MIC26 [OS=Mus musculus]	0.022	1.28	6	1	1	1	198	22.6	9.25	0		1		Pf09769	68316	Apoo	ENSMUSG00000049233.6; ENSMUSG00000079508.8	591684	846584	1.17224e+06	476203	415915	369621	671025	476203	1
High	Master Protein	Q9EP69	Phosphatidylinositide phosphatase SAC1 [OS=Mus musculus]	0.001	4.445	3	2	4	2	587	66.9	7.3	26	1.97	2	2	Pf02383	83493	Sacm1l	ENSMUSG00000025240.9	283823	395393	139842	227287	199509	172630	80049.5	227287	1
High	Master Protein	Q9EPC1	alpha-parvin [OS=Mus musculus]	0	9.876	9	3	18	3	372	42.3	5.95	156	15.31	3	3	Pf00307	57342	Parva	ENSMUSG00000030770.15	2.78243e+06	3.30988e+06	1.6071e+06	1.58149e+06	1.95587e+06	1.4451e+06	919951	1.58149e+06	1
High	Master Protein	Q9EQH3	Vacuolar protein sorting-associated protein 35 [OS=Mus musculus]	0	6.815	3	2	4	2	796	91.7	5.44	31	1.91	2	2	Pf03635	65114	Vps35	ENSMUSG00000031696.9	1.99362e+06	3.49419e+06	3.67523e+06	1.67249e+06	1.40138e+06	1.52557e+06	2.10381e+06	1.67249e+06	1
High	Master Protein	Q9ERM5	Protein tyrosine phosphatase BK [OS=Mus musculus]	0.001	5.431	1	1	12	1	1226	138.5	6.04	178	10.65	1	1	Pf00041, Pf00102	19277	Ptpro		159419	343901	181834	143366	112061	150148	104087	143366	1
High	Master Protein	Q9ES97-1	Reticulon-3 [OS=Mus musculus]	0	5.965	2	2	7	2	964	103.8	4.92	57	5.52	2	2	Pf02453	20168	Rtn3	ENSMUSG00000024758.14	978837	591321	767862	1.11088e+06	688058	258172	439546	1.11088e+06	1
High	Master Protein	Q9EST1	gasdermin-A [OS=Mus musculus]	0	5.8	4	2	7	2	446	49.6	5.57	45	2.25	2	1	Pf04598	57911	Gsdma	ENSMUSG00000017204.4	2.75852e+06	1.54639e+06	1.45778e+06	1415711	1939058	675160	834473	1415711	1
High	Master Protein	Q9EST5-1	Acidic leucine-rich nuclear phosphoprotein 32 family member B [OS=Mus musculus]	0	18.398	17	5	41	2	272	31.1	4.01	332	39.39	5	5	Pf12799, Pf13855, Pf14580	67628	Anp32b	ENSMUSG00000028333.10	6.23172e+06	9.6733e+06	4.67415e+06	5.41196e+06	4380489	4.22339e+06	2.67562e+06	5.41196e+06	1
High	Master Protein	Q9JHL1	Na(+)/H(+) exchange regulatory cofactor NHE-RF2 [OS=Mus musculus]	0	13.83	8	2	8	2	337	37.4	7.59	112	8.83	2	2	Pf00595, Pf09007, Pf13180	65962	Slc9a3r2		223073	1.41671e+06	795896	307954	156806	618538	455594	307954	1
High	Master Protein	Q9JHU4	Cytoplasmic dynein 1 heavy chain 1 [OS=Mus musculus]	0	30.457	3	10	52	10	4644	531.7	6.42	401	29.44	10	9	Pf00769, Pf03028, Pf03915, Pf04156, Pf07246, Pf07728, Pf08385, Pf08393, Pf12774, Pf12775, Pf12777, Pf12780, Pf12781, Pf13173, Pf13207, Pf13401	13424	Dync1h1	ENSMUSG00000018707.13	1.15045e+06	2.2398e+06	1.28591e+06	1.60747e+06	808691	977902	736089	1.60747e+06	1	Oxidation [K504]
High	Master Protein	Q9JI95	CPN10-like protein [OS=Mus musculus]	0	13.395	24	2	22	2	102	11	8.92	421	36.21	2	2	Pf00166	628438	Hspe1-rs1		2.51381e+06	5.98374e+06	3.33977e+06	1.84152e+06	1.76704e+06	2.61252e+06	1.91178e+06	1.84152e+06	1
High	Master Protein	Q9JII5	DAZ-associated protein 1 [OS=Mus musculus]	0	16.526	10	3	19	3	406	43.2	8.56	159	8.09	3	3	Pf00076, Pf13893, Pf14259	70248	Dazap1	ENSMUSG00000069565.12	147099	1.38571e+06	630195	143618	103401	605003	360742	143618	1
High	Master Protein	Q9JIL4	Na(+)/H(+) exchange regulatory cofactor NHE-RF3 [OS=Mus musculus]	0.001	5.68	4	2	4	2	519	56.5	5.43	41	3.75	2	2	Pf00595, Pf13180	59020	Pdzk1		628733	800949	384049	458775	441958	349697	219841	458775	1
High	Master Protein	Q9JJV2-1	Profilin-2 [OS=Mus musculus]	0.001	5.376	10	1	4	1	140	15	6.99	42	1.89	1	1	Pf00235	18645	Pfn2	ENSMUSG00000027805.16	119763	356359	131669		84185.9	155587	75371.2		1
High	Master Protein	Q9JKF1	Ras GTPase-activating-like protein IQGAP1 [OS=Mus musculus]	0	19.187	4	5	26	5	1657	188.6	6.48	306	21.55	5	5	Pf00307, Pf00616, Pf03836, Pf11016	29875	Iqgap1	ENSMUSG00000030536.10	1.44652e+06	1.38612e+06	400046	764553	1.01681e+06	605184	228998	764553	1	Oxidation [P864]
High	Master Protein	Q9JKR6	Hypoxia up-regulated protein 1 [OS=Mus musculus]	0	10.269	3	3	21	3	999	111.1	5.19	67	5.53	3	3	Pf00012	12282	Hyou1	ENSMUSG00000032115.14	422714	653095	280462	337244	297140	285143	160545	337244	1
High	Master Protein	Q9JLF6	Protein-glutamine gamma-glutamyltransferase K [OS=Mus musculus]	0	14.507	5	4	24	4	815	89.8	6.51	142	14.09	4	4	Pf00868, Pf00927, Pf01841	21816	Tgm1		4.02428e+06	540359	3.73425e+06	2.13556e+06	2.8288e+06	235922	2.13759e+06	2.13556e+06	1
High	Master Protein	Q9JM76	Actin-related protein 2/3 complex subunit 3 [OS=Mus musculus]	0	14.862	16	3	20	3	178	20.5	8.59	157	13.46	3	3	Pf04062	56378	Arpc3	ENSMUSG00000029465.14	2.99026e+06	5.34892e+06	1.69819e+06	2.10488e+06	2.10195e+06	2.33535e+06	972093	2.10488e+06	1
Medium	Master Protein	Q9JME4	E25B protein [OS=Mus musculus]	0.018	1.484	4	1	2	1	210	24.1	5.3	0	0	1	1	Pf04089	16432	Itm2b		247024	492537		210452	173642	215043		210452	1
High	Master Protein	Q9QUI0	Transforming protein RhoA [OS=Mus musculus]	0	21.424	25	4	57	3	193	21.8	6.1	348	26.81	4	4	Pf00025, Pf00071, Pf08477	11848	Rhoa	ENSMUSG00000007815.13	3.82559e+06	4.80637e+06	2.46766e+06	2.80193e+06	2.68914e+06	2.09848e+06	1.41256e+06	2.80193e+06	1
High	Master Protein	Q9QUM9	Proteasome subunit alpha type-6 [OS=Mus musculus]	0	14.279	13	4	26	4	246	27.4	6.76	353	27.17	4	4	Pf00227, Pf10584	26443	Psma6	ENSMUSG00000021024.14	5.76081e+06	7.26294e+06	4.73739e+06	3.15851e+06	4049470	3.17102e+06	2.71182e+06	3.15851e+06	1
High	Master Protein	Q9QWL7	Keratin, type I cytoskeletal 17 [OS=Mus musculus]	0	245.527	46	28	739	7	433	48.1	5.06	9624	976.73	27	28	Pf00038, Pf01576, Pf07888	16667	Krt17	ENSMUSG00000035557.9	1.32122e+09	6.25572e+08	1.47114e+09	1.70626e+09	9.2873e+08	2.73126e+08	8.42121e+08	1.70626e+09	1
High	Master Protein	Q9QXD6	Fructose-1,6-bisphosphatase 1 [OS=Mus musculus]	0	6.448	4	1	2	1	338	36.9	6.57	44	3.2	1	1	Pf00316, Pf00459	14121	Fbp1	ENSMUSG00000069805.10		134038	205740	97500.9		58521.6	117772	97500.9	1
Medium	Master Protein	Q9QXP0	Ammonium transporter Rh type C [OS=Mus musculus]	0.01	1.677	1	1	1	1	498	54.9	6.8	29		1		Pf00909	56315	Rhcg	ENSMUSG00000030549.6	237975	96700.4		1.53109e+06	167281	42219.6		1.53109e+06	1
High	Master Protein	Q9QXY6	EH domain-containing protein 3 [OS=Mus musculus]	0	16.731	8	4	42	4	535	60.8	6.46	468	30.99	4	4	Pf00350, Pf01926, Pf12763	57440	Ehd3	ENSMUSG00000024065.7	1.5117e+06	2.98398e+06	1.18302e+06	1.50415e+06	1.06262e+06	1.30282e+06	677194	1.50415e+06	1
High	Master Protein	Q9QYB1	Chloride intracellular channel protein 4 [OS=Mus musculus]	0	12.709	20	4	20	4	253	28.7	5.59	94	13.07	4	4	Pf00043, Pf13409, Pf13410, Pf13417, Pf14497	29876	Clic4	ENSMUSG00000037242.8	686205	869141	262735	483952	482357	379469	150397	483952	1
High	Master Protein	Q9QZD9	Eukaryotic translation initiation factor 3 subunit I [OS=Mus musculus]	0	6.508	6	2	8	2	325	36.4	5.64	52	8.13	2	2	Pf00400	54709	Eif3i	ENSMUSG00000028798.16	795308	1.04161e+06	520229	554284	559049	454770	297794	554284	1
High	Master Protein	Q9QZQ8-1	Core histone macro-H2A.1 [OS=Mus musculus]	0	16.444	13	3	14	3	372	39.7	9.8	229	11.91	3	3	Pf00125, Pf01661	26914	H2afy	ENSMUSG00000015937.14	3.07715e+06	4.72065e+06	2.58024e+06	1.0432e+06	2.16304e+06	2.06105e+06	1.477e+06	1.0432e+06	1
High	Master Protein	Q9QZS0	collagen alpha-3(IV) chain [OS=Mus musculus]	0.001	4.307	1	1	22	1	1669	161.6	9.48	216	3.71	1	1	Pf01413	12828	Col4a3	ENSMUSG00000079465.8	437885	913661	427034	420459	307805	398907	244447	420459	1
High	Master Protein	Q9QZS7-1	Nephrin [OS=Mus musculus]	0	15.548	4	3	12	3	1256	136.3	5.59	149	8.61	3	3	Pf00041, Pf00047, Pf07679, Pf08205, Pf13895, Pf13927	54631	Nphs1	ENSMUSG00000006649.17	659536	1.27045e+06	615481	600644	463611	554682	352319	600644	1
High	Master Protein	Q9R0H5	Keratin, type II cytoskeletal 71 [OS=Mus musculus]	0	60.219	14	8	404	3	524	57.3	6.99	5650	461.85	8	8	Pf00038, Pf04111, Pf09726, Pf12128	56735	Krt71	ENSMUSG00000051879.3	1.84231e+06	393883	554200		1.29502e+06	171971	317240		1	Oxidation [K249; K255; K317]
High	Master Protein	Q9R0P3	S-formylglutathione hydrolase [OS=Mus musculus]	0	17.183	14	3	10	3	282	31.3	7.12	41	5.76	3	3	Pf00326, Pf00756, Pf05448, Pf12695, Pf12697	13885	Esd	ENSMUSG00000021996.16	1.17251e+06	1.83644e+06	1.28741e+06	1.17283e+06	824199	801797	736949	1.17283e+06	1
High	Master Protein	Q9R1P1	proteasome subunit beta type-3 [OS=Mus musculus]	0	9.65	15	2	30	2	205	22.9	6.55	165	21.14	2	2	Pf00227	26446	Psmb3	ENSMUSG00000069744.7	1.05832e+06	1.22236e+06	693585	817890	743929	533687	397028	817890	1
High	Master Protein	Q9R1P3	proteasome subunit beta type-2 [OS=Mus musculus]	0	13.569	16	3	24	3	201	22.9	7.02	216	17.59	3	3	Pf00227	26445	Psmb2	ENSMUSG00000028837.8	1.34879e+06	1.35754e+06	963858	979737	948109	592708	551740	979737	1
High	Master Protein	Q9R1Q7	proteolipid protein 2 [OS=Mus musculus]	0.007	1.937	8	1	2	1	152	16.6	7.14	0	0	1	1	Pf01284	18824	Plp2	ENSMUSG00000057762.4; ENSMUSG00000031146.6	217328	451641		156995	152767	197188		156995	1
Medium	Master Protein	Q9R1T2	SUMO-activating enzyme subunit 1 [OS=Mus musculus]	0.019	1.442	3	1	7	1	350	38.6	5.36	0	0	1	1	Pf00899	56459	Sae1	ENSMUSG00000052833.9	183027	379906	139787		128656	165868	80018.2		1	Oxidation [P108]
High	Master Protein	Q9WTI7-1	Unconventional myosin-Ic [OS=Mus musculus]	0	38.839	10	8	39	8	1063	121.9	9.35	438	26.83	8	7	Pf00063, Pf06017	17913	Myo1c	ENSMUSG00000017774.19	2.56654e+06	4.99167e+06	2.4558e+06	2.28366e+06	1.80411e+06	2.17938e+06	1.40577e+06	2.28366e+06	1
High	Master Protein	Q9WTL4	Insulin receptor-related protein [OS=Mus musculus]	0.001	4.905	1	2	26	2	1300	144.8	6.64	69	18.39	2	2	Pf00041, Pf00069, Pf00757, Pf01030, Pf05287, Pf07714	23920	Insrr	ENSMUSG00000005640.11	6.04461e+06	1.22329e+06	2.09216e+06	1.52438e+07	4.24896e+06	534092	1.19761e+06	1.52438e+07	1
Medium	Master Protein	Q9WTS9	Scr3 [OS=Mus musculus]	0.019	1.375	4	1	2	1	356	37.9	8.85	0	0	1	1	Pf00076, Pf13893, Pf14259	56516	Rbms2		160559	357618	200248	149748	112863	156137	114628	149748	1
High	Master Protein	Q9WUM3	Coronin-1B [OS=Mus musculus]	0	7.42	6	3	14	3	484	53.9	5.78	43	0	3	3	Pf00400, Pf08953, Pf08954	23789	Coro1b	ENSMUSG00000024835.14; ENSMUSG00000097771.7	692234	1.83202e+06	198367	776571	486595	799865	113551	776571	1
High	Master Protein	Q9WUM5	Succinate--CoA ligase [ADP/GDP-forming] subunit alpha, mitochondrial [OS=Mus musculus]	0.001	4.831	4	1	8	1	346	36.1	9.39	105	6.92	1	1	Pf00549, Pf02629, Pf13607	56451	Suclg1	ENSMUSG00000052738.14	436382	847512	369542	334482	306748	370026	211537	334482	1
High	Master Protein	Q9WV02-1	RNA-binding motif protein, X chromosome [OS=Mus musculus]	0	31.923	24	8	58	8	391	42.3	10.05	623	47.98	8	8	Pf00076, Pf08081, Pf13893, Pf14259	19655	Rbmx	ENSMUSG00000031134.16	2.04381e+06	4.04696e+06	3.44505e+06	1.58131e+06	1.43666e+06	1.76692e+06	1.97205e+06	1.58131e+06	1
High	Master Protein	Q9WV54	Acid ceramidase [OS=Mus musculus]	0	2.991	3	1	4	1	394	44.6	8.46	33	4.74	1	1	Pf02275, Pf15508	11886	Asah1	ENSMUSG00000031591.14	544038	357082	414520	330009	382423	155903	237283	330009	1
High	Master Protein	Q9WVA4	Transgelin-2 [OS=Mus musculus]	0	44.873	55	11	73	11	199	22.4	8.24	757	58.23	11	11	Pf00307, Pf00402	21346	Tagln2	ENSMUSG00000026547.15	6.0643e+06	1.29794e+07	4.49595e+06	4.99818e+06	4.2628e+06	5.66683e+06	2.57361e+06	4.99818e+06	1	Oxidation [P195]
High	Master Protein	Q9WVE8	Protein kinase C and casein kinase substrate in neurons protein 2 [OS=Mus musculus]	0.003	2.528	2	1	2	1	486	55.8	5.2	24	1.9	1	1	Pf00018, Pf00611, Pf07653, Pf14604	23970	Pacsin2	ENSMUSG00000016664.14	599976	947438	694701	346171	421744	413654	397667	346171	1
High	Master Protein	Q9WVJ2	26S proteasome non-ATPase regulatory subunit 13 [OS=Mus musculus]	0	3.186	3	1	12	1	376	42.8	5.71	69	1.62	1	1	Pf01399	23997	Psmd13	ENSMUSG00000025487.15	163720	286809	144806	191870	115085	125222	82891	191870	1
High	Master Protein	Q9Z1N5	spliceosome RNA helicase DDX39B [OS=Mus musculus]	0	50.474	22	10	89	3	428	49	5.67	997	84.93	10	10	Pf00270, Pf00271, Pf14617	53817	Ddx39b	ENSMUSG00000019432.15	6.44793e+06	1.34926e+07	8.79978e+06	6.74041e+06	4.53247e+06	5.89091e+06	5.03725e+06	6.74041e+06	1
High	Master Protein	Q9Z2I9	Succinate--CoA ligase [ADP-forming] subunit beta, mitochondrial [OS=Mus musculus]	0	9.948	4	2	14	2	463	50.1	7.01	262	12.92	2	2	Pf00549, Pf02222, Pf02786, Pf08442, Pf13535, Pf13549	20916	Sucla2	ENSMUSG00000022110.13	454128	961380	293809	447718	319222	419741	168185	447718	1
High	Master Protein	Q9Z2K1	Keratin, type I cytoskeletal 16 [OS=Mus musculus]	0	169.911	24	16	869	7	469	51.6	5.2	13950	932.65	15	15	Pf00038, Pf13514	16666	Krt16	ENSMUSG00000053797.10	6.59686e+07	3.49194e+07	1.15666e+08	2.0719e+08	4.63716e+07	1.52459e+07	6.62107e+07	2.0719e+08	1	Oxidation [K15; P274]
High	Master Protein	Q9Z2L2	truncated hsp25 [OS=Mus musculus]	0	20.645	30	2	16	1	82	9.4	5.39	218	30.5	2	2	Pf00011	15507	Hspb1		3.26991e+06	1.13206e+06	1.53701e+06	2.93787e+06	2.29853e+06	494259	879832	2.93787e+06	1
High	Master Protein	Q9Z2N8	Actin-like protein 6A [OS=Mus musculus]	0	7.091	8	3	6	3	429	47.4	5.6	72	3.5	3	3	Pf00022	56456	Actl6a	ENSMUSG00000027671.14	406852	784172	186703	178509	285990	342372	106874	178509	1
High	Master Protein	Q9Z2T6	Keratin, type II cuticular Hb5 [OS=Mus musculus]	0	53.412	18	12	116	3	507	55.7	6.42	1140	113	12	11	Pf00038	53622	Krt85		1.54243e+06	954277	8.47972e+07	5.84606e+06	1.08423e+06	416640	4.85404e+07	5.84606e+06	1
High	Master Protein	Q9Z2U1	Proteasome subunit alpha type-5 [OS=Mus musculus]	0	7.279	10	2	20	2	241	26.4	4.79	173	7.18	2	2	Pf00227, Pf10584	26442	Psma5	ENSMUSG00000068749.9	1.47728e+06	453631	1.21942e+06	1.30501e+06	1.03843e+06	198057	698030	1.30501e+06	1
High	Master Protein	Q9Z2X1-1	Heterogeneous nuclear ribonucleoprotein F [OS=Mus musculus]	0	54.176	16	5	80	4	415	45.7	5.49	1462	126.73	5	5	Pf00076, Pf08080, Pf14259	98758	Hnrnpf	ENSMUSG00000042079.13	2.78305e+06	5.73745e+06	3.0968e+06	2.88341e+06	1.95631e+06	2.50499e+06	1.7727e+06	2.88341e+06	1
High	Master Protein	S4R2A9	Protein transport protein Sec31A [OS=Mus musculus]	0	6.157	4	2	7	2	934	101	8.41	49	0	2	1	Pf03154, Pf12931			ENSMUSG00000035325.16	3.26495e+06	1.60757e+06	774902	1.40749e+06	2.29504e+06	701869	443576	1.40749e+06	1	Oxidation [P13; K21; K24]
High	Master Protein	Z4YJD9	Keratin, type I cytoskeletal 12 [OS=Mus musculus]	0	5.966	6	2	4	2	487	52.5	4.84	58	4.52	2	2	Pf00038	268482	Krt12	ENSMUSG00000020912.4	834849	563875	1.02529e+06	9.96322e+06	586844	246189	586907	9.96322e+06	1

## Sheet: E19 mouse mature gloms (matrix)
Matrix proteins
	Protein FDR Confidence: Combined	Accession	Gene Symbol	Description	# Unique Peptides	# AAs	MW [kDa]	Abundances (Normalized): F1	Abundances (Normalized): F2	Abundances (Normalized): F3	Abundances (Normalized): F4	Modifications	Source	Division	Category
Basement membrane protein	High	E9QPX1	Col18a1	Collagen alpha-1(XVIII) chain	4	1774	182.2	2.66746e+06	4.52053e+06	1.82118e+06	1.99355e+06	Oxidation [P886; P887; P889; P890; P892; P893; P895]	Matrisome (Mouse)	Core matrisome	Collagens
Basement membrane protein	High	P02463	Col4a1	Collagen alpha-1(IV) chain	7	1669	160.6	4.03798e+06	1.14056e+07	3.54211e+06	3.55007e+06	Oxidation [P301; P304; P310; P313; P349; P352; P588; P594; P647; P648; P654; P657; P660]	Matrisome (Mouse)	Core matrisome	Collagens
Basement membrane protein	High	P08122	Col4a2	Collagen alpha-2(IV) chain	6	1707	167.2	5.84241e+06	1.68117e+07	6.72219e+06	4.27453e+06	Oxidation [P114; P120; P123; P128; P768; P776; P1497]	Matrisome (Mouse)	Core matrisome	Collagens
Basement membrane protein	High	Q9QZS0	Col4a3	Collagen alpha-3(IV) chain	1	1669	161.6	437885	913661	427034	420459	-	Matrisome (Mouse)	Core matrisome	Collagens
Basement membrane protein	Medium	O88207	Col5a1	Collagen alpha-1(V) chain	1	1838	183.6	166013	201199	95587.9	81401.7	-	Matrisome (Mouse)	Core matrisome	Collagens
Basement membrane protein	High	Q66K11	Col6a3	Collagen alpha-3(VI) chain	1	373	39.2	117093	318646	125379	117223	-	Matrisome (Mouse)	Core matrisome	Collagens
Basement membrane protein	High	A2ASQ1-1	Agrn	Agrin	9	1950	207.4	1.63826e+06	5.04581e+06	1.34301e+06	1.52548e+06	-	Matrisome (Mouse)	Core matrisome	ECM Glycoproteins
Basement membrane protein	High	Q61555	Fbn2	Fibrillin-2	4	2907	313.6	259275	477897	177948	73157.4	-	Matrisome (Mouse)	Core matrisome	ECM Glycoproteins
Basement membrane protein	High	A0A087WS56	Fn1	Fibronectin	42	2266	249.4	3.42952e+07	7.51983e+07	2.55369e+07	2.50934e+07	Oxidation [P1279; K1543; P1544]	Matrisome (Mouse)	Core matrisome	ECM Glycoproteins
Basement membrane protein	High	Q80T14	Fras1	Extracellular matrix protein FRAS1	2	4010	442.1	223622	178819	-	242980	-	Matrisome (Mouse)	Core matrisome	ECM Glycoproteins
Basement membrane protein	High	Q61001	Lama5	Laminin subunit alpha-5	25	3718	403.8	1.3514e+07	2.33921e+07	2.66497e+07	1.70374e+07	Oxidation [P3236]	Matrisome (Mouse)	Core matrisome	ECM Glycoproteins
Basement membrane protein	High	B9EKB0	Lamb1	Laminin B1 subunit 1	9	1834	202.3	1.63935e+06	5.29513e+06	1.62041e+06	1.71195e+06	-	Matrisome (Mouse)	Core matrisome	ECM Glycoproteins
Basement membrane protein	High	Q61292	Lamb2	Laminin subunit beta-2	11	1799	196.5	7.15668e+06	1.00499e+07	6.2279e+06	6.19e+06	-	Matrisome (Mouse)	Core matrisome	ECM Glycoproteins
Basement membrane protein	High	F8VQJ3	Lamc1	Laminin subunit gamma-1	2	1607	177.1	6.98768e+06	1.9336e+07	7.08477e+06	7.63817e+06	-	Matrisome (Mouse)	Core matrisome	ECM Glycoproteins
Basement membrane protein	High	P10493	Nid1	Nidogen-1	7	1245	136.5	2.0852e+06	6.23749e+06	1.83618e+06	2.24299e+06	-	Matrisome (Mouse)	Core matrisome	ECM Glycoproteins
Basement membrane protein	High	Q8C6Z2	Nid2	Nidogen-2	3	1294	141.1	507419	1.29485e+06	372423	94170.6	-	Matrisome (Mouse)	Core matrisome	ECM Glycoproteins
Basement membrane protein	High	D3Z4D3	Npnt	Nephronectin	2	532	58.1	294132	779673	251827	247504		Matrisome (Mouse)	Core matrisome	ECM Glycoproteins
Basement membrane protein	High	Q4FJX7	Tinagl1	Tubulointerstitial nephritis antigen-like 1	2	415	46.8	-	885553	421809	362092	-	Matrisome (Mouse)	Core matrisome	ECM Glycoproteins
Basement membrane protein	High	P02468	Lamc1	Laminin subunit gamma-1	1	1607	177.2	280906	738002	210689	287704	-	Matrisome (Mouse)	Core matrisome	ECM Glycoproteins
Basement membrane protein	High	Q3TR40	Thbs1	Thrombospondin 1	1	1170	129.5	83637.9	220724	-	55466.9	-	Matrisome (Mouse)	Core matrisome	ECM Glycoproteins
Basement membrane protein	High	Q9D2D1	Ctsa	Carboxypeptidase	1	474	53.8	117837	260521	95410.6	65779.7	-	Matrisome (Mouse)	Matrisome-associated	ECM Regulators
Basement membrane protein	High	Q3UCW4	Ctsd	Cathepsin D	1	410	44.9	569701	-	147077	125806	-	Matrisome (Mouse)	Matrisome-associated	ECM Regulators
Basement membrane protein	High	E9Q5Z7	Frem1	FRAS1-related extracellular matrix protein 1	1	2173	242.5	74820.4	135226	82651	64946.7		Matrisome (Mouse)	Matrisome-associated	ECM-affiliated Proteins
Basement membrane protein	High	Q6NVD0	Frem2	FRAS1-related extracellular matrix protein 2	1	3160	350.4	182642	312292	103471	159045	-	Matrisome (Mouse)	Matrisome-associated	ECM-affiliated Proteins
Basement membrane protein	High	B1B0C7	Hspg2	Basement membrane-specific heparan sulfate proteoglycan core protein	5	4375	468.7	8.54728e+06	1.62529e+07	5.94641e+06	7.40777e+06	-	Matrisome (Mouse)	Core matrisome	Proteoglycans
Basement membrane protein	High	Q6PIE1	Smc3	SMC3 protein	3	831	96.2	192865	297000	174634	142611	-	BM_list	-	-
Other structural protein	High	P11087-1	Col1a1	Collagen alpha-1(I) chain	17	1453	137.9	3.17735e+06	6.97598e+06	2.03989e+07	1.56443e+06	Oxidation [P392; P398; P401; P416; P470; P472; P473; P485; P503; K509; P512; P518; P524; P533; P536; P544; P545; P547; P554; P556; P559; P560; P572; P574; K575; P680; P761; P763; P767; P775; P859; P860; P866; P908; P913; P914; P916; P953; P985; P986; P988; P991; P998; P1034; P1037; P1040; K1051]	Matrisome (Mouse)	Core matrisome	Collagens
Other structural protein	High	Q01149	Col1a2	Collagen alpha-2(I) chain	9	1372	129.5	584872	1.12659e+06	850847	82059.2	Oxidation [P116; P122; P126; P129; P234; P321; P327; P330; P332; P336; P338; P390; P398; P402; P459; P462; P600; P684; P690; P692; P957; P971; K980]	Matrisome (Mouse)	Core matrisome	Collagens
Other structural protein	High	Q8K0E8	Fgb	Fibrinogen beta chain	7	481	54.7	5.73181e+06	1.04812e+07	2.62091e+06	3.27815e+06	-	Matrisome (Mouse)	Core matrisome	ECM Glycoproteins
Other structural protein	High	E9PV24	Fga	Fibrinogen alpha chain	6	789	87.4	4.75375e+06	8.68049e+06	1.80046e+06	2.58233e+06	-	Matrisome (Mouse)	Core matrisome	ECM Glycoproteins
Other structural protein	High	Q8VCM7	Fgg	Fibrinogen gamma chain	5	436	49.4	4.81035e+06	8.94897e+06	1.82589e+06	2.24654e+06	Oxidation [P101; K110]	Matrisome (Mouse)	Core matrisome	ECM Glycoproteins
Other structural protein	High	Q99PM0	Mfap2	Microfibril-associated glycoprotein 1	1	185	20.8	246694	307383	-	142289	-	Matrisome (Mouse)	Core matrisome	ECM Glycoproteins
ECM-associated protein	High	Q4FK88	Anxa1	Annexin A1	11	346	38.7	1.23994e+07	1.12643e+07	4.25836e+06	1.5455e+07	-	Matrisome (Mouse)	Matrisome-associated	ECM-affiliated Proteins
ECM-associated protein	High	Q7TMN7	Anxa4	Annexin A4	2	319	35.9	162362	740513	323966	147409	-	Matrisome (Mouse)	Matrisome-associated	ECM-affiliated Proteins
ECM-associated protein	High	P48036	Anxa5	Annexin A5	7	319	35.7	1.13413e+07	1.522e+07	9.89628e+06	6.15479e+06	Oxidation [K84]	Matrisome (Mouse)	Matrisome-associated	ECM-affiliated Proteins
ECM-associated protein	High	Q99JX6	Anxa6	Annexin A6	18	667	75.2	9.60703e+06	3.23771e+07	1.15101e+07	1.05833e+07	-	Matrisome (Mouse)	Matrisome-associated	ECM-affiliated Proteins
ECM-associated protein	High	Q922A2	Anxa7	Annexin A7	1	463	49.9	354656	116585	-	269621	-	Matrisome (Mouse)	Matrisome-associated	ECM-affiliated Proteins
ECM-associated protein	High	Q8VHY0	Cspg4	Chondroitin sulfate proteoglycan 4	3	2327	252.2	312282	659227	300245	247086	-	Matrisome (Mouse)	Matrisome-associated	ECM-affiliated Proteins
ECM-associated protein	High	G3X9T7	Lgals9	Galectin	1	353	40	114248	268225	-	67963.2	-	Matrisome (Mouse)	Matrisome-associated	ECM-affiliated Proteins
ECM-associated protein	High	Q9CZI7	Anxa2	Annexin A2	15	339	38.6	5.61276e+07	5.05325e+07	2.77821e+07	3.7383e+07	-	Matrisome (Mouse)	Matrisome-associated	ECM-affiliated Proteins
ECM-associated protein	High	Q6GQT1	A2m	Alpha-2-macroglobulin-P	3	1474	164.2	1.16187e+06	2.83117e+06	108514	950946	-	Matrisome (Mouse)	Matrisome-associated	ECM Regulators
ECM-associated protein	High	Q07456	Ambp	Protein AMBP	3	349	39	282512	980652	651754	217596	-	Matrisome (Mouse)	Matrisome-associated	ECM Regulators
ECM-associated protein	High	Q7M754	Try10; Gm5409	Try10-like trypsinogen	1	246	26.5	1.20849e+07	1.56704e+07	1.30642e+07	7.87813e+06	-	Matrisome (Mouse)	Matrisome-associated	ECM Regulators
ECM-associated protein	High	Q61703	Itih2	Inter-alpha-trypsin inhibitor heavy chain H2	1	946	105.9	797025	1.13979e+06	707634	497527	-	Matrisome (Mouse)	Matrisome-associated	ECM Regulators
ECM-associated protein	High	O08677-1	Kng1	kininogen-1	2	661	73.1	2.53522e+06	1.06569e+06	148134	353191	-	Matrisome (Mouse)	Matrisome-associated	ECM Regulators
ECM-associated protein	High	P07146	Prss2	Anionic trypsin-2	1	246	26.2	4.27879e+06	2.30665e+06	3.24725e+06	2.34222e+06	Oxidation [P97]	Matrisome (Mouse)	Matrisome-associated	ECM Regulators
ECM-associated protein	High	Q61838	Pzp	Pregnancy zone protein	1	1495	165.7	-	490849	266102	314604	-	Matrisome (Mouse)	Matrisome-associated	ECM Regulators
ECM-associated protein	High	P07758	Serpina1a; Serpina1d	Alpha-1-antitrypsin 1-1	2	413	46	1.36365e+06	3.4135e+06	1.04648e+06	1.02969e+06		Matrisome (Mouse)	Matrisome-associated	ECM Regulators
ECM-associated protein	High	Q8K1K6	Serpinb10	Serpin B10	1	397	45.1	3.46605e+06	119805	415707	494044	-	Matrisome (Mouse)	Matrisome-associated	ECM Regulators
ECM-associated protein	High	Q6UKZ0	Serpinb3d	mCG8992	2	387	44.7	1.95811e+07	453764	1.12299e+06	1.98498e+06	-	Matrisome (Mouse)	Matrisome-associated	ECM Regulators
ECM-associated protein	Medium	F8WIV2	Serpinb6a	Serine (or cysteine) peptidase inhibitor, clade B, member 6a	1	399	44.7	189568	272910	69820.5	135750	-	Matrisome (Mouse)	Matrisome-associated	ECM Regulators
ECM-associated protein	High	Q3TJK3	Serpinh1	Serine (or cysteine) peptidase inhibitor, clade H, member 1	11	417	46.5	1.34388e+07	3.36735e+07	1.19426e+07	1.4195e+07	Oxidation [P29]	Matrisome (Mouse)	Matrisome-associated	ECM Regulators
ECM-associated protein	High	Q9JLF6	Tgm1	Protein-glutamine gamma-glutamyltransferase K	4	815	89.8	4.02428e+06	540359	3.73425e+06	2.13556e+06	-	Matrisome (Mouse)	Matrisome-associated	ECM Regulators
ECM-associated protein	High	Q08189	Tgm3	Protein-glutamine gamma-glutamyltransferase E	3	693	77.3	2.18099e+06	940843	1.89383e+06	3.99054e+06	Oxidation [P579]	Matrisome (Mouse)	Matrisome-associated	ECM Regulators
ECM-associated protein	High	Q61191	Hcfc1	Host cell factor 1	1	2045	210.3	89006.1	294839	122286	110141	-	Matrisome (Mouse)	Matrisome-associated	Secreted Factors
ECM-associated protein	High	P50543	S100a11	Protein S100-A11	1	98	11.1	2.38681e+06	317123	479447	-	-	Matrisome (Mouse)	Matrisome-associated	Secreted Factors
ECM-associated protein	High	Q9D708	S100a16	Protein S100-A16	1	124	14.3	620646	84567.6	179646	409613	-	Matrisome (Mouse)	Matrisome-associated	Secreted Factors
