# Supplementary material for: Kidney organoids recapitulate human basement membrane assembly in health and disease
Source: eLife. 2022 Jan 25;11:e73486. doi: 10.7554/eLife.73486 (PMC8849328; doi:10.7554/eLife.73486)
Supplement: Supplementary file 5. [file elife-73486-supp5.xlsx]

## Sheet: Cellular fraction (all)
Protein FDR Confidence: Combined	Master	Accession	Description	Exp. q-value: Combined	Sum PEP Score	Coverage [%]	# Peptides	# PSMs	# Unique Peptides	# AAs	MW [kDa]	calc. pI	Score Mascot: Mascot	Score Sequest HT: Sequest HT	# Peptides (by Search Engine): Mascot	# Peptides (by Search Engine): Sequest HT	Pfam IDs	Entrez Gene ID	Ensembl Gene ID	Gene Symbol	Abundances (Normalized): F1: Control, Control	Abundances (Normalized): F2: Control, Control	Abundances (Normalized): F3: Control, Control	Abundances (Normalized): F4: Control, Control	Abundances (Normalized): F5: Control, Control	Abundances (Normalized): F6: Control, Control	Abundance: F1: Control, Control	Abundance: F2: Control, Control	Abundance: F3: Control, Control	Abundance: F4: Control, Control	Abundance: F5: Control, Control	Abundance: F6: Control, Control	# Protein Groups	Modifications
High	Master Protein	A0A023J5X8	NADH-ubiquinone oxidoreductase chain 2 [OS=Mus musculus musculus]	0	30.401	5	1	55	1	345	38.8	9.92	1059	74.94	1	1	Pf00361, Pf06444				1.72813e+06	2.42787e+06	1.73058e+06	2.14732e+06	2.83578e+06	2.36273e+06	1.51658e+06	2.35346e+06	740420	1.31291e+06	1.5336e+06	1.6663e+06	1
High	Master Protein	A0A023J654	NADH-ubiquinone oxidoreductase chain 4 [OS=Mus musculus musculus]	0	7.09	2	1	24	1	459	51.8	9.38	185	30.53	1	1	Pf00361, Pf01059				3.63488e+06	3.93157e+06	3.83912e+06	4.89711e+06	5.33062e+06	4.27563e+06	3.18989e+06	3.81107e+06	1.64254e+06	2994181	2882823	3.01535e+06	1
High	Master Protein	A0A023J6D3	Cytochrome c oxidase subunit 3 [OS=Mus musculus musculus]	0	37.338	5	1	68	1	261	29.8	7.3	474	128.01	1	1	Pf00510				3.76298e+07	4.84593e+07	3.49237e+07	4.57531e+07	4.87999e+07	3.99633e+07	3.30231e+07	4.69741e+07	1.49419e+07	2.79743e+07	2.63912e+07	2.81837e+07	1
High	Master Protein	A0A024QYR9	Mitochondrial PTENalpha [OS=Mus musculus]	0	4.888	3	2	6	2	572	64.5	7.97	18	1.85	2	1	Pf00102, Pf00782, Pf10409	19211		Pten	598536	695548	144027	701478	318304	643677	525263	674230	61621.3	428896	172140	453947	1
High	Master Protein	A0A067XKP8	Cytochrome c oxidase subunit 1 [OS=Mus musculus domesticus]	0	114.118	14	4	161	4	514	56.9	6.7	1222	368.47	4	4	Pf00115				5.16395e+07	7.92731e+07	4.65909e+07	7.64311e+07	7.09671e+07	7.57594e+07	4.53177e+07	7.68435e+07	1.99336e+07	46731318	3.83793e+07	5.34286e+07	1
High	Master Protein	A0A068BGR9	NADH dehydrogenase [OS=Mus musculus]	0	25.714	35	4	90	4	113	12.6	10.17	679	95.9	4	4	Pf07347	66416		Ndufa7	4.90022e+06	5.96627e+06	4.44785e+06	6.01064e+06	7.65355e+06	7.76895e+06	4.30033e+06	5.78341e+06	1902988	3.67501e+06	4.13908e+06	5.47898e+06	1	Oxidation [P100; K102]
High	Master Protein	A0A075B5S9	immunoglobulin heavy variable 9-4 [OS=Mus musculus]	0	5.366	11	1	2	1	98	10.9	9.07	36	1.83	1	1	Pf00047, Pf07686		ENSMUSG00000094322.2		288029	286191	341525	377980	237888	109514	252768	277420	146120	231104	128651	77233.7	1
High	Master Protein	A0A075DCW1	NADH-ubiquinone oxidoreductase chain 3 [OS=Mus musculus]	0	15.2	13	1	42	1	115	13.1	4.64	974	47.81	1	1	Pf00507				1.11579e+06	1.73383e+06	1.19039e+06	1.57348e+06	1.77166e+06	2.30546e+06	979191	1.68069e+06	509300	962056	958121	1625902	1
Medium	Master Protein	A0A087WNR3	glutathione hydrolase 5 proenzyme [OS=Mus musculus]	0.042	0.933	21	1	5	1	71	7	8.56	0		1				ENSMUSG00000006344.17		936509	1.83259e+06	780499	1.5053e+06	2.39815e+06	3.33624e+06	821861	1.77642e+06	333932	920367	1.29693e+06	2.35285e+06	1	Oxidation [K51]
High	Master Protein	A0A087WNV1	Arf-GAP domain and FG repeat-containing protein 1 [OS=Mus musculus]	0	14.996	7	2	6	2	521	53.9	8.92	52	5.3	2	2	Pf01412	15463	ENSMUSG00000026159.13	Agfg1	340407	144574	492946	508435	138081	965565	298734	140143	210904	310866	74675.1	680956	1
High	Master Protein	A0A087WNZ7	E3 ubiquitin-protein ligase TRIP12 [OS=Mus musculus]	0	98.706	8	11	107	11	1992	220.5	8.44	884	107.51	11	11	Pf00632, Pf02825		ENSMUSG00000026219.14		5.19087e+06	2.955e+06	4.83495e+06	5.27531e+06	5.45005e+06	5.41915e+06	4.5554e+06	2.86443e+06	2.0686e+06	3.22542e+06	2.94741e+06	3.8218e+06	1
High	Master Protein	A0A087WP55	C-type lectin domain family 18 member A [OS=Mus musculus]	0	9.048	3	1	8	1	425	46.8	7.69	51	7.06	1	1	Pf00059, Pf00188		ENSMUSG00000033633.14		128053	89749.5		201977	100172	295704	112376	86998.8		123492	54173.6	208543	1
High	Master Protein	A0A087WPF8	Protein ABHD14B [OS=Mus musculus]	0	59.49	33	3	54	3	174	18.4	6.79	662	87.87	3	3	Pf12146, Pf12695, Pf12697		ENSMUSG00000042073.15		3.1263e+06	4.82102e+06	2.47308e+06	3.20069e+06	4.06264e+06	6.17974e+06	2.74358e+06	4.67326e+06	1.05809e+06	1.95696e+06	2.19709e+06	4358206	1	Oxidation [P163]
High	Master Protein	A0A087WPL5	Atp-dependent rna helicase a [OS=Mus musculus]	0	1256.67	55	65	3911	1	1383	149.5	6.83	55841	6178.59	65	65	Pf00035, Pf00270, Pf00271, Pf04408, Pf07717	13211	ENSMUSG00000042699.11	Dhx9	1.22374e+09	9.54766e+08	1.29726e+09	1.25742e+09	1.0262e+09	1.04352e+09	1.07393e+09	9.25503e+08	5.55023e+08	7.68807e+08	5.54973e+08	7.35934e+08	1	Oxidation [P81; P87; P109; P793; K1039]
High	Master Protein	A0A087WPM0	Selenoprotein H [OS=Mus musculus]	0	37.875	36	3	64	3	123	13.5	9.45	510	78.41	3	3	Pf10262				2.84208e+06	4.01412e+06	3.78031e+06	4.03891e+06	3.94707e+06	5.04458e+06	2.49415e+06	3.89109e+06	1.61738e+06	2.46946e+06	2.13459e+06	3.55764e+06	1
High	Master Protein	A0A087WPT7	Phosphatidylinositol 3,4,5-trisphosphate 5-phosphatase 2 [OS=Mus musculus]	0	15.708	3	4	39	3	1166	128.9	7.44	84	15.45	4	4	Pf00017, Pf03372		ENSMUSG00000032737.13		1.41764e+06	1.54751e+06	1.508e+06	1.49853e+06	1.56148e+06	1.4515e+06	1.24409e+06	1.50008e+06	645189	916228	844458	1.02366e+06	1
High	Master Protein	A0A087WQ12	Serine/threonine-protein kinase 16 [OS=Mus musculus]	0	6.256	9	1	2	1	187	20.6	5.76	0	2.27	1	1	Pf00069, Pf07714		ENSMUSG00000026201.12		144918	174671	118599	168839	156581	152501	127177	169317	50741.7	103231	84679.6	107550	1
High	Master Protein	A0A087WQ94	Tensin 1 [OS=Mus musculus]	0	60.399	8	8	102	8	1719	183.3	7.49	875	89.05	8	8	Pf00017, Pf08416, Pf10409		ENSMUSG00000055322.15		3.15359e+06	4.30866e+06	3.25341e+06	4.41392e+06	4.61114e+06	4.31005e+06	2.76753e+06	4.17661e+06	1.39195e+06	2.69875e+06	2.49372e+06	3.03963e+06	1
Medium	Master Protein	A0A087WQK5	alpha-1,2-mannosidase [OS=Mus musculus]	0.011	1.894	1	1	4	1	917	102.5	5.01	14	0	1	1	Pf01532, Pf02225	66967	ENSMUSG00000043019.12	Edem3	617180	734661	717966	774608	772600	730204	541625	712144	307178	473609	417826	514970	1
High	Master Protein	A0A087WQS2	Basic leucine zipper and W2 domain-containing protein 1 [OS=Mus musculus]	0	154.912	33	19	469	17	451	51.2	6.95	3791	448.43	19	19	Pf02020	66882	ENSMUSG00000051223.14	Bzw1	6.32687e+07	6.511e+07	5.99091e+07	6.4265e+07	6.38719e+07	5.77996e+07	5.55233e+07	63114424	2.56318e+07	3.92928e+07	3.45422e+07	4.07626e+07	1
Medium	Master Protein	A0A087WQS9	Putative ATP-dependent RNA helicase TDRD12 [OS=Mus musculus]	0.021	1.558	1	1	1	1	1113	126	7.24	18		1		Pf00567		ENSMUSG00000030491.16		130782	144914	153968	195039	81961.1	234428	114772	140473	65874.3	119250	44325	165328	1
Medium	Master Protein	A0A087WQY5	Snf2-related CREBBP activator protein [OS=Mus musculus]	0.021	1.542	1	1	2	1	1192	132.4	4.98	0	0	1	1	Pf00176, Pf07529		ENSMUSG00000053877.12		206292	271975	321895	276010	288187	221637	181038	263639	137721	168757	155853	156308	1
Medium	Master Protein	A0A087WR13	dynein, axonemal, heavy chain 7C [OS=Mus musculus]	0.024	1.488	0	1	5	1	4024	461.8	6.16	0		1		Pf03028, Pf07728, Pf08393, Pf12774, Pf12775, Pf12777, Pf12780, Pf12781	100101919	ENSMUSG00000101337.6	Dnah7c; Dnahc7c	1.73353e+06	1.74036e+06	1.81172e+06	1.5199e+06	1.90739e+06	1.62402e+06	1.52131e+06	1.68702e+06	775134	929294	1.03152e+06	1145327	1
High	Master Protein	A0A087WRC2	Integrator complex subunit 5 [OS=Mus musculus]	0	9.536	14	1	2	1	99	11.5	12.06	48	2.37	1	1			ENSMUSG00000071652.6		235213	207337	321629	304383	205355	194975	206418	200982	137607	186105	111057	137505	1
High	Master Protein	A0A087WS16	Collagen, type VI, alpha 3 [OS=Mus musculus]	0	153.891	7	18	225	18	2677	288.5	8.53	1697	218.9	18	16	Pf00014, Pf00041, Pf00092, Pf01391, Pf13519, Pf13768		ENSMUSG00000048126.16		9.22219e+06	1.56026e+07	1.09175e+07	1.2333e+07	1.37447e+07	1.56841e+07	8.0932e+06	1.51244e+07	4.67097e+06	7.54063e+06	7.43318e+06	1.10611e+07	1
High	Master Protein	A0A087WS56	fibronectin [OS=Mus musculus]	0	908.294	39	60	1773	60	2266	249.4	5.82	23921	2700.65	58	60	Pf00039, Pf00040, Pf00041	14268	ENSMUSG00000026193.15	Fn1	1.70021e+08	2.0702e+08	1.80122e+08	1.84416e+08	2.21304e+08	1.54411e+08	1.49207e+08	2.00675e+08	7.7064e+07	1.12755e+08	1.19682e+08	1.08897e+08	1	Oxidation [P462; K1543; P1544]
High	Master Protein	A0A0A0MQ68	Glutaryl-CoA dehydrogenase, mitochondrial [OS=Mus musculus]	0	80.428	24	6	99	6	447	49.5	8.72	1117	129.1	6	6	Pf00441, Pf02770, Pf02771, Pf08028	270076	ENSMUSG00000003809.14	Gcdh	6.52361e+06	8.5283e+06	6.89803e+06	7.55411e+06	8.86071e+06	1.13162e+07	5.72498e+06	8.26691e+06	2.95128e+06	4.61872e+06	4.79191e+06	7.98063e+06	1	Oxidation [P197]
High	Master Protein	A0A0A0MQ79	Protein Prrc2c [OS=Mus musculus]	0	12.799	1	2	21	2	2844	310.5	9.1	138	16.15	2	2	Pf07001	226562	ENSMUSG00000040225.15	Prrc2c	762435	465035	711939	685660	609162	583858	669097	450782	304599	419225	329438	411761	1
High	Master Protein	A0A0A0MQ89	actin-related protein 5 [OS=Mus musculus]	0	15.889	5	2	14	2	608	68.1	5.16	149	12.82	2	2	Pf00022	109275	ENSMUSG00000037761.16	Actr5	224064	203990	185484	215408	218472	200692	196634	197738	79358.3	131704	118151	141537	1
High	Master Protein	A0A0A0MQA5	tubulin alpha chain [OS=Mus musculus]	0	718.027	58	27	2538	6	477	52.9	5.19	41203	4491.43	27	27	Pf00091, Pf03953		ENSMUSG00000026202.13		1.50141e+08	1.28295e+08	1.63706e+08	1.13417e+08	1.38316e+08	1.54664e+08	1.3176e+08	1.24363e+08	7.00408e+07	6.93451e+07	7.48018e+07	1.09075e+08	1	Oxidation [P327; K333]
Medium	Master Protein	A0A0A0MQD5	SH3 and multiple ankyrin repeat domains protein 3 [OS=Mus musculus]	0.021	1.553	1	1	2	1	1805	192.1	8.9	0	0	1	1	Pf00018, Pf00023, Pf00536, Pf02198, Pf07647, Pf07653, Pf12796, Pf13637, Pf13857, Pf14604	58234	ENSMUSG00000022623.15	Shank3	311147	154614	401284	312577	294741	323844	273056	149875	171687	191115	159398	228388	1
High	Master Protein	A0A0A0MQM0	eukaryotic translation initiation factor 5A [OS=Mus musculus]	0	145.048	42	8	353	8	149	16.3	5	3274	544.53	8	8	Pf01287	276770	ENSMUSG00000078812.10	Eif5a	6.97257e+07	6.30085e+07	6.66563e+07	6.68557e+07	6.29483e+07	5.51335e+07	6.11898e+07	6.10773e+07	2.85185e+07	4.08768e+07	3.40427e+07	3.88824e+07	1	Oxidation [P74]
High	Master Protein	A0A0A0MQM2	Phosphoinositide phospholipase C [OS=Mus musculus]	0	4.55	1	1	55	1	1073	122.5	7.72	249	30.84	1	1	Pf00036, Pf00168, Pf00387, Pf00388, Pf09279, Pf13499, Pf14788		ENSMUSG00000036834.16		1.68826e+06	2.36667e+06	1.97838e+06	2.18217e+06	2.02678e+06	2.06213e+06	1.48158e+06	2.29413e+06	846440	1.33422e+06	1.09609e+06	1.4543e+06	1
High	Master Protein	A0A0A0VBV0	cytochrome b [OS=Mus musculus domesticus]	0	4.368	3	1	4	1	316	35.7	7.31	55	4.8	1	1	Pf00032, Pf00033, Pf13631				6.02455e+06	7.18263e+06	8.98819e+06	9.38211e+06	9.77666e+06	9.95867e+06	5287017	6962488	3.84554e+06	5736392	5.28726e+06	7.02326e+06	1
High	Master Protein	A0A0A1HAM8	80K protein [OS=Mus musculus]	0	33.996	24	4	56	4	309	29.7	4.34	236	31.64	4	4		17118		Marcks	7.89218e+06	4.5571e+06	8.64537e+06	7.11239e+06	7.81206e+06	4.8397e+06	6.92602e+06	4.41742e+06	3.69887e+06	4.34864e+06	4.2248e+06	3.41316e+06	1
High	Master Protein	A0A0A6YVS2	Calcium load-activated calcium channel [OS=Mus musculus]	0	26.288	19	3	52	3	200	22.4	10.01	486	48.19	3	3	Pf01956		ENSMUSG00000052428.10		5.25845e+06	6.40206e+06	5.16563e+06	6.35057e+06	5.67011e+06	7.56751e+06	4614711	6.20584e+06	2.21008e+06	3882853	3.06642e+06	5.33692e+06	1
High	Master Protein	A0A0A6YW53	Mitogen-activated protein kinase kinase kinase kinase 4 [OS=Mus musculus]	0	23.436	4	4	51	4	1288	146.6	7.49	225	35.55	4	4	Pf00069, Pf00780, Pf07714	26921	ENSMUSG00000026074.14	Map4k4	1.35576e+06	1.6536e+06	1.55674e+06	1.86008e+06	1.53927e+06	1.57308e+06	1.18978e+06	1.60292e+06	666043	1.13729e+06	832446	1.1094e+06	1
High	Master Protein	A0A0A6YWB0	Muscleblind-like protein 1 [OS=Mus musculus]	0	25.597	12	3	66	3	347	37.8	8.75	581	62.59	3	3		56758	ENSMUSG00000027763.13	Mbnl1	3.42716e+06	3.9476e+06	3.43995e+06	4.40589e+06	4.00145e+06	3.85904e+06	3.0076e+06	3.82661e+06	1.47176e+06	2.69384e+06	2.164e+06	2.72156e+06	1
High	Master Protein	A0A0A6YWH2	allograft inflammatory factor 1-like [OS=Mus musculus]	0	15.869	18	2	34	2	136	15.3	9.17	310	29.8	2	2	Pf06160		ENSMUSG00000001864.13		949687	895243	700966	1.04491e+06	1.32516e+06	1.26016e+06	833425	867804	299904	638877	716654	888718	1
High	Master Protein	A0A0A6YWM5	Rab3 GTPase-activating protein non-catalytic subunit [OS=Mus musculus]	0	7.545	2	3	10	3	1367	152.4	6.18	71	7.23	3	3	Pf14655, Pf14656	98732	ENSMUSG00000039318.12	Rab3gap2	1.34098e+06	1.81837e+06	1.51702e+06	1.50415e+06	1.58398e+06	1.5602e+06	1.17682e+06	1.76264e+06	649048	919662	856621	1.10031e+06	1
High	Master Protein	A0A0A6YWN9	Ubiquitin carboxyl-terminal hydrolase 19 [OS=Mus musculus]	0	44.482	11	6	32	6	991	110.5	6.67	165	9.85	6	6	Pf00443, Pf01753, Pf04969, Pf13423, Pf14533		ENSMUSG00000006676.16		1.42503e+06	1.63192e+06	1.51231e+06	1.45819e+06	1.40326e+06	1.688e+06	1.25058e+06	1.5819e+06	647031	891562	758892	1.19045e+06	1
High	Master Protein	A0A0A6YX50	protoporphyrinogen oxidase [OS=Mus musculus]	0	7.235	3	1	2	1	389	41.2	8.84	29	2.37	1	1	Pf01266, Pf01593, Pf13450		ENSMUSG00000062729.11		315729	319179	278054		349566	400724	277077	309396	118964		189047	282607	1
High	Master Protein	A0A0A6YX73	cAMP-dependent protein kinase type II-alpha regulatory subunit [OS=Mus musculus]	0	47.976	18	4	50	3	380	43.1	4.93	898	75.04	4	4	Pf00027, Pf02197		ENSMUSG00000032601.13		3.37168e+06	3.91809e+06	3.33284e+06	3.51092e+06	3.16381e+06	3.87124e+06	2.95892e+06	3.79801e+06	1.42593e+06	2.14664e+06	1.71101e+06	2.73016e+06	1
High	Master Protein	A0A0A6YXX8	Myelin protein zero-like protein 1 [OS=Mus musculus]	0.002	3.15	12	1	3	1	82	9.4	8.22	0	0	1	1	Pf07686		ENSMUSG00000026566.15		292578	300710	388177	228201	154287	284575	256760	291493	166079	139526	83438.9	200694	1
High	Master Protein	A0A0A6YXY1	N-terminal Xaa-Pro-Lys N-methyltransferase 1 [OS=Mus musculus]	0	21.071	25	2	20	2	118	13.3	8.7	448	23.34	2	2	Pf04444, Pf05891		ENSMUSG00000026857.9		196992	347246	245376	286672	267118	292713	172876	336603	104983	175276	144459	206433	1
High	Master Protein	A0A0A6YY47	Neural cell adhesion molecule 1 [OS=Mus musculus]	0	281.146	25	14	406	14	848	93.4	4.91	6084	611	14	14	Pf00041, Pf00047, Pf07654, Pf07679, Pf08205, Pf13895, Pf13927	17967	ENSMUSG00000039542.16	Ncam1	4.17101e+07	4.80423e+07	4.96636e+07	4.73984e+07	5.55622e+07	4.1595e+07	3.66039e+07	4.65698e+07	2.12483e+07	2.89803e+07	3.00483e+07	2.93345e+07	1
High	Master Protein	A0A0B4J1E2	SNW domain-containing protein 1 [OS=Mus musculus]	0	127.261	28	10	128	10	536	61.4	9.48	1231	162.95	10	10	Pf02731	66354	ENSMUSG00000021039.8	Snw1	1.20772e+07	1.16925e+07	1.24866e+07	1.57771e+07	1.11153e+07	1.32499e+07	1.05987e+07	1.13341e+07	5.34231e+06	9.6464e+06	6.01123e+06	9.34436e+06	1	Oxidation [K204]
High	Master Protein	A0A0F7QZE4	mAb 110 heavy chain [OS=Mus musculus]	0	97.299	24	8	190	2	472	51.7	7.53	2061	266.14	8	8	Pf07654, Pf07686, Pf08205				1.35955e+07	1.03974e+07	1.56501e+07	1.49111e+07	1.08937e+07	1.51663e+07	1.19311e+07	1.00788e+07	6.69582e+06	9.11691e+06	5.89136e+06	1.06959e+07	1
High	Master Protein	A0A0G2JDF7	ubiquitin carboxyl-terminal hydrolase 30 [OS=Mus musculus]	0.009	2.072	7	1	2	1	410	46	8.37	0	0	1	1	Pf00443, Pf13423		ENSMUSG00000029592.11		1.71826e+06	1.74537e+06	1.45018e+06	3.77731e+06	4.17465e+06	3.03408e+06	1507907	1.69188e+06	620452	2.30952e+06	2.25767e+06	2.13976e+06	1
High	Master Protein	A0A0G2JDV6	ubiquitin associated protein 2-like, isoform CRA_g [OS=Mus musculus]	0	42.955	5	5	40	5	1067	112.4	6.6	399	51.52	5	5	Pf00627, Pf12478, Pf14555	74383	ENSMUSG00000042520.16	Ubap2l	4.03874e+06	1.86168e+06	5.45271e+06	3.21686e+06	2.29708e+06	2.38624e+06	3.54432e+06	1.80462e+06	2.33291e+06	1.96684e+06	1.24227e+06	1.68287e+06	1
Medium	Master Protein	A0A0G2JF07	Complement factor I [OS=Mus musculus]	0.039	1.068	6	1	3	1	145	16.4	8.35	0	0	1	1	Pf07648		ENSMUSG00000058952.12			208149	321508	322536	349687	280036		201770	137555	197204	189112	197493	1
High	Master Protein	A0A0G2JF84	Paired immunoglobulin-like type 2 receptor beta-2 [OS=Mus musculus]	0.004	2.592	8	1	7	1	224	25.4	9.52	0		1				ENSMUSG00000066682.11		103922	193709	1.39581e+06	249986		238197	91199.9	187772	597191	152846		167986	1	Oxidation [P187]
High	Master Protein	A0A0G2JFJ6	Integrator complex subunit 3 [OS=Mus musculus]	0	152.315	22	16	151	16	1035	117.2	5.83	636	164.45	15	15	Pf10189		ENSMUSG00000027933.11		1.17632e+07	1.09451e+07	1.13728e+07	1.54097e+07	1.15822e+07	1.21552e+07	1.03232e+07	1.06097e+07	4.86581e+06	9.42174e+06	6.26373e+06	8.57233e+06	1
High	Master Protein	A0A0G2JFP4	Ferric-chelate reductase 1 [OS=Mus musculus]	0	16.895	4	2	3	2	592	66	8.32	40	3.2	2	1	Pf02014, Pf03351	20321	ENSMUSG00000033386.10	Frrs1	1.55971e+06	2.14995e+06	1.31539e+06	1.40301e+06	1.61318e+06	1.98266e+06	1.36877e+06	2.08406e+06	562783	857828	872412	1.39825e+06	1
High	Master Protein	A0A0G2JFX7	RNA-binding protein 8A [OS=Mus musculus]	0	43.041	22	3	91	3	171	19.1	4.97	1254	147.42	3	3	Pf00076, Pf08777, Pf13893, Pf14259		ENSMUSG00000038374.10		1.18277e+07	9.129e+06	1.22133e+07	1.76309e+07	1.55915e+07	1.68598e+07	1.03797e+07	8.8492e+06	5.22541e+06	10779860	8.43196e+06	1.18902e+07	1
High	Master Protein	A0A0G2JGL8	Putative ATP-dependent RNA helicase DHX30 [OS=Mus musculus]	0	40.67	6	7	100	7	1186	132.9	8.59	780	103.17	7	7	Pf00270, Pf00271, Pf04408, Pf07717	72831	ENSMUSG00000032480.17	Dhx30	4.25356e+06	4.5757e+06	5.73046e+06	5.38443e+06	5.32047e+06	4.77741e+06	3.73284e+06	4.43545e+06	2.45175e+06	3.29214e+06	2.87733e+06	3.36922e+06	1
High	Master Protein	A0A0G2JGQ5	Pre-mRNA-splicing factor ATP-dependent RNA helicase DHX15 [OS=Mus musculus]	0	145.704	59	9	251	1	186	21.2	4.86	2767	285.48	9	9			ENSMUSG00000029169.11		605715	642568	743231	628953		634865	531563	622874	317987	384553		447733	1
High	Master Protein	A0A0G2JGW9	Far upstream element-binding protein 1 [OS=Mus musculus]	0	250.249	42	22	561	17	643	67.5	7.61	6856	661.76	21	21	Pf00013, Pf07650, Pf13014	51886	ENSMUSG00000028034.15	Fubp1	4.90226e+07	3.62559e+07	4.52789e+07	4.93124e+07	4.35215e+07	3.51787e+07	4.30212e+07	3.51446e+07	1.93723e+07	3.01505e+07	2.35366e+07	2.48094e+07	1
High	Master Protein	A0A0H2UH25	vang-like protein 1 [OS=Mus musculus]	0.005	2.449	3	1	2	1	393	44.2	7.44	0	1.68	1	1	Pf06638	229658	ENSMUSG00000027860.15	Vangl1	130437	212154	202842	300006	273648	245391	114469	205652	86785	183429	147990	173060	1
High	Master Protein	A0A0J9YU62	C-terminal-binding protein 1 [OS=Mus musculus]	0	89.576	27	9	254	6	429	46.5	6.65	2747	372.24	9	9	Pf00389, Pf02826	13016	ENSMUSG00000037373.12	Ctbp1	1.47414e+07	1.10945e+07	9.03993e+06	1.67685e+07	1.02548e+07	1.14512e+07	1.29368e+07	1.07545e+07	3.86768e+06	1.02526e+07	5.54582e+06	8.07583e+06	1
Medium	Master Protein	A0A0J9YU92	F-box only protein 21 [OS=Mus musculus]	0.042	0.933	2	1	3	1	504	59.1	6.23	0	0	1	1	Pf08755, Pf13369		ENSMUSG00000032898.9		166025	173635	175836	311329	209686	163020	145700	168313	75230.2	190352	113399	114968	1
High	Master Protein	A0A0J9YUB6	OCIA domain-containing protein 1 [OS=Mus musculus]	0	25.976	26	3	58	3	178	19.6	9.1	477	69.5	3	3	Pf07051		ENSMUSG00000029152.13		1.92912e+06	1.82778e+06	1.90167e+06	2.30267e+06	2.11104e+06	2.42271e+06	1.69295e+06	1.77176e+06	813619	1.4079e+06	1.14166e+06	1.70859e+06	1
High	Master Protein	A0A0J9YV30	Paxillin [OS=Mus musculus]	0	7.243	5	2	5	2	424	46.5	6.95	0	5.55	1	2	Pf00412, Pf03535		ENSMUSG00000029528.18		2.80842e+07	7.39539e+06	1.48773e+07	1.33225e+07	1.04981e+07	6.66147e+06	2.46461e+07	7.16873e+06	6.36516e+06	8.14564e+06	5.67741e+06	4.69794e+06	1
High	Master Protein	A0A0M4KPD8	B2 12-1 anti-human butyrylcholinesterase (BChE) light chain variable region [OS=Mus musculus]	0	5.916	11	1	10	1	107	11.6	7.39	81	8.15	1	1	Pf00047, Pf07679, Pf07686, Pf13927				358916	220152	322218	306967	266370	269767	314977	213404	137859	187685	144054	190251	1
High	Master Protein	A0A0N4SUH4	Pumilio homolog 3 [OS=Mus musculus]	0	127.098	28	17	141	17	648	72.9	9.66	979	127.77	17	17	Pf05762, Pf08144	52874	ENSMUSG00000041360.7	D19Bwg1357e; Pum3	1.46134e+07	1.17724e+07	1.42818e+07	1.41854e+07	1.19671e+07	1.51582e+07	1.28244e+07	1.14116e+07	6.11039e+06	8.67322e+06	6.47186e+06	1.06902e+07	1
High	Master Protein	A0A0N4SUU0	Pleckstrin homology domain-containing, family A member 5 [OS=Mus musculus]	0	18.277	4	3	10	3	956	108.5	8.84	110	8.7	3	3	Pf00169, Pf04111, Pf15413		ENSMUSG00000030231.11		855304	852570	790750	1.00227e+06	900976	1.03275e+06	750597	826440	338318	612804	487252	728336	1
High	Master Protein	A0A0N4SUY1	Transmembrane protein 176B [OS=Mus musculus]	0	16.73	12	2	7	2	194	20.9	8.13	36	8.3	2	2	Pf04103		ENSMUSG00000029810.15		748458	974203	625203	694979	948368	1.4019e+06	656831	944344	267490	424923	512882	988680	1
High	Master Protein	A0A0N4SV40	Plasminogen activator inhibitor 1 RNA-binding protein [OS=Mus musculus]	0	31.814	25	4	57	1	186	20.6	10.73	577	73.72	4	3	Pf04774		ENSMUSG00000036371.6		267465	233482	347351	249209	307963	340559	234722	226326	148612	152371	166548	240176	1
High	Master Protein	A0A0N4SV80	Zinc finger protein 638 [OS=Mus musculus]	0	61.649	4	7	73	7	1926	214.3	6.76	620	50.92	7	7	Pf12171, Pf13893, Pf14259	18139	ENSMUSG00000030016.14	Zfml; Zfp638	2.37979e+06	2.62786e+06	2.90622e+06	3.50536e+06	1.77625e+06	3.25575e+06	2.08846e+06	2.54731e+06	1.24341e+06	2.14324e+06	960603	2.29609e+06	1
High	Master Protein	A0A0N4SVF7	Roquin-2 [OS=Mus musculus]	0.002	3.053	3	1	2	1	478	53.8	8.47	0	0	1	1	Pf00642, Pf13445, Pf13639, Pf13923, Pf14634, Pf15227		ENSMUSG00000075376.10		155920	196910	132691	142818	154210	223605	136832	190875	56771.2	87321.8	83397.7	157696	1
High	Master Protein	A0A0N4SVT1	Probable ATP-dependent RNA helicase DDX47 [OS=Mus musculus]	0	35.586	13	4	40	4	380	42.3	8.19	590	47.06	3	4	Pf00270, Pf00271		ENSMUSG00000030204.10		2.69862e+06	2.99442e+06	2.97986e+06	3.63737e+06	3.00971e+06	2.93507e+06	2.36825e+06	2.90265e+06	1.27491e+06	2.22395e+06	1.62767e+06	2069930	1
High	Master Protein	A0A0N4SVU8	transmembrane protein 176A [OS=Mus musculus]	0	5.943	4	1	16	1	230	25.1	8.02	25	11.31	1	1	Pf04103		ENSMUSG00000023367.14		294111	510858	438722	466542	625365	760931	258106	495200	187705	285252	338200	536640	1
High	Master Protein	A0A0N4SW28	Guanine nucleotide-binding protein subunit gamma [OS=Mus musculus]	0	75.602	58	4	71	4	83	9.2	9.25	490	81.62	4	4	Pf00631		ENSMUSG00000036402.13		1.69874e+07	1.21021e+07	1.30314e+07	1.2989e+07	1.60379e+07	1.98839e+07	1.49078e+07	1.17312e+07	5.57542e+06	7.9417e+06	8.67339e+06	1.4023e+07	1
High	Master Protein	A0A0N4SWH3	dysferlin [OS=Mus musculus]	0	86.247	6	9	84	8	2103	239.1	5.6	727	103.18	9	9	Pf00168, Pf06398, Pf08150, Pf08151, Pf08165	26903	ENSMUSG00000033788.15	Dysf	4.64366e+06	6.00052e+06	4.91333e+06	5.30767e+06	5.87331e+06	4.18701e+06	4.07518e+06	5.81661e+06	2.10214e+06	3.24521e+06	3.17631e+06	2.95286e+06	1
High	Master Protein	A0A0R3P9C8	NADH dehydrogenase [ubiquinone] 1 alpha subcomplex subunit 9, mitochondrial [OS=Mus musculus]	0	203.337	44	14	389	14	373	42.1	9.09	4813	573.01	13	14	Pf01073, Pf01370, Pf05368, Pf13460		ENSMUSG00000000399.10		9.75742e+07	9.93023e+07	8.02619e+07	8.83279e+07	9.3663e+07	8.20853e+07	8.56291e+07	9.62587e+07	3.43396e+07	5.40053e+07	5.06534e+07	5.78899e+07	1
High	Master Protein	A0A0R4IZW5	cadherin 1, isoform CRA_b [OS=Mus musculus]	0	46.291	8	7	57	7	884	98.2	4.84	245	37.81	7	7	Pf00028, Pf01049, Pf08758	12550	ENSMUSG00000000303.12	Cdh1	5.76794e+06	5.71148e+06	4.12133e+06	7.02737e+06	7.18991e+06	7.57578e+06	5.06183e+06	5.53643e+06	1.76329e+06	4.29666e+06	3.88834e+06	5.34275e+06	1
High	Master Protein	A0A0R4IZY0	thimet oligopeptidase [OS=Mus musculus]	0	98.025	21	12	169	12	687	78	5.99	2265	238.51	12	12	Pf01432	50492	ENSMUSG00000004929.12	Thop1	1.02155e+07	1.2611e+07	1.46464e+07	1.04401e+07	1.02065e+07	9.9736e+06	8.96494e+06	1.22245e+07	6.2664e+06	6.38325e+06	5.5197e+06	7.03379e+06	1
High	Master Protein	A0A0R4IZY2	Cytochrome P450 2D26 [OS=Mus musculus]	0	15.905	9	4	11	4	500	56.9	6.64	45	4.67	4	3	Pf00067	76279	ENSMUSG00000022445.6	Cyp2d26	3.51989e+06	4.1493e+06	4.70545e+06	4.10223e+06	4.95991e+06	4.71258e+06	3.08898e+06	4.02213e+06	2.0132e+06	2.50818e+06	2.68234e+06	3.3235e+06	1
High	Master Protein	A0A0R4IZY9	tRNA-dihydrouridine(47) synthase [NAD(P)(+)] [OS=Mus musculus]	0	44.61	14	6	79	6	637	71.1	7.9	867	108.72	6	6	Pf01207	224907	ENSMUSG00000007603.8	Dus3l	3.65698e+06	3.77517e+06	3.56427e+06	3.90526e+06	3.80826e+06	3.86926e+06	3.20929e+06	3.65946e+06	1.52495e+06	2.38774e+06	2.05953e+06	2.72876e+06	1
High	Master Protein	A0A0R4IZZ6	Formin-binding protein 4 [OS=Mus musculus]	0	7.322	2	2	12	2	1077	116.2	4.83	43	1.72	2	2	Pf00397	55935	ENSMUSG00000008200.14	Fnbp4	636074	322431	357357	860722	386608	299010	558206	312548	152893	526261	209079	210874	1
High	Master Protein	A0A0R4J008	histone deacetylase [OS=Mus musculus]	0	174.405	24	10	372	6	488	55.3	5.91	3884	480.79	10	10	Pf00850	15182	ENSMUSG00000019777.16	Hdac2	7.98414e+06	8.10553e+06	7.58963e+06	8.14785e+06	7.89459e+06	7.67606e+06	7.00671e+06	7.8571e+06	3.24718e+06	4.98174e+06	4.26943e+06	5.41347e+06	1	Oxidation [P348]
High	Master Protein	A0A0R4J009	Actin-related protein 6 [OS=Mus musculus]	0.001	3.373	2	1	2	1	396	45.8	5.03	32	1.85	1	1	Pf00022	67019	ENSMUSG00000019948.4	Actr6	276586	296683	302256	296438	370639	273996	242726	287590	129318	181248	200443	193233	1
High	Master Protein	A0A0R4J023	methylglutaconyl-CoA hydratase, mitochondrial [OS=Mus musculus]	0	35.023	21	5	46	5	314	33.3	9.42	316	35.2	5	5	Pf00378	11992	ENSMUSG00000021460.16	Auh	2.79557e+06	3.7099e+06	2.90034e+06	3.52314e+06	4.03728e+06	4.78591e+06	2.45334e+06	3.5962e+06	1.24089e+06	2154113	2.18338e+06	3.37522e+06	1
High	Master Protein	A0A0R4J034	mCG129810, isoform CRA_c [OS=Mus musculus]	0	53.304	10	6	59	6	789	87.4	5.67	482	55.77	6	6	Pf00282	94184	ENSMUSG00000022680.13	Pdxdc1	3.60685e+06	4.39133e+06	3.87116e+06	4.50962e+06	4.60953e+06	4.53366e+06	3.1653e+06	4.25674e+06	1.65625e+06	2.75726e+06	2.49285e+06	3.19732e+06	1
High	Master Protein	A0A0R4J039	Histidine-rich glycoprotein [OS=Mus musculus]	0.006	2.385	1	1	3	1	536	60.4	7.61	0	0	1	1		94175	ENSMUSG00000022877.8	Hrg	130056	330548	152968	145792	261583	152881	114134	320416	65446.6	89140.1	141465	107818	1
High	Master Protein	A0A0R4J050	Aminoacylase-1 [OS=Mus musculus]	0	47.81	15	7	69	7	408	45.8	6.21	637	60.58	7	7	Pf01546, Pf07687	109652	ENSMUSG00000023262.13	Acy1	7.90854e+06	9.84546e+06	5.94556e+06	7.80336e+06	8.20456e+06	1.13833e+07	6.94037e+06	9.5437e+06	2.54377e+06	4.77112e+06	4.43706e+06	8.02799e+06	1
High	Master Protein	A0A0R4J069	selenocysteine lyase [OS=Mus musculus]	0	44.408	12	4	61	4	432	47.2	6.67	369	62.39	4	4	Pf00266	50880	ENSMUSG00000026307.12	Scly	2.16884e+06	4.0491e+06	2.68978e+06	2.81397e+06	3.89753e+06	3.89086e+06	1.90333e+06	3.925e+06	1.15081e+06	1.72051e+06	2.1078e+06	2.74399e+06	1
High	Master Protein	A0A0R4J078	UBX domain containing 2, isoform CRA_a [OS=Mus musculus]	0	13.804	5	2	20	1	506	56.4	6.61	219	18.04	2	2	Pf00789	67812	ENSMUSG00000026353.9	Ubxn4	822030	1.0255e+06	1.16642e+06	667298	962147	656213	721397	994072	499046	407998	520334	462788	1
High	Master Protein	A0A0R4J083	Long-chain-specific acyl-CoA dehydrogenase, mitochondrial [OS=Mus musculus]	0	223.346	42	16	434	1	430	47.9	8.15	3370	503.76	16	16	Pf00441, Pf02770, Pf02771, Pf08028	11363	ENSMUSG00000026003.5	Acadl	4.41546e+07	4.47192e+07	3.18871e+07	3.95008e+07	4.14881e+07	4.08042e+07	3.87492e+07	4.33486e+07	1.36427e+07	2.41515e+07	2.24369e+07	2.87768e+07	1	Oxidation [K240; K419]
High	Master Protein	A0A0R4J086	Olfactomedin-like protein 3 [OS=Mus musculus]	0	10.034	4	1	6	1	406	45.8	6.37	115	5.18	1	1	Pf02191	99543	ENSMUSG00000027848.12	Olfml3	163873	133839	113218	203658	138121	165326	143812	129737	48439.8	124520	74696.4	116595	1
High	Master Protein	A0A0R4J091	DNA polymerase epsilon subunit 3 [OS=Mus musculus]	0.003	2.837	8	1	2	1	145	16.7	4.74	0	1.95	1	1	Pf00808	59001	ENSMUSG00000028394.9	Pole3	262757	263073	293464	285874	210872	159924	230590	255010	125557	174788	114040	112785	1
High	Master Protein	A0A0R4J092	Beta-mannosidase [OS=Mus musculus]	0	37.899	5	4	36	4	879	100.8	7.08	664	46.51	4	4	Pf02836, Pf02837	110173	ENSMUSG00000028164.15	Manba	2.54688e+06	3.01925e+06	2.41633e+06	3.00194e+06	2.97764e+06	3.10762e+06	2.23509e+06	2.92671e+06	1.03381e+06	1.83544e+06	1.61032e+06	2.19162e+06	1
High	Master Protein	A0A0R4J098	Zinc finger protein 326 [OS=Mus musculus]	0	98.319	25	10	171	10	580	65.1	5.21	1664	208.28	10	10	Pf04988	54367	ENSMUSG00000029290.12	Zfp326	8.91736e+06	8.88189e+06	8.89205e+06	1.06235e+07	9.34399e+06	9.88212e+06	7.82569e+06	8.60967e+06	3.80441e+06	6.4954e+06	5.05327e+06	6.96928e+06	1
High	Master Protein	A0A0R4J0B4	cytidine monophospho-N-acetylneuraminic acid synthetase [OS=Mus musculus]	0	59.356	17	6	82	6	432	48	8.1	877	86.09	6	6	Pf02348, Pf12804	12764	ENSMUSG00000030282.14	Cmas	4.00857e+06	3.64963e+06	4.40496e+06	4.60015e+06	3.69126e+06	5.23054e+06	3.51784e+06	3.53777e+06	1.88463e+06	2.81262e+06	1.99625e+06	3.68879e+06	1
High	Master Protein	A0A0R4J0B6	ATP-binding cassette sub-family G member 2 [OS=Mus musculus]	0	96.11	15	9	166	9	657	73	8.54	1464	177.82	9	9	Pf00005, Pf01061, Pf12698, Pf13304, Pf13476	26357	ENSMUSG00000029802.13	Abcg2	1.50638e+07	1.86698e+07	1.28194e+07	1.47837e+07	1.83746e+07	1.98569e+07	1.32197e+07	1.80976e+07	5.48471e+06	9.03902e+06	9.93708e+06	1.40039e+07	1
High	Master Protein	A0A0R4J0D3	Dolichyl-diphosphooligosaccharide--protein glycosyltransferase subunit STT3B [OS=Mus musculus]	0	52.494	9	8	263	7	823	93.3	9	1830	178.45	8	8	Pf02516, Pf13231	68292	ENSMUSG00000032437.10	Stt3b	1.18119e+07	1.13123e+07	1.11602e+07	1.16873e+07	1.17185e+07	1.06653e+07	1.03659e+07	1.09656e+07	4.77484e+06	7.14582e+06	6.33741e+06	7.52159e+06	1
High	Master Protein	A0A0R4J0E4	Integrator complex subunit 7 [OS=Mus musculus]	0	127.44	17	13	137	1	966	106.8	8.22	1212	153.97	13	13		77065	ENSMUSG00000037461.10	Ints7	8.0759e+06	7.59097e+06	9.38944e+06	8.5781e+06	7.51532e+06	7.64473e+06	7.08725e+06	7.35831e+06	4.01722e+06	5.2448e+06	4.06432e+06	5.39138e+06	1
High	Master Protein	A0A0R4J0G0	Phosphoenolpyruvate carboxykinase [GTP], mitochondrial [OS=Mus musculus]	0	94.41	19	10	146	1	667	73.4	7.74	1461	209.1	10	10	Pf00821	74551	ENSMUSG00000040618.6	Pck2	7.93557e+06	1.02178e+07	8.06345e+06	8.24338e+06	1.01931e+07	7.64187e+06	6.96409e+06	9.90463e+06	3.4499e+06	5.04015e+06	5.51249e+06	5.38936e+06	1
High	Master Protein	A0A0R4J0G4	Ran-binding protein 10 [OS=Mus musculus]	0	13.366	3	1	18	1	648	70	6.68	126	22.4	1	1	Pf00622, Pf08513, Pf10607	74334	ENSMUSG00000037415.6	Ranbp10	496539	655524	547252	632159	690423	723126	435753	635433	234139	386514	373384	509978	1
High	Master Protein	A0A0R4J0I9	low density lipoprotein receptor-related protein 1 [OS=Mus musculus]	0	231.391	8	29	289	29	4545	504.4	5.36	2606	296.18	29	28	Pf00057, Pf00058, Pf07645, Pf12662, Pf14670	16971	ENSMUSG00000040249.15	Lrp1	1.80767e+07	2.05198e+07	2.05412e+07	2.0791e+07	2.2526e+07	1.80395e+07	1.58637e+07	1.98908e+07	8.78841e+06	1.2712e+07	1.21821e+07	1.27222e+07	1	Oxidation [P333]
High	Master Protein	A0A0R4J0J8	Cytospin-A [OS=Mus musculus]	0	8.994	4	3	17	3	1135	126.5	5.94	16	3.95	3	3	Pf00038, Pf00307, Pf01576, Pf01920, Pf02463, Pf02932, Pf03251, Pf04111, Pf04156, Pf05667, Pf05701, Pf08317, Pf10186, Pf11971, Pf12128, Pf13166	74392	ENSMUSG00000033444.14	Specc1l	678564	1.02333e+06	1.00144e+06	1.0005e+06	504264	989228	595493	991969	428460	611725	272708	697644	1
High	Master Protein	A0A0R4J0L5	Conserved oligomeric Golgi complex subunit 6 [OS=Mus musculus]	0	9.868	5	3	14	3	657	73	6.14	46	6.41	3	3	Pf06419	67542	ENSMUSG00000027742.13	Cog6	692981	475585	769049	857064	885006	406534	608146	461008	329033	524024	478615	286704	1
High	Master Protein	A0A0R4J0Q5	Lamin-B2 [OS=Mus musculus]	0	287.772	50	27	617	18	615	69	5.55	6299	686.78	27	27	Pf00038, Pf00932, Pf04156	16907	ENSMUSG00000062075.13	Lmnb2	1.57934e+07	1.50285e+07	1.53147e+07	1.77675e+07	1.52049e+07	1.7328e+07	1.386e+07	1.45679e+07	6.55231e+06	1.08634e+07	8.2229e+06	1.22204e+07	1
High	Master Protein	A0A0R4J0Q6	E3 ubiquitin-protein ligase TRIM56 [OS=Mus musculus]	0	5.555	3	2	4	2	734	79.5	7.88	19	1.67	2	2	Pf00097, Pf00643, Pf13445, Pf13639, Pf13920, Pf13923, Pf14634, Pf15227	384309	ENSMUSG00000043279.9	Trim56	214204	409508	364820	416660	332552	245843	187981	396957	156086	254753	179846	173378	1
High	Master Protein	A0A0R4J0R1	vesicle-associated membrane protein 8 [OS=Mus musculus]	0	21.159	24	2	46	2	101	11.4	8.19	225	56.82	2	2	Pf00957	22320	ENSMUSG00000050732.9; ENSMUSG00000103205.1	Vamp8	2.9822e+06	3.7152e+06	3.33019e+06	3.68004e+06	3.52832e+06	4.21423e+06	2.61711e+06	3.60133e+06	1.4248e+06	2.25005e+06	1908129	2.97205e+06	1
High	Master Protein	A0A0R4J0U8	RIKEN cDNA 1190005F20, isoform CRA_a [OS=Mus musculus]	0	28.692	8	3	22	3	728	80.9	7.61	374	22.18	3	3	Pf02005, Pf02475, Pf13847	98685	ENSMUSG00000053286.11	1190005F20Rik; Trmt1l	425526	598480	569423	480536	676471	615308	373433	580137	243624	293808	365839	433940	1
High	Master Protein	A0A0R4J0V5	DNA-directed RNA polymerase subunit [OS=Mus musculus]	0	236.706	17	28	394	28	1932	213.3	7.43	3291	367.93	28	28	Pf00623, Pf04983, Pf04990, Pf04992, Pf04997, Pf04998, Pf05000	20020	ENSMUSG00000005198.15	Polr2a	2.61136e+07	2.6526e+07	2.74511e+07	3.07117e+07	2.46323e+07	2.45164e+07	2.29167e+07	2.5713e+07	1.17448e+07	1.87777e+07	1.33213e+07	1.729e+07	1
High	Master Protein	A0A0R4J0W6	leucine rich repeat containing 40, isoform CRA_a [OS=Mus musculus]	0	48.847	16	9	133	9	602	68	6.84	480	92.82	9	9	Pf12799, Pf13855	67144	ENSMUSG00000063052.9	Lrrc40	4.6969e+06	6.60868e+06	5.95281e+06	6.27806e+06	5.18849e+06	5.28961e+06	4.12191e+06	6.40612e+06	2.54687e+06	3.83852e+06	2.80596e+06	3.73045e+06	1
High	Master Protein	A0A0R4J0Z1	Protein disulfide-isomerase A4 [OS=Mus musculus]	0	440.757	54	31	1001	31	641	72.3	5.22	16117	1588.28	31	31	Pf00085, Pf01216, Pf13098, Pf13848, Pf13905	12304	ENSMUSG00000025823.9	Pdia4	1.33349e+08	1.15973e+08	1.10184e+08	1.35098e+08	1.2534e+08	1.22613e+08	1.17025e+08	1.12419e+08	4.71415e+07	8.26013e+07	6.77842e+07	8.64716e+07	1
High	Master Protein	A0A0R4J107	Acylamino-acid-releasing enzyme [OS=Mus musculus]	0	120.765	27	13	109	13	716	79.8	5.59	1071	117.18	13	13	Pf00326, Pf00561, Pf01738, Pf02230, Pf07859, Pf12695, Pf12697		ENSMUSG00000032590.14		1.17145e+07	1.63603e+07	1.048e+07	1.36829e+07	1.50883e+07	1.57642e+07	1.02804e+07	1.58589e+07	4.48382e+06	8.36597e+06	8.15985e+06	1.11176e+07	1
High	Master Protein	A0A0R4J114	Digestive organ expansion factor homolog [OS=Mus musculus]	0	13.736	4	3	36	3	768	88.2	5.95	351	35.29	3	3	Pf06862	215193	ENSMUSG00000016181.9	Diexf	2.71968e+06	2.59314e+06	2.24994e+06	2.75138e+06	3.44029e+06	2.0121e+06	2.38673e+06	2.51366e+06	962623	1.68224e+06	1.86053e+06	1.41901e+06	1
High	Master Protein	A0A0R4J124	SRSF protein kinase 2 [OS=Mus musculus]	0	48.934	8	5	83	2	682	76.8	4.91	352	69	5	5	Pf00069, Pf07714	20817	ENSMUSG00000062604.11	Srpk2	882513	939918	1.25031e+06	1.18828e+06	1.05594e+06	1.09599e+06	774475	911110	534937	726536	571055	772934	1
High	Master Protein	A0A0R4J131	Biotinidase [OS=Mus musculus]	0	4.143	2	1	2	1	529	59.2	5.97	30	1.8	1	1	Pf00795	26363	ENSMUSG00000021900.10	Btd	192197	293065	232153	354555	359903	284990	168668	284082	99325.3	216781	194637	200986	1
High	Master Protein	A0A0R4J140	Clustered mitochondria protein homolog [OS=Mus musculus]	0	145.894	17	19	305	19	1353	151.7	6.02	2727	296.86	19	19	Pf12807, Pf13236, Pf13374, Pf13424, Pf15044	74148	ENSMUSG00000020741.17	1300001I01Rik; Cluh	1.5883e+07	2.21072e+07	1.99274e+07	2.36105e+07	1.97975e+07	2.66954e+07	1.39386e+07	2.14297e+07	8.52583e+06	1.44359e+07	1.07066e+07	1.88267e+07	1
High	Master Protein	A0A0R4J175	Bromodomain-containing protein 9 [OS=Mus musculus]	0.004	2.551	2	1	2	1	597	66.9	6.27	25	0	1	1	Pf00439, Pf12024	105246	ENSMUSG00000057649.5	Brd9	174923	170414	194692	170757	96612.3	176958	153509	165191	83298	104404	52248.3	124798	1
High	Master Protein	A0A0R4J187	X-ray repair cross-complementing protein 6 [OS=Mus musculus]	0	77.419	13	7	128	7	608	69.4	6.52	1329	156.72	7	7	Pf02037, Pf02735, Pf03730, Pf03731	14375	ENSMUSG00000022471.13	Xrcc6	5.69355e+06	6.90908e+06	8.14591e+06	5.53898e+06	7.16099e+06	7.24868e+06	4.99654e+06	6.69732e+06	3.48518e+06	3.38663e+06	3.8727e+06	5112065	1
High	Master Protein	A0A0R4J1I3	Menin [OS=Mus musculus]	0	33.258	8	3	10	3	617	68	6.39	139	17.19	3	3	Pf05053	17283	ENSMUSG00000024947.16; ENSMUSG00000106695.3	Men1	775804	838865	1.09696e+06	1.03269e+06	904156	868413	680830	813155	469329	631403	488972	612441	1
High	Master Protein	A0A0R4J1I6	Nuclear pore membrane glycoprotein 210 [OS=Mus musculus]	0	233.886	17	23	337	23	1842	199.4	6.6	4440	474.38	23	22		54563	ENSMUSG00000030091.17	Nup210	2.11167e+07	2.03028e+07	2.20201e+07	2.72256e+07	2.53053e+07	2.07773e+07	1.85316e+07	1.96805e+07	9.42117e+06	1.66462e+07	1.36852e+07	1.4653e+07	1
High	Master Protein	A0A0R4J1N9	Transcription factor A, mitochondrial [OS=Mus musculus]	0	12.234	19	3	8	3	199	23.4	9.72	33	2.18	3	3	Pf00505, Pf09011	21780	ENSMUSG00000003923.14	Tfam	959621	745696	1.18423e+06	886780	741061	914192	842144	722841	506664	542193	400769	644726	1
High	Master Protein	A0A0R4J1Q0	Enhancer of mRNA-decapping protein 4 [OS=Mus musculus]	0	161.612	18	15	222	15	1390	150.6	5.68	2522	298.41	15	15	Pf00400	234699	ENSMUSG00000036270.16	Edc4	1.40421e+07	1.68146e+07	1.75458e+07	1.83695e+07	1.6713e+07	1.58273e+07	1.23231e+07	1.62992e+07	7.50688e+06	1.12314e+07	9.03845e+06	1.11621e+07	1	Oxidation [P1098]
High	Master Protein	A0A0R4J1R9	ERI1 exoribonuclease 3 [OS=Mus musculus]	0	5.633	7	1	14	1	125	14	5.3	79	11.26	1	1	Pf00929	140546	ENSMUSG00000033423.16	Eri3	465467	627486	669939	541908	534183	763910	408484	608254	286630	331332	288888	538741	1
Medium	Master Protein	A0A0R4J1U2	Iodothyronine deiodinase [OS=Mus musculus]	0.011	1.936	7	1	8	1	125	14.3	9.91	0	2.1	1	1	Pf00837	13370	ENSMUSG00000034785.14	Dio1	8.91612e+06	1.09914e+07	8.45547e+06	6.12927e+06	6.79351e+06	8.86973e+06	7.8246e+06	10654527	3.61762e+06	3.74755e+06	3.67396e+06	6.2553e+06	1
High	Master Protein	A0A0R4J1Z3	Transmembrane protein 33 [OS=Mus musculus]	0	61.069	27	8	234	8	246	27.9	9.66	2168	199.23	8	8	Pf03661	67878	ENSMUSG00000037720.16	Tmem33	1.9107e+07	2.4055e+07	2.46808e+07	2.79834e+07	2.74232e+07	3.0667e+07	1.67679e+07	2.33178e+07	1.05596e+07	1.71096e+07	1.48306e+07	2.16276e+07	1
High	Master Protein	A0A0R4J203	D-amino-acid oxidase [OS=Mus musculus]	0	7.545	7	2	24	2	345	38.6	7.36	117	14.93	2	2	Pf01266, Pf03721	13142	ENSMUSG00000042096.15	Dao	1.19926e+06	2.245e+06	906384	1.41794e+06	2.00922e+06	2.18453e+06	1.05244e+06	2.17619e+06	387791	866954	1.08659e+06	1.54062e+06	1
High	Master Protein	A0A0R4J250	Etoposide induced 2.4 mRNA [OS=Mus musculus]	0	5.818	2	1	24	1	358	40.8	9.55	158	6.72	1	1	Pf07264	13663	ENSMUSG00000062762.16	Ei24	606693	845961	697804	753811	680174	1.00114e+06	532421	820033	298551	460894	367841	706045	1
Medium	Master Protein	A0A0R4J288	DOM-3 homolog Z (C. elegans), isoform CRA_a [OS=Mus musculus]	0.015	1.777	2	1	2	1	397	45.3	8.06	0	0	1	1	Pf08652	112403	ENSMUSG00000040482.15	Dom3z; Dxo	166237	182282	167803	184203	201894	213421	145886	176695	71793.7	112625	109185	150513	1
High	Master Protein	A0A0R4J2B2	BTB/POZ domain-containing protein KCTD12 [OS=Mus musculus]	0	72.47	22	5	94	5	327	35.9	5.81	502	88.12	5	5	Pf02214	239217	ENSMUSG00000098557.1	Kctd12	5.83542e+06	5.76773e+06	6.12383e+06	6.10839e+06	6.6241e+06	7.70133e+06	5.12104e+06	5.59095e+06	2.62004e+06	3.73478e+06	3.58234e+06	5.4313e+06	1
High	Master Protein	A0A0R4J2B5	RIKEN cDNA 2310022A10 gene [OS=Mus musculus]	0	15.2	4	1	16	1	391	42.2	10.18	353	20.77	1	1		66367	ENSMUSG00000049643.15	2310022A10Rik	224867	195824	336174	235397	187417	213529	197338	189822	143830	143926	101356	150590	1
High	Master Protein	A0A0R4J2B6	Retinoblastoma-binding protein 5 [OS=Mus musculus]	0	24.431	8	3	45	3	537	59	5.1	385	42.94	2	3	Pf00400	213464	ENSMUSG00000026439.14	Rbbp5	934007	1.61062e+06	1.58789e+06	1.16728e+06	1.67011e+06	1.04672e+06	819665	1.56125e+06	679371	713697	903204	738193	1
High	Master Protein	A0A0U1RNL7	[3-methyl-2-oxobutanoate dehydrogenase [lipoamide]] kinase, mitochondrial [OS=Mus musculus]	0	19.383	9	2	38	2	335	38	9.42	545	64.32	2	2	Pf10436		ENSMUSG00000030802.14		1.15452e+06	1.39959e+06	1.27725e+06	1.53931e+06	1.5177e+06	1.39619e+06	1.01318e+06	1.35669e+06	546463	941164	820780	984651	1
Medium	Master Protein	A0A0U1RNS1	SAGA-associated factor 29 [OS=Mus musculus]	0.021	1.546	5	1	16	1	160	18	9.06	0	0	1	1	Pf07039		ENSMUSG00000030714.14		101918	146487	145428	160667	156850	151734	89441.1	141997	62220.7	98234.5	84825	107009	1
High	Master Protein	A0A0U1RNT0	phosphatidylinositol 4-phosphate 3-kinase C2 domain-containing subunit alpha [OS=Mus musculus]	0	26.132	16	6	52	1	448	51	8	106	28.99	6	5	Pf00454, Pf00613		ENSMUSG00000030660.9		1.3466e+06	1.78233e+06	2.56814e+06	3.03791e+06	2.12936e+06	3.54261e+06	1.18175e+06	1.7277e+06	1.09876e+06	1.85743e+06	1.15157e+06	2.49839e+06	1	Oxidation [P5; P7]
High	Master Protein	A0A0U1RP62	histocompatibility 47, isoform CRA_b [OS=Mus musculus]	0	5.187	11	1	4	1	187	21.2	9.39	24	4.17	1	1	Pf06936	109815	ENSMUSG00000075701.9	Vimp; Selenos	204477	194938	210328	232591	272429	345431	179445	188964	89987.4	142210	147331	243612	1
High	Master Protein	A0A0U1RPM3	PRA1 family protein [OS=Mus musculus]	0	14.965	6	1	28	1	226	25	8.5	214	37.19	1	1	Pf03208		ENSMUSG00000003380.11		708928	868630	638290	686734	732856	925984	622141	842007	273088	419881	396332	653042	1
High	Master Protein	A0A0U1RPV3	CDP-diacylglycerol--inositol 3-phosphatidyltransferase [OS=Mus musculus]	0	17.307	13	2	33	2	170	18.9	7.03	127	30.12	2	2	Pf01066	52858	ENSMUSG00000030682.4	Cdipt	2.68294e+06	2.25852e+06	3.53811e+06	1.93915e+06	3.29991e+06	2.04792e+06	2.35449e+06	2.1893e+06	1.51376e+06	1.18563e+06	1.78461e+06	1.44428e+06	1
High	Master Protein	A0A0U1RPV7	Polynucleotide 5'-hydroxyl-kinase NOL9 [OS=Mus musculus]	0	15.21	7	2	4	2	361	41	11.21	55	3.5	2	2			ENSMUSG00000028948.16		517122	460576	471582	713912	771675	876763	453816	446459	201763	436499	417325	618329	1
High	Master Protein	A0A0X1KG60	E3 ubiquitin-protein ligase BRE1B [OS=Mus musculus]	0	19.936	7	4	34	4	961	109.3	6.79	162	31.95	4	4	Pf00097, Pf01496, Pf13514, Pf13639, Pf13920, Pf13923, Pf14634		ENSMUSG00000030816.8		1.0138e+06	1.25138e+06	1.18204e+06	1.29109e+06	1.2548e+06	1.05883e+06	889690	1.21303e+06	505727	789393	678600	746730	1
High	Master Protein	A0A0X1KG62	Negative elongation factor B [OS=Mus musculus]	0	45.569	11	5	46	5	631	70.3	6.1	290	44.32	5	5	Pf06209		ENSMUSG00000013465.18		2.91391e+06	2.05252e+06	2.78549e+06	3.02595e+06	3.02979e+06	1.64483e+06	2.55719e+06	1.98961e+06	1.19176e+06	1.85012e+06	1.63852e+06	1.16e+06	1
High	Master Protein	A0A140LHA2	Mitotic checkpoint protein BUB3 [OS=Mus musculus]	0	150.284	42	11	445	11	324	36.7	6.84	5315	538.49	11	11	Pf00400, Pf04762		ENSMUSG00000066979.6		3.71003e+07	3.5926e+07	3.86119e+07	3.96072e+07	3.77168e+07	3.7222e+07	3.25584e+07	3.48249e+07	1.65199e+07	2.42166e+07	2.03974e+07	2.62505e+07	1	Oxidation [P45]
High	Master Protein	A0A140LHN0	Protein YIF1B [OS=Mus musculus]	0	32.102	16	3	32	3	315	34.3	7.03	651	48.77	3	3	Pf03878		ENSMUSG00000030588.12		2.43438e+06	2.89394e+06	2.50499e+06	2.92838e+06	2.73402e+06	3.11838e+06	2136363	2.80525e+06	1.07175e+06	1.79046e+06	1.47857e+06	2.19921e+06	1	Oxidation [P33]
High	Master Protein	A0A140LIF0	5-demethoxyubiquinone hydroxylase, mitochondrial [OS=Mus musculus]	0.006	2.301	5	1	5	1	222	24.7	7.53	0	0	1	1	Pf03232	12850	ENSMUSG00000030652.11	Coq7	1.1483e+06	1.16136e+06	1.09629e+06	1.16883e+06	1.25273e+06	1.16695e+06	1.00773e+06	1.12577e+06	469043	714642	677485	822978	1
High	Master Protein	A0A140LJJ5	A-kinase anchor protein 13 [OS=Mus musculus]	0	11.6	1	2	5	2	2794	305.8	5.35	48	2.86	2	2	Pf00169, Pf00621	75547	ENSMUSG00000066406.15	Akap13	176773	145696	216035	220121	231287	161370	155132	141230	92429.5	134586	125081	113805	1
High	Master Protein	A0A140T8P3	immunoglobulin kappa chain variable 15-103 [OS=Mus musculus]	0	7.534	10	1	2	1	115	12.5	7.8	34	3.19	1	1	Pf07686	692169	ENSMUSG00000076523.2	Igkv15-103	2.63941e+06	1.76443e+06	3.36226e+06	2.49067e+06	1.42229e+06	989987	2.31629e+06	1.71035e+06	1.43852e+06	1.52284e+06	769180	698180	1
High	Master Protein	A0A140T8R7	REST corepressor 1 [OS=Mus musculus]	0	17.325	10	3	15	3	382	43.9	7.25	127	19.15	3	2	Pf00249, Pf01448	217864	ENSMUSG00000037896.17	Rcor1	1.54346e+06	1.77565e+06	1.7232e+06	2.07974e+06	1.42465e+06	1.60761e+06	1.35451e+06	1.72122e+06	737262	1.27159e+06	770459	1.13375e+06	1
High	Master Protein	A0A141CM32	ATP synthase protein 8 [OS=Mus musculus]	0	35.065	46	3	148	3	67	7.8	9.88	1404	156.3	3	3	Pf00895				1.9675e+07	2.81182e+07	1.92515e+07	2.30519e+07	2.62472e+07	3.48099e+07	1.72664e+07	2.72564e+07	8.23665e+06	1.40943e+07	1.41946e+07	2.45494e+07	1
High	Master Protein	A0A171EBL2	E3 ubiquitin-protein ligase RNF213 [OS=Mus musculus]	0	49.644	2	8	54	8	5151	584.3	6.79	500	51.87	8	7	Pf00097, Pf07728, Pf12773, Pf13248, Pf13639, Pf13920, Pf13923, Pf14634, Pf15227		ENSMUSG00000070327.14		2.35877e+06	2.70387e+06	2.5199e+06	2.5115e+06	2.95846e+06	2.30205e+06	2.07001e+06	2.62099e+06	1.07813e+06	1.53557e+06	1.59995e+06	1.6235e+06	1
High	Master Protein	A0A171KXD3	protein arginine N-methyltransferase 1 [OS=Mus musculus]	0	370.401	62	19	825	19	318	36.5	6.19	14601	1395.11	19	19	Pf05175, Pf06325, Pf08241, Pf12847, Pf13489, Pf13649, Pf13847		ENSMUSG00000109324.1		9.89141e+07	1.13095e+08	1.11543e+08	1.06969e+08	1.11199e+08	1.17445e+08	8.6805e+07	1.09628e+08	4.7723e+07	6.54026e+07	6.0137e+07	8.28271e+07	1
High	Master Protein	A0A1B0GQW0	ER lumen protein-retaining receptor [OS=Mus musculus]	0	40.332	20	2	76	2	150	17.5	7.43	1291	142.3	2	2	Pf00810		ENSMUSG00000002778.14		1.92409e+07	1.82624e+07	1.64302e+07	2.2728e+07	2.49059e+07	2.01012e+07	1.68855e+07	1.77027e+07	7.02957e+06	1.38963e+07	1.34692e+07	1.41762e+07	1
High	Master Protein	A0A1B0GR44	U1 small nuclear ribonucleoprotein 70 kDa [OS=Mus musculus]	0	104.434	53	8	221	1	116	13.9	9.04	2087	291.83	8	7	Pf00076, Pf13893, Pf14259		ENSMUSG00000063511.11		159745	302071	208654	249538		212736	140189	292812	89271.4	152572		150031	1
High	Master Protein	A0A1B0GR76	Chromodomain-helicase-DNA-binding protein 9 [OS=Mus musculus]	0	8.213	1	3	36	2	1853	211.4	7.25	117	9.53	3	3	Pf00176, Pf00270, Pf00271, Pf00385, Pf11496		ENSMUSG00000056608.14		1.15416e+06	1.50364e+06	1.63266e+06	1.5797e+06	1.30381e+06	1.51473e+06	1.01286e+06	1.45756e+06	698522	965854	705104	1.06825e+06	1
High	Master Protein	A0A1B0GRL0	PIH1 domain-containing protein 1 [OS=Mus musculus]	0.004	2.689	4	1	2	1	175	18.9	5.58	22	1.69	1	1	Pf08190		ENSMUSG00000003423.15		220579	236107	208505	227767	267016	236901	193576	228871	89207.8	139261	144404	167072	1
High	Master Protein	A0A1B0GRU3	Zinc finger CCCH domain-containing protein 4 [OS=Mus musculus]	0	12.277	4	2	11	2	1180	127.4	6.55	22	4.94	2	2	Pf00642		ENSMUSG00000059273.9		511523	289796	638360	622231	379028	246673	448902	280914	273119	380443	204980	173964	1
High	Master Protein	A0A1B0GRU8	pre-mRNA-processing factor 40 homolog A [OS=Mus musculus]	0	85.469	12	9	173	9	926	105.5	7.99	881	145.32	9	9	Pf00397, Pf01846	56194	ENSMUSG00000061136.14	Prpf40a	1.23338e+07	1.24524e+07	1.30524e+07	1.63732e+07	1.31057e+07	1.29659e+07	1.08239e+07	1.20707e+07	5.5844e+06	1.00108e+07	7.08762e+06	9.14411e+06	1
High	Master Protein	A0A1B0GS13	Apoptosis regulator BAX [OS=Mus musculus]	0	57.936	32	3	64	2	114	12.6	4.94	941	88.83	3	3	Pf00452		ENSMUSG00000003873.11		1.53383e+06	1.66021e+06	1.63022e+06	5.77692e+06	1.88223e+06	1.63048e+06	1.34606e+06	1.60933e+06	697478	3.53211e+06	1.01792e+06	1.14988e+06	1
High	Master Protein	A0A1B0GS22	Reticulocalbin-3 [OS=Mus musculus]	0.003	2.82	6	1	2	1	122	14.3	4.67	22	1.76	1	1	Pf13499		ENSMUSG00000019539.11		549484	556825	430664	595211	557491	462245	482216	539758	184257	363922	301494	325994	1
High	Master Protein	A0A1B0GSG5	Ribonuclease inhibitor [OS=Mus musculus]	0	160.589	28	11	303	11	492	53.9	5.01	4926	450.28	11	11		107702	ENSMUSG00000038650.15	Rnh1	1.70419e+07	2.17263e+07	1.74499e+07	1.79325e+07	2.02072e+07	1.89357e+07	1.49556e+07	2.10604e+07	7.46584e+06	1.09642e+07	1.09281e+07	1.33542e+07	1
High	Master Protein	A0A1B0GSM3	ADP-ribosylation factor interacting protein 2, isoform CRA_d [OS=Mus musculus]	0	6.871	4	1	2	1	267	29.3	5.53	30	2.29	1	1	Pf06456	76932	ENSMUSG00000030881.15	Arfip2	270001	535496	393439	371161	454258	475512	236947	519084	168330	226935	245665	335350	1
High	Master Protein	A0A1B0GSU0	Aldehyde dehydrogenase family 16 member A1 [OS=Mus musculus]	0	65.823	12	7	110	7	802	84.7	6.32	1341	133.79	7	7	Pf00171, Pf07368	69748	ENSMUSG00000007833.15	Aldh16a1	8.38088e+06	9.653e+06	8.03503e+06	8.62289e+06	9.1034e+06	7.54508e+06	7.35489e+06	9.35714e+06	3.43774e+06	5.27219e+06	4.92316e+06	5.3211e+06	1
High	Master Protein	A0A1B0GSZ9	39S ribosomal protein L23, mitochondrial [OS=Mus musculus]	0	29.01	16	2	12	2	172	20	10.23	289	20.5	2	2	Pf00276		ENSMUSG00000037772.13		1.49218e+06	1.39039e+06	1.6117e+06	1.44455e+06	2.16404e+06	2.37799e+06	1.30951e+06	1.34777e+06	689555	883223	1.17032e+06	1.67706e+06	1
High	Master Protein	A0A1C7CYU3	nucleobindin 1, isoform CRA_b [OS=Mus musculus]	0	19.357	6	2	5	2	455	53	5.07	57	6.23	1	2		18220	ENSMUSG00000030824.17	Nucb1	1.46302e+06	1.19796e+06	1.52848e+06	918967	1.696e+06	1.40585e+06	1.28392e+06	1.16124e+06	653953	561873	917205	991462	1
High	Master Protein	A0A1C7CYV0	Plastin-3 [OS=Mus musculus]	0	222.555	33	16	398	10	629	70.6	5.62	4566	559.6	16	15	Pf00307, Pf13499		ENSMUSG00000016382.15		2.95441e+07	4.14159e+07	2.79783e+07	3.24241e+07	3.4836e+07	3.43454e+07	2.59273e+07	4.01465e+07	1.19703e+07	1.98247e+07	1.88395e+07	2.42218e+07	1	Oxidation [P148]
Medium	Master Protein	A0A1D5RLD4	DNA-directed RNA polymerase II subunit RPB3 [OS=Mus musculus]	0.025	1.434	6	1	3	1	170	19.3	5.86	0		1		Pf01000, Pf01193		ENSMUSG00000031783.10			2.56265e+06	977078	1.22146e+06	1.42949e+06	2.27714e+06		2.4841e+06	418037	746821	773076	1.60593e+06	1
High	Master Protein	A0A1D5RLK9	Adhesion G-protein-coupled receptor G1 [OS=Mus musculus]	0.003	2.848	6	1	2	1	185	21.3	8.75	0	0	1	1			ENSMUSG00000031785.16		142499		177296	146482	185624	190473	125054		75855.2	89561.8	100386	134329	1
High	Master Protein	A0A1D5RLV0	protein IWS1 homolog [OS=Mus musculus]	0	8.569	2	1	14	1	765	85.3	4.69	14	13.59	1	1	Pf03344, Pf05110, Pf05782, Pf08711, Pf09507, Pf10243	73473	ENSMUSG00000024384.4	Iws1	598894	634285	850480	629970	518609	430648	525577	614844	363873	385175	280466	303711	1
High	Master Protein	A0A1D5RLV7	WD repeat and FYVE domain-containing protein 3 [OS=Mus musculus]	0	4.384	0	1	6	1	3512	392.6	6.74	68	5.62	1	1	Pf00400, Pf01363, Pf02138, Pf13385, Pf14844	72145	ENSMUSG00000043940.15	Wdfy3	201995	313325	248502	304402	326221	242498	177266	303722	106320	186117	176422	171019	1
High	Master Protein	A0A1D5RM83	IQ motif and SEC7 domain-containing protein 1 [OS=Mus musculus]	0	5.739	1	1	2	1	1051	117.9	7.68	22	2.44	1	1	Pf01369	232227	ENSMUSG00000034312.14	Iqsec1	119241	137142	123641	103566	108775	187282	104643	132939	52899.1	63322.4	58825.9	132079	1
High	Master Protein	A0A1D5RM85	60S ribosomal protein L18a [OS=Mus musculus]	0	145.498	39	13	578	13	219	24.6	9.94	6647	804.11	13	13	Pf01775		ENSMUSG00000045128.9		1.88304e+08	1.66085e+08	2.01068e+08	2.03627e+08	1.98862e+08	2.00937e+08	1.65252e+08	1.60994e+08	8.60257e+07	1.24501e+08	1.07545e+08	1.41709e+08	1	Oxidation [K128]
High	Master Protein	A0A1D5RMG4	Arf-GAP with GTPase, ANK repeat and PH domain-containing protein 3 [OS=Mus musculus]	0	12.89	4	1	2	1	396	42.4	8.06	53	2.37	1	1	Pf00071, Pf08477		ENSMUSG00000023353.14			185089	228006	201011	142285	301013		179416	97550.8	122902	76948.2	212287	1
High	Master Protein	A0A1D5RML8	DNA-directed RNA polymerase II subunit RPB3 [OS=Mus musculus]	0	30.401	10	2	36	2	439	48.3	6.05	344	52.87	2	2	Pf01000, Pf01193		ENSMUSG00000031783.10		982108	824702	862422	981452	839559	991348	861878	799425	368982	600077	454038	699139	1
High	Master Protein	A0A1L1SQA8	40S ribosomal protein S25 [OS=Mus musculus]	0	43.028	40	5	293	5	93	10.3	9.99	4960	396.97	5	5	Pf03297		ENSMUSG00000009927.9		9.12779e+07	7.34732e+07	8.51843e+07	9.18318e+07	8.57271e+07	9.43888e+07	8.01036e+07	7.12213e+07	3.64456e+07	56147635	4.63616e+07	6.65669e+07	1
High	Master Protein	A0A1L1SR54	calmodulin-like protein 4 [OS=Mus musculus]	0	3.942	11	1	6	1	117	13.4	7.5	16	3.87	1	1	Pf08275, Pf13499, Pf13833	75600	ENSMUSG00000032246.14	Calml4	219996	297684	177191	283329	297608	262043	193064	288560	75810	173232	160948	184803	1
High	Master Protein	A0A1L1SRX2	AMP deaminase [OS=Mus musculus]	0.001	3.581	1	1	20	1	775	89.5	7.14	174	12.43	1	1	Pf00962	11717	ENSMUSG00000005686.17	Ampd3	212844	306203	197511	204596	291527	237271	186787	296818	84503.9	125094	157659	167333	1
High	Master Protein	A0A1L1SS47	CCR4-NOT transcription complex subunit 10 [OS=Mus musculus]	0	16.854	5	2	22	2	405	45	7.9	120	22.92	2	2	Pf10046		ENSMUSG00000056167.7		1.61253e+06	1.70436e+06	1.65185e+06	1.5552e+06	1.52715e+06	729267	1.41512e+06	1.65212e+06	706736	950880	825887	514309	1
High	Master Protein	A0A1L1SSA8	Transmembrane protein 205 [OS=Mus musculus]	0	6.373	10	1	11	1	173	19.6	9.41	26	6.68	1	1	Pf13664		ENSMUSG00000040883.16		366112	577451	416490	533767	620518	745891	321292	559753	178193	326355	335579	526033	1
High	Master Protein	A0A1L1SSF2	ADP-dependent glucokinase [OS=Mus musculus]	0	58.773	17	6	44	6	496	53.9	5.62	410	30.93	6	6	Pf04587	72141	ENSMUSG00000025236.11	Adpgk	2.42707e+06	3.77095e+06	2.68402e+06	2.63794e+06	3.11748e+06	3.62506e+06	2.12995e+06	3.65537e+06	1.14834e+06	1.61288e+06	1.68595e+06	2.55654e+06	1
High	Master Protein	A0A1L1STE6	Isocitrate dehydrogenase [NAD] subunit, mitochondrial [OS=Mus musculus]	0	188.893	34	13	335	13	384	41.5	6.93	3720	502.48	13	13	Pf00180		ENSMUSG00000032279.11		4.59936e+07	6.17915e+07	5.30101e+07	6.04347e+07	6.28489e+07	6.25681e+07	4.03631e+07	5.98976e+07	2.26801e+07	3.69509e+07	3.3989e+07	4.41256e+07	1	Oxidation [P126]
High	Master Protein	A0A1L1SU47	39S ribosomal protein L3, mitochondrial [OS=Mus musculus]	0	7.708	16	2	28	2	137	15.3	8.47	348	7.56	2	2	Pf00297		ENSMUSG00000032563.16		1.44572e+06	1.8658e+06	1.49585e+06	1.73741e+06	1.82287e+06	1.9886e+06	1.26873e+06	1.80861e+06	639992	1.06229e+06	985814	1.40244e+06	1
High	Master Protein	A0A1L1SUG9	cadherin EGF LAG seven-pass G-type receptor 3 [OS=Mus musculus]	0.004	2.58	0	1	3	1	3309	359.1	6.62	27	0	1	1	Pf00002, Pf00008, Pf00028, Pf00053, Pf00054, Pf01500, Pf01825, Pf02210, Pf02793, Pf06247, Pf12003, Pf12947	107934	ENSMUSG00000023473.12; ENSMUSG00000107269.4	Celsr3	112059	179511	121440	147933	186207	150972	98340.4	174009	51957.3	90448.9	100702	106472	1
High	Master Protein	A0A1L1SUI3	solute carrier family 37 (glucose-6-phosphate transporter), member 4 [OS=Mus musculus]	0	37.358	5	2	76	2	450	48.4	8.32	748	87.41	2	2	Pf07690	14385	ENSMUSG00000032114.9	Slc37a4	3.08817e+06	4.35612e+06	2.90169e+06	3.16977e+06	4.07572e+06	5.77075e+06	2.71012e+06	4.2226e+06	1.24147e+06	1.93805e+06	2.20417e+06	4.06977e+06	1
High	Master Protein	A0A1L1SUX8	Thy-1 membrane glycoprotein [OS=Mus musculus]	0	45.014	41	4	52	4	125	14	9.22	714	72.34	4	4	Pf00047		ENSMUSG00000032011.5		3.37464e+06	4.36344e+06	2.95087e+06	3.93345e+06	5.62841e+06	7.21164e+06	2.96151e+06	4.2297e+06	1.26251e+06	2.40498e+06	3.04387e+06	5.08595e+06	1
High	Master Protein	A0A1L1SV73	ubiquitin carboxyl-terminal hydrolase 47 [OS=Mus musculus]	0	38.143	5	6	41	6	1376	157.1	5.06	378	19.74	6	5	Pf00443, Pf13423	74996	ENSMUSG00000059263.9	Usp47	2.38227e+06	3.038e+06	1.91667e+06	2.33177e+06	2.84577e+06	2.80132e+06	2.09063e+06	2.94489e+06	820036	1.42569e+06	1.53901e+06	1.9756e+06	1
High	Master Protein	A0A1L1SVK0	platelet-activating factor acetylhydrolase IB subunit beta [OS=Mus musculus]	0	20.337	14	2	48	2	197	22	6.14	965	93.66	2	2	Pf13472		ENSMUSG00000003131.7		5.30845e+06	5.24752e+06	7.45554e+06	7.63859e+06	8.20193e+06	6.76534e+06	4.65858e+06	5.08669e+06	3.18981e+06	4.67037e+06	4.43564e+06	4.7712e+06	1
High	Master Protein	A0A1L7NR37	Arg/Abl-binding protein 2 [OS=Mus musculus]	0	47.475	16	7	64	7	717	79.4	9.42	98	57.59	7	7	Pf00018, Pf02208, Pf07653, Pf14604	234214		Sorbs2	2.48584e+06	2.88777e+06	1.83642e+06	3.60231e+06	2.98937e+06	3.49945e+06	2.18152e+06	2.79926e+06	785701	2.20251e+06	1.61666e+06	2.46796e+06	1
High	Master Protein	A0A1S6GWH1	Uncharacterized protein [OS=Mus musculus]	0	223.749	45	15	343	15	416	46.6	7.88	4305	552.26	15	15	Pf00004, Pf00910, Pf01057, Pf01078, Pf05496, Pf06068, Pf06414, Pf07724, Pf07726, Pf07728, Pf13191, Pf13207, Pf13401	19184		Psmc5	4.37955e+07	4.69847e+07	3.96386e+07	4.40605e+07	4.22706e+07	4.70077e+07	3.8434e+07	4.55447e+07	1.69592e+07	2.69394e+07	2.28601e+07	3.31517e+07	1
High	Master Protein	A0A1S6GWH4	Uncharacterized protein [OS=Mus musculus]	0	126.129	20	13	193	13	782	88	6.74	1847	206.65	13	13	Pf01189, Pf13659	28114		Nsun2	1.80947e+07	1.41671e+07	1.45011e+07	1.45957e+07	1.34376e+07	1.29122e+07	1.58795e+07	1.37329e+07	6.20422e+06	8.92408e+06	7.26714e+06	9.1062e+06	1
High	Master Protein	A0A1S6GWH5	Uncharacterized protein [OS=Mus musculus]	0	673.158	40	38	1512	38	1118	124.2	5.99	24083	2574.84	38	38	Pf00899, Pf02134, Pf09358, Pf10585	22201		Uba1	2.99179e+08	3.46262e+08	3.01263e+08	3.03052e+08	3.12352e+08	2.94725e+08	2.62553e+08	3.3565e+08	1.28893e+08	1.85292e+08	1.68921e+08	2.07852e+08	1	Oxidation [K1033; P1074]
High	Master Protein	A0A1S6GWH6	Uncharacterized protein [OS=Mus musculus]	0	116.154	4	12	124	12	4939	537.6	6.13	709	91.5	12	12	Pf00179, Pf00653, Pf12356	12211		Birc6	4.45908e+06	5.53814e+06	4.7158e+06	4.97746e+06	5.21215e+06	4.36189e+06	3.9132e+06	5.3684e+06	2.01763e+06	3.04331e+06	2.81876e+06	3.07618e+06	1
High	Master Protein	A0A1S6GWI6	Uncharacterized protein [OS=Mus musculus]	0	15.874	10	2	19	2	279	30	8.06	141	21.22	2	2		66362		Exosc3	206622	251837	161294	242727	158902	279172	181327	244118	69008.6	148407	85935.1	196883	1
High	Master Protein	A0A1S6GWJ5	Uncharacterized protein [OS=Mus musculus]	0	53.259	8	7	66	7	1218	135.7	5.99	173	35.5	7	7	Pf14750	70422		Ints2	2.94669e+06	3.26742e+06	2.91836e+06	3.93237e+06	3.10082e+06	2.98802e+06	2.58595e+06	3.16728e+06	1.2486e+06	2.40432e+06	1.67694e+06	2.10728e+06	1
High	Master Protein	A0A1S6GWJ6	Uncharacterized protein [OS=Mus musculus]	0	10.866	3	1	24	1	550	60.8	8.21	193	28.59	1	1	Pf04153	72068		Cnot2	501510	557271	619776	790678	574694	707929	440115	540191	265168	483435	310797	499260	1
High	Master Protein	A0A1W2P6F6	Myosin light polypeptide 6 [OS=Mus musculus]	0	107.432	58	9	197	8	152	17	4.5	2997	272.51	9	8	Pf00036, Pf13405, Pf13499		ENSMUSG00000090841.2		1.51443e+07	1.65975e+07	2.00213e+07	1.80682e+07	1.84483e+07	2.14647e+07	1.32903e+07	1.60888e+07	8.566e+06	1.10472e+07	9.9769e+06	1.51378e+07	1
Medium	Master Protein	A0A1W2P6U2	signal peptide peptidase-like 2B [OS=Mus musculus]	0.023	1.499	5	1	4	1	239	26.8	8.57	0		1		Pf04258		ENSMUSG00000035206.10		903800	1.29603e+06	935093	976390	1.07501e+06	1.01122e+06	793156	1.25631e+06	400074	596982	581368	713153	1
High	Master Protein	A0A1W2P729	Protein canopy homolog 2 [OS=Mus musculus]	0	51.755	40	4	68	4	136	15.3	5.58	1070	97.96	4	4	Pf11938		ENSMUSG00000025381.3		3.69915e+06	4.48024e+06	4.79249e+06	6.8048e+06	4.5198e+06	6.26285e+06	3.24629e+06	4.34293e+06	2.05044e+06	4.16057e+06	2.44433e+06	4.41682e+06	1
High	Master Protein	A0A1W2P7A1	40S ribosomal protein S12 [OS=Mus musculus]	0	127.541	52	8	361	8	148	16	8.16	4977	572.06	8	8	Pf01248		ENSMUSG00000061983.7		5.01676e+07	5.26781e+07	5.65725e+07	6.1268e+07	5.78843e+07	6.71818e+07	4.40261e+07	5.10636e+07	2.42042e+07	3.74604e+07	3.13041e+07	4.73794e+07	1
High	Master Protein	A0A1W2P7K6	RAB3A interacting protein, isoform CRA_b [OS=Mus musculus]	0	24.224	10	4	14	4	460	50.9	5.94	55	8.2	4	4	Pf01576, Pf03962, Pf04111, Pf05103, Pf06428, Pf13514	216363	ENSMUSG00000064181.6	Rab3ip	1.98099e+06	2.40309e+06	1.78491e+06	2.21545e+06	2.22891e+06	2.24869e+06	1.73848e+06	2.32944e+06	763665	1.35456e+06	1.2054e+06	1.58587e+06	1
High	Master Protein	A0A1W2P7Q6	Exportin-T [OS=Mus musculus]	0	56.795	8	6	85	6	962	109.7	5.31	966	103.02	6	5	Pf08389	73192	ENSMUSG00000034667.8	Xpot	2.10104e+06	2.70862e+06	2.46313e+06	2.4513e+06	2.63821e+06	2.37756e+06	1.84383e+06	2.6256e+06	1.05384e+06	1.49877e+06	1.42676e+06	1.67675e+06	1
Medium	Master Protein	A0A1W2P7R0	Zinc transporter ZIP5 [OS=Mus musculus]	0.02	1.585	5	1	2	1	176	18.5	5.58	20	0	1	1			ENSMUSG00000039878.13		62247	100364			55676.2	97290.6	54626.6	97287.5			30110	68613.4	1
High	Master Protein	A0A1W2P7U7	Periodic tryptophan protein 1 homolog [OS=Mus musculus]	0	14.064	22	2	26	2	94	10.3	4.41	213	19.8	2	2			ENSMUSG00000001785.13		1.17901e+06	1.02672e+06	1.23765e+06	1.31233e+06	1.08575e+06	1.15044e+06	1.03467e+06	995253	529520	802380	587181	811340	1
High	Master Protein	A0A1W2P7Z1	GDP-fucose protein O-fucosyltransferase 2 [OS=Mus musculus]	0	24.739	15	3	71	3	209	24.2	6.23	531	65.88	3	3	Pf10250		ENSMUSG00000020260.9		2.11642e+06	2.59184e+06	2.2313e+06	2.3166e+06	2.14484e+06	2.51835e+06	1.85733e+06	2.5124e+06	954648	1.41641e+06	1159937	1.77604e+06	1
High	Master Protein	A0A1W2P8E1	Acetolactate synthase-like protein [OS=Mus musculus]	0	16.67	4	2	10	2	596	64.1	8.6	34	7.28	2	2	Pf00205, Pf02775, Pf02776		ENSMUSG00000032763.11		995122	1.05305e+06	1.0218e+06	1.13047e+06	1.03304e+06	1.2943e+06	873299	1.02077e+06	437171	691192	558675	912796	1
High	Master Protein	A0A1Y7VJN6	Immunoglobulin heavy constant gamma 3 [OS=Mus musculus]	0	45.845	17	6	120	6	399	44	7.14	913	93.31	6	6	Pf07654, Pf08205				1.46785e+07	6.55242e+06	1.6429e+07	1.52777e+07	6.89468e+06	2.29591e+07	1.28815e+07	6.35159e+06	7.02906e+06	9.34107e+06	3.72867e+06	1.61917e+07	1
High	Master Protein	A0A1Y7VJW9	Fibulin-5 [OS=Mus musculus]	0	34.315	8	3	76	3	461	51.7	4.78	1018	98.34	3	3	Pf07645, Pf12662, Pf12947, Pf14670	23876		Fbln5	2.08529e+06	2.1541e+06	1.78726e+06	1.99814e+06	2.0318e+06	2.20648e+06	1.83001e+06	2.08808e+06	764668	1.2217e+06	1.09881e+06	1.5561e+06	1
High	Master Protein	A0A1Y7VK55	Nuclear factor 1 [OS=Mus musculus]	0	27.168	8	3	77	1	461	51.3	8.31	668	70.71	3	3	Pf00859, Pf03165, Pf10524				527562	393192	460594	454017	391217	476361	462978	381141	197062	277594	211572	335949	1
High	Master Protein	A0A1Y7VKC6	Isoamyl acetate-hydrolyzing esterase 1 homolog [OS=Mus musculus]	0	29.43	26	4	40	4	185	20.3	8.18	681	45.7	4	4	Pf00657, Pf13472				1.41166e+06	2.69276e+06	1.07633e+06	1.48667e+06	2.66582e+06	1.88063e+06	1.23884e+06	2.61023e+06	460503	908978	1.44169e+06	1.3263e+06	1
High	Master Protein	A0A1Y7VLD5	Serine (Or cysteine) peptidase inhibitor, clade B, member 6b [OS=Mus musculus]	0.004	2.542	3	1	2	1	258	29.6	5	20	0	1	1	Pf00079	20708		Serpinb6b	167642	126972	98977.8	110222		209453	147119	123080	42347.1	67391.9		147715	1
High	Master Protein	A0A1Y7VLP0	RIKEN cDNA 2010107E04 gene [OS=Mus musculus]	0	10.907	14	1	96	1	57	6.6	9.99	698	111.56	1	1	Pf08039	70257		2010107E04Rik	1.22248e+07	1.54603e+07	1.29536e+07	1.42524e+07	1.68631e+07	2.11029e+07	1.07282e+07	1.49865e+07	5.54213e+06	8714187	9.11964e+06	14882621	1
High	Master Protein	A0A1Y7VM45	Pre-mRNA-processing factor 39 [OS=Mus musculus]	0	4.57	14	2	15	2	208	24.1	4.97	45	2.06	2	2					860637	941800	667203	1.02314e+06	844792	832453	755277	912934	285459	625566	456867	587080	1
Medium	Master Protein	A0A1Y7VMD3	Golgin subfamily A member 5 [OS=Mus musculus]	0.032	1.214	6	1	3	1	234	26.8	5.22	0		1		Pf03938, Pf03961, Pf04111, Pf04156, Pf04799, Pf04977, Pf06160, Pf07888, Pf08317, Pf09726, Pf09787, Pf10186, Pf10234				231498	249569	159213	401497	727513	627414	203158	241919	68118.2	245482	393442	442478	1
High	Master Protein	A0A1Y7VMH3	Serine/threonine-protein kinase VRK1 [OS=Mus musculus]	0	63.476	24	7	106	7	413	46.8	8.69	1302	148.48	7	7	Pf00069, Pf07714				1.04077e+07	9.45058e+06	7.22257e+06	1.23067e+07	9.77083e+06	1.49584e+07	9.13354e+06	9.16093e+06	3.09013e+06	7.52457e+06	5.28411e+06	1.05493e+07	1
High	Master Protein	A0A217FL49	uridine diphosphate glucose pyrophosphatase [OS=Mus musculus]	0	26.433	13	2	14	2	210	23.1	5.1	166	9.06	2	2	Pf00293	66174		Nudt14	579409	835682	535588	686257	814416	792827	508478	810069	229148	419590	440440	559134	1
High	Master Protein	A0A217FL60	tumor suppressing subtransferable candidate 1 [OS=Mus musculus]	0	5.886	10	1	2	1	135	15.2	6.06	34	1.95	1	1					330823	325133	362501	319787	328726	332529	290324	315168	155094	195523	177777	234513	1
High	Master Protein	A0A286YDV7	Nucleolar and coiled-body phosphoprotein 1 (Fragment) OS=Mus musculus GN=Nolc1 PE=1 SV=1	0	6.858	3	2	10	2	702	73.6	9.36	18		2						340712	207107	2.66869e+06	2.69865e+06	367807	1.6288e+06	299001	200759	1.14178e+06	1.65e+06	198912	1.1487e+06	1
High	Master Protein	A0A5E1	Insulin-like growth factor binding protein 7 [OS=Mus musculus]	0	75.163	23	5	45	5	281	28.9	8.22	177	38.18	5	5	Pf07648, Pf07679	29817		Igfbp7	3.20668e+06	4.91579e+06	2.27536e+06	3.85799e+06	4.40597e+06	5.07327e+06	2.81411e+06	4.76512e+06	973501	2.35884e+06	2.38277e+06	3.57788e+06	1
High	Master Protein	A0EQY3	Jacobsen syndrome region 2 protein [OS=Mus musculus]	0.01	2.009	1	1	2	1	1506	169.3	7.09	0	0	1	1	Pf01417, Pf01602, Pf12717, Pf12719	78658		Ncapd3	104057		154368	164386	162116	123581	91318.7		66045.6	100509	87673.3	87154.2	1
High	Master Protein	A0JNY7	Eukaryotic translation initiation factor 4, gamma 2 [OS=Mus musculus]	0	156.252	22	16	354	16	906	102.1	7.14	3432	414.89	16	16	Pf02020, Pf02847, Pf02854	13690		Eif4g2	1.72944e+07	1.76466e+07	1.98578e+07	2.61282e+07	1.89154e+07	1.99223e+07	1.51772e+07	1.71058e+07	8.49603e+06	1.59752e+07	1.02295e+07	1.405e+07	1
High	Master Protein	A0PJ96	Mtap1b protein [OS=Mus musculus]	0	9.491	2	1	6	1	724	81.7	8.47	53	9.05	1	1		17755		Map1b; Mtap1b	842978	732968	1.19027e+06	551425	762103	1.21386e+06	739780	710503	509250	337151	412149	856065	1
High	Master Protein	A0PJE6	pccB protein [OS=Mus musculus]	0	65.781	13	5	125	5	539	58.1	7.66	1962	163.04	5	5	Pf01039	66904		Pccb	4.88682e+06	7.22692e+06	5.04774e+06	5.95247e+06	7.44367e+06	8.21157e+06	4.28857e+06	7.00542e+06	2.15964e+06	3.63945e+06	4.02557e+06	5.79114e+06	1
High	Master Protein	A0ZVB6	TBP-associated factor 170 [OS=Mus musculus]	0	17.964	2	3	28	3	1848	206.9	6.43	173	22.59	3	3	Pf00176, Pf00271, Pf12054	107182		Btaf1	557472	764189	606653	709067	622476	631728	489226	740767	259553	433536	336638	445520	1
High	Master Protein	A1A4A7	Pgam5 protein [OS=Mus musculus]	0	42.401	28	8	76	8	291	32.3	9.04	294	55.97	8	8	Pf00300	72542		Pgam5	8.40163e+06	9.80774e+06	1.08986e+07	1.04868e+07	1.17139e+07	1.06253e+07	7.37309e+06	9.50714e+06	4.6629e+06	6.41182e+06	6.33495e+06	7.49338e+06	1
High	Master Protein	A1BN54	Alpha actinin 1a [OS=Mus musculus]	0	1041.51	64	50	3131	1	887	102.7	5.48	51341	4850.88	50	50	Pf00307, Pf00435, Pf08726, Pf11971, Pf13499, Pf13833	109711	ENSMUSG00000015143.15	Actn1	2.08852e+08	2.43565e+08	1.98983e+08	2.60717e+08	2.27162e+08	2.35171e+08	1.83284e+08	2.361e+08	8.51338e+07	1.59407e+08	1.2285e+08	1.65852e+08	1	Oxidation [P295; P302; P351]
Medium	Master Protein	A1IGU4	Rho guanine nucleotide exchange factor 37 [OS=Mus musculus]	0.024	1.482	3	1	14	1	676	76.5	5.9	0	2.06	1	1	Pf00018, Pf00621, Pf03114, Pf07653, Pf08239, Pf14604	328967		Arhgef37	3.51806e+07	4.38032e+07	4.2218e+07	4.17985e+07	5.86138e+07	6.21079e+07	30873772	42460660	18062726	25556348	31698628	43801084	1
High	Master Protein	A1L2Z3	C230096C10Rik protein [OS=Mus musculus]	0	85.059	13	8	84	8	997	111.6	7.43	870	109.24	7	8	Pf07774, Pf13360	230866		Emc1	7.52911e+06	8.65059e+06	8.23094e+06	7.68767e+06	7.82041e+06	5.83481e+06	6.60739e+06	8.38546e+06	3.52156e+06	4.70038e+06	4.22931e+06	4.11495e+06	1
High	Master Protein	A1L3C2	Polr1c protein [OS=Mus musculus]	0	30.714	16	4	67	4	347	39.2	5.21	1290	93.8	4	4	Pf01000, Pf01193	20016		Polr1c	2.26541e+06	2.08768e+06	2.87874e+06	3.53084e+06	2.85466e+06	2.89453e+06	1.98807e+06	2.02369e+06	1.23165e+06	2.15882e+06	1.54381e+06	2.04134e+06	1	Oxidation [P86]
High	Master Protein	A1L3S3	RNA binding motif protein 4 [OS=Mus musculus]	0	42.096	20	4	48	4	361	40	7.06	885	66.86	4	4	Pf00076, Pf00098, Pf13893, Pf14259	19653		Rbm4	1.84614e+06	1.94134e+06	2.34851e+06	2.48037e+06	1.533e+06	2.56319e+06	1.62014e+06	1.88184e+06	1.0048e+06	1.51654e+06	829051	1.80767e+06	1
High	Master Protein	A2A401	Wilms tumor protein homolog [OS=Mus musculus]	0.002	3.061	2	1	12	1	406	44.4	9.14	18	7.02	1	1	Pf00096, Pf02165, Pf13465	22431	ENSMUSG00000016458.14	Wt1	363443	544857	563803	610313	581398	572229	318950	528157	241220	373157	314423	403559	1
High	Master Protein	A2A432-1	Cullin-4B [OS=Mus musculus]	0	105.001	15	14	206	9	970	110.6	8.37	1942	185.24	14	14	Pf00888, Pf10557	72584	ENSMUSG00000031095.15	Cul4b	1.42138e+07	1.57122e+07	1.57787e+07	1.66198e+07	1.55136e+07	1.46828e+07	1.24737e+07	1.52306e+07	6.75081e+06	1.01617e+07	8.38985e+06	1.03549e+07	1
High	Master Protein	A2A484	Zinc finger, MYND-type-containing 8 [OS=Mus musculus]	0	42.326	6	7	30	7	1235	136.9	7.52	281	22.48	7	7	Pf00439, Pf00628, Pf00855, Pf01753, Pf12064	228880	ENSMUSG00000039671.18	Zmynd8	2.37107e+06	2.34203e+06	2.99657e+06	3.40827e+06	3.14059e+06	3.50678e+06	2.0808e+06	2.27025e+06	1.28206e+06	2.08388e+06	1.69845e+06	2.47313e+06	1
High	Master Protein	A2A513	Keratin, type I cytoskeletal 10 [OS=Mus musculus]	0	88.7	14	9	345	7	561	57	5.07	4765	446.9	9	9	Pf00038	16661	ENSMUSG00000019761.10	Krt10	1.19655e+08	8.47311e+07	3.5664e+08	6.98497e+07	7.52515e+07	3.87974e+07	1.05007e+08	8.21342e+07	1.52586e+08	4.27074e+07	4.06964e+07	2.73615e+07	1
High	Master Protein	A2A5R2	Brefeldin A-inhibited guanine nucleotide-exchange protein 2 [OS=Mus musculus]	0	11.775	1	2	8	2	1792	202.1	6.55	73	7.09	2	2	Pf01369, Pf09324, Pf12783	99371	ENSMUSG00000074582.10	Arfgef2	339044	467374	366216	393024	480944	354351	297538	453049	156683	240302	260097	249903	1
High	Master Protein	A2A5V2	SH3 domain-binding protein 1 [OS=Mus musculus]	0	7.26	3	2	13	2	584	64.7	5.67	20	4.98	2	2	Pf00620, Pf03114	20401	ENSMUSG00000022436.15	Sh3bp1	931102	1.03729e+06	846930	322136	350000	677672	817116	1.0055e+06	362354	196960	189282	477922	1
High	Master Protein	A2A699	Protein FAM171A2 [OS=Mus musculus]	0	8.263	3	2	6	1	822	87.4	8.05	31	2.28	2	2	Pf10577	217219	ENSMUSG00000034685.4	Fam171a2	93458.6	122584		165708	93922.6	116039	82017.4	118827		101317	50793.8	81835.2	1
High	Master Protein	A2A6Q5	cell division cycle protein 27 homolog [OS=Mus musculus]	0	3.942	1	1	10	1	825	91.8	7.02	19	0	1	1	Pf00515, Pf07719, Pf12895, Pf13181, Pf13414, Pf13424, Pf13431, Pf13432, Pf14559	217232	ENSMUSG00000020687.13	Cdc27	205822	245573		192911	133732	170500	180625	238046		117949	72322.6	120244	1
High	Master Protein	A2A6T4	Immature colon carcinoma transcript 1, isoform CRA_c [OS=Mus musculus]	0	15.206	16	2	21	2	186	21.3	10.21	37	6.06	2	2	Pf00472	68572	ENSMUSG00000018858.15	Ict1; Mrpl58		1.28995e+06	900054	1.05711e+06		1.37592e+06		1.25041e+06	385083	646339		970358	1
High	Master Protein	A2A791	Zinc finger MYM-type protein 4 [OS=Mus musculus]	0	5.203	2	2	16	2	1549	172.3	6.8	62	0	2	2	Pf06467, Pf12012	67785	ENSMUSG00000042446.16	Zmym4	197219	266867	477874	228370	334381	252997	173075	258688	204456	139629	180835	178424	1
High	Master Protein	A2A842	protein 4.1 [OS=Mus musculus]	0	104.893	21	11	85	10	769	85.6	5.39	546	86.7	11	11	Pf00373, Pf04382, Pf05902, Pf08736, Pf09380	269587	ENSMUSG00000028906.16	Epb4.1; Epb41	1.43362e+07	9.18322e+06	8.92574e+06	9.31889e+06	9.0715e+06	9.29266e+06	1.25812e+07	8.90176e+06	3.81882e+06	5.69774e+06	4.90591e+06	6.55357e+06	1
High	Master Protein	A2A8L5	Receptor-type tyrosine-protein phosphatase F [OS=Mus musculus]	0	12.892	2	3	22	1	1898	211.4	6.65	149	17.53	3	3	Pf00041, Pf00047, Pf00102, Pf07679, Pf09294, Pf13895, Pf13927, Pf14566	19268	ENSMUSG00000033295.13	Ptprf	980272	1.63749e+06	1.36856e+06	1.69948e+06	1.88519e+06	1.75894e+06	860267	1.58731e+06	585529	1.03909e+06	1.01952e+06	1.24048e+06	1
High	Master Protein	A2A9C3-1	KICSTOR complex protein SZT2 [OS=Mus musculus]	0	5.42	0	1	52	1	3431	377.4	6.19	18	18.73	1	1		230676	ENSMUSG00000033253.18	Szt2	2.84289e+06	3.64206e+06	3.20151e+06	3.17355e+06	3.34948e+06	4.11764e+06	2.49487e+06	3.53043e+06	1.36975e+06	1940367	1811416	2.90393e+06	1
High	Master Protein	A2A9M4	Dedicator of cytokinesis protein 7 [OS=Mus musculus]	0	181.922	15	22	218	22	2130	241.3	6.76	1481	222.3	22	21	Pf06920, Pf11878, Pf14429	67299	ENSMUSG00000028556.15	Dock7	1.16783e+07	1.00709e+07	9.30008e+06	1.384e+07	1.01378e+07	1.4558e+07	1.02486e+07	9.76225e+06	3.97899e+06	8.462e+06	5.48258e+06	1.02669e+07	1
High	Master Protein	A2A9X5	5'(3')-deoxyribonucleotidase, cytosolic type [OS=Mus musculus]	0	15.2	9	1	12	1	194	21.9	5.33	63	20.25	1	1	Pf06941, Pf13419	50773	ENSMUSG00000020736.12	Nt5c	525411	602499	529994	455463	481993	500559	461090	584032	226755	278478	260664	353015	1
High	Master Protein	A2ABV5	Mediator of RNA polymerase II transcription subunit 14 [OS=Mus musculus]	0	9.894	2	1	6	1	1459	160.9	8.53	22	3.09	1	1	Pf08638, Pf15449	26896	ENSMUSG00000064127.13	Med14	163159	347488	260470	262028	259808	234664	143185	336838	111441	160208	140506	165495	1
High	Master Protein	A2ACZ1	Probable rRNA-processing protein EBP2 [OS=Mus musculus]	0	9.808	10	1	4	1	186	21.6	9.82	14	0	1	1	Pf05890		ENSMUSG00000028729.15		390506	238022	338072	313956	649498	696227	342700	230726	144642	191958	351252	491008	1
Medium	Master Protein	A2ADF7	Solute carrier family 25 member 34 [OS=Mus musculus]	0.039	1.04	4	1	2	1	318	33.8	9.03	0		1		Pf00153	384071	ENSMUSG00000040740.7	Slc25a34	4.29344e+06	3.51641e+06	1.65688e+06	3.91123e+06	8.45548e+06	7.76883e+06	3.76784e+06	3.40863e+06	708887	2.3914e+06	4572764	5478901	1
High	Master Protein	A2ADH1	Magnesium transporter protein 1 [OS=Mus musculus]	0	33.128	11	4	56	4	368	41.6	10.05	390	66.33	4	4	Pf04756	67075	ENSMUSG00000031232.16	Magt1	8.71215e+06	8.59565e+06	9.52925e+06	9.96977e+06	1.08868e+07	1.16456e+07	7.64561e+06	8.3322e+06	4.07703e+06	6.0957e+06	5.88765e+06	8.21295e+06	1
High	Master Protein	A2ADY9	Protein DDI1 homolog 2 [OS=Mus musculus]	0	36.072	11	2	36	2	399	44.6	5.05	283	38.63	2	2	Pf00077, Pf00240, Pf08284, Pf09668, Pf13650, Pf13975	68817	ENSMUSG00000078515.4	Ddi2	689913	874392	800063	895563	1.00299e+06	619437	605453	847593	342302	547563	542424	436852	1	Oxidation [P122]
High	Master Protein	A2AE27	AMP deaminase [OS=Mus musculus]	0	42.958	8	7	75	7	824	94.6	6.51	385	56.51	7	7	Pf00962	109674	ENSMUSG00000027889.17	Ampd2	3.30379e+06	3.87953e+06	3.20241e+06	3.51393e+06	3.72128e+06	3.07626e+06	2.89934e+06	3.76062e+06	1.37013e+06	2.14848e+06	2.01249e+06	2.16951e+06	1
High	Master Protein	A2AER8	Polyglutamine-binding protein 1 [OS=Mus musculus]	0.008	2.161	4	1	1	1	236	27.6	5.91	19		1		Pf00397	54633	ENSMUSG00000031157.10	Pqbp1	341302	309891	308018	321469	345817	314745	299520	300393	131784	196552	187020	221971	1
High	Master Protein	A2AEX6	Four and a half LIM domains protein 1 [OS=Mus musculus]	0	153.665	46	10	235	10	309	35.1	8.44	2296	322.12	10	10	Pf00412	14199	ENSMUSG00000023092.16	Fhl1	1.06454e+07	1.46587e+07	1.06492e+07	1.31301e+07	1.73884e+07	2.01334e+07	9.34215e+06	1.42095e+07	4.5562e+06	8.02796e+06	9.40371e+06	1.41989e+07	1
High	Master Protein	A2AF65	dedicator of cytokinesis protein 11 [OS=Mus musculus]	0	9.256	3	2	19	1	527	61	7.85	50	11.33	2	2	Pf06920	75974	ENSMUSG00000031093.14	Dock11	276281	287905	322511	324655	301694	253845	242458	279081	137985	198500	163157	179022	1
High	Master Protein	A2AFR3	FERM and PDZ domain-containing protein 4 [OS=Mus musculus]	0.006	2.262	1	2	3	2	1320	144.9	5.25	0		2		Pf00373, Pf00397, Pf00595, Pf13180	333605	ENSMUSG00000049176.14	Frmpd4	2.96494e+06	2.8468e+06	3.29884e+06	2.37748e+06	2.11158e+06	2.51117e+06	2.60197e+06	2.75955e+06	1.41139e+06	1453634	1.14195e+06	1.77098e+06	1	Oxidation [P294]
High	Master Protein	A2AFW6	Mitochondrial carrier homolog 2 [OS=Mus musculus]	0	119.434	41	10	210	1	294	32.3	8.51	1954	261.43	10	10	Pf00153	56428	ENSMUSG00000027282.17; ENSMUSG00000111714.1	Mtch2	2.65648e+07	4.4093e+07	2.61471e+07	3.63524e+07	3.92505e+07	4.23451e+07	2.33127e+07	4.27416e+07	1.11869e+07	2.22265e+07	2.12268e+07	2.98635e+07	1
High	Master Protein	A2AGT5	Cytoskeleton-associated protein 5 [OS=Mus musculus]	0	154.954	12	18	177	18	2032	225.5	7.96	1563	183.61	18	17		75786		Ckap5	1.30086e+07	1.2567e+07	1.53626e+07	1.45471e+07	1.28564e+07	1.12578e+07	1.14161e+07	1.21818e+07	6.57279e+06	8.89437e+06	6.95282e+06	7.93945e+06	1
Medium	Master Protein	A2AHJ7	diacylglycerol kinase [OS=Mus musculus]	0.011	1.95	2	1	5	1	946	105.8	8.07	0	0	1	1	Pf00023, Pf00130, Pf00609, Pf00781, Pf12796, Pf13637, Pf13857	104418	ENSMUSG00000040479.11	Dgkz	313794	346781	233977	276350	257382	303304	275379	336152	100106	168966	139193	213902	1
High	Master Protein	A2AI52	ubiquitin carboxyl-terminal hydrolase 8 [OS=Mus musculus]	0	19.246	3	2	16	2	1091	123.8	8.54	131	10.87	2	2	Pf00443, Pf00581, Pf08969, Pf13423	84092	ENSMUSG00000027363.15	Usp8	476879	470299	472534	493974	506687	462118	418499	455885	202171	302025	274018	325905	1
High	Master Protein	A2AIV2-1	protein virilizer homolog [OS=Mus musculus]	0	16.244	1	2	27	2	1811	201.3	4.96	92	20.04	2	2		66185	ENSMUSG00000040720.15	1110037F02Rik; Virma	892362	1.0984e+06	1.02782e+06	1.16056e+06	944954	912984	783118	1.06474e+06	439747	709587	511035	643874	1
High	Master Protein	A2AIX1	Protein transport protein Sec16 [OS=Mus musculus]	0	47.568	4	6	41	6	2377	256.3	5.87	242	39.85	6	6	Pf10697, Pf12931, Pf12932	227648	ENSMUSG00000026924.17	Sec16a	4.13666e+06	3.44409e+06	3.94269e+06	3.83883e+06	4.0842e+06	4.20096e+06	3.63024e+06	3.33853e+06	1.68686e+06	2.34713e+06	2.20875e+06	2.96269e+06	1	Oxidation [P2191]
High	Master Protein	A2AJ28	chloride intracellular channel protein [OS=Mus musculus]	0.006	2.388	9	1	19	1	235	26.6	6.28	0	8.48	1	1	Pf13409, Pf13410, Pf13417	69454	ENSMUSG00000015093.15	Clic3	2.15e+06	1.38515e+06	2.32061e+06	1.96051e+06	2.18188e+06	1.63112e+06	1.8868e+06	1.3427e+06	992862	1.19869e+06	1.17997e+06	1.15033e+06	1	Oxidation [P219; P230; P234]
High	Master Protein	A2AJ72	Far upstream element (FUSE)-binding protein 3 [OS=Mus musculus]	0	334.07	59	26	849	24	569	61.4	8.28	9713	984.42	26	26	Pf00013, Pf07650, Pf13014	320267	ENSMUSG00000026843.15	Fubp3	6.86269e+07	7.04813e+07	7.15652e+07	8.75064e+07	7.59296e+07	7.30907e+07	6.02256e+07	6.83211e+07	3.06188e+07	5.3503e+07	4.10631e+07	5.15466e+07	1	Oxidation [P152]
High	Master Protein	A2AJG0	Ribonuclease P protein subunit p38 [OS=Mus musculus]	0	5.806	9	2	26	2	280	31.2	9.73	129	5.14	2	2	Pf01248	227522	ENSMUSG00000049950.6	Rpp38	462571	637438	630423	607247	467227	608819	405943	617901	269723	371282	252678	429364	1
High	Master Protein	A2AJI1	MAP7 domain-containing protein 1 [OS=Mus musculus]	0.003	2.795	1	1	13	1	774	85.7	9.95	0	19.48	1	1		245877	ENSMUSG00000028849.17	Map7d1; Mtap7d1	8.44502e+06	8.88083e+06	3.21233e+06	1.01507e+07	8.65799e+06	1.14871e+07	7411176	8608640	1.37437e+06	6206320	4682282	8.10116e+06	1	Oxidation [P374]
High	Master Protein	A2AJL4	FGGY carbohydrate kinase domain-containing protein [OS=Mus musculus]	0	8.755	4	2	10	2	464	50.3	6.16	60	7.9	2	2	Pf00370, Pf02782	75578	ENSMUSG00000028573.18	Fggy	614043	1.30062e+06	556052	616141	945935	1.03191e+06	538872	1.26076e+06	237904	376720	511566	727742	1
High	Master Protein	A2AKI5	Integrin alpha-V [OS=Mus musculus]	0	47.413	9	7	38	7	1008	111.4	5.67	377	35.57	7	7	Pf01839, Pf08441, Pf13517	16410	ENSMUSG00000027087.11	Itgav	2.48396e+06	3.76267e+06	3.66526e+06	3.30848e+06	4.93093e+06	4.30391e+06	2.17988e+06	3.64734e+06	1568160	2.02287e+06	2.66667e+06	3.03529e+06	1
High	Master Protein	A2AL50	Alkylglycerone-phosphate synthase [OS=Mus musculus]	0	77.622	15	7	104	7	671	74.3	7.66	1134	135.62	7	7	Pf01565, Pf02913	228061	ENSMUSG00000042410.15	Agps	6.12186e+06	6.15337e+06	8.71245e+06	8.34874e+06	6.64906e+06	7.93708e+06	5.37242e+06	5.96478e+06	3.72757e+06	5.10457e+06	3.59584e+06	5.59756e+06	1
High	Master Protein	A2AMH4	choline transporter-like protein 1 [OS=Mus musculus]	0	26.951	4	2	32	2	718	80	8.22	626	46.37	2	2	Pf04515	100434	ENSMUSG00000028412.17	Slc44a1	334485	334775	263228	304606	348432	409242	293537	324514	112621	186242	188433	288614	1
High	Master Protein	A2AMS3	Galactose-1-phosphate uridylyltransferase [OS=Mus musculus]	0	14.063	6	2	20	2	360	41.2	7.03	122	23.33	2	2	Pf01087, Pf02744	14430	ENSMUSG00000036073.17	Galt	538861	763942	521174	502273	562079	560950	472893	740528	222981	307099	303975	395605	1
High	Master Protein	A2AMW0	Capping protein (Actin filament) muscle Z-line, beta, isoform CRA_a [OS=Mus musculus]	0	242.419	60	16	672	16	260	29.3	6.92	10799	1010.16	16	16	Pf01115	12345	ENSMUSG00000028745.18	Capzb	9.51517e+07	8.76376e+07	7.63482e+07	8.98537e+07	8.55734e+07	9.38345e+07	8.35032e+07	8.49515e+07	3.26651e+07	5.49382e+07	4.62785e+07	6.61759e+07	1	Oxidation [K187]
High	Master Protein	A2AN08	e3 ubiquitin-protein ligase UBR4 [OS=Mus musculus]	0	191.692	8	30	257	30	5180	571.9	6.06	1620	255.1	30	30	Pf02207, Pf13764	69116	ENSMUSG00000066036.14	Ubr4	1.67954e+07	1.83205e+07	1.75362e+07	1.85724e+07	1.80187e+07	1.75316e+07	1.47393e+07	1.7759e+07	7.50276e+06	1.13555e+07	9.74458e+06	1.2364e+07	1
Medium	Master Protein	A2AP29	Probable ATP-dependent RNA helicase DDX58 [OS=Mus musculus]	0.017	1.669	1	1	4	1	707	80.1	5.78	0	0	1	1	Pf00270, Pf00271, Pf04851	230073	ENSMUSG00000040296.15	Ddx58	190411	268063	191851	205968	337013	307577	167101	259847	82082.3	125933	182258	216916	1
High	Master Protein	A2AP78	High mobility group protein B3 [OS=Mus musculus]	0	54.13	35	5	105	5	159	18.3	9.77	1233	129.75	5	4	Pf00505, Pf09011	15354	ENSMUSG00000015217.11	Hmgb3	4.2859e+06	5.17747e+06	6.69641e+06	6.76681e+06	5.49272e+06	5.28358e+06	3.76122e+06	5.01879e+06	2.86502e+06	4.13735e+06	2.97049e+06	3.7262e+06	1
High	Master Protein	A2AP82	Transcription initiation factor TFIID subunit 9B [OS=Mus musculus]	0	7.501	3	1	4	1	293	32	5.43	49	3.96	1	1	Pf02291, Pf15630	407786	ENSMUSG00000047242.14	Taf9b	403121	404830	415407	536775	492494	572971	353771	392422	177729	328194	266343	404083	1
High	Master Protein	A2APY7-1	Arginine-hydroxylase NDUFAF5, mitochondrial [OS=Mus musculus]	0.006	2.225	2	1	5	1	343	38.4	6.1	0	1.62	1	1	Pf01209, Pf01728, Pf03291, Pf08241, Pf08242, Pf12847, Pf13489, Pf13649, Pf13659, Pf13847	69487	ENSMUSG00000027384.6	Ndufaf5	233991	345444	170115	161396	198496	285032	205346	334856	72782.8	98680.3	107347	201016	1
High	Master Protein	A2AQ19	RNA polymerase-associated protein RTF1 homolog [OS=Mus musculus]	0	7.385	2	1	2	1	715	80.7	8.16	61	2.31	1	1	Pf03126	76246	ENSMUSG00000027304.9	Rtf1	497684	740853	869571	717977	713511	707974	436757	718146	372041	438984	385870	499292	1
High	Master Protein	A2AQ25-1	Sickle tail protein [OS=Mus musculus]	0	42.704	5	7	56	7	1946	212.9	7.77	393	46.89	7	7		208618	ENSMUSG00000036617.16	Etl4	1.67263e+06	2.91802e+06	2.68705e+06	3.11101e+06	2.66808e+06	4.15436e+06	1.46786e+06	2.82858e+06	1.14964e+06	1.90213e+06	1.44291e+06	2.92982e+06	1	Oxidation [P337]
High	Master Protein	A2AQ51	solute carrier family 12 member 1 [OS=Mus musculus]	0	139.073	16	14	295	13	1090	119.7	7.74	2118	300.08	14	14	Pf00324, Pf08403, Pf13520	20495	ENSMUSG00000027202.12	Slc12a1	1.57339e+07	2.65803e+07	1.94709e+07	1.78307e+07	2.8381e+07	2.711e+07	1.38077e+07	2.57656e+07	8.33051e+06	1.0902e+07	1.53486e+07	1.91191e+07	1	Oxidation [K764]
High	Master Protein	A2AQA7	Intron-binding protein aquarius [OS=Mus musculus]	0	141.006	14	16	178	16	1400	161.8	7.17	1037	186.78	16	15	Pf04851, Pf13086, Pf13087, Pf13245, Pf13538	11834	ENSMUSG00000040383.16	Aqr	7.52903e+06	9.28176e+06	7.80637e+06	9.85759e+06	8.7135e+06	8.05949e+06	6.60732e+06	8.99728e+06	3.33991e+06	6.02711e+06	4.7123e+06	5.68389e+06	1
High	Master Protein	A2ARA8-1	Integrin alpha-8 [OS=Mus musculus]	0	6.151	2	2	6	2	1062	117.5	6.16	20	1.65	2	2	Pf00357, Pf01839, Pf08441, Pf13517	241226	ENSMUSG00000026768.10	Itga8	972309	1.24625e+06	953470	708179	932131	923428	853278	1.20805e+06	407937	432994	504101	651239	1
High	Master Protein	A2ARV4	Low-density lipoprotein receptor-related protein 2 [OS=Mus musculus]	0	1617.17	33	123	3422	123	4660	518.9	5.15	46436	4676.05	123	123	Pf00057, Pf00058, Pf07645, Pf12662, Pf14670	14725	ENSMUSG00000027070.14	Lrp2	4.39364e+08	7.50342e+08	4.73814e+08	4.94908e+08	7.07684e+08	6.09329e+08	3.85577e+08	7.27345e+08	2.02718e+08	3.02596e+08	3.82719e+08	4.29724e+08	1	Oxidation [P442; P4571; P4573; K4574]
Medium	Master Protein	A2AS47	Plakophilin-4 [OS=Mus musculus]	0.027	1.395	1	1	3	1	849	95.2	8.76	0	0	1	1	Pf00514, Pf13646	227937	ENSMUSG00000026991.20	Pkp4	115329	169508	126160	176928	178355	215864	101210	164313	53976.6	108177	96455.2	152236	1
High	Master Protein	A2AT37	UPF2 regulator of nonsense transcripts homolog (yeast) [OS=Mus musculus]	0	4.493	1	2	14	2	1269	147.5	5.64	0	0	2	2	Pf02854, Pf04050	326622	ENSMUSG00000043241.14	Upf2	978448	1.06968e+06	1.02062e+06	1.01841e+06	996116	959866	858666	1.03689e+06	436666	622677	538704	676937	1
High	Master Protein	A2ATL0	family with sequence similarity 171, member A1 [OS=Mus musculus]	0	7.09	5	3	11	2	887	97.2	6.1	21	0	3	3	Pf10577	269233	ENSMUSG00000050530.14	Fam171a1	331375	288534	452644	392437	342531	448892	290808	279690	193661	239943	185242	316577	1
High	Master Protein	A2ATT5	ADP-sugar pyrophosphatase [OS=Mus musculus]	0	26.132	16	2	40	2	161	17.7	5.4	456	53.72	2	2	Pf00293	53893	ENSMUSG00000025817.12	Nudt5	602896	646080	663571	727127	920880	728722	529089	626278	283905	444578	498016	513925	1
High	Master Protein	A2AUE1	DnaJ homolog subfamily C member 5 [OS=Mus musculus]	0	15.2	11	1	6	1	141	15.8	7.85	118	12.98	1	1	Pf00226	13002	ENSMUSG00000000826.16	Dnajc5	979966	1.17609e+06	776177	1.34158e+06	1.62614e+06	1.75342e+06	859998	1.14005e+06	332083	820265	879422	1.23658e+06	1
High	Master Protein	A2AUM6	Signal recognition particle 14 kDa protein [OS=Mus musculus]	0	4.18	12	1	8	1	97	11.2	10.39	0	1.71	1	1	Pf02290	20813	ENSMUSG00000009549.14	Srp14	309079	341155	397638	365594	321762	402925	271241	330699	170127	223531	174010	284160	1
High	Master Protein	A2AUP6	DENN domain-containing protein 1A [OS=Mus musculus]	0	4.832	11	1	12	1	105	11.7	4.88	64	5.95	1	1		227801	ENSMUSG00000035392.17	Dennd1a	516465	485038	578072		482433	399127	453239	470172	247325		260902	281481	1
High	Master Protein	A2AV19	Exosome complex component Rrp4 [OS=Mus musculus]	0	28.317	15	3	33	3	247	27.3	8.16	447	38.25	3	3	Pf14382	227715	ENSMUSG00000039356.15	Exosc2	1.6608e+06	1.91171e+06	1.85014e+06	2.29125e+06	2.12619e+06	2.14085e+06	1.45748e+06	1.85312e+06	791571	1.40091e+06	1.14985e+06	1.50982e+06	1
High	Master Protein	A2AVJ7	Ribosome-binding protein 1 [OS=Mus musculus]	0	341.376	29	32	447	8	1464	158.3	9.19	4966	653.25	31	32	Pf00038, Pf03276, Pf03962, Pf04111, Pf04156, Pf05104, Pf08317, Pf09606, Pf09726, Pf10186, Pf12128, Pf13779	81910	ENSMUSG00000027422.15	Rrbp1	5.24338e+07	4.94803e+07	4.87626e+07	5.09873e+07	5.42072e+07	4.92617e+07	4.60148e+07	4.79637e+07	2.08628e+07	3.11746e+07	2.93155e+07	3.47414e+07	1	Oxidation [P125]
High	Master Protein	A2AVR9	Dynein light chain roadblock [OS=Mus musculus]	0	9.782	12	1	8	1	104	11.9	6.06	150	10.69	1	1	Pf03259	67068	ENSMUSG00000047459.14	Dynlrb1	557224	608621	865017	640670	781549	1.15172e+06	489008	589967	370092	391717	422665	812238	1
High	Master Protein	A2AWA9	Rab GTPase-activating protein 1 [OS=Mus musculus]	0	8.397	3	3	14	3	1064	120.7	5.25	33	5.13	3	3	Pf00566, Pf00640, Pf00769, Pf01576, Pf02463, Pf05103, Pf05266, Pf06160, Pf10174, Pf10473, Pf12128, Pf12473, Pf13514, Pf13851, Pf13868, Pf13870, Pf14943	227800	ENSMUSG00000035437.15	Rabgap1	883273	917885	857215	1.01614e+06	1.06768e+06	936626	775142	889752	366755	621289	577408	660547	1
High	Master Protein	A2AWI7	Endophilin-B2 [OS=Mus musculus]	0	9.479	6	2	9	2	404	44.9	5.58	90	8.42	2	2	Pf03114, Pf14604	227700	ENSMUSG00000026860.16	Sh3glb2	299168	354564	292772	351091			262544	343696	125261	214663			1
High	Master Protein	A2BDX3	Adenylyltransferase and sulfurtransferase MOCS3 [OS=Mus musculus]	0.003	2.945	2	1	131	1	460	49.3	7.49	1085	63.08	1	1	Pf00581, Pf00899, Pf05237	69372	ENSMUSG00000074576.4	Mocs3	753139	755371	926628	801097	822341	980011	660939	732219	396452	489805	444726	691144	1
High	Master Protein	A2BE28	Ribosomal biogenesis protein LAS1L [OS=Mus musculus]	0	31.401	8	6	60	6	776	89.4	4.44	280	44.14	6	6	Pf04031	76130	ENSMUSG00000057421.12	Las1l	3.0245e+06	3.27239e+06	2.86643e+06	3.87799e+06	3.3722e+06	3.47428e+06	2.65424e+06	3.17209e+06	1.22638e+06	2.37107e+06	1.8237e+06	2.4502e+06	1
High	Master Protein	A2BH40	AT-rich interactive domain-containing protein 1A [OS=Mus musculus]	0	143.116	7	11	222	10	2283	241.9	6.68	2100	236.4	11	11	Pf01388, Pf12031	93760	ENSMUSG00000007880.16	Arid1a	9.6773e+06	9.82871e+06	1.05593e+07	1.06214e+07	8.54202e+06	1.06265e+07	8.4926e+06	9.52747e+06	4.51775e+06	6.49409e+06	4.61956e+06	7.49428e+06	1
Medium	Master Protein	A2BI93	synovial sarcoma, X member B9 [OS=Mus musculus]	0.016	1.686	8	1	4	1	185	21.6	4.83	0	0	1	1	Pf01352, Pf09514	387131	ENSMUSG00000068218.6	Ssxb9	401776	596499	381586	700287	238155	665642	352590	578217	163259	428168	128795	469438	1	Oxidation [P26; P33; K34]
High	Master Protein	A2CG35	Ras-related protein Rab-12 [OS=Mus musculus]	0	15.398	10	3	20	2	291	32.2	8.84	14	35.6	2	3	Pf00025, Pf00071, Pf01926, Pf08477	19328	ENSMUSG00000023460.12	Rab12	407318	175071	409479	128124	301312	131650	357454	169705	175193	78337.5	162951	92845.3	1
High	Master Protein	A2CG76	Histone-lysine N-methyltransferase EHMT2 [OS=Mus musculus]	0	3.735	1	1	8	1	1229	134.6	5.96	0	4.29	1	1	Pf00023, Pf00856, Pf05033, Pf12796, Pf13606, Pf13637, Pf13857	110147	ENSMUSG00000013787.15	Ehmt2	233351	242575	228662	260503	202060	222821	204784	235140	97831.8	159276	109275	157142	1
High	Master Protein	A2KFE9	immunglobulin light chain variable region [OS=Mus musculus]	0	4.763	6	1	3	1	143	15.4	7.97	42	1.79	1	1	Pf07686	385120		Igkv4-70	500974	623738	554978	521535	731808		439644	604621	237444	318876	395765		1
High	Master Protein	A2NMA3	Anti-carcinoma embryonic antigen light chain variable region [OS=Mus musculus]	0.002	3.015	12	1	2	1	107	11.6	7.28	15	0	1	1	Pf00047, Pf07679, Pf07686, Pf13927				334627	191923	363688	369025	242814	476323	293662	186041	155602	225629	131315	335923	1
High	Master Protein	A2NVE9	Immnuoglobulin kappa light chain [OS=Mus musculus]	0	15.2	19	1	4	1	108	11.9	7.12	21	7.89	1	1	Pf00047, Pf07679, Pf07686				682591	869421	810488	767793	623054	546202	599027	842774	346763	469442	336950	385204	1
High	Master Protein	A2RSP9	RECK protein [OS=Mus musculus]	0	13.953	4	2	14	2	971	106	6.65	270	12.55	2	2	Pf14828	53614		Reck	288218	221199	420522	228522	295069	230192	252934	214419	179918	139722	159575	162341	1
High	Master Protein	A2TJV2	Paralemmin-3 [OS=Mus musculus]	0.003	2.954	3	2	4	2	734	78.7	4.5	0	0	2	2		74337	ENSMUSG00000047986.12	Palm3	143060	192048	97972.7	154248	326560	245345	125547	186162	41917	94309.9	176605	173028	1
High	Master Protein	A2VCS1	mCG2852, isoform CRA_a [OS=Mus musculus]	0	7.938	20	2	6	2	113	12.9	5.86	15	0	2	2	Pf00338	52443		Mrpl48	500285	789115	312787	499319	555630	776475	439040	764929	133824	305293	300487	547602	1
High	Master Protein	A2VDG1	Eif2c1 protein [OS=Mus musculus]	0	42.211	7	5	80	2	855	96.9	9.19	552	80.33	5	5	Pf02170, Pf02171, Pf08699	236511		Ago1; Eif2c1	2.67328e+06	1.72892e+06	3.69255e+06	4.7098e+06	4.20153e+06	3.52952e+06	2.34602e+06	1675932	1.57983e+06	2.87966e+06	2.2722e+06	2489163	1
High	Master Protein	A3KG93	Lysine-specific histone demethylase 1A [OS=Mus musculus]	0	133.223	21	13	166	13	873	94.6	6.25	1707	206.61	13	13	Pf01593, Pf04433, Pf13450	99982	ENSMUSG00000036940.15	Kdm1a	8.05509e+06	9.29916e+06	9.24571e+06	9.35191e+06	7.38998e+06	9.45737e+06	7.06898e+06	9.01415e+06	3.95572e+06	5.71793e+06	3.99653e+06	6.66973e+06	1
High	Master Protein	A3KGR9	histocompatibility 13 [OS=Mus musculus]	0	50.083	18	5	170	3	347	38.2	8.4	1884	181.13	5	5	Pf04258	14950	ENSMUSG00000019188.16	H13	8.72113e+06	8.78177e+06	9.25444e+06	1.05426e+07	1.07314e+07	9.86852e+06	7.65348e+06	8.51261e+06	3.95946e+06	6.44594e+06	5.80359e+06	6.95969e+06	1
High	Master Protein	A3KGU5	Spectrin alpha chain, non-erythrocytic 1 [OS=Mus musculus]	0	1980	58	122	3255	2	2457	282.7	5.33	43395	5004.09	121	121	Pf00018, Pf00036, Pf00435, Pf07653, Pf08239, Pf08726, Pf12128, Pf13405, Pf13499, Pf14604	20740	ENSMUSG00000057738.13	Spna2; Sptan1	4.15037e+08	4.26768e+08	4.25142e+08	4.41149e+08	4.49244e+08	3.84232e+08	3.64228e+08	4.13688e+08	1.81894e+08	2.69726e+08	2.42953e+08	2.70976e+08	1	Oxidation [P772; P962; K2318; K2431]
High	Master Protein	A3KMP2	tetratricopeptide repeat protein 38 [OS=Mus musculus]	0	13.327	8	3	18	3	465	52.2	6.3	89	13.92	3	3		239570	ENSMUSG00000035944.17	Ttc38	1.00669e+06	1.09652e+06	741939	951535	849348	990134	883447	1.06291e+06	317434	581786	459331	698284	1
High	Master Protein	A4FUW1	4932417H02Rik protein [OS=Mus musculus]	0	10.42	2	2	26	2	1333	149.1	6.93	129	18.93	2	2	Pf01602, Pf12717, Pf13646, Pf14538	74370		Rptor	743186	705076	791721	887494	496372	741071	652205	683466	338733	542630	268440	522633	1
High	Master Protein	A6H5Y3	methionine synthase [OS=Mus musculus]	0	6.966	2	2	9	2	1253	139	5.57	24	5.66	2	2	Pf00809, Pf02310, Pf02574, Pf02607, Pf02965	238505	ENSMUSG00000021311.8	Mtr	387487	1.38088e+06	351469	387347	392820	421747	340050	1.33856e+06	150374	236831	212439	297434	1
High	Master Protein	A6H6A4-1	Leucine-rich repeat and IQ domain-containing protein 4 [OS=Mus musculus]	0	3.814	2	1	14	1	596	68	8.16	60	3.47	1	1	Pf12799, Pf13855	68307	ENSMUSG00000027703.16	Lrriq4	1.86515e+06	1.48432e+06	1.7164e+06	1.66292e+06	1.43712e+06	1.29658e+06	1.63682e+06	1.43882e+06	734352	1.01674e+06	777202	914401	1
Medium	Master Protein	A6H6A9	rab GTPase-activating protein 1-like [OS=Mus musculus]	0.028	1.351	1	1	5	1	815	92.3	5.31	0	0	1	1	Pf00566, Pf00640, Pf12473	29809	ENSMUSG00000026721.15	Rabgap1l	423945	462030	463388	36723.8	283652	356602	372046	447869	198258	22453.6	153400	251491	1
Medium	Master Protein	A6H6E2	Multimerin-2 [OS=Mus musculus]	0.024	1.486	2	1	1	1	943	105.1	5.57	0		1		Pf00386, Pf07546	105450	ENSMUSG00000041445.8	Mmrn2	116553	157605	181291	124190		221982	102285	152774	77564.4	75931.9		156551	1
High	Master Protein	A6PW47	Mediator of RNA polymerase II transcription subunit 24 [OS=Mus musculus]	0	5.941	2	2	10	2	1006	111.8	6.92	20	0	2	2	Pf11277	23989	ENSMUSG00000017210.14	Med24	538844	749957	577167	709439	578365	529421	472878	726972	246937	433764	312782	373369	1
High	Master Protein	A6PWX8	Ubiquinol-cytochrome-c reductase complex assembly factor 1 [OS=Mus musculus]	0	3.907	7	1	11	1	262	30.3	8.22	0	4.51	1	1	Pf03981	56046	ENSMUSG00000005882.18	Uqcc; Uqcc1	811608	937217	775754	919732	1.05604e+06	1.06171e+06	712250	908492	331902	562340	571110	748763	1
Medium	Master Protein	A6X8Z5	Rho GTPase-activating protein 31 [OS=Mus musculus]	0.03	1.276	1	1	6	1	1425	155.2	5.77	0	0	1	1	Pf00620	12549	ENSMUSG00000022799.4	Arhgap31	336222	402702	433028	540393	549312	502213	295062	390359	185268	330406	297070	354182	1
High	Master Protein	A7E215	Rps6ka3 protein [OS=Mus musculus]	0	172.696	27	18	245	10	741	83.6	6.89	1786	280.23	17	18	Pf00069, Pf00433, Pf07714, Pf14531	110651		Rps6ka3	2.65492e+07	3.22085e+07	2.56069e+07	2.78167e+07	2.97526e+07	2.78917e+07	2.3299e+07	3.12213e+07	1.09558e+07	1.70076e+07	1.60903e+07	1.96704e+07	1
High	Master Protein	A7UKX1	Claudin [OS=Mus musculus]	0	12.589	7	1	2	1	211	22.9	7.91	40	3.44	1	1	Pf00822	12737		Cldn1	1.27155e+06	1.43619e+06	1.80028e+06	1.76647e+06	2.11312e+06	2.26138e+06	1.11588e+06	1.39218e+06	770240	1.08005e+06	1.14279e+06	1.59482e+06	1
High	Master Protein	A7UQY4	Uncharacterized protein [OS=Mus musculus]	0	159.241	35	14	203	14	530	57.1	9.16	2626	280.93	14	14	Pf00076, Pf11608, Pf13893, Pf14259	17876		Myef2	3.53537e+07	2.86894e+07	3.05488e+07	3.35418e+07	3.15773e+07	3.65956e+07	3.10257e+07	2.78101e+07	1.30701e+07	2.05081e+07	1.70771e+07	2.58087e+07	1
High	Master Protein	A8DUV1	alpha-globin [OS=Mus musculus]	0	185.533	71	9	1079	2	142	15.1	8.22	11907	1742.94	8	7	Pf00042	110257		Hba-a2	2.83376e+09	1.7924e+09	1.27569e+09	1.15077e+09	1.09465e+09	1.17863e+09	2.48685e+09	1.73746e+09	5.45798e+08	7.03602e+08	5.9199e+08	8.31221e+08	1	Oxidation [P45]
High	Master Protein	A8Y5J3	Integrator complex subunit 11 [OS=Mus musculus]	0	37.472	11	5	54	5	578	65.4	8.27	644	55.32	5	5	Pf00753, Pf07521, Pf10996, Pf12706	71957	ENSMUSG00000029034.9	Cpsf3l; Ints11	2.69765e+06	2.42552e+06	3.17718e+06	3.92287e+06	3.53417e+06	3.05069e+06	2.3674e+06	2.35118e+06	1.35934e+06	2.39851e+06	1.9113e+06	2.15148e+06	1
High	Master Protein	B0LAC7	myosin light polypeptide 6 alkali smooth muscle and non-muscle protein [OS=Mus musculus]	0	15.934	74	2	7	1	27	3.1	4.32	67	7.68	1	2		667952		Gm8894	368217	495480	427431	583032	432811	746523	323140	480294	182874	356476	234066	526479	1	Acetyl [N-Term]
High	Master Protein	B0LAE4	ADP-ribosylation factor-like 6 interacting protein 1 [OS=Mus musculus]	0	14.952	7	1	36	1	137	15.9	8.29	155	40.61	1	1	Pf02453	54208		Arl6ip1	3.97468e+06	4.94793e+06	3.97828e+06	4.4615e+06	4.7529e+06	6.01103e+06	3.48809e+06	4796280	1.70209e+06	2.72784e+06	2.57039e+06	4239224	1
High	Master Protein	B1AQ75	Keratin, type I cuticular Ha6 [OS=Mus musculus]	0	11.143	7	4	55	3	473	52.8	5.05	383	53.85	4	4	Pf00038, Pf01576, Pf12128, Pf13514	16673	ENSMUSG00000020916.8	Krt36	248007	232562	229432	241678	216738	122398	217646	225434	98161.1	147767	117213	86320	1
High	Master Protein	B1AQF4	Dual-specificity protein phosphatase 3 [OS=Mus musculus]	0	51.164	20	3	52	3	210	23.2	7.31	1115	77.67	3	3	Pf00102, Pf00782	72349	ENSMUSG00000003518.13	Dusp3	2.00321e+06	2.89009e+06	1.79318e+06	2.19566e+06	2.92513e+06	3.01526e+06	1.75797e+06	2.80151e+06	767201	1.34246e+06	1.58192e+06	2.12648e+06	1
High	Master Protein	B1AR17	Chromodomain helicase DNA-binding protein 3 [OS=Mus musculus]	0	88.347	6	11	159	3	2055	232.6	6.27	1487	151.57	10	11	Pf00176, Pf00271, Pf00385, Pf00628, Pf06461, Pf06465, Pf08073, Pf08074	216848	ENSMUSG00000018474.17	Chd3	1.18219e+06	1.4532e+06	1.16352e+06	1.2101e+06	1.20891e+06	1.03598e+06	1.03746e+06	1.40866e+06	497805	739874	653784	730615	1
High	Master Protein	B1AR50	Gamma-aminobutyric acid receptor-associated protein [OS=Mus musculus]	0	10.006	10	1	10	1	106	12.2	9.8	20	13.55	1	1	Pf02991	56486	ENSMUSG00000018567.14	Gabarap	386513	518870	169110	432758	415533	848382	339196	502967	72352.9	264596	224722	598314	1
High	Master Protein	B1ARU1	Microtubule-actin cross-linking factor 1 [OS=Mus musculus]	0	288.96	6	31	364	1	5895	662.9	5.3	2631	337.66	31	30	Pf00036, Pf00435, Pf00681, Pf02187, Pf02463, Pf03938, Pf13499, Pf13514, Pf13833	11426	ENSMUSG00000028649.17	Macf1	519529	820504	1.14774e+06	1.22657e+06	701856	1.05432e+06	455928	795356	491053	749945	379567	743552	1
High	Master Protein	B1ARU4	Microtubule-actin cross-linking factor 1 [OS=Mus musculus]	0	451.899	8	48	543	18	7353	831.1	5.41	3982	518.65	48	47	Pf00036, Pf00307, Pf00435, Pf00681, Pf01576, Pf02187, Pf02463, Pf03938, Pf11971, Pf13499, Pf13514, Pf13833	11426	ENSMUSG00000028649.17	Macf1	2.35926e+07	2.92832e+07	2.75638e+07	2.87004e+07	2.70375e+07	2.35689e+07	2.07044e+07	2.83857e+07	1.1793e+07	1.75479e+07	1.4622e+07	1.66218e+07	1
High	Master Protein	B1ASW5	Trafficking protein particle complex 1, isoform CRA_a OS=Mus musculus GN=Trappc1 PE=1 SV=1	0	3.873	7	1	6	1	135	15.7	9.19	41		1		Pf04099	245828	ENSMUSG00000049299.14	Trappc1	179311	260570	189212	188939	328052	334814	157359	252583	80953.3	115520	177412	236125	1
High	Master Protein	B1ATP7	Zinc phosphodiesterase ELAC protein 2 [OS=Mus musculus]	0	36.537	9	5	19	5	823	91.9	7.52	88	18.53	4	5	Pf00753, Pf12706, Pf13691	68626	ENSMUSG00000020549.14	Elac2	1.70378e+06	1.84598e+06	1.6359e+06	1.6928e+06	1.50586e+06	1.8897e+06	1.4952e+06	1.7894e+06	699909	1.03501e+06	814374	1.33269e+06	1
High	Master Protein	B1ATR5	Glypican-3 [OS=Mus musculus]	0	21.098	6	2	24	2	430	48.9	7.08	223	44.67	2	2	Pf01153	14734	ENSMUSG00000055653.13	Gpc3	1.95599e+06	1.78609e+07	1.22296e+06	1.40375e+06	1.20092e+06	843615	1716537	1.73134e+07	523235	858279	649464	594952	1
High	Master Protein	B1ATV0	chloride channel protein [OS=Mus musculus]	0	9.377	4	4	43	4	816	90.6	6.54	161	8.55	3	4	Pf00571, Pf00654	12728	ENSMUSG00000004317.14	Clcn5	2.91327e+06	3.66283e+06	3.11479e+06	2.78229e+06	3.35981e+06	3.84564e+06	2.55662e+06	3.55057e+06	1.33265e+06	1.70114e+06	1.817e+06	2.7121e+06	1
High	Master Protein	B1AU25	Apoptosis-inducing factor 1, mitochondrial [OS=Mus musculus]	0	238.792	36	17	495	17	608	66.1	9.11	4610	740.35	16	17	Pf00070, Pf07992, Pf14721, Pf14962	26926	ENSMUSG00000036932.14	Aifm1	5.71847e+07	5.44518e+07	4.59365e+07	5.84037e+07	5.57857e+07	6.74095e+07	5.01841e+07	5.27829e+07	1.96536e+07	3.57091e+07	3.01692e+07	4.75399e+07	1	Oxidation [P164]
High	Master Protein	B1AUN2	eukaryotic translation initiation factor 2B, subunit 3 [OS=Mus musculus]	0	32.033	16	5	62	5	452	50.5	6.74	260	65.72	5	5	Pf00483, Pf02348, Pf12804	108067	ENSMUSG00000028683.14	Eif2b3	2.51742e+06	2.82048e+06	3.19264e+06	3.97403e+06	3.10214e+06	3.79833e+06	2.20923e+06	2.73403e+06	1.36595e+06	2.42979e+06	1.67765e+06	2.67874e+06	1
High	Master Protein	B1AVD2	Xaa-Pro aminopeptidase 2 [OS=Mus musculus]	0	42.562	8	6	36	6	741	83.7	6.67	291	35.67	6	6	Pf00557, Pf01321	170745	ENSMUSG00000037005.16	Xpnpep2	4.15017e+06	5.64893e+06	3.24938e+06	4.49529e+06	5.88068e+06	6.49895e+06	3.64211e+06	5475795	1.39023e+06	2.7485e+06	3.1803e+06	4.58333e+06	1
High	Master Protein	B1AWZ5	Protein NipSnap homolog 3B [OS=Mus musculus]	0	8.728	9	2	12	2	197	22.9	9.51	32	4.32	2	2	Pf07978	66536	ENSMUSG00000015247.10	Nipsnap3b	1.80531e+06	2.19942e+06	1.47322e+06	2.02038e+06	2.62275e+06	2.67205e+06	1.5843e+06	2.13201e+06	630310	1.2353e+06	1.4184e+06	1.88444e+06	1
Medium	Master Protein	B1AXP6-1	mitochondrial import receptor subunit TOM5 homolog [OS=Mus musculus]	0.015	1.76	14	1	4	1	51	6	9.6	24	0	1	1	Pf15178	68512	ENSMUSG00000078713.8	Tomm5	1.31753e+06	1.86352e+06	1.02104e+06	1.15703e+06	1.84739e+06	2.05752e+06	1.15623e+06	1806404	436847	707431	999076	1.45105e+06	1
High	Master Protein	B1AY86	Plexin domain-containing protein 2 [OS=Mus musculus]	0	7.18	3	1	8	1	479	53.7	6.65	136	2.14	1	1	Pf01437	67448	ENSMUSG00000026748.13	Plxdc2	287700	315998	187934	271907	207971	244819	252479	306312	80406.7	166249	112472	172657	1
High	Master Protein	B1AYU7	Pre-mRNA-splicing factor CWC22 homolog [OS=Mus musculus]	0	9.87	3	3	38	3	903	104.3	8.09	321	28.01	3	3	Pf02847, Pf02854	80744	ENSMUSG00000027014.14	Cwc22	1.9816e+06	2.48866e+06	2.15027e+06	2.20433e+06	2.37668e+06	2.05134e+06	1.73901e+06	2.41239e+06	919981	1.34777e+06	1.28532e+06	1.44669e+06	1
High	Master Protein	B1AZ26	Cordon-bleu protein-like 1 [OS=Mus musculus]	0	22.618	10	3	33	3	346	38	9.64	92	43.82	3	2	Pf09469		ENSMUSG00000034903.18		978344	1.28488e+06	1.31152e+06	1.45853e+06	1.45035e+06	1.55033e+06	858575	1.24549e+06	561128	891771	784357	1.09335e+06	1
High	Master Protein	B1AZ46	Brain-specific angiogenesis inhibitor 1-associated protein 2 [OS=Mus musculus]	0	10.228	4	2	10	2	521	57.6	8.79	60	3.8	2	2	Pf00018, Pf07653, Pf08397, Pf14604	108100	ENSMUSG00000025372.16	Baiap2	335714	404378	297544	632346	351944	453069	294616	391984	127302	386628	190333	319523	1
High	Master Protein	B1AZA7	Alpha-catulin [OS=Mus musculus]	0	8.478	5	1	4	1	219	23.6	8.66	51	5.36	1	1	Pf01044	54366	ENSMUSG00000038816.14	Ctnnal1	280376	381960	280432	328792	327234	321021	246052	370253	119981	201029	176969	226397	1
High	Master Protein	B1AZA8	Transmembrane protein 245 [OS=Mus musculus]	0	13.573	3	1	6	1	471	52.8	6.8	53	5.05	1	1	Pf01594	242474	ENSMUSG00000055296.14	Tmem245	137513	195954	182678	200631	206745	197323	120679	189948	78157.6	122669	111809	139160	1
High	Master Protein	B1AZI6	THO complex subunit 2 [OS=Mus musculus]	0	239.469	20	27	396	27	1594	182.7	8.44	3489	464.16	27	27	Pf11262, Pf11732	331401	ENSMUSG00000037475.15	Thoc2	4.19163e+07	3.73022e+07	4.88653e+07	4.97004e+07	4.58054e+07	4.02556e+07	3.67849e+07	3.61589e+07	2.09068e+07	3.03877e+07	2.47718e+07	2.83899e+07	1
High	Master Protein	B1B1D8	39S ribosomal protein L2, mitochondrial [OS=Mus musculus]	0	11.486	9	2	5	2	304	33.1	11.06	46	3.88	2	1	Pf00181, Pf03947	27398	ENSMUSG00000002767.13	Mrpl2	116333	130666	127016	85110.8	128252	157963	102091	126661	54342.8	52038.3	69359	111402	1
High	Master Protein	B2LVG5	cleavage and polyadenylation specific factor 4 isoform 1 [OS=Mus musculus]	0	6.465	12	2	7	2	243	27.4	8.22	26	6.24	2	2		54188	ENSMUSG00000029625.16	Cpsf4	474576		489597	436076	309238	405898	416478		209471	266625	167237	286256	1
High	Master Protein	B2M1R6	Heterogeneous nuclear ribonucleoprotein K [OS=Mus musculus]	0	597.592	67	29	2236	2	440	48.5	5.54	30332	3254.18	28	29	Pf00013, Pf08067, Pf13014, Pf13083	15387	ENSMUSG00000021546.17	Hnrnpk	7.54596e+08	6.70045e+08	8.19398e+08	8.66374e+08	7.61377e+08	7.88671e+08	6.62218e+08	6.49509e+08	3.50575e+08	5.29717e+08	4.11756e+08	5.56203e+08	1	Oxidation [P6; P23]; Acetyl [N-Term]
High	Master Protein	B2RPV4	C430048L16Rik protein [OS=Mus musculus]	0	11.874	4	3	10	3	834	96.4	7.85	22	3.71	3	3	Pf00076, Pf14259	77604		Rbm12b2	793984	900688	567546	1.07206e+06	496161	938472	696784	873082	242821	655476	268326	661849	1
High	Master Protein	B2RQ83	Gem (Nuclear organelle) associated protein 5 [OS=Mus musculus]	0	33.291	5	6	47	6	1502	166.4	6.71	642	39.81	6	6	Pf00400	216766		Gemin5	2.44749e+06	3.34015e+06	2.96026e+06	3.04168e+06	2.92957e+06	2.64993e+06	2.14787e+06	3.23778e+06	1.26653e+06	1.85974e+06	1.58433e+06	1.86884e+06	1
High	Master Protein	B2RQS1	Striatin-3 [OS=Mus musculus]	0	42.573	10	4	34	3	712	77.7	5.22	219	42.97	4	4	Pf00400, Pf08232	94186	ENSMUSG00000020954.16	Strn3	785405	1.14992e+06	650707	1.11354e+06	858959	1.28099e+06	689256	1.11468e+06	278401	680839	464529	903408	1
High	Master Protein	B2RRI2	protein strawberry notch homolog 1 [OS=Mus musculus]	0	11.288	1	1	2	1	1391	153.8	8.07	63	2.43	1	1	Pf13871, Pf13872	243272	ENSMUSG00000038095.15	Sbno1	241965		384570	231798		239398	212343		164536	141726		168833	1
High	Master Protein	B2RRN5	RAB4a, member RAS oncogene family [OS=Mus musculus]	0	36.816	25	4	24	3	213	23.9	6.07	147	46.05	3	4	Pf00009, Pf00025, Pf00071, Pf08477	19341		Rab4a	1.19525e+06	1.89733e+06	1.50488e+06	1.39999e+06	1.88941e+06	2.37709e+06	1.04893e+06	1.83918e+06	643853	855979	1.0218e+06	1.67642e+06	1
High	Master Protein	B2RSH2	Guanine nucleotide-binding protein G(i) subunit alpha-1 [OS=Mus musculus]	0	93.271	19	6	279	1	354	40.3	5.97	2722	377.9	5	6	Pf00025, Pf00503	14677	ENSMUSG00000057614.6	Gnai1	1.13282e+06	1.52399e+06	1.19802e+06	1.59446e+06	1.88569e+06	1.96923e+06	994137	1.47728e+06	512566	974884	1.01979e+06	1388782	1
High	Master Protein	B2RTG1	thrombospondin, type I, domain containing 4 [OS=Mus musculus]	0	12.33	3	2	6	2	658	73.9	6.05	22	3.52	2	2	Pf00090, Pf05986, Pf08686	207596		Thsd4	319357	573433	525818	595450	403299	706524	280261	555858	224968	364069	218106	498270	1
High	Master Protein	B2RUA5	SAPS domain family, member 1 [OS=Mus musculus]	0	13.408	5	2	13	2	856	94.5	4.64	23	2.94	2	2	Pf04499	243819		Ppp6r1	305231	633299	448422	517301	485741	575935	267864	613889	191855	316287	262691	406173	1
High	Master Protein	B2RUD1	Transmembrane protein 165 [OS=Mus musculus]	0	23.286	17	3	21	1	323	34.8	7.46	203	29.69	3	2	Pf01169	21982		Tmem165	1.6618e+06	2.45765e+06	2.04166e+06	2.30259e+06	2.49374e+06	1.96203e+06	1.45836e+06	2.38232e+06	873512	1.40784e+06	1.34863e+06	1.38371e+06	1
High	Master Protein	B2RUD2	Ubp1 protein [OS=Mus musculus]	0	7.398	4	2	15	2	504	56.2	6.19	0	1.62	2	2	Pf04516	22221		Ubp1	559865	713900	606458	550606	515743	542808	491326	692020	259470	336650	278916	382811	1
High	Master Protein	B2RUG7	zinc finger RNA binding protein [OS=Mus musculus]	0	202.49	24	18	230	18	1052	114.4	9.07	3580	303.66	18	18	Pf07528, Pf12171, Pf12874	22763		Zfr	1.48567e+07	1.42803e+07	1.71174e+07	1.79909e+07	1.43604e+07	1.50633e+07	1.30379e+07	1.38426e+07	7.32356e+06	1.1e+07	7.76619e+06	1.06232e+07	1
High	Master Protein	B2RUJ2	ERBB2IP protein [OS=Mus musculus]	0	11.254	3	3	26	3	1294	145	5.41	208	18.9	2	3	Pf00595, Pf12799, Pf13855	59079	ENSMUSG00000021709.14	Erbb2ip; Erbin	1.04277e+06	1.01492e+06	1.1015e+06	937711	848343	1.03763e+06	915114	983814	471269	573334	458788	731778	1
High	Master Protein	B2RWW1	Microtubule-associated protein 1S [OS=Mus musculus]	0	29.46	5	5	69	5	973	103	7.02	308	53.17	5	5		270058		Map1s; Mtap1s	3.74715e+06	3.77871e+06	3.92391e+06	4.20476e+06	3.89276e+06	4.21077e+06	3.28842e+06	3.6629e+06	1.67882e+06	2.57087e+06	2.10522e+06	2.96961e+06	1
High	Master Protein	B2RWW2	Golgb1 protein [OS=Mus musculus]	0	32.675	2	5	53	5	3238	369.9	5.05	566	38.35	5	5	Pf04111, Pf05622, Pf07888, Pf09726, Pf12128, Pf13166	224139		Golgb1	837537	1.53905e+06	1.19637e+06	1.48179e+06	1.81823e+06	1.87832e+06	735005	1.49188e+06	511861	905994	983309	1.32467e+06	1
Medium	Master Protein	B2RWY4	Whirlin [OS=Mus musculus]	0.011	1.936	3	1	13	1	907	96.5	8.41	0		1		Pf00595, Pf11874, Pf13180	73750		Whrn	3.80714e+06	5.66033e+06	4.36971e+06	5.66976e+06	5.59075e+06	5.92968e+06	3341071	5486845	1.86956e+06	3.46659e+06	3.0235e+06	4181853	1	Oxidation [P578; K581; P582; P583; P584; P585; P586]
High	Master Protein	B2RX14	Terminal uridylyltransferase 4 [OS=Mus musculus]	0	4.058	1	2	17	2	1644	184.5	8.19	22	2.35	2	2	Pf00098, Pf01909, Pf03828, Pf05539	230594	ENSMUSG00000034610.14	Zcchc11	211269	230883	184808	175559	166617	222097	185405	223807	79069.2	107340	90107	156632	1
High	Master Protein	B2RXC1	trafficking protein particle complex subunit 11 [OS=Mus musculus]	0	3.964	1	1	11	1	1133	128.3	7.58	15	11.28	1	1	Pf07919, Pf11817, Pf12742	320714	ENSMUSG00000038102.15	Trappc11	419036	564651	453669	596641	477741	512592	367737	547344	194099	364797	258365	361501	1
High	Master Protein	B2RXL7	Kidins220 protein [OS=Mus musculus]	0	16.281	3	4	9	4	1672	185.4	6.65	0	0	4	4	Pf00023, Pf07693, Pf12796, Pf13606, Pf13637, Pf13857	77480		Kidins220	884200	805250	828418	861249	728713	957448	775956	780569	354434	526583	394091	675232	1
High	Master Protein	B2RXP1	Leucine-rich repeat and calponin homology domain-containing protein 3 [OS=Mus musculus]	0	7.613	3	2	14	2	742	82.2	6.77	29	5.3	2	2	Pf00307, Pf12799, Pf13855	70144	ENSMUSG00000022801.13	Lrch3	193435	301746	198082	282640	189268	337109	169754	292498	84748.3	172811	102357	237743	1
High	Master Protein	B2RXQ2	Ppfia1 protein [OS=Mus musculus]	0	24.351	4	4	22	4	1266	142.6	6.25	77	5.75	4	4	Pf00536, Pf01576, Pf02463, Pf04012, Pf04111, Pf04156, Pf05622, Pf06637, Pf07647, Pf09726, Pf09731, Pf12128, Pf13514, Pf13851, Pf14915, Pf15619	233977	ENSMUSG00000037519.17	Ppfia1	641593	714360	757266	683233	731358	693671	563049	692465	323992	417741	395521	489205	1
High	Master Protein	B2RXS4	Plexin-B2 [OS=Mus musculus]	0	166.36	11	16	192	14	1842	206.1	5.87	1118	164.81	16	16	Pf01403, Pf01437, Pf01833, Pf08337	140570	ENSMUSG00000036606.16	Plxnb2	1.056e+07	1.1628e+07	1.17462e+07	1.21023e+07	1.17283e+07	1.0525e+07	9.26727e+06	1.12716e+07	5.02556e+06	7.39958e+06	6.34274e+06	7.42268e+06	1
High	Master Protein	B2RXT3	Ogdhl protein [OS=Mus musculus]	0	81.955	11	11	270	5	1010	114.5	6.84	2318	272.13	11	11	Pf00676, Pf02779	239017		Ogdhl	2.2375e+06	2.52585e+06	2.47805e+06	2.37296e+06	2.58897e+06	1.80949e+06	1.96358e+06	2.44843e+06	1.06022e+06	1.45087e+06	1.40013e+06	1.27613e+06	1
High	Master Protein	B2RXT5	glucose-6-phosphate isomerase [OS=Mus musculus]	0	194.587	43	15	566	1	344	38.3	8.48	7515	815.52	15	15	Pf00342	14751		Gpi1	1.18514e+07	1.16683e+07	9.7679e+06	8.19775e+06	1.17656e+07	7.58103e+06	10400515	11310671	4179141	5.01225e+06	6.36288e+06	5346452	1
High	Master Protein	B2RXU2	ESF1, nucleolar pre-rRNA processing protein, homolog (S. cerevisiae) [OS=Mus musculus]	0	15.734	3	2	7	2	845	98	5.05	87	4.68	2	2	Pf08159	66580		Esf1	804187	146187	675009	733819	552735	637833	705738	141706	288799	448670	298922	449826	1
High	Master Protein	B2RXX8	Cdc42bpa protein [OS=Mus musculus]	0	9.805	2	2	15	1	1732	196.8	6.62	15	2.32	2	2	Pf00069, Pf00130, Pf00169, Pf00433, Pf00769, Pf00780, Pf01442, Pf01576, Pf02463, Pf02841, Pf03999, Pf04012, Pf04111, Pf04156, Pf05483, Pf05557, Pf05622, Pf05667, Pf05701, Pf05911, Pf06008, Pf06160, Pf06785, Pf06810, Pf07111, Pf07714, Pf07888, Pf07926, Pf08317, Pf08826, Pf09726, Pf09755, Pf10174, Pf12128, Pf12718, Pf12795, Pf13166, Pf13514, Pf13851, Pf13868, Pf13870, Pf14362, Pf14531, Pf14992, Pf1…	226751		Cdc42bpa	169398	180311	190606	159624	235970	247652	148660	174785	81549.9	97596.8	127614	174655	1
High	Master Protein	B2RY08	DOCK9 protein [OS=Mus musculus]	0	7.323	1	2	22	1	2042	233.6	7.42	79	8.74	2	2	Pf00169, Pf06920, Pf11878, Pf14429	105445		Dock9	982309	1.24696e+06	980523	1.14123e+06	1.19259e+06	1.28705e+06	862054	1.20874e+06	419511	697771	644960	907678	1
High	Master Protein	B2RY19	Cgnl1 protein [OS=Mus musculus]	0.003	2.915	1	1	6	1	1298	148.1	5.77	33	3.56	1	1	Pf00038, Pf00769, Pf01496, Pf01576, Pf02463, Pf03961, Pf03962, Pf04094, Pf04111, Pf04156, Pf05262, Pf05483, Pf05557, Pf05622, Pf05667, Pf05701, Pf05911, Pf06008, Pf06160, Pf06548, Pf06785, Pf07111, Pf07888, Pf07946, Pf09726, Pf09730, Pf10174, Pf12128, Pf13166, Pf13514, Pf13851, Pf13863, Pf13868, Pf13870, Pf14932, Pf14992, Pf15070, Pf15450	68178		Cgnl1	207941	262951	145646	195737	310745	438925	182484	254892	62313.8	119677	168053	309548	1
High	Master Protein	B2RY27	mCG125789, isoform CRA_a [OS=Mus musculus]	0	9.715	2	2	6	2	898	105.3	7.36	33	1.77	2	2	Pf00069, Pf07714, Pf09731, Pf14531	330177		Taok3	531527	704464	701611	702384	694260	718357	466457	682873	300180	429450	375459	506615	1
High	Master Protein	B2RY48	Whsc1 protein [OS=Mus musculus]	0	3.874	2	1	4	1	630	69.4	8.98	0	0	1	1	Pf00505, Pf00855	107823		Whsc1; Nsd2	192981	151881	264560	257035	180715	217207	169356	147226	113190	157156	97731.6	153183	1
High	Master Protein	B2RY56	RNA-binding protein 25 [OS=Mus musculus]	0	153.044	19	13	299	13	838	99.5	6.32	1688	305.61	13	13	Pf00076, Pf01480, Pf14259	67039	ENSMUSG00000010608.15	Rbm25	2.47454e+07	2.50579e+07	2.47216e+07	2.79216e+07	2.27111e+07	2.29148e+07	2.1716e+07	2.42899e+07	1.0577e+07	1.70717e+07	1.22823e+07	1.61605e+07	1
High	Master Protein	B3V097	BetaCstF-64 variant 3 [OS=Mus musculus]	0	13.643	5	3	22	3	630	66.4	7.08	167	15.3	3	3	Pf00076, Pf13893, Pf14259, Pf14304, Pf14327	108062		Cstf2	1.31928e+06	901116	1.31053e+06	1.33556e+06	1.17213e+06	925828	1.15777e+06	873497	560705	816584	633894	652932	1
High	Master Protein	B7ZC46	Septin-8 [OS=Mus musculus]	0	47.251	16	6	175	2	440	50.9	6.09	2151	173.11	6	6	Pf00735	20362	ENSMUSG00000018398.18	Sept8	2.38583e+06	3.49576e+06	3.20072e+06	2.91314e+06	2.57605e+06	2.6868e+06	2.09375e+06	3.38862e+06	1.36941e+06	1.78114e+06	1.39314e+06	1.89484e+06	1
High	Master Protein	B7ZCF4	Lysosomal acid phosphatase [OS=Mus musculus]	0.001	3.569	4	1	6	1	166	19.2	8.92	33	1.69	1	1	Pf00328	11432	ENSMUSG00000002103.15	Acp2	425169	546568	422889	400856	452974	431467	373119	529816	180930	245091	244971	304288	1
High	Master Protein	B7ZMW5	cDNA sequence X99384 [OS=Mus musculus]	0	26.248	6	5	55	5	859	96.7	6.57	87	32.34	5	5	Pf14566	27355		Pald1	2.4441e+06	2.68967e+06	2.57534e+06	2.35514e+06	2.3031e+06	2.31336e+06	2.14489e+06	2.60723e+06	1.10185e+06	1.43997e+06	1.24553e+06	1.63148e+06	1
High	Master Protein	B7ZN33	Nisch protein [OS=Mus musculus]	0	12.19	1	2	4	2	1424	155.8	5.08	28	4.35	2	2	Pf12799, Pf13855	64652		Nisch	825848	893263	889915	819783	890972	1.0092e+06	724747	865885	380745	501230	481841	711733	1
Medium	Master Protein	B7ZNG8	IQ domain-containing protein H [OS=Mus musculus]	0.039	1.024	1	1	1	1	1030	117.8	9.09	0		1			78250	ENSMUSG00000037801.13	Iqch	598985	676280	630453	785581	718063	781214	525657	655552	269736	480318	388332	550944	1
High	Master Protein	B7ZP20	ankyrin repeat and FYVE domain containing 1 [OS=Mus musculus]	0	124.02	17	12	108	12	1169	128.6	5.91	977	97.44	12	12	Pf00023, Pf00651, Pf01363, Pf07707, Pf12796, Pf13606, Pf13637, Pf13857	11736		Ankfy1	5.55863e+06	7.23097e+06	6.08459e+06	6.72135e+06	6.98167e+06	6.81253e+06	4.87814e+06	7.00934e+06	2.60326e+06	4.10955e+06	3.77572e+06	4.80448e+06	1
High	Master Protein	B7ZP42	Cask protein [OS=Mus musculus]	0	25.936	8	6	20	6	920	104.4	6.43	143	12.3	6	5	Pf00018, Pf00069, Pf00595, Pf00625, Pf02828, Pf07653, Pf07714, Pf13180, Pf14604	12361		Cask	1.85652e+07	2.1446e+07	1.82047e+07	1.78203e+07	1.80885e+07	2.14382e+07	1.62924e+07	2.07887e+07	7.78879e+06	1.08957e+07	9.78234e+06	1.51191e+07	1
Medium	Master Protein	B7ZWE9	Fam92b protein [OS=Mus musculus]	0.028	1.331	3	1	2	1	232	26.3	6.96	0	1.65	1	1	Pf06730	436062		Fam92b	2.53226e+06	1.05104e+06	1.1415e+06	1.10386e+06	1.22143e+06	823030	2222263	1.01883e+06	488384	674921	660554	580434	1
Medium	Master Protein	B7ZWN9	SUMO/sentrin specific peptidase 6, isoform CRA_a [OS=Mus musculus]	0.012	1.852	1	1	4	1	1139	127.8	6.7	0	0	1	1	Pf02902	215351		Senp6	219154	258246	290785	313262	270609	270038	192325	250331	124411	191534	146347	190442	1
High	Master Protein	B8JJN0	predicted gene 20547 [OS=Mus musculus]	0	54.864	5	7	69	6	1276	142.2	7.36	331	51.24	7	5	Pf00084, Pf00089, Pf00092, Pf13519	14962	ENSMUSG00000092511.7	Cfb	4.40507e+06	4.73996e+06	4.71731e+06	3.54086e+06	4.20258e+06	3.28704e+06	3.86579e+06	4.59469e+06	2.01827e+06	2.16495e+06	2.27278e+06	2.31816e+06	1
High	Master Protein	B8X349	JNK-interacting leucine zipper protein long form [OS=Mus musculus]	0	15.978	2	3	38	3	1320	146	5.2	209	1.68	3	3	Pf09744	70834		Spag9	877168	1.09014e+06	872049	990244	1.35058e+06	1.02589e+06	769784	1.05673e+06	373101	605453	730401	723500	1
High	Master Protein	B9EHJ3	Tight junction protein ZO-1 [OS=Mus musculus]	0	473.385	33	41	813	41	1685	188.7	6.67	10212	1046.89	41	41	Pf00018, Pf00595, Pf00625, Pf00791, Pf07653, Pf13180	21872	ENSMUSG00000030516.14	Tjp1	5.17066e+07	4.67524e+07	6.2432e+07	6.80076e+07	5.27456e+07	5.85818e+07	4.53766e+07	4.53195e+07	2.67112e+07	4.15811e+07	2.8525e+07	4.13143e+07	1	Oxidation [K348]
High	Master Protein	B9EIU1	glutamyl-prolyl-tRNA synthetase [OS=Mus musculus]	0	647.952	38	44	999	44	1512	169.9	7.59	12796	1505.85	44	44	Pf00458, Pf00587, Pf00749, Pf01406, Pf03129, Pf03950, Pf09180, Pf14497	107508		Eprs	1.58476e+08	1.69446e+08	1.77476e+08	1.66841e+08	1.72354e+08	1.58201e+08	1.39076e+08	1.64253e+08	7.59322e+07	1.0201e+08	9.32098e+07	1.1157e+08	1	Oxidation [K300; K528; P1115; K1132; P1472]
High	Master Protein	B9EJ37	SH3 and PX domains 2B [OS=Mus musculus]	0	18.476	7	4	32	4	908	101.4	8.66	48	1.63	4	4	Pf00018, Pf00787, Pf06347, Pf07653, Pf08239, Pf14604	268396		Sh3pxd2b	1.63062e+06	1.87028e+06	1.78769e+06	1.98127e+06	1.29504e+06	1.51158e+06	1.431e+06	1.81296e+06	764853	1.21139e+06	700366	1.06603e+06	1
High	Master Protein	B9EJ54	mCG21756, isoform CRA_b [OS=Mus musculus]	0	322.442	19	33	609	33	2008	227.3	6.34	6560	694.45	33	33	Pf11894	70699	ENSMUSG00000038759.15	Nup205	4.33327e+07	5.23319e+07	5.33435e+07	5.8466e+07	5.61628e+07	4.44895e+07	3.80279e+07	5.0728e+07	2.28227e+07	3.57471e+07	3.03731e+07	3.13759e+07	1	Oxidation [P1148]
High	Master Protein	B9EJ77	Tanc1 protein [OS=Mus musculus]	0	5.947	1	2	8	2	1849	200	8.32	0	2.14	2	2	Pf00023, Pf12796, Pf13414, Pf13424, Pf13432, Pf13606, Pf13637, Pf13857	66860		Tanc1	670657	746800	579374	692014	597889	649092	588555	723911	247882	423110	323341	457766	1
High	Master Protein	B9EJ86	Oxysterol-binding protein-related protein 8 [OS=Mus musculus]	0	65.518	13	9	72	8	889	101.2	6.96	312	44.78	9	8	Pf00169, Pf01237	237542	ENSMUSG00000020189.14	Osbpl8	8.37591e+06	1.06138e+07	9.34907e+06	1.2257e+07	9.8613e+06	1.1613e+07	7.35053e+06	1.02885e+07	3.99994e+06	7.49414e+06	5.33304e+06	8.18997e+06	1
High	Master Protein	B9EK92	Ras interacting protein 1 [OS=Mus musculus]	0	20.31	7	5	34	5	961	103.5	7.83	143	27.22	5	5	Pf00788, Pf01843	69903		Rasip1	1.77926e+06	2.41357e+06	1.68125e+06	1.65834e+06	1.67501e+06	2.19252e+06	1.56145e+06	2.33959e+06	719314	1.01394e+06	905854	1.54625e+06	1
High	Master Protein	B9EK95	MYOF protein [OS=Mus musculus]	0	57.539	4	6	59	5	2061	234.4	6.14	305	50.48	6	6	Pf00168, Pf08150, Pf08151, Pf08165	226101		Myof	1.43991e+06	1.70794e+06	1.56139e+06	1.39092e+06	1.41471e+06	1.31126e+06	1.26363e+06	1.65559e+06	668033	850432	765080	924756	1
High	Master Protein	B9EKB0	laminin B1 subunit 1 [OS=Mus musculus]	0	404.853	20	33	959	32	1834	202.3	5.01	10142	1169.49	33	32	Pf00038, Pf00053, Pf00055, Pf01442, Pf01576, Pf05557, Pf05698, Pf06008, Pf07111, Pf08317, Pf08647, Pf09731, Pf13476, Pf13868, Pf15346	16777		Lamb1	9.8768e+07	9.20183e+07	9.66168e+07	9.85582e+07	9.12088e+07	9.91126e+07	8.66767e+07	8.9198e+07	4.13369e+07	6.02602e+07	4.93261e+07	6.98983e+07	1	Oxidation [K231]
High	Master Protein	B9EKB8	insulin-like growth factor 2 receptor [OS=Mus musculus]	0	506.596	24	42	683	30	2483	273.6	5.68	8835	908.83	42	42	Pf00040, Pf00878, Pf02157, Pf09451	16004		Igf2r	6.01451e+07	6.23553e+07	7.35331e+07	7.17992e+07	5.78209e+07	5.13468e+07	5.27821e+07	6.04441e+07	3.14607e+07	4.38993e+07	3.12698e+07	3.62119e+07	1
High	Master Protein	B9EKC3	Rho GTPase activating protein 5 [OS=Mus musculus]	0	13.274	1	2	4	2	1503	172.3	6.55	48	4.11	2	2	Pf00071, Pf00620, Pf01846	11855		Arhgap5	362582	385384	473379	408143	438093	389382	318194	373572	202532	249546	236923	274608	1
High	Master Protein	B9EKE9	Ddx3x protein [OS=Mus musculus]	0	620.888	59	40	1587	6	661	73	7.18	20220	2142.3	40	40	Pf00270, Pf00271, Pf04851	13205		Ddx3x	3.31002e+08	2.86852e+08	3.60161e+08	3.70799e+08	2.99916e+08	2.86608e+08	2.9048e+08	2.7806e+08	1.54093e+08	2.26713e+08	1.62196e+08	2.02128e+08	1	Oxidation [K342; P359; P568]
High	Master Protein	B9EKK3	IQ motif containing GTPase activating protein 2 [OS=Mus musculus]	0	93.8	10	14	148	1	1575	180.4	5.59	933	118.39	13	13	Pf00307, Pf00616, Pf03836	544963		Iqgap2	2.47783e+06	3.37122e+06	2.27022e+06	2.56685e+06	3.14422e+06	8.80531e+07	2.17449e+06	3.26789e+06	971301	1.56942e+06	1.70041e+06	6.20987e+07	1
High	Master Protein	B9EKP5	Filamin, alpha [OS=Mus musculus]	0	2077.62	60	122	4933	111	2639	280.3	6.01	75339	8060.93	121	122	Pf00307, Pf00630	192176		Flna	8.89009e+08	9.06494e+08	8.41911e+08	8.44073e+08	8.84702e+08	7.56786e+08	7.80176e+08	8.78711e+08	3.60207e+08	5.16081e+08	4.78451e+08	5.33717e+08	1	Oxidation [P448; P1460; P2196]
High	Master Protein	B9EKT8	Uncharacterized protein [OS=Mus musculus]	0.002	3.069	1	1	14	1	1403	160.8	5.53	0	13.19	1	1	Pf03962, Pf04111, Pf13514	382090		4922501C03Rik; Cep162	2.6536e+06	2.94162e+06	2.75841e+06	2.68849e+06	3.40727e+06	3.92612e+06	2.32875e+06	2.85146e+06	1.18017e+06	1.64379e+06	1.84266e+06	2.76886e+06	1
High	Master Protein	B9EKU4	URB2 ribosome biogenesis 2 homolog (S. cerevisiae) [OS=Mus musculus]	0	7.291	1	2	28	2	1524	171.6	7.34	118	18.02	2	2	Pf10441	382038		Urb2	551557	686994	780357	738261	638812	681094	484035	665938	333871	451386	345473	480336	1
High	Master Protein	B9V1K9	NADH-ubiquinone oxidoreductase chain 5 [OS=Mus musculus domesticus]	0	42.952	6	3	116	3	607	68.4	9.03	1461	135.42	3	3	Pf00361, Pf00662, Pf06455				7.08282e+06	8.61046e+06	7.87127e+06	7.3938e+06	8.42833e+06	8.40139e+06	6.21573e+06	8.34655e+06	3.36768e+06	4.52071e+06	4558079	5.925e+06	1
High	Master Protein	C0HK79	Adipocyte-related X-chromosome expressed sequence 1 [OS=Mus musculus]	0	22.257	12	2	60	2	180	20.1	9.6	1066	86.76	2	2	Pf04573	76219; 76976	ENSMUSG00000048040.8; ENSMUSG00000048355.2	Arxes1; Arxes2	2.2242e+06	2.35641e+06	2.18105e+06	2.89914e+06	3.35864e+06	3.54547e+06	1.95191e+06	2.28418e+06	933152	1.77259e+06	1.81637e+06	2.50041e+06	1
High	Master Protein	C0HKD8	microfibrillar-associated protein 1A [OS=Mus musculus]	0	77.288	17	5	105	5	439	51.9	4.98	784	86.16	5	5	Pf06991	67532; 100034361	ENSMUSG00000048222.3; ENSMUSG00000068479.5	Mfap1a; Mfap1b	3.6467e+06	2.11492e+06	3.24075e+06	3.72338e+06	3.08024e+06	3.86507e+06	3.20027e+06	2.0501e+06	1.38653e+06	2.27654e+06	1.66581e+06	2.72581e+06	1
High	Master Protein	C0LL95	nephrosis 2-like protein [OS=Mus musculus]	0	36.157	13	3	34	3	395	43.4	9.2	582	52.14	3	3	Pf01145	170484		Nphs2	875648	980973	581420	965919	582146	1.28869e+06	768451	950907	248757	590580	314827	908839	1
High	Master Protein	C5H0E8	Rap1A-retro1 [OS=Mus musculus]	0	132.316	49	8	213	2	184	21	6.67	2626	314.85	7	8	Pf00009, Pf00071, Pf08477	668838		Gm9392	3.31477e+07	3.95966e+07	4.37885e+07	3.95499e+07	4.42344e+07	5.08822e+07	2.90897e+07	3.8383e+07	1.87347e+07	2.41815e+07	2.39222e+07	3.58842e+07	1	Oxidation [P110]
Medium	Master Protein	C6EQH2	ASL1/Herc2 fusion protein [OS=Mus musculus]	0.019	1.605	0	1	2	1	4746	517	6.34	0	0	1	1	Pf00173, Pf00415, Pf00569, Pf00632, Pf03256, Pf06701, Pf11515, Pf13540				922836	596824	810809	735619	560597	417832	809861	578532	346900	449770	303173	294672	1
High	Master Protein	C7ECU2	Angiotensin-converting enzyme [OS=Mus musculus]	0	7.29	2	2	6	2	787	90.3	5.9	30	4.24	2	2	Pf01401	70008		Ace2	634962	444411	501338	548199	765156	513877	557230	430790	214495	335178	413800	362407	1
Medium	Master Protein	D2EAC2-1	zinc finger BED domain-containing protein 6 [OS=Mus musculus]	0.011	1.94	1	1	6	1	980	109.1	6.73	0	0	1	1	Pf02892, Pf05699	667118	ENSMUSG00000102049.1; ENSMUSG00000094410.7	Zbed6	155432	214712	226747	215989	178400	186867	136404	208132	97012.5	132060	96479.6	131786	1
High	Master Protein	D3YTN4	GTPase IMAP family member 4 [OS=Mus musculus]	0	117.804	29	8	198	8	328	38	6.23	2154	246.89	8	8	Pf01926, Pf04548	107526	ENSMUSG00000054435.16	Gimap4	1.77735e+07	2.09035e+07	1.91976e+07	2.03277e+07	2.1168e+07	2.44421e+07	1.55976e+07	2.02628e+07	8.21357e+06	1.24287e+07	1.14478e+07	1.72376e+07	1
High	Master Protein	D3YTQ5	acyl-CoA dehydrogenase family member 11 [OS=Mus musculus]	0	19.354	4	2	34	2	661	74	8.1	662	42.64	2	2	Pf00441, Pf01636, Pf02770, Pf02771, Pf08028		ENSMUSG00000090150.10		906284	1.32792e+06	757649	1.18594e+06	1.57854e+06	1.33148e+06	795336	1.28722e+06	324156	725108	853680	939015	1
High	Master Protein	D3YTR5	methyl-CpG-binding domain protein 3 [OS=Mus musculus]	0	13.105	10	2	8	2	261	29.1	5.63	58	5.35	2	2	Pf01429, Pf14048		ENSMUSG00000035478.14		341127	318443	365894	495012	587648	482734	299366	308683	156545	302659	317803	340444	1
High	Master Protein	D3YTR6	Protein spinster homolog 1 [OS=Mus musculus]	0	7.786	5	2	5	2	476	51.4	7.44	13	3.82	2	2	Pf00083, Pf07690		ENSMUSG00000030741.15		402362	707834	305727	453123	511302	588129	353105	686139	130803	277048	276514	414773	1
High	Master Protein	D3YTT4	Isobutyryl-CoA dehydrogenase, mitochondrial [OS=Mus musculus]	0	54.919	21	6	78	6	413	45	8.02	572	100.89	6	6	Pf00441, Pf02770, Pf02771, Pf08028		ENSMUSG00000031969.16		4.07464e+06	5.54197e+06	3.95486e+06	4.78814e+06	5.47518e+06	5.55754e+06	3.57582e+06	5.37212e+06	1.69206e+06	2.92756e+06	2.961e+06	3.91941e+06	1
High	Master Protein	D3YTU3	ribosomal oxygenase 2 [OS=Mus musculus]	0	23.916	8	2	14	2	373	42.7	6.8	45	14.38	2	2	Pf08007, Pf13621		ENSMUSG00000022724.15		355283	701464	246567	228103	465064	704053	311789	679965	105492	139467	251509	496527	1
High	Master Protein	D3YU12	NmrA-like family domain-containing protein 1 [OS=Mus musculus]	0	79.32	32	7	145	7	299	33.1	6.8	1062	164.34	7	7	Pf00106, Pf02254, Pf03807, Pf05368, Pf08659, Pf13460	67824	ENSMUSG00000063445.14	Nmral1	7.67069e+06	8.87597e+06	9.61034e+06	8.46259e+06	8.75354e+06	8.11532e+06	6.73164e+06	8.60393e+06	4.11173e+06	5.17418e+06	4.73396e+06	5.72326e+06	1
High	Master Protein	D3YU39	Cholinephosphotransferase 1 [OS=Mus musculus]	0	9.123	3	1	4	1	406	45.4	7.08	49	4.36	1	1	Pf01066	212862	ENSMUSG00000060002.14	Chpt1	421194	614386	423846	520305	757536	763828	369631	595556	181340	318124	409679	538683	1
High	Master Protein	D3YU58	Anaphase-promoting complex subunit 7 [OS=Mus musculus]	0	11.865	8	3	8	3	503	56.1	8.51	50	2.34	3	3	Pf00515, Pf07719, Pf09674, Pf13414		ENSMUSG00000029466.11		676677	738941	793645	854104	754285	650068	593838	716293	339557	522215	407921	458454	1
High	Master Protein	D3YUM1	NADH dehydrogenase [ubiquinone] flavoprotein 1, mitochondrial [OS=Mus musculus]	0	182.801	45	15	410	15	455	49.9	8.07	5993	567.12	15	15	Pf01512, Pf10531, Pf10589		ENSMUSG00000037916.13		4.56969e+07	6.36271e+07	4.93031e+07	5.87998e+07	6.33585e+07	6.04506e+07	4.01027e+07	6.1677e+07	2.1094e+07	3.59513e+07	3.42646e+07	4.26323e+07	1
Medium	Master Protein	D3YUP0	Vacuolar protein sorting-associated protein 8 homolog [OS=Mus musculus]	0.021	1.538	0	1	3	1	1429	161.2	5.6	0	0	1	1	Pf12816, Pf13639	209018	ENSMUSG00000033653.17	Vps8	254267	346549	250462	244060	236262	274497	223140	335927	107158	149223	127771	193587	1
High	Master Protein	D3YUV1	Nuclear receptor-binding protein [OS=Mus musculus]	0	24.045	5	2	27	2	543	60.8	5.16	177	36.1	2	2	Pf00069, Pf07714	192292	ENSMUSG00000029148.15	Nrbp1	1.62406e+06	1.56067e+06	1.78034e+06	1.65739e+06	1.43102e+06	1.49545e+06	1.42524e+06	1.51284e+06	761707	1.01336e+06	773900	1.05465e+06	1
High	Master Protein	D3YV40	Protein kinase c-binding protein nell1 [OS=Mus musculus]	0.007	2.195	4	1	6	1	379	42.3	8.65	0		1		Pf02210		ENSMUSG00000055409.14		1.64775e+07	1.65817e+07	2.02681e+07	2.12927e+07	2.11836e+07	2.75819e+07	1.44603e+07	1.60735e+07	8.67159e+06	1.30187e+07	1.14562e+07	1.94519e+07	1	Oxidation [P135]
High	Master Protein	D3YVU0	Ubiquitin carboxyl-terminal hydrolase 46 [OS=Mus musculus]	0	17	11	3	27	3	339	39.5	7.36	336	13.58	3	3	Pf00443, Pf13423		ENSMUSG00000054814.14		848026	1.23207e+06	1.14187e+06	862545	918050	1.02599e+06	744210	1.1943e+06	488544	527375	496486	723570	1
High	Master Protein	D3YVW2	Golgi integral membrane protein 4 [OS=Mus musculus]	0	60.355	9	5	74	5	683	79.9	4.86	839	95.76	5	5		73124	ENSMUSG00000034109.15	Golim4	3.09054e+06	2.77609e+06	3.16302e+06	3.19357e+06	3.01665e+06	2.01393e+06	2.71219e+06	2.69101e+06	1.35328e+06	1.95261e+06	1.63142e+06	1.42031e+06	1
High	Master Protein	D3YVX4	Stromal membrane-associated protein 1 [OS=Mus musculus]	0	29.469	7	2	36	2	355	37.8	8.13	345	47.65	2	2		98366	ENSMUSG00000026155.13	Smap1	714233	1.06884e+06	924806	947199	1.08871e+06	1.26466e+06	626796	1.03608e+06	395673	579134	588778	891889	1
High	Master Protein	D3YWF6	Ubiquitin thioesterase otub1 [OS=Mus musculus]	0	136.933	53	10	342	10	241	28	5.29	4286	428.26	10	10	Pf02338, Pf10275		ENSMUSG00000024767.11		2.6961e+07	3.3758e+07	2.38206e+07	2.66582e+07	2.73337e+07	2.97768e+07	2.36604e+07	3.27234e+07	1.01915e+07	1.62993e+07	1.47822e+07	2.09998e+07	1
High	Master Protein	D3YWK1	WD repeat domain phosphoinositide-interacting protein 2 [OS=Mus musculus]	0	6.316	6	2	5	2	425	46.4	5.85	23	0	2	2			ENSMUSG00000029578.15		1.06626e+06	1.26618e+06	1.00856e+06	1.08744e+06	1.12049e+06	1.19123e+06	935730	1.22737e+06	431508	664883	605969	840102	1
High	Master Protein	D3YWT0	Signal peptidase complex catalytic subunit SEC11 [OS=Mus musculus]	0	42.935	21	4	128	4	170	19.6	9.48	1793	161.82	4	4	Pf00717		ENSMUSG00000025724.12		1.36031e+07	1.71327e+07	1.65251e+07	1.61988e+07	1.91653e+07	2.13947e+07	1.19378e+07	1.66076e+07	7.07016e+06	9.90426e+06	1.03647e+07	1.50884e+07	1
High	Master Protein	D3YWX2	YLP motif-containing protein 1 [OS=Mus musculus]	0	61.669	6	8	49	8	2139	240.9	6.68	177	37.5	8	6	Pf13207, Pf13671	56531	ENSMUSG00000021244.15	Ylpm1	1.81281e+06	1.0644e+06	1.63637e+06	1.76534e+06	1.33172e+06	1.39076e+06	1.59088e+06	1.03178e+06	700113	1.07936e+06	720199	980820	1	Oxidation [K2049]
High	Master Protein	D3YXD1	Ubiquitin-conjugating enzyme E2 E2 [OS=Mus musculus]	0	19.646	20	3	44	3	181	19.8	8.31	370	42.26	3	3	Pf00179		ENSMUSG00000058317.11		2.46462e+06	3.12837e+06	2.62587e+06	2.89957e+06	3.408e+06	3.52236e+06	2162898	3.03249e+06	1.12346e+06	1.77285e+06	1.84306e+06	2.48411e+06	1
Medium	Master Protein	D3YXG0	Hemicentin-1 [OS=Mus musculus]	0.028	1.322	0	1	4	1	5634	611.2	6.64	0	0	1	1	Pf00008, Pf00047, Pf00090, Pf00092, Pf06247, Pf07474, Pf07645, Pf07654, Pf07679, Pf07686, Pf08205, Pf12662, Pf12947, Pf13519, Pf13895, Pf13927, Pf14670	545370	ENSMUSG00000066842.18	Hmcn1	148738	221065	226508	178278	259487	150168	130530	214290	96910	109002	140332	105905	1
High	Master Protein	D3YXK2	Scaffold attachment factor B1 [OS=Mus musculus]	0	134.087	22	16	246	9	937	105	5.35	2676	310.74	16	16	Pf00076, Pf02037, Pf13893, Pf14259	224903	ENSMUSG00000071054.12	Safb	1.29786e+07	1.20636e+07	1.48532e+07	1.60258e+07	1.47798e+07	1.4112e+07	1.13898e+07	1.16939e+07	6.35486e+06	9.79844e+06	7.99298e+06	9.95235e+06	1
High	Master Protein	D3YXZ0	CCR4-NOT transcription complex subunit 6-like [OS=Mus musculus]	0	6.22	14	2	14	2	130	14.8	8.46	30	1.63	2	2	Pf12799, Pf13855		ENSMUSG00000034724.17		415343	489766	398117	414548	418964	464065	364496	474755	170332	253462	226578	327278	1
High	Master Protein	D3YXZ3	Kinesin light chain 2 [OS=Mus musculus]	0	27.236	7	3	14	1	617	68.1	7.06	80	15.11	3	3	Pf09311, Pf11068, Pf12895, Pf13374, Pf13414, Pf13424, Pf13432		ENSMUSG00000024862.16		309332	279375	286708	271813	275595	293554	271463	270812	122666	166191	149043	207026	1
Medium	Master Protein	D3YY07	Palmitoyltransferase [OS=Mus musculus]	0.012	1.882	3	1	6	1	442	50.7	8.44	0	0	1	1	Pf00023, Pf01529, Pf12796, Pf13606, Pf13637, Pf13857		ENSMUSG00000030471.17		316100	459517	464130	525454	507904	567334	277403	445433	198575	321272	274677	400107	1
High	Master Protein	D3YY75	Vang-like protein [OS=Mus musculus]	0	7.556	2	1	14	1	561	63.9	9.28	37	2.17	1	1	Pf06638	93840	ENSMUSG00000026556.15	Vangl2	145938	199003	102851	173404	148530	187786	128072	192903	44004	106022	80325.6	132434	1
High	Master Protein	D3YYC2	Dr1-associated corepressor [OS=Mus musculus]	0	10.954	7	1	14	1	162	17.6	5.44	272	21.41	1	1	Pf00125, Pf00808		ENSMUSG00000024914.16		855934	1.04924e+06	902647	1.15631e+06	1.09239e+06	1.3441e+06	751150	1017084	386192	706987	590770	947917	1
High	Master Protein	D3YYC3	Histone-lysine N-methyltransferase [OS=Mus musculus]	0	6.571	1	1	8	1	1308	144.5	5.99	31	2.24	1	1	Pf00856, Pf01429, Pf05033	84505	ENSMUSG00000015697.14	Setdb1	243456	261925	326586	362484	329456	396691	213652	253897	139728	221629	178171	279763	1
High	Master Protein	D3YYN3	Exosome complex component RRP43 [OS=Mus musculus]	0	23.963	23	2	30	2	130	14	5.07	378	34.97	2	2	Pf01138		ENSMUSG00000027752.15		1.45617e+06	1.42198e+06	1.7226e+06	1.86409e+06	1.49723e+06	1.66812e+06	1.2779e+06	1.3784e+06	737003	1.13974e+06	809711	1.17643e+06	1
High	Master Protein	D3YYS6	monoglyceride lipase [OS=Mus musculus]	0.004	2.519	3	1	2	1	331	36.6	7.21	0	0	1	1	Pf00561, Pf00756, Pf00975, Pf01764, Pf12146, Pf12695, Pf12697		ENSMUSG00000033174.17		128630	133279		154737	221424	216890	112883	129194		94608.9	119747	152960	1
High	Master Protein	D3YYT1	Putative oxidoreductase GLYR1 [OS=Mus musculus]	0	220.515	32	14	255	14	552	60.4	9.13	3042	326.23	14	14	Pf00855, Pf02737, Pf03446, Pf03807, Pf14833	74022	ENSMUSG00000022536.13	Glyr1	1.27453e+07	1.5074e+07	1.27395e+07	1.60051e+07	1.73719e+07	1.82355e+07	1.1185e+07	1.46119e+07	5.45051e+06	9.78583e+06	9.39478e+06	1.28604e+07	1	Oxidation [P521]
High	Master Protein	D3YYU8	Obscurin-like protein 1 [OS=Mus musculus]	0	71.316	8	11	99	11	1804	197.8	5.41	860	65.98	11	11	Pf00041, Pf00047, Pf01108, Pf07679, Pf07686, Pf13895, Pf13927	98733	ENSMUSG00000026211.17	Obsl1	3.80487e+06	3.82537e+06	4.85747e+06	4.39984e+06	4.67152e+06	4.00942e+06	3.33908e+06	3.70813e+06	2.07824e+06	2.69014e+06	2.52638e+06	2.82761e+06	1
High	Master Protein	D3YZ08	Telomeric repeat-binding factor 2 [OS=Mus musculus]	0	35.542	8	4	24	4	540	60.1	9.5	287	21.66	4	4	Pf00249, Pf08558, Pf13873, Pf13921	21750	ENSMUSG00000031921.17	Terf2	424869	489298	1.10297e+06	1.49296e+06	1.5744e+06	2.03558e+06	372857	474301	471898	912823	851444	1.43558e+06	1
High	Master Protein	D3YZ09	H/ACA ribonucleoprotein complex subunit [OS=Mus musculus]	0	48.049	39	7	141	7	198	20.4	10.14	700	117.17	7	7	Pf04410		ENSMUSG00000028010.16		9.93501e+06	1.01607e+07	1.24709e+07	1.35997e+07	1.13553e+07	1.41091e+07	8.71876e+06	9.84931e+06	5.33562e+06	8.31509e+06	6.14102e+06	9.9503e+06	1	Oxidation [P90]
High	Master Protein	D3YZJ1	sequestosome-1 [OS=Mus musculus]	0	4.719	7	1	10	1	382	41.7	7.72	0	2.46	1	1	Pf00564, Pf00569		ENSMUSG00000015837.15		230385	228166	241280	246597	289578	321810	202181	221173	103230	150774	156605	226954	1
High	Master Protein	D3YZW1	SLIT-ROBO Rho GTPase-activating protein 1 [OS=Mus musculus]	0	14.114	2	2	25	1	1085	124	6.87	201	18.39	2	2	Pf00018, Pf00611, Pf00620, Pf07653, Pf14604	117600	ENSMUSG00000020121.15	Srgap1	1.25269e+06	1.1361e+06	632651	1.38026e+06	1.22511e+06	1.90456e+06	1.09933e+06	1.10128e+06	270676	843916	662547	1.34317e+06	1
High	Master Protein	D3Z030	F-actin-uncapping protein LRRC16A [OS=Mus musculus]	0	34.283	5	4	44	4	1332	147.1	7.87	120	33.04	4	4		68732	ENSMUSG00000021338.17	Lrrc16a; Carmil1	1.19033e+06	1.99471e+06		1.52938e+06	1.39623e+06	1.55806e+06	1.04461e+06	1.93357e+06		935090	755090	1.09881e+06	1
High	Master Protein	D3Z041	Long-chain-fatty-acid--CoA ligase 1 [OS=Mus musculus]	0	88.711	19	10	104	10	699	78	7.47	917	102.76	9	10	Pf00501		ENSMUSG00000018796.13		7.72179e+06	1.0808e+07	7.60219e+06	8.60911e+06	1.02029e+07	1.02477e+07	6.77648e+06	1.04767e+07	3.25255e+06	5.26376e+06	5.51776e+06	7.22713e+06	1	Acetyl [N-Term]
High	Master Protein	D3Z065	Beta-1,4-galactosyltransferase 7 [OS=Mus musculus]	0	3.631	4	1	22	1	220	25.8	7.75	220	21.38	1	1	Pf02709, Pf13733		ENSMUSG00000021504.14		130524	164419	171469	245401	182440	164695	114545	159380	73362	150043	98664.1	116150	1
High	Master Protein	D3Z0I8	Transmembrane protein 109 [OS=Mus musculus]	0	12.856	6	1	26	1	213	22.7	9.31	610	42.43	1	1	Pf14965		ENSMUSG00000034659.14		2.82905e+06	3.65458e+06	3.28482e+06	3.36618e+06	3.52144e+06	3.89774e+06	2.48272e+06	3.54257e+06	1405393	2.05814e+06	1.90441e+06	2.74885e+06	1
High	Master Protein	D3Z0M9	DEAD (Asp-Glu-Ala-Asp) box polypeptide 23 [OS=Mus musculus]	0	198.204	35	25	437	25	819	95.4	9.58	3019	492.99	25	25	Pf00270, Pf00271, Pf04851	74351	ENSMUSG00000003360.14	Ddx23	4.47687e+07	4.03648e+07	4.71702e+07	5.12652e+07	4.12556e+07	3.56111e+07	3.92881e+07	3.91276e+07	2.01815e+07	3.13445e+07	2.23112e+07	2.51144e+07	1	Oxidation [P570]
High	Master Protein	D3Z131	THO complex subunit 6 homolog [OS=Mus musculus]	0	53.032	24	5	81	5	296	32.7	7.11	1114	92.9	5	5	Pf00400		ENSMUSG00000041319.13		7.45744e+06	7.10455e+06	7.90932e+06	9.65449e+06	8.40241e+06	7.83925e+06	6.5445e+06	6.8868e+06	3.38395e+06	5.90293e+06	4.54406e+06	5.52856e+06	1
High	Master Protein	D3Z158	glutamine--tRNA ligase [OS=Mus musculus]	0	258.66	33	21	494	21	751	85	7.3	4602	658.23	21	21	Pf00749, Pf03950, Pf04557, Pf04558		ENSMUSG00000032604.16		4.19928e+07	4.99156e+07	5.12037e+07	4.75206e+07	4.77732e+07	4.6146e+07	3.6852e+07	4.83857e+07	2.19072e+07	2.9055e+07	2.58359e+07	3.25441e+07	1
High	Master Protein	D3Z191	Transmembrane protein 106B [OS=Mus musculus]	0	6.133	6	1	14	1	185	20.7	8.56	172	12.9	1	1	Pf07092		ENSMUSG00000029571.14		401443	411042		517218	662368	669217	352298	398444		316237	358212	471960	1
High	Master Protein	D3Z1H8	glycolipid transfer protein [OS=Mus musculus]	0	8.594	7	1	6	1	179	20.3	6.2	71	3.71	1	1	Pf08718		ENSMUSG00000011884.13		234633	318086	203964	253665	350928	333504	205909	308337	87264.7	155095	189783	235201	1
High	Master Protein	D3Z1Y1	E3 ubiquitin-protein ligase synoviolin [OS=Mus musculus]	0	13.448	5	3	16	3	608	66.9	7.08	59	2.01	3	3	Pf00097, Pf12678, Pf12861, Pf12906, Pf13445, Pf13639, Pf13920, Pf13923, Pf14634		ENSMUSG00000024807.17		1.32069e+06	763560	639432	669895	607454	609168	1.15901e+06	740157	273577	409586	328514	429611	1
High	Master Protein	D3Z282	RISC-loading complex subunit TARBP2 [OS=Mus musculus]	0	8.825	5	1	2	1	225	24.2	6.8		0		1	Pf00035, Pf14709		ENSMUSG00000023051.10		156136	218621	252067	237469	194019	260533	137021	211921	107845	145193	104926	183738	1
High	Master Protein	D3Z2E9	RIKEN cDNA 2010107G23 gene [OS=Mus musculus]	0	5.807	11	1	20	1	122	13.3	11.3	101	15.86	1	1	Pf15378		ENSMUSG00000020083.13		143976	217256	124513	202938	185457	223117	126351	210598	53272.3	124080	100296	157351	1
High	Master Protein	D3Z342	Paraplegin [OS=Mus musculus]	0.006	2.227	5	1	3	1	230	26.2	8.69	0	1.84	1	1			ENSMUSG00000000738.18		248414	481649	321944	383137	353066	361349	218003	466887	137742	234257	190940	254838	1
High	Master Protein	D3Z383	mesoderm specific transcript, isoform CRA_a [OS=Mus musculus]	0	75.498	22	6	158	6	342	39.5	9.5	1741	253.34	6	6	Pf00561, Pf06342, Pf12695, Pf12697	17294	ENSMUSG00000051855.15	Mest	3.2497e+07	3.323e+07	4.16271e+07	4.25897e+07	3.31436e+07	3.65427e+07	2.85187e+07	3.22116e+07	1.78099e+07	2.60401e+07	1.79242e+07	2.57714e+07	1
High	Master Protein	D3Z3N4	Heterogeneous nuclear ribonucleoprotein H3 [OS=Mus musculus]	0	110.582	37	9	301	8	346	36.8	6.87	4333	391.32	9	9	Pf00076, Pf14259	432467	ENSMUSG00000020069.16	Hnrnph3	3.26384e+07	2.4559e+07	3.32017e+07	3.46763e+07	3.00712e+07	3.2942e+07	2.86428e+07	23806310	1.42052e+07	2.12017e+07	1.62626e+07	2.32321e+07	1
High	Master Protein	D3Z4C9	Ubiquinol-cytochrome-c reductase complex assembly factor 2 [OS=Mus musculus]	0	5.954	16	2	4	2	127	15.4	9.7	23	0	1	2			ENSMUSG00000024208.15		339033	411858	217852	275689	429348	614691	297529	399235	93206.8	168561	232193	433505	1
High	Master Protein	D3Z4D3	Nephronectin [OS=Mus musculus]	0	41.082	12	5	46	5	532	58.1	8.59	293	42.58	4	5	Pf00629, Pf07645, Pf12662, Pf12947		ENSMUSG00000040998.18		740026	882285	766129	821235	1.23918e+06	1.27284e+06	649431	855244	327784	502118	670153	897657	1
High	Master Protein	D3Z4J5	Golgi to ER traffic protein 4 homolog [OS=Mus musculus]	0.003	2.974	5	1	10	1	246	27.6	6.95	28	5.35	1	1	Pf04190		ENSMUSG00000025858.12		390060	508033	623877	572020	531996	611659	342309	492462	266922	349743	287706	431367	1
High	Master Protein	D3Z4J9	Echinoderm microtubule-associated protein-like 1 [OS=Mus musculus]	0	16.884	7	4	39	3	800	88.3	7.94	63	7.55	4	4	Pf00400, Pf03451	68519	ENSMUSG00000058070.14	Eml1	374304	374467	412591	394894	462973	443186	328482	362990	176525	241445	250378	312553	1
High	Master Protein	D3Z4V3	epsin-1 [OS=Mus musculus]	0	15.2	13	1	20	1	90	10.4	8.47	210	28.22	1	1	Pf01417		ENSMUSG00000035203.16		461200	468617	248608	596602	726200	871430	404740	454254	106365	364773	392732	614569	1
High	Master Protein	D3Z589	LIM and calponin homology domains-containing protein 1 [OS=Mus musculus]	0.003	2.877	2	1	4	1	898	100.7	5.44	31	1.67	1	1	Pf00412	77569	ENSMUSG00000037736.18	Limch1	111165	95811.5	112077	202822	163859	150207	97555.8	92875	47951.5	124009	88615.6	105932	1
High	Master Protein	D3Z5B1	Zinc finger, BED type-containing 5 [OS=Mus musculus]	0	23.551	19	2	68	2	183	19.2	8.28	802	115.6	2	2	Pf06747		ENSMUSG00000034173.13		1.31479e+06	1.04932e+06	1.37461e+06	1.77967e+06	1.63675e+06	1.81109e+06	1.15384e+06	1.01716e+06	588118	1.08812e+06	885162	1.27726e+06	1
High	Master Protein	D3Z5G8	Disco-interacting protein 2 homolog B [OS=Mus musculus]	0	14.012	4	4	12	4	1341	146.7	8.03	48	2.09	4	4	Pf00501		ENSMUSG00000023026.15		1.16782e+06	1.34403e+06	1.38447e+06	1.19083e+06	1.32852e+06	1.17368e+06	1.02486e+06	1.30283e+06	592339	728092	718469	827726	1
High	Master Protein	D3Z5N6	Zinc finger protein ubi-d4 [OS=Mus musculus]	0	62.877	18	5	44	5	405	45.8	7.14	753	54.93	5	5	Pf00628, Pf14051	19708	ENSMUSG00000024826.14	Dpf2	3.19016e+06	3.3857e+06	3.95866e+06	3.52437e+06	2.86648e+06	4.82662e+06	2.79962e+06	3.28193e+06	1.69369e+06	2.15486e+06	1.5502e+06	3.40393e+06	1
High	Master Protein	D3Z5T2	Armadillo repeat-containing protein 10 [OS=Mus musculus]	0	55.501	23	4	92	4	238	25.8	8.85	1002	120.02	4	4	Pf04826		ENSMUSG00000038525.16		7.3409e+06	5.73126e+06	8.33697e+06	8.8429e+06	8.74088e+06	9.31858e+06	6.44222e+06	5.5556e+06	3.56692e+06	5.4067e+06	4.72711e+06	6571846	1
High	Master Protein	D3Z615	Transmembrane emp24 domain-containing protein 5 [OS=Mus musculus]	0.005	2.512	7	1	6	1	96	10.6	5.08	20	1.84	1	1	Pf01105		ENSMUSG00000063406.11		552263	816284	606865	710211	730309	692939	484654	791266	259644	434236	394954	488689	1
High	Master Protein	D3Z6I4	Crystallin, zeta (Quinone reductase)-like 1, isoform CRA_h [OS=Mus musculus]	0	21.29	10	2	32	2	333	37	6.09	214	74.65	2	2	Pf00107	66609	ENSMUSG00000058240.13	Cryzl1	1.10923e+06	1.34168e+06	1.56579e+06	1.29977e+06	1.24354e+06	2.7208e+06	973434	1.30056e+06	669914	794704	672510	1.91882e+06	1
High	Master Protein	D3Z783	RAC-alpha serine/threonine-protein kinase [OS=Mus musculus]	0	49.25	19	6	59	6	437	50.9	6.13	447	53.32	6	6	Pf00069, Pf00169, Pf00433, Pf07714, Pf15413		ENSMUSG00000001729.14		2.77529e+06	3.79282e+06	2.55571e+06	3.05226e+06	3.00555e+06	3.17366e+06	2.43554e+06	3.67658e+06	1.09345e+06	1.86621e+06	1.62542e+06	2.23819e+06	1
High	Master Protein	D3Z7B5	RIKEN cDNA C330027C09 gene [OS=Mus musculus]	0.01	2.013	1	1	6	1	907	102.1	6.39	0	1.68	1	1	Pf00521, Pf01147, Pf01576, Pf02463, Pf04111, Pf05010, Pf05103, Pf05557, Pf11902, Pf13166, Pf15070		ENSMUSG00000033031.13		225415	213208	182221	179873	186649	148856	197819	206674	77962.2	109978	100941	104979	1
High	Master Protein	D3Z7C6	Prostaglandin E synthase 3 [OS=Mus musculus]	0	98.963	38	6	190	6	130	15	4.79	2457	226.6	6	6	Pf04969		ENSMUSG00000071072.12		3.27288e+07	2.8553e+07	3.04843e+07	3.26243e+07	3.36334e+07	3.75059e+07	2.87222e+07	2.76778e+07	1.30425e+07	1.99471e+07	1.81891e+07	2.64507e+07	1
High	Master Protein	D3Z7F1	Cytochrome P450 2S1 [OS=Mus musculus]	0	13.373	7	3	14	3	448	49.8	9.19	152	13.26	3	3	Pf00067		ENSMUSG00000040703.11		1.08112e+06	1.36938e+06	1.06126e+06	1.09941e+06	1.25868e+06	1.29532e+06	948766	1.32741e+06	454054	672198	680701	913516	1
High	Master Protein	D3Z7I9	Oxysterol-binding protein [OS=Mus musculus]	0.001	3.255	5	1	4	1	184	20.6	6.87	27	2.08	1	1	Pf01237		ENSMUSG00000044252.17		330135	511658	416856	293596	519616	347704	289720	495976	178349	179510	281010	245215	1
High	Master Protein	D3Z7J3	Phospholipid scramblase [OS=Mus musculus]	0.001	3.331	7	1	2	1	172	19.3	4.88	0	0	1	1	Pf03803		ENSMUSG00000032372.14		308639	326517	288916	288140	281789	387790	270855	316509	123611	176174	152393	273486	1
High	Master Protein	D3Z7L3	Testis-expressed protein 30 [OS=Mus musculus]	0.003	2.731	13	1	2	1	69	7.5	10.21	24	2.48	1	1	Pf12695		ENSMUSG00000026049.11			513860	468642	616091	570112	516785		498111	200506	376689	308319	364458	1
High	Master Protein	D3Z7P0	BRISC and BRCA1-A complex member 2 [OS=Mus musculus]	0	17.982	6	2	46	2	385	43.7	6.19	452	36.59	2	2	Pf06113		ENSMUSG00000052139.18		1.29588e+06	1.49985e+06	1.45031e+06	1.44432e+06	1.44308e+06	1.60207e+06	1.13724e+06	1.45388e+06	620507	883086	780426	1.12984e+06	1
High	Master Protein	D3Z7P3-1	Glutaminase kidney isoform, mitochondrial [OS=Mus musculus]	0	88.185	21	9	143	2	674	73.9	7.99	1740	164.5	9	8	Pf04960, Pf12796	14660	ENSMUSG00000026103.14	Gls	6.26035e+06	7.14955e+06	6.08724e+06	7.03565e+06	7.34385e+06	7.39702e+06	5.49396e+06	6.93042e+06	2.60439e+06	4.30172e+06	3.97159e+06	5.21668e+06	1	Oxidation [P114; K126]
High	Master Protein	D3Z7P3-2	Isoform 2 of Glutaminase kidney isoform, mitochondrial [OS=Mus musculus]	0	98.247	18	8	79	1	603	66	8.12		179.66		8	Pf04960	14660	ENSMUSG00000026103.14	Gls	306173	449645	398048	459966	463136	427834	268691	435864	170303	281232	250466	301726	1	Oxidation [P114; K126]
High	Master Protein	D3Z7S8	transcription initiation factor IIA subunit 2 [OS=Mus musculus]	0.003	2.994	10	1	6	1	87	10.2	5.31	23	1.69	1	1	Pf02268, Pf02751		ENSMUSG00000033543.17		7.42166e+06	2.75593e+06	3.56351e+06	3.68468e+06	3.25053e+06	3.15157e+06	6513098	2.67146e+06	1.52463e+06	2.25288e+06	1.7579e+06	2.22262e+06	1
High	Master Protein	D6Q0F6	Cytoplasmic dynein intermediate chain 2 isoform 2.2 [OS=Mus musculus]	0	131.556	29	10	180	10	650	72.8	5.15	2006	283.46	10	10	Pf00400, Pf11540	13427		Dync1i2	1.15873e+07	1.15154e+07	1.12374e+07	9.63351e+06	9.09081e+06	8.65968e+06	1.01687e+07	1.11624e+07	4.80784e+06	5.8901e+06	4.91635e+06	6.10716e+06	1
High	Master Protein	D6RCW9	thymidylate synthase [OS=Mus musculus]	0	14.262	15	2	16	2	140	16.3	9.01	108	19.58	2	2	Pf00303		ENSMUSG00000025747.12		2.81104e+06	3.16928e+06	3.10291e+06	3.07693e+06	3.30594e+06	919685	2.46691e+06	3.07214e+06	1.32756e+06	1.88129e+06	1.78787e+06	648600	1
High	Master Protein	D6RCX5	Mitochondrial fission regulator 1-like [OS=Mus musculus]	0	11.598	6	1	21	1	202	22.4	10.51	115	15.33	1	1	Pf05308		ENSMUSG00000046671.18		4.37494e+06	4.99279e+06	3.93857e+06	4.50717e+06	5.78598e+06	5.8491e+06	3.83935e+06	4839762	1.68509e+06	2755767	3.12909e+06	4.12502e+06	1
High	Master Protein	D6RDS0	cDNA sequence BC017158 [OS=Mus musculus]	0	11.169	4	1	6	1	347	36.8	7.75	98	4.64	1	1	Pf04884		ENSMUSG00000030780.15		260866	344841	347736	321509	329963	423296	228931	334272	148777	196576	178446	298526	1
High	Master Protein	D6RE34	ceroid-lipofuscinosis, neuronal 6 [OS=Mus musculus]	0	10.685	43	1	4	1	40	4.3	9.98	60	4.41	1	1			ENSMUSG00000032245.12		138812	164210	232283	211645	182235	194347	121818	159177	99381.1	129403	98553.3	137061	1
High	Master Protein	D6RFQ2	predicted gene 42957 [OS=Mus musculus]	0	5.366	4	1	2	1	366	39.8	9.22	0	0	1	1	Pf05648		ENSMUSG00000106447.1		235698	271627	148774	148621	211785	301142	206843	263301	63652.2	90869.4	114534	212378	1
Medium	Master Protein	D6RGM2	O-phosphoseryl-tRNA(Sec) selenium transferase [OS=Mus musculus]	0.017	1.666	8	1	4	1	91	10.2	4.84	0	1.69	1	1			ENSMUSG00000029173.12		2.22985e+06	1.542e+06	1.29088e+06	1.39148e+06	1.23738e+06	1.0249e+06	1.95687e+06	1.49474e+06	552294	850779	669178	722802	1
High	Master Protein	D6RGM8	Transmembrane 9 superfamily member [OS=Mus musculus]	0.003	2.985	2	1	14	1	417	47.3	6.74	83	0	1	1	Pf02990		ENSMUSG00000002320.15		355041	513927		282023	242063	374773	311576	498175		172434	130909	264305	1
High	Master Protein	D6RI20	haloacid dehalogenase-like hydrolase domain-containing protein 2 [OS=Mus musculus]	0	15.2	13	1	2	1	152	16.2	8.75	55	4.32	1	1	Pf08571		ENSMUSG00000025421.14		1.04679e+06	967004	1.40273e+06	1.45666e+06	1.36675e+06	2.23428e+06	918638	937366	600151	890631	739143	1.57571e+06	1
Medium	Master Protein	D6RJL6	Protein lin-54 homolog [OS=Mus musculus]	0.02	1.589	12	1	9	1	98	10.1	10.52	0	0	1	1			ENSMUSG00000035310.15		4.54855e+06	2.65655e+06	3.29628e+06	2.95271e+06	2.41029e+06	2.53795e+06	3.99171e+06	2.57513e+06	1.41029e+06	1.80534e+06	1.3035e+06	1.78987e+06	1	Oxidation [P57; P60; K62]
High	Master Protein	E0CX20	Protein BUD31 homolog [OS=Mus musculus]	0	42.654	28	5	67	5	144	17	8.82	655	84.54	5	5	Pf01125	231889	ENSMUSG00000038722.17	Bud31	4.48402e+06	4.77003e+06	5.22682e+06	6.48061e+06	5.75889e+06	7.99384e+06	3.93508e+06	4.62384e+06	2.23627e+06	3.96236e+06	3.11444e+06	5.63758e+06	1
High	Master Protein	E0CXN5	Glycerol-3-phosphate dehydrogenase [NAD(+)] [OS=Mus musculus]	0	202.505	60	19	380	18	326	35.2	7.59	4188	485.15	19	19	Pf01210, Pf07479		ENSMUSG00000023019.12		5.31887e+07	6.96606e+07	4.45418e+07	5.06041e+07	6.61577e+07	7.17897e+07	4.66773e+07	6.75255e+07	1.90569e+07	3.09403e+07	3.57784e+07	5.06291e+07	1	Oxidation [K266]
High	Master Protein	E0CXR8	Partitioning defective 3 homolog [OS=Mus musculus]	0.001	3.366	1	1	4	1	990	108.8	6.51	0	0	1	1	Pf00595, Pf12053, Pf13180		ENSMUSG00000025812.17			270511	262414		273987	198115		262220	112272		148173	139719	1
High	Master Protein	E0CXU3	MKI67 FHA domain-interacting nucleolar phosphoprotein [OS=Mus musculus]	0	9.906	14	1	5	1	101	11.8	9.85	0	6.48	1	1	Pf00076, Pf13893, Pf14259		ENSMUSG00000026377.12		173660	260898	421760	326405	304679	282963	152400	252901	180447	199570	164772	199557	1
High	Master Protein	E0CYE2	inosine-5'-monophosphate dehydrogenase [OS=Mus musculus]	0	11.408	5	3	54	1	489	52.4	6.55	274	49.11	3	3	Pf00478, Pf00571, Pf00977, Pf01070, Pf03060, Pf05690		ENSMUSG00000003500.13		283854	378251	264043	276464	310827	402606	249104	366658	112969	169035	168097	283935	1
High	Master Protein	E0CYE6	Type 1 phosphatidylinositol 4,5-bisphosphate 4-phosphatase [OS=Mus musculus]	0	8.485	8	1	2	1	283	30.2	8.38	0	2.19	1	1	Pf09788		ENSMUSG00000035953.13		140449	200766	122580	202522	186585	197694	123255	194613	52445.2	123826	100906	139422	1
High	Master Protein	E0CYH0	mCG16685, isoform CRA_d [OS=Mus musculus]	0	18.071	12	3	17	3	396	44.2	5.25	74	11.78	3	3		60532	ENSMUSG00000060475.12	Wtap	674136	450268	698143	836550	383699	258920	591608	436468	298696	511482	207506	182601	1
High	Master Protein	E0CYH4	WD repeat-containing protein 26 [OS=Mus musculus]	0	14.523	6	3	21	3	625	68.8	6.15	30	6.5	3	3	Pf00400, Pf08662	226757	ENSMUSG00000038733.13	Wdr26	793728	968970	673465	739572	628113	751848	696559	939271	288138	452188	339686	530234	1
High	Master Protein	E0CYH9	Carboxyl-terminal PDZ ligand of neuronal nitric oxide synthase protein [OS=Mus musculus]	0	13.886	5	1	5	1	228	25.4	9.16	21	1.63	1	1	Pf00640		ENSMUSG00000038473.14		929976	1.08191e+06	874253	677739	652463	422926	816128	1.04875e+06	374044	414382	352855	298265	1
High	Master Protein	E0CYQ2	NudC domain-containing protein 2 [OS=Mus musculus]	0	13.745	16	2	18	2	132	14.7	4.68	136	15.33	2	2	Pf04969	52653	ENSMUSG00000020328.10	Nudcd2	1.11326e+06	1.28473e+06	1.43315e+06	1.18243e+06	1.28612e+06	1.17309e+06	976975	1.24536e+06	613166	722959	695540	827315	1
High	Master Protein	E0CYW1	ubiquitin-like protein 5 [OS=Mus musculus]	0	14.769	38	2	48	2	56	6.5	9.66	227	31.95	2	2			ENSMUSG00000084786.9		578514	974875	399196	553447	1.36577e+06	955218	507692	944996	170794	338387	738616	673659	1
High	Master Protein	E0CYX9	Coiled-coil domain-containing protein 127 [OS=Mus musculus]	0	9.952	5	1	4	1	238	27.7	8.76	82	4.78	1	1			ENSMUSG00000021578.16		180927	317516	255732	363757	310981	305083	158778	307785	109414	222408	168180	215157	1
High	Master Protein	E0CZD9	Zinc finger protein-like 1 [OS=Mus musculus]	0	5.419	4	1	7	1	242	26.8	7.11	27	0	1	1			ENSMUSG00000024792.8		323362	383717	237296	349609	393529	344470	283775	371957	101526	213757	212822	242934	1
High	Master Protein	E0CZE8	Bax inhibitor 1 [OS=Mus musculus]	0	9.456	28	1	18	1	32	3.8	9.83	99	19.42	1	1			ENSMUSG00000023010.14		1.79301e+06	3.37036e+06	898487	2.18943e+06	1.69566e+06	3.43955e+06	1.57351e+06	3.26706e+06	384412	1.33866e+06	917018	2.42571e+06	1
High	Master Protein	E3SRG8	Mothers against decapentaplegic homolog [OS=Mus musculus]	0	6.659	4	2	15	2	455	49.9	6.79	30	2.15	2	2	Pf03165, Pf03166	17128		Smad4	1.19813e+06	1.3424e+06	1.308e+06	893179	778426	984727	1.05145e+06	1.30126e+06	559622	546105	420976	694470	1
High	Master Protein	E3VWA1	Anion exchange protein [OS=Mus musculus]	0	48.813	8	7	126	7	1026	115.1	6.87	658	79.76	7	7	Pf00359, Pf00955, Pf07565	54403		Slc4a4	3.41422e+06	6.13547e+06	2.85564e+06	3.78867e+06	4.87587e+06	6.45393e+06	2.99625e+06	5947419	1.22177e+06	2.31646e+06	2.63689e+06	4.55158e+06	1
High	Master Protein	E5Q371	Integrin-associated protein [OS=Mus musculus]	0	11.133	4	1	6	1	303	33.1	8.63	22	5.62	1	1	Pf04549, Pf08204	16423		Cd47	728166	711119	653313		789244		639024	689323	279516		426827		1
High	Master Protein	E5RKB6	FELE-1 [OS=Mus musculus]	0	5.988	1	2	28	2	2571	276.3	6.64	160	18.19	2	2	Pf00193, Pf02469, Pf12947	192187		Stab1	763919	1.08688e+06	866907	1.16431e+06	1.00143e+06	861979	670400	1.05357e+06	370901	711880	541577	607903	1
High	Master Protein	E9PU93	Set1/Ash2 histone methyltransferase complex subunit ASH2 [OS=Mus musculus]	0	13.975	7	3	26	3	534	60.1	6.95	227	30.26	3	3	Pf00622	23808	ENSMUSG00000031575.18	Ash2l	860204	788285	931021	735430	927211	975402	754897	764124	398332	449655	501440	687893	1
High	Master Protein	E9PU96	nucleolar pre-ribosomal-associated protein 1 [OS=Mus musculus]	0	14.683	2	3	26	3	2277	254.7	6.96	50	23.25	3	3	Pf11707	207932	ENSMUSG00000039929.14	Urb1	852658	1.11773e+06	899384	1.26336e+06	1.10109e+06	961177	748275	1.08348e+06	384796	772443	595475	677862	1
High	Master Protein	E9PUB0	Arf-GAP with Rho-GAP domain, ANK repeat and PH domain-containing protein 1 [OS=Mus musculus]	0	64.306	16	8	68	8	727	83.1	6.44	169	45.82	8	8	Pf00169, Pf00620, Pf00788	69710	ENSMUSG00000032812.18	Arap1	4.64862e+06	6.81591e+06	5.22056e+06	5.62716e+06	5.76157e+06	6.27794e+06	4.07953e+06	6.60701e+06	2.23359e+06	3.44055e+06	3.11588e+06	4.42746e+06	1
High	Master Protein	E9PUC2	long-chain-fatty-acid--CoA ligase 3 [OS=Mus musculus]	0	93.256	24	10	156	9	568	62.9	8.31	1208	124.92	9	10	Pf00501	74205	ENSMUSG00000032883.15	Acsl3	5.55692e+06	6.76986e+06	5.78499e+06	6.68556e+06	5.6511e+06	5.79388e+06	4.87664e+06	6.56237e+06	2.47507e+06	4.08767e+06	3.05614e+06	4.08609e+06	1
High	Master Protein	E9PUD2	Dynamin-1-like protein [OS=Mus musculus]	0	136.895	26	15	296	15	712	79.5	7.08	3108	284.62	15	15	Pf00350, Pf01031, Pf02212	74006	ENSMUSG00000022789.14	Dnm1l	1.4054e+07	1.75193e+07	1.52303e+07	1.54718e+07	1.73767e+07	1.65515e+07	1.23335e+07	1.69823e+07	6.51621e+06	9.45974e+06	9.3974e+06	1.16728e+07	1
High	Master Protein	E9PUG7	Eukaryotic translation initiation factor 2d [OS=Mus musculus]	0	4.689	3	1	2	1	552	60.8	7.75	0	2.19	1	1	Pf01253	16865	ENSMUSG00000026427.16	Eif2d	187889	209066	215800	218653	233659		164887	202658	92328.8	133689	126364		1
High	Master Protein	E9PUK3	Formin-binding protein 1-like [OS=Mus musculus]	0	6.242	2	1	6	1	551	63.9	6.27	78	4.39	1	1	Pf00018, Pf00611, Pf07653, Pf08239, Pf14604	214459	ENSMUSG00000039735.15	Fnbp1l	423214	377020	262503	453724	659425	488596	371404	365465	112310	277415	356620	344578	1
High	Master Protein	E9PUK6	Serine/arginine repetitive matrix protein 1 [OS=Mus musculus]	0	53.737	7	4	66	3	923	104.2	11.85	419	85.61	4	4	Pf01480, Pf15449	51796	ENSMUSG00000028809.16	Srrm1	2.99083e+06	3.92228e+06	3.60823e+06	4.66296e+06	3.47527e+06	3.96986e+06	2.62469e+06	3.80206e+06	1.54376e+06	2.85102e+06	1.87944e+06	2.79971e+06	1	Oxidation [K231]
High	Master Protein	E9PUM3	alpha-1,4 glucan phosphorylase [OS=Mus musculus]	0	163.786	25	15	248	8	754	87.5	8.51	1581	283.34	15	15	Pf00343		ENSMUSG00000032648.14; ENSMUSG00000106877.3		5.58848e+06	7.10558e+06	3.49805e+06	6.12425e+06	6.17463e+06	5.63431e+06	4.90434e+06	6.8878e+06	1.49662e+06	3.74448e+06	3.33927e+06	3973546	1	Oxidation [K593]
High	Master Protein	E9PUQ5	Golgin subfamily A member 2 [OS=Mus musculus]	0	32.504	6	4	24	4	1026	116.2	5.05	140	17.42	4	4	Pf12128, Pf15070	99412	ENSMUSG00000002546.16	Golga2	1.33917e+06	1.6371e+06	962176	1.42888e+06	1.76527e+06	1.40328e+06	1.17523e+06	1.58692e+06	411661	873641	954664	989649	1
High	Master Protein	E9PUX0	protein LYRIC [OS=Mus musculus]	0	39.959	26	4	74	4	164	18.2	9.8	1569	85.85	4	4			ENSMUSG00000022255.15		3.40125e+06	2.84422e+06	3.53827e+06	4.21297e+06	3.73718e+06	4.22017e+06	2.98487e+06	2.75705e+06	1.51383e+06	2.57588e+06	2.02108e+06	2.97624e+06	1
High	Master Protein	E9PV24	Fibrinogen alpha chain [OS=Mus musculus]	0	210.564	29	19	691	19	789	87.4	6.11	8342	907.08	19	19	Pf00147, Pf08702, Pf12160	14161	ENSMUSG00000028001.16	Fga	8.00129e+07	1.07269e+08	6.05605e+07	6.35442e+07	9.78525e+07	4.77883e+07	7.02177e+07	1.03981e+08	2.59105e+07	3.8852e+07	5.29191e+07	3.37023e+07	1
High	Master Protein	E9PV41	Protein diaphanous homolog 1 [OS=Mus musculus]	0	23.079	3	4	38	4	1264	140.3	5.58	195	26.76	4	4	Pf01576, Pf02181, Pf04111, Pf05266, Pf06367, Pf06371, Pf13166	13367	ENSMUSG00000024456.16	Diap1; Diaph1	1.99387e+06	2.31262e+06	1.84605e+06	1.45346e+06	1.30506e+06	1.40739e+06	1.74978e+06	2.24174e+06	789822	888673	705784	992551	1
High	Master Protein	E9PV44	ATPase inhibitor, mitochondrial [OS=Mus musculus]	0	8.316	12	1	31	1	74	8.8	9.31	222	37.79	1	1	Pf04568		ENSMUSG00000054428.12		4.5697e+06	3.96555e+06	2.80877e+06	3.05745e+06	4.45861e+06	4.75014e+06	4.01027e+06	3.84401e+06	1.20172e+06	1.86938e+06	2411234	3349993	1
High	Master Protein	E9PV45	Ubiquitin carboxyl-terminal hydrolase 24 [OS=Mus musculus]	0	25.407	3	6	50	6	2618	293.9	6.21	133	30.42	6	6	Pf00443, Pf13423		ENSMUSG00000028514.15		1.59759e+06	2.4171e+06	1.49643e+06	1.8644e+06	1.86279e+06	1.9061e+06	1.40202e+06	2.34302e+06	640240	1.13993e+06	1.0074e+06	1.34426e+06	1
High	Master Protein	E9PVA2	ribosomal rna-processing protein 8 [OS=Mus musculus]	0	7.349	3	1	4	1	503	56.5	9.95	68	1.74	1	1	Pf05148, Pf08241, Pf13489	101867	ENSMUSG00000030888.14	Rrp8	142972	190696	191778	242247	187805	255206	125469	184852	82050.9	148114	101566	179982	1
High	Master Protein	E9PVA8	eIF-2-alpha kinase activator GCN1 [OS=Mus musculus]	0	379.237	20	50	567	49	2671	292.8	7.36	4707	560.07	50	48	Pf12074, Pf13646	231659	ENSMUSG00000041638.18	Gcn1l1	5.14201e+07	5.89644e+07	4.78652e+07	5.05345e+07	5.28231e+07	5.53062e+07	4.51252e+07	5.71572e+07	2.04788e+07	3.08977e+07	2.85669e+07	3.90042e+07	1
High	Master Protein	E9PVM9	Lysosomal thioesterase PPT2 [OS=Mus musculus]	0	4.189	14	1	3	1	102	11.5	7.59	0	2.04	1	1			ENSMUSG00000015474.16		2.71186e+06	2.81939e+06	9.38182e+06	5.03159e+06	5.5049e+06	2.72675e+06	2.37987e+06	2.73298e+06	4013959	3076405	2.97707e+06	1.92301e+06	1
High	Master Protein	E9PVU0	Unconventional myosin-VI [OS=Mus musculus]	0	822.984	49	54	1642	54	1266	146.2	8.47	23983	2393.75	54	54	Pf00063		ENSMUSG00000033577.18		1.79005e+08	1.70631e+08	2.35195e+08	1.84333e+08	1.9204e+08	2.78962e+08	1.57092e+08	1.65401e+08	1.00627e+08	1.12704e+08	1.03856e+08	1.96735e+08	1
High	Master Protein	E9PVW8	Receptor-type tyrosine-protein phosphatase delta [OS=Mus musculus]	0	15.796	2	3	28	1	1506	169.3	6.71	166	15.67	3	3	Pf00041, Pf00047, Pf00102, Pf07679, Pf13895, Pf13927, Pf14566		ENSMUSG00000028399.18		364795	536147	276783	297886	301771	327049	320136	519715	118420	182133	163199	230648	1
High	Master Protein	E9PVX6	Proliferation marker protein Ki-67 [OS=Mus musculus]	0	32.981	3	6	26	6	3177	350.7	9.72	119	5.13	6	6	Pf00498, Pf08065, Pf15276	17345	ENSMUSG00000031004.8	Mki67	1.01711e+06	733769	1.27532e+06	1.30259e+06	1.14769e+06	1.10325e+06	892599	711279	545637	796425	620678	778060	1	Oxidation [P1240]
High	Master Protein	E9PW03	Glycosylphosphatidylinositol anchor attachment 1 protein [OS=Mus musculus]	0	35.894	11	6	80	6	561	61.4	8.1	629	75.33	6	6	Pf04114		ENSMUSG00000022561.12		3.64051e+06	4.49405e+06	4.07891e+06	4.17168e+06	4.43776e+06	3.02804e+06	3.19483e+06	4.35631e+06	1.74514e+06	2.55064e+06	2.39996e+06	2.1355e+06	1
High	Master Protein	E9PWE8	Dihydropyrimidinase-related protein 3 [OS=Mus musculus]	0	126.519	26	13	326	10	683	73.8	6.46	3718	392.23	13	12	Pf01979, Pf04909, Pf13147, Pf13594	22240	ENSMUSG00000024501.19	Dpysl3	9.38832e+06	9.97906e+06	8.43837e+06	9.59067e+06	8.55155e+06	1.02173e+07	8.239e+06	9.67321e+06	3.61031e+06	5.86391e+06	4.62472e+06	7.20568e+06	1
High	Master Protein	E9PWG6	Non-SMC condensin I complex, subunit G [OS=Mus musculus]	0	116.892	13	10	134	10	1004	112.8	5.55	1642	156.94	10	10	Pf12719, Pf13646	54392	ENSMUSG00000015880.13	Ncapg	7.3879e+06	8.09822e+06	8.28536e+06	7.68763e+06	7.21855e+06	7.28408e+06	6.48347e+06	7.85001e+06	3.54484e+06	4.70036e+06	3.90383e+06	5.13703e+06	1
High	Master Protein	E9PWY9	Phenylalanine--tRNA ligase alpha subunit [OS=Mus musculus]	0	160.297	31	11	206	11	507	57.4	8.02	2757	285.53	11	11	Pf00152, Pf01409, Pf08279		ENSMUSG00000003808.18		2.97308e+07	3.16839e+07	2.88862e+07	3.28726e+07	2.94336e+07	3.09035e+07	2.60911e+07	3.07128e+07	1.23588e+07	2.00989e+07	1.59178e+07	2.17944e+07	1
High	Master Protein	E9PX30	Mitogen-activated protein kinase kinase kinase kinase [OS=Mus musculus]	0	19.716	3	3	43	3	847	94.9	7.91	96	21.36	3	3	Pf00069, Pf00780, Pf07714		ENSMUSG00000034761.15		1.36274e+06	1.81635e+06	1.52631e+06	1.57051e+06	1.58276e+06	1.58202e+06	1.19592e+06	1.76068e+06	653022	960240	855963	1.1157e+06	1
High	Master Protein	E9PX53	Serine/threonine-protein phosphatase 4 regulatory subunit 1 [OS=Mus musculus]	0	25.167	5	5	38	5	934	104.4	4.86	150	19.75	5	5	Pf15017	70351	ENSMUSG00000061950.17	Ppp4r1	2.78879e+06	2.87954e+06	2.00722e+06	3.08014e+06	3.16085e+06	2.75512e+06	2.44739e+06	2.79128e+06	858779	1.88325e+06	1.7094e+06	1.94303e+06	1
High	Master Protein	E9PXP7	Stonin-2 [OS=Mus musculus]	0.006	2.34	2	1	3	1	898	99.8	5.48	0	0	1	1	Pf00928, Pf12016		ENSMUSG00000020961.14		143419	178187	189084	150622	190355	187871	125861	172725	80898.4	92093.3	102945	132495	1
High	Master Protein	E9PXX7	Thioredoxin domain-containing protein 5 [OS=Mus musculus]	0	242.113	55	15	471	15	344	38.5	5.39	7149	760.41	15	15	Pf00085, Pf07449, Pf13098, Pf13905	105245	ENSMUSG00000038991.16	Txndc5	6.31789e+07	6.1526e+07	7.40744e+07	7.39171e+07	6.98675e+07	7.25095e+07	5.54445e+07	5.96403e+07	3.16923e+07	4.51943e+07	3.77847e+07	5.11367e+07	1	Oxidation [K18]
High	Master Protein	E9PXY8	Ubiquitin carboxyl-terminal hydrolase 7 [OS=Mus musculus]	0	111.907	16	15	166	15	1143	132.8	5.66	1240	164.34	15	14	Pf00443, Pf00917, Pf12436, Pf13423, Pf14533	252870	ENSMUSG00000022710.17	Usp7	1.4033e+07	1.32758e+07	1.14134e+07	1.5766e+07	9.29142e+06	1.22693e+07	1.23151e+07	1.28689e+07	4.88316e+06	9.63962e+06	5.02484e+06	8.6528e+06	1
High	Master Protein	E9PY39	predicted gene 20431 [OS=Mus musculus]	0	48.006	16	7	197	2	371	42.1	6.76	1803	199.25	7	7	Pf00179, Pf10520		ENSMUSG00000089739.2		1.84889e+07	2.26282e+07	1.88536e+07	1.7931e+07	2.235e+07	2.58344e+07	1.62255e+07	2.19347e+07	8.06641e+06	1.09633e+07	1.2087e+07	1.82195e+07	1
High	Master Protein	E9PY45	Mitochondrial glutamate carrier 1 [OS=Mus musculus]	0.002	3.16	4	1	38	1	222	23.9	9.61	230	25.49	1	1	Pf00153		ENSMUSG00000019082.18		3.84328e+06	5.32681e+06	3.7519e+06	3.45457e+06	4.11368e+06	5.41929e+06	3.37278e+06	5.16355e+06	1.60523e+06	2.11218e+06	2.2247e+06	3821910	1
High	Master Protein	E9PYG6	RAS p21 protein activator 1 [OS=Mus musculus]	0	15.967	2	2	8	2	1038	115.4	6.6	43	8.68	2	2	Pf00017, Pf00018, Pf00168, Pf00169, Pf00616, Pf14604	218397	ENSMUSG00000021549.13	Rasa1	945537	1.24887e+06	1.37688e+06	1.35763e+06	1.58173e+06	1.16005e+06	829784	1210592	589091	830081	855407	818112	1
High	Master Protein	E9PYH0	Versican core protein [OS=Mus musculus]	0	79.069	4	10	119	10	3354	366.7	4.63	1643	124.83	9	10	Pf00008, Pf00059, Pf00084, Pf00193, Pf07645, Pf07974, Pf12947, Pf14670	13003	ENSMUSG00000021614.16	Vcan	7.82446e+06	7.70325e+06	9.80339e+06	9.30523e+06	8.18032e+06	7.30884e+06	6866584	7.46715e+06	4.19432e+06	5.68938e+06	4.42395e+06	5.15449e+06	1
High	Master Protein	E9PYH2	cytosolic acyl coenzyme A thioester hydrolase [OS=Mus musculus]	0	45.577	10	3	30	3	384	42.8	8.68	249	36.33	3	3	Pf03061	70025	ENSMUSG00000028937.14	Acot7	3.24694e+06	4.5402e+06	3.65019e+06	4.41033e+06	5.4312e+06	4.83083e+06	2.84945e+06	4.40104e+06	1.56171e+06	2.69656e+06	2.93722e+06	3.4069e+06	1
High	Master Protein	E9PYH6	SET domain-containing 1A [OS=Mus musculus]	0.001	3.51	1	1	2	1	1716	185.9	5.06	26	0	1	1	Pf00076, Pf00856, Pf11764, Pf14259	233904	ENSMUSG00000042308.14	Setd1a	247547	294658	313698	330913	254713	251835	217242	285627	134214	202326	137750	177604	1
High	Master Protein	E9PYI8	Ubiquitin carboxyl-terminal hydrolase 14 [OS=Mus musculus]	0	120.291	26	9	218	9	458	52.3	5.66	2872	280.18	9	8	Pf00443, Pf13423	59025	ENSMUSG00000047879.16	Usp14	1.61529e+07	1.82746e+07	1.9263e+07	1.79704e+07	1.86046e+07	1.76244e+07	1.41754e+07	1.77145e+07	8.24157e+06	1.09874e+07	1.00615e+07	1.24295e+07	1
High	Master Protein	E9PYK3	poly [ADP-ribose] polymerase [OS=Mus musculus]	0.004	2.551	0	1	2	1	1969	216	6.07	25	1.62	1	1	Pf00092, Pf00533, Pf00644, Pf06346, Pf08487, Pf13519, Pf13757, Pf13768	328417	ENSMUSG00000054509.7	Parp4	129460	152762	244673	200496		169129	113611	148080	104682	122587		119277	1
High	Master Protein	E9PYV1	Glucocorticoid receptor [OS=Mus musculus]	0	11.31	2	1	2	1	793	87.3	6.49	40	2.36	1	1	Pf00104, Pf00105, Pf02155	14815	ENSMUSG00000024431.14	Nr3c1	118025	122051		157315	182554	194634	103576	118310		96185.1	98726	137264	1
High	Master Protein	E9PYX1	Harmonin [OS=Mus musculus]	0	24.162	4	2	16	2	891	100.2	7.21	275	21.32	2	1	Pf00595, Pf13180	72088	ENSMUSG00000030838.17	Ush1c	358913	428092	512228			591611	314974	414971	219154			417228	1
High	Master Protein	E9PYX3	non-specific serine/threonine protein kinase [OS=Mus musculus]	0.009	2.132	1	1	5	1	716	80.2	9.72	0	0	1	1	Pf00069, Pf00627, Pf02149, Pf07714, Pf14531		ENSMUSG00000024969.15		495226	451623	493744	550242	416088	419407	434600	437781	211246	336428	225022	295783	1
High	Master Protein	E9PYX7	Afadin [OS=Mus musculus]	0	70.101	7	9	99	9	1663	188.8	6.42	192	42.16	9	9	Pf00498, Pf00595, Pf00788, Pf01843		ENSMUSG00000068036.14		4.61993e+06	5.48869e+06	5.73825e+06	6.25826e+06	4.58504e+06	3.37049e+06	4.05436e+06	5.32047e+06	2.45508e+06	3.82641e+06	2.47961e+06	2.37701e+06	1
High	Master Protein	E9PYZ7	RNA-binding protein 26 [OS=Mus musculus]	0	29.893	6	5	32	5	1009	113.7	9.16	337	30.77	5	5	Pf00076, Pf00642, Pf01480, Pf13893, Pf14259		ENSMUSG00000022119.15		2.04302e+06	1.86202e+06	2.33674e+06	2.1569e+06	1.79519e+06	1.8327e+06	1.79291e+06	1.80495e+06	999760	1.31877e+06	970849	1.2925e+06	1
High	Master Protein	E9PZ16	Basement membrane-specific heparan sulfate proteoglycan core protein [OS=Mus musculus]	0	844.8	24	65	1038	16	4383	469.5	6.47	12003	1469.58	64	65	Pf00008, Pf00047, Pf00052, Pf00053, Pf00054, Pf00057, Pf02210, Pf07679, Pf07686, Pf12785, Pf13385, Pf13895, Pf13927	15530	ENSMUSG00000028763.17	Hspg2	6.99468e+07	7.94026e+07	6.32074e+07	7.49353e+07	7.8216e+07	8.62118e+07	6.13839e+07	7.6969e+07	2.70429e+07	4.58168e+07	4.22995e+07	6.08001e+07	1	Oxidation [P1766; K1768; P1769]
High	Master Protein	E9PZ26	Bromodomain-containing 1 [OS=Mus musculus]	0	4.182	1	1	4	1	1189	133.3	8.59	0	0	1	1	Pf00439, Pf00628, Pf00855, Pf10513, Pf13771, Pf13831, Pf13832	223770	ENSMUSG00000022387.16	Brd1	188475	226353	131859	106369		231910	165401	219415	56415.2	65036.1		163553	1
High	Master Protein	E9PZ92	Exocyst complex component 5 [OS=Mus musculus]	0	9.13	3	2	40	2	643	74.2	6.99	153	13.86	2	2	Pf06810, Pf07393		ENSMUSG00000061244.13		538605	770763	490039	585943	668375	717635	472669	747140	209660	358256	361460	506106	1
High	Master Protein	E9PZA7	Transformation/transcription domain-associated protein [OS=Mus musculus]	0	84.817	4	15	70	15	3829	433.8	8.24	228	28.96	15	15	Pf00454, Pf02259, Pf02260		ENSMUSG00000045482.16		5.04463e+06	5.11083e+06	6.61619e+06	6.8693e+06	6.40395e+06	4.43389e+06	4.42706e+06	4.95419e+06	2.8307e+06	4.20001e+06	3.46329e+06	3.12696e+06	1
High	Master Protein	E9PZF0	Nucleoside diphosphate kinase [OS=Mus musculus]	0	169.81	54	10	806	3	267	30.2	8.72	9428	1043.13	10	10	Pf00334		ENSMUSG00000091228.1		2.05759e+08	2.94625e+08	1.9591e+08	2.15143e+08	2.58447e+08	3.07654e+08	1.8057e+08	2.85595e+08	8.38191e+07	1.31543e+08	1.39769e+08	2.1697e+08	1
High	Master Protein	E9PZJ8-1	Activating signal cointegrator 1 complex subunit 3 [OS=Mus musculus]	0	13.91	2	3	8	3	2198	250.4	7.02	40	4.72	3	3	Pf00270, Pf00271, Pf02889	77987	ENSMUSG00000038774.9	Ascc3	807517	1.39583e+06	742066	998184	820741	888811	708660	1.35305e+06	317489	610308	443861	626826	1
High	Master Protein	E9PZS5	Nuclease EXOG, mitochondrial [OS=Mus musculus]	0	5.315	5	1	4	1	392	43.6	7.94	0	0	1	1	Pf01223	208194	ENSMUSG00000042787.14	Exog	386634	357037	400413	452623	307235	435132	339302	346094	171314	276742	166154	306873	1
High	Master Protein	E9Q035	predicted gene 20425 [OS=Mus musculus]	0	1136.93	55	59	4384	8	978	107.7	7.77	67569	6510.11	59	59	Pf00009, Pf00025, Pf00405, Pf01926, Pf09439, Pf12974		ENSMUSG00000090639.1		1.77507e+09	1.62329e+09	1.76431e+09	1.52483e+09	1.53651e+09	1.01702e+09	1.55776e+09	1.57353e+09	7.54851e+08	9.32308e+08	8.30951e+08	7.17241e+08	1	Oxidation [P471; P553; K558; K668]
Medium	Master Protein	E9Q0B5	Fc fragment of IgG-binding protein [OS=Mus musculus]	0.01	1.97	0	1	52	1	2583	275	5.03	56	42.31	1	1	Pf00094, Pf01826, Pf08742, Pf12714		ENSMUSG00000047730.17		1.91078e+07	3.30504e+07	1.48445e+08	1.95989e+07	1.41005e+07	2.76386e+07	16768582	32037398	63511176	11983121	7.62563e+06	19491880	1
Medium	Master Protein	E9Q0J2	Ral GTPase-activating protein subunit beta [OS=Mus musculus]	0.024	1.445	1	1	2	1	1507	167.8	6.79	17	0	1	1	Pf02145	228850	ENSMUSG00000027652.15	Ralgapb	135506	179431	110687	145578	114672	144675	118917	173932	47356.8	89009	62014.9	102031	1
High	Master Protein	E9Q0N0	Intersectin-1 [OS=Mus musculus]	0	19.157	4	4	16	4	1719	194.8	7.91	60	10.12	4	3	Pf00018, Pf00168, Pf00169, Pf00621, Pf02050, Pf02463, Pf02841, Pf03357, Pf03938, Pf04111, Pf04156, Pf04502, Pf04709, Pf05262, Pf05557, Pf06818, Pf07111, Pf07653, Pf07888, Pf09726, Pf09731, Pf09756, Pf10037, Pf10174, Pf10186, Pf11559, Pf11600, Pf12072, Pf12128, Pf12763, Pf13868, Pf14604, Pf14915, Pf15346, Pf15558, Pf15619	16443	ENSMUSG00000022957.19	Itsn1	936477	1.1613e+06	1.02301e+06	1.39574e+06	1.30524e+06	1.20696e+06	821833	1.12571e+06	437690	853382	705882	851195	1
High	Master Protein	E9Q0U7	Heat shock protein 105 kDa [OS=Mus musculus]	0	169.221	23	16	294	13	817	91.6	5.59	3433	370.87	16	16	Pf00012		ENSMUSG00000029657.15		2.50449e+07	2.17741e+07	3.06094e+07	2.79266e+07	2.65741e+07	2.72819e+07	2.19789e+07	2.11067e+07	1.30961e+07	1.70749e+07	1.43714e+07	1.92403e+07	1
High	Master Protein	E9Q179	G-rich sequence factor 1 [OS=Mus musculus]	0	25.721	6	2	20	2	362	41.6	5.33	255	22.18	2	2	Pf00076, Pf14259	231413	ENSMUSG00000044221.14	Grsf1	426772	589685	923399	779522	793153	737768	374526	571611	395071	476614	428941	520305	1
High	Master Protein	E9Q1G8	Septin-7 [OS=Mus musculus]	0	390.534	53	22	605	21	437	50.6	8.57	5678	913.18	21	22	Pf00735, Pf01926, Pf05368	235072	ENSMUSG00000001833.17	Sept7	7.73171e+07	9.76768e+07	9.72286e+07	8.44533e+07	9.60622e+07	9.84896e+07	6.78519e+07	9.4683e+07	4.15987e+07	5.16363e+07	5.19509e+07	6.9459e+07	1
High	Master Protein	E9Q1M6	Ankyrin repeat and KH domain-containing 1 [OS=Mus musculus]	0	13.007	1	3	10	1	2485	263.2	5.92	55	9.35	3	3	Pf00013, Pf00023, Pf12796, Pf13014, Pf13606, Pf13637, Pf13857		ENSMUSG00000024483.18		506972	630636	632538	584898	572349	486271	444909	611308	270628	357617	309529	342938	1
High	Master Protein	E9Q1P8	Interferon regulatory factor 2-binding protein 2 [OS=Mus musculus]	0	4.228	8	2	6	2	570	59.3	8.69	14	2.68	2	2	Pf11261	270110	ENSMUSG00000051495.7	Irf2bp2	474975	622038	562434	475529	442615	602825	416828	602973	240634	290747	239368	425137	1
High	Master Protein	E9Q1R2	4-hydroxy-2-oxoglutarate aldolase, mitochondrial [OS=Mus musculus]	0	39.136	30	4	58	4	158	17.4	8.18	484	31.89	4	4	Pf00701		ENSMUSG00000025176.14		1.78371e+06	2.58299e+06	1.32736e+06	1.79755e+06	2.22217e+06	2.75451e+06	1.56535e+06	2.50383e+06	567902	1.09905e+06	1.20176e+06	1.9426e+06	1
High	Master Protein	E9Q1S3	protein transport protein Sec23A [OS=Mus musculus]	0	285.138	39	23	444	20	736	82.9	7.46	6275	666.79	23	23	Pf00626, Pf04810, Pf04811, Pf04815, Pf08033		ENSMUSG00000020986.13		5.07811e+07	4.62247e+07	4.78262e+07	4.38481e+07	4.94022e+07	4.60204e+07	4.45645e+07	4.48079e+07	2.04621e+07	2.68095e+07	2.67169e+07	3.24555e+07	1
High	Master Protein	E9Q1V3	Dihydroorotate dehydrogenase (Quinone), mitochondrial [OS=Mus musculus]	0	23.389	12	2	32	2	277	30.3	9.63	509	49.58	2	2	Pf01180		ENSMUSG00000031730.18		1.06677e+06	1.47714e+06	1.37736e+06	1.56389e+06	1.60661e+06	1.61733e+06	936179	1.43187e+06	589295	956188	868862	1.14061e+06	1
High	Master Protein	E9Q1W0	Calcium/calmodulin-dependent protein kinase type II subunit delta [OS=Mus musculus]	0	38.716	9	4	83	2	512	57.7	7.15	608	60.15	4	4	Pf00069, Pf07714, Pf08332, Pf12680, Pf13474, Pf14534	108058	ENSMUSG00000053819.16	Camk2d	864563	1.26441e+06	1.00507e+06	1.23705e+06	1.7537e+06	1.26646e+06	758722	1.22566e+06	430014	756353	948411	893160	1
High	Master Protein	E9Q1X8	Voltage-dependent calcium channel subunit alpha-2/delta-1 [OS=Mus musculus]	0	6.161	2	2	10	2	1091	123.1	5.17	20	3.34	2	2	Pf00092, Pf02743, Pf08399, Pf08473, Pf13519, Pf13768		ENSMUSG00000040118.15		149185		125521	117520	257614	159690	130922		53703.3	71853.9	139319	112620	1
High	Master Protein	E9Q1Y9	Keratin 83 [OS=Mus musculus]	0	35.32	11	8	102	2	479	52.8	5.74	177	82.32	8	8	Pf00038, Pf01576, Pf05557, Pf05911, Pf07888, Pf07926, Pf11559, Pf13514	100126226	ENSMUSG00000067613.5	5430421N21Rik; Krt83	1.43616e+07	1.02606e+07	2.94876e+07	6.46935e+06	7.65852e+06	3.27399e+06	1.26035e+07	9.94612e+06	1.26161e+07	3.95548e+06	4.14176e+06	2.30895e+06	1	Oxidation [K210; K211]
High	Master Protein	E9Q284	coilin [OS=Mus musculus]	0	8.414	2	1	10	1	573	62.2	9.06	151	14.11	1	1		12812	ENSMUSG00000033983.13	Coil	634877	472728	1.17425e+06	957799	1.20505e+06	1.10499e+06	557155	458239	502397	585616	651695	779284	1
High	Master Protein	E9Q2M3	Chromosome transmission fidelity protein 18 homolog [OS=Mus musculus]	0	4.426	5	1	6	1	365	40.8	4.83	0	0	1	1			ENSMUSG00000019214.13		304906	532330	208190	147960	210964	253689	267579	516015	89073	90465.6	114090	178912	1
High	Master Protein	E9Q2X6	Structural maintenance of chromosomes protein [OS=Mus musculus]	0	199.3	19	22	394	22	1261	144.1	7.58	3947	451.99	22	22	Pf02463, Pf06470, Pf13304, Pf13476, Pf13555		ENSMUSG00000034349.14		3.14147e+07	3.07858e+07	3.55906e+07	3.21882e+07	2.97469e+07	2.65513e+07	2.75689e+07	2.98423e+07	1.52272e+07	1.96805e+07	1.60872e+07	1.87251e+07	1
High	Master Protein	E9Q317	Histone deacetylase complex subunit SAP18 [OS=Mus musculus]	0	4.47	8	2	46	2	172	19.6	9.8	136	32.09	2	2	Pf06487	20220; 100041953	ENSMUSG00000021963.16; ENSMUSG00000061104.5	Sap18; Gm10094; Sap18b	6.68472e+06	5.96247e+06	9.12717e+06	6.4193e+06	7.1243e+06	9.79439e+06	5.86638e+06	5779726	3905005	3.92487e+06	3.85285e+06	6907408	1
High	Master Protein	E9Q360	Integrator complex subunit 10 [OS=Mus musculus]	0	58.919	12	7	38	7	736	84.8	7.33	550	38.22	7	7		70885	ENSMUSG00000031864.16	Ints10	2.84277e+06	3.63683e+06	2.81251e+06	2.96367e+06	2.77632e+06	3.24509e+06	2.49476e+06	3.52536e+06	1.20331e+06	1.81204e+06	1.50145e+06	2.28857e+06	1
High	Master Protein	E9Q3B1	RCC1 and BTB domain-containing protein 2 [OS=Mus musculus]	0	22.844	7	3	40	3	517	56.3	5.47	67	22.01	3	3	Pf00415, Pf00651, Pf13540		ENSMUSG00000022106.14		2.07131e+06	1.5983e+06	1.86284e+06	2.02517e+06	1.70788e+06	1.48077e+06	1.81774e+06	1.54931e+06	797005	1.23823e+06	923627	1044301	1
High	Master Protein	E9Q3E2	synaptopodin [OS=Mus musculus]	0	12.991	3	2	4	2	1100	117.4	9.64	0	0	2	2		104027	ENSMUSG00000043079.17	Synpo	521550	418670	491012	650254	421191	476703	457701	405839	210077	397577	227782	336190	1
High	Master Protein	E9Q3L2	phosphatidylinositol 4-kinase alpha [OS=Mus musculus]	0	6.731	1	2	20	2	2105	236.9	7.06	37	3.26	2	2	Pf00454, Pf00613	224020		Pi4ka	1.06913e+06	927362	782603	757576	1.11551e+06	1.06948e+06	938244	898939	334832	463196	603275	754244	1
High	Master Protein	E9Q3U1	ubiquitin-conjugating enzyme E2 H [OS=Mus musculus]	0	22.787	20	2	21	2	152	17.2	4.67	140	18.09	2	2	Pf00179	22214	ENSMUSG00000039159.16	Ube2h	1.06274e+06	800632	1.9045e+06	1.04978e+06	1.88635e+06	1.87282e+06	932635	776093	814831	641856	1.02015e+06	1.32079e+06	1
High	Master Protein	E9Q3Y4	Lipopolysaccharide-responsive and beige-like anchor protein [OS=Mus musculus]	0	137.399	7	15	181	15	2854	316.6	5.54	1093	111.56	15	15	Pf02138, Pf06469, Pf12719, Pf13385, Pf14844	80877	ENSMUSG00000028080.16	Lrba	7.79219e+06	9.9662e+06	7.52918e+06	8.27083e+06	8.53701e+06	7.65242e+06	6.83826e+06	9.66074e+06	3.22131e+06	5.05693e+06	4.61686e+06	5.3968e+06	1
High	Master Protein	E9Q3Z5	Supervillin [OS=Mus musculus]	0	110.503	9	13	138	13	2056	230.3	6.62	1493	116.63	13	13	Pf00626, Pf02209		ENSMUSG00000024236.18		3.41892e+06	3.56834e+06	4.76997e+06	5.06128e+06	4.65998e+06	5.2005e+06	3.00037e+06	3.45898e+06	2.04081e+06	3.09456e+06	2.52014e+06	3.66761e+06	1
High	Master Protein	E9Q411	neuroblastoma-amplified sequence [OS=Mus musculus]	0	16.394	1	2	33	2	2356	265.6	5.95	36	15.22	2	2	Pf08314, Pf15492	71169	ENSMUSG00000020576.9	Nbas	688297	829414	749839	728577	778471	764562	604035	803993	320814	445465	421000	539200	1
High	Master Protein	E9Q414	apolipoprotein B-100 [OS=Mus musculus]	0	453.686	14	54	567	54	4505	509.1	6.81	3938	463.32	53	54	Pf01347, Pf06448, Pf09172, Pf12491	238055	ENSMUSG00000020609.14	Apob	7.98331e+07	6.93143e+07	7.55188e+07	6.68953e+07	6.20281e+07	5.27775e+07	7.00599e+07	6.71899e+07	3.23103e+07	4.0901e+07	3.35451e+07	3.72209e+07	1	Oxidation [P1463]
High	Master Protein	E9Q450	Tropomyosin alpha-1 chain [OS=Mus musculus]	0	233.239	42	19	440	3	284	32.8	4.78	5375	596.69	19	18	Pf00261, Pf12718	22003	ENSMUSG00000032366.15	Tpm1	2.28804e+07	1.60423e+07	1.4332e+07	2.05539e+07	2.46166e+07	1.37333e+07	2.00794e+07	1.55506e+07	6.13184e+06	1.2567e+07	1.33128e+07	9.6853e+06	1
High	Master Protein	E9Q481	Serine/threonine-protein phosphatase 4 regulatory subunit 3A [OS=Mus musculus]	0	43.338	9	7	70	4	833	95.3	4.94	477	71.04	7	7	Pf04802	68734	ENSMUSG00000041846.14	Smek1; Ppp4r3a	5.41318e+06	4.64697e+06	3.85527e+06	4.64497e+06	5.53268e+06	4.29107e+06	4.75049e+06	4.50455e+06	1.64946e+06	2.84002e+06	2.9921e+06	3.02624e+06	1
High	Master Protein	E9Q4G8	CD166 antigen [OS=Mus musculus]	0	230.764	34	15	340	15	555	61.9	6.06	3364	448.16	15	15	Pf07679, Pf08205, Pf13895, Pf13927		ENSMUSG00000022636.13		2.39614e+07	2.49503e+07	2.57198e+07	2.72417e+07	2.6809e+07	2.69501e+07	2.10281e+07	2.41855e+07	1.10041e+07	1.66561e+07	1.44984e+07	1.90063e+07	1
High	Master Protein	E9Q4K7	Kinesin family member 13B [OS=Mus musculus]	0	17.256	3	4	20	4	1843	204.4	5.8	42	13.24	4	4	Pf00225, Pf00498, Pf01302, Pf07946, Pf11618, Pf12128, Pf12423, Pf12473	16554	ENSMUSG00000060012.7	Kif13b	1.02813e+06	1.68226e+06	1.406e+06	1.41192e+06	1.34803e+06	1.64951e+06	902264	1.6307e+06	601547	863272	729019	1163304	1
High	Master Protein	E9Q4P1	WD repeat and FYVE domain-containing protein 1 [OS=Mus musculus]	0	39.877	12	4	61	4	410	46.2	7.34	597	65.46	4	4	Pf00400, Pf01363	69368	ENSMUSG00000073643.11	Wdfy1	2.78338e+06	3.87938e+06	2.81319e+06	3.0739e+06	3.76936e+06	3.53986e+06	2.44264e+06	3.76048e+06	1.20361e+06	1.87944e+06	2.03849e+06	2.49645e+06	1
High	Master Protein	E9Q557	Desmoplakin [OS=Mus musculus]	0	61.547	4	11	61	11	2883	332.7	6.8	225	39.55	11	11	Pf00038, Pf00681, Pf01576, Pf02463, Pf04111, Pf04156, Pf05483, Pf05557, Pf05622, Pf06637, Pf06705, Pf07888, Pf10174, Pf12128	109620	ENSMUSG00000054889.9	Dsp	2.20708e+06	3.57672e+06	1.33241e+07	2.38802e+06	3.29147e+06	4.04919e+06	1.93689e+06	3.4671e+06	5.70065e+06	1.46008e+06	1.78004e+06	2.85566e+06	1
High	Master Protein	E9Q5K9-1	YTH domain-containing protein 1 [OS=Mus musculus]	0	16.837	5	4	44	4	736	85.6	6.16	138	33.47	4	4	Pf04146	231386	ENSMUSG00000035851.14	Ythdc1	5.40826e+06	5.09359e+06	7.13409e+06	6.37451e+06	6.34239e+06	5.63992e+06	4.74617e+06	4.93748e+06	3.05228e+06	3897488	3.42999e+06	3.97751e+06	1
High	Master Protein	E9Q5L2	inter alpha-trypsin inhibitor, heavy chain 4 [OS=Mus musculus]	0	12.967	2	1	19	1	925	102.8	6.37	106	16.59	1	1	Pf00092, Pf06668, Pf08487, Pf13519, Pf13768	16427	ENSMUSG00000021922.15	Itih4	467136	536270	401602	373298	662564	494879	409949	519834	171823	228241	358317	349009	1
High	Master Protein	E9Q616	AHNAK nucleoprotein (desmoyokin) [OS=Mus musculus]	0	559.912	31	52	631	52	5656	603.9	6.3	4602	638.4	51	51		66395	ENSMUSG00000069833.12	Ahnak	3.67299e+07	3.40539e+07	4.04643e+07	3.56573e+07	3.64198e+07	2.82227e+07	3.22334e+07	3.30102e+07	1.73124e+07	2.18015e+07	1.9696e+07	1.99038e+07	1
High	Master Protein	E9Q634	unconventional myosin-Ie [OS=Mus musculus]	0	97.263	18	16	206	15	1107	126.7	9.07	1192	181.9	16	16	Pf00018, Pf00063, Pf06017, Pf07653, Pf14604	71602	ENSMUSG00000032220.10	Myo1e	9.30885e+06	1.08804e+07	1.03572e+07	1.19184e+07	1.13953e+07	1.15214e+07	8.16925e+06	1.05469e+07	4.43127e+06	7.28714e+06	6.16262e+06	8.1254e+06	1
High	Master Protein	E9Q6L0	CLIP-associating protein 1 [OS=Mus musculus]	0	35.796	6	6	40	6	1452	160.1	8.68	243	31.14	6	6	Pf02985, Pf12348	76707	ENSMUSG00000064302.13	Clasp1	1.34102e+06	1.59799e+06	1.73052e+06	1.36753e+06	1.14502e+06	1.69066e+06	1.17685e+06	1.54901e+06	740393	836133	619231	1.19232e+06	1
High	Master Protein	E9Q6R4	AT-rich interactive domain 1B (SWI-like) [OS=Mus musculus]	0	8.319	1	2	27	2	2243	236.9	6.8	127	14.43	2	2	Pf01388, Pf12031		ENSMUSG00000069729.13		502199	542866	480861	518917	541196	522857	440719	526228	205733	317275	292682	368741	1
High	Master Protein	E9Q6R7	Utrophin [OS=Mus musculus]	0	182.944	7	20	211	19	3430	392.5	5.33	2023	215.12	20	20	Pf00307, Pf00397, Pf00435, Pf00569, Pf09068, Pf09069, Pf11971	22288	ENSMUSG00000019820.10	Utrn	8.92586e+06	1.18211e+07	9.58852e+06	1.07738e+07	1.06517e+07	9.37267e+06	7.83315e+06	1.14588e+07	4.10239e+06	6.58728e+06	5.7605e+06	6.60999e+06	1
High	Master Protein	E9Q7E2	AT-rich interactive domain 2 (ARID, RFX-like) [OS=Mus musculus]	0	25.247	4	6	41	6	1828	195.9	7.47	57	20	6	5	Pf01388, Pf02257, Pf09770	77044	ENSMUSG00000033237.18	Arid2	2.20484e+06	2.33525e+06	2.57012e+06	2.67647e+06	2.76443e+06	2.62976e+06	1.93492e+06	2.26368e+06	1.09961e+06	1.63644e+06	1.49501e+06	1.85461e+06	1
High	Master Protein	E9Q7G0	nuclear mitotic apparatus protein 1 [OS=Mus musculus]	0	557.558	29	43	765	43	2094	235.5	5.87	8505	1025.42	43	43	Pf04111, Pf09726, Pf12128, Pf14992	101706	ENSMUSG00000066306.13	Numa1	5.15784e+07	5.13167e+07	5.49371e+07	5.27584e+07	4.68569e+07	3.9105e+07	4.52642e+07	4.97439e+07	2.35045e+07	3.22574e+07	2.53404e+07	2.75785e+07	1
High	Master Protein	E9Q7G1	Transmembrane p24-trafficking protein 7 [OS=Mus musculus]	0	107.748	35	6	246	6	188	21.3	6.2	3613	381.66	6	6	Pf01105		ENSMUSG00000033184.14		2.17638e+07	2.48993e+07	1.93882e+07	2.65758e+07	2.66052e+07	2.68037e+07	1.90995e+07	2.41361e+07	8.29512e+06	1.62489e+07	1.43882e+07	1.89031e+07	1
Medium	Master Protein	E9Q7S1	Zinc finger protein 106 [OS=Mus musculus]	0.011	1.943	1	1	2	1	1865	205.6	7.47	14	0	1	1	Pf00400		ENSMUSG00000027288.16		298667	225650	244361	277721	281974	260940	262104	218734	104548	169804	152493	184026	1
High	Master Protein	E9Q7W0	Recombining-binding protein suppressor of hairless [OS=Mus musculus]	0	27.382	12	5	60	5	485	54.3	8.02	275	37.49	5	5	Pf09270, Pf09271	19664	ENSMUSG00000039191.12	Rbpj	3.22817e+06	3.71991e+06	3.88614e+06	4.13591e+06	3.86109e+06	3.98379e+06	2.83297e+06	3.60589e+06	1.66266e+06	2.52877e+06	2.0881e+06	2.80953e+06	1
High	Master Protein	E9Q804	Ankyrin repeat domain-containing protein 17 [OS=Mus musculus]	0	30.114	2	5	20	3	2602	274	6.52	268	22.37	5	5	Pf00013, Pf00023, Pf12796, Pf13014, Pf13606, Pf13637, Pf13857	81702	ENSMUSG00000055204.15	Ankrd17	1.62709e+06	1.73498e+06	1.89437e+06	1.77739e+06	1.12419e+06	1.64219e+06	1.4279e+06	1.6818e+06	810496	1.08673e+06	607968	1.15814e+06	1
High	Master Protein	E9Q8D0	DnaJ homolog subfamily C member 21 [OS=Mus musculus]	0	5.651	3	1	6	1	531	61.7	5.9	17	1.66	1	1	Pf00226, Pf12171, Pf12874, Pf13892	78244	ENSMUSG00000044224.16	Dnajc21	139219	231755	335231	356299	452573	345197	122175	224651	143427	217847	244753	243447	1
High	Master Protein	E9Q8K5	Titin [OS=Mus musculus]	0.009	2.129	0	2	3	2	33467	3713.7	6.37	0		2		Pf00041, Pf00047, Pf00069, Pf07679, Pf07686, Pf07714, Pf09042, Pf13895, Pf13927		ENSMUSG00000051747.14		416234	572941	518304	686213	503886	546884	365278	555380	221753	419563	272504	385685	1	Oxidation [P6386; P10691; K10692; P10696; K10698]
High	Master Protein	E9Q8T1	Transforming acidic coiled-coil-containing protein 2 [OS=Mus musculus]	0	3.633	1	2	6	2	2879	305	4.79	23	0	2	2	Pf01576, Pf02463, Pf05010, Pf05816, Pf06160, Pf07926, Pf08598, Pf09728, Pf09731, Pf12037, Pf12128, Pf13851, Pf13863, Pf13868, Pf15272, Pf15346	57752	ENSMUSG00000030852.17	Tacc2	104011	129089	105720	300423	209698	115852	91278	125132	45231.7	183684	113405	81703.6	1
High	Master Protein	E9Q905	Catenin delta-1 [OS=Mus musculus]	0	303.339	31	20	441	20	866	96.6	6.24	6089	628.19	20	20	Pf00514	12388	ENSMUSG00000034101.14	Ctnnd1	5.29781e+07	6.97738e+07	6.61234e+07	7.51384e+07	6.01083e+07	7.26917e+07	4.64925e+07	6.76353e+07	2.82905e+07	4.5941e+07	3.25068e+07	5.12652e+07	1
High	Master Protein	E9Q933	Transmembrane protein 11, mitochondrial [OS=Mus musculus]	0	10.197	14	2	4	2	176	19.8	6.25	0	2.4	2	1	Pf14972	216821	ENSMUSG00000043284.12	Tmem11	1.04129e+06	1.71639e+06	1.23972e+06	1.53714e+06	1.38141e+06	1.82499e+06	913819	1.66378e+06	530407	939834	747074	1.28706e+06	1
High	Master Protein	E9Q9C7	Actin-binding LIM protein 1 [OS=Mus musculus]	0	14.042	3	2	9	2	668	75.2	8.09	110	5.87	2	2	Pf00412, Pf02209	226251	ENSMUSG00000025085.16	Ablim1	197709	228185	203300	194983	215862	301727	173505	221191	86980.9	119216	116739	212790	1
High	Master Protein	E9Q9E1	eukaryotic translation initiation factor 4 gamma 1 [OS=Mus musculus]	0	353.943	20	29	651	24	1593	175.2	5.38	7175	777.74	29	29	Pf00566, Pf02020, Pf02847, Pf02854	208643	ENSMUSG00000045983.15	Eif4g1	5.9676e+07	6.77114e+07	6.97369e+07	6.733e+07	5.90603e+07	6.03477e+07	5.23704e+07	6.56361e+07	2.98365e+07	4.11668e+07	3.19401e+07	4.25597e+07	1
High	Master Protein	E9Q9E4	Cyclin-dependent kinase 4 [OS=Mus musculus]	0	56.041	36	7	108	6	253	28	7.09	1313	152.96	6	7	Pf00069, Pf07714		ENSMUSG00000006728.12		4.37715e+06	6.10361e+06	4.28391e+06	5.13063e+06	4.74261e+06	5.55273e+06	3.84129e+06	5.91654e+06	1.83285e+06	3.13696e+06	2.56483e+06	3.91602e+06	1
High	Master Protein	E9Q9H3	dnaJ homolog subfamily C member 2 [OS=Mus musculus]	0	53.911	14	7	74	7	619	71.2	8.24	447	78.67	7	7	Pf00226, Pf00249		ENSMUSG00000029014.14		3.07147e+06	3.46535e+06	3.0988e+06	3.69466e+06	3.19178e+06	3.42802e+06	2.69546e+06	3.35914e+06	1.32581e+06	2.25898e+06	1.72613e+06	2.41758e+06	1
High	Master Protein	E9Q9M1	Cytosolic purine 5'-nucleotidase [OS=Mus musculus]	0	39.981	10	5	98	5	586	67.7	6.74	272	65.94	5	5	Pf05761	76952	ENSMUSG00000025041.16	Nt5c2	3.14312e+06	3.51665e+06	2.84702e+06	3.45892e+06	3.21688e+06	3.04784e+06	2.75834e+06	3.40887e+06	1.21808e+06	2.11485e+06	1.7397e+06	2.14946e+06	1
High	Master Protein	E9Q9X1	dystonin [OS=Mus musculus]	0	7.995	0	2	4	2	7406	835.2	5.31	24	1.99	2	2	Pf00036, Pf00307, Pf00435, Pf00681, Pf02187, Pf02463, Pf06008, Pf11971, Pf12128, Pf13499, Pf13514, Pf13833		ENSMUSG00000026131.18		152864	268558	247247	196265	305083	227368	134150	260327	105783	120000	164990	160349	1
High	Master Protein	E9QAI5	CAD protein [OS=Mus musculus]	0	522.131	29	49	978	49	2162	236.1	6.49	11886	1247.22	49	49	Pf00117, Pf00185, Pf00289, Pf00988, Pf01071, Pf01979, Pf02142, Pf02222, Pf02729, Pf02786, Pf02787, Pf07478, Pf07722, Pf08443, Pf13147, Pf13535, Pf13594, Pf15632		ENSMUSG00000013629.16		1.73702e+08	1.42589e+08	1.6888e+08	1.60678e+08	1.575e+08	1.26354e+08	1.52437e+08	1.38219e+08	7.22543e+07	9.82412e+07	8.51767e+07	8.91099e+07	1	Oxidation [P531; P1816]
High	Master Protein	E9QAQ5	Glycogen synthase kinase-3 beta [OS=Mus musculus]	0	46.001	18	5	69	5	433	48	8.78	479	96.55	5	5	Pf00069, Pf01636, Pf07714, Pf14531	56637	ENSMUSG00000022812.13	Gsk3b	4.46287e+06	4.9105e+06	3.98883e+06	4.69026e+06	4.69554e+06	4.83243e+06	3.91652e+06	4.76e+06	1.7066e+06	2.86771e+06	2.53937e+06	3.40803e+06	1
High	Master Protein	E9QAS7	inositol polyphosphate-5-phosphatase A [OS=Mus musculus]	0.001	3.178	2	1	18	1	422	48.8	7.09	0	0	1	1		212111	ENSMUSG00000025477.14	Inpp5a	316904	322676	294911	381268	327445	383627	278109	312786	126176	233114	177084	270550	1
High	Master Protein	E9QAX2	Unconventional myosin-XVIIIa [OS=Mus musculus]	0	459.023	27	44	688	44	2083	235.7	6.07	8546	895.12	44	44	Pf00038, Pf00063, Pf00595, Pf00769, Pf01496, Pf01576, Pf02463, Pf02841, Pf03962, Pf04111, Pf04156, Pf04502, Pf05483, Pf05557, Pf05622, Pf05667, Pf05701, Pf05911, Pf05914, Pf06160, Pf07111, Pf07888, Pf08286, Pf09726, Pf09728, Pf09730, Pf09755, Pf09787, Pf10174, Pf12128, Pf12329, Pf13166, Pf13514, Pf13654, Pf13851, Pf14915, Pf15070, Pf15397	360013	ENSMUSG00000000631.20	Myo18a	3.78829e+07	4.55252e+07	3.79587e+07	4.7046e+07	4.20988e+07	4.44043e+07	3.32453e+07	4.41298e+07	1.62404e+07	2.87648e+07	2.27672e+07	3.13158e+07	1
High	Master Protein	E9QAZ2	ribosomal protein L15 [OS=Mus musculus]	0	146.298	46	11	409	11	204	24.1	11.58	4623	582.53	11	11	Pf00827		ENSMUSG00000057262.1		1.84434e+08	1.85475e+08	1.65235e+08	1.78405e+08	1.89607e+08	1.87851e+08	1.61855e+08	179789996	7.06946e+07	1.0908e+08	1.0254e+08	1.32481e+08	1	Oxidation [P146; K153]
High	Master Protein	E9QB02	Methionine--tRNA ligase, cytoplasmic [OS=Mus musculus]	0	223.527	28	22	377	22	910	102.3	6.92	2958	429.59	22	22	Pf00043, Pf00133, Pf00458, Pf09334, Pf13410, Pf14497	216443	ENSMUSG00000040354.14	Mars	2.09442e+07	2.78129e+07	2.37547e+07	2.27214e+07	2.38999e+07	2.47686e+07	1.83802e+07	2.69605e+07	1.01633e+07	1.38923e+07	1.29252e+07	1.74678e+07	1
High	Master Protein	E9QJT5	acylphosphatase [OS=Mus musculus]	0	9.851	13	2	17	2	157	17.3	9.13	107	9.59	2	2	Pf00708		ENSMUSG00000008822.15		965361	1.37978e+06	894584	968703	1.47933e+06	1.66059e+06	847181	1.33749e+06	382742	592282	800026	1.17112e+06	1
High	Master Protein	E9QK48	echinoderm microtubule-associated protein-like 2 [OS=Mus musculus]	0	30.869	7	4	32	4	841	90.7	6.98	163	39.41	4	4	Pf00400, Pf03451	72205	ENSMUSG00000040811.15	Eml2	2.89518e+06	3.23508e+06	2.37428e+06	2.51097e+06	3.05589e+06	2.16987e+06	2.54075e+06	3.13593e+06	1.01582e+06	1535252	1.65264e+06	1.53028e+06	1
High	Master Protein	E9QKR0	Guanine nucleotide-binding protein G(I)/G(S)/G(T) subunit beta-2 [OS=Mus musculus]	0	247.879	49	12	560	7	382	41.4	6.6	10107	908.2	12	12	Pf00400		ENSMUSG00000029713.15		1.1955e+08	9.92125e+07	1.08667e+08	1.06371e+08	1.12294e+08	1.17457e+08	1.04914e+08	9.61717e+07	4.64925e+07	6.50371e+07	6.07289e+07	8.28354e+07	1
High	Master Protein	E9QKV6	Unconventional myosin-IXb [OS=Mus musculus]	0	6.516	2	2	14	2	1961	222.3	8.4	37	3.9	2	2	Pf00063, Pf00130, Pf00612, Pf00620, Pf00788	17925	ENSMUSG00000004677.17	Myo9b	512096	609769	546567	544639	557554	524007	449405	591080	233846	333002	301528	369552	1
High	Master Protein	E9QKY4	FYVE, RhoGEF and PH domain-containing protein 5 [OS=Mus musculus]	0	13.183	2	2	25	2	1514	166.8	4.91	28	2.43	2	1	Pf00169, Pf00621, Pf01363	232237	ENSMUSG00000034037.14	Fgd5	4.95017e+06	5.52402e+06	4.52807e+06	5.76575e+06	5.59248e+06	4.84259e+06	4.34417e+06	5.35471e+06	1.93731e+06	3.52528e+06	3.02444e+06	3.41519e+06	1
High	Master Protein	E9QKZ2	Importin-9 [OS=Mus musculus]	0	172.816	19	19	268	19	1040	115.9	4.82	2252	273.22	19	19	Pf03810	226432	ENSMUSG00000041879.13	Ipo9	3.8195e+07	4.15284e+07	3.7764e+07	3.5101e+07	4.36672e+07	3.36005e+07	3.35192e+07	4.02556e+07	1.61571e+07	2.14614e+07	2.36154e+07	2.36965e+07	1
Medium	Master Protein	E9QL22	Putative deoxyribonuclease TATDN3 [OS=Mus musculus]	0.028	1.339	3	1	24	1	294	32.4	7.46	0	6.63	1	1	Pf01026	68972	ENSMUSG00000026632.17	Tatdn3	5.13764e+06	2.41426e+06	3.09942e+06	3.08248e+06	2.91879e+06	2.16072e+06	4.50869e+06	2.34027e+06	1.32607e+06	1.88469e+06	1.5785e+06	1.52383e+06	1
High	Master Protein	E9QLB2	Lysophospholipase-like protein 1 [OS=Mus musculus]	0	25.505	16	3	43	3	239	26.3	7.88	408	49.26	3	3	Pf02230, Pf07859, Pf12695, Pf12697	226791	ENSMUSG00000039246.8	Lyplal1	2.11933e+06	2.44137e+06	2.1338e+06	2.13451e+06	2.25231e+06	3.61746e+06	1.85988e+06	2.36654e+06	912934	1.30508e+06	1.21806e+06	2.55118e+06	1
High	Master Protein	E9QM38	Solute carrier family 12 member 2 [OS=Mus musculus]	0	65.646	7	6	50	5	1206	130.6	6.52	393	58.36	6	5	Pf00324, Pf08403, Pf13520	20496	ENSMUSG00000024597.10	Slc12a2	1.38204e+06	1.40341e+06	1.67499e+06	1.44993e+06	1.2531e+06	1.15701e+06	1.21285e+06	1360393	716635	886513	677682	815974	1
High	Master Protein	E9QM90	RIKEN cDNA 2310035C23 gene [OS=Mus musculus]	0	10.755	1	1	2	1	1216	134.5	5.34	23	2.36	1	1		227446	ENSMUSG00000026319.13	2310035C23Rik	240343	306134	244675	274889	297237	215027	210920	296751	104683	168072	160747	151646	1
High	Master Protein	E9QMA2	Protein Fam172a [OS=Mus musculus]	0	19.745	13	4	34	4	371	42.9	6.43	17	4	4	4	Pf09757	68675	ENSMUSG00000064138.13	Fam172a	207657	473079	380562	518879	479778	519027	182235	458580	162821	317252	259466	366039	1
High	Master Protein	E9QMC1	cingulin [OS=Mus musculus]	0	11.837	2	2	5	2	1192	136.5	5.91	29	2.39	2	2	Pf01576, Pf03962, Pf04111, Pf05557, Pf05667, Pf06160, Pf08317, Pf12128, Pf13166, Pf14817	70737	ENSMUSG00000068876.14	Cgn	579412	699318	233041	858832	845672	416747	508480	677884	99705.4	525105	457343	293907	1
Medium	Master Protein	E9QME3	Kinetochore-associated protein NSL1 homolog [OS=Mus musculus]	0.032	1.211	3	1	12	1	281	31.7	6.14	0	0	1	1	Pf08641	381318	ENSMUSG00000062510.12	Nsl1	830685	1.10313e+06	2.47593e+06	1.5089e+06	1.68739e+06	1.00813e+06	728992	1.06932e+06	1.05931e+06	922566	912549	710974	1
High	Master Protein	E9QMN5	Transcriptional repressor p66 alpha [OS=Mus musculus]	0	18.614	7	3	28	3	630	67.4	9.89	163	23.73	3	3		234366	ENSMUSG00000036180.15	Gatad2a	1.05848e+06	836582	1.20298e+06	1.22285e+06	1.01095e+06	965535	928899	810941	514687	747670	546729	680935	1
High	Master Protein	E9QN31	Probable 28S rRNA (cytosine-C(5))-methyltransferase [OS=Mus musculus]	0	149.825	21	14	197	14	794	86.9	9.19	2893	254.86	14	14	Pf01189, Pf12847	110109	ENSMUSG00000038279.10	Nop2	1.85814e+07	1.46276e+07	2.26077e+07	2.06415e+07	1.96033e+07	1.91775e+07	1.63067e+07	1.41793e+07	9.67256e+06	1.26206e+07	1.06016e+07	1.35247e+07	1
High	Master Protein	E9QNN1	Atp-dependent rna helicase a [OS=Mus musculus]	0	1271.87	55	65	3971	1	1384	149.6	6.83	58051	6309.36	65	65	Pf00035, Pf00270, Pf00271, Pf04408, Pf07717	13211	ENSMUSG00000042699.11	Dhx9	3.83865e+06	3.31127e+06	3.40324e+06	3.5572e+06	2.76693e+06	2.89035e+06	3.36872e+06	3.20978e+06	1.45606e+06	2.17493e+06	1.49637e+06	2.0384e+06	1	Oxidation [P81; P87; P109; P794; K1040]
High	Master Protein	E9QNX9	Tyrosine-protein kinase receptor [OS=Mus musculus]	0	8.054	1	2	14	2	1369	155.2	5.83	28	5.44	2	2	Pf00041, Pf00069, Pf00757, Pf01030, Pf01826, Pf07714, Pf14843	16001	ENSMUSG00000005533.10	Igf1r	779412	801726	1.00493e+06	773272	781390	734866	683996	777154	429955	472792	422579	518258	1
High	Master Protein	E9QP00	Transformer-2 protein homolog alpha [OS=Mus musculus]	0	57.008	25	7	257	6	282	32.6	11.27	3473	295.23	7	7	Pf00076, Pf13893, Pf14259	101214	ENSMUSG00000029817.11	Tra2a	1.94511e+07	1.52322e+07	2.67842e+07	2.05661e+07	2.05031e+07	2.64929e+07	1.70699e+07	1.47653e+07	1.14595e+07	12574505	1.10882e+07	1.86839e+07	1
High	Master Protein	E9QP19	E3 ubiquitin-protein ligase TRIM33 [OS=Mus musculus]	0	35.035	3	3	44	2	1140	123.6	6.74	668	49.11	2	3	Pf00439, Pf00628, Pf00643, Pf13639	94093	ENSMUSG00000033014.12	Trim33	1.31586e+06	947972	1.47168e+06	1.06774e+06	993439	1.0131e+06	1.15477e+06	918917	629650	652836	537256	714481	1
High	Master Protein	E9QP62	LIM and senescent cell antigen-like-containing domain protein [OS=Mus musculus]	0	87.552	31	10	117	10	387	44.3	7.88	934	119.33	10	9	Pf00412	110829	ENSMUSG00000019920.17	Lims1	8.62e+06	9.26282e+06	7.45778e+06	9.27621e+06	9.1359e+06	9.81205e+06	7.56473e+06	8.97892e+06	3.19077e+06	5.67164e+06	4.94073e+06	6.91986e+06	1
High	Master Protein	E9QPI5	Sister chromatid cohesion protein PDS5 homolog A [OS=Mus musculus]	0	113.291	13	14	135	10	1332	150.1	7.85	1699	146.7	12	13		71521	ENSMUSG00000029202.12	Pds5a	6.10826e+06	7.72308e+06	7.39349e+06	7.21544e+06	6.26817e+06	6.20107e+06	5360482	7.48637e+06	3.16326e+06	4.41165e+06	3.38985e+06	4.37325e+06	1
High	Master Protein	E9QPX1	Collagen alpha-1(XVIII) chain [OS=Mus musculus]	0	107.915	8	11	217	11	1774	182.2	5.71	2476	279.05	11	10	Pf01391, Pf01392, Pf06121, Pf06482, Pf13385	12822	ENSMUSG00000001435.15	Col18a1	1.71296e+07	2.25973e+07	1.4496e+07	1.85422e+07	2.50121e+07	2.5324e+07	1.50326e+07	2.19047e+07	6.20202e+06	1.1337e+07	1.35266e+07	1.78595e+07	1	Oxidation [P1418; P1419; P1421; P1422; P1424; P1425; P1427; P1433]
High	Master Protein	F6QL70	60S ribosomal protein L29 [OS=Mus musculus]	0	13.727	13	2	50	2	154	17	11.84	392	68.89	2	2	Pf01779		ENSMUSG00000091695.1		2.29391e+07	1.16611e+07	2.55895e+07	2.28051e+07	1.66976e+07	1.2709e+07	20130889	11303725	10948312	13943473	9030149	8962910	1
Medium	Master Protein	F6QZZ3	PCI domain-containing protein 2 (Fragment) OS=Mus musculus GN=Pcid2 PE=4 SV=1	0.03	1.269	74	1	1	1	23	2.5	4.74	0		1				ENSMUSG00000038542.14		591068	484472	863632	692826	601159	767404	518709	469623	369500	423606	325110	541205	1	Oxidation [K17]
High	Master Protein	F6R9G0	E1A-binding protein p400 [OS=Mus musculus]	0	6.415	4	1	6	1	325	34.6	10.81	65	5.51	1	1			ENSMUSG00000029505.17		431494	631643	779396	1.00114e+06	1.08527e+06	1.00288e+06	378670	612283	333460	612114	586921	707272	1
High	Master Protein	F6RJV6	lanC-like protein 2 [OS=Mus musculus]	0	36.281	12	4	49	4	441	49.7	7.14	304	56.71	4	4	Pf05147		ENSMUSG00000062190.12		3.92617e+06	5.09778e+06	4.11854e+06	4.67916e+06	4.52864e+06	4.62921e+06	3.44552e+06	4.94154e+06	1.76209e+06	2.86092e+06	2.44911e+06	3.26471e+06	1
High	Master Protein	F6RPJ9	insulin-degrading enzyme [OS=Mus musculus]	0	94.266	14	12	147	12	987	114.2	6.27	834	119.23	12	12	Pf00675, Pf05193		ENSMUSG00000056999.14; ENSMUSG00000111624.1		1.09874e+07	1.34131e+07	1.14725e+07	1.28314e+07	1.28347e+07	1.20711e+07	9.6423e+06	1.3002e+07	4.90845e+06	7.84538e+06	6.94104e+06	8.51304e+06	1
High	Master Protein	F6SFF5	Ubiquinone biosynthesis protein COQ9, mitochondrial [OS=Mus musculus]	0	11.699	8	1	2	1	270	30.3	5.99	44	3.25	1	1	Pf08511		ENSMUSG00000031782.15		273340	431124	242042	321243	448099	411080	239878	417910	103556	196414	242334	289911	1
High	Master Protein	F6SQH7	Polymerase delta-interacting protein 2 [OS=Mus musculus]	0	29.079	13	3	41	3	284	32.6	7.91	383	52.63	3	3	Pf04379, Pf08755		ENSMUSG00000001100.10		3.2935e+06	3.49847e+06	3.89687e+06	3.0119e+06	3.40526e+06	3.5798e+06	2890307	3.39124e+06	1.66726e+06	1.84153e+06	1.84158e+06	2.52462e+06	1
High	Master Protein	F6SVV1	40S ribosomal protein S7 [OS=Mus musculus]	0	198.919	57	11	412	11	192	21.9	10.02	4464	730.17	11	11	Pf01251		ENSMUSG00000044424.3		1.24884e+08	9.64011e+07	1.43096e+08	1.3008e+08	8.78776e+07	9.67982e+07	1.09596e+08	9.34465e+07	6.12228e+07	7.9533e+07	4.75246e+07	6.82661e+07	1
High	Master Protein	F6T4M4	Serine/arginine repetitive matrix protein 1 [OS=Mus musculus]	0	28.114	15	2	111	1	140	16.2	5.38	196	63.92	2	2	Pf01480		ENSMUSG00000028809.16		1.07713e+08	7.76606e+07	1.25012e+08	9.85145e+07	1.05178e+08	8.23061e+07	94526664	75280360	53485668	60233512	56880520	58045664	1
High	Master Protein	F6T4V9	E3 ubiquitin-protein ligase MYCBP2 [OS=Mus musculus]	0	3.611	2	2	4	2	1463	162.7	6.86	0	0	2	2	Pf13639		ENSMUSG00000033004.14		413581	395252	389722	388399	423364	354073	362951	383138	166740	237474	228957	249707	1
High	Master Protein	F6TFN2	LIM domain only 7 [OS=Mus musculus]	0	54.292	9	6	37	6	1189	133.9	5.99	323	36.44	6	6	Pf00412, Pf00595, Pf13180		ENSMUSG00000033060.15		1.11244e+06	1.10235e+06	1.32322e+06	1.26921e+06	1.10371e+06	1.54616e+06	976256	1.06857e+06	566133	776020	596890	1.09042e+06	1
High	Master Protein	F6TLV3	Fibronectin type-III domain-containing protein 3a [OS=Mus musculus]	0	13.092	4	2	6	2	1154	127.2	7.15	0	5.16	1	2	Pf00041		ENSMUSG00000033487.14		285611	322561	220419	217627	334828	429331	250647	312674	94305.1	133061	181076	302782	1
High	Master Protein	F6UIS1	Endoplasmic reticulum-Golgi intermediate compartment protein 3 [OS=Mus musculus]	0	26.076	13	3	24	3	246	28	5.86	112	21.34	3	3	Pf07970, Pf13850		ENSMUSG00000005881.13		3.37499e+06	3.40454e+06	2.93173e+06	3.30126e+06	3.44542e+06	3.25312e+06	2.96182e+06	3.30019e+06	1.25433e+06	2.01845e+06	1.8633e+06	2.29423e+06	1
High	Master Protein	F6UK66	Coiled-coil domain-containing protein 50 [OS=Mus musculus]	0	3.685	5	1	4	1	256	29.8	6.67	13	0	1	1	Pf15295		ENSMUSG00000038127.14		212324	206654	224334	248557		209123	186332	200320	95980.1	151972		147482	1
High	Master Protein	F6V6B6	Protein BANP [OS=Mus musculus]	0	4.881	4	1	11	1	321	34.9	5.83	48	4.32	1	1	Pf10523		ENSMUSG00000025316.16		259516	183437	231733	230652	211630	318929	227746	177815	99145.7	141025	114450	224922	1
High	Master Protein	F6V6T4	Transmembrane emp24 domain-containing protein 2 [OS=Mus musculus]	0	52.193	19	3	106	3	176	20	9.07	1392	93.26	3	3	Pf01105		ENSMUSG00000029390.13		8.20739e+06	9.0129e+06	7.51184e+06	8.40724e+06	9.57336e+06	1.04484e+07	7.20263e+06	8.73666e+06	3.2139e+06	5.14034e+06	5.17732e+06	7.36863e+06	1
High	Master Protein	F6VQ81	Tumor protein D54 [OS=Mus musculus]	0	8.549	12	2	10	2	161	17.7	8.19	53	7.28	2	1	Pf04201		ENSMUSG00000000827.18		762731	1.15347e+06	4.50998e+06	794422	1.45112e+06	1.21299e+06	669357	1.11812e+06	1.92957e+06	485724	784772	855449	1	Oxidation [P7]
High	Master Protein	F6VQH5	Heterogeneous nuclear ribonucleoprotein D-like [OS=Mus musculus]	0	178.613	31	10	465	7	323	35.6	7.8	6434	556.82	10	10	Pf00076, Pf13893, Pf14259		ENSMUSG00000029328.15		3.53485e+07	2.97139e+07	3.41061e+07	4.14366e+07	3.09433e+07	3.46662e+07	3.10211e+07	2.88032e+07	1.45921e+07	2.53351e+07	1.67343e+07	2.44481e+07	1	Oxidation [K209]
High	Master Protein	F6W761	integrator complex subunit 13 [OS=Mus musculus]	0.001	3.265	7	2	4	2	395	44.3	6.52	0	0	2	2	Pf10221		ENSMUSG00000040250.14		366330	376544	159000	532715	329467	240591	321484	365003	68027.2	325711	178177	169675	1
High	Master Protein	F6WF94	ribonuclease h2 subunit b [OS=Mus musculus]	0.003	2.78	16	1	2	1	44	4.9	10.37	33	1.68	1	1			ENSMUSG00000021932.13		313117	343943	366758	264811	269178	289864	274785	333401	156915	161910	145573	204424	1
High	Master Protein	F6Y616	Polyadenylate-binding protein-interacting protein 1 [OS=Mus musculus]	0	68.054	16	7	122	7	484	53.9	4.78	1283	140.42	7	7	Pf02854, Pf07145	218693	ENSMUSG00000025451.15	Paip1	5.6242e+06	5.7765e+06	5.92013e+06	7.08043e+06	6.96508e+06	6.4697e+06	4.93568e+06	5.59945e+06	2.53289e+06	4.3291e+06	3.76675e+06	4.5627e+06	1
High	Master Protein	F6YBB8	RNA-binding protein NOB1 [OS=Mus musculus]	0	3.678	15	1	20	1	62	7.1	9.41	78	15.73	1	1			ENSMUSG00000003848.14		450913	633368	587355	548791	582642	604894	395712	613956	251297	335540	315096	426596	1
Medium	Master Protein	F6YKG7	Gamma-sarcoglycan [OS=Mus musculus]	0.04	1.004	15	1	11	1	92	9.8	5.76	0		1		Pf04790		ENSMUSG00000035296.13		571102	576845	616585	1.05074e+06	1.09727e+06	984862	501188	559165	263802	642440	593408	694565	1	Oxidation [P32]
High	Master Protein	F6YTG0	Enoyl-CoA hydratase domain-containing protein 2, mitochondrial [OS=Mus musculus]	0	19.759	11	1	18	1	185	20.2	7.25	412	32.75	1	1	Pf00378		ENSMUSG00000028601.18		262798	376942	861410	688235	938433	435023	230626	365389	368549	420799	507509	306796	1
High	Master Protein	F6YUI5	H/ACA ribonucleoprotein complex subunit 4 [OS=Mus musculus]	0	77.17	51	7	128	1	184	20.8	8.62	1402	285.78	6	7	Pf01509, Pf08068		ENSMUSG00000031403.14		2.60951e+06	2.78533e+06	3.40663e+06	3.47529e+06	2.84322e+06	3.62849e+06	2.29005e+06	2.69996e+06	1.4575e+06	2.12485e+06	1.53762e+06	2.55896e+06	1	Acetyl [N-Term]
High	Master Protein	F6YX19	Phosphatidylinositol-glycan biosynthesis class X protein [OS=Mus musculus]	0	7.323	5	1	7	1	252	28.4	6.4	15	3.73	1	1	Pf08320		ENSMUSG00000023791.15		133666	164194	174708	217861	182153	179900	117302	159162	74748	133204	98508.9	126873	1
High	Master Protein	F6ZAX1	Polyadenylate-binding protein 1 [OS=Mus musculus]	0	185.883	81	8	174	4	118	12.7	6.02	2534	229.77	8	4	Pf00658		ENSMUSG00000022283.14		1.70065e+06	461332	3.36931e+06	940313	1.64129e+06	1.09011e+06	1.49246e+06	447193	1.44154e+06	574924	887615	768792	1	Oxidation [P2; P10; P17; P26]
High	Master Protein	F6ZBR8	Protein Wiz [OS=Mus musculus]	0	20.428	4	3	24	3	973	104.5	9.41	124	19.68	3	3			ENSMUSG00000024050.15		984330	793022	1.27297e+06	1.18249e+06	989651	907754	863827	768717	544633	722998	535208	640186	1
High	Master Protein	F6ZDS4	Nucleoprotein TPR [OS=Mus musculus]	0	588.558	23	46	832	46	2431	273.8	5.03	9135	1074.37	46	46	Pf00038, Pf01496, Pf01576, Pf02463, Pf04111, Pf04156, Pf07926, Pf08317, Pf09726, Pf12128, Pf13166, Pf14915, Pf15070	108989	ENSMUSG00000006005.17	Tpr	5.95725e+07	5.77438e+07	6.7684e+07	6.89871e+07	7.10919e+07	5.22958e+07	5.22796e+07	5.5974e+07	2.89582e+07	4.218e+07	3.84468e+07	3.68811e+07	1
High	Master Protein	F6ZFU0	Elongation factor 1-delta [OS=Mus musculus]	0	159.462	20	7	240	1	552	61.4	7.39	4927	396.57	7	7	Pf00736		ENSMUSG00000055762.15		1.56116e+06	1.7191e+06	1.68762e+06	1.75466e+06	1.59726e+06	1.35391e+06	1.37004e+06	1.66641e+06	722038	1.07283e+06	863803	954836	1
Medium	Master Protein	F7AX23	Syntaxin-binding protein 4 [OS=Mus musculus]	0.029	1.298	8	1	1	1	154	17.4	5.26	0		1		Pf00397		ENSMUSG00000020546.14		259539	219909	443472	347960	258359	172678	227766	213169	189737	212749	139722	121779	1
High	Master Protein	F7B6K4	pantothenate kinase 4 [OS=Mus musculus]	0	5.643	4	1	1	1	473	53.2	6.4		2.54		1	Pf01937, Pf03630		ENSMUSG00000029056.13		209381	400035	162340	181638	207304	268223	183749	387775	69456.4	111057	112111	189162	1
High	Master Protein	F7BCN0	predicted gene, 28048 [OS=Mus musculus]	0.006	2.365	14	1	2	1	99	11.1	9.99	0	0	1	1	Pf07258		ENSMUSG00000098650.1			363375	251414		284372	334340		352237	107566		153790	235790	1
Medium	Master Protein	F7BGN3	Methylenetetrahydrofolate reductase [OS=Mus musculus]	0.014	1.822	5	1	12	1	152	18	4.55	19		1				ENSMUSG00000029009.17		2.37042e+06	3.08574e+06	2.14437e+06	1.92073e+06	2.03141e+06	1.30473e+06	2.08023e+06	2.99117e+06	917455	1.17437e+06	1.0986e+06	920150	1
High	Master Protein	F7C0H6	CB1 cannabinoid receptor-interacting protein 1 [OS=Mus musculus]	0	4.313	6	1	2	1	184	20.7	9.36	0	0	1	1	Pf15043	380686	ENSMUSG00000044629.5	Cnrip1	415061	524005	401157	511686	620927	791384	364249	507945	171632	312854	335800	558117	1
High	Master Protein	F7CXI4	Cytosolic endo-beta-N-acetylglucosaminidase [OS=Mus musculus]	0	7.41	3	1	6	1	373	41.4	7.77	25	6.06	1	1	Pf03644		ENSMUSG00000033857.12		259686	293440	287415	312947	330947	320724	227895	284446	122969	191341	178978	226188	1
High	Master Protein	F7D1J2	Receptor-interacting serine/threonine-protein kinase 1 [OS=Mus musculus]	0.001	3.39	2	1	6	1	597	68.1	6.49	31	0	1	1	Pf00069, Pf00531, Pf07714, Pf12721		ENSMUSG00000021408.14		256639	320657	262531	299065	227277	297322	225221	310829	112322	182854	122912	209684	1
High	Master Protein	F8VPM7	ELKS/Rab6-interacting/CAST family member 1 [OS=Mus musculus]	0	20.888	2	2	14	2	1120	128.3	5.91	163	14.96	2	2	Pf04156, Pf05529, Pf05557, Pf05622, Pf09457, Pf09726, Pf10174, Pf12128, Pf13166	111173	ENSMUSG00000030172.15	Erc1	331420	223037	276861		258194		290847	216201	118453		139632		1
High	Master Protein	F8VPN4	amylo-1,6-glucosidase, 4-alpha-glucanotransferase [OS=Mus musculus]	0	73.268	9	10	79	10	1532	174.2	6.74	619	72.76	10	10	Pf00128, Pf06202, Pf14699, Pf14701, Pf14702	77559	ENSMUSG00000033400.14	Agl	3.98806e+06	5.42517e+06	3.7602e+06	4.5975e+06	4.70279e+06	4.75601e+06	3.49983e+06	5.2589e+06	1.60878e+06	2.81099e+06	2.54329e+06	3.35414e+06	1
High	Master Protein	F8VPP8	Zinc finger CCCH type-containing 7B [OS=Mus musculus]	0	8.133	2	2	6	2	982	110.2	7.42	46	2.36	2	2	Pf00515, Pf00642, Pf12171, Pf12895, Pf12968, Pf13414, Pf13424	20286	ENSMUSG00000022390.10	Zc3h7b	984499	336165	1.16892e+06	1.16876e+06	1.03808e+06	1.10171e+06	863976	325862	500117	714599	561398	776968	1
High	Master Protein	F8VPQ2	AT-rich interactive domain 4A (RBP1-like) [OS=Mus musculus]	0	5.275	1	1	4	1	1261	142	5.07	18	1.72	1	1	Pf00855, Pf01388, Pf08169, Pf11717	238247	ENSMUSG00000048118.17	Arid4a	162589	224447	123320	207977	193002	193444	142685	217568	52761.8	127161	104376	136425	1
High	Master Protein	F8VPR2	Formin-like protein 2 [OS=Mus musculus]	0	3.78	1	2	12	2	1083	122.8	7.4	27	7.19	2	2	Pf02181, Pf04111, Pf06160, Pf06367, Pf06371	71409	ENSMUSG00000036053.16	Fmnl2	1.2272e+06	538972	566580	364307	332922	1.17245e+06	1.07696e+06	522453	242408	222744	180045	826858	1
High	Master Protein	F8VPU2	FERM, RhoGEF and pleckstrin domain-containing protein 1 [OS=Mus musculus]	0	88.613	14	11	170	11	1048	118.8	7.88	1724	178.34	11	11	Pf00169, Pf00373, Pf00621, Pf08736, Pf09379, Pf09380	223254	ENSMUSG00000025555.14	Farp1	1.30625e+07	1.40898e+07	1.31842e+07	1.25787e+07	1.3237e+07	1.31684e+07	1.14634e+07	1.3658e+07	5.64078e+06	7.69086e+06	7.15861e+06	9286910	1
High	Master Protein	F8VPY2	Transcription initiation factor TFIID subunit 5 [OS=Mus musculus]	0	5.938	2	1	8	1	801	86.9	5.64	110	5.67	1	1	Pf00400, Pf04494, Pf08662	226182	ENSMUSG00000025049.5	Taf5	105120	109307	200722	146849	141511	103748	92251.2	105957	85877.8	89785.9	76530	73167.5	1
High	Master Protein	F8VQ40	Laminin subunit alpha-1 [OS=Mus musculus]	0	279.501	11	25	419	25	3083	337.9	6.71	4259	498.2	25	24	Pf00038, Pf00052, Pf00053, Pf00054, Pf00055, Pf01576, Pf02210, Pf03302, Pf04156, Pf05557, Pf05701, Pf06008, Pf06009, Pf06160, Pf10174, Pf12128, Pf13385	16772	ENSMUSG00000032796.7	Lama1	3.05686e+07	3.68359e+07	3.30133e+07	3.80932e+07	3.54435e+07	3.4875e+07	2.68264e+07	3.57069e+07	1.41245e+07	2.32909e+07	1.9168e+07	2.45953e+07	1
High	Master Protein	F8VQ54	endoribonuclease Dicer [OS=Mus musculus]	0	9.952	1	1	2	1	1906	215.6	5.8	27	2.79	1	1	Pf00270, Pf00271, Pf00636, Pf02170, Pf03368, Pf04851, Pf14622	192119	ENSMUSG00000041415.9	Dicer1	339792	343228	451970	241927	255810	284945	298195	332708	193373	147919	138343	200955	1
High	Master Protein	F8VQ87	5'-3' exoribonuclease 1 [OS=Mus musculus]	0	24.889	3	5	31	5	1723	194.6	7.62	54	15.43	4	5	Pf03159	24127	ENSMUSG00000032410.13	Xrn1	1.40167e+06	1.52098e+06	752071	1.07649e+06	926551	1.67631e+06	1.23007e+06	1.47436e+06	321769	658185	501083	1.1822e+06	1
High	Master Protein	F8VQB6	Unconventional myosin-X [OS=Mus musculus]	0	5.487	1	1	6	1	2062	237.2	6.25	21	1.88	1	1	Pf00063, Pf00169, Pf00373, Pf00769, Pf00784, Pf00887, Pf12325, Pf15409	17909	ENSMUSG00000022272.17	Myo10	304457	555194	420780	450935	446191	616540	267185	538178	180028	275710	241302	434810	1
High	Master Protein	F8VQC1	Signal recognition particle subunit SRP72 [OS=Mus musculus]	0	129.845	22	12	200	12	671	74.6	9.23	2780	258.46	12	12	Pf08492, Pf12895, Pf13424, Pf14559	66661	ENSMUSG00000036323.14	Srp72	1.21658e+07	1.79537e+07	1.43779e+07	1.70726e+07	1.86567e+07	1.79259e+07	1.06764e+07	1.74035e+07	6.15149e+06	1.04385e+07	1.00896e+07	1.26421e+07	1
High	Master Protein	F8VQC7	Kinectin [OS=Mus musculus]	0	235.78	24	21	221	21	1327	152.4	5.9	2434	273.4	20	20	Pf04156, Pf05557, Pf12128	16709	ENSMUSG00000021843.16	Ktn1	1.81222e+07	1.57677e+07	1.62078e+07	1.69674e+07	1.84687e+07	1.4585e+07	1.59036e+07	1.52844e+07	6.9344e+06	1.03742e+07	9.98794e+06	1.0286e+07	1
High	Master Protein	F8VQJ3	Laminin subunit gamma-1 [OS=Mus musculus]	0	418.689	29	37	748	3	1607	177.1	5.19	10435	937.81	37	37	Pf00052, Pf00053, Pf00055, Pf00261, Pf01576, Pf04012, Pf05262, Pf05483, Pf05557, Pf05701, Pf06008, Pf06160, Pf08317, Pf10174, Pf12795, Pf13514, Pf13868, Pf13949	226519	ENSMUSG00000026478.14	Lamc1	6.02652e+07	6.16218e+07	5.94051e+07	6.29812e+07	6.4758e+07	6.23809e+07	5.28875e+07	5.97331e+07	2.54161e+07	3.85078e+07	3.50214e+07	4.39936e+07	1
High	Master Protein	F8WGT2	Transmembrane protein 209 [OS=Mus musculus]	0	31.299	9	4	38	4	519	58.2	8.75	192	24.62	4	4	Pf09786		ENSMUSG00000029782.18		1.75513e+06	2.09931e+06	2.02592e+06	2.63709e+06	2.49674e+06	2.11262e+06	1.54026e+06	2.03497e+06	866780	1.61237e+06	1.35025e+06	1.48991e+06	1
High	Master Protein	F8WH20	Oxysterol-binding protein [OS=Mus musculus]	0	15.221	4	2	18	2	819	93	6.54	67	20.1	2	2	Pf00169, Pf01237, Pf15409, Pf15413	71720	ENSMUSG00000029822.15	Osbpl3	411015	713527	421718	109451	556411	727469	360698	691658	180430	66920.1	300909	513041	1
High	Master Protein	F8WHP8	ATP synthase subunit f, mitochondrial [OS=Mus musculus]	0	15.648	30	2	46	2	76	9	9.88	398	51.75	2	2	Pf10206		ENSMUSG00000038690.15		2.74894e+07	3.17089e+07	3.36551e+07	3.60409e+07	3.93943e+07	4.87641e+07	2.41241e+07	3.0737e+07	1.43991e+07	22036060	2.13046e+07	34390440	1	Oxidation [P9]
High	Master Protein	F8WHU5	Sister chromatid cohesion protein PDS5 homolog B [OS=Mus musculus]	0	231.309	19	24	312	20	1449	164.7	8.54	3217	380.96	22	23		100710	ENSMUSG00000034021.15	Pds5b	2.92004e+07	2.70136e+07	2.63592e+07	2.82213e+07	2.44297e+07	2.3695e+07	2.56257e+07	2.61856e+07	1.12776e+07	1.7255e+07	1.32117e+07	1.67107e+07	1
High	Master Protein	F8WHU7	Cohesin subunit SA-1 [OS=Mus musculus]	0	42.66	6	6	65	4	1221	140	5.45	264	66.99	6	6	Pf08514	20842	ENSMUSG00000037286.15	Stag1	2.03646e+06	2.03228e+06	2.09226e+06	2.07088e+06	2.23856e+06	2.07909e+06	1.78716e+06	1.96999e+06	895160	1.26617e+06	1.21062e+06	1.46626e+06	1
High	Master Protein	F8WHV1	Mitotic spindle-associated MMXD complex subunit MIP18 [OS=Mus musculus]	0.009	2.024	5	1	2	1	136	15	5.45	14	0	1	1			ENSMUSG00000031879.14		159738	256105	212698	255098	238445	212208	140183	248256	91001.7	155971	128952	149658	1
High	Master Protein	F8WI14	Extracellular matrix protein 1 [OS=Mus musculus]	0.004	2.605	4	1	1	1	558	62.7	6.89	0		1		Pf05782	13601	ENSMUSG00000028108.15	Ecm1	163623	158221	103816	147531		91376.7	143593	153372	44417.1	90203.4		64442.6	1
Medium	Master Protein	F8WI88	PEST proteolytic signal-containing nuclear protein [OS=Mus musculus]	0.042	0.942	4	1	10	1	189	20.2	6.35	0	0	1	1	Pf15473		ENSMUSG00000071533.11		812891	1.60199e+06	1.80112e+06	732025	654297	505863	713377	1.55289e+06	770600	447573	353847	356755	1
High	Master Protein	F8WI90	Tyrosine-protein kinase [OS=Mus musculus]	0	72.47	20	9	129	5	535	59.9	7.42	1114	127.02	8	9	Pf00017, Pf00018, Pf00069, Pf07653, Pf07714, Pf14604	20779	ENSMUSG00000027646.15	Src	7.51484e+06	8.60876e+06	7.64315e+06	7.93461e+06	7.35131e+06	8.63939e+06	6.59487e+06	8.34491e+06	3.27008e+06	4.85136e+06	3.97562e+06	6.09285e+06	1
High	Master Protein	F8WJ93	Echinoderm microtubule-associated protein-like 4 [OS=Mus musculus]	0	120.817	19	15	154	14	988	109.9	6.49	1015	134.65	15	15	Pf00400, Pf03451	78798	ENSMUSG00000032624.15	Eml4	9.38845e+06	1.15561e+07	8.07456e+06	1.0443e+07	1.20863e+07	8.91257e+06	8.23911e+06	1.12019e+07	3.45465e+06	6.38502e+06	6.53633e+06	6.28551e+06	1
High	Master Protein	F8WJA5	RNA-binding protein Musashi homolog 1 [OS=Mus musculus]	0	19.64	7	2	18	1	325	35.3	8.7	110	13.86	2	2	Pf00076, Pf13893, Pf14259		ENSMUSG00000054256.11		531477	680276	716773	917856	679174	696491	466413	659426	306667	561194	367300	491194	1
High	Master Protein	F8WJG3	transformer-2 protein homolog beta [OS=Mus musculus]	0	151.721	53	10	586	9	188	21.9	10.15	6996	764.38	10	10	Pf00076, Pf08777, Pf13893, Pf14259	20462	ENSMUSG00000022858.15	Tra2b	1.13487e+08	9.33189e+07	1.3994e+08	1.29095e+08	1.24864e+08	1.37928e+08	9.95935e+07	9.04587e+07	5.98724e+07	7.89312e+07	6.75271e+07	9.72723e+07	1
High	Master Protein	F8WJK8	Hsc70-interacting protein [OS=Mus musculus]	0	158.019	31	11	318	11	362	40.5	5.3	3315	390.78	11	11	Pf00515, Pf13371, Pf13414, Pf13424, Pf13431, Pf13432		ENSMUSG00000022403.14		4.35455e+07	4.50007e+07	4.45591e+07	4.45916e+07	3.79516e+07	3.76811e+07	3.82147e+07	4.36215e+07	1.90643e+07	2.72641e+07	2.05244e+07	2.65743e+07	1
High	Master Protein	G3CE24	vitamin K epoxide reductase complex subunit 1 [OS=Mus musculus domesticus]	0	15.2	23	1	32	1	57	6.1	9.28	527	47.28	1	1	Pf07884	27973		Vkorc1	1.1563e+06	1.4083e+06	1.30008e+06	1.44838e+06	1.64998e+06	2.17198e+06	1.01474e+06	1.36514e+06	556230	885567	892317	1.53177e+06	1
High	Master Protein	G3EB90	NADH-ubiquinone oxidoreductase chain 1 [OS=Mus musculus]	0	12.203	8	4	53	4	318	36.1	6.93	325	41.04	4	4	Pf00146				2.76189e+06	4.40535e+06	3.06432e+06	4.55474e+06	4.85447e+06	4.15049e+06	2.42378e+06	4.27033e+06	1.31105e+06	2.78485e+06	2.62532e+06	2.9271e+06	1
High	Master Protein	G3UVU2	splicing factor 3a subunit 2 [OS=Mus musculus]	0	130.06	22	9	243	9	485	51.2	9.64	2020	364.69	8	9	Pf12874	20222	ENSMUSG00000020211.15	Sf3a2	3.46913e+07	2.80956e+07	3.10094e+07	3.3078e+07	3.03403e+07	3.12274e+07	3.04443e+07	2.72345e+07	1.32672e+07	2.02245e+07	1.64082e+07	2.20229e+07	1	Oxidation [P217; P218]; Acetyl [N-Term]
High	Master Protein	G3UVV4	hexokinase 1, isoform CRA_f [OS=Mus musculus]	0	346.879	37	30	564	27	917	101.8	6.67	7171	728.64	30	29	Pf00349, Pf03727	15275	ENSMUSG00000037012.18	Hk1	5.43086e+07	7.21032e+07	5.96292e+07	6.38581e+07	7.03733e+07	6.26614e+07	4.76601e+07	6.98933e+07	2.5512e+07	3.9044e+07	3.80582e+07	4.41914e+07	1
High	Master Protein	G3UW85	Enhancer of rudimentary homolog [OS=Mus musculus]	0	67.522	26	3	92	3	123	14.3	5.54	1090	116.49	3	3	Pf01133	13877	ENSMUSG00000021131.14	Erh	4.1815e+06	3.75907e+06	4.14957e+06	5.43547e+06	4.49787e+06	4.27125e+06	3669596	3.64386e+06	1.77537e+06	3.32334e+06	2.43247e+06	3.01226e+06	1
High	Master Protein	G3UWE3	E3 SUMO-protein ligase PIAS2 [OS=Mus musculus]	0	15.2	2	1	14	1	614	67.5	7.9	281	17.22	1	1	Pf02891, Pf14324	17344	ENSMUSG00000025423.15	Pias2	260754	379954	299810	369368	329806	351813	228833	368309	128272	225838	178360	248113	1
High	Master Protein	G3UWS5	polyadenylate-binding protein 2 [OS=Mus musculus]	0	78.881	37	5	79	5	178	20.3	9.48	926	153.12	5	5	Pf00076, Pf13893, Pf14259	54196	ENSMUSG00000022194.15	Pabpn1	2.90085e+07	2.44639e+07	2.71092e+07	3.33738e+07	2.77859e+07	2.56772e+07	25457291	2.37141e+07	1.15985e+07	2.04053e+07	1.50267e+07	1.81086e+07	1
High	Master Protein	G3UWV3	Calumenin [OS=Mus musculus]	0	31.098	27	3	29	3	154	17.7	4.77	99	29.08	3	3	Pf13499, Pf13833		ENSMUSG00000029767.16		2.58032e+06	775729	2.31365e+06	2.8645e+06	3.10625e+06	1.24779e+06	2.26444e+06	751954	989882	1.75141e+06	1.67987e+06	879996	1
High	Master Protein	G3UWX1	Replication factor C subunit 1 [OS=Mus musculus]	0	56.269	8	7	77	7	1145	127.5	9.31	806	74.74	6	7	Pf00004, Pf00533, Pf00910, Pf03215, Pf05496, Pf08519, Pf12738, Pf13207, Pf13238		ENSMUSG00000029191.16		3.54469e+06	3.94614e+06	3.8392e+06	4.0609e+06	4.01564e+06	3.53778e+06	3.11075e+06	3.8252e+06	1.64258e+06	2.48291e+06	2.17168e+06	2.49499e+06	1
High	Master Protein	G3UX26	Voltage-dependent anion-selective channel protein 2 [OS=Mus musculus]	0	161.214	45	11	628	11	283	30.4	7.58	10422	950.66	11	11	Pf01459		ENSMUSG00000021771.13		1.43636e+08	1.87379e+08	1.01924e+08	1.70159e+08	1.54905e+08	1.62025e+08	1.26052e+08	1.81636e+08	4.36078e+07	1.04038e+08	8.37734e+07	1.14267e+08	1
High	Master Protein	G3UXA6	polypyrimidine tract-binding protein 3 [OS=Mus musculus]	0	212.459	33	12	463	9	554	59.7	8.94	7074	734.71	11	12	Pf00076, Pf13893, Pf14259	230257	ENSMUSG00000028382.15	Ptbp3; Rod1	3.52485e+07	3.40141e+07	3.68816e+07	3.99106e+07	3.53714e+07	3.94479e+07	3.09333e+07	3.29716e+07	1.57796e+07	2.44021e+07	19129027	2.78203e+07	1
High	Master Protein	G3UXL2	phosphoribosyl pyrophosphate synthetase 1-like 3 [OS=Mus musculus]	0	159.749	40	10	277	5	318	34.8	6.98	2987	398.5	9	10	Pf00156, Pf13793, Pf14572	328099	ENSMUSG00000079104.4	Prps1l3	8.02921e+06	9.63875e+06	6.27351e+06	9.20034e+06	9.94434e+06	9.51719e+06	7.04627e+06	9.34333e+06	2.68408e+06	5.62525e+06	5.37794e+06	6.71191e+06	1
High	Master Protein	G3UXP5	UDP-glucose glycoprotein glucosyltransferase 2 [OS=Mus musculus]	0	8.055	12	3	17	2	216	25.5	9.04	41	16.46	3	2	Pf01501		ENSMUSG00000042104.18		471402	733808	454016	346634	438720	598351	413692	711317	194248	211938	237262	421982	1
Medium	Master Protein	G3UYP4	Potassium voltage-gated channel subfamily KQT member 5 [OS=Mus musculus]	0.029	1.304	2	1	2	1	823	90	9.42	0		1		Pf00520, Pf03520, Pf07885, Pf08016		ENSMUSG00000028033.16		401269	648552	401150	485211	754974	775771	352145	628675	171630	296667	408293	547106	1
High	Master Protein	G3UYR9	GRB10-interacting GYF protein 2 [OS=Mus musculus]	0	10.554	2	1	6	1	877	101.3	5.12	0	0	1	1	Pf02213		ENSMUSG00000048000.15		316785	431653	424705	361152	221311	373817	278004	418423	181707	220815	119686	263631	1	Oxidation [P593; P594]
High	Master Protein	G3UYU0	Mex3 RNA-binding family member A [OS=Mus musculus]	0	32.231	8	3	18	3	520	54.2	7.27	274	21.93	3	3	Pf00013, Pf13014, Pf13639, Pf13920, Pf13923, Pf14634	72640	ENSMUSG00000074480.4	Mex3a	1.04993e+06	899515	1.4251e+06	1.48888e+06	1.25144e+06	1.28968e+06	921397	871946	609723	910329	676784	909536	1
High	Master Protein	G3UYU4	Flotillin-1 [OS=Mus musculus]	0	46.575	16	5	42	5	380	42.2	7.78	610	59.12	5	5	Pf01145		ENSMUSG00000059714.13		3.2513e+06	3.35926e+06	3.46347e+06	3.71068e+06	4.32108e+06	3.48783e+06	2.85327e+06	3.2563e+06	1.48182e+06	2.26877e+06	2.33686e+06	2.45976e+06	1
High	Master Protein	G3UYV7	40S ribosomal protein S28 [OS=Mus musculus]	0	43.198	50	4	120	4	56	6.3	9.96	1582	146.72	4	4	Pf01200		ENSMUSG00000067288.12		4.67427e+07	4.18715e+07	5.19575e+07	5.25274e+07	5.63264e+07	7.34922e+07	4.10204e+07	4.05882e+07	2.22297e+07	3.21162e+07	3.04616e+07	5.18297e+07	1
High	Master Protein	G3UZ49	Paired box protein Pax-8 [OS=Mus musculus]	0	3.805	6	1	2	1	322	35.2	8.62	0	0	1	1	Pf00292, Pf13384, Pf13551		ENSMUSG00000026976.15		196504	242267	179201	335385	328664	372514	172448	234842	76670.1	205061	177743	262712	1
High	Master Protein	G3UZD4	Molybdenum cofactor biosynthesis protein 1 [OS=Mus musculus]	0.007	2.211	5	1	18	1	165	18.3	8.97	0	5.19	1	1	Pf06463		ENSMUSG00000064120.13		8.37942e+06	1.02903e+07	7.98545e+06	7.5066e+06	9.20167e+06	7.67284e+06	7.35361e+06	9974929	3416529	4.58967e+06	4976307	5.41121e+06	1
High	Master Protein	G3UZF0	Ubiquitin carboxyl-terminal hydrolase 3 [OS=Mus musculus]	0	43.687	15	5	52	5	476	53.6	8.24	418	47.63	5	5	Pf00443, Pf02148, Pf13423		ENSMUSG00000032376.12		1.59962e+06	2.08421e+06	1.81099e+06	2.22755e+06	1.78902e+06	1.84832e+06	1.40379e+06	2.02033e+06	774820	1.36197e+06	967512	1.30351e+06	1
High	Master Protein	G3UZI2	Heterogeneous nuclear ribonucleoprotein Q [OS=Mus musculus]	0	408.539	54	26	1235	1	527	58.7	7.56	14454	1740.44	26	26	Pf00076, Pf13893, Pf14259		ENSMUSG00000032423.12		4.71536e+06	4.57149e+06	4.19026e+06	4.8026e+06	4.06259e+06	4.67853e+06	4.13811e+06	4.43138e+06	1792778	2.93639e+06	2.19707e+06	3299494	1	Oxidation [K359]
High	Master Protein	G3UZJ3	Dystrobrevin beta [OS=Mus musculus]	0	4.426	3	2	15	2	559	63.4	8.38	0	7.69	2	2	Pf00569, Pf02403, Pf03962, Pf04111, Pf05400, Pf09068, Pf09069, Pf11932, Pf12128, Pf13874		ENSMUSG00000071454.13		212965	263531	231230	214846	261773	183881	186894	255454	98930.4	131361	141568	129680	1
High	Master Protein	G3UZM9	Serine/threonine-protein kinase N2 [OS=Mus musculus]	0	47.796	12	8	78	7	967	109.8	6.25	689	68.07	8	7	Pf00069, Pf00433, Pf02185, Pf07714, Pf14531		ENSMUSG00000004591.16		1.65245e+07	2.09976e+07	2.54875e+07	1.60724e+07	1.44588e+07	1.25788e+07	1.45015e+07	2.03541e+07	1.09047e+07	9.82696e+06	7.81938e+06	8.87112e+06	1
High	Master Protein	G3V018	Heterogeneous nuclear ribonucleoprotein Q [OS=Mus musculus]	0	421.066	54	27	1229	2	588	65.7	8.6	14502	1729.75	27	27	Pf00076, Pf13893, Pf14259		ENSMUSG00000032423.12		2.58926e+08	2.64035e+08	2.69777e+08	2.84641e+08	2.5075e+08	2.64591e+08	2.27228e+08	2.55942e+08	1.15423e+08	1.74034e+08	1.35607e+08	1.866e+08	1	Oxidation [K359]
High	Master Protein	G3X8R5	Glutamine-rich protein 1 [OS=Mus musculus]	0	16.234	4	3	12	3	777	86.5	5.87	90	7.73	3	3	Pf00619, Pf12012	69232	ENSMUSG00000006673.14	Qrich1	1.27796e+06	1.07712e+06	1.32336e+06	1.53955e+06	1.66121e+06	1.82491e+06	1.12151e+06	1.04411e+06	566192	941309	898389	1.287e+06	1
High	Master Protein	G3X8S1	DnaJ (Hsp40) homolog, subfamily C, member 19, isoform CRA_c [OS=Mus musculus]	0	11.039	9	1	18	1	157	17	9.63	57	25.21	1	1	Pf00226	67713	ENSMUSG00000027679.13	Dnajc19	283505	393488	348774	407404	422841	507895	248798	381428	149221	249094	228675	358188	1
High	Master Protein	G3X8T2	RIKEN cDNA 5830416A07, isoform CRA_c [OS=Mus musculus]	0	49.682	7	4	38	4	972	108.2	8	100	30.76	4	4		76014	ENSMUSG00000017478.15	Zc3h18	2.66575e+06	1.77855e+06	1.92402e+06	2.50189e+06	2.84254e+06	1.98814e+06	2.3394e+06	1.72404e+06	823180	1.5297e+06	1.53726e+06	1.40212e+06	1
High	Master Protein	G3X8U9	Mitogen-activated protein kinase [OS=Mus musculus]	0	10.405	6	2	21	1	427	48.1	6.74	0	10.88	1	2	Pf00069, Pf01636, Pf07714, Pf14531	26419	ENSMUSG00000021936.13	Mapk8	276890	383326	269440	342729	298191	375737	242993	371577	115278	209551	161263	264985	1
High	Master Protein	G3X8Y3	N-alpha-acetyltransferase 15, NatA auxiliary subunit [OS=Mus musculus]	0	223.76	28	26	515	26	865	101	7.52	3421	491	26	26	Pf12569, Pf13414	74838	ENSMUSG00000063273.11	Naa15	4.45946e+07	4.88907e+07	5.11416e+07	4.98616e+07	4.36187e+07	4.35618e+07	3.91353e+07	4.73922e+07	2.18807e+07	3.04863e+07	2.35892e+07	3.07216e+07	1
High	Master Protein	G3X907	Odd Oz/ten-m homolog 3 (Drosophila) [OS=Mus musculus]	0	10.003	1	1	2	1	2715	302.8	6.51	53	2.21	1	1	Pf01500, Pf05593, Pf06247, Pf06484, Pf07974, Pf15636	23965	ENSMUSG00000031561.16	Tenm3	585608	916244	878154	967609	1.04028e+06	1.29639e+06	513917	888162	375713	591613	562588	914266	1
Medium	Master Protein	G3X920	Armadillo repeat containing 8, isoform CRA_b [OS=Mus musculus]	0.017	1.673	2	1	2	1	673	75.4	6.73	0	0	1	1	Pf01602	74125	ENSMUSG00000032468.11	Armc8	480060	647990	453324	528256	423144	488115	421291	628129	193952	322985	228838	344239	1
High	Master Protein	G3X922	DnaJ heat shock protein family (Hsp40) member C13 [OS=Mus musculus]	0	221.24	13	23	313	23	2243	254.3	6.77	3970	333.63	23	23	Pf00226, Pf14237	235567	ENSMUSG00000032560.14	Dnajc13	1.45823e+07	1.82626e+07	1.71926e+07	1.84153e+07	1.66399e+07	1.68223e+07	1.27971e+07	1.77028e+07	7.35577e+06	1.12595e+07	8.99891e+06	1.18638e+07	1
High	Master Protein	G3X924	Plasmalemma vesicle-associated protein [OS=Mus musculus]	0	62.527	17	6	75	5	438	49.9	8.4	1379	99.52	5	6	Pf06637	84094	ENSMUSG00000034845.6	Plvap	2.62932e+06	2.60751e+06	3.38074e+06	3.01631e+06	3.01458e+06	2.94646e+06	2.30744e+06	2.52759e+06	1.44643e+06	1.84423e+06	1.6303e+06	2.07796e+06	1
High	Master Protein	G3X925	pyruvate kinase [OS=Mus musculus]	0	51.154	13	7	148	6	574	62.2	7.09	1765	184.48	7	7	Pf00224, Pf02887	18770	ENSMUSG00000041237.12	Pklr	6.10067e+06	6.48025e+06	3.79132e+06	3.31309e+06	5.31234e+06	3.81249e+06	5.35382e+06	6.28164e+06	1.62209e+06	2.02568e+06	2.87294e+06	2.68873e+06	1
High	Master Protein	G3X926	MCG1407, isoform CRA_a [OS=Mus musculus]	0	4.507	4	1	18	1	273	31.5	9.98	24	18.86	1	1	Pf04427	67239	ENSMUSG00000038510.12	Rpf2	530406	597262	651832	790445	909525	761412	465473	578956	278882	483292	491875	536979	1
High	Master Protein	G3X956	suppressor of Ty 16 [OS=Mus musculus]	0	391.776	37	34	473	34	1047	119.8	5.66	5529	643.69	34	34	Pf00557, Pf08512, Pf08644, Pf14826	114741	ENSMUSG00000035726.7	Supt16; Supt16h	5.53e+07	2.69593e+07	7.09576e+07	4.80652e+07	3.83289e+07	4.50091e+07	4.85302e+07	2.6133e+07	3.03588e+07	2.93879e+07	2.07285e+07	3.17423e+07	1	Oxidation [K606]
High	Master Protein	G3X9B1	HEAT repeat-containing 1 [OS=Mus musculus]	0	74.882	7	14	108	14	2143	241.9	6.98	812	89.19	14	14	Pf08146, Pf12397	217995	ENSMUSG00000050244.8	Heatr1	5.48755e+06	6.23639e+06	7.39584e+06	8.77236e+06	6.02743e+06	6.90973e+06	4.81576e+06	6.04524e+06	3.16427e+06	5.36358e+06	3.25966e+06	4.87303e+06	1
High	Master Protein	G3X9K3	Brefeldin A-inhibited guanine nucleotide-exchange protein 1 [OS=Mus musculus]	0	7.738	1	3	22	3	1846	208.4	5.86	87	3.43	3	3	Pf01369, Pf09324, Pf12783	211673	ENSMUSG00000067851.11	Arfgef1	1.10077e+06	1.34103e+06	1.31728e+06	1.01336e+06	1.09974e+06	1.03058e+06	966015	1.29992e+06	563590	619589	594745	726807	1
High	Master Protein	G3X9M0	28S ribosomal protein S29, mitochondrial [OS=Mus musculus]	0	46.388	11	4	39	4	396	45.3	9.11	361	42.42	4	4	Pf05673, Pf10236	65111	ENSMUSG00000068921.14	Dap3	3.29319e+06	3.8769e+06	3.01737e+06	3.9367e+06	3.77e+06	4.10715e+06	2.89003e+06	3.75807e+06	1.29096e+06	2406967	2.03883e+06	2.89653e+06	1
High	Master Protein	G3X9Q6	La-related protein 4 [OS=Mus musculus]	0	6.467	3	2	28	2	719	79.7	6.51	26	0	2	2	Pf05383, Pf14259	207214	ENSMUSG00000023025.15	Larp4	818919	751820	885586	856235	725519	768624	718667	728778	378893	523517	392364	542065	1
High	Master Protein	G3X9T7	Galectin [OS=Mus musculus]	0	55.966	19	6	61	6	353	40	9.31	817	77.59	6	6	Pf00337	16859	ENSMUSG00000001123.15	Lgals9	2.96777e+06	3.40375e+06	1.98417e+06	1.59164e+07	4.85889e+06	5.63472e+06	2.60446e+06	3299423	848914	9.7316e+06	2.62771e+06	3.97383e+06	1
High	Master Protein	G3X9U9	mitochondrial fission 1 protein [OS=Mus musculus]	0	25.61	17	2	26	2	145	16.3	9.25	470	35.49	2	2	Pf14852, Pf14853	66437	ENSMUSG00000019054.13	Fis1	2.60822e+06	3.0571e+06	3.20426e+06	3.47267e+06	3.91702e+06	4.54656e+06	2.28892e+06	2.9634e+06	1.37093e+06	2.12325e+06	2.11834e+06	3.20642e+06	1
High	Master Protein	G3XA09	apoptotic protease-activating factor 1 [OS=Mus musculus]	0	3.697	1	1	2	1	1238	139.8	6.46	0	0	1	1	Pf00400, Pf00619, Pf00931, Pf08662, Pf13191	11783	ENSMUSG00000019979.12	Apaf1	273914	311014	334724	356827	335547	335483	240382	301482	143210	218170	181466	236596	1
High	Master Protein	G3XA66	Metaxin-1 [OS=Mus musculus]	0	55.386	20	6	88	6	298	33.6	6.62	938	91.21	6	6	Pf10568, Pf11801, Pf14497		ENSMUSG00000064068.13		4.63149e+06	5.07807e+06	4.17315e+06	4.99901e+06	5.04206e+06	5.72584e+06	4.0645e+06	4.92243e+06	1.78546e+06	3056485	2.72677e+06	4.0381e+06	1
High	Master Protein	G5DDB7	Phosphoinositide phospholipase C [OS=Mus musculus]	0	16.242	4	3	18	3	782	88.8	6.65	118	7.77	3	3	Pf00168, Pf00169, Pf00387, Pf00388, Pf09279, Pf14788	18799	ENSMUSG00000010660.3	Plcd1	1.21468e+06	1.37074e+06	1.27929e+06	1.53235e+06	1.51479e+06	1.58906e+06	1.06598e+06	1.32873e+06	547335	936907	819205	1.12067e+06	1
High	Master Protein	G5E829	Plasma membrane calcium-transporting ATPase 1 [OS=Mus musculus]	0	337.45	28	27	480	17	1220	134.7	5.91	5281	574.88	26	27	Pf00122, Pf00689, Pf00690, Pf00702, Pf08282, Pf12424, Pf12710, Pf13246	67972	ENSMUSG00000019943.10	Atp2b1	3.36201e+07	4.00463e+07	3.30877e+07	3.26248e+07	3.79137e+07	3.66742e+07	2.95043e+07	3.88189e+07	1.41564e+07	1.99474e+07	2.05039e+07	2.58642e+07	1
High	Master Protein	G5E850	cytochrome b-5, isoform CRA_a [OS=Mus musculus]	0	34.091	44	3	94	3	98	11.1	5.3	1217	127.45	3	3	Pf00173	109672	ENSMUSG00000024646.13	Cyb5; Cyb5a	4.26424e+06	4.35184e+06	4.35112e+06	5.72369e+06	4.44905e+06	5.48181e+06	3.74221e+06	4.21845e+06	1.8616e+06	3499565	2.40607e+06	3.86599e+06	1
High	Master Protein	G5E866	splicing factor 3B subunit 1 [OS=Mus musculus]	0	903.335	54	55	1782	55	1304	145.7	7.09	23190	2552.03	55	55	Pf02161, Pf08920, Pf12815, Pf13513	81898	ENSMUSG00000025982.13	Sf3b1	2.2934e+08	2.27514e+08	2.54343e+08	2.52895e+08	2.32974e+08	2.34588e+08	2.01264e+08	2.20541e+08	1.08819e+08	1.54624e+08	1.25993e+08	1.65441e+08	1	Oxidation [P342; P370; P372; P437; P615]
High	Master Protein	G5E881	Phosphatidate cytidylyltransferase, mitochondrial [OS=Mus musculus]	0.003	2.91	4	1	2	1	337	37.9	9.11	18	0	1	1	Pf09139	68971	ENSMUSG00000030316.13	Tamm41	593626	734453	629246	695214	760870	841211	520954	711942	269219	425066	411482	593257	1
High	Master Protein	G5E895	Aldo-keto reductase family 1, member B10 (Aldose reductase) [OS=Mus musculus]	0	39.308	19	6	46	1	316	35.8	7.28	291	35.97	6	6	Pf00248	67861	ENSMUSG00000061758.13	Akr1b10	175069	348310		101413	360498	260302	153637	337634		62005.6	194959	183576	1
High	Master Protein	G5E897	KDEL (Lys-Asp-Glu-Leu) containing 2, isoform CRA_b [OS=Mus musculus]	0	44.494	14	6	66	6	503	57.7	7.74	689	71.12	5	6	Pf00630, Pf05686, Pf13524	68304	ENSMUSG00000034487.4	Kdelc2	5.38165e+06	5.44933e+06	4.67773e+06	6.52585e+06	4.33825e+06	5.17264e+06	4.72283e+06	5.28232e+06	2.00134e+06	3.99002e+06	2.34614e+06	3.64796e+06	1
High	Master Protein	G5E8B1	protein tyrosine phosphatase, non-receptor type 13 [OS=Mus musculus]	0	63.321	4	6	60	6	2451	270.1	6.35	728	81.58	6	6	Pf00102, Pf00373, Pf00595, Pf00782, Pf09379, Pf09380, Pf13180	19249	ENSMUSG00000034573.14	Ptpn13	3.39834e+06	3.73335e+06	3.68003e+06	3.17918e+06	3.64388e+06	3.66651e+06	2.98232e+06	3.61892e+06	1.57448e+06	1.94381e+06	1.97063e+06	2.58577e+06	1
High	Master Protein	G5E8F8	Integrin beta [OS=Mus musculus]	0	13.426	3	2	34	2	816	90	6.25	168	27.41	2	2	Pf00362, Pf07965, Pf08725, Pf10075	16419	ENSMUSG00000022817.14	Itgb5	671762	732043	616292	658527	682576	836451	589525	709606	263677	402635	369140	589900	1
High	Master Protein	G5E8G6	myosin Vb, isoform CRA_c [OS=Mus musculus]	0	312.447	24	32	416	29	1818	210.4	7.09	4625	483.99	32	32	Pf00063, Pf01576, Pf01843, Pf02463, Pf03938, Pf04111, Pf05557, Pf05622, Pf05667, Pf07888, Pf07926, Pf12128, Pf13514	17919	ENSMUSG00000025885.18	Myo5b	2.77452e+07	3.21289e+07	3.3214e+07	3.43808e+07	3.31482e+07	4.09461e+07	2.43486e+07	3.11442e+07	1.42104e+07	2.1021e+07	1.79267e+07	2.88769e+07	1	Oxidation [P201]
High	Master Protein	G5E8I8	Calcium homeostasis endoplasmic reticulum protein [OS=Mus musculus]	0	51.574	11	8	88	8	949	107.6	9.33	413	85.49	8	8	Pf01585, Pf01805, Pf04818	27967	ENSMUSG00000052488.7	Cherp	4.49547e+06	3.75731e+06	5.17182e+06	5.66477e+06	4.42485e+06	4.44e+06	3.94514e+06	3.64215e+06	2.21273e+06	3.46354e+06	2.39298e+06	3.13127e+06	1
High	Master Protein	G5E8J2	Ankyrin 1, erythroid [OS=Mus musculus]	0	89.327	8	9	34	9	1848	202.4	6.65	135	27.13	9	9	Pf00023, Pf00531, Pf00791, Pf12796, Pf13606, Pf13637, Pf13857	11733	ENSMUSG00000031543.18	Ank1	3.55291e+06	1.71851e+06	1.52505e+06	1.53597e+06	1.4986e+06	1.46543e+06	3.11796e+06	1.66584e+06	652485	939122	810450	1.03348e+06	1
High	Master Protein	G5E8J3	bromodomain and WD repeat domain containing 2, isoform CRA_a [OS=Mus musculus]	0	48.196	8	7	56	7	1223	135.9	7.11	126	44.15	7	7		207425	ENSMUSG00000042055.13	Wdr11	2.10531e+06	2.93496e+06	1.77236e+06	2.06671e+06	1.63389e+06	2.05446e+06	1.84758e+06	2.84501e+06	758296	1.26362e+06	883614	1.44889e+06	1
High	Master Protein	G5E8K5-1	Ankyrin-3 [OS=Mus musculus]	0	186.646	11	19	324	18	1961	213.9	6.7	2639	361.86	19	19	Pf00023, Pf00531, Pf00791, Pf12796, Pf13606, Pf13637, Pf13857	11735	ENSMUSG00000069601.14	Ank3	1.56941e+07	1.97999e+07	1.69319e+07	1.91998e+07	2.00336e+07	2.07438e+07	1.37728e+07	1.91931e+07	7.24421e+06	1.17391e+07	1.08343e+07	1.46294e+07	1
High	Master Protein	G5E8R1	tropomyosin 1, alpha, isoform CRA_j [OS=Mus musculus]	0	178.029	45	15	351	1	248	28.5	4.77	4179	488.45	15	15	Pf00261, Pf12718	22003	ENSMUSG00000032366.15	Tpm1	2.00935e+06	1.34346e+06	1.02423e+06	2.13506e+06	1.78935e+06	1.49895e+06	1.76336e+06	1.30229e+06	438210	1.30541e+06	967686	1.05712e+06	1
High	Master Protein	G5E8R3	pyruvate carboxylase [OS=Mus musculus]	0	647.662	46	41	1250	41	1178	129.6	6.71	16378	1738.28	41	40	Pf00289, Pf00364, Pf00682, Pf02222, Pf02436, Pf02785, Pf02786, Pf07478, Pf08443, Pf13533, Pf13535, Pf15632	18563	ENSMUSG00000024892.15	Pcx	1.59419e+08	2.34879e+08	1.19734e+08	1.50899e+08	2.01753e+08	2.2336e+08	1.39903e+08	2.2768e+08	5.12275e+07	9.22625e+07	1.09109e+08	1.57523e+08	1	Oxidation [P867; K886]
High	Master Protein	G5E8R4	SAPS domain family, member 3, isoform CRA_c [OS=Mus musculus]	0	97.247	17	10	113	10	873	97.8	4.58	715	106.84	9	10	Pf04499	52036	ENSMUSG00000024908.14	Ppp6r3	4.33778e+06	5.79407e+06	3.96501e+06	4.60311e+06	5.25783e+06	5.51016e+06	3.80674e+06	5.61648e+06	1.69641e+06	2.81443e+06	2.84346e+06	3.88599e+06	1
High	Master Protein	G5E8V9	ADP-ribosylation factor-interacting protein 1 [OS=Mus musculus]	0	15.376	7	2	15	2	373	41.5	6.76	116	5.71	2	2	Pf06456	99889	ENSMUSG00000074513.9	Arfip1	1.32263e+06	1.85006e+06	195079		1.4927e+06	1.37022e+06	1.16072e+06	1.79336e+06	83463.6		807261	966335	1
High	Master Protein	G5E905	RIKEN cDNA 9030612M13 [OS=Mus musculus]	0	7.888	2	1	2	1	615	71.5	8.28	0	2.1	1	1	Pf01352, Pf13465	208292	ENSMUSG00000024298.14	Zfp871	161697	202805	179323	206987	179305	202473	141902	196589	76722.3	126555	96969.1	142792	1
High	Master Protein	G5E911	DNA segment, Chr 6, Wayne State University 176, expressed, isoform CRA_f [OS=Mus musculus]	0	10.578	5	1	10	1	247	27	8.66	86	12.29	1	1	Pf01098	27999	ENSMUSG00000029672.16	Fam3c	673073	665184	825561	788806	870636	792607	590675	644797	353211	482290	470844	558979	1
High	Master Protein	G5E924	Heterogeneous nuclear ribonucleoprotein L [OS=Mus musculus]	0	893.546	61	32	3050	32	615	66.9	8.18	45406	5886.95	32	32	Pf00076, Pf13893, Pf14259		ENSMUSG00000015165.16		8.97249e+08	7.03835e+08	9.00144e+08	9.45464e+08	7.61155e+08	7.65596e+08	7.87407e+08	6.82263e+08	3.85121e+08	5.78073e+08	4.11636e+08	5.3993e+08	1	Oxidation [P277; P398; P403; P408; K444; P445; P487; K594]
High	Master Protein	G8JL35	MOB-like protein phocein [OS=Mus musculus]	0	30.401	16	2	31	2	183	21	6.2	120	42.68	2	2	Pf03637		ENSMUSG00000025979.13		1.094e+06	1.71594e+06	1.05649e+06	1.75238e+06	1.50241e+06	1.79649e+06	960074	1.66335e+06	452013	1.07143e+06	812509	1.26696e+06	1
High	Master Protein	G8JL51	DNA-directed RNA polymerase I subunit RPA49 [OS=Mus musculus]	0	7.005	5	2	6	2	407	45.9	9.16	23	1.65	2	2	Pf06870		ENSMUSG00000028318.14		408835	463460	601866	467029	467431	506151	358785	449256	257505	285550	252789	356959	1
High	Master Protein	H3BIX4	Neuroplastin [OS=Mus musculus]	0	29.721	8	1	31	1	221	24.4	6.1	315	34.72	1	1	Pf00002		ENSMUSG00000032336.17		1.01974e+06	1.74479e+06	1.21164e+06	1.31477e+06	1.33735e+06	1.30489e+06	894903	1.69131e+06	518391	803874	723243	920262	1
High	Master Protein	H3BIZ5	Protein ECT2 [OS=Mus musculus]	0.006	2.226	9	1	4	1	174	19.4	4.67	0	1.8	1	1			ENSMUSG00000027699.19		1.27334e+07	1.49012e+07	1.14753e+07	1.43804e+07	1.41176e+07	9.35603e+06	1.11746e+07	1.44445e+07	4.90965e+06	8.79244e+06	7.63485e+06	6.59826e+06	1
High	Master Protein	H3BJ49	Ceramide synthase 5 [OS=Mus musculus]	0	10.616	8	2	18	2	241	28.8	9.41	84	15.25	2	2	Pf00046, Pf03798		ENSMUSG00000023021.15		574418	743993	794154	818712	804631	822941	504098	721190	339774	500575	435148	580372	1
High	Master Protein	H3BJ53	Rho guanine nucleotide exchange factor 6 [OS=Mus musculus]	0.001	3.581	7	2	14	1	302	34.5	5.82	0	0	2	2	Pf00018, Pf00621, Pf07653, Pf14604		ENSMUSG00000031133.12		172023	213134	75413.8	146447	157083	150577	150964	206602	32265.4	89540.2	84951.2	106193	1
High	Master Protein	H3BJ78	Synaptogyrin-2 [OS=Mus musculus]	0	6.246	7	1	14	1	147	15.7	6.49	61	13.52	1	1	Pf01284		ENSMUSG00000048277.15		2.24777e+06	2.77013e+06	2.3952e+06	2.52701e+06	2.71652e+06	3.54339e+06	1.9726e+06	2.68523e+06	1.02477e+06	1.54506e+06	1.4691e+06	2.49895e+06	1
High	Master Protein	H3BJU7	Rho guanine nucleotide exchange factor 2 [OS=Mus musculus]	0	112.122	15	12	196	12	956	108.5	6.87	1570	197.03	12	12	Pf00130, Pf00169, Pf00621, Pf07649		ENSMUSG00000028059.15		1.2866e+07	1.41702e+07	2.49234e+07	1.91788e+07	2.04758e+07	1.65291e+07	1.1291e+07	1.37359e+07	1.06633e+07	1.17263e+07	1.10734e+07	1.1657e+07	1
High	Master Protein	H3BJY2	Arf-GAP with SH3 domain, ANK repeat and PH domain-containing protein 1 [OS=Mus musculus]	0	9.051	2	1	2	1	1144	126.9	7.43	23	0	1	1	Pf00018, Pf00023, Pf00169, Pf01412, Pf12796, Pf13637, Pf13857, Pf14604		ENSMUSG00000022377.16		180071	198732	187055	240046	193976	221061	158027	192641	80030.2	146769	104903	155901	1
High	Master Protein	H3BK33	Mediator of RNA polymerase II transcription subunit 23 [OS=Mus musculus]	0	13.378	1	1	18	1	1010	115.3	7.42	283	24.45	1	1	Pf11573		ENSMUSG00000019984.16		491387	443406	548569	541902	471465	356872	431231	429816	234702	331328	254970	251681	1
High	Master Protein	H3BK84	cAMP-dependent protein kinase type II-beta regulatory subunit [OS=Mus musculus]	0	17.436	14	2	4	1	256	28.4	5.43	35	2.11	2	2	Pf00027		ENSMUSG00000002997.15		252056	365976	304612	226721	288881	297602	221199	354759	130327	138621	156228	209881	1
High	Master Protein	H3BKL6	Melanoma inhibitory activity protein 2 [OS=Mus musculus]	0	7.243	3	2	6	2	701	79.3	5.21	23	1.89	2	2	Pf04111, Pf04156, Pf05701, Pf05911, Pf07926, Pf09726, Pf12128, Pf13851		ENSMUSG00000021000.15		1.95679e+06	1.45852e+06	902309	182784	1.44186e+06	2.44611e+06	1.71724e+06	1.41381e+06	386048	111757	779762	1.7251e+06	1
High	Master Protein	H3BKM2	Nuclear-interacting partner of ALK [OS=Mus musculus]	0	14.373	8	2	8	2	459	50.5	5.5	64	6.25	2	2	Pf07967		ENSMUSG00000039130.18		597233	660582	583945	670890	600176	756860	524119	640336	249838	410194	324578	533769	1
High	Master Protein	H3BKU1	protein phosphatase 2 (formerly 2A), regulatory subunit A (PR 65), beta isoform, isoform CRA_b [OS=Mus musculus]	0	78.182	11	7	133	4	667	73.3	5.2	2082	211.52	7	7	Pf02985, Pf13513, Pf13646	73699	ENSMUSG00000032058.14	Ppp2r1b	2.91468e+06	3.16872e+06	2.96932e+06	3.00639e+06	2.91466e+06	2.86613e+06	2.55786e+06	3.0716e+06	1.27041e+06	1.83816e+06	1.57626e+06	2.02131e+06	1
High	Master Protein	H3BLL2	ATP synthase mitochondrial F1 complex assembly factor 1 [OS=Mus musculus]	0	6.412	3	1	2	1	348	38.8	5.86	0	0	1	1	Pf06644	230649	ENSMUSG00000028710.16	Atpaf1	248858	304161	270084	360930	348299	377050	218392	294838	115554	220679	188362	265911	1
Medium	Master Protein	H3BLL3	Leucine-rich repeat and calponin homology domain-containing protein 4 OS=Mus musculus GN=Lrch4 PE=1 SV=1	0.014	1.82	1	1	5	1	649	69.9	6.89	14		1		Pf00307, Pf11971, Pf12799, Pf13855	231798	ENSMUSG00000093445.7	Lrch4	202914	211944	195289	209424	232311	236199	178073	205448	83553.3	128046	125635	166577	1
High	Master Protein	H7BWX9	small ubiquitin-related modifier 2 [OS=Mus musculus]	0	14.495	23	1	22	1	53	6	8.91	404	31.83	1	1	Pf11976		ENSMUSG00000020738.16		2.529e+06	2.70905e+06	2.37941e+06	2.41778e+06	3.17077e+06	2.98651e+06	2.2194e+06	2.62602e+06	1.01802e+06	1.47827e+06	1.71477e+06	2.10621e+06	1
High	Master Protein	H7BX01	Dynamin-like 120 kDa protein, mitochondrial [OS=Mus musculus]	0	127.111	18	13	115	13	978	113.2	7.33	1009	115.46	13	13	Pf00350, Pf01926	74143	ENSMUSG00000038084.16	Opa1	9.33706e+06	7.5398e+06	8.99489e+06	9.43839e+06	7.48985e+06	8.00231e+06	8.19401e+06	7.30871e+06	3.84841e+06	5.7708e+06	4.05054e+06	5.64356e+06	1
High	Master Protein	H7BX59	tRNA pseudouridine synthase [OS=Mus musculus]	0	6.132	2	1	2	1	441	49.6	8.84	26	1.83	1	1	Pf01416	56361	ENSMUSG00000029507.16	Pus1	607533	788562	696012	815789	774145	727868	533159	764393	297785	498788	418661	513323	1
High	Master Protein	H7BX88	Carnitine O-acetyltransferase [OS=Mus musculus]	0	37.016	9	5	43	5	605	68.6	8.07	295	35.23	5	5	Pf00755		ENSMUSG00000026853.15		2.15993e+06	3.73492e+06	2.14552e+06	2.67187e+06	3.32738e+06	3.14816e+06	1.89551e+06	3.62044e+06	917948	1.63363e+06	1.79946e+06	2.22021e+06	1
High	Master Protein	H7BX95	Serine/arginine-rich-splicing factor 1 [OS=Mus musculus]	0	208.58	52	16	994	15	253	28.3	10.08	9286	1131.84	16	16	Pf00076, Pf13893, Pf14259		ENSMUSG00000018379.17; ENSMUSG00000098301.6		2.11284e+08	1.74423e+08	2.54985e+08	2.40974e+08	2.23296e+08	2.39368e+08	1.85419e+08	1.69077e+08	1.09094e+08	1.47336e+08	1.2076e+08	168812394	1
High	Master Protein	H7BX99	Prothrombin [OS=Mus musculus]	0	54.77	11	7	66	7	617	70.2	6.43	313	54.21	7	7	Pf00051, Pf00089, Pf00594, Pf09342, Pf09396		ENSMUSG00000027249.15		6.12003e+06	6.14631e+06	6.41446e+06	5.49519e+06	5.90268e+06	4.47892e+06	5.37081e+06	5.95793e+06	2.74439e+06	3.35986e+06	3.19219e+06	3.15872e+06	1
High	Master Protein	H9KV12	Leucine-rich repeats and WD repeat domain-containing 1 (Fragment) OS=Mus musculus GN=Lrwd1 PE=1 SV=1	0	8.439	5	1	9	1	216	24.2	6.68	155		1		Pf12799, Pf13855		ENSMUSG00000029703.10		418804	406347	538399	641947	508174	569340	367533	393893	230351	392498	274823	401522	1
High	Master Protein	H9KV15	Protein SON [OS=Mus musculus]	0	72.174	8	10	135	10	2343	253.9	5.4	774	133.22	10	10		20658	ENSMUSG00000022961.17	Son	2.38117e+06	4.7877e+06	7.09268e+06	6.58108e+06	7.75426e+06	7.41919e+06	2.08966e+06	4.64096e+06	3.03456e+06	4.02379e+06	4.19354e+06	5.23232e+06	1	Oxidation [P342; P353]
High	Master Protein	I1E4X5	RIKEN cDNA 9030624J02 gene [OS=Mus musculus]	0	14.048	3	3	22	3	991	111.9	7.58	143	16.78	3	3		71517	ENSMUSG00000030982.18	9030624J02Rik	1.4234e+06	2.01204e+06	1.35664e+06	1.5208e+06	1.52715e+06	1.54233e+06	1.24914e+06	1.95037e+06	580431	929846	825892	1.08771e+06	1
High	Master Protein	I4DCY6	Sigma-1 receptor short form [OS=Mus musculus]	0	28.505	20	2	56	2	106	12.1	6.51	430	78.29	2	2	Pf04622	18391		Sigmar1	1.90561e+06	2.31067e+06	768611	1.93686e+06	2.22907e+06	2.46103e+06	1.67232e+06	2.23985e+06	328846	1.18423e+06	1.20549e+06	1.73562e+06	1
High	Master Protein	I7HIP8	Nuclear factor 1 [OS=Mus musculus]	0	16.946	4	2	62	1	493	55.1	9.03	682	64.04	2	2	Pf00859, Pf03165, Pf10524, Pf15362	18028	ENSMUSG00000008575.17	Nfib	1.05002e+06	987963	1.22598e+06	1.40837e+06	1.47802e+06	1.42064e+06	921480	957683	524528	861105	799318	1.0019e+06	1
High	Master Protein	I7HLV5	novel protein [OS=Mus musculus]	0	7.471	6	1	18	1	199	21.8	8.28	191	11.29	1	1		66294	ENSMUSG00000031399.15	Fam3a	430870	415206	401571	420558	479356	475318	378123	402480	171810	257137	259238	335214	1
High	Master Protein	J3JS24	alpha-1,3-mannosyl-glycoprotein 2-beta-N-acetylglucosaminyltransferase [OS=Mus musculus]	0	21.694	16	2	30	2	200	22.8	9.39	606	34.88	2	2	Pf03071	17308	ENSMUSG00000020346.16	Mgat1	732402	1.01336e+06	604945	794711	751160	922901	642740	982302	258822	485901	406231	650868	1
High	Master Protein	J3KMQ6	RIKEN cDNA 5730455P16 gene [OS=Mus musculus]	0	6.362	3	1	15	1	393	44.4	5.05	21	2.35	1	1	Pf15053		ENSMUSG00000057181.15		171431	249159	133285	233267	133314	176802	150444	241522	57025.3	142624	72096.8	124688	1
High	Master Protein	J3KMT7	Transducin-like enhancer protein 3 [OS=Mus musculus]	0	4.146	3	2	6	2	783	84.5	7.44	0	0	2	2	Pf00400, Pf03920		ENSMUSG00000032280.16		537039	642123	668580	512457	435175	432068	471295	622443	286048	313325	235344	304712	1
High	Master Protein	J3QK52	Nucleolar complex protein 2 homolog [OS=Mus musculus]	0	67.234	14	10	126	10	750	85.6	5.83	1620	127.88	10	9	Pf03715	57741	ENSMUSG00000095567.7	Noc2l	4.62164e+06	4.58855e+06	7.45601e+06	8.89818e+06	7.31311e+06	8.77901e+06	4.05585e+06	4.44792e+06	3.19001e+06	5.44051e+06	3.95496e+06	6.19132e+06	1
High	Master Protein	J3QMC5	Midasin [OS=Mus musculus]	0	24.783	1	5	18	5	5582	629.2	5.73	78	8.44	5	5	Pf00004, Pf02367, Pf07726, Pf07728, Pf13671	100019	ENSMUSG00000058006.12	Mdn1	1.17362e+06	1.38719e+06	1.91885e+06	1.93838e+06	1.76488e+06	1.59674e+06	1.02994e+06	1.34467e+06	820968	1.18516e+06	954453	1.12609e+06	1
High	Master Protein	J3QN89	Angio-associated migratory protein [OS=Mus musculus]	0	30.377	10	3	31	3	436	46.9	4.41	185	28.36	3	3	Pf00400, Pf14134	227290	ENSMUSG00000006299.13	Aamp	2.00811e+06	1.67355e+06	1.87247e+06	1.47557e+06	1.56553e+06	1.39033e+06	1.76228e+06	1.62226e+06	801127	902190	846643	980515	1
High	Master Protein	J3QNA5	Tumor necrosis factor alpha-induced protein 8 [OS=Mus musculus]	0	8.472	9	1	22	1	100	11.8	7.96	95	1.69	1	1	Pf05527		ENSMUSG00000062210.13		497677	789632	478882	470048	650343	813288	436751	765430	204887	287396	351708	573564	1
Medium	Master Protein	J3QNK5	Histone deacetylase complex subunit SAP130 [OS=Mus musculus]	0.02	1.584	1	1	2	1	1057	111.2	9.95	0	0	1	1	Pf07462		ENSMUSG00000024260.13		314579	339586	316390	386116	300675	317272	276068	329178	135365	236078	162607	223753	1
High	Master Protein	J3QNM3	Protein enabled homolog [OS=Mus musculus]	0	46.963	7	5	72	5	789	84.5	7.52	569	56.91	5	5	Pf00568, Pf08776		ENSMUSG00000022995.16		3.01045e+06	3.21949e+06	3.01791e+06	3.32622e+06	3.54796e+06	3.79323e+06	2.64191e+06	3.12081e+06	1.29119e+06	2.03371e+06	1.91876e+06	2.67514e+06	1
High	Master Protein	J3QNU1	Arginyl-tRNA--protein transferase 1 [OS=Mus musculus]	0	31.825	12	4	29	4	509	58.2	7.25	269	43.07	4	4	Pf04376, Pf04377	11907	ENSMUSG00000030850.17	Ate1	2.02001e+06	2.56344e+06	1.8696e+06	1.9548e+06	2.03055e+06	2.33331e+06	1.77272e+06	2.48487e+06	799896	1.1952e+06	1.09813e+06	1.64555e+06	1
High	Master Protein	J3QNU6	Beta-arrestin-1 [OS=Mus musculus]	0	34.656	16	5	34	5	419	47.1	6.55	51	22.19	5	5	Pf00339, Pf02752		ENSMUSG00000018909.15		1.95854e+06	2.10505e+06	1.72595e+06	2.32789e+06	1.97871e+06	1.76628e+06	1.71878e+06	2.04054e+06	738437	1.42331e+06	1.07009e+06	1.24566e+06	1
High	Master Protein	J3QNW0	DNA (Cytosine-5)-methyltransferase [OS=Mus musculus]	0	218.989	16	22	350	22	1501	169.9	7.69	3755	416.2	22	22	Pf00145, Pf01426, Pf02008, Pf12047	13433	ENSMUSG00000004099.16	Dnmt1	3.17324e+07	2.59759e+07	4.23041e+07	3.83397e+07	2.89574e+07	2.92996e+07	2.78477e+07	2.51798e+07	1.80995e+07	2.34416e+07	1.56603e+07	2.06633e+07	1
High	Master Protein	J3QNY1	predicted pseudogene 9242 [OS=Mus musculus]	0	694.49	53	25	2408	1	357	37.1	8.31	36359	4084.96	24	24	Pf00076, Pf13893, Pf14259		ENSMUSG00000096156.1		8.39448e+07	7.6116e+07	8.65821e+07	8.43897e+07	8.01624e+07	7.60948e+07	7.36682e+07	73783127	3.70436e+07	5.15974e+07	4.33522e+07	5.36652e+07	1	Oxidation [P6; K7; P48]; Acetyl [N-Term]
High	Master Protein	J3QP56	Acyl-protein thioesterase 1 [OS=Mus musculus]	0	23.554	14	3	55	3	224	23.7	7.06	546	41.56	3	3	Pf00561, Pf02230, Pf03959, Pf07859, Pf12695, Pf12697	18777	ENSMUSG00000025903.14	Lypla1	4.5655e+06	5.03054e+06	4.04781e+06	4.62201e+06	4.15922e+06	6.10312e+06	4.00659e+06	4.87636e+06	1.73183e+06	2.82598e+06	2.24932e+06	4.30417e+06	1
High	Master Protein	J7I1C3	RIF1 [OS=Mus musculus]	0	6.288	1	2	18	2	2418	265.7	5.63	74	9.24	2	2	Pf12231	51869		Rif1	365432	477451	338657	435610	343953	393249	320696	462818	144893	266340	186011	277335	1
High	Master Protein	K3W4L3	Prosaposin [OS=Mus musculus]	0	12.582	4	2	16	2	556	61.3	5.24	60	16.79	2	2	Pf02199, Pf03489, Pf05184		ENSMUSG00000004207.14		3.43959e+07	4.123e+07	3.57499e+07	4.42865e+07	4.2801e+07	4.60968e+07	30185154	39966356	15295406	27077550	23146980	32509378	1
Medium	Master Protein	K3W4M7	Putative ATP-dependent RNA helicase DHX33 [OS=Mus musculus]	0.041	0.964	17	1	2	1	82	8.7	11.77	0	0	1	1			ENSMUSG00000040620.15		137690	154380	92260.5			186318	120834	149649	39473.1			131399	1
High	Master Protein	K3W4Q8	Basigin [OS=Mus musculus]	0	49.716	29	4	70	4	218	24.1	5.36	912	101.69	4	4	Pf00047, Pf07679, Pf13927	12215	ENSMUSG00000023175.15	Bsg	6.36501e+06	4.9731e+06	5.9678e+06	6.09875e+06	7.15899e+06	5.80595e+06	5.5858e+06	4.82068e+06	2.55329e+06	3.72888e+06	3.87162e+06	4.09459e+06	1
High	Master Protein	K3W4S6	glycogenin [OS=Mus musculus]	0	20.749	14	4	19	4	377	41.9	6.02	84	19.68	4	4	Pf01501		ENSMUSG00000019528.18		2.39527e+06	2.4654e+06	2.4319e+06	2.53116e+06	2.87589e+06	2.67814e+06	2.10204e+06	2.38984e+06	1.04047e+06	1.5476e+06	1.55529e+06	1.88874e+06	1
High	Master Protein	K7E6F1	Serine (or cysteine) peptidase inhibitor, clade B, member 6a [OS=Mus musculus]	0	58.49	27	6	76	6	228	25.4	6.79	912	81.74	6	6	Pf00079		ENSMUSG00000060147.15		1.45458e+07	1.26834e+07	1.01158e+07	1.12178e+07	1.34041e+07	1.16524e+07	1.27651e+07	1.22947e+07	4.32797e+06	6.85879e+06	7.24899e+06	8.21776e+06	1
High	Master Protein	K7Q751	focal ashension kinase 1 [OS=Mus musculus]	0	37.353	5	4	40	4	1068	121	6.47	382	39.94	4	4	Pf00069, Pf00373, Pf03623, Pf07714, Pf14531	14083		Ptk2	2.97021e+06	2.19369e+06	2.14847e+06	1.75347e+06	1.86298e+06	1.34972e+06	2.60659e+06	2.12645e+06	919210	1.0721e+06	1.00751e+06	951881	1
High	Master Protein	M0QWP1	Agrin [OS=Mus musculus]	0	190.523	14	18	208	18	2034	216.5	6.15	2320	223.22	18	18	Pf00008, Pf00050, Pf00053, Pf00054, Pf01390, Pf02210, Pf03137, Pf03146, Pf07648	11603	ENSMUSG00000041936.18	Agrn	7.98336e+06	1.00304e+07	9.9453e+06	1.11697e+07	1.18089e+07	1.3471e+07	7.00603e+06	9.72296e+06	4.25504e+06	6.82935e+06	6.38629e+06	9.5003e+06	1
High	Master Protein	M1VB37	Metastasis-associated protein MTA1 isoform 7 [OS=Mus musculus]	0	134.368	30	15	237	2	627	71	9.04	2311	292.95	15	15	Pf00249, Pf00320, Pf01426, Pf01448	116870		Mta1	1.34799e+07	1.29143e+07	1.54673e+07	1.4891e+07	1.28339e+07	1.48181e+07	1.18297e+07	1.25184e+07	6.61759e+06	9.10463e+06	6.94065e+06	1.04504e+07	1
High	Master Protein	N0E4C5	Casein kinase II subunit beta [OS=Mus musculus]	0	23.381	19	4	78	4	217	25.1	5.27	228	66.36	4	4	Pf01214	13001		Csnk2b	1.24498e+07	1.14973e+07	1.27959e+07	1.58726e+07	1.56862e+07	1.51337e+07	1.09257e+07	1.11449e+07	5.47466e+06	9.70476e+06	8.48316e+06	1.06729e+07	1
High	Master Protein	O08528	Hexokinase-2 [OS=Mus musculus]	0	53.117	8	7	116	4	917	102.5	6.11	847	110.3	7	7	Pf00349, Pf03727	15277	ENSMUSG00000000628.10	Hk2	776603	1.54618e+06	1.67207e+06	793205	1.42884e+06	1.3463e+06	681531	1.4988e+06	715384	484980	772722	949464	1
High	Master Protein	O08529	Calpain-2 catalytic subunit [OS=Mus musculus]	0	192.447	30	18	328	18	700	79.8	4.96	3323	397.23	18	18	Pf00648, Pf01067, Pf13833	12334	ENSMUSG00000026509.15	Capn2	2.75962e+07	3.27287e+07	2.59209e+07	2.50704e+07	2.76305e+07	2.68154e+07	2.42178e+07	3.17256e+07	1.10901e+07	1.53285e+07	1.49427e+07	1.89113e+07	1
High	Master Protein	O08547	Vesicle-trafficking protein SEC22b [OS=Mus musculus]	0	114.584	47	9	235	9	215	24.7	8.51	3957	329.96	9	8	Pf00957, Pf13774	20333	ENSMUSG00000027879.9	Sec22b	1.85217e+07	1.76364e+07	1.9354e+07	2.07012e+07	2.44031e+07	2.31791e+07	1.62543e+07	1.70959e+07	8.2805e+06	1.26571e+07	1.31973e+07	1.63468e+07	1
High	Master Protein	O08553	Dihydropyrimidinase-related protein 2 [OS=Mus musculus]	0	440.945	59	23	967	20	572	62.2	6.38	16157	1566.69	23	23	Pf01979, Pf07969, Pf13147, Pf13594	12934	ENSMUSG00000022048.8	Dpysl2	1.36665e+08	1.50267e+08	1.43859e+08	1.49717e+08	1.46892e+08	1.51838e+08	1.19935e+08	1.45662e+08	6.15492e+07	9.15395e+07	7.94397e+07	1.07082e+08	1
High	Master Protein	O08579	Emerin [OS=Mus musculus]	0	78.358	36	7	112	7	259	29.4	5.01	1139	128.48	7	7	Pf03020	13726	ENSMUSG00000001964.14	Emd	6.22176e+06	4.86335e+06	6.4585e+06	6.78034e+06	5.37494e+06	6.11689e+06	5.46008e+06	4714295	2.76323e+06	4.14562e+06	2.90679e+06	4.31388e+06	1
High	Master Protein	O08582	GTP-binding protein 1 [OS=Mus musculus]	0	51.645	10	4	44	4	668	72.3	8.29	400	47.26	4	4	Pf00009, Pf03143, Pf03144	14904	ENSMUSG00000042535.8	Gtpbp1	2.54364e+06	2.75575e+06	2.53047e+06	2.80628e+06	2.57593e+06	1.88135e+06	2.23224e+06	2.67129e+06	1.08265e+06	1.71581e+06	1.39307e+06	1.32681e+06	1
High	Master Protein	O08583-1	THO complex subunit 4 [OS=Mus musculus]	0	82.748	31	4	137	4	255	26.9	11.15	1918	218.98	4	4	Pf00076, Pf13893, Pf14259	21681	ENSMUSG00000025134.2	Alyref	7.43287e+06	7.91819e+06	1.00435e+07	9.60808e+06	6.41808e+06	9.53977e+06	6.52293e+06	7.6755e+06	4.29706e+06	5.87455e+06	3.47093e+06	6.72784e+06	1	Oxidation [P174]
High	Master Protein	O08599	Syntaxin-binding protein 1 [OS=Mus musculus]	0	38.434	10	5	75	5	594	67.5	6.96	828	82.2	4	5	Pf00995	20910	ENSMUSG00000026797.16	Stxbp1	2.53336e+06	2.54056e+06	2.52574e+06	2.3821e+06	2.4235e+06	2.69358e+06	2.22323e+06	2.4627e+06	1.08062e+06	1.45646e+06	1.31064e+06	1.89962e+06	1
High	Master Protein	O08600	endonuclease G, mitochondrial [OS=Mus musculus]	0.003	2.776	3	1	2	1	294	32.2	9.54	39	2.18	1	1	Pf01223	13804	ENSMUSG00000015337.5	Endog	1.25872e+06	1.74674e+06	1.75006e+06	1.81953e+06	1.90862e+06	2.10257e+06	1104627	1.6932e+06	748751	1.11249e+06	1.03219e+06	1.48282e+06	1
High	Master Protein	O08663	methionine aminopeptidase 2 [OS=Mus musculus]	0	177.249	36	13	282	13	478	52.9	5.82	2728	430.04	13	13	Pf00557	56307	ENSMUSG00000036112.15	Metap2	3.91416e+07	3.6082e+07	4.94141e+07	4.40681e+07	3.62925e+07	3.59628e+07	3.43499e+07	3.49761e+07	2.11415e+07	2.6944e+07	1.96272e+07	2.53625e+07	1
High	Master Protein	O08677-1	kininogen-1 [OS=Mus musculus]	0	172.745	30	15	365	15	661	73.1	6.54	2674	480.71	15	15	Pf00031	16644		Kng1	3.83322e+07	3.58442e+07	3.50173e+07	3.53897e+07	3.66721e+07	2.64503e+07	3.36395e+07	3.47456e+07	1.4982e+07	2.16379e+07	1.98324e+07	1.86538e+07	1
High	Master Protein	O08688	calpain-5 [OS=Mus musculus]	0	6.039	2	1	3	1	640	72.9	7.36	0	4.31	1	1	Pf00168, Pf00648, Pf01067	12337	ENSMUSG00000035547.14	Capn5	278020	359929	216297	377416	303307	359597	243984	348898	92541.4	230759	164030	253602	1
Medium	Master Protein	O08710	thyroglobulin [OS=Mus musculus]	0.024	1.446	0	1	1	1	2766	304.3	5.49	0		1		Pf00086, Pf00135, Pf07699, Pf07859	21819	ENSMUSG00000053469.13	Tg	1.76956e+06	1.25085e+06	1.18421e+06	1.06858e+06	1.02592e+06	784444	1.55293e+06	1.21252e+06	506657	653350	554824	553222	1
Medium	Master Protein	O08715	A-kinase anchor protein 1, mitochondrial [OS=Mus musculus]	0.035	1.143	2	1	5	1	857	92.1	5.02	0	0	1	1	Pf00013, Pf00567, Pf13014	11640	ENSMUSG00000018428.15	Akap1	1.78441e+06	1.95735e+06	1.95591e+06	2.10043e+06	2.02526e+06	2.24384e+06	1.56596e+06	1.89736e+06	836823	1284242	1095270	1.58245e+06	1	Oxidation [P339; P345; K348]
High	Master Protein	O08734	bcl-2 homologous antagonist/killer [OS=Mus musculus]	0	48.676	29	6	92	6	209	23.3	6.18	742	104.6	6	6	Pf00452	12018	ENSMUSG00000057789.13	Bak1	6.49226e+06	8.93146e+06	6.55493e+06	9.23542e+06	7.9319e+06	7.69037e+06	5.69748e+06	8.65771e+06	2.80449e+06	5.6467e+06	4.28961e+06	5.42357e+06	1
High	Master Protein	O08749	Dihydrolipoyl dehydrogenase, mitochondrial [OS=Mus musculus]	0	228.337	45	16	424	16	509	54.2	7.9	6039	706.6	16	16	Pf00070, Pf00890, Pf01134, Pf01946, Pf02852, Pf03486, Pf07992, Pf12831, Pf13450	13382	ENSMUSG00000020664.10	Dld	8.32334e+07	8.45593e+07	7.67345e+07	8.025e+07	8.46254e+07	8.87274e+07	7.30439e+07	8.19676e+07	3.28304e+07	4.90663e+07	4.57658e+07	6.25742e+07	1
High	Master Protein	O08759	Ubiquitin-protein ligase E3A [OS=Mus musculus]	0	109.403	16	12	177	12	870	99.8	5.08	1398	160.95	12	12	Pf00632	22215	ENSMUSG00000025326.12	Ube3a	8.31628e+06	9.88916e+06	8.1063e+06	9.17066e+06	9.2572e+06	8.487e+06	7.29819e+06	9.58607e+06	3.46823e+06	5.6071e+06	5.00634e+06	5.98539e+06	1
High	Master Protein	O08795-1	Glucosidase 2 subunit beta [OS=Mus musculus]	0	106.779	20	10	280	10	521	58.8	4.46	4231	367.44	10	10	Pf07915, Pf12999, Pf13015	19089	ENSMUSG00000003402.14	Prkcsh	2.80568e+07	2.83783e+07	2.73581e+07	3.08131e+07	3.016e+07	2.99034e+07	2.4622e+07	2.75085e+07	1.1705e+07	1.88397e+07	16310647	2.10891e+07	1
High	Master Protein	O08807	Peroxiredoxin-4 [OS=Mus musculus]	0	196.661	64	14	386	12	274	31	7.15	4177	599.28	13	14	Pf00578, Pf08534, Pf10417	53381	ENSMUSG00000025289.15	Prdx4	3.0704e+07	3.22052e+07	2.85865e+07	3.15232e+07	3.056e+07	3.54557e+07	2.69452e+07	3.12181e+07	1.22305e+07	1.92739e+07	1.6527e+07	2.50048e+07	1
High	Master Protein	O08915	AH receptor-interacting protein [OS=Mus musculus]	0	9.042	7	2	8	2	330	37.6	6.4	24	3.9	2	2	Pf00254	11632	ENSMUSG00000024847.14; ENSMUSG00000097319.7	Aip	1.16435e+06	1.32015e+06	1.20746e+06	1.44924e+06	1.57512e+06	1.4396e+06	1.02181e+06	1.27969e+06	516607	886090	851832	1.01527e+06	1
High	Master Protein	O09005	Sphingolipid delta(4)-desaturase DES1 [OS=Mus musculus]	0	45.601	11	2	42	2	323	38.2	7.77	410	74.21	2	2	Pf00487, Pf08557	13244	ENSMUSG00000038633.5	Degs1	2.24067e+06	2.23746e+06	2.59848e+06	1.45949e+06	2.95416e+06	3.37139e+06	1.96637e+06	2.16889e+06	1.11175e+06	892357	1.59762e+06	2.37765e+06	1
High	Master Protein	O09044	Synaptosomal-associated protein 23 [OS=Mus musculus]	0	25.382	15	2	14	2	210	23.2	4.98	159	16.82	2	2	Pf00835, Pf05739	20619	ENSMUSG00000027287.14	Snap23	667239	1.20343e+06	847672	1.13725e+06	1.19021e+06	1.10607e+06	585555	1.16654e+06	362672	695333	643670	780045	1
High	Master Protein	O09061	proteasome subunit beta type-1 [OS=Mus musculus]	0	135.76	36	7	208	7	240	26.4	7.81	2894	345.45	7	7	Pf00227	19170	ENSMUSG00000014769.9	Psmb1	3.34512e+07	4.00604e+07	3.65092e+07	3.49555e+07	4.09415e+07	4.43751e+07	2.93561e+07	3.88326e+07	1.56202e+07	2.13724e+07	2.21413e+07	3.12952e+07	1
High	Master Protein	O09106	histone deacetylase 1 [OS=Mus musculus]	0	191.694	31	11	421	7	482	55	5.48	5334	623.42	10	11	Pf00850	433759	ENSMUSG00000028800.15	Hdac1	4.66316e+07	4.46874e+07	4.36189e+07	4.87584e+07	4.03366e+07	3.82815e+07	4.09229e+07	4.33178e+07	1.86621e+07	2.98117e+07	2.18142e+07	2.69977e+07	1	Oxidation [P29; P347; K361]
High	Master Protein	O09111	NADH dehydrogenase [ubiquinone] 1 beta subcomplex subunit 11, mitochondrial [OS=Mus musculus]	0	37.13	34	3	70	3	151	17.4	5.22	166	46.13	3	3	Pf10183	104130	ENSMUSG00000031059.9	Ndufb11	6.15184e+06	7.41393e+06	5.93123e+06	7.75058e+06	7.26277e+06	7.92594e+06	5.39873e+06	7.18669e+06	2.53764e+06	4.73884e+06	3.92774e+06	5.5897e+06	1	Oxidation [P49]
High	Master Protein	O09114	Prostaglandin-H2 D-isomerase [OS=Mus musculus]	0	16.967	13	2	10	2	189	21.1	8.25	94	13.79	2	2	Pf00061	19215	ENSMUSG00000015090.13	Ptgds	1.80192e+06	1.32723e+06	979101	1.85037e+06	1.87126e+06	555111	1.58133e+06	1286551	418903	1.13135e+06	1.01198e+06	391487	1
High	Master Protein	O09117-1	Synaptophysin-like protein 1 [OS=Mus musculus]	0	13.203	13	2	35	2	261	28.9	8.79	262	26.48	2	2	Pf01284	19027	ENSMUSG00000020570.15	Sypl	3.32396e+06	3.44843e+06	3.00357e+06	3.24939e+06	3.59303e+06	3.67105e+06	2.91703e+06	3.34274e+06	1.28506e+06	1.98674e+06	1.94313e+06	2.58897e+06	1
High	Master Protein	O09131	Glutathione S-transferase omega-1 [OS=Mus musculus]	0	23.773	17	4	95	4	240	27.5	7.36	340	31.91	4	4		14873	ENSMUSG00000025068.7	Gsto1	5.65761e+06	7.83344e+06	5.42264e+06	6.33765e+06	7.61815e+06	7.90637e+06	4.965e+06	7593355	2.32004e+06	3.87495e+06	4.11993e+06	5.5759e+06	1
High	Master Protein	O09164	Extracellular superoxide dismutase [Cu-Zn] [OS=Mus musculus]	0	14.083	11	2	5	2	251	27.4	6.84	36	2.79	2	2	Pf00080	20657	ENSMUSG00000072941.5	Sod3	352335	600450	440707	424472	493152	387438	309202	582047	188554	259530	266699	273237	1
High	Master Protein	O09174	alpha-methylacyl-CoA racemase [OS=Mus musculus]	0	60.794	20	6	53	6	381	41.7	7.4	934	61.82	5	6	Pf02515	17117	ENSMUSG00000022244.6	Amacr	2.04815e+06	3.65589e+06	2.05481e+06	2.50827e+06	3.42682e+06	3.24418e+06	1.79742e+06	3.54384e+06	879138	1.5336e+06	1.85324e+06	2.28793e+06	1
High	Master Protein	O35074	prostacyclin synthase [OS=Mus musculus]	0	37.054	12	5	80	5	501	57	6.73	343	47.31	5	5	Pf00067	19223	ENSMUSG00000017969.13	Ptgis	1.00602e+06	1.14485e+06	1.28719e+06	1.40635e+06	1.22817e+06	1.18397e+06	882862	1.10976e+06	550718	859865	664198	834982	1	Oxidation [P324]
High	Master Protein	O35075	Down syndrome critical region protein 3 homolog [OS=Mus musculus]	0	17.511	8	2	13	2	297	32.9	7.68	106	10.37	2	2	Pf00339, Pf03643	13185	ENSMUSG00000022898.12	Dscr3	102830	197671	189022	174341	252025	251130	90241.8	191612	80871.9	106595	136296	177107	1
High	Master Protein	O35114	Lysosome membrane protein 2 [OS=Mus musculus]	0	3.812	4	2	4	2	478	54	5.1	15	2.37	2	2	Pf01130	12492	ENSMUSG00000029426.8	Scarb2	477417	569748	967965	994196	1.18731e+06	968556	418971	552286	414138	607869	642104	683066	1
High	Master Protein	O35129	Prohibitin-2 [OS=Mus musculus]	0	189.936	51	14	638	14	299	33.3	9.83	9611	820.31	14	14	Pf01145	12034	ENSMUSG00000004264.17	Phb2	1.70492e+08	2.13768e+08	1.97245e+08	2.01115e+08	2.2193e+08	2.19103e+08	1.49621e+08	2.07216e+08	8.43903e+07	1.22965e+08	1.20021e+08	1.5452e+08	1	Oxidation [P118]
High	Master Protein	O35130	Ribosomal RNA small subunit methyltransferase Nep1 [OS=Mus musculus]	0	130.945	46	10	208	10	244	27	8.91	2634	251.74	10	10	Pf03587	14791	ENSMUSG00000004268.11	Emg1	1.43777e+07	1.18736e+07	1.61858e+07	1.67594e+07	1.16874e+07	1.61793e+07	1.26175e+07	1.15097e+07	6.92499e+06	1.0247e+07	6.32058e+06	1.14103e+07	1
High	Master Protein	O35206	Collagen alpha-1(XV) chain [OS=Mus musculus]	0	60.512	5	6	133	6	1367	140.4	4.89	1320	160.43	6	6	Pf01391, Pf06482, Pf13385	12819	ENSMUSG00000028339.17	Col15a1	5.42727e+06	9.3373e+06	4.67229e+06	7.20414e+06	7.54448e+06	9.09343e+06	4.76286e+06	9.05112e+06	1.99901e+06	4.40474e+06	4.08009e+06	6.41306e+06	1
High	Master Protein	O35215	D-dopachrome decarboxylase [OS=Mus musculus]	0	62.481	49	4	77	4	118	13.1	6.54	1043	95.86	4	4	Pf01187	13202	ENSMUSG00000001666.8	Ddt	3.7738e+06	5.43213e+06	3.33251e+06	4.26425e+06	5.25635e+06	6.47619e+06	3.31181e+06	5.26564e+06	1.42579e+06	2.60724e+06	2.84266e+06	4.56728e+06	1
High	Master Protein	O35218	Cleavage and polyadenylation specificity factor subunit 2 [OS=Mus musculus]	0	70.86	14	8	94	8	782	88.3	5.11	757	131.55	8	8	Pf00753, Pf07521, Pf10996, Pf12706, Pf13299	51786	ENSMUSG00000041781.8	Cpsf2	7.5106e+06	9.07808e+06	8.79658e+06	8.78192e+06	8.7377e+06	8.29224e+06	6.59115e+06	8.79985e+06	3.76356e+06	5.36942e+06	4.72539e+06	5.84803e+06	1
High	Master Protein	O35226	26S proteasome non-ATPase regulatory subunit 4 [OS=Mus musculus]	0	142.377	28	9	250	2	376	40.7	4.79	3051	366.31	9	9	Pf02809, Pf04056, Pf13519	19185	ENSMUSG00000005625.15	Psmd4	1.70332e+07	1.82384e+07	1.70696e+07	1.81628e+07	1.80958e+07	1.96769e+07	1.4948e+07	1.76794e+07	7.30311e+06	1.1105e+07	9.7863e+06	1.3877e+07	1
High	Master Protein	O35226-2	Isoform Rpn10B of 26S proteasome non-ATPase regulatory subunit 4 [OS=Mus musculus]	0	127.223	28	8	262	1	379	41	4.79	3260	398.97	8	8	Pf02809, Pf04056, Pf13519	19185	ENSMUSG00000005625.15	Psmd4	604462	536140	530061	669327	689320	579190	530463	519707	226783	409239	372788	408469	1
High	Master Protein	O35239	Tyrosine-protein phosphatase non-receptor type 9 [OS=Mus musculus]	0	22.484	7	4	56	4	593	67.9	8.1	377	35.26	4	4	Pf00102, Pf00650, Pf03765, Pf13716	56294	ENSMUSG00000032290.7	Ptpn9	1.98272e+06	2.46881e+06	2.19427e+06	2.32982e+06	2.35293e+06	2.32056e+06	1.73999e+06	2.39314e+06	938807	1.42449e+06	1.27247e+06	1.63655e+06	1
High	Master Protein	O35245-1	polycystin-2 [OS=Mus musculus]	0.001	3.469	1	1	4	1	966	108.9	5.66	43	0	1	1	Pf00520, Pf08016	18764	ENSMUSG00000034462.9	Pkd2	288607	148323	319741	266567	370287	241995	253275	143777	136799	162984	200253	170665	1
High	Master Protein	O35286	Pre-mRNA-splicing factor ATP-dependent RNA helicase DHX15 [OS=Mus musculus]	0	514.623	49	37	1158	28	795	90.9	7.46	14071	1385.35	37	37	Pf00270, Pf00271, Pf04408, Pf07717, Pf13401	13204	ENSMUSG00000029169.11	Dhx15	1.40339e+08	1.42301e+08	1.52075e+08	1.50784e+08	1.31215e+08	1.43988e+08	1.23158e+08	1.37939e+08	6.50643e+07	9.21918e+07	7.09615e+07	1.01546e+08	1	Oxidation [K491]
High	Master Protein	O35295	Transcriptional activator protein Pur-beta [OS=Mus musculus]	0	111.923	41	11	144	11	324	33.9	5.43	2838	208.33	11	11	Pf04845	19291	ENSMUSG00000094483.2	Purb	2.32152e+07	1.40928e+07	1.55688e+07	1.50474e+07	1.55024e+07	1.4446e+07	2.03732e+07	1.36609e+07	6.661e+06	9.20026e+06	8.38379e+06	1.01879e+07	1
High	Master Protein	O35316	Sodium- and chloride-dependent taurine transporter [OS=Mus musculus]	0	19.411	4	2	7	2	621	69.8	7.23	20	5.06	2	2	Pf00209	21366	ENSMUSG00000030096.8	Slc6a6	316556	806259	706731	726202	692051	701217	277803	781548	302371	444013	374264	494527	1
High	Master Protein	O35326	Serine/arginine-rich splicing factor 5 [OS=Mus musculus]	0	84.609	25	6	205	5	269	30.9	11.56	2108	326.83	6	6	Pf00076, Pf13893, Pf14259	20384	ENSMUSG00000021134.17	Srsf5	2.40884e+07	2.53073e+07	2.85306e+07	3.06717e+07	2.72107e+07	2.6756e+07	2.11395e+07	2.45316e+07	1.22067e+07	18753208	1.47157e+07	1.88694e+07	1
High	Master Protein	O35344	Importin subunit alpha-4 [OS=Mus musculus]	0	93.175	20	7	131	5	521	57.7	4.94	1295	136.63	7	7	Pf00514, Pf01602, Pf01749, Pf13513, Pf13646	16648	ENSMUSG00000021929.8	Kpna3	5.11969e+06	8.51001e+06	1.17717e+07	1.12582e+07	8.78444e+06	5.69672e+06	4.49294e+06	8.24919e+06	5.03646e+06	6.88347e+06	4.75066e+06	4.01756e+06	1
High	Master Protein	O35381	Acidic leucine-rich nuclear phosphoprotein 32 family member A [OS=Mus musculus]	0	127.681	31	9	237	7	247	28.5	4.07	2467	319.01	8	9	Pf12799, Pf13855, Pf14580	11737	ENSMUSG00000032249.14	Anp32a	4.91209e+07	4.45894e+07	5.37086e+07	5.33696e+07	5.14096e+07	4.56642e+07	4.31074e+07	4.32228e+07	2.29789e+07	3.26311e+07	2.78026e+07	3.22043e+07	1	Oxidation [P140]
High	Master Protein	O35382	Exocyst complex component 4 [OS=Mus musculus]	0	53.711	11	7	62	7	975	110.5	6.49	618	52.98	7	7	Pf04048	20336	ENSMUSG00000029763.17	Exoc4	1.68509e+06	2.01337e+06	1.62372e+06	1.57065e+06	1.72537e+06	1.18375e+06	1.4788e+06	1.95166e+06	694698	960325	933089	834829	1
High	Master Protein	O35405	Phospholipase D3 [OS=Mus musculus]	0	13.185	4	2	10	2	488	54.4	6.52	143	12.48	2	2	Pf00614, Pf13091, Pf13918	18807	ENSMUSG00000003363.15	Pld3	2.28093e+06	2.66873e+06	2.33126e+06	2.68104e+06	2.55486e+06	2.76229e+06	2.0017e+06	2.58694e+06	997418	1.63924e+06	1.38168e+06	1.94808e+06	1
High	Master Protein	O35459	Delta(3,5)-Delta(2,4)-dienoyl-CoA isomerase, mitochondrial [OS=Mus musculus]	0	72.749	27	6	105	6	327	36.1	7.71	899	110.88	6	6	Pf00378	51798	ENSMUSG00000053898.12	Ech1	6.85149e+06	7.41442e+06	6.33756e+06	7.2516e+06	8.3653e+06	6.8758e+06	6.01273e+06	7.18718e+06	2.71149e+06	4.43376e+06	4.52399e+06	4.8491e+06	1
High	Master Protein	O35465-1	peptidyl-prolyl cis-trans isomerase FKBP8 [OS=Mus musculus]	0	93.484	17	5	126	5	402	43.5	5.16	2765	195.21	5	5	Pf00254, Pf00515, Pf07719, Pf13181, Pf13414, Pf13424, Pf13431, Pf13432, Pf14559	14232	ENSMUSG00000019428.16	Fkbp8	8.52049e+06	8.3445e+06	8.72256e+06	1.07448e+07	9.16496e+06	8.65639e+06	7.4774e+06	8.08875e+06	3.73189e+06	6.56958e+06	4.95645e+06	6.10484e+06	1
High	Master Protein	O35492	Dual specificity protein kinase CLK3 [OS=Mus musculus]	0	5.36	2	1	4	1	638	73.8	9.94	0	0	1	1	Pf00069, Pf07714	102414	ENSMUSG00000032316.8	Clk3	179886	150640	191864	110703		118201	157864	146023	82088	67685.8		83360	1
High	Master Protein	O35566	CD151 antigen [OS=Mus musculus]	0	33.708	10	2	28	2	253	28.2	7.47	193	29.55	2	2	Pf00335	12476	ENSMUSG00000025510.14	Cd151	1.18604e+07	1.49122e+07	7.78754e+06	1.42413e+07	1.53182e+07	2.32431e+07	1.04084e+07	1.44551e+07	3.33185e+06	8.70738e+06	8.28413e+06	1.6392e+07	1
High	Master Protein	O35593	26S proteasome non-ATPase regulatory subunit 14 [OS=Mus musculus]	0	100.25	38	9	153	9	310	34.6	6.52	1138	155.07	9	9	Pf01398, Pf13012, Pf14464	59029	ENSMUSG00000026914.15	Psmd14	1.38225e+07	1.44803e+07	1.34782e+07	1.6132e+07	1.67918e+07	1.71116e+07	1.21303e+07	1.40365e+07	5.76656e+06	9.86341e+06	9.08107e+06	1.20678e+07	1	Oxidation [K264; P267]
High	Master Protein	O35598	Disintegrin and metalloproteinase domain-containing protein 10 [OS=Mus musculus]	0	44.76	7	5	123	5	749	83.9	7.94	658	117.92	5	5	Pf00200, Pf01421, Pf01562, Pf13574, Pf13582, Pf13583, Pf13688	11487	ENSMUSG00000054693.14	Adam10	4.90585e+06	5.68701e+06	2.57598e+06	3.27932e+06	5.90614e+06	6.19049e+06	4.30528e+06	5.51271e+06	1.10212e+06	2.00503e+06	3.19407e+06	4.36579e+06	1
High	Master Protein	O35609	Secretory carrier-associated membrane protein 3 [OS=Mus musculus]	0	47.266	17	4	48	4	349	38.4	7.64	840	76.29	4	4	Pf04144	24045	ENSMUSG00000028049.15	Scamp3	2.6401e+06	2.56558e+06	2.27741e+06	3.09372e+06	2.51091e+06	3.28585e+06	2.31689e+06	2.48694e+06	974378	1.89156e+06	1.35791e+06	2.31732e+06	1
High	Master Protein	O35623	BET1 homolog [OS=Mus musculus]	0.004	2.564	9	1	4	1	118	13.3	9.07	0	0	1	1	Pf05739	12068	ENSMUSG00000032757.6	Bet1	489478	482927	774864	334222	331105	483482	429555	468125	331521	204350	179063	340972	1
High	Master Protein	O35638	Cohesin subunit SA-2 [OS=Mus musculus]	0	69.401	8	8	104	6	1231	141.2	5.43	272	117.24	8	8	Pf00670, Pf08514	20843	ENSMUSG00000025862.14	Stag2	5.34975e+06	4.64233e+06	4.90672e+06	5.16327e+06	4.0434e+06	4.05659e+06	4.69483e+06	4.50004e+06	2.09931e+06	3.15692e+06	2.18669e+06	2.86088e+06	1	Oxidation [P1040]
High	Master Protein	O35639	annexin A3 [OS=Mus musculus]	0	69.919	25	8	80	7	323	36.4	5.76	679	60.47	8	8	Pf00191	11745	ENSMUSG00000029484.12	Anxa3	4.78835e+06	6.69466e+06	5.92457e+06	5.66224e+06	6.02142e+06	5.60991e+06	4.20215e+06	6.48947e+06	2.53479e+06	3.46199e+06	3.25641e+06	3.95634e+06	1
High	Master Protein	O35654	DNA polymerase delta subunit 2 [OS=Mus musculus]	0	74.039	16	5	63	5	469	51.3	5.78	989	96.93	4	5	Pf04042	18972	ENSMUSG00000020471.11	Pold2	3.97007e+06	4.08453e+06	4.65099e+06	4.69478e+06	3.72613e+06	4.84743e+06	3.48405e+06	3.95935e+06	1.9899e+06	2.87047e+06	2.01511e+06	3.41861e+06	1
High	Master Protein	O35682	myeloid-associated differentiation marker [OS=Mus musculus]	0	35.928	13	3	80	3	320	35.3	8.31	1865	117.64	3	3	Pf01284	50918	ENSMUSG00000068566.12; ENSMUSG00000097829.2	Myadm	5.06519e+06	7.57229e+06	7.93613e+06	8.45285e+06	1.03842e+07	1.0603e+07	4.44511e+06	7.3402e+06	3.39542e+06	5.16822e+06	5.61585e+06	7.47766e+06	1
High	Master Protein	O35683	NADH dehydrogenase [ubiquinone] 1 alpha subcomplex subunit 1 [OS=Mus musculus]	0	8.687	14	1	6	1	70	8.1	9.48	147	7.69	1	1		54405	ENSMUSG00000016427.7	Ndufa1	1.20288e+06	1.63497e+06	1.49054e+06	1.69819e+06	1.93384e+06	2.4527e+06	1055620	1584862	637719	1.0383e+06	1.04583e+06	1729745	1
High	Master Protein	O35685	nuclear migration protein nudC [OS=Mus musculus]	0	87.531	38	11	123	11	332	38.3	5.26	822	126.19	11	11	Pf04969, Pf14050	18221	ENSMUSG00000028851.6	Nudc	1.88874e+07	1.68519e+07	1.70142e+07	1.89369e+07	1.64826e+07	1.68045e+07	1.65752e+07	1.63354e+07	7.27945e+06	1.15784e+07	8.91384e+06	1.18512e+07	1
High	Master Protein	O35730-1	E3 ubiquitin-protein ligase RING1 [OS=Mus musculus]	0	8.67	3	1	6	1	406	42.6	5.74	33	4.63	1	1	Pf00097, Pf11789, Pf13639, Pf13920, Pf13923, Pf14570, Pf14634, Pf14835, Pf15227	19763	ENSMUSG00000024325.8	Ring1	728984	746524	643402	786133	680583	851884	639741	723643	275276	480656	368062	600783	1
High	Master Protein	O35744	Chitinase-like protein 3 [OS=Mus musculus]	0	27.951	10	3	24	3	398	44.4	5.69	220	26.58	3	3	Pf00704	12655	ENSMUSG00000040809.10	Chi3l3; Chil3	468291	1.35093e+06	481456	509171	550222	684640	410962	1.30952e+06	205988	311317	297563	482836	1
High	Master Protein	O35841	Apoptosis inhibitor 5 [OS=Mus musculus]	0	117.712	21	10	206	1	504	56.8	5.92	2533	237.05	10	9	Pf05918, Pf13646	11800	ENSMUSG00000027193.12	Api5	1.09772e+06	1.17618e+06	806138	1.43957e+06	1.3364e+06	1.04911e+06	963332	1.14013e+06	344902	880182	722730	739877	1
High	Master Protein	O35855	Branched-chain-amino-acid aminotransferase, mitochondrial [OS=Mus musculus]	0	79.188	24	7	125	7	393	44.1	8.29	1548	171.57	7	7	Pf01063	12036	ENSMUSG00000030826.19	Bcat2	9.94507e+06	1.16128e+07	1.03679e+07	1.07143e+07	1.2296e+07	1.38311e+07	8.72759e+06	1.12568e+07	4.43586e+06	6.55092e+06	6.64976e+06	9.75429e+06	1
High	Master Protein	O35857	Mitochondrial import inner membrane translocase subunit TIM44 [OS=Mus musculus]	0	83.33	18	6	92	6	452	51.1	8.13	973	130.08	6	6	Pf04280	21856	ENSMUSG00000002949.15	Timm44	5.33152e+06	7.16766e+06	6.51919e+06	6.75726e+06	6.95786e+06	7.33446e+06	4.67883e+06	6.94798e+06	2.7892e+06	4.13151e+06	3.76284e+06	5.17257e+06	1
High	Master Protein	O35864	COP9 signalosome complex subunit 5 [OS=Mus musculus]	0	56.425	21	6	125	6	334	37.5	6.54	935	152.96	6	6	Pf01398, Pf14464	26754	ENSMUSG00000025917.9	Cops5	7.85343e+06	9.11617e+06	7.86448e+06	7.51767e+06	8.20609e+06	8.64754e+06	6.892e+06	8.83676e+06	3.36477e+06	4.59644e+06	4.43789e+06	6.0986e+06	1
High	Master Protein	O35900	U6 snRNA-associated Sm-like protein LSm2 [OS=Mus musculus]	0	99.046	73	4	138	4	95	10.8	6.52	1258	213.8	4	4	Pf01423	27756	ENSMUSG00000007050.17	Lsm2	6.67414e+06	5.87164e+06	6.10015e+06	7.02992e+06	7.70276e+06	1.07062e+07	5.85709e+06	5.69168e+06	2.60991e+06	4.29822e+06	4.16569e+06	7.55044e+06	1	Oxidation [P52; K58]
Medium	Master Protein	O35929	GTP-binding protein REM 1 [OS=Mus musculus]	0.022	1.529	3	1	2	1	297	32.9	9.1	0	0	1	1	Pf00071, Pf07728, Pf08477, Pf13479	19700	ENSMUSG00000000359.3	Rem1	325414	500218	360516	304943	370522	518122	285577	484886	154245	186448	200380	365401	1
Medium	Master Protein	O35930	Platelet glycoprotein Ib alpha chain [OS=Mus musculus]	0.027	1.385	1	1	27	1	734	80	5.87	0	3.29	1	1	Pf12799, Pf13855	14723	ENSMUSG00000050675.7	Gp1ba	1.36375e+06	4.20638e+06	2.74544e+06	2.12907e+06	2.296e+06	2.48419e+06	1.1968e+06	4077456	1.17462e+06	1.30175e+06	1.24169e+06	1.75195e+06	1	Oxidation [P703]
High	Master Protein	O35945	Aldehyde dehydrogenase, cytosolic 1 [OS=Mus musculus]	0	18.193	9	4	37	3	501	54.6	7.71	136	25.29	4	4	Pf00171, Pf05893, Pf07368	26358	ENSMUSG00000024747.3	Aldh1a7	928387	436064	396890	911735	1.41884e+06	1.54775e+06	814733	422699	169807	557451	767315	1.09154e+06	1
High	Master Protein	O54692	Centromere/kinetochore protein zw10 homolog [OS=Mus musculus]	0	18.067	3	2	20	2	779	88	5.92	154	18.73	2	2	Pf06248	26951	ENSMUSG00000032264.9	Zw10	818344	978578	727059	1.10444e+06	1.22738e+06	710775	718161	948586	311068	675274	663774	501268	1
High	Master Protein	O54724	caveolae-associated protein 1 [OS=Mus musculus]	0	110.207	33	8	101	8	392	43.9	5.52	1743	148.53	7	8	Pf15237	19285	ENSMUSG00000004044.9	Ptrf; Cavin1	5.66252e+06	5.7682e+06	4.76232e+06	5.84566e+06	5.67243e+06	6.66805e+06	4.96931e+06	5.59141e+06	2.03753e+06	3.57414e+06	3.06768e+06	4.70258e+06	1	Oxidation [P12]; Acetyl [N-Term]
High	Master Protein	O54726	interferon regulatory factor-3 [OS=Mus musculus]	0	15.2	24	1	2	1	83	9.4	7.28	31	3.4	1	1	Pf10401	54131		Irf3	435134	500666	266127	504520	340991	430552	381865	485321	113861	308473	184410	303643	1
High	Master Protein	O54734	Dolichyl-diphosphooligosaccharide--protein glycosyltransferase 48 kDa subunit [OS=Mus musculus]	0	154.742	38	13	610	13	441	49	5.83	8617	804.16	13	13	Pf03345	13200	ENSMUSG00000028757.4	Ddost	9.48374e+07	1.06922e+08	9.96276e+07	1.1007e+08	1.02169e+08	1.12675e+08	8.32273e+07	1.03645e+08	42625084	6.72986e+07	55253213	7.94633e+07	1
High	Master Protein	O54749	Cytochrome P450 2J5 [OS=Mus musculus]	0	19.156	8	4	32	4	501	57.7	8.73	170	22.22	4	4	Pf00067	13109	ENSMUSG00000052520.7	Cyp2j5	2.00593e+06	3.27781e+06	1.63587e+06	1.91361e+06	2.38986e+06	3.34999e+06	1.76036e+06	3.17735e+06	699898	1.17001e+06	1.29245e+06	2.36255e+06	1
High	Master Protein	O54774	AP-3 complex subunit delta-1 [OS=Mus musculus]	0	100.466	10	10	168	10	1199	135	7.37	1094	187.54	10	10	Pf01602, Pf06375	11776	ENSMUSG00000020198.8	Ap3d1	9.54892e+06	1.20783e+07	9.48092e+06	1.11156e+07	9.62998e+06	9.88495e+06	8.37994e+06	1.17081e+07	4.05636e+06	6.79628e+06	5.20793e+06	6.97127e+06	1
High	Master Protein	O54782	Epididymis-specific alpha-mannosidase [OS=Mus musculus]	0.004	2.621	1	1	2	1	1018	115.5	7.39	0	1.7	1	1	Pf01074, Pf07748, Pf09261	17160	ENSMUSG00000029119.9	Man2b2	119143		78456.4		158548	177549	104557		33567.1		85743.5	125215	1
High	Master Protein	O54784	Death-associated protein kinase 3 [OS=Mus musculus]	0	10.057	3	1	2	1	448	51.4	8.7	52	2.42	1	1	Pf00069, Pf06293, Pf07714	13144	ENSMUSG00000034974.13	Dapk3	262742	386519	228005	286457	286072	322817	230577	374672	97550.6	175145	154709	227664	1
Medium	Master Protein	O54797	steroid 21-hydroxylase [OS=Mus musculus]	0.039	1.037	3	1	1	1	490	55.5	8.57	0		1		Pf00067	13079		Cyp21a1	570789	502047	284675	791479	1.11895e+06	850663	500912	486660	121796	483925	605133	599922	1
High	Master Protein	O54825	Bystin [OS=Mus musculus]	0	81.728	31	11	161	11	436	49.8	7.78	1203	139.71	11	11	Pf05291	53414	ENSMUSG00000023988.8	Bysl	1.16294e+07	9.82955e+06	1.31067e+07	1.47353e+07	1.08404e+07	1.22808e+07	1.02057e+07	9.52828e+06	5.60762e+06	9.00943e+06	5.86254e+06	8.66093e+06	1
High	Master Protein	O54833	casein kinase II subunit alpha' [OS=Mus musculus]	0	101.247	35	11	159	10	350	41.2	8.56	707	137.19	10	11	Pf00069, Pf01636, Pf07714	13000	ENSMUSG00000046707.9	Csnk2a2	9.40019e+06	1.08884e+07	1.07999e+07	1.1201e+07	1.09331e+07	1.154e+07	8.24942e+06	1.05546e+07	4.62069e+06	6.84848e+06	5.91266e+06	8.13847e+06	1
High	Master Protein	O54865	guanylate cyclase soluble subunit beta-1 [OS=Mus musculus]	0	9.57	4	2	6	2	620	70.6	5.31	29	5.91	2	2	Pf00211, Pf07700, Pf07701	54195	ENSMUSG00000028005.13	Gucy1b3	272367	317512	236918	199973	299961	307115	239024	307780	101364	122267	162221	216590	1
High	Master Protein	O54941	SWI/SNF-related matrix-associated actin-dependent regulator of chromatin subfamily E member 1 [OS=Mus musculus]	0	44.32	16	5	35	5	411	46.6	4.88	219	36.13	5	5	Pf00505	57376	ENSMUSG00000037935.16	Smarce1	3.32659e+06	2.32944e+06	1.50127e+06	2.32888e+06	2.2813e+06	2.50078e+06	2.91935e+06	2.25805e+06	642309	1.42392e+06	1.23374e+06	1.76365e+06	1
High	Master Protein	O54950	5'-AMP-activated protein kinase subunit gamma-1 [OS=Mus musculus]	0	52.39	21	6	58	6	330	37.5	7.14	343	60.52	6	6	Pf00571	19082	ENSMUSG00000067713.6	Prkag1	1.12735e+07	1.28989e+07	1.36059e+07	1.31075e+07	1.2115e+07	1.42958e+07	9.89343e+06	1.25035e+07	5.8212e+06	8.01417e+06	6.55187e+06	1.0082e+07	1
High	Master Protein	O54983	Ketimine reductase mu-crystallin [OS=Mus musculus]	0	15.2	5	1	6	1	313	33.5	5.67	130	13.49	1	1	Pf01488, Pf02423, Pf03446	12971	ENSMUSG00000030905.5	Crym	201606	406640			219868	448401	176925	394177			118905	316231	1
High	Master Protein	O54984	ATPase ASNA1 [OS=Mus musculus]	0	95.446	33	9	94	9	348	38.8	4.91	690	118.96	9	9	Pf02374	56495	ENSMUSG00000052456.9	Asna1	1.4778e+07	1.46619e+07	1.68427e+07	1.689e+07	1.5146e+07	1.69539e+07	1.29689e+07	1.42125e+07	7.20603e+06	1.03268e+07	8.19101e+06	1.19566e+07	1
High	Master Protein	O54988-1	STE20-like serine/threonine-protein kinase [OS=Mus musculus]	0	107.376	11	10	109	10	1233	141.4	5.14	1146	93.69	10	10	Pf00069, Pf07714, Pf12474, Pf14531	20874	ENSMUSG00000025060.14	Slk	5.60612e+06	6.1022e+06	5.28663e+06	5.76697e+06	5.75574e+06	5.57008e+06	4.91981e+06	5.91517e+06	2.26185e+06	3.52603e+06	3.11273e+06	3.92825e+06	1
Medium	Master Protein	O55013	Trafficking protein particle complex subunit 3 [OS=Mus musculus]	0.014	1.822	6	1	4	1	180	20.3	4.96	46	5.07	1	1	Pf04051	27096	ENSMUSG00000028847.8	Trappc3	826230	911128	841045	830841	869440	1.1162e+06	725083	883203	359836	507991	470197	787192	1
High	Master Protein	O55029	Coatomer subunit beta' [OS=Mus musculus]	0	457.777	55	35	1026	35	905	102.4	5.3	11570	1371.25	35	35	Pf00400, Pf04053	50797	ENSMUSG00000032458.6	Copb2	1.18178e+08	1.41419e+08	1.2302e+08	1.47192e+08	1.44871e+08	1.28072e+08	1.0371e+08	1.37085e+08	5.26333e+07	8.99956e+07	7.83469e+07	9.03214e+07	1	Oxidation [P857]
High	Master Protein	O55033	Cytoplasmic protein NCK2 [OS=Mus musculus]	0	32.565	24	7	47	5	380	42.9	6.95	132	17.12	7	7	Pf00017, Pf00018, Pf07653, Pf14604	17974	ENSMUSG00000066877.11	Nck2	1.99519e+06	2.46337e+06	1.84011e+06	1.86532e+06	1.58968e+06	1.79447e+06	1.75094e+06	2.38787e+06	787280	1.14049e+06	859705	1.26553e+06	1
High	Master Protein	O55060	Thiopurine S-methyltransferase [OS=Mus musculus]	0	31.988	17	4	40	4	240	27.6	6.44	365	32.84	4	4	Pf05724	22017		Tpmt	5.02976e+06	4.65347e+06	2.20368e+06	4.21513e+06	3.91171e+06	3.50021e+06	4.41402e+06	4.51085e+06	942833	2.57721e+06	2.11547e+06	2.46849e+06	1
Medium	Master Protein	O55123	Stromelysin-2 [OS=Mus musculus]	0.014	1.809	3	1	6	1	476	53.9	6.37	0	0	1	1	Pf00045, Pf00413, Pf01471, Pf13688	17384	ENSMUSG00000047562.3	Mmp10	748306	708871	630514	1.13833e+06	1.18965e+06	1.31025e+06	656698	687145	269762	695997	643370	924042	1
High	Master Protein	O55125	Protein NipSnap homolog 1 [OS=Mus musculus]	0	96.682	33	8	204	8	284	33.3	9.44	2109	271.22	8	8	Pf07978	18082	ENSMUSG00000034285.15	Nipsnap1	1.49692e+07	2.36923e+07	1.53143e+07	2.0804e+07	2.37818e+07	2.18172e+07	1.31367e+07	2.29661e+07	6.55214e+06	1.27199e+07	1.28613e+07	1.53864e+07	1	Oxidation [K141]
High	Master Protein	O55142	60S ribosomal protein L35a [OS=Mus musculus]	0	61.812	49	11	400	11	110	12.5	10.89	2307	354.18	11	11	Pf01247	100043423; 57808; 100042363; 100302576; 100040169; 100046034; 100048620	ENSMUSG00000060636.13	Rpl35a-ps4; Rpl35a; Rpl35a-ps2; Gm10243; Rpl35a-ps5; LOC100862595; Gm14279; LOC100048620	7.73298e+07	6.87722e+07	7.21944e+07	7.28322e+07	7.58086e+07	8.53007e+07	6.7863e+07	6.66643e+07	3.08879e+07	4.45309e+07	4.09977e+07	6.01576e+07	1
High	Master Protein	O55143-1	Sarcoplasmic/endoplasmic reticulum calcium ATPase 2 [OS=Mus musculus]	0	605.374	36	35	1328	35	1044	114.8	5.34	17445	1905.22	35	35	Pf00122, Pf00689, Pf00690, Pf00702, Pf08282, Pf12710, Pf13246	11938	ENSMUSG00000029467.15	Atp2a2	1.52845e+08	1.70424e+08	1.61289e+08	1.69492e+08	1.68826e+08	1.60837e+08	1.34133e+08	1.65201e+08	6.90066e+07	1.0363e+08	9.13017e+07	1.13429e+08	1
High	Master Protein	O55201	Transcription elongation factor Spt5 [OS=Mus musculus]	0	287.605	29	22	415	22	1082	120.6	5.05	4900	558.01	22	22	Pf00467, Pf03439, Pf04731, Pf07223, Pf11029, Pf11942, Pf12815	20924	ENSMUSG00000003435.9	Supt5; Supt5h	4.63135e+07	5.78882e+07	3.34763e+07	4.35709e+07	4.66486e+07	5.64325e+07	4.06437e+07	5.6114e+07	1.43227e+07	2.664e+07	2.52278e+07	3.97985e+07	1	Oxidation [P662; P752; P763]
High	Master Protein	O55222	Integrin-linked protein kinase [OS=Mus musculus]	0	124.529	39	16	376	16	452	51.3	8.07	2203	333.81	16	16	Pf00023, Pf00069, Pf07714, Pf12796, Pf13606, Pf13637, Pf13857	16202	ENSMUSG00000030890.16	Ilk	2.67287e+07	3.18662e+07	2.48741e+07	2.50079e+07	2.74677e+07	2.90194e+07	2.34565e+07	30889536	1.06422e+07	1.52903e+07	1.48547e+07	2.04657e+07	1
High	Master Protein	O55234	proteasome subunit beta type-5 [OS=Mus musculus]	0	145.986	44	12	348	12	264	28.5	7.02	5112	465.05	12	12	Pf00227	19173	ENSMUSG00000022193.6	Psmb5	4.81125e+07	5.83079e+07	4.88e+07	5.37393e+07	6.33562e+07	6.63848e+07	4.22225e+07	5.65208e+07	2.08788e+07	3.28572e+07	3.42633e+07	4.68173e+07	1
High	Master Protein	O70152	Dolichol-phosphate mannosyltransferase subunit 1 [OS=Mus musculus]	0	48.3	19	5	89	5	260	29.2	9.51	1246	85.58	5	5	Pf00535, Pf10111, Pf13641, Pf13704, Pf13712	13480	ENSMUSG00000093752.1; ENSMUSG00000078919.10	Dpm1	2.39888e+06	3.15122e+06	1.789e+06	3.25858e+06	3.48788e+06	3.54335e+06	2.10521e+06	3.05464e+06	765415	1.99236e+06	1.88626e+06	2.49892e+06	1
High	Master Protein	O70194	Eukaryotic translation initiation factor 3 subunit D [OS=Mus musculus]	0	291.664	42	20	461	20	548	63.9	6.05	5190	663.67	19	20	Pf05091	55944	ENSMUSG00000016554.8	Eif3d	5.69855e+07	5.90238e+07	6.67335e+07	6.76774e+07	6.29864e+07	6.50785e+07	5.00093e+07	5.72148e+07	2.85515e+07	4.13792e+07	3.40633e+07	4.5896e+07	1	Oxidation [K171]
High	Master Protein	O70250	phosphoglycerate mutase 2 [OS=Mus musculus]	0	69.705	17	5	231	1	253	28.8	8.5	2665	328.61	5	5	Pf00300	56012	ENSMUSG00000020475.3	Pgam2	171297	288157	185167	313902	451648	337915	150327	279325	79222.6	191925	244253	238312	1
High	Master Protein	O70251	Elongation factor 1-beta [OS=Mus musculus]	0	70.048	44	7	138	7	225	24.7	4.69	1939	185.04	6	7	Pf00736, Pf14497	55949	ENSMUSG00000025967.16	Eef1b2	3.60612e+07	3.26573e+07	4.18885e+07	4.41459e+07	3.45459e+07	3.23761e+07	3.16466e+07	3.16564e+07	1.79217e+07	2.69916e+07	1.86826e+07	2.2833e+07	1	Oxidation [K157]
High	Master Protein	O70274	Protein tyrosine phosphatase type IVA 2 [OS=Mus musculus]	0	25.226	25	3	31	3	167	19.1	8.37	15	22.32	2	3	Pf00102, Pf00782	19244	ENSMUSG00000028788.14	Ptp4a2	2.135e+06	2.42086e+06	2.60916e+06	2.59422e+06	2.39898e+06	2.98421e+06	1.87363e+06	2.34667e+06	1.11631e+06	1.58615e+06	1.29738e+06	2.10459e+06	1
High	Master Protein	O70286	Cyclic AMP specific phosphodiesterase PDE4D5A [OS=Mus musculus]	0.004	2.586	4	1	65	1	213	23.9	9.67	50	25.22	1	1		238871		Pde4d	2.83281e+06	4.61445e+06	4.9037e+06	4.93469e+06	4.52426e+06	4.32552e+06	2.48601e+06	4.47302e+06	2.09802e+06	3.01716e+06	2.44674e+06	3.05054e+06	1	Oxidation [P13]
High	Master Protein	O70305-1	Ataxin-2 [OS=Mus musculus]	0	7.714	1	1	6	1	1285	136.4	9.55	19	5.21	1	1	Pf06741, Pf07145, Pf09770, Pf14438	20239		Atxn2	287523	273119	355123	410701	352165	384264	252324	264748	151937	251110	190452	270999	1
High	Master Protein	O70310	glycylpeptide N-tetradecanoyltransferase 1 [OS=Mus musculus]	0	149.553	28	11	181	8	496	56.9	8	1878	265.56	11	10	Pf01233, Pf02799	18107	ENSMUSG00000020936.8	Nmt1	2.05039e+07	2.15201e+07	1.88345e+07	2.21699e+07	2.01437e+07	2.38246e+07	1.79938e+07	2.08606e+07	8.05823e+06	1.35551e+07	1.08938e+07	1.68021e+07	1
High	Master Protein	O70311	Glycylpeptide N-tetradecanoyltransferase 2 [OS=Mus musculus]	0	35.717	10	4	54	1	529	60.4	7.8	482	57.24	4	4	Pf01233, Pf02799	18108	ENSMUSG00000026643.16	Nmt2	246088	283374	273265	447495	384885	360718	215962	274689	116915	273607	208147	254393	1
High	Master Protein	O70318	band 4.1-like protein 2 [OS=Mus musculus]	0	188.081	21	19	288	16	988	109.9	5.43	3071	318.79	19	19	Pf00373, Pf04382, Pf05902, Pf08736, Pf09379, Pf09380	13822	ENSMUSG00000019978.16	Epb4.1l2; Epb41l2	2.9953e+07	3.13112e+07	2.82169e+07	2.85613e+07	3.06437e+07	3.05464e+07	2.62862e+07	3.03515e+07	1.20724e+07	1.74629e+07	1.65723e+07	2.15426e+07	1
High	Master Protein	O70325-1	Phospholipid hydroperoxide glutathione peroxidase, mitochondrial [OS=Mus musculus]	0	85.729	41	8	126	8	197	22.2	8.46	964	129.43	8	8	Pf00255	625249	ENSMUSG00000075706.10	Gpx4	7.44032e+06	9.622e+06	6.18309e+06	8.30583e+06	9.25005e+06	1.06902e+07	6.52947e+06	9.32709e+06	2.6454e+06	5.07833e+06	5.00247e+06	7.53918e+06	1
High	Master Protein	O70378	ER membrane protein complex subunit 8 [OS=Mus musculus]	0	13.476	9	2	32	2	207	23.3	6.15	333	36.48	2	2	Pf03665	18117	ENSMUSG00000031819.13	Emc8	1.93828e+06	2.19051e+06	2.38837e+06	2.47049e+06	2.31686e+06	2.52398e+06	1.70099e+06	2.12337e+06	1.02185e+06	1.5105e+06	1.25297e+06	1.78001e+06	1
High	Master Protein	O70422	General transcription factor IIH subunit 4 [OS=Mus musculus]	0	10.635	6	3	38	3	463	52.2	9.04	214	18.83	3	3	Pf03849, Pf13625	14885	ENSMUSG00000001524.14	Gtf2h4	993181	939931	1.07012e+06	964983	886611	970628	871595	911123	457845	590008	479483	684527	1
High	Master Protein	O70423-1	Membrane primary amine oxidase [OS=Mus musculus]	0	8.156	2	1	4	1	765	84.5	6.42	32	4.97	1	1	Pf01179, Pf02727, Pf02728	11754	ENSMUSG00000019326.14	Aoc3	316182	435201	368144	339640	380093	435364	277474	421862	157508	207662	205556	307037	1
High	Master Protein	O70433	Four and a half LIM domains protein 2 [OS=Mus musculus]	0	39.503	21	5	62	5	279	32.1	7.3	547	68.24	5	5	Pf00412	14200	ENSMUSG00000008136.14	Fhl2	1.54922e+06	1.43782e+06	1.63429e+06	1.98373e+06	2.44015e+06	2.69058e+06	1.35956e+06	1.39376e+06	699221	1.21289e+06	1.31964e+06	1.89751e+06	1
High	Master Protein	O70475	UDP-glucose 6-dehydrogenase [OS=Mus musculus]	0	226.045	44	18	288	18	493	54.8	7.56	3381	383.83	18	18	Pf00984, Pf03720, Pf03721	22235	ENSMUSG00000029201.14	Ugdh	3.37012e+07	4.00662e+07	2.95205e+07	3.40526e+07	3.9249e+07	4.29905e+07	2.95755e+07	3.88382e+07	1.26302e+07	2.08204e+07	2.1226e+07	3.03186e+07	1	Oxidation [P435]
High	Master Protein	O70481	E3 ubiquitin-protein ligase UBR1 [OS=Mus musculus]	0	5.293	1	2	4	2	1757	200.1	6.05	0	1.6	2	2	Pf02207, Pf02617	22222	ENSMUSG00000027272.5	Ubr1	536920	1.28417e+06	949377	1.00694e+06	551382	553599	471190	1.24481e+06	406185	615664	298190	390421	1
High	Master Protein	O70503-1	Very-long-chain 3-oxoacyl-CoA reductase [OS=Mus musculus]	0	156.211	36	9	213	9	312	34.7	9.52	2830	313.29	9	9	Pf00106, Pf02719, Pf08659, Pf13460	56348	ENSMUSG00000027195.10	Hsd17b12	2.42967e+07	2.93644e+07	3.00397e+07	3.14855e+07	3.04419e+07	3.53802e+07	2.13223e+07	2.84644e+07	1.28523e+07	1.92508e+07	1.64631e+07	2.49516e+07	1
Medium	Master Protein	O70546-1	Lysine-specific demethylase 6A [OS=Mus musculus]	0.012	1.867	1	1	2	1	1401	154.3	7.39	0	0	1	1	Pf00515, Pf02373, Pf05109, Pf13414, Pf13424, Pf13431, Pf13432	22289	ENSMUSG00000037369.16	Kdm6a	85540.8	180784	236628	173639	276142	161780	75068.9	175243	101240	106166	149339	114094	1
High	Master Protein	O70551	SRSF protein kinase 1 [OS=Mus musculus]	0	77.32	12	6	82	3	648	73	6.19	694	81.6	6	6	Pf00069, Pf07714	20815	ENSMUSG00000004865.15	Srpk1	5.22663e+06	5.1813e+06	6.24904e+06	6.36467e+06	5.52998e+06	6.59498e+06	4.58678e+06	5.02249e+06	2.67362e+06	3.89147e+06	2.99064e+06	4.65105e+06	1
High	Master Protein	O70569	Ribosomal protein S14 [OS=Mus musculus]	0	172.375	42	9	541	9	151	16.3	10.13	7236	948.82	9	9	Pf00411	20044		Rps14	1.09666e+08	1.20603e+08	1.29311e+08	1.23967e+08	1.25819e+08	1.39341e+08	9.62403e+07	1.16906e+08	5.53248e+07	7.57959e+07	6.80432e+07	9.82687e+07	1
High	Master Protein	O70577-1	solute carrier family 22 member 2 [OS=Mus musculus]	0	13.678	3	1	6	1	553	61.8	7.84	129	7.3	1	1	Pf00083, Pf07690, Pf13347	20518	ENSMUSG00000040966.9	Slc22a2	151581	201964	102256	188795	197016	284789	133024	195774	43749.6	115433	106547	200845	1
High	Master Protein	O70579	peroxisomal membrane protein PMP34 [OS=Mus musculus]	0	7.208	3	1	2	1	307	34.4	10.11	0	2.17	1	1	Pf00153	20524	ENSMUSG00000022404.7	Slc25a17	122701	365132	234124		155021		107680	353941	100169		83835.9		1
High	Master Protein	O70591	Prefoldin subunit 2 [OS=Mus musculus]	0	15.2	8	1	4	1	154	16.5	6.58	79	5.57	1	1	Pf01920	18637	ENSMUSG00000006412.10	Pfdn2	362368	403100	287737	353511	517290	471808	318007	390745	123107	216143	279753	332738	1
High	Master Protein	O88207	Collagen alpha-1(V) chain [OS=Mus musculus]	0	94.57	5	7	182	7	1838	183.6	4.98	1865	215.77	7	7	Pf01410, Pf02210, Pf13385	12831	ENSMUSG00000026837.15	Col5a1	7.49528e+06	1.3643e+07	7.48658e+06	1.34019e+07	1.03749e+07	1.811e+07	6.5777e+06	1.32249e+07	3.20309e+06	8.19415e+06	5.61078e+06	1.2772e+07	1
High	Master Protein	O88271	Craniofacial development protein 1 [OS=Mus musculus]	0	5.19	3	1	8	1	295	32.9	4.86	88	3.87	1	1	Pf07572	23837	ENSMUSG00000031954.6	Cfdp1	498516	466609	524507	584377	404089	495610	437488	452308	224407	357298	218533	349525	1
High	Master Protein	O88325	alpha-N-acetylglucosaminidase [OS=Mus musculus]	0.003	2.726	1	1	10	1	739	82.5	6.61	18	0	1	1	Pf05089, Pf12971, Pf12972	27419	ENSMUSG00000001751.9	Naglu	396836	454645	255678	416402	466808	447172	348255	440710	109390	254595	252452	315364	1
High	Master Protein	O88413	Tubby-related protein 3 [OS=Mus musculus]	0	10.89	5	2	34	2	460	51.2	6.24	86	17.14	2	1	Pf01167	22158	ENSMUSG00000001521.12	Tulp3	2.47086e+06	3.09706e+06	2.3009e+06	2.73246e+06	2.94393e+06	2.69357e+06	2.16837e+06	3.00214e+06	984427	1.67067e+06	1.59209e+06	1.89962e+06	1
High	Master Protein	O88428	bifunctional 3'-phosphoadenosine 5'-phosphosulfate synthase 2 [OS=Mus musculus]	0	74.388	16	8	100	7	621	70.3	7.58	1100	122.19	8	8	Pf01583, Pf01747, Pf13207, Pf13238, Pf13671, Pf14306	23972	ENSMUSG00000024899.6	Papss2	1.97257e+06	4.82607e+06	2.39742e+06	3.1336e+06	3.86512e+06	4.47307e+06	1.73109e+06	4.67815e+06	1.02572e+06	1915939	2.09027e+06	3.15459e+06	1
Medium	Master Protein	O88445	Aurora kinase C [OS=Mus musculus]	0.024	1.466	5	1	3	1	282	32.9	8.94	0	0	1	1	Pf00069, Pf07714, Pf14531	20871; 637541		Aurkc; Gm7207	168348	180638	206090	212939	234362	264681	147739	175102	88174.2	130195	126744	186664	1	Oxidation [P236]
High	Master Protein	O88451	Retinol dehydrogenase 7 [OS=Mus musculus]	0	20.655	10	3	13	3	316	35.6	8.09	40	4.77	3	3	Pf00106, Pf08643	54150	ENSMUSG00000040134.8	Rdh7	305132	747507	122755	260836	685600	678966	267778	724597	52520.1	159480	370776	478834	1
High	Master Protein	O88456	Calpain small subunit 1 [OS=Mus musculus]	0	17.93	8	2	30	2	269	28.4	5.63	468	23.18	2	2	Pf13833	12336		Capns1	1.80093e+06	2.48281e+06	1.45162e+06	2.08791e+06	2.73191e+06	2.89302e+06	1.58046e+06	2.40672e+06	621067	1.27659e+06	1.47743e+06	2.04028e+06	1
High	Master Protein	O88477	Insulin-like growth factor 2 mRNA-binding protein 1 [OS=Mus musculus]	0	220.826	38	20	465	19	577	63.4	9.2	5743	554.79	20	20	Pf00013, Pf00076, Pf13014, Pf13893, Pf14259	140486	ENSMUSG00000013415.9	Igf2bp1	4.88886e+07	4.46108e+07	6.26057e+07	5.9107e+07	4.45799e+07	5.07705e+07	4.29037e+07	4.32435e+07	2.67855e+07	3.61391e+07	2.4109e+07	3.58055e+07	1
High	Master Protein	O88491	Histone-lysine N-methyltransferase, H3 lysine-36 and H4 lysine-20 specific [OS=Mus musculus]	0	6.735	0	1	2	1	2588	283.9	7.9	31	2.23	1	1	Pf00628, Pf00855, Pf00856	18193		Nsd1	771014	555892	772471	721767	831412	886907	676626	538854	330497	441301	449631	625483	1
High	Master Protein	O88508-1	DNA (cytosine-5)-methyltransferase 3A [OS=Mus musculus]	0	125.179	19	15	150	15	908	101.6	6.65	998	129.86	15	15	Pf00145, Pf00855	13435	ENSMUSG00000020661.15	Dnmt3a	9.82261e+06	7.30896e+06	1.27202e+07	9.09128e+06	8.45667e+06	1.76643e+07	8.62012e+06	7.08495e+06	5.44227e+06	5.55857e+06	4.5734e+06	1.24576e+07	1
High	Master Protein	O88543	COP9 signalosome complex subunit 3 [OS=Mus musculus]	0	111.178	34	10	109	10	423	47.8	6.65	1393	175.57	10	10	Pf01399	26572	ENSMUSG00000019373.11	Cops3	1.26941e+07	1.20914e+07	1.04e+07	1.24075e+07	1.21487e+07	1.17859e+07	1.114e+07	1.17208e+07	4.44956e+06	7.58616e+06	6.57009e+06	8.31193e+06	1
High	Master Protein	O88544	COP9 signalosome complex subunit 4 [OS=Mus musculus]	0	141.935	41	13	228	13	406	46.3	5.83	3198	321.5	13	13	Pf01399	26891	ENSMUSG00000035297.14	Cops4	1.31665e+07	1.58097e+07	1.30968e+07	1.70196e+07	1.74291e+07	1.70118e+07	1.15546e+07	1.53252e+07	5.60339e+06	1.04061e+07	9425718	1.19974e+07	1
High	Master Protein	O88545	COP9 signalosome complex subunit 6 [OS=Mus musculus]	0	151.127	47	10	185	10	324	35.9	5.73	1769	253.9	10	10	Pf01398, Pf13012	26893	ENSMUSG00000019494.14	Cops6	1.48019e+07	1.8743e+07	1.62207e+07	1.68042e+07	1.5679e+07	1.70131e+07	1.29898e+07	1.81685e+07	6.93995e+06	1.02744e+07	8.47927e+06	1.19983e+07	1
High	Master Protein	O88552	Claudin-2 [OS=Mus musculus]	0	12.54	7	1	4	1	230	24.5	7.93	0	4.88	1	1	Pf00822	12738	ENSMUSG00000047230.6	Cldn2	212364	216315	183780	298940	317880	435326	186366	209685	78629.4	182777	171911	307010	1
High	Master Protein	O88554	Poly [ADP-ribose] polymerase 2 [OS=Mus musculus]	0	35.526	7	4	30	4	559	63.4	8.43	178	30.78	4	4	Pf00644, Pf02877, Pf05406	11546	ENSMUSG00000036023.5	Parp2	1.24828e+06	960015	1.30692e+06	1.33812e+06	969384	2.19113e+06	1.09547e+06	930591	559157	818148	524247	1.54528e+06	1
High	Master Protein	O88569	heterogeneous nuclear ribonucleoproteins A2/B1 [OS=Mus musculus]	0	645.304	74	27	2307	25	353	37.4	8.95	34896	3530.14	25	27	Pf00076, Pf13893, Pf14259	53379	ENSMUSG00000004980.16	Hnrnpa2b1	1.26769e+09	1.1058e+09	1.35782e+09	1.4086e+09	1.21685e+09	1.54421e+09	1.1125e+09	1.0719e+09	5.80934e+08	8.61242e+08	6.58078e+08	1.08904e+09	1	Oxidation [K46; P83; P330]
High	Master Protein	O88587-1	Catechol O-methyltransferase [OS=Mus musculus]	0	22.084	15	3	53	3	265	29.5	5.83	178	39.78	3	3	Pf01596, Pf12847, Pf13578, Pf13659	12846	ENSMUSG00000000326.12; ENSMUSG00000098892.8	Comt	4.4381e+06	6.15061e+06	4.48081e+06	5.17502e+06	6.08476e+06	5.68553e+06	3.89478e+06	5.96209e+06	1.91709e+06	3.1641e+06	3.29067e+06	4009667	1
Medium	Master Protein	O88630	Golgi SNAP receptor complex member 1 [OS=Mus musculus]	0.012	1.882	3	1	4	1	250	28.5	9.29	29	1.75	1	1	Pf12352	53334	ENSMUSG00000010392.8	Gosr1	556550		489061		426882	407498	488416		209242		230859	287385	1
High	Master Protein	O88653	ragulator complex protein LAMTOR3 [OS=Mus musculus]	0	15.2	23	1	2	1	124	13.5	7.34	38	6.26	1	1	Pf08923	56692; 545987	ENSMUSG00000091512.5	Lamtor3; Gm5900	1.54077e+06	1.98701e+06	1.42234e+06	1.65551e+06	1.51574e+06	2.06216e+06	1.35215e+06	1926111	608538	1.01221e+06	819717	1.45432e+06	1
High	Master Protein	O88665	Bromodomain-containing protein 7 [OS=Mus musculus]	0	15.978	8	3	6	3	651	74	6.38	18	6.31	3	3	Pf00439, Pf12024	26992	ENSMUSG00000031660.13	Brd7	475685	192323	253073	593094	430001	493034	417451	186429	108276	362629	232546	347708	1
High	Master Protein	O88792	Junctional adhesion molecule A [OS=Mus musculus]	0	28.937	9	2	52	2	300	32.4	6.77	1310	85.15	2	2	Pf00047, Pf07679, Pf07686, Pf13895, Pf13927	16456	ENSMUSG00000038235.4	F11r	950606	1.19107e+06	1.28923e+06	1.26306e+06	1.23832e+06	1.40733e+06	834232	1.15457e+06	551589	772260	669692	992508	1
High	Master Protein	O88840	Mutant fibrillin-1 [OS=Mus musculus]	0	23.712	1	5	71	3	3857	418	4.81	292	22.68	5	5	Pf00683, Pf06247, Pf07645, Pf12662, Pf12947, Pf14670	14118		Fbn1	1.37202e+06	1.88072e+06	1.82147e+06	1.73643e+06	2.39603e+06	2.00401e+06	1.20405e+06	1.82308e+06	779306	1.06168e+06	1.29578e+06	1.41331e+06	1
High	Master Protein	O88844	Isocitrate dehydrogenase [NADP] cytoplasmic [OS=Mus musculus]	0	464.359	57	26	1484	5	414	46.6	7.17	15397	1854.75	26	26	Pf00180, Pf01960	15926	ENSMUSG00000025950.16	Idh1	2.53559e+08	3.49655e+08	2.14892e+08	2.41405e+08	2.8327e+08	2.90677e+08	2.22518e+08	3.38939e+08	9.19402e+07	1.47599e+08	1.53194e+08	2.04998e+08	1	Oxidation [K260]
High	Master Protein	O88895-1	Histone deacetylase 3 [OS=Mus musculus]	0	24.077	10	4	40	3	424	48.3	5.26	339	22.84	4	4	Pf00850	15183		Hdac3	896271	1.31236e+06	985449	1.22483e+06	1.15101e+06	1.30345e+06	786549	1.27214e+06	421618	748881	622470	919247	1
High	Master Protein	O88909	Solute carrier family 22 member 8 [OS=Mus musculus]	0.003	2.9	1	1	7	1	537	59.2	8.4	30	0	1	1	Pf00083, Pf07690	19879	ENSMUSG00000063796.8	Slc22a8	158814	383845	114010	188323	233918	282127	139372	372080	48778.6	115144	126504	198967	1
High	Master Protein	O88952	Protein lin-7 homolog C [OS=Mus musculus]	0	21.696	13	2	16	2	197	21.8	8.43	235	19.39	2	2	Pf00595, Pf02828, Pf09829	22343	ENSMUSG00000027162.7	Lin7c	1.10085e+06	1.89713e+06	878880	1.52593e+06	1.73906e+06	2.01698e+06	966085	1.83898e+06	376024	932979	940492	1.42246e+06	1
High	Master Protein	O88958	glucosamine-6-phosphate isomerase 1 [OS=Mus musculus]	0	120.802	45	10	231	8	289	32.5	6.6	3035	273.33	10	10	Pf01182	26384	ENSMUSG00000052102.14	Gnpda1	1.19825e+07	1.91644e+07	1.01788e+07	1.18214e+07	1.61992e+07	1.66402e+07	1.05156e+07	1.8577e+07	4.35494e+06	7.22781e+06	8.76057e+06	1.17353e+07	1
High	Master Protein	O88967	ATP-dependent zinc metalloprotease YME1L1 [OS=Mus musculus]	0	11.008	4	2	7	2	715	80	8.97	17	7.01	2	2	Pf00004, Pf01078, Pf01434, Pf05496, Pf06068, Pf07724, Pf07728, Pf13191, Pf13207, Pf13401, Pf13481	27377	ENSMUSG00000026775.9	Yme1l1	1.43037e+06	1.63645e+06	1.66478e+06	1.46625e+06	1.40607e+06	1.53437e+06	1.25526e+06	1.58629e+06	712265	896489	760411	1.0821e+06	1
High	Master Protein	O88968	Transcobalamin-2 [OS=Mus musculus]	0	21.352	9	4	24	4	430	47.6	6.33	65	18.61	4	3	Pf01122, Pf14478	21452	ENSMUSG00000020432.12	Tcn2	1.32969e+06	1.65307e+06	965272	1.20534e+06	1.41438e+06	1.80811e+06	1.16691e+06	1.60241e+06	412986	736966	764902	1.27515e+06	1
High	Master Protein	O88983	Syntaxin-8 [OS=Mus musculus]	0	8.856	11	3	35	3	236	26.9	5.01	174	17.56	3	3	Pf05739	55943	ENSMUSG00000020903.13	Stx8	4.50201e+06	6.15566e+06	4.43985e+06	5.09581e+06	5.86507e+06	6.22296e+06	3.95087e+06	5.967e+06	1.89956e+06	3.11567e+06	3.17186e+06	4.38868e+06	1
High	Master Protein	O88986	2-amino-3-ketobutyrate coenzyme A ligase, mitochondrial [OS=Mus musculus]	0	57.393	24	5	48	5	416	44.9	7.33	602	72.38	4	5	Pf00155, Pf00266, Pf00464	26912	ENSMUSG00000006378.13	Gcat	4.11813e+06	5.43613e+06	5.07628e+06	5.27833e+06	6.13633e+06	6.10094e+06	3.61399e+06	5.26952e+06	2.17186e+06	3.22727e+06	3.31855e+06	4.30263e+06	1
High	Master Protein	O89001	Carboxypeptidase D [OS=Mus musculus]	0	23.003	4	4	30	4	1377	152.3	6.18	45	8.84	4	4	Pf00246, Pf04952, Pf13620, Pf13715	12874	ENSMUSG00000020841.5	Cpd	1.52194e+06	3.98849e+06	1.68814e+06	952780	4.0031e+06	1.50234e+06	1.33562e+06	3.86624e+06	722263	582547	2.16489e+06	1.05951e+06	1
High	Master Protein	O89013	Leptin receptor gene-related protein [OS=Mus musculus]	0	11.508	10	1	22	1	131	14.3	4.96	393	24.23	1	1	Pf04133	230514	ENSMUSG00000035212.14	Leprot	339112	431104	411959	346123	530328	421170	297598	417891	176254	211626	286804	297026	1
High	Master Protein	O89017	Legumain [OS=Mus musculus]	0	19.677	9	3	43	3	435	49.3	6.39	951	56.24	2	3	Pf01650	19141	ENSMUSG00000021190.14	Lgmn	2.19742e+06	3.03916e+06	1.62047e+06	2.41783e+06	3.23391e+06	3.04189e+06	1.92841e+06	2.94602e+06	693310	1.47831e+06	1.74891e+06	2.14526e+06	1
High	Master Protein	O89020-1	Afamin [OS=Mus musculus]	0	6.696	2	1	2	1	608	69.3	5.78	32	1.74	1	1	Pf00273	280662	ENSMUSG00000029369.17	Afm	246677	226434	157979	140739	206608	123556	216478	219494	67590.4	86050.3	111734	87137.1	1
High	Master Protein	O89051	Integral membrane protein 2B [OS=Mus musculus]	0	22.84	18	2	24	2	266	30.2	5.3	51	28.59	2	2	Pf04089	16432	ENSMUSG00000022108.7	Itm2b	997847	1.08508e+06	1.36596e+06	1.13937e+06	1.39358e+06	1.52783e+06	875690	1.05182e+06	584417	696633	753654	1.07749e+06	1
High	Master Protein	O89079	coatomer subunit epsilon [OS=Mus musculus]	0	146.38	37	9	241	9	308	34.5	5.06	4581	405.05	9	8	Pf04733	59042	ENSMUSG00000055681.14	Cope	1.0801e+07	1.04354e+07	1.19286e+07	1.46551e+07	1.34136e+07	1.44554e+07	9.47874e+06	1.01155e+07	5.10356e+06	8.96042e+06	7.25414e+06	1.01946e+07	1
High	Master Protein	O89103	Complement component C1q receptor [OS=Mus musculus]	0	21.92	6	3	16	3	644	69.3	5.07	42	8.72	3	3	Pf00059, Pf07645, Pf12662, Pf14670	17064	ENSMUSG00000027435.8	Cd93	901569	1.05509e+06	1.12164e+06	1.25963e+06	1.17337e+06	1.29787e+06	791198	1.02275e+06	479889	770161	634566	915311	1
High	Master Protein	O89110	Caspase-8 [OS=Mus musculus]	0	23.021	7	3	19	3	480	55.3	5.25	44	13.47	3	3	Pf00656, Pf01335	12370	ENSMUSG00000026029.14	Casp8	1.14322e+06	1.39592e+06	1.0995e+06	1.25319e+06	1.15674e+06	1.32708e+06	1.00327e+06	1.35313e+06	470413	766225	625568	935914	1
High	Master Protein	O89112	LanC-like protein 1 [OS=Mus musculus]	0	36.951	13	4	71	4	399	45.3	7.77	825	89.58	4	4	Pf05147	14768	ENSMUSG00000026000.16	Lancl1	2.0937e+06	3.02199e+06	1.88683e+06	2.45882e+06	2.79066e+06	3.15312e+06	1.83739e+06	2.92936e+06	807269	1.50337e+06	1.5092e+06	2.22371e+06	1
High	Master Protein	P00329	Alcohol dehydrogenase 1 [OS=Mus musculus]	0	56.514	19	7	97	7	375	39.7	8.1	1127	84.6	7	6	Pf00107, Pf08240	11522	ENSMUSG00000074207.10	Adh1	6.93635e+06	1.02582e+07	5.71928e+06	4.7527e+06	9.23628e+06	9.79917e+06	6.0872e+06	9.94379e+06	2.44696e+06	2.90589e+06	4.99502e+06	6.91078e+06	1
High	Master Protein	P00375	dihydrofolate reductase [OS=Mus musculus]	0	32.453	34	7	48	7	187	21.6	8.53	456	46.57	7	7	Pf00186, Pf13768	13361	ENSMUSG00000021707.4	Dhfr	8.23527e+06	1.00073e+07	8.05357e+06	8.68819e+06	1.02346e+07	1.0755e+07	7.2271e+06	9.70062e+06	3.44567e+06	5.31212e+06	5.53492e+06	7.5849e+06	1
High	Master Protein	P00405	Cytochrome c oxidase subunit 2 [OS=Mus musculus]	0	156.325	44	6	464	6	227	26	4.73	7196	841.53	6	6	Pf00116, Pf02790	17709; 3338897	ENSMUSG00000064354.1	COX2	2.38677e+08	2.86675e+08	2.12179e+08	3.04044e+08	3.06437e+08	2.95944e+08	2.09458e+08	2.77889e+08	9.07794e+07	1.85898e+08	1.65723e+08	2.08712e+08	1	Oxidation [P93; P166]
High	Master Protein	P00493	Hypoxanthine-guanine phosphoribosyltransferase [OS=Mus musculus]	0	12.56	11	2	22	2	218	24.6	6.68	169	17.7	2	2	Pf00156, Pf15610	15452	ENSMUSG00000025630.8	Hprt	1.77277e+06	2.22031e+06	1.71449e+06	2.08589e+06	2.81136e+06	2.08622e+06	1.55575e+06	2.15226e+06	733533	1.27535e+06	1.5204e+06	1.47129e+06	1
High	Master Protein	P00920	Carbonic anhydrase 2 [OS=Mus musculus]	0	175.069	46	8	309	8	260	29	7.01	3391	480.88	8	8	Pf00194	12349	ENSMUSG00000027562.12	Car2	7.77733e+07	7.30392e+07	3.93185e+07	3.51382e+07	5.11243e+07	5.2531e+07	6.82522e+07	7.08006e+07	1.68222e+07	2.14842e+07	2.76482e+07	3.7047e+07	1	Oxidation [K251]
High	Master Protein	P01027-1	Complement C3 [OS=Mus musculus]	0	760.654	43	62	1294	62	1663	186.4	6.73	12487	1522.79	62	62	Pf00207, Pf01759, Pf01821, Pf01835, Pf07677, Pf07678, Pf07703, Pf10569, Pf11974	12266	ENSMUSG00000024164.15	C3	2.00848e+08	2.25921e+08	1.78587e+08	1.56412e+08	1.91342e+08	1.24237e+08	1.7626e+08	2.18997e+08	7.64075e+07	9.56331e+07	1.03479e+08	8.76172e+07	1
High	Master Protein	P02463	Collagen alpha-1(IV) chain [OS=Mus musculus]	0	75.91	7	7	185	7	1669	160.6	8.24	1162	175.79	6	5	Pf01391, Pf01413	12826	ENSMUSG00000031502.11	Col4a1	1.04923e+07	1.18686e+07	1.05345e+07	1.09113e+07	1.21166e+07	1.21579e+07	9.20781e+06	1.15048e+07	4.50713e+06	6.67137e+06	6.55272e+06	8.57428e+06	1	Oxidation [P301; P304; P310; P313; P588; P594; P1422; P1424; P1425; P1427; P1431; P1436; P1437; P1440]
High	Master Protein	P02468	Laminin subunit gamma-1 [OS=Mus musculus]	0	404.465	27	35	710	1	1607	177.2	5.21	9397	877.64	35	35	Pf00052, Pf00053, Pf00055, Pf01576, Pf05483, Pf05557, Pf06008, Pf06160, Pf08317, Pf13514	226519		Lamc1	394603	1.96942e+06	100376	187474	1.77132e+06	1.28983e+06	346295	1.90906e+06	42945.4	114625	957940	909641	1
High	Master Protein	P04104	Keratin, type II cytoskeletal 1 [OS=Mus musculus]	0	73.106	6	6	280	2	637	65.6	8.15	4414	427.36	6	6	Pf00038, Pf11853	16678	ENSMUSG00000046834.6	Krt1	5.32179e+07	7.66192e+07	3.1948e+08	3.57155e+07	3.66456e+07	6.29555e+07	46702922	74270885	136687544	21837123	1.98181e+07	44398817	1
High	Master Protein	P04117	Fatty acid-binding protein, adipocyte [OS=Mus musculus]	0	209.77	68	9	574	7	132	14.6	8.4	8113	907.01	9	9	Pf00061	11770	ENSMUSG00000062515.3	Fabp4	5.3008e+07	8.59627e+07	4.96179e+07	5.30295e+07	8.1972e+07	9.13405e+07	4.65187e+07	8.3328e+07	2.12287e+07	3.24232e+07	4.43308e+07	6.44171e+07	1	Oxidation [K38; P39]
High	Master Protein	P04444	Hemoglobin subunit beta-H1 [OS=Mus musculus]	0	77.244	42	6	84	5	147	16.5	8.66	764	112.89	6	6	Pf00042	15132	ENSMUSG00000052217.6	Hbb-bh1	5.393e+06	6.54858e+06	4.10392e+06	2.73946e+06	5.27349e+06	1.68451e+06	4.73279e+06	6.34787e+06	1.75584e+06	1.67496e+06	2.85193e+06	1.18799e+06	1
High	Master Protein	P04627	serine/threonine-protein kinase A-Raf [OS=Mus musculus]	0	21.477	7	4	15	2	604	67.5	9.11	47	6.43	4	4	Pf00069, Pf00130, Pf02196, Pf07714, Pf14531	11836	ENSMUSG00000001127.12	Araf	644579	889099	628525	750229	1.01663e+06	968683	565669	861849	268911	458703	549797	683155	1
High	Master Protein	P05064	fructose-bisphosphate aldolase A [OS=Mus musculus]	0	594.816	89	29	1382	28	364	39.3	8.09	22157	2396.44	29	28	Pf00274	11674	ENSMUSG00000030695.14	Aldoa	4.41998e+08	4.95732e+08	3.87571e+08	3.83511e+08	5.26128e+08	4.52595e+08	3.87889e+08	4.80539e+08	1.6582e+08	2.34485e+08	2.84532e+08	319188972	1	Oxidation [P231; P291; K294; P295]
High	Master Protein	P05132-1	cAMP-dependent protein kinase catalytic subunit alpha [OS=Mus musculus]	0	54.818	16	6	162	6	351	40.5	8.79	886	193.06	6	6	Pf00069, Pf07714, Pf14531	18747	ENSMUSG00000005469.10	Prkaca	1.35456e+07	1.62051e+07	1.48309e+07	1.69724e+07	1.68014e+07	1.65651e+07	1.18873e+07	1.57085e+07	6.34533e+06	1.03773e+07	9.08626e+06	1.16824e+07	1
High	Master Protein	P05201	Aspartate aminotransferase, cytoplasmic [OS=Mus musculus]	0	181.128	48	15	316	15	413	46.2	7.14	3743	405.7	15	14	Pf00155	14718	ENSMUSG00000025190.13	Got1	4.10758e+07	5.45146e+07	3.55507e+07	4.45079e+07	5.23438e+07	5.3924e+07	3.60473e+07	5.28438e+07	1.52102e+07	2.7213e+07	2.83077e+07	3.80294e+07	1
High	Master Protein	P05202	Aspartate aminotransferase, mitochondrial [OS=Mus musculus]	0	462.376	65	26	1210	26	430	47.4	9	16898	2052.48	26	26	Pf00155	14719	ENSMUSG00000031672.8	Got2	3.02504e+08	3.73504e+08	2.8647e+08	3.07135e+08	3.81172e+08	3.94013e+08	2.65471e+08	3.62056e+08	1.22564e+08	1.87788e+08	2.0614e+08	2.77874e+08	1
High	Master Protein	P05784	Keratin, type I cytoskeletal 18 [OS=Mus musculus]	0	166.429	49	19	380	16	423	47.5	5.33	3496	379.41	19	19	Pf00038	16668	ENSMUSG00000023043.6	Krt18	2.24058e+07	1.98152e+07	2.33511e+07	3.11608e+07	2.89758e+07	2.45452e+07	1.96629e+07	1.92079e+07	9.99063e+06	1.90523e+07	1.56702e+07	1.73103e+07	1	Oxidation [K73]
High	Master Protein	P06281	Renin-1 [OS=Mus musculus]	0	67.61	24	7	155	7	402	44.3	7.17	1274	184.87	7	7	Pf00026, Pf07966, Pf13650, Pf14541, Pf14543	19701	ENSMUSG00000070645.5	Ren1	1.51245e+07	1.98087e+07	4.40359e+06	1.16761e+07	7.82843e+06	2.13787e+07	1.3273e+07	1.92016e+07	1.88405e+06	7.13899e+06	4.23365e+06	1.50771e+07	1
High	Master Protein	P06467	Hemoglobin subunit zeta [OS=Mus musculus]	0	122.68	70	9	267	8	142	16.2	7.58	2852	317.3	9	9	Pf00042	15126	ENSMUSG00000055609.8	Hba-x	6.80951e+08	4.63306e+08	3.55796e+08	2.67772e+08	2.87512e+08	2.99627e+08	5.97588e+08	4.49106e+08	1.52225e+08	1.63721e+08	1.55488e+08	2.11309e+08	1
High	Master Protein	P06728	Apolipoprotein A-IV [OS=Mus musculus]	0	131.581	48	13	189	13	395	45	5.47	1536	240.25	13	12	Pf01442, Pf07902	11808	ENSMUSG00000032080.6	Apoa4	2.38993e+07	1.71177e+07	1.48125e+07	2.16258e+07	1.98281e+07	1.57258e+07	2.09736e+07	1.65931e+07	6.33746e+06	1.32224e+07	1.07231e+07	1.10905e+07	1	Oxidation [K154]
High	Master Protein	P06745	glucose-6-phosphate isomerase [OS=Mus musculus]	0	377.177	48	22	849	8	558	62.7	8.13	11904	1473.98	22	22	Pf00342	14751	ENSMUSG00000036427.5	Gpi1	1.4953e+08	1.73151e+08	1.3681e+08	1.23921e+08	1.49173e+08	1.39375e+08	1.31225e+08	1.67844e+08	5.85333e+07	7.57675e+07	8.06734e+07	9.82932e+07	1	Oxidation [P403]
High	Master Protein	P06909	complement factor H [OS=Mus musculus]	0	53.754	10	8	34	8	1234	139	6.99	116	20.45	8	8	Pf00084	12628	ENSMUSG00000026365.15	Cfh	6.11371e+06	8.21557e+06	4.05155e+06	4.17992e+06	4.94039e+06	6.10333e+06	5.36526e+06	7.96377e+06	1.73343e+06	2.55568e+06	2.67179e+06	4.30432e+06	1	Oxidation [P1056; P1057; P1060]
High	Master Protein	P07309	Transthyretin [OS=Mus musculus]	0	76.002	39	4	139	4	147	15.8	6.16	2452	259.29	4	4	Pf00576	22139	ENSMUSG00000061808.3	Ttr	1.65879e+07	1.86807e+07	1.54394e+07	1.7756e+07	1.52397e+07	1.74291e+07	1.45572e+07	1.81082e+07	6.60565e+06	1.08563e+07	8.24169e+06	1.22917e+07	1
High	Master Protein	P07356	Annexin A2 [OS=Mus musculus]	0	446.033	74	27	1118	27	339	38.7	7.69	17645	1791.14	27	27	Pf00191	12306	ENSMUSG00000032231.14	Anxa2	2.72963e+08	3.20101e+08	3.11431e+08	2.86578e+08	3.01747e+08	2.91732e+08	2.39547e+08	3.1029e+08	1.33244e+08	1.75219e+08	1.63186e+08	2.05742e+08	1
High	Master Protein	P07724	Serum albumin [OS=Mus musculus]	0	1217.63	77	54	5683	54	608	68.6	6.07	73603	8646.28	54	54	Pf00273	11657	ENSMUSG00000029368.10	Alb	5.07191e+09	4.02707e+09	4.30699e+09	3.62378e+09	4.01517e+09	2.46743e+09	4.45101e+09	3.90364e+09	1.84272e+09	2.21565e+09	2.17142e+09	1.74014e+09	1	Oxidation [P138; P142; K152; P155; P510]
High	Master Protein	P07758	Alpha-1-antitrypsin 1-1 [OS=Mus musculus]	0	171.444	40	12	245	4	413	46	5.72	3590	366.05	12	12	Pf00079	20700; 20703	ENSMUSG00000066366.14	Serpina1a; Serpina1d	4.88197e+07	4.61274e+07	3.7973e+07	4.0057e+07	3.78967e+07	3.30853e+07	4.28431e+07	4.47136e+07	1.62465e+07	2.44916e+07	2.04947e+07	2.33331e+07	1
High	Master Protein	P07759	Serine protease inhibitor A3K [OS=Mus musculus]	0	159.089	35	12	82	10	418	46.9	5.16	1297	111.47	12	12	Pf00079	20714		Serpina3k	262989	2.36543e+07	303275	285680	1.52447e+07	157498	230794	2.29293e+07	129755	174670	8.24439e+06	111074	1
High	Master Protein	P07901	Heat shock protein HSP 90-alpha [OS=Mus musculus]	0	760.293	53	44	3682	27	733	84.7	5.01	55503	5631.63	42	44	Pf00183, Pf02518, Pf13589	15519	ENSMUSG00000021270.13	Hsp90aa1	3.11099e+08	3.04605e+08	2.93885e+08	2.95546e+08	2.89596e+08	2.92432e+08	2.73014e+08	2.9527e+08	1.25737e+08	1.80702e+08	1.56615e+08	2.06235e+08	1	Oxidation [K100]
High	Master Protein	P08030	Adenine phosphoribosyltransferase [OS=Mus musculus]	0	106.402	33	5	162	5	180	19.7	6.79	3001	248.26	5	5	Pf00156	11821	ENSMUSG00000006589.8	Aprt	7.06078e+06	1.04187e+07	1.25267e+07	7.86277e+06	1.40892e+07	1.07932e+07	6.19639e+06	1.00994e+07	5.35946e+06	4.80744e+06	7.6195e+06	7.6118e+06	1
High	Master Protein	P08032	spectrin alpha chain, erythrocytic 1 [OS=Mus musculus]	0	233.818	14	26	156	25	2415	279.7	5.03	1206	183.14	26	26	Pf00018, Pf00435, Pf07653, Pf08726, Pf14604	20739	ENSMUSG00000026532.7	Spna1; Spta1	2.55006e+07	1.05899e+07	1.08972e+07	7.89197e+06	7.44573e+06	7.99186e+06	2.23788e+07	1.02654e+07	4.66231e+06	4.82529e+06	4.02669e+06	5.63619e+06	1
High	Master Protein	P08071	Lactotransferrin [OS=Mus musculus]	0	4.878	3	1	1	1	707	77.8	8.53		0		1	Pf00405, Pf12974	17002	ENSMUSG00000032496.7	Ltf	158926	302733		347863	236512	278490	139470	293454		212690	127907	196403	1
High	Master Protein	P08122	Collagen alpha-2(IV) chain [OS=Mus musculus]	0	63.221	5	6	102	6	1707	167.2	8.48	882	89.53	6	6	Pf01391, Pf01413	12827	ENSMUSG00000031503.13	Col4a2	5.3492e+06	7.16786e+06	5.7257e+06	6.28423e+06	7.60825e+06	7.6586e+06	4.69435e+06	6.94817e+06	2.44971e+06	3.84229e+06	4.11457e+06	5.40116e+06	1	Oxidation [P768; P776]
High	Master Protein	P08228	Superoxide dismutase [Cu-Zn] [OS=Mus musculus]	0	93.923	43	6	193	6	154	15.9	6.51	3315	265.56	6	6	Pf00080	20655	ENSMUSG00000022982.9	Sod1	2.42495e+07	3.19675e+07	2.21108e+07	2.5677e+07	3.22403e+07	2.64412e+07	2.12809e+07	3.09877e+07	9.46e+06	1.56994e+07	1.74357e+07	1.86474e+07	1
High	Master Protein	P08249	Malate dehydrogenase, mitochondrial [OS=Mus musculus]	0	283.064	66	19	1219	19	338	35.6	8.68	17119	1791.05	19	19	Pf00056, Pf01073, Pf01118, Pf02866, Pf13460	17448	ENSMUSG00000019179.10	Mdh2	4.58162e+08	5.54634e+08	4.58643e+08	4.9493e+08	5.43845e+08	6.01989e+08	4.02073e+08	5.37635e+08	1.96228e+08	3.02609e+08	2.94114e+08	4.24547e+08	1
High	Master Protein	P08752	guanine nucleotide-binding protein G(i) subunit alpha-2 [OS=Mus musculus]	0	266.623	56	16	589	11	355	40.5	5.45	8330	930.69	15	16	Pf00025, Pf00503	14678	ENSMUSG00000032562.13	Gnai2	7.7e+07	8.68648e+07	8.05889e+07	8.58654e+07	9.40542e+07	9.73973e+07	6.75736e+07	8.42024e+07	34479484	5.24997e+07	5.08649e+07	6.86886e+07	1
High	Master Protein	P08905	lysozyme c-2 [OS=Mus musculus]	0	81.373	47	6	231	6	148	16.7	8.81	2958	340.67	6	6	Pf00062, Pf01464	17105	ENSMUSG00000069516.8	Lyz2	5.44924e+07	5.60818e+07	3.93487e+07	4.47732e+07	4.84283e+07	6.90192e+07	4.78214e+07	5.43629e+07	1.68351e+07	2.73751e+07	2.61903e+07	4.86752e+07	1
High	Master Protein	P09055	Integrin beta-1 [OS=Mus musculus]	0	160.777	21	15	329	15	798	88.2	5.94	4731	450.61	15	15	Pf00362, Pf07965, Pf08725	16412	ENSMUSG00000025809.15	Itgb1	4.58565e+07	4.61728e+07	5.015e+07	4.83871e+07	5.16958e+07	4.65869e+07	4.02427e+07	4.47577e+07	2.14564e+07	2.95847e+07	2.79573e+07	3.2855e+07	1
High	Master Protein	P09103	Protein disulfide-isomerase [OS=Mus musculus]	0	461.172	60	30	1356	30	509	57	4.88	19338	1849.28	30	30	Pf00085, Pf01216, Pf13098, Pf13848, Pf13899, Pf13905	18453	ENSMUSG00000025130.11	P4hb	3.99563e+08	3.27667e+08	3.44904e+08	3.69197e+08	3.43295e+08	3.63201e+08	3.50648e+08	3.17625e+08	1.47565e+08	2.25734e+08	1.85655e+08	2.56144e+08	1	Oxidation [P355]
High	Master Protein	P09411	phosphoglycerate kinase 1 [OS=Mus musculus]	0	433.024	74	29	1451	29	417	44.5	7.9	20445	2359.59	29	29	Pf00162	18655	ENSMUSG00000062070.12	Pgk1	3.85955e+08	4.87593e+08	3.7551e+08	3.68704e+08	4.79389e+08	4.54006e+08	3.38706e+08	4.72648e+08	1.6066e+08	2.25432e+08	2.59256e+08	3.20184e+08	1	Oxidation [P28; K30; P67; P71; P73; K75]
High	Master Protein	P09528	Ferritin heavy chain [OS=Mus musculus]	0.003	2.79	4	1	28	1	182	21.1	5.88	110	11.91	1	1	Pf00210	14319	ENSMUSG00000024661.6	Fth1	669930	719136	645684	735911	604346	726000	587917	697095	276252	449949	326833	512005	1
High	Master Protein	P09535	Insulin-like growth factor II [OS=Mus musculus]	0	19.586	13	2	44	2	180	20	9.16	567	43.46	2	2	Pf00049, Pf08365	16002	ENSMUSG00000048583.16	Igf2	618354	804855	698165	703305	977943	1.03199e+06	542655	780187	298706	430014	528876	727798	1
High	Master Protein	P09671	Superoxide dismutase [Mn], mitochondrial [OS=Mus musculus]	0	30.878	17	5	98	5	222	24.6	8.62	823	113.38	5	5	Pf00081, Pf02777	20656	ENSMUSG00000006818.4	Sod2	8.4192e+06	1.04307e+07	6.90552e+06	8.44094e+06	1.1402e+07	1.46417e+07	7.38851e+06	1.0111e+07	2.95449e+06	5.16094e+06	6.16628e+06	1.03259e+07	1
High	Master Protein	P0C027	Diphosphoinositol polyphosphate phosphohydrolase 3-alpha [OS=Mus musculus]	0.001	3.368	5	1	4	1	164	18.6	5.69	25	3.29	1	1	Pf00293	58242; 102954	ENSMUSG00000073295.4; ENSMUSG00000073293.4	Nudt11; Nudt10	1.2706e+06	1.30448e+06	1.21071e+06	1.17361e+06	1.37231e+06	1.2688e+06	1115055	1.2645e+06	517996	717565	742153	894808	1
High	Master Protein	P0C0A3	charged multivesicular body protein 6 [OS=Mus musculus]	0	36.29	14	2	48	2	200	23.4	5.44	462	40.15	2	2	Pf03357	208092	ENSMUSG00000025371.12	Chmp6	1.17295e+06	1.32506e+06	1.26837e+06	1.55346e+06	1.50441e+06	1.64533e+06	1.02936e+06	1.28445e+06	542664	949815	813589	1.16035e+06	1
High	Master Protein	P0DN34	NADH dehydrogenase [ubiquinone] 1 beta subcomplex subunit 1 [OS=Mus musculus]	0	6.029	19	1	6	1	57	7	8.21	28	7.55	1	1	Pf08040	102631912		LOC102631912	244025	283949		402805	490964	586537	214151	275246		246282	265515	413650	1
High	Master Protein	P10126	Elongation factor 1-alpha 1 [OS=Mus musculus]	0	728.997	69	27	3066	17	462	50.1	9.01	44920	5834.7	27	27	Pf00009, Pf03143, Pf03144	13627	ENSMUSG00000037742.14	Eef1a1; LOC101056619	3.45103e+09	3.29252e+09	3.61374e+09	3.42741e+09	3.37034e+09	3.40237e+09	3.02855e+09	3.19161e+09	1.54612e+09	2.09558e+09	1.8227e+09	2.39949e+09	1	Oxidation [K154; P209; K273; P274; K408; P409]
High	Master Protein	P10493	Nidogen-1 [OS=Mus musculus]	0	425.004	39	31	703	30	1245	136.5	5.44	7133	1063.88	30	31	Pf00008, Pf00058, Pf00086, Pf06119, Pf06247, Pf07474, Pf07645, Pf12662, Pf12947, Pf14670	18073	ENSMUSG00000005397.7	Nid1	6.42231e+07	7.00627e+07	5.83492e+07	6.15214e+07	6.39843e+07	7.57637e+07	5.63609e+07	6.79153e+07	2.49644e+07	3.76153e+07	3.4603e+07	5.34317e+07	1
High	Master Protein	P10605	Cathepsin B [OS=Mus musculus]	0	141.454	32	9	231	9	339	37.3	5.91	2292	256.78	8	9	Pf00112, Pf08127	13030	ENSMUSG00000021939.7	Ctsb	1.5324e+07	2.74168e+07	1.28691e+07	1.51615e+07	2.32459e+07	1.89554e+07	1.3448e+07	2.65765e+07	5.50597e+06	9.27002e+06	1.25715e+07	1.33681e+07	1
High	Master Protein	P10639	thioredoxin [OS=Mus musculus]	0	40.201	40	4	77	4	105	11.7	4.92	353	44.49	4	4	Pf00085, Pf13098, Pf13899, Pf13905	22166	ENSMUSG00000028367.5	Txn1	1.45347e+07	1.36219e+07	1.11647e+07	1.41931e+07	1.63153e+07	1.67312e+07	1.27553e+07	1.32044e+07	4.77674e+06	8.67795e+06	8.82341e+06	1.17995e+07	1
High	Master Protein	P10649	Glutathione S-transferase Mu 1 [OS=Mus musculus]	0	148.053	56	14	217	12	218	26	7.94	3111	268.02	14	13	Pf00043, Pf02798, Pf13417, Pf14497	14862	ENSMUSG00000058135.12	Gstm1	3.87269e+07	3.94469e+07	2.77372e+07	3.27526e+07	3.54527e+07	3.74875e+07	3.39859e+07	3.82379e+07	1.18672e+07	2.00255e+07	1.9173e+07	2.64377e+07	1
High	Master Protein	P10711	Transcription elongation factor A protein 1 [OS=Mus musculus]	0	47.881	28	7	88	7	301	33.9	8.38	692	96.16	7	7	Pf01096, Pf07500, Pf08711	21399	ENSMUSG00000033813.15	Tcea1	4.91269e+06	5.23589e+06	4.98037e+06	6.12443e+06	6.73014e+06	6.30939e+06	4.31128e+06	5.07541e+06	2.13082e+06	3.74459e+06	3.63969e+06	4.44964e+06	1
High	Master Protein	P10833	Ras-related protein R-Ras [OS=Mus musculus]	0	10.391	8	2	42	1	218	23.7	6.79	247	37.96	2	2	Pf00071, Pf08477	20130	ENSMUSG00000038387.9	Rras	3.52119e+06	4.35643e+06	3.34091e+06	3.26325e+06	4.57894e+06	4.65517e+06	3.09013e+06	4.22291e+06	1.42939e+06	1.99521e+06	2.47631e+06	3.28301e+06	1
High	Master Protein	P10852	4F2 cell-surface antigen heavy chain [OS=Mus musculus]	0	121.381	26	11	218	11	526	58.3	5.91	1883	236.82	11	11	Pf00128	17254	ENSMUSG00000010095.13	Slc3a2	2.08738e+07	2.53543e+07	1.8559e+07	2.6579e+07	2.24166e+07	2.90934e+07	1.83185e+07	2.45772e+07	7.94034e+06	1.62509e+07	1.2123e+07	2.05178e+07	1
High	Master Protein	P11031	Activated RNA polymerase II transcriptional coactivator p15 [OS=Mus musculus]	0	92.56	45	7	186	7	127	14.4	9.6	1712	195.51	7	7	Pf02229	20024	ENSMUSG00000022205.15	Sub1	2.11216e+07	2.27215e+07	2.61894e+07	2.8679e+07	2.33998e+07	2.56005e+07	1.85359e+07	2.20251e+07	1.1205e+07	1.75348e+07	1.26547e+07	1.80545e+07	1	Oxidation [K97]
High	Master Protein	P11087-1	Collagen alpha-1(I) chain [OS=Mus musculus]	0	152.313	23	17	196	17	1453	137.9	5.85	1601	148.06	17	15	Pf00093, Pf01391, Pf01410	12842	ENSMUSG00000001506.10	Col1a1	9.76228e+06	6.41573e+06	4.99903e+06	7.29883e+06	9.44689e+06	6.02213e+06	8.56717e+06	6.2191e+06	2.13881e+06	4.46263e+06	5.10892e+06	4.24705e+06	1	Oxidation [P464; P466; P470; P472; P473; P590; P592; P593; P598; P611; P757; P760; P763; P767; K770; P775; P781; P788; P796; P797; P799; P805; K815; P860; P866; P917; P919; K923; P926; P931; P935; P1034; P1037; P1040; P1043; K1051; P1109; P1112; P1115]
High	Master Protein	P11352	Glutathione peroxidase 1 [OS=Mus musculus]	0	91.203	61	7	159	7	201	22.3	7.21	944	172.91	7	7	Pf00255	14775	ENSMUSG00000063856.7	Gpx1	1.31221e+07	1.16723e+07	1.1864e+07	1.27957e+07	1.08587e+07	1.49808e+07	1.15157e+07	1.13145e+07	5.07593e+06	7.8235e+06	5872441	1.05651e+07	1	Oxidation [P138]
High	Master Protein	P11404	Fatty acid-binding protein, heart [OS=Mus musculus]	0	60.218	33	4	128	4	133	14.8	6.57	1141	145.91	4	4	Pf00061, Pf14651	14077	ENSMUSG00000028773.8	Fabp3	8.33537e+06	1.62451e+07	6.41463e+06	8.40592e+06	1.52965e+07	1.66381e+07	7.31495e+06	1.57472e+07	2.74446e+06	5.13953e+06	8.27244e+06	1.17339e+07	1
High	Master Protein	P11440	Cyclin-dependent kinase 1 [OS=Mus musculus]	0	80.144	31	8	214	6	297	34.1	8.43	1234	269.83	7	8	Pf00069, Pf01636, Pf07714, Pf14531	12534	ENSMUSG00000019942.13	Cdk1	1.40306e+07	1.60217e+07	1.56951e+07	1.62454e+07	1.69338e+07	1.60963e+07	1.2313e+07	1.55306e+07	6.71505e+06	9932705	9.15789e+06	1.13518e+07	1
High	Master Protein	P11499	Heat shock protein HSP 90-beta [OS=Mus musculus]	0	1001.91	64	50	5327	31	724	83.2	5.03	80149	8031.89	48	50	Pf00183, Pf02518, Pf13589	15516	ENSMUSG00000023944.14	Hsp90ab1	1.958e+09	2.0624e+09	2.0339e+09	1.94128e+09	1.97998e+09	1.99371e+09	1.7183e+09	1.99919e+09	8.70191e+08	1.18693e+09	1.07078e+09	1.40604e+09	1	Oxidation [K95; K623]
High	Master Protein	P11531	Dystrophin [OS=Mus musculus]	0	16.986	1	4	23	3	3678	425.6	5.94	69	9.15	4	4	Pf00307, Pf00397, Pf00435, Pf00569, Pf02463, Pf09068, Pf09069, Pf11971	13405	ENSMUSG00000045103.17	Dmd	379104	509846	449500	164594	145403	182056	332694	494220	192316	100635	78634.7	128393	1
High	Master Protein	P11679	Keratin, type II cytoskeletal 8 [OS=Mus musculus]	0	255.63	44	24	481	16	490	54.5	5.82	4851	540.28	24	24	Pf00038, Pf01576, Pf04111, Pf09726, Pf10186, Pf12128, Pf13166, Pf13514, Pf15003	16691	ENSMUSG00000049382.9	Krt8	5.09935e+07	4.04543e+07	8.52892e+07	4.86946e+07	3.80895e+07	3.62446e+07	4.47508e+07	3.92144e+07	3.64905e+07	2.97728e+07	2.0599e+07	2.55612e+07	1
High	Master Protein	P11859	Angiotensinogen [OS=Mus musculus]	0	100.591	19	8	87	8	477	52	5.44	1518	109.27	8	8	Pf00079	11606		Agt	4.32079e+06	6.66768e+06	4.79942e+06	7.14736e+06	4.99497e+06	1.08486e+07	3.79183e+06	6.46332e+06	2.0534e+06	4.37002e+06	2.7013e+06	7.65089e+06	1
High	Master Protein	P11862	Growth arrest-specific protein 2 [OS=Mus musculus]	0	32.141	17	4	51	4	314	34.9	8.57	363	30.58	4	4	Pf00307, Pf02187	14453	ENSMUSG00000030498.15	Gas2	1.90856e+06	2.9699e+06	1.90207e+06	2.57661e+06	3.31538e+06	2.98105e+06	1.67491e+06	2.87887e+06	813788	1.57538e+06	1.79297e+06	2.10236e+06	1
High	Master Protein	P11881-1	Inositol 1,4,5-trisphosphate receptor type 1 [OS=Mus musculus]	0	101.622	7	16	153	13	2749	313	6.04	529	69.33	16	16	Pf00520, Pf01365, Pf02815, Pf08454, Pf08709	16438	ENSMUSG00000030102.11	Itpr1	9.96032e+06	9.92808e+06	6.96478e+06	8.59286e+06	9.45564e+06	9.19072e+06	8.74097e+06	9.62379e+06	2.97984e+06	5.25383e+06	5.11365e+06	6.48167e+06	1
High	Master Protein	P11930	nucleoside diphosphate-linked moiety X motif 19 [OS=Mus musculus]	0	22.652	8	2	20	2	357	40.3	6.68	95	18.1	2	2		110959	ENSMUSG00000034875.5	Nudt19	518946	1.03657e+06	409601	822610	622185	476374	455416	1.0048e+06	175245	502959	336480	335958	1
High	Master Protein	P11983	T-complex protein 1 subunit alpha [OS=Mus musculus]	0	490.17	57	27	1158	27	556	60.4	6.16	20234	1911.42	27	27	Pf00118	21454	ENSMUSG00000068039.12	Tcp1	3.48902e+08	3.40778e+08	3.871e+08	3.86406e+08	3.76458e+08	3.76533e+08	3.06189e+08	3.30333e+08	1.65619e+08	2.36255e+08	2.0359e+08	2.65547e+08	1
High	Master Protein	P12246	Serum amyloid P-component [OS=Mus musculus]	0	27.027	18	3	31	3	224	26.2	6.35	273	28.4	3	3	Pf00354, Pf13385	20219	ENSMUSG00000026542.6	Apcs	720999	2.87481e+06	704333	600501	2.45695e+06	896400	632734	2.78669e+06	301345	367157	1.32873e+06	632178	1
High	Master Protein	P12382	ATP-dependent 6-phosphofructokinase, liver type [OS=Mus musculus]	0	233.986	25	17	512	12	780	85.3	7.17	6680	680.47	16	17	Pf00365	18641	ENSMUSG00000020277.10	Pfkl	4.99988e+07	6.50773e+07	4.61777e+07	4.85706e+07	6.73152e+07	5.40567e+07	4.38779e+07	6.30827e+07	1.97569e+07	2.96969e+07	3.64044e+07	3.8123e+07	1
High	Master Protein	P12787	Cytochrome c oxidase subunit 5A, mitochondrial [OS=Mus musculus]	0	9.597	12	2	18	2	146	16.1	6.54	70	14.48	2	2	Pf02284	12858	ENSMUSG00000000088.7	Cox5a	3.51027e+06	3.80865e+06	2.27432e+06	4.18259e+06	4.7005e+06	3.61189e+06	3.08054e+06	3691917	973055	2.55731e+06	2542050	2.54725e+06	1
High	Master Protein	P12815	programmed cell death protein 6 [OS=Mus musculus]	0	21.886	11	2	28	2	191	21.9	5.4	193	34.63	2	2	Pf00036, Pf13405, Pf13499, Pf13833	18570	ENSMUSG00000021576.5	Pdcd6	2.30382e+06	2.5796e+06	3.73782e+06	3.47987e+06	4.08192e+06	2.72567e+06	2.02178e+06	2.50054e+06	1.5992e+06	2.12766e+06	2.20752e+06	1.92225e+06	1
High	Master Protein	P12970	60S ribosomal protein L7a [OS=Mus musculus]	0	285.633	45	18	909	18	266	30	10.56	13040	1403.91	18	18	Pf01248	27176	ENSMUSG00000062647.16	Rpl7a	3.17863e+08	3.25316e+08	3.60112e+08	3.69749e+08	3.66631e+08	3.5863e+08	2.7895e+08	3.15345e+08	1.54072e+08	2.26071e+08	1.98276e+08	2.52921e+08	1
High	Master Protein	P13020-2	Isoform 2 of Gelsolin [OS=Mus musculus]	0	282.827	37	22	567	22	731	80.7	5.76	7355	816.79	22	21	Pf00626	227753	ENSMUSG00000026879.14	Gsn	1.18475e+08	9.11272e+07	1.11873e+08	1.03217e+08	9.83213e+07	9.39777e+07	1.03972e+08	8.83343e+07	4.78642e+07	6.31089e+07	5.31726e+07	6.62769e+07	1
High	Master Protein	P13439	uridine 5'-monophosphate synthase [OS=Mus musculus]	0	63.303	23	11	154	11	481	52.3	6.61	987	136.07	11	11	Pf00156, Pf00215	22247	ENSMUSG00000022814.6	Umps	1.19099e+08	8.89083e+07	1.04309e+08	7.29532e+07	7.00383e+07	7.46557e+07	1.04519e+08	8.61833e+07	4.4628e+07	4.46049e+07	3.78771e+07	5.26503e+07	1
High	Master Protein	P14115	60S ribosomal protein L27a [OS=Mus musculus]	0	122.646	33	7	323	7	148	16.6	11.12	4388	462.9	7	7	Pf00828	26451	ENSMUSG00000046364.14	Rpl27a	6.50943e+07	7.6127e+07	7.29518e+07	7.87588e+07	7.87871e+07	8.8132e+07	5.71254e+07	7.37938e+07	3.1212e+07	4.81545e+07	4.26084e+07	6.21543e+07	1
High	Master Protein	P14131	40S ribosomal protein S16 [OS=Mus musculus]	0	139.831	64	13	802	13	146	16.4	10.21	7789	1018.15	13	12	Pf00380	100039355; 20055	ENSMUSG00000037563.15	Rps16-ps2; Rps16	3.38732e+08	3.47254e+08	3.97216e+08	3.78255e+08	3.77547e+08	4.35549e+08	2.97264e+08	3.36611e+08	1.69946e+08	2.31272e+08	2.04179e+08	3.07167e+08	1
High	Master Protein	P14148	60S ribosomal protein L7 [OS=Mus musculus]	0	203.638	44	18	643	18	270	31.4	10.89	6225	844.03	18	18	Pf00327, Pf08079	19989	ENSMUSG00000043716.13	Rpl7	1.49516e+08	1.6241e+08	1.92381e+08	1.87144e+08	1.74858e+08	1.64513e+08	1.31212e+08	1.57433e+08	8.23089e+07	1.14423e+08	9.45641e+07	1.16021e+08	1
High	Master Protein	P14152	Malate dehydrogenase, cytoplasmic [OS=Mus musculus]	0	234.854	48	13	605	13	334	36.5	6.58	10380	977.58	13	13	Pf00056, Pf02866	17449	ENSMUSG00000020321.15	Mdh1	3.40743e+08	4.545e+08	3.03823e+08	3.46545e+08	4.28105e+08	4.47961e+08	2.99029e+08	4.4057e+08	1.29989e+08	2.11884e+08	2.31521e+08	3.15921e+08	1	Oxidation [P193; K199; K220]
High	Master Protein	P14206	40S ribosomal protein SA [OS=Mus musculus]	0	320.969	55	15	817	15	295	32.8	4.87	13985	1418.46	15	15	Pf00318	16785; 100045332; 102642689	ENSMUSG00000032518.6	Rpsa; LOC100045332; LOC100505031; LOC102642689	2.94944e+08	3.20059e+08	3.52067e+08	3.83682e+08	3.50253e+08	3.82496e+08	2.58837e+08	3.10249e+08	1.5063e+08	2.3459e+08	1.89418e+08	2.69752e+08	1
High	Master Protein	P14246	Solute carrier family 2, facilitated glucose transporter member 2 [OS=Mus musculus]	0	5.027	2	1	6	1	523	57.1	6.73	61	6.13	1	1	Pf00083, Pf07690, Pf13347	20526	ENSMUSG00000027690.13	Slc2a2	1.3537e+06	1.72399e+06			1.73972e+06	2.01841e+06	1.18798e+06	1.67115e+06			940850	1423465	1
High	Master Protein	P14576-1	signal recognition particle 54 kDa protein [OS=Mus musculus]	0	65.299	13	5	95	5	504	55.7	8.75	369	104.33	5	5	Pf00448, Pf01656, Pf02881, Pf02978, Pf03205, Pf09974, Pf13207, Pf13671	24067; 665155	ENSMUSG00000073079.5; ENSMUSG00000112449.1	Srp54a; Srp54b	4.31672e+06	5.18773e+06	4.7167e+06	5.55137e+06	4.82805e+06	5.16835e+06	3.78827e+06	5.02873e+06	2.01801e+06	3.39421e+06	2.61103e+06	3.64494e+06	1
High	Master Protein	P14602	Heat shock protein beta-1 [OS=Mus musculus]	0	11.801	8	1	10	1	209	23	6.55	25	8.33	1	1	Pf00011	15507	ENSMUSG00000004951.10	Hspb1	365690	123564	317830	407449	398412	507847	320922	119776	135982	249121	215463	358155	1
High	Master Protein	P14685	26S proteasome non-ATPase regulatory subunit 3 [OS=Mus musculus]	0	329.137	56	25	700	25	530	60.7	8.44	8179	986.79	25	25	Pf01399, Pf08375	22123	ENSMUSG00000017221.14	Psmd3	7.40784e+07	8.73014e+07	7.70269e+07	7.70909e+07	7.99255e+07	8.37263e+07	6.50097e+07	8.46257e+07	3.29555e+07	4.71348e+07	4.32241e+07	5.90472e+07	1	Oxidation [P27; P28; P30; K36]
High	Master Protein	P14733	Lamin-B1 [OS=Mus musculus]	0	1001.08	69	53	2491	44	588	66.7	5.16	33769	3690.06	52	53	Pf00038, Pf00932, Pf01576, Pf04111, Pf09726, Pf10186, Pf12128	16906	ENSMUSG00000024590.8	Lmnb1	7.12135e+08	5.83179e+08	6.04521e+08	6.38361e+08	5.71414e+08	5.93956e+08	6.24955e+08	5.65305e+08	2.58641e+08	3.90305e+08	3.09024e+08	4.18882e+08	1	Oxidation [P466]
High	Master Protein	P15105	Glutamine synthetase [OS=Mus musculus]	0	104.046	28	9	223	9	373	42.1	7.08	2380	297.73	9	9	Pf00120, Pf03951	14645	ENSMUSG00000026473.15	Glul	1.3406e+07	1.30592e+07	1.1865e+07	1.51783e+07	1.21024e+07	1.35873e+07	1.17648e+07	1.2659e+07	5.07637e+06	9.28028e+06	6.54504e+06	9.5823e+06	1
High	Master Protein	P15532	Nucleoside diphosphate kinase A [OS=Mus musculus]	0	149.264	69	10	655	3	152	17.2	7.37	8528	901.05	10	10	Pf00334	18102	ENSMUSG00000037601.11	Nme1	1.66946e+07	1.55501e+07	1.68471e+07	1.4793e+07	1.69965e+07	1.34608e+07	1.46509e+07	1.50735e+07	7.20795e+06	9.0447e+06	9.19179e+06	9493087	1
High	Master Protein	P15626	Glutathione S-transferase Mu 2 [OS=Mus musculus]	0	119.983	49	10	161	8	218	25.7	7.39	2137	210.02	10	9	Pf00043, Pf02798, Pf13409, Pf13417, Pf14497	14863	ENSMUSG00000040562.12	Gstm2	8.32726e+06	1.19725e+07	5.97849e+06	6.45107e+06	9.67519e+06	1.15803e+07	7.30784e+06	1.16055e+07	2.55786e+06	3.9443e+06	5.23239e+06	8.16687e+06	1
High	Master Protein	P15864	Histone H1.2 [OS=Mus musculus]	0	148.976	34	11	966	1	212	21.3	11	12267	1085.12	11	10	Pf00538	50708	ENSMUSG00000036181.2	Hist1h1c	296413	163306	411313	326530	248989	231745	260126	158301	175978	199646	134654	163436	1
High	Master Protein	P15920	V-type proton ATPase 116 kDa subunit a isoform 2 [OS=Mus musculus]	0	26.387	6	5	60	4	856	98.1	6.64	291	42.44	5	5	Pf01496	21871	ENSMUSG00000038023.12	Atp6v0a2	1.49035e+06	1.72912e+06	1.47059e+06	1.64676e+06	1.53325e+06	1.47902e+06	1.3079e+06	1.67612e+06	629181	1.00686e+06	829188	1.04307e+06	1	Oxidation [K551]
High	Master Protein	P16045	Galectin-1 [OS=Mus musculus]	0	129.544	41	5	321	5	135	14.9	5.49	5141	474.61	5	5	Pf00337	16852	ENSMUSG00000068220.5	Lgals1	2.8297e+07	2.78786e+07	2.71838e+07	2.76289e+07	2.88097e+07	3.3523e+07	2.48329e+07	2.70242e+07	1.16304e+07	1.68928e+07	1.55804e+07	2.36418e+07	1
High	Master Protein	P16056	Hepatocyte growth factor receptor [OS=Mus musculus]	0	7.318	1	1	36	1	1379	153.5	7.05	0	14.88	1	1	Pf00069, Pf01403, Pf01437, Pf01833, Pf07714	17295		Met	3.44412e+06	4.82458e+06	2.53625e+06	4.14037e+06	4.08537e+06	6.03254e+06	3.02249e+06	4.67671e+06	1.08512e+06	2.5315e+06	2.20939e+06	4.2544e+06	1
High	Master Protein	P16125	L-lactate dehydrogenase B chain [OS=Mus musculus]	0	333.748	49	16	1100	15	334	36.5	6.05	13874	1493.21	16	16	Pf00056, Pf02866	16832	ENSMUSG00000030246.11	Ldhb	4.07884e+08	5.72886e+08	3.53785e+08	4.03516e+08	4.97919e+08	4.85504e+08	3.57951e+08	5.55327e+08	1.51365e+08	2.46717e+08	2.69277e+08	3.42397e+08	1	Oxidation [K60]
High	Master Protein	P16331	phenylalanine-4-hydroxylase [OS=Mus musculus]	0	71.95	29	11	97	11	453	51.9	6.3	670	92.48	11	10	Pf00351, Pf01842	18478	ENSMUSG00000020051.17	Pah	8.08792e+06	1.35521e+07	5.07977e+06	1.02492e+07	9.34326e+06	1.83942e+07	7.09779e+06	1.31368e+07	2.17335e+06	6.26655e+06	5.05288e+06	1.29723e+07	1
High	Master Protein	P16332	Methylmalonyl-CoA mutase, mitochondrial [OS=Mus musculus]	0	186.784	27	14	344	14	748	82.8	6.89	3096	447.14	14	14	Pf01642, Pf02310	17850	ENSMUSG00000023921.8	Mut	1.88621e+07	2.09411e+07	1.72693e+07	2.08305e+07	1.8884e+07	2.27216e+07	1.6553e+07	2.02993e+07	7.38856e+06	1.27362e+07	1.02126e+07	1.60242e+07	1	Oxidation [K455]
High	Master Protein	P16406	Glutamyl aminopeptidase [OS=Mus musculus]	0	351.987	33	28	749	28	945	107.9	5.44	6633	910.89	27	28	Pf01433, Pf11838, Pf13485	13809	ENSMUSG00000028024.14	Enpep	1.14182e+08	1.34531e+08	1.03686e+08	1.08621e+08	1.25717e+08	1.26774e+08	1.00204e+08	1.30407e+08	4.43615e+07	6.64131e+07	6.79885e+07	8.94063e+07	1	Acetyl [N-Term]
High	Master Protein	P16460	Argininosuccinate synthase [OS=Mus musculus]	0	256.953	40	20	645	20	412	46.6	8.22	7057	995.84	20	20	Pf00764, Pf03054, Pf06508	11898	ENSMUSG00000076441.9	Ass1	1.37561e+08	2.41347e+08	1.04627e+08	1.27551e+08	1.99968e+08	2.29249e+08	1.2072e+08	233949731	4.47639e+07	7.79872e+07	1.08144e+08	1.61676e+08	1	Oxidation [P148]
High	Master Protein	P16546	Spectrin alpha chain, non-erythrocytic 1 [OS=Mus musculus]	0	1980	57	121	3287	1	2472	284.4	5.33	44035	5050.95	120	120	Pf00018, Pf00036, Pf00435, Pf07653, Pf08239, Pf08726, Pf12128, Pf13405, Pf13499, Pf14604	20740	ENSMUSG00000057738.13	Spna2; Sptan1	6.56458e+06	6.91786e+06	6.13441e+06	6.26982e+06	6.62967e+06	5.40819e+06	5.76094e+06	6.70584e+06	2.62457e+06	3.83348e+06	3.58535e+06	3.81407e+06	1	Oxidation [P772; P962; K2333; K2446]
High	Master Protein	P16858	glyceraldehyde-3-phosphate dehydrogenase [OS=Mus musculus]	0	763.118	77	22	3263	22	333	35.8	8.25	47948	5330.92	22	21	Pf00044, Pf02800	14433; 100042025; 100042746	ENSMUSG00000057666.18	Gapdh; Gm20899; LOC100042025; Gapdh-ps15; Gm12033	1.62882e+09	1.94143e+09	1.41989e+09	1.49216e+09	1.80301e+09	1.94311e+09	1.42942e+09	1.88193e+09	6.07493e+08	9.12334e+08	9.75074e+08	1.37036e+09	1	Oxidation [P122; P127; K137; K192; K332]
High	Master Protein	P17182	alpha-enolase [OS=Mus musculus]	0	701.142	71	30	1988	26	434	47.1	6.8	37250	3491.35	28	30	Pf00113, Pf03952, Pf13378	13806; 433182	ENSMUSG00000059040.4; ENSMUSG00000063524.13	Eno1; Gm5506; Eno1b	1.0974e+09	1.45194e+09	1.06553e+09	1.03356e+09	1.50255e+09	1.25394e+09	9.63058e+08	1.40744e+09	4.5588e+08	6.31935e+08	8.12584e+08	8.8433e+08	1	Oxidation [K92; K335]
High	Master Protein	P17426	AP-2 complex subunit alpha-1 [OS=Mus musculus]	0	526.143	48	42	1358	30	977	107.6	7.03	15986	1811.18	42	42	Pf01602, Pf02296, Pf02883, Pf13646	11771	ENSMUSG00000060279.14	Ap2a1	2.39716e+08	2.00639e+08	2.48563e+08	2.39016e+08	2.18988e+08	2.26838e+08	2.1037e+08	1.9449e+08	1.06346e+08	1.46139e+08	1.1843e+08	1.59976e+08	1
High	Master Protein	P17563	Selenium-binding protein 1 [OS=Mus musculus]	0	346.965	67	23	517	23	472	52.5	6.29	6469	748.31	23	23	Pf05694, Pf10282	20341	ENSMUSG00000068874.13	Selenbp1	6.53709e+07	9.03929e+07	5.89229e+07	6.77378e+07	8.44883e+07	9.08409e+07	5.73682e+07	8.76224e+07	2.52098e+07	4.14161e+07	4.56917e+07	6.40647e+07	1
High	Master Protein	P17665	Cytochrome c oxidase subunit 7C, mitochondrial [OS=Mus musculus]	0.001	3.355	14	1	32	1	63	7.3	11	33	29.31	1	1	Pf02935	12867; 654359; 102642884	ENSMUSG00000017778.14	Cox7c; Gm12338; LOC100048613; LOC102642884	1.16914e+07	1.6328e+07	7.8768e+06	1.24307e+07	1.75644e+07	2.00422e+07	10260091	15827541	3.37004e+06	7600358	9498889	14134620	1
High	Master Protein	P17751	Triosephosphate isomerase [OS=Mus musculus]	0	313.094	64	17	779	17	299	32.2	5.74	13147	1328.02	17	16	Pf00121	21991	ENSMUSG00000023456.14	Tpi1	3.39645e+08	3.83886e+08	2.89801e+08	3.00795e+08	3.75245e+08	3.60818e+08	2.98066e+08	3.72121e+08	1.2399e+08	1.83911e+08	2.02934e+08	2.54463e+08	1	Oxidation [P217]
High	Master Protein	P17809	Solute carrier family 2, facilitated glucose transporter member 1 [OS=Mus musculus]	0	14.111	4	2	48	2	492	53.9	8.87	539	50.6	2	2	Pf00083, Pf07690, Pf13347	20525	ENSMUSG00000028645.11	Slc2a1	1.97824e+06	2.0582e+06	1.42721e+06	1.63999e+06	2.40987e+06	1.91454e+06	1.73606e+06	1.99512e+06	610624	1.00272e+06	1.30327e+06	1.35021e+06	1
High	Master Protein	P17918	proliferating cell nuclear antigen [OS=Mus musculus]	0	243.909	62	13	619	13	261	28.8	4.77	8359	1025.33	13	13	Pf00705, Pf02747	18538	ENSMUSG00000027342.14	Pcna	1.01049e+08	1.10095e+08	1.14197e+08	1.17011e+08	1.13366e+08	1.14769e+08	88678534	1.0672e+08	4.88587e+07	7.15424e+07	6.13088e+07	8.094e+07	1	Oxidation [K77]
Medium	Master Protein	P18155	Bifunctional methylenetetrahydrofolate dehydrogenase/cyclohydrolase, mitochondrial [OS=Mus musculus]	0.016	1.696	3	1	1	1	350	37.8	8.88	0		1		Pf00763, Pf02882	17768	ENSMUSG00000005667.8	Mthfd2	329657	394678	290153	355981	296979		289300	382581	124140	217653	160608		1
High	Master Protein	P18760	Cofilin-1 [OS=Mus musculus]	0	230.672	66	12	749	10	166	18.5	8.09	11236	1217.25	12	12	Pf00241	12631	ENSMUSG00000056201.7	Cfl1	2.55984e+08	2.49942e+08	2.56909e+08	2.4142e+08	2.10104e+08	2.38845e+08	2.24646e+08	2.42281e+08	1.09917e+08	1.47609e+08	1.13625e+08	1.68443e+08	1	Oxidation [P76; P106; P110; K112]
Medium	Master Protein	P18911-1	Retinoic acid receptor gamma [OS=Mus musculus]	0.015	1.773	2	1	20	1	458	50.9	7.66	0	0	1	1	Pf00104, Pf00105	19411	ENSMUSG00000001288.14	Rarg	55081.9	173194	239258	521027	431883	632091	48338.7	167886	102365	318565	233564	445777	1
High	Master Protein	P19001	Keratin, type I cytoskeletal 19 [OS=Mus musculus]	0	192.389	53	21	502	14	403	44.5	5.39	5774	646.35	21	21	Pf00038	16669	ENSMUSG00000020911.14	Krt19	1.37706e+08	1.35026e+08	4.09302e+08	9.32703e+07	1.04929e+08	9.19783e+07	1.20848e+08	1.30888e+08	1.75118e+08	5.70271e+07	5.67463e+07	6.48669e+07	1
High	Master Protein	P19096	Fatty acid synthase [OS=Mus musculus]	0	956.178	37	71	1770	71	2504	272.3	6.58	20932	2382.3	71	71	Pf00106, Pf00107, Pf00109, Pf00550, Pf00698, Pf00975, Pf02801, Pf08241, Pf08242, Pf08659, Pf12847, Pf13489, Pf13602, Pf13847, Pf14765	14104	ENSMUSG00000025153.9	Fasn	2.93789e+08	2.73901e+08	2.78401e+08	2.66748e+08	2.57088e+08	2.1573e+08	2.57823e+08	2.65506e+08	1.19112e+08	1.63095e+08	1.39035e+08	1.52142e+08	1	Oxidation [P332; P1122; P1259]
High	Master Protein	P19157	Glutathione S-transferase P 1 [OS=Mus musculus]	0	118.591	43	7	238	7	210	23.6	7.87	2922	346.05	7	7	Pf00043, Pf02798	14870	ENSMUSG00000060803.5; ENSMUSG00000097830.3	Gstp1	2.51114e+07	3.73379e+07	2.14853e+07	2.37024e+07	2.96191e+07	3.43716e+07	2.20372e+07	3.61935e+07	9.19234e+06	1.4492e+07	1.60181e+07	2.42403e+07	1
High	Master Protein	P19253	60S ribosomal protein L13a [OS=Mus musculus]	0	73.24	31	7	371	7	203	23.4	11.02	2617	399.82	7	6	Pf00572	22121	ENSMUSG00000074129.13	Rpl13a	1.02475e+08	1.17505e+08	9.9883e+07	1.09224e+08	1.05512e+08	1.25144e+08	89930284	1.13904e+08	4.27344e+07	6.67813e+07	5.70612e+07	8.82565e+07	1
High	Master Protein	P19536	Cytochrome c oxidase subunit 5B, mitochondrial [OS=Mus musculus]	0	24.03	25	4	116	4	128	13.8	8.38	145	55.41	4	4	Pf01215	12859		Cox5b	9.25905e+06	8.26089e+06	6.16821e+06	9.3665e+06	1.08999e+07	8.34515e+06	8.12555e+06	8.0077e+06	2.63903e+06	5.72684e+06	5.8947e+06	5.88535e+06	1
High	Master Protein	P19783	Cytochrome c oxidase subunit 4 isoform 1, mitochondrial [OS=Mus musculus]	0	232.79	57	12	834	12	169	19.5	9.23	8131	1079.12	12	12	Pf02936	12857	ENSMUSG00000031818.12	Cox4i1	1.1164e+08	1.59621e+08	9.26014e+07	1.52084e+08	1.58909e+08	1.70088e+08	9.79731e+07	1.54729e+08	3.9619e+07	9.29866e+07	8.59385e+07	119953332	1	Oxidation [P130]
High	Master Protein	P19973	Lymphocyte-specific protein 1 [OS=Mus musculus]	0	98.05	39	7	69	7	330	36.7	4.82	581	91.37	7	7	Pf02029	16985	ENSMUSG00000018819.10	Lsp1	3.44162e+06	2.24048e+06	2.08823e+06	3.35959e+06	5.08327e+06	3.77509e+06	3.0203e+06	2.17181e+06	893437	2.05412e+06	2.74905e+06	2.66235e+06	1
High	Master Protein	P20060	Beta-hexosaminidase subunit beta [OS=Mus musculus]	0	46.131	14	6	74	6	536	61.1	8.12	342	34.89	6	6	Pf00728, Pf14845	15212	ENSMUSG00000021665.7	Hexb	3.25543e+06	3.72764e+06	2.83207e+06	2.94995e+06	3.00687e+06	3.69979e+06	2.8569e+06	3.61339e+06	1.21169e+06	1.80365e+06	1.62613e+06	2.60925e+06	1
High	Master Protein	P20108	Thioredoxin-dependent peroxide reductase, mitochondrial [OS=Mus musculus]	0	84.015	39	7	180	7	257	28.1	7.58	1024	225.27	7	7	Pf00578, Pf08534, Pf10417, Pf13905	11757	ENSMUSG00000024997.7	Prdx3	2.20958e+07	2.49914e+07	2.34143e+07	1.95112e+07	2.3815e+07	2.49772e+07	1.93908e+07	2.42255e+07	1.00177e+07	1.19295e+07	1.28793e+07	1.7615e+07	1
High	Master Protein	P21107-2	Isoform 2 of Tropomyosin alpha-3 chain [OS=Mus musculus]	0	269.21	57	21	598	5	248	29	4.78	8167	823.88	21	21	Pf00261, Pf12718	59069	ENSMUSG00000027940.18	Tpm3	1.33282e+08	8.53845e+07	1.0209e+08	1.23143e+08	1.25679e+08	7.70316e+07	1.16966e+08	8.27675e+07	4.36788e+07	7.5292e+07	6.79679e+07	5.43259e+07	1
High	Master Protein	P21180-1	complement C2 [OS=Mus musculus]	0.001	3.338	2	2	10	1	760	84.7	7.56	25	0	2	1	Pf00084, Pf00089, Pf00092, Pf09342, Pf13519	12263	ENSMUSG00000024371.14	C2	108484	143082	41891	101323	39269.6	99456	95203.1	138697	17922.8	61950.7	21237.2	70140.5	1
High	Master Protein	P21279	Guanine nucleotide-binding protein G(Q) subunit alpha [OS=Mus musculus]	0	82.957	30	9	102	5	359	42.1	5.68	949	113.98	9	9	Pf00025, Pf00503	14682	ENSMUSG00000024639.5	Gnaq	3.05989e+06	3.43169e+06	3.21859e+06	3.45996e+06	3.70301e+06	3.79595e+06	2.6853e+06	3.32651e+06	1.37705e+06	2.11548e+06	2.00261e+06	2.67706e+06	1
High	Master Protein	P21300	Aldose reductase-related protein 1 [OS=Mus musculus]	0	70.57	30	10	110	5	316	36	7.25	907	127.08	9	10	Pf00248	11997	ENSMUSG00000052131.7	Akr1b7	8.91869e+06	1.51826e+07	9.14525e+06	8.83881e+06	1.30274e+07	1.02464e+07	7.82685e+06	1.47173e+07	3.91274e+06	5.40421e+06	7.04527e+06	7.22617e+06	1
High	Master Protein	P21614	vitamin D-binding protein [OS=Mus musculus]	0	116.124	43	13	208	13	476	53.6	5.5	2273	239.26	13	13	Pf00273, Pf09164	14473	ENSMUSG00000035540.12	Gc	1.81801e+07	2.01113e+07	1.56052e+07	1.62673e+07	1.65531e+07	1.61299e+07	1.59545e+07	1.94949e+07	6.67661e+06	9.94614e+06	8.952e+06	1.13755e+07	1
High	Master Protein	P21956-1	Lactadherin [OS=Mus musculus]	0	32.676	11	4	18	4	463	51.2	6.52	107	14.74	4	4	Pf00008, Pf00754	17304	ENSMUSG00000030605.15	Mfge8	1.17672e+06	935883	1.03028e+06	767269	1.22154e+06	772035	1.03266e+06	907199	440800	469122	660614	544471	1
High	Master Protein	P21981	Protein-glutamine gamma-glutamyltransferase 2 [OS=Mus musculus]	0	16.398	4	2	34	2	686	77	5.1	136	24.94	2	2	Pf00868, Pf00927, Pf01841	21817	ENSMUSG00000037820.15	Tgm2	1.17784e+06	1.05618e+06	1.51606e+06	1.39308e+06	907255	1.76442e+06	1.03365e+06	1.02381e+06	648636	851753	490648	1.24434e+06	1
High	Master Protein	P22599	Alpha-1-antitrypsin 1-2 [OS=Mus musculus]	0	162.597	37	11	245	2	413	45.9	5.54	3703	372.54	11	11	Pf00079	20701	ENSMUSG00000071178.11	Serpina1b	1.1358e+07	6.32269e+06	8.61677e+06	8.65557e+06	5.73808e+06	5.71727e+06	9.96758e+06	6.1289e+06	3.68664e+06	5.29217e+06	3.10318e+06	4.03206e+06	1
High	Master Protein	P22682	E3 ubiquitin-protein ligase CBL [OS=Mus musculus]	0	6.942	2	1	10	1	913	100.5	6.67	50	3.57	1	1	Pf00097, Pf00627, Pf02262, Pf02761, Pf02762, Pf13639, Pf13920, Pf13923, Pf14447, Pf14570, Pf14634, Pf15227	12402	ENSMUSG00000034342.9	Cbl	272709	208879	300420	338558	238831	303564	239324	202477	128533	207001	129161	214086	1
High	Master Protein	P22935	Cellular retinoic acid-binding protein 2 [OS=Mus musculus]	0	12.075	12	1	20	1	138	15.7	5.71	81	16.01	1	1	Pf00061, Pf14651	12904	ENSMUSG00000004885.5	Crabp2	425604	387819	390504	313441	336166	382348	373501	375933	167075	191644	181800	269648	1
High	Master Protein	P23116	Eukaryotic translation initiation factor 3 subunit A [OS=Mus musculus]	0	533.13	39	55	1260	55	1344	161.8	6.77	10488	1506.01	55	53	Pf01399	13669	ENSMUSG00000024991.7	Eif3a	2.02236e+08	1.9943e+08	2.19113e+08	2.01294e+08	1.94303e+08	1.79761e+08	1.77478e+08	1.93317e+08	9.37463e+07	1.23075e+08	1.0508e+08	1.26775e+08	1	Oxidation [P269; K720]
Medium	Master Protein	P23359	bone morphogenetic protein 7 [OS=Mus musculus]	0.037	1.089	2	1	17	1	430	49.2	7.49	242		1		Pf00019, Pf00688	12162	ENSMUSG00000008999.7	Bmp7	3.69011e+06	4.58621e+06	3.40747e+06	3.06568e+06	4.44838e+06	3.79576e+06	3.23837e+06	4445642	1.45787e+06	1.87441e+06	2405705	2.67692e+06	1
High	Master Protein	P23591	GDP-L-fucose synthase [OS=Mus musculus]	0	4.568	4	2	30	2	321	35.9	6.74	147	21.73	2	2	Pf01073, Pf01370, Pf02719, Pf04321	22122	ENSMUSG00000022570.5	Tsta3	2.32265e+06	1.17394e+06	2.26138e+06	2.57369e+06	2.64964e+06	2.54123e+06	2.03831e+06	1.13796e+06	967519	1.5736e+06	1.43293e+06	1.79218e+06	1
High	Master Protein	P24369	peptidyl-prolyl cis-trans isomerase B [OS=Mus musculus]	0	302.873	62	16	1242	16	216	23.7	9.55	14280	1618.41	16	16	Pf00160	19035	ENSMUSG00000032383.7	Ppib	2.72567e+08	2.78071e+08	2.768e+08	2.82889e+08	2.78018e+08	3.83761e+08	2.39199e+08	2.69548e+08	1.18427e+08	1.72963e+08	1.50354e+08	2.70644e+08	1	Oxidation [K98; P135]
High	Master Protein	P24472	Glutathione S-transferase A4 [OS=Mus musculus]	0	59.604	36	7	252	6	222	25.5	7.39	2442	235.38	7	7	Pf00043, Pf02798, Pf14497	14860	ENSMUSG00000032348.6	Gsta4	1.90825e+07	2.57855e+07	1.71613e+07	1.70874e+07	2.14309e+07	2.15631e+07	1.67464e+07	2.49952e+07	7.34234e+06	1.04475e+07	1.15899e+07	1.52072e+07	1
High	Master Protein	P24527	leukotriene A-4 hydrolase [OS=Mus musculus]	0	266.616	41	20	354	20	611	69	6.42	3511	433.1	20	20	Pf01433, Pf09127, Pf13485	16993	ENSMUSG00000015889.8	Lta4h	3.09836e+07	3.94732e+07	2.9836e+07	3.26445e+07	3.69793e+07	3.64077e+07	2.71906e+07	3.82633e+07	1.27652e+07	1.99594e+07	1.99986e+07	2.56762e+07	1	Oxidation [P86]
High	Master Protein	P25206	DNA replication licensing factor mcm3 [OS=Mus musculus]	0	293.112	41	28	538	28	812	91.5	5.55	6094	790.47	28	27	Pf00493, Pf01078, Pf07728, Pf14551	17215	ENSMUSG00000041859.10	Mcm3	7.57667e+07	7.77031e+07	1.21901e+08	9.81864e+07	1.04197e+08	7.59961e+07	6.64913e+07	7.53216e+07	5.21548e+07	6.00329e+07	5.63504e+07	5.35956e+07	1	Oxidation [P704; P715]
High	Master Protein	P25799	Nuclear factor NF-kappa-B p105 subunit [OS=Mus musculus]	0	9.832	5	4	18	4	971	105.5	5.39	74	5.03	4	4	Pf00023, Pf00531, Pf00554, Pf12796, Pf13637, Pf13857	18033	ENSMUSG00000028163.17	Nfkb1	649672	843936	705220	792981	864020	783439	570139	818070	301724	484843	467266	552514	1
High	Master Protein	P26039	Talin-1 [OS=Mus musculus]	0	1404.38	47	91	2582	79	2541	269.7	6.18	43646	3901.98	91	91	Pf00373, Pf01608, Pf02174, Pf08913, Pf09141, Pf09379	21894	ENSMUSG00000028465.16	Tln1	4.06267e+08	4.21653e+08	4.00998e+08	3.94381e+08	4.36606e+08	3.58896e+08	3.56532e+08	4.08729e+08	1.71565e+08	2.41132e+08	2.36118e+08	2.53108e+08	1	Oxidation [P1009]
High	Master Protein	P26041	Moesin [OS=Mus musculus]	0	650.161	63	38	1621	26	577	67.7	6.6	18671	2109.55	38	37	Pf00373, Pf00769, Pf09379, Pf09380	17698	ENSMUSG00000031207.16	Msn	4.16561e+08	4.66086e+08	3.80816e+08	4.14484e+08	4.53081e+08	4.30702e+08	3.65566e+08	4.51801e+08	1.6293e+08	2.53423e+08	2.45029e+08	3.03748e+08	1	Oxidation [P470; P475]
High	Master Protein	P26043	radixin [OS=Mus musculus]	0	497.204	43	30	1221	17	583	68.5	6.2	13625	1469.4	30	30	Pf00373, Pf00769, Pf09379, Pf09380	19684	ENSMUSG00000032050.17	Rdx	5.86355e+07	6.73725e+07	5.9584e+07	6.02757e+07	6.63803e+07	6.44695e+07	5.14573e+07	6.53076e+07	2.54927e+07	3.68536e+07	3.58988e+07	4.54665e+07	1
High	Master Protein	P26369	Splicing factor U2AF 65 kDa subunit [OS=Mus musculus]	0	216.612	34	12	387	12	475	53.5	9.09	5245	692.08	12	12	Pf00076, Pf13893, Pf14259	22185	ENSMUSG00000030435.16	U2af2	6.14349e+07	5.24383e+07	6.94837e+07	6.53794e+07	5.36305e+07	5.61293e+07	5.3914e+07	5.08311e+07	2.97282e+07	3.99741e+07	2.90036e+07	3.95847e+07	1	Oxidation [P97; P104; P236; P242]
High	Master Protein	P26443	Glutamate dehydrogenase 1, mitochondrial [OS=Mus musculus]	0	554.735	54	28	1823	28	558	61.3	8	24151	2813.07	28	28	Pf00208, Pf02812	14661	ENSMUSG00000021794.15	Glud1	2.75738e+08	3.70714e+08	2.60559e+08	2.94427e+08	3.52189e+08	3.92246e+08	2.41982e+08	3.59352e+08	1.11479e+08	1.80018e+08	1.90465e+08	2.76628e+08	1
High	Master Protein	P26450	Phosphatidylinositol 3-kinase regulatory subunit alpha [OS=Mus musculus]	0	10.405	3	2	9	1	724	83.5	6.28	93	5.73	2	2	Pf00017, Pf00018, Pf00620, Pf07653	18708	ENSMUSG00000041417.15	Pik3r1	163328		209476		262430	199328	143333		89622.9		141923	140574	1
High	Master Protein	P26516	26S proteasome non-ATPase regulatory subunit 7 [OS=Mus musculus]	0	125.521	36	8	195	8	321	36.5	6.77	3187	369.59	8	7	Pf01398, Pf13012	17463	ENSMUSG00000039067.5	Psmd7	2.52834e+07	2.87952e+07	2.51949e+07	2.72924e+07	2.7534e+07	2.9262e+07	2.21882e+07	2.79126e+07	1.07795e+07	1.66871e+07	1.48905e+07	2.06368e+07	1
High	Master Protein	P26883	Peptidyl-prolyl cis-trans isomerase FKBP1A [OS=Mus musculus]	0	53.221	41	3	69	3	108	11.9	8.16	1200	31.73	3	2	Pf00254	14225	ENSMUSG00000032966.14	Fkbp1a	6.82701e+06	8.68607e+06	5.78426e+06	7.44042e+06	8.87189e+06	1.00738e+07	5.99124e+06	8.41985e+06	2.47476e+06	4.54921e+06	4.79796e+06	7.10443e+06	1
High	Master Protein	P27046	Alpha-mannosidase 2 [OS=Mus musculus]	0	92.271	11	9	106	9	1150	131.5	8.03	1132	114.37	9	9	Pf01074, Pf03065, Pf07748, Pf09261	17158	ENSMUSG00000024085.13	Man2a1	4.18591e+06	5.85157e+06	3.67872e+06	4.35509e+06	4.75017e+06	5.16135e+06	3.67347e+06	5.67222e+06	1.57392e+06	2.66278e+06	2.56891e+06	3.64e+06	1	Oxidation [P919]
High	Master Protein	P27048	small nuclear ribonucleoprotein-associated protein B [OS=Mus musculus]	0	132.806	28	8	536	8	231	23.6	10.9	6925	847.13	8	8	Pf01423	20638	ENSMUSG00000027404.15	Snrpb	1.27847e+08	1.13472e+08	1.29882e+08	1.42441e+08	1.25885e+08	1.27477e+08	1.12196e+08	1.09994e+08	5.55694e+07	8.70911e+07	6.80791e+07	8.99019e+07	1
High	Master Protein	P27546-1	Microtubule-associated protein 4 [OS=Mus musculus]	0	100.504	16	12	111	12	1125	117.4	4.98	768	119.94	12	12	Pf00418	17758	ENSMUSG00000032479.15	Map4; Mtap4	6.48134e+06	5.19909e+06	9.27789e+06	5.87727e+06	6.61644e+06	6.80221e+06	5.68789e+06	5.03974e+06	3.96949e+06	3.59347e+06	3.5782e+06	4.7972e+06	1
High	Master Protein	P27601	Guanine nucleotide-binding protein subunit alpha-13 [OS=Mus musculus]	0	36.561	14	5	40	4	377	44	8.21	453	29.3	5	5	Pf00025, Pf00503	14674	ENSMUSG00000020611.14	Gna13	958587	1.48458e+06	844679	864591	1.20474e+06	1.68848e+06	841236	1.43908e+06	361391	528627	651528	1.19078e+06	1
High	Master Protein	P27612	Phospholipase A-2-activating protein [OS=Mus musculus]	0	119.623	15	9	128	9	794	87.2	6.14	1023	150.87	9	9	Pf00400, Pf08324, Pf09070	18786	ENSMUSG00000028577.13	Plaa	8.00167e+06	8.98913e+06	8.17614e+06	9.16018e+06	7.12025e+06	6.95865e+06	7.0221e+06	8.71362e+06	3.49811e+06	5.6007e+06	3.85067e+06	4.90752e+06	1
High	Master Protein	P27641	X-ray repair cross-complementing protein 5 [OS=Mus musculus]	0	61.611	14	10	126	10	732	83	5.16	812	120.32	10	9	Pf02735, Pf03730, Pf03731, Pf08785	22596	ENSMUSG00000026187.8	Xrcc5	9.89694e+06	1.19833e+07	1.25342e+07	1.20289e+07	1.18558e+07	1.16903e+07	8.68535e+06	1.1616e+07	5.36268e+06	7.35468e+06	6.41166e+06	8.24447e+06	1
High	Master Protein	P27773	Protein disulfide-isomerase A3 [OS=Mus musculus]	0	647.419	66	35	2002	35	505	56.6	6.21	28471	3251.46	35	35	Pf00085, Pf13098, Pf13848, Pf13899, Pf13905	14827	ENSMUSG00000027248.13	Pdia3	5.63618e+08	6.20712e+08	5.89679e+08	6.71386e+08	6.18399e+08	6.74019e+08	4.94619e+08	6.01688e+08	2.52291e+08	4.10497e+08	3.34433e+08	4.75346e+08	1	Oxidation [P245; K252]
High	Master Protein	P27889	Hepatocyte nuclear factor 1-beta [OS=Mus musculus]	0	36.886	12	5	58	4	558	61.5	7.75	345	44.61	5	5	Pf00046, Pf04812, Pf04814, Pf09770	21410	ENSMUSG00000020679.11	Hnf1b	1.63403e+06	1.51434e+06	1.84501e+06	2.09513e+06	1.71325e+06	2.47149e+06	1.43399e+06	1.46793e+06	789378	1.281e+06	926531	1.743e+06	1
High	Master Protein	P28028-1	serine/threonine-protein kinase B-raf [OS=Mus musculus]	0	15.711	4	4	13	2	804	88.7	7.65	47	6.43	4	3	Pf00069, Pf00130, Pf02196, Pf07714, Pf14531	109880	ENSMUSG00000002413.15	Braf	6.67771e+06	3.46504e+06	2.91109e+06	3.82434e+06	2.91605e+06	3.04321e+06	5.86022e+06	3.35883e+06	1.24549e+06	2.33827e+06	1.57701e+06	2.1462e+06	1
High	Master Protein	P28352	DNA-(apurinic or apyrimidinic site) lyase [OS=Mus musculus]	0	141.072	47	10	250	10	317	35.5	7.91	4980	442.65	10	10	Pf03372, Pf14529	11792	ENSMUSG00000035960.13	Apex1	3.452e+07	3.44724e+07	3.97479e+07	3.58811e+07	3.60981e+07	3.12329e+07	3.0294e+07	3.34158e+07	1.70059e+07	2.19384e+07	1.9522e+07	2.20267e+07	1
High	Master Protein	P28474	alcohol dehydrogenase class-3 [OS=Mus musculus]	0	217.192	53	15	421	15	374	39.5	7.25	6779	696.9	15	15	Pf00107, Pf08240	11532	ENSMUSG00000028138.8	Adh5	6.02435e+07	7.88053e+07	6.19143e+07	6.06648e+07	7.59167e+07	7.62898e+07	5.28684e+07	7.639e+07	2.64897e+07	3.70915e+07	4.10561e+07	5.38027e+07	1
High	Master Protein	P28654	decorin [OS=Mus musculus]	0	40.926	12	4	80	4	354	39.8	8.68	294	84.95	4	4	Pf01462, Pf12799, Pf13306, Pf13855	13179	ENSMUSG00000019929.16	Dcn	4.84817e+06	3.63039e+06	4.33065e+06	4.90266e+06	4.24371e+06	3.41354e+06	4.25466e+06	3.51912e+06	1.85284e+06	2.99757e+06	2.29502e+06	2.40737e+06	1
High	Master Protein	P28658	Ataxin-10 [OS=Mus musculus]	0	136.886	36	14	230	14	475	53.7	5.25	3080	258.12	14	14	Pf09759	54138	ENSMUSG00000016541.9	Atxn10	1.4522e+07	1.81722e+07	1.60145e+07	1.83672e+07	1.89612e+07	1.67013e+07	1.27442e+07	1.76152e+07	6.8517e+06	1.123e+07	1.02543e+07	1.17784e+07	1
High	Master Protein	P28659-1	CUGBP Elav-like family member 1 [OS=Mus musculus]	0	163.876	23	11	279	9	486	52.1	8.46	2928	348.79	11	11	Pf00076, Pf13893, Pf14259	13046	ENSMUSG00000005506.16; ENSMUSG00000110883.1	Celf1	2.68516e+07	2.48515e+07	3.06523e+07	3.11061e+07	2.58849e+07	2.55277e+07	2.35644e+07	2.40898e+07	1.31144e+07	1.90188e+07	1.39987e+07	1.80032e+07	1	Oxidation [P86; P91; P180]
High	Master Protein	P28660	Nck-associated protein 1 [OS=Mus musculus]	0	139.881	16	16	182	16	1128	128.7	6.62	1386	191.51	16	15	Pf09735	50884	ENSMUSG00000027002.13	Nckap1	2.41716e+07	2.08585e+07	2.09105e+07	2.30918e+07	1.99123e+07	1.82955e+07	2.12125e+07	2.02192e+07	8.94645e+06	1.41188e+07	1.07687e+07	1.29027e+07	1
High	Master Protein	P28667	MARCKS-related protein [OS=Mus musculus]	0	15.324	11	2	46	2	200	20.2	4.61	409	43.71	2	2		17357	ENSMUSG00000047945.6	Marcksl1	1.03858e+06	495532	1.36066e+06	882984	779602	716242	911435	480344	582149	539873	421612	505123	1
High	Master Protein	P28740	Kinesin-like protein KIF2A [OS=Mus musculus]	0	91.644	17	11	117	11	705	79.7	6.73	939	123.86	11	11	Pf00225	16563	ENSMUSG00000021693.19	Kif2a	5.31238e+06	6.00971e+06	5.93707e+06	6.02221e+06	5.28431e+06	5.74499e+06	4.66203e+06	5.82551e+06	2.54014e+06	3.68208e+06	2.85778e+06	4.05161e+06	1
High	Master Protein	P28741	kinesin-like protein KIF3A [OS=Mus musculus]	0	6.166	2	1	6	1	701	80.1	6.54	42	1.91	1	1	Pf00225, Pf03938	16568	ENSMUSG00000018395.19	Kif3a	229199	286401	249560	359427	457843	307457	201140	277623	106773	219760	247604	216831	1
High	Master Protein	P28825	Meprin A subunit alpha [OS=Mus musculus]	0	75.35	12	7	83	7	747	84.2	6.24	544	77.6	7	7	Pf00008, Pf00629, Pf00917, Pf01400	17287	ENSMUSG00000023914.16	Mep1a	3.65415e+06	9.70697e+06	2.99651e+06	4.27612e+06	8.26013e+06	6.32457e+06	3.20681e+06	9.40945e+06	1.28204e+06	2.61449e+06	4.46712e+06	4.46035e+06	1
High	Master Protein	P28843	Dipeptidyl peptidase 4 [OS=Mus musculus]	0	265.955	36	25	622	25	760	87.4	6.42	6512	874.54	25	25	Pf00326, Pf00930, Pf01738, Pf12695, Pf12697	13482	ENSMUSG00000035000.8	Dpp4	8.05798e+07	8.97228e+07	7.21779e+07	8.69109e+07	8.84933e+07	9.48662e+07	7.07151e+07	8.69728e+07	3.08809e+07	5.31389e+07	4.78576e+07	6.69035e+07	1
High	Master Protein	P29341	Polyadenylate-binding protein 1 [OS=Mus musculus]	0	519.408	53	33	1419	19	636	70.6	9.5	21656	2064.29	33	33	Pf00076, Pf00658, Pf13893, Pf14259	18458	ENSMUSG00000022283.14	Pabpc1	2.35941e+08	2.34089e+08	2.81882e+08	2.7748e+08	2.45306e+08	2.4992e+08	2.07057e+08	2.26915e+08	1.20601e+08	1.69656e+08	1.32663e+08	1.76254e+08	1	Oxidation [P528; P535; P544]
High	Master Protein	P29351	tyrosine-protein phosphatase non-receptor type 6 [OS=Mus musculus]	0	6.098	2	1	6	1	595	67.5	7.81	16	6.48	1	1	Pf00017, Pf00102, Pf00782, Pf14566	15170	ENSMUSG00000004266.15	Ptpn6	139459	221771	121496	195597	228124	187198	122386	214974	51981.4	119592	123370	132020	1
High	Master Protein	P29595	NEDD8 [OS=Mus musculus]	0	7.109	17	1	2	1	81	9	7.25	33	3	1	1	Pf00240, Pf11976	18002	ENSMUSG00000010376.14	Nedd8	135527	231766	218588	275018	345214	426086	118936	224663	93521.6	168151	186694	300493	1
High	Master Protein	P29758	Ornithine aminotransferase, mitochondrial [OS=Mus musculus]	0	269.337	44	16	369	16	439	48.3	6.62	4672	544.25	16	16	Pf00202	18242	ENSMUSG00000030934.9	Oat	3.64739e+07	4.79042e+07	3.97672e+07	4.43835e+07	4.72823e+07	4.81087e+07	3.20088e+07	4.6436e+07	1.70141e+07	2.71369e+07	2.55705e+07	3.39282e+07	1	Oxidation [P138]
High	Master Protein	P29788	Vitronectin [OS=Mus musculus]	0	15.2	4	1	24	1	478	54.8	5.88	171	30.47	1	1	Pf00045, Pf01033	22370	ENSMUSG00000017344.4	Vtn	600772	644022	468548	527616	670303	526062	527226	624284	200465	322594	362503	371001	1
High	Master Protein	P30275	Creatine kinase U-type, mitochondrial [OS=Mus musculus]	0	11.37	6	2	33	2	418	47	8.16	317	25.3	2	2	Pf00217, Pf02807	12716	ENSMUSG00000000308.14	Ckmt1	1.28375e+06	1.99181e+06	1.41963e+06	1.77604e+06	2.78443e+06	2.59019e+06	1.12659e+06	1.93077e+06	607380	1.0859e+06	1.50583e+06	1.82671e+06	1
High	Master Protein	P30412	peptidyl-prolyl cis-trans isomerase C [OS=Mus musculus]	0	119.234	34	5	215	5	212	22.8	7.5	2542	257.42	5	5	Pf00160	19038	ENSMUSG00000024538.7	Ppic	2.08946e+07	2.16641e+07	2.53602e+07	1.90502e+07	3.20813e+07	3.43088e+07	1.83367e+07	2.10001e+07	1.08502e+07	1.16477e+07	1.73497e+07	2.4196e+07	1	Oxidation [K92]
High	Master Protein	P30416	Peptidyl-prolyl cis-trans isomerase FKBP4 [OS=Mus musculus]	0	361.79	64	26	948	26	458	51.5	5.72	10530	1347.26	26	24	Pf00254, Pf00515, Pf07719, Pf13414, Pf13424, Pf13432, Pf14559	14228	ENSMUSG00000030357.10	Fkbp4	1.23009e+08	1.27127e+08	1.17066e+08	1.29194e+08	1.23467e+08	1.4283e+08	1.0795e+08	1.23231e+08	5.00859e+07	7.89918e+07	6.67717e+07	1.00729e+08	1	Oxidation [K7; P47]
High	Master Protein	P31361	POU domain, class 3, transcription factor 3 [OS=Mus musculus]	0	11.86	3	1	2	1	497	50.2	7.87	83	2.3	1	1	Pf00046, Pf00157	18993	ENSMUSG00000045515.3	Pou3f3	187506	229370	198350	279462	239333	251208	164551	222340	84862.9	170868	129432	177163	1
High	Master Protein	P31428	dipeptidase 1 [OS=Mus musculus]	0	25.918	10	3	20	3	410	45.7	6.37	255	26.92	3	3	Pf01244	13479	ENSMUSG00000019278.5	Dpep1	596391	1.90241e+06	471489	1.4386e+06	1.34562e+06	2.33048e+06	523381	1.84411e+06	201724	879584	727720	1.64355e+06	1
High	Master Protein	P31786	acyl-CoA-binding protein [OS=Mus musculus]	0	22.835	32	2	27	2	87	10	8.82	102	30.28	2	2	Pf00887	13167	ENSMUSG00000026385.16	Dbi	1.81746e+06	2.56076e+06	804573	779627	2.75926e+06	2.48691e+06	1.59496e+06	2.48227e+06	344232	476678	1.49222e+06	1.75387e+06	1
High	Master Protein	P31938	Dual specificity mitogen-activated protein kinase kinase 1 [OS=Mus musculus]	0	36.938	14	6	61	2	393	43.4	6.7	424	59.02	6	6	Pf00069, Pf07714	26395	ENSMUSG00000004936.8	Map2k1	1.78923e+06	2.44457e+06	2.18335e+06	1.56634e+06	2.09147e+06	1.83981e+06	1.57019e+06	2.36964e+06	934132	957688	1.13108e+06	1.29751e+06	1
High	Master Protein	P32020	Non-specific lipid-transfer protein [OS=Mus musculus]	0	34.049	7	4	67	4	547	59.1	7.44	389	61.58	4	4	Pf00108, Pf00109, Pf02036, Pf02801, Pf02803, Pf08545, Pf14864	20280	ENSMUSG00000028603.15	Scp2	6.59497e+06	9.7386e+06	6.4529e+06	7.85479e+06	9.69073e+06	1.19874e+07	5787612	9.44012e+06	2.76084e+06	4.80256e+06	5.24079e+06	8.45402e+06	1
High	Master Protein	P32067	Lupus La protein homolog [OS=Mus musculus]	0	269.353	44	19	567	19	415	47.7	9.77	6181	897.97	19	19	Pf00076, Pf05383, Pf08777, Pf14259	20823	ENSMUSG00000068882.13	Ssb	1.38223e+08	1.09608e+08	1.33883e+08	1.2709e+08	1.04811e+08	1.23398e+08	1.21301e+08	1.06248e+08	5.72811e+07	7.77051e+07	5.66821e+07	8.70253e+07	1
High	Master Protein	P32233	developmentally-regulated GTP-binding protein 1 [OS=Mus musculus]	0	100.309	33	10	148	10	367	40.5	8.9	1333	167.64	10	10	Pf00009, Pf01926, Pf02421, Pf02824	13494	ENSMUSG00000020457.13	Drg1	1.84674e+07	1.80554e+07	2.29029e+07	2.19742e+07	1.94212e+07	2.05389e+07	1.62066e+07	1.7502e+07	9.79887e+06	1.34354e+07	1.05031e+07	1.44849e+07	1
High	Master Protein	P32261	Antithrombin-III [OS=Mus musculus]	0	71.216	14	5	161	5	465	52	6.46	414	116.63	5	5	Pf00079	11905	ENSMUSG00000026715.12	Serpinc1	6.291e+06	6.84609e+06	4.90136e+06	5.98378e+06	5.76783e+06	5.429e+06	5.52085e+06	6.63626e+06	2.09702e+06	3.65859e+06	3.11927e+06	3.82875e+06	1
High	Master Protein	P33174	Chromosome-associated kinesin KIF4 [OS=Mus musculus]	0	11.508	3	4	16	4	1231	139.4	6.68	24	6.94	4	4	Pf00225, Pf05033, Pf06156, Pf12128	16571	ENSMUSG00000034311.3	Kif4	1.76598e+06	1.65319e+06	1.9543e+06	2.00427e+06	1.67237e+06	1.27431e+06	1.54979e+06	1.60252e+06	836135	1.22545e+06	904427	898693	1
High	Master Protein	P33609	DNA polymerase alpha catalytic subunit [OS=Mus musculus]	0	7.721	2	3	16	3	1465	167.2	5.74	27	0	3	3	Pf00136, Pf03104, Pf08996, Pf12254	18968	ENSMUSG00000006678.6	Pola1	858680	1.01291e+06	1.0008e+06	989771	949725	982813	753560	981864	428186	605164	513615	693120	1
High	Master Protein	P34022	Ran-specific GTPase-activating protein [OS=Mus musculus]	0	52.31	42	5	56	5	203	23.6	5.22	236	64.68	5	5	Pf00638	19385	ENSMUSG00000005732.14; ENSMUSG00000099164.8	Ranbp1	2.01427e+07	2.10465e+07	1.67545e+07	1.63826e+07	1.81359e+07	1.64202e+07	1.76768e+07	2.04014e+07	7.16832e+06	1.00166e+07	9.80798e+06	1.15802e+07	1
High	Master Protein	P34884	Macrophage Migration inhibitory factor [OS=Mus musculus]	0	30.027	23	3	50	3	115	12.5	7.34	693	39.32	3	2	Pf01187	17319	ENSMUSG00000033307.7	Mif	1.72087e+07	2.02348e+07	1.35702e+07	1.77589e+07	2.81381e+07	2.74342e+07	1.5102e+07	1.96146e+07	5.80593e+06	1.08581e+07	1.52172e+07	1.93477e+07	1
High	Master Protein	P34914	Bifunctional epoxide hydrolase 2 [OS=Mus musculus]	0	31.092	10	5	31	5	554	62.5	6.19	330	25.8	5	5	Pf00561, Pf00702, Pf12146, Pf12695, Pf12697, Pf13242, Pf13419	13850	ENSMUSG00000022040.7	Ephx2	1.74301e+06	1.97034e+06	1.77978e+06	1.81239e+06	1.90686e+06	2.09449e+06	1.52963e+06	1.90995e+06	761467	1.10813e+06	1.03124e+06	1.47712e+06	1
High	Master Protein	P35235	tyrosine-protein phosphatase non-receptor type 11 [OS=Mus musculus]	0	52.16	17	8	75	8	597	68.4	7.3	304	70.2	8	8	Pf00017, Pf00102, Pf00782	19247	ENSMUSG00000043733.14	Ptpn11	2.95846e+06	5.82463e+06	2.64543e+06	5.52677e+06	5.59581e+06	5.72474e+06	2.59629e+06	5.6461e+06	1.13183e+06	3.37917e+06	3.02624e+06	4.03732e+06	1
High	Master Protein	P35278	Ras-related protein Rab-5C [OS=Mus musculus]	0	142.05	48	8	337	5	216	23.4	8.41	4637	480.55	8	7	Pf00009, Pf00025, Pf00071, Pf04670, Pf08477	19345	ENSMUSG00000019173.11	Rab5c	3.61818e+07	4.79592e+07	3.992e+07	3.92512e+07	4.56069e+07	4.97653e+07	3.17524e+07	4.64893e+07	1.70795e+07	2.39989e+07	2.46644e+07	3.50965e+07	1	Oxidation [K135]
High	Master Protein	P35279	Ras-related protein Rab-6A [OS=Mus musculus]	0	65.416	35	7	214	6	208	23.6	5.54	1515	203	6	7	Pf00025, Pf00071, Pf02421, Pf04670, Pf08477, Pf09439	19346	ENSMUSG00000030704.14	Rab6a	1.2704e+07	1.49857e+07	1.48807e+07	1.54644e+07	1.56343e+07	1.78635e+07	1.11488e+07	1.45264e+07	6.36661e+06	9.4552e+06	8.4551e+06	1.25981e+07	1
High	Master Protein	P35282	Ras-related protein Rab-21 [OS=Mus musculus]	0	50.295	22	4	96	4	222	24.1	7.94	1300	130.16	4	4	Pf00025, Pf00071, Pf08477	216344	ENSMUSG00000020132.10	Rab21	3.75479e+06	5.56229e+06	3.26066e+06	3.66989e+06	4.04963e+06	5.0505e+06	3.29513e+06	5.39181e+06	1.39505e+06	2.24384e+06	2.19006e+06	3.56182e+06	1
High	Master Protein	P35290	Ras-related protein Rab-24 [OS=Mus musculus]	0	8.859	7	1	4	1	203	23.1	6.23	50	4.38	1	1	Pf00025, Pf00071, Pf08477	19336	ENSMUSG00000034789.7	Rab24	158374	282798	201377	249333	202264	270318	138986	274131	86158.1	152446	109386	190639	1
High	Master Protein	P35293	Ras-related protein Rab-18 [OS=Mus musculus]	0	70.594	41	7	153	7	206	23	5.36	1728	186.68	7	7	Pf00025, Pf00071, Pf04670, Pf08477, Pf09439	19330	ENSMUSG00000073639.5	Rab18	8.81473e+06	1.14699e+07	1.08241e+07	1.23993e+07	1.29272e+07	1.40821e+07	7.73562e+06	1.11184e+07	4.63103e+06	7.58117e+06	6.99108e+06	9.9313e+06	1
High	Master Protein	P35330	Intercellular adhesion molecule 2 [OS=Mus musculus]	0	12.772	8	2	18	2	277	31.4	7.91	304	22.41	2	2	Pf03921	15896	ENSMUSG00000001029.15	Icam2	554868	1.1211e+06	1.07889e+06	842975	1.31273e+06	1.41114e+06	486941	1.08674e+06	461598	515410	709929	995196	1
High	Master Protein	P35486	Pyruvate dehydrogenase E1 component subunit alpha, somatic form, mitochondrial [OS=Mus musculus]	0	179.207	48	16	370	16	390	43.2	8.19	5095	493.13	16	16	Pf00676	18597	ENSMUSG00000031299.10	Pdha1	4.8761e+07	6.42892e+07	5.25938e+07	5.92155e+07	5.797e+07	6.54761e+07	4.27916e+07	6.23187e+07	2.25019e+07	3.62054e+07	3.13505e+07	4.61764e+07	1
High	Master Protein	P35505	Fumarylacetoacetase [OS=Mus musculus]	0	96.297	29	9	122	9	419	46.1	7.18	1696	160.47	9	9	Pf01557, Pf09298	14085	ENSMUSG00000030630.16	Fah	1.09972e+07	1.86442e+07	6.55561e+06	9.2448e+06	1.69514e+07	1.51157e+07	9.65089e+06	1.80727e+07	2.80478e+06	5.65243e+06	9.16739e+06	1.06602e+07	1
High	Master Protein	P35585	AP-1 complex subunit mu-1 [OS=Mus musculus]	0	101.278	28	10	267	8	423	48.5	7.3	1911	297.85	10	10	Pf00928	11767	ENSMUSG00000003033.15	Ap1m1	1.45834e+07	1.72159e+07	1.48659e+07	1.48042e+07	1.71908e+07	1.4831e+07	1.27981e+07	1.66883e+07	6.36031e+06	9.05155e+06	9.29684e+06	1.04594e+07	1
High	Master Protein	P35700	peroxiredoxin-1 [OS=Mus musculus]	0	432.869	79	21	1440	19	199	22.2	8.12	12466	1929.79	21	21	Pf00578, Pf08534, Pf10417	18477	ENSMUSG00000028691.12	Prdx1	4.36311e+08	5.62515e+08	4.15015e+08	4.65471e+08	5.23663e+08	6.19791e+08	3.82897e+08	5.45274e+08	1.77562e+08	2.84597e+08	2.83199e+08	4.37102e+08	1	Oxidation [P91; K92; P99; P174; K178]
High	Master Protein	P35802	Neuronal membrane glycoprotein M6-a [OS=Mus musculus]	0	26.408	13	5	82	5	278	31.1	5.27	332	49.37	5	5	Pf01275	234267	ENSMUSG00000031517.8	Gpm6a	3.0109e+06	5.01994e+06	2.92467e+06	3.6782e+06	4.59564e+06	5.68139e+06	2.64231e+06	4.86608e+06	1.2513e+06	2.24892e+06	2.48534e+06	4.00675e+06	1
High	Master Protein	P35979	60S ribosomal protein L12 [OS=Mus musculus]	0	136.073	59	7	500	7	165	17.8	9.42	10328	850.24	7	7	Pf00298, Pf03946	269261	ENSMUSG00000038900.17	Rpl12	2.04575e+08	2.03494e+08	2.56746e+08	2.56491e+08	2.34795e+08	2.78055e+08	1.79531e+08	1.97257e+08	1.09847e+08	156823409	1.26978e+08	1.96096e+08	1
High	Master Protein	P36552	Oxygen-dependent coproporphyrinogen-III oxidase, mitochondrial [OS=Mus musculus]	0	130.661	39	13	115	13	443	49.7	8.53	1230	163.89	13	13	Pf01218	12892	ENSMUSG00000022742.5	Cpox	1.90173e+07	2.18024e+07	1.77691e+07	1.82791e+07	1.89845e+07	2.4995e+07	1.66892e+07	2.11342e+07	7.60241e+06	1.11762e+07	1.02669e+07	1.76275e+07	1	Oxidation [P244]
High	Master Protein	P36916	Guanine nucleotide-binding protein-like 1 [OS=Mus musculus]	0	21.139	7	4	39	4	607	68.7	5.68	156	13.29	4	4	Pf01926, Pf02421	14670	ENSMUSG00000024429.9	Gnl1	1.94183e+06	2.49143e+06	1.84218e+06	2.3318e+06	2.2025e+06	2.50526e+06	1.70411e+06	2.41507e+06	788166	1.4257e+06	1.19112e+06	1.76681e+06	1
High	Master Protein	P37040	NADPH--cytochrome P450 reductase [OS=Mus musculus]	0	104.686	21	13	256	13	678	77	5.53	1384	256.37	13	13	Pf00175, Pf00258, Pf00667	18984	ENSMUSG00000005514.14	Por	2.83282e+07	3.17488e+07	2.66054e+07	3.07858e+07	2.93923e+07	3.01834e+07	2.48603e+07	3.07757e+07	1.1383e+07	1.8823e+07	1.58955e+07	2.12866e+07	1
High	Master Protein	P37804	transgelin [OS=Mus musculus]	0	78.042	56	9	151	9	201	22.6	8.81	1241	176.43	9	9	Pf00307, Pf00402	21345	ENSMUSG00000032085.5	Tagln	6.80444e+06	1.06508e+07	5.13131e+06	6.57586e+06	8.25903e+06	9.36829e+06	5.97144e+06	1.03243e+07	2.1954e+06	4.0206e+06	4.46652e+06	6.6069e+06	1
High	Master Protein	P38060	Hydroxymethylglutaryl-CoA lyase, mitochondrial [OS=Mus musculus]	0	51.83	18	5	73	5	325	34.2	8.41	887	71.89	5	5	Pf00682	15356	ENSMUSG00000028672.13	Hmgcl	5.59054e+06	5.47028e+06	4.95189e+06	5.93424e+06	6.45937e+06	5.33672e+06	4.90614e+06	5.30262e+06	2.11864e+06	3.6283e+06	3.49326e+06	3.76368e+06	1
High	Master Protein	P38575	Uroplakin-2 [OS=Mus musculus]	0	15.2	8	1	4	1	184	19.6	9.6	121	6.4	1	1	Pf07353	22269		Upk2	372543	322323	517662	494100	637527	742437	326936	312444	221479	302102	344778	523597	1
High	Master Protein	P38647	Stress-70 protein, mitochondrial [OS=Mus musculus]	0	717.756	58	36	1597	35	679	73.4	6.07	29339	2529.45	36	36	Pf00012, Pf06723	15526	ENSMUSG00000024359.8	Hspa9	2.76538e+08	2.84412e+08	2.51217e+08	2.86645e+08	2.97907e+08	2.79071e+08	2.42684e+08	2.75695e+08	1.07482e+08	1.7526e+08	1.6111e+08	1.96813e+08	1	Oxidation [K377; K555]
High	Master Protein	P39054-2	Isoform 2 of Dynamin-2 [OS=Mus musculus]	0	174.73	26	19	181	1	866	97.7	7.62		383.83		19	Pf00169, Pf00350, Pf01031, Pf02212	13430	ENSMUSG00000033335.17	Dnm2	532993	611576	543598	609264	654480	416473	467743	592832	232575	372515	353946	293714	1
High	Master Protein	P39876	Metalloproteinase inhibitor 3 [OS=Mus musculus]	0.005	2.43	4	1	4	1	211	24.2	8.76	16	2.1	1	1	Pf00965	21859	ENSMUSG00000020044.13	Timp3	519204	524791	458290	356853	402240	552633	455642	508706	196077	218186	217533	389740	1
High	Master Protein	P40142	Transketolase [OS=Mus musculus]	0	549.561	57	31	1500	31	623	67.6	7.5	23821	2497.52	31	31	Pf00456, Pf00676, Pf02779, Pf02780	21881	ENSMUSG00000021957.6	Tkt	4.31648e+08	3.975e+08	3.22397e+08	3.29376e+08	3.92987e+08	3.38102e+08	3.78806e+08	3.85317e+08	1.37936e+08	2.01386e+08	2.12529e+08	2.38443e+08	1	Oxidation [P288; P441]
High	Master Protein	P40201	Chromodomain-helicase-DNA-binding protein 1 [OS=Mus musculus]	0	23.147	3	3	19	2	1711	196.3	7.37	75	15.12	3	3	Pf00176, Pf00271, Pf00385, Pf11496, Pf13907	12648	ENSMUSG00000023852.13	Chd1	275798	310861	327682	318393	360364	412662	242034	301333	140197	194671	194887	291026	1
High	Master Protein	P40237	CD82 antigen [OS=Mus musculus]	0	9.763	5	1	4	1	266	29.6	5.02	47	4.2	1	1	Pf00335	12521	ENSMUSG00000027215.13	Cd82	250539	342142	269719	310614	287973	346573	219868	331656	115398	189915	155737	244418	1
High	Master Protein	P40240	CD9 antigen [OS=Mus musculus]	0	12.154	5	1	4	1	226	25.2	7.23	52	5.69	1	1	Pf00335	12527	ENSMUSG00000030342.8	Cd9	350829	423069	283602	615864	739493	659208	307881	410102	121338	376550	399921	464900	1
High	Master Protein	P40336	Vacuolar protein sorting-associated protein 26A [OS=Mus musculus]	0	88.831	34	8	169	7	327	38.1	6.57	1627	201.6	8	8	Pf03643	30930	ENSMUSG00000020078.16	Vps26a	8.2551e+06	1.07788e+07	1.17058e+07	1.13796e+07	1.21617e+07	1.24806e+07	7.2445e+06	1.04484e+07	5.00827e+06	6.95769e+06	6.57708e+06	8.80183e+06	1	Oxidation [P257; P259]
High	Master Protein	P40936	Indolethylamine N-methyltransferase [OS=Mus musculus]	0	4.004	4	1	4	1	264	29.4	6.39	16	1.86	1	1	Pf01234	21743	ENSMUSG00000003477.5	Inmt	175251	237622	92224.9	122765	217278	211950	153796	230339	39457.9	75061	117505	149476	1
High	Master Protein	P41241	tyrosine-protein kinase CSK [OS=Mus musculus]	0	36.914	14	5	39	5	450	50.7	7.06	190	38.26	5	5	Pf00017, Pf00018, Pf00069, Pf07653, Pf07714, Pf14604	12988	ENSMUSG00000032312.7	Csk	3.03216e+06	2.09185e+06	3.19324e+06	2.23332e+06	3.68527e+06	1.97455e+06	2.66096e+06	2.02774e+06	1.36621e+06	1.36549e+06	1.99301e+06	1.39253e+06	1
High	Master Protein	P41778-1	pre-B-cell leukemia transcription factor 1 [OS=Mus musculus]	0	103.431	22	6	138	6	430	46.6	7.03	2001	246.03	6	6	Pf00046, Pf03792, Pf04091, Pf05920	18514	ENSMUSG00000052534.15	Pbx1	5.64077e+06	5.87566e+06	6.1013e+06	6.2451e+06	5.80117e+06	5.63755e+06	4.95022e+06	5.69557e+06	2.61041e+06	3.81836e+06	3.1373e+06	3.97583e+06	1	Oxidation [P103]
High	Master Protein	P42128	Forkhead box protein K1 [OS=Mus musculus]	0	17.194	5	3	31	3	719	74.9	9.17	52	14.42	3	3	Pf00250, Pf00498	17425	ENSMUSG00000056493.9	Foxk1	606203	557288	498045	748283	518495	552558	531991	540208	213085	457514	280404	389687	1
High	Master Protein	P42208	septin-2 [OS=Mus musculus]	0	155.611	54	13	314	13	361	41.5	6.55	5230	463.16	13	12	Pf00071, Pf00735, Pf01926	18000	ENSMUSG00000026276.18; ENSMUSG00000112508.1	Sept2	8.85047e+07	8.57501e+07	9.56916e+07	8.9031e+07	8.16022e+07	9.15427e+07	7.76699e+07	83121910	4.09411e+07	5.44352e+07	4.41308e+07	6.45597e+07	1
High	Master Protein	P42227	Signal transducer and activator of transcription 3 [OS=Mus musculus]	0	40.269	11	5	30	5	770	88	6.3	159	22.41	5	5	Pf00017, Pf01017, Pf02864, Pf02865	20848	ENSMUSG00000004040.16	Stat3	1.29376e+06	1.07357e+06	1.06675e+06	1.41489e+06	1.40712e+06	1.62681e+06	1.13538e+06	1.04066e+06	456405	865092	760977	1147295	1
High	Master Protein	P42232	Signal transducer and activator of transcription 5B [OS=Mus musculus]	0.001	3.277	2	1	6	1	786	89.9	6.05	15	0	1	1	Pf00017, Pf01017, Pf02864, Pf02865	20851	ENSMUSG00000020919.11	Stat5b	140344	206356	181622	174014	201467	147857	123163	200031	77706.1	106395	108954	104275	1
High	Master Protein	P42669	Transcriptional activator protein Pur-alpha [OS=Mus musculus]	0	25.592	13	3	78	3	321	34.9	6.44	976	104.95	3	3	Pf04845	19290	ENSMUSG00000043991.4	Pura	2.77915e+06	3.46601e+06	3.01385e+06	3.29576e+06	3.31725e+06	3.97585e+06	2.43893e+06	3.35978e+06	1.28946e+06	2.01509e+06	1.79398e+06	2.80393e+06	1
High	Master Protein	P42867	UDP-N-acetylglucosamine--dolichyl-phosphate N-acetylglucosaminephosphotransferase [OS=Mus musculus]	0	7.23	2	1	2	1	410	46.4	7.87	20	2.31	1	1	Pf00953	13478	ENSMUSG00000032123.5	Dpagt1	171384	215963		196524	101260	132392	150403	209344		120159	54761.8	93368.3	1
High	Master Protein	P43135	COUP transcription factor 2 [OS=Mus musculus]	0	45.477	15	5	83	5	414	45.5	8.28	853	110.42	5	5	Pf00104, Pf00105	11819	ENSMUSG00000030551.14	Nr2f2	1.48722e+07	1.39004e+07	1.85712e+07	1.79231e+07	1.70894e+07	1.55552e+07	1.30515e+07	1.34743e+07	7.9456e+06	1.09585e+07	9.24201e+06	1.09702e+07	1
High	Master Protein	P43247	DNA mismatch repair protein MSH2 [OS=Mus musculus]	0	109.434	18	14	161	14	935	104.1	5.96	1222	143.91	14	14	Pf00488, Pf01624, Pf05188, Pf05190, Pf05192	17685	ENSMUSG00000024151.13	Msh2	1.18574e+07	1.27598e+07	1.70418e+07	1.57557e+07	1.58555e+07	1.15344e+07	1.04058e+07	1.23688e+07	7291221	9.63333e+06	8.57472e+06	8.13453e+06	1
High	Master Protein	P43274	Histone H1.4 [OS=Mus musculus]	0	161.525	33	11	1269	3	219	22	11.11	10956	1025.41	11	10	Pf00538	50709	ENSMUSG00000051627.2	Hist1h1e	5.90678e+07	3.00212e+07	4.8877e+07	4.57293e+07	4.13702e+07	2.69045e+07	5.18367e+07	2.91011e+07	2.09117e+07	2.79597e+07	2.23732e+07	1.89742e+07	1
High	Master Protein	P43275	Histone H1.1 [OS=Mus musculus]	0	137.013	28	9	791	5	213	21.8	10.93	6438	787.84	9	9	Pf00538	80838	ENSMUSG00000049539.2	Hist1h1a	4.21183e+07	2.51006e+07	4.42436e+07	4.34665e+07	4.07996e+07	2.75858e+07	3.69622e+07	2.43313e+07	1.89294e+07	2.65762e+07	2.20646e+07	1.94547e+07	1
High	Master Protein	P45377	Aldose reductase-related protein 2 [OS=Mus musculus]	0	45.464	31	7	41	2	316	36.1	6.37	288	33.82	6	7	Pf00248	14187	ENSMUSG00000029762.6	Akr1b8	621623	1.50817e+06	375379	391042	903570	718699	545523	1.46195e+06	160604	239090	488655	506856	1
High	Master Protein	P45591	Cofilin-2 [OS=Mus musculus]	0	63.59	44	7	271	5	166	18.7	7.88	2629	333.34	7	7	Pf00241	12632	ENSMUSG00000062929.7	Cfl2	9.44222e+06	9.52518e+06	7.70702e+06	8.08115e+06	8.52078e+06	9.87767e+06	8.28629e+06	9.23324e+06	3.2974e+06	4.94096e+06	4.60808e+06	6.96614e+06	1
High	Master Protein	P45952	medium-chain specific acyl-CoA dehydrogenase, mitochondrial [OS=Mus musculus]	0	267.578	50	19	595	19	421	46.5	8.37	7263	890.81	19	19	Pf00441, Pf02770, Pf02771, Pf08028	11364	ENSMUSG00000062908.12	Acadm	1.21226e+08	1.6836e+08	1.06558e+08	1.20127e+08	1.65159e+08	1.63687e+08	1.06386e+08	1.632e+08	4.55904e+07	7.34478e+07	8.93187e+07	1.15438e+08	1
High	Master Protein	P46412	Glutathione peroxidase 3 [OS=Mus musculus]	0	85.981	32	6	224	6	226	25.4	8.22	2649	243.08	6	6	Pf00255	14778	ENSMUSG00000018339.11	Gpx3	2.29925e+07	3.33173e+07	1.65583e+07	2.46774e+07	2.757e+07	4.11083e+07	2.01778e+07	3.22961e+07	7.08436e+06	1.50882e+07	1.491e+07	2.89913e+07	1	Oxidation [P194]
High	Master Protein	P46460	Vesicle-fusing ATPase [OS=Mus musculus]	0	153.928	28	16	252	16	744	82.6	6.95	2181	282.34	16	16	Pf00004, Pf00910, Pf01078, Pf02359, Pf02933, Pf05272, Pf05496, Pf06068, Pf07724, Pf07728, Pf13173, Pf13191, Pf13207, Pf13401	18195	ENSMUSG00000034187.18	Nsf	1.34873e+07	1.68942e+07	1.38066e+07	1.61725e+07	1.60372e+07	1.48542e+07	1.18362e+07	1.63764e+07	5.90706e+06	9.88818e+06	8.67299e+06	1.04758e+07	1
High	Master Protein	P46467	Vacuolar protein sorting-associated protein 4B [OS=Mus musculus]	0	95.411	29	10	183	1	444	49.4	7.11	1283	205.68	10	9	Pf00004, Pf00910, Pf01078, Pf01695, Pf04212, Pf06068, Pf07724, Pf07728, Pf09336, Pf13173, Pf13207, Pf13401	20479	ENSMUSG00000009907.17	Vps4b	1.26913e+07	1.21633e+07	1.38189e+07	1.26864e+07	1.24216e+07	1.2067e+07	1.11376e+07	1.17905e+07	5.91234e+06	7.75671e+06	6.71764e+06	8.51016e+06	1
High	Master Protein	P46638	Ras-related protein Rab-11B [OS=Mus musculus]	0	140.521	52	12	412	12	218	24.5	5.94	3649	543.26	12	12	Pf00025, Pf00071, Pf01926, Pf08477, Pf13401	19326	ENSMUSG00000077450.12	Rab11b	1.23274e+08	1.45508e+08	1.26601e+08	1.32318e+08	1.55428e+08	1.65053e+08	1.08183e+08	1.41049e+08	5.41655e+07	8.09018e+07	8.4056e+07	1.16402e+08	1
High	Master Protein	P46664	adenylosuccinate synthetase isozyme 2 [OS=Mus musculus]	0	99.621	23	8	146	8	456	50	6.38	1449	182.51	8	8	Pf00709	11566	ENSMUSG00000015961.8	Adss	9.03256e+06	1.29673e+07	8.07358e+06	9.67834e+06	1.14373e+07	1.08047e+07	7.92679e+06	1.25698e+07	3.45423e+06	5.91751e+06	6.18535e+06	7.6199e+06	1
High	Master Protein	P46735-1	Unconventional myosin-Ib [OS=Mus musculus]	0	305.825	28	25	445	24	1107	128.5	9.26	5955	599.25	25	25	Pf00063, Pf06017	17912	ENSMUSG00000018417.14	Myo1b	3.01088e+07	3.09979e+07	3.61117e+07	3.57543e+07	3.34769e+07	4.21292e+07	2.64229e+07	3.00478e+07	1.54502e+07	2.18608e+07	1.81044e+07	2.97112e+07	1
High	Master Protein	P46737	Lys-63-specific deubiquitinase BRCC36 [OS=Mus musculus]	0	45.383	19	4	24	4	291	33.3	5.83	386	25.99	4	4	Pf01398	210766	ENSMUSG00000031201.17	Brcc3	1.49271e+06	1.96319e+06	1.12068e+06	1.565e+06	1.63046e+06	2.01473e+06	1.30997e+06	1.90302e+06	479476	956867	881762	1.42087e+06	1
High	Master Protein	P46935	E3 ubiquitin-protein ligase NEDD4 [OS=Mus musculus]	0	339.575	35	27	752	23	887	102.6	5.26	9810	1067.87	26	27	Pf00168, Pf00397, Pf00632	17999	ENSMUSG00000032216.14	Nedd4	1.04898e+08	1.02296e+08	1.03652e+08	1.06392e+08	9.90281e+07	1.06725e+08	9.20559e+07	9.91611e+07	4.43471e+07	6.50501e+07	5.35549e+07	7.52667e+07	1	Oxidation [P110; P436]
High	Master Protein	P47199	Quinone oxidoreductase [OS=Mus musculus]	0	223.009	54	13	292	13	331	35.2	8.07	3524	498.99	13	13	Pf00107, Pf08240, Pf13602	12972	ENSMUSG00000028199.18	Cryz	4.43183e+07	5.81107e+07	3.93997e+07	3.87998e+07	4.48016e+07	6.27269e+07	3.88928e+07	5.63296e+07	1.68569e+07	2.37229e+07	2.42289e+07	4.42376e+07	1
High	Master Protein	P47738	Aldehyde dehydrogenase, mitochondrial [OS=Mus musculus]	0	242.912	48	21	711	19	519	56.5	7.62	11119	1014.5	21	21	Pf00171	11669	ENSMUSG00000029455.14	Aldh2	1.45865e+08	1.8578e+08	1.5855e+08	1.73732e+08	1.8598e+08	1.79939e+08	1.28008e+08	1.80086e+08	6.78349e+07	1.06223e+08	1.00579e+08	1.269e+08	1
High	Master Protein	P47753	F-actin-capping protein subunit alpha-1 [OS=Mus musculus]	0	170.247	70	14	378	1	286	32.9	5.55	4337	596.14	14	14	Pf01267	12340		Capza1	4.88184e+07	5.08312e+07	5.01862e+07	5.49803e+07	5.46722e+07	5.93729e+07	4.2842e+07	4.92732e+07	2.14719e+07	3.3616e+07	2.9567e+07	4.18722e+07	1
High	Master Protein	P47754	F-actin-capping protein subunit alpha-2 [OS=Mus musculus]	0	201.395	72	13	417	10	286	32.9	5.85	6138	751.52	13	13	Pf01267	12343	ENSMUSG00000015733.13	Capza2	3.28343e+07	3.76673e+07	3.53157e+07	4.05963e+07	3.53501e+07	4.18083e+07	2.88147e+07	3.65128e+07	1.51096e+07	2.48213e+07	1.91175e+07	2.94849e+07	1
High	Master Protein	P47809	Dual specificity mitogen-activated protein kinase kinase 4 [OS=Mus musculus]	0	18.673	7	2	32	2	397	44.1	8.07	96	30.92	2	2	Pf00069, Pf07714, Pf14531	26398	ENSMUSG00000033352.11	Map2k4	1.26337e+06	1.7486e+06	1.235e+06	1.28655e+06	1.22352e+06	1.47179e+06	1.10871e+06	1.695e+06	528387	786620	661687	1.03797e+06	1
High	Master Protein	P47811	Mitogen-activated protein kinase 14 [OS=Mus musculus]	0	44.913	25	6	55	5	360	41.3	5.88	124	46.15	5	6	Pf00069, Pf01636, Pf07714	26416	ENSMUSG00000053436.14	Mapk14	2.9799e+06	2.85172e+06	3.10313e+06	3.61599e+06	4.09528e+06	3.35706e+06	2.6151e+06	2.76431e+06	1.32766e+06	2.21088e+06	2.21474e+06	2.36753e+06	1	Oxidation [P266]
High	Master Protein	P47856	glutamine--fructose-6-phosphate aminotransferase [isomerizing] 1 [OS=Mus musculus]	0	168.21	31	15	226	15	697	78.5	6.84	3038	306.2	15	15	Pf00310, Pf01380, Pf13230, Pf13522, Pf13537, Pf13580	14583	ENSMUSG00000029992.14	Gfpt1	1.24815e+07	1.70913e+07	1.16879e+07	1.34098e+07	1.48178e+07	1.5396e+07	1.09535e+07	1.65674e+07	5.00061e+06	8.19899e+06	8.01351e+06	1.08579e+07	1
High	Master Protein	P47857	ATP-dependent 6-phosphofructokinase, muscle type [OS=Mus musculus]	0	154.207	24	14	251	10	780	85.2	8	2941	316.22	14	14	Pf00365	18642	ENSMUSG00000033065.13	Pfkm	6.72765e+06	8.78188e+06	6.58327e+06	7.28195e+06	8.22066e+06	8.91172e+06	5.90404e+06	8.51272e+06	2.81662e+06	4.45231e+06	4.44577e+06	6.28491e+06	1
High	Master Protein	P47911	60S ribosomal protein L6 [OS=Mus musculus]	0	184.992	44	17	593	17	296	33.5	10.7	6339	640.71	17	17	Pf01159, Pf03868	19988	ENSMUSG00000029614.13	Rpl6	1.76619e+08	1.34426e+08	1.57056e+08	1.40627e+08	1.34592e+08	1.21494e+08	154997475	1.30306e+08	6.71953e+07	8.59817e+07	7.27879e+07	8.56828e+07	1
High	Master Protein	P47941	Crk-like protein [OS=Mus musculus]	0	37.569	18	4	46	4	303	33.8	6.74	466	38.88	4	4	Pf00017, Pf00018, Pf07653, Pf14604	12929	ENSMUSG00000006134.3	Crkl	1.56551e+06	1.77436e+06	1.60753e+06	2.20031e+06	2.23897e+06	2.1058e+06	1.37386e+06	1.71998e+06	687774	1.34531e+06	1.21085e+06	1.4851e+06	1
High	Master Protein	P47955	60S acidic ribosomal protein P1 [OS=Mus musculus]	0	53.538	52	2	24	2	114	11.5	4.32	505	65.26	2	2	Pf00428	56040	ENSMUSG00000007892.8	Rplp1	1.89712e+07	4.99133e+06	1.41356e+07	3.9752e+06	2.20867e+06	3.07746e+06	16648721	4.83835e+06	6.04785e+06	2.43051e+06	1.19446e+06	2.17035e+06	1	Oxidation [P41; P44; K49]
High	Master Protein	P47962	60S ribosomal protein L5 [OS=Mus musculus]	0	443.439	45	20	1527	2	297	34.4	9.77	17028	1982.06	20	20	Pf00861, Pf14204	100503670	ENSMUSG00000058558.12	Rpl5	3.46241e+08	3.22164e+08	3.66205e+08	3.63099e+08	3.62925e+08	3.4641e+08	3.03854e+08	3.1229e+08	1.56679e+08	2.22006e+08	1.96272e+08	2.44303e+08	1	Oxidation [P233; K241; K242]
High	Master Protein	P47963	60S ribosomal protein L13 [OS=Mus musculus]	0	98.438	34	9	528	9	211	24.3	11.55	5613	648.81	9	9	Pf01294	270106	ENSMUSG00000000740.12	Rpl13	1.7705e+08	1.80671e+08	1.96826e+08	1.99455e+08	2.08305e+08	2.05694e+08	155375141	1.75133e+08	8.4211e+07	1.2195e+08	1.12652e+08	1.45064e+08	1	Oxidation [P153]
High	Master Protein	P48024	eukaryotic translation initiation factor 1 [OS=Mus musculus]	0	21.709	34	2	24	2	113	12.7	7.44	228	34.1	2	2	Pf01253	20918	ENSMUSG00000035530.13	Eif1	604472	660573	602432	815005	773026	1.54826e+06	530472	640327	257747	498309	418056	1.09189e+06	1
High	Master Protein	P48036	annexin A5 [OS=Mus musculus]	0	222.094	60	19	592	19	319	35.7	4.96	7893	773.32	19	19	Pf00191	11747	ENSMUSG00000027712.13	Anxa5	1.82135e+08	1.85987e+08	1.80081e+08	1.79905e+08	1.77266e+08	1.82251e+08	1.59838e+08	1.80287e+08	7.70467e+07	1.09997e+08	9.58662e+07	1.28531e+08	1	Oxidation [K84]
High	Master Protein	P48678-1	Prelamin-A/C [OS=Mus musculus]	0	535.741	63	41	1066	39	665	74.2	6.98	15181	1450.06	41	40	Pf00038, Pf00932, Pf12128	16905	ENSMUSG00000028063.15	Lmna	1.27552e+08	1.15097e+08	1.09095e+08	1.19466e+08	1.25668e+08	1.21803e+08	1.11937e+08	1.1157e+08	4.66758e+07	7.30437e+07	6.79621e+07	8.59003e+07	1
High	Master Protein	P48758	Carbonyl reductase [NADPH] 1 [OS=Mus musculus]	0	255.929	68	17	726	17	277	30.6	8.31	8267	1008.3	17	17	Pf00106, Pf01370, Pf08659, Pf13561	12408	ENSMUSG00000051483.8	Cbr1	7.93326e+07	1.21287e+08	6.42935e+07	7.22915e+07	1.20805e+08	1.06929e+08	6.96207e+07	1.1757e+08	2.75076e+07	4.42003e+07	6.53317e+07	7.54108e+07	1	Oxidation [K174]
High	Master Protein	P48771	Cytochrome c oxidase subunit 7A2, mitochondrial [OS=Mus musculus]	0	45.657	28	2	72	2	83	9.3	10.27	937	86.51	2	2	Pf02238	12866	ENSMUSG00000032330.7	Cox7a2	8.66859e+06	9.59425e+06	5.07694e+06	6.36235e+06	1.08607e+07	1.46428e+07	7.60738e+06	9.3002e+06	2.17214e+06	3.89005e+06	5.87349e+06	1.03267e+07	1
High	Master Protein	P48774	Glutathione S-transferase Mu 5 [OS=Mus musculus]	0	136.868	54	10	278	9	224	26.6	7.21	2687	334.43	10	10	Pf00043, Pf02798, Pf14497	14866	ENSMUSG00000004032.10	Gstm5	1.8293e+07	2.17128e+07	1.50243e+07	1.78405e+07	2.03282e+07	2.72539e+07	1.60536e+07	2.10473e+07	6.42807e+06	1.0908e+07	1.09936e+07	1.92206e+07	1
High	Master Protein	P49070	calcium signal-modulating cyclophilin ligand [OS=Mus musculus]	0	5.384	12	2	4	2	294	32.5	7.74	0	0	2	2	Pf14963	12328	ENSMUSG00000021501.4	Caml	273251	453310	429043	353343	298191	428883	239799	439416	183563	216040	161263	302466	1
High	Master Protein	P49135	TFIIH basal transcription factor complex helicase XPB subunit [OS=Mus musculus]	0	4.341	1	1	18	1	783	89.1	7.18	60	7.52	1	1	Pf00271, Pf04851, Pf13625	13872	ENSMUSG00000024382.13	Ercc3	365049	337026	401617	417537		325911	320359	326696	171829	255289		229846	1
High	Master Protein	P49586	choline-phosphate cytidylyltransferase A [OS=Mus musculus]	0	17.652	10	2	16	2	367	41.6	7.03	90	23.05	2	2	Pf01467	13026	ENSMUSG00000005615.14	Pcyt1a	705730	1.02298e+06	776299	798945	945887	996807	619334	991624	332135	488489	511540	702989	1
High	Master Protein	P49615	Cyclin-dependent-like kinase 5 [OS=Mus musculus]	0	8.769	8	3	18	2	292	33.3	7.66	20	24.91	2	3	Pf00069, Pf07714	12568	ENSMUSG00000028969.10	Cdk5	1.22357e+06	1.41508e+06	1.67694e+06	1.69097e+06	1.09059e+06	1.2848e+06	1.07378e+06	1.37171e+06	717471	1033892	589793	906096	1
High	Master Protein	P49717	DNA replication licensing factor MCM4 [OS=Mus musculus]	0	341.822	38	23	414	23	862	96.7	7.2	4880	664.59	23	23	Pf00493, Pf07728, Pf14551	17217	ENSMUSG00000022673.4	Mcm4	4.02449e+07	4.00689e+07	4.5705e+07	4.45338e+07	4.46798e+07	3.72048e+07	3.53181e+07	3.88408e+07	1.95546e+07	2.72287e+07	2.41631e+07	2.62383e+07	1	Oxidation [P296; P357]
High	Master Protein	P49722	Proteasome subunit alpha type-2 [OS=Mus musculus]	0	113.807	32	7	186	7	234	25.9	7.43	2724	301.38	7	7	Pf00227, Pf10584	19166	ENSMUSG00000015671.10	Psma2	4.97667e+07	5.23554e+07	5.45091e+07	5.03126e+07	5.41144e+07	5.63278e+07	4.36742e+07	5.07507e+07	2.33214e+07	3.0762e+07	2.92653e+07	3.97247e+07	1	Oxidation [P81]
High	Master Protein	P49769	Presenilin-1 [OS=Mus musculus]	0	18.438	7	2	16	2	467	52.6	5.38	352	19.13	2	2	Pf01080	19164	ENSMUSG00000019969.13	Psen1	271910	133118	114393	342965	342838	345654	238623	129038	48942.3	209695	185408	243770	1
High	Master Protein	P49817	Caveolin-1 [OS=Mus musculus]	0	33.101	25	3	22	3	178	20.5	6.02	286	31.52	3	3	Pf01146	12389	ENSMUSG00000007655.16	Cav1	2.31158e+06	2.54378e+06	2.35362e+06	2.19938e+06	3.69288e+06	5.04099e+06	2.0286e+06	2.46582e+06	1.00698e+06	1.34474e+06	1.99713e+06	3.55511e+06	1
High	Master Protein	P50171	estradiol 17-beta-dehydrogenase 8 [OS=Mus musculus]	0	48.28	25	4	12	4	259	26.6	6.54	135	14.36	4	4	Pf00106, Pf08659, Pf13561	14979	ENSMUSG00000073422.10	H2-Ke6	1.92793e+06	2.45419e+06	1.66056e+06	2.10159e+06	2.43185e+06	2.61843e+06	1.69191e+06	2.37897e+06	710460	1.28495e+06	1.31515e+06	1.84663e+06	1
High	Master Protein	P50285	Dimethylaniline monooxygenase [N-oxide-forming] 1 [OS=Mus musculus]	0	101.294	21	10	83	10	532	59.9	8.47	956	109.32	10	10	Pf00743, Pf07992, Pf13434, Pf13450, Pf13454, Pf13738	14261	ENSMUSG00000040181.14	Fmo1	9.52658e+06	1.63329e+07	9.54711e+06	1.25913e+07	1.52664e+07	1.62404e+07	8.36033e+06	1.58323e+07	4.08467e+06	7.69854e+06	8.25616e+06	1.14534e+07	1
High	Master Protein	P50396	Rab GDP dissociation inhibitor alpha [OS=Mus musculus]	0	197.884	45	16	442	10	447	50.5	5.08	5572	571.09	16	16	Pf00996	14567	ENSMUSG00000015291.10	Gdi1	1.05962e+07	1.49223e+07	1.03581e+07	1.21822e+07	1.38277e+07	1.37576e+07	9.29902e+06	1.44649e+07	4.43163e+06	7.4484e+06	7.47807e+06	9.70239e+06	1
High	Master Protein	P50446	Keratin, type II cytoskeletal 6A [OS=Mus musculus]	0	170.257	25	19	243	2	553	59.3	7.94	1759	272.1	19	19	Pf00038, Pf01576, Pf04111, Pf05957, Pf12128, Pf13166	16687	ENSMUSG00000058354.6	Krt6a	4.68681e+07	3.87887e+07	3.33755e+08	3.0892e+07	2.24589e+07	1.11598e+07	4.11305e+07	3.75998e+07	1.42795e+08	1.88879e+07	1.21459e+07	7.87034e+06	1
High	Master Protein	P50516-1	V-type proton ATPase catalytic subunit A [OS=Mus musculus]	0	392.383	53	26	975	26	617	68.3	5.58	14240	1387.12	26	26	Pf00006, Pf00306, Pf02874	11964	ENSMUSG00000052459.13	Atp6v1a	1.25423e+08	1.47043e+08	1.14888e+08	1.19436e+08	1.35943e+08	1.55663e+08	1.10069e+08	1.42536e+08	4.9154e+07	7.3025e+07	7.35186e+07	1.0978e+08	1
High	Master Protein	P50518	V-type proton ATPase subunit E 1 [OS=Mus musculus]	0	98.936	32	7	111	7	226	26.1	8.43	1193	142.14	7	7	Pf01991	11973	ENSMUSG00000019210.10	Atp6v1e1	1.70657e+07	1.93955e+07	1.68927e+07	2.00231e+07	2.50755e+07	2.79727e+07	1.49765e+07	1.88011e+07	7.22744e+06	1.22425e+07	1.35609e+07	1.97275e+07	1	Oxidation [P209]
Medium	Master Protein	P50543	protein S100-A11 [OS=Mus musculus]	0.016	1.692	7	1	2	1	98	11.1	5.45	28	2.16	1	1	Pf00036, Pf01023, Pf13499, Pf13833	20195	ENSMUSG00000027907.4	S100a11	1.91399e+06	1.58491e+06	1.66948e+06	1.58396e+06	1.6232e+06	1.25061e+06	1.67968e+06	1.53633e+06	714276	968464	877833	881983	1
High	Master Protein	P50544	Very long-chain specific acyl-CoA dehydrogenase, mitochondrial [OS=Mus musculus]	0	199.018	33	19	454	19	656	70.8	8.75	5847	626.31	19	19	Pf00441, Pf02770, Pf02771, Pf08028	11370	ENSMUSG00000018574.14	Acadvl	2.63003e+07	3.58777e+07	2.4581e+07	2.66064e+07	2.91748e+07	3.12995e+07	2.30806e+07	3.4778e+07	1.05168e+07	1.62676e+07	1.57779e+07	2.20737e+07	1
High	Master Protein	P50580	proliferation-associated protein 2G4 [OS=Mus musculus]	0	393.313	59	23	1044	23	394	43.7	6.86	12247	1338.55	23	23	Pf00557	18813	ENSMUSG00000025364.13	Pa2g4	1.73425e+08	1.59197e+08	1.7855e+08	1.98088e+08	1.62962e+08	1.57279e+08	1.52194e+08	1.54317e+08	7.63917e+07	1.21115e+08	8.81306e+07	1.1092e+08	1	Oxidation [K172; P330]
Medium	Master Protein	P50586-1	tubby protein [OS=Mus musculus]	0.038	1.073	3	1	1	1	505	55.3	8.68	0		1		Pf01167	22141	ENSMUSG00000031028.14	Tub	142513	157802	281162	320824	289617	234996	125066	152965	120293	196158	156626	165729	1
High	Master Protein	P50637	translocator protein [OS=Mus musculus]	0	9.762	8	1	14	1	169	18.8	9.52	24	0	1	1	Pf03073	12257	ENSMUSG00000041736.7	Tspo	227753	530855	70516.9	215318	183562	473495	199872	514585	30170.3	131649	99271.3	333928	1
High	Master Protein	P51150	ras-related protein Rab-7a [OS=Mus musculus]	0	177.859	75	13	370	13	207	23.5	6.7	6083	589.03	13	13	Pf00025, Pf00071, Pf01926, Pf04670, Pf07728, Pf08477	19349	ENSMUSG00000079477.9	Rab7	5.47367e+07	7.35245e+07	6.82855e+07	7.32409e+07	8.08689e+07	8.83886e+07	4.80358e+07	7.1271e+07	2.92155e+07	4.47808e+07	4.37343e+07	6.23353e+07	1
High	Master Protein	P51174	Long-chain specific acyl-CoA dehydrogenase, mitochondrial [OS=Mus musculus]	0	221.647	42	16	430	1	430	47.9	8.31	3382	502.09	16	16	Pf00441, Pf02770, Pf02771, Pf08028	11363		Acadl	1.55519e+06	3.70374e+06	988338	1.73787e+06	4.73835e+06	3.93821e+06	1.3648e+06	3.59022e+06	422854	1.06257e+06	2.56252e+06	2777391	1	Oxidation [K240; K419]
High	Master Protein	P51410	60S ribosomal protein L9 [OS=Mus musculus]	0	242.937	55	11	639	11	192	21.9	9.95	6813	959.24	11	11	Pf00347	20005	ENSMUSG00000047215.14	Rpl9	1.7421e+08	2.02269e+08	2.54365e+08	2.36662e+08	2.34432e+08	2.42674e+08	1.52883e+08	1.96069e+08	1.08829e+08	1.44699e+08	1.26782e+08	1.71144e+08	1
High	Master Protein	P51655	Glypican-4 [OS=Mus musculus]	0	66.554	15	6	73	6	557	62.5	6.33	442	57.65	6	6	Pf01153	14735	ENSMUSG00000031119.4	Gpc4	4.21967e+06	5.35866e+06	4.12627e+06	4.70399e+06	4.74239e+06	6.22611e+06	3.70309e+06	5.19442e+06	1.7654e+06	2.87611e+06	2.56471e+06	4.39091e+06	1
High	Master Protein	P51660	peroxisomal multifunctional enzyme type 2 [OS=Mus musculus]	0	299.984	40	22	543	22	735	79.4	8.57	6833	761.01	22	22	Pf00106, Pf01575, Pf02036, Pf08659, Pf13452, Pf13561, Pf14864	15488	ENSMUSG00000024507.6	Hsd17b4	4.65142e+07	5.4256e+07	4.42975e+07	4.88975e+07	5.04821e+07	5.61162e+07	4.08199e+07	5.25931e+07	1.89524e+07	2.98968e+07	2.7301e+07	3.95755e+07	1
High	Master Protein	P51807	Dynein light chain Tctex-type 1 [OS=Mus musculus]	0	55.129	44	3	86	3	113	12.5	5.08	932	119.23	3	3	Pf03645	21648; 100040531; 100040563; 100310872	ENSMUSG00000092074.1; ENSMUSG00000095677.1; ENSMUSG00000096255.1; ENSMUSG00000000579.14	Dynlt1b; Dynlt1f; Dynlt1c; Dynlt1a	3.2136e+06	3.99777e+06	2.96209e+06	3.13267e+06	3.43276e+06	4.366e+06	2.82019e+06	3.87525e+06	1.26731e+06	1.91537e+06	1.85645e+06	3.07908e+06	1
High	Master Protein	P51855	glutathione synthetase [OS=Mus musculus]	0	72.039	27	11	118	11	474	52.2	5.8	1329	136.06	11	11	Pf03199, Pf03917	14854	ENSMUSG00000027610.17	Gss	2.08837e+07	2.84217e+07	1.72853e+07	1.83188e+07	2.45206e+07	2.22253e+07	1.83271e+07	2.75506e+07	7.3954e+06	1.12005e+07	1.32608e+07	1.56742e+07	1
High	Master Protein	P51859	hepatoma-derived growth factor [OS=Mus musculus]	0	77.873	57	9	109	7	237	26.3	4.83	597	113.87	9	9	Pf00855	15191	ENSMUSG00000004897.16	Hdgf	1.02885e+07	8.0733e+06	1.07424e+07	9.09828e+06	8.70575e+06	9.57716e+06	9.02897e+06	7.82586e+06	4.59608e+06	5.56285e+06	4.70811e+06	6.75421e+06	1	Oxidation [K21; P34]
High	Master Protein	P51881	ADP/ATP translocase 2 [OS=Mus musculus]	0	353.555	66	22	1238	10	298	32.9	9.73	14103	1566.48	22	22	Pf00153	11740	ENSMUSG00000016319.3	Slc25a5	3.58541e+08	4.71297e+08	4.04668e+08	4.56927e+08	4.98122e+08	5.08722e+08	3.14649e+08	4.56853e+08	1.73135e+08	2.79374e+08	2.69387e+08	3.58772e+08	1
High	Master Protein	P51885	Lumican [OS=Mus musculus]	0	25.971	12	4	67	4	338	38.2	6.43	398	69.14	4	3	Pf01462, Pf12799, Pf13855	17022	ENSMUSG00000036446.5	Lum	1.0203e+07	8.18808e+06	7.14759e+06	1.00157e+07	1.00373e+07	7.97191e+06	8.95391e+06	7.93713e+06	3.05806e+06	6.12378e+06	5.42821e+06	5.62212e+06	1
Medium	Master Protein	P52019	squalene monooxygenase [OS=Mus musculus]	0.02	1.582	2	1	2	1	572	63.7	8.47	0	0	1	1	Pf00070, Pf01266, Pf01494, Pf02254, Pf07992, Pf08491, Pf13450	20775	ENSMUSG00000022351.14	Sqle	183494			340886	377823	354306	161031			208424	204328	249871	1
High	Master Protein	P52196	thiosulfate sulfurtransferase [OS=Mus musculus]	0	92.309	33	9	198	9	297	33.4	7.85	2040	284.84	9	9	Pf00581	22117	ENSMUSG00000044986.8	Tst	1.72172e+07	2.93789e+07	1.42005e+07	1.82038e+07	2.64675e+07	2.58133e+07	1.51095e+07	2.84785e+07	6.07561e+06	1.11301e+07	1.43137e+07	1.82046e+07	1
[truncated: 2,974 more rows]

## Sheet: ECM fraction (all)
Protein FDR Confidence: Combined	Master	Accession	Description	Exp. q-value: Combined	Sum PEP Score	Coverage [%]	# Peptides	# PSMs	# Unique Peptides	# AAs	MW [kDa]	calc. pI	Score Mascot: Mascot	Score Sequest HT: Sequest HT	# Peptides (by Search Engine): Mascot	# Peptides (by Search Engine): Sequest HT	Pfam IDs	Entrez Gene ID	Ensembl Gene ID	Gene Symbol	Abundances (Normalized): F1: Control, Control	Abundances (Normalized): F2: Control, Control	Abundances (Normalized): F3: Control, Control	Abundances (Normalized): F4: Control, Control	Abundances (Normalized): F5: Control, Control	Abundances (Normalized): F6: Control, Control	Abundance: F1: Control, Control	Abundance: F2: Control, Control	Abundance: F3: Control, Control	Abundance: F4: Control, Control	Abundance: F5: Control, Control	Abundance: F6: Control, Control	# Protein Groups	Modifications
[truncated: 2,241 more rows]

[truncated: 2 more sheets: Cellular fraction (matrix), ECM fraction (matrix)]
