# Supplementary material for: Kidney organoids recapitulate human basement membrane assembly in health and disease
Source: eLife. 2022 Jan 25;11:e73486. doi: 10.7554/eLife.73486 (PMC8849328; doi:10.7554/eLife.73486)
Supplement: Supplementary file 6. [file elife-73486-supp6.xlsx]

## Sheet: Glom cellular fraction (all)
Accession	Protein FDR Confidence: Combined	Description	# Unique Peptides	Gene	Abundances (Normalized): F2: Sample, G_37, Young	Abundances (Normalized): F3: Sample, G_29, Young	Abundances (Normalized): F6: Sample, G_15, Young	Abundance: F2: Sample, G_37, Young	Abundance: F3: Sample, G_29, Young	Abundance: F6: Sample, G_15, Young
A0A023QT24	High	Cytochrome c oxidase subunit 1 OS=Homo sapiens GN=COX1 PE=3 SV=1	2	COX1	247463	48142.8	99330.3	105615	37082	32439.2
A0A023QZ36	High	NADH-ubiquinone oxidoreductase chain 1 OS=Homo sapiens GN=ND1 PE=3 SV=1	1	ND1	112061	151118	106298	47826.9	116399	34714.8
A0A024DAE5	Medium	Integrin beta (Fragment) OS=Homo sapiens GN=ITGB2 PE=3 SV=1	1	ITGB2	199775	298923	554418	85262.6	230245	181062
A0A024QYU1	High	membrane interacting protein of RGS16, isoform CRA_a [OS=Homo sapiens]	1	GDE1	38571	47798.2	-	16461.8	36816.5	-
A0A024QZT9	High	NAD(P)H dehydrogenase, quinone 2, isoform CRA_a [OS=Homo sapiens]	6	NQO2	1.12184e+06	168277	1.20486e+06	478793	129616	393483
A0A024QZW7	High	nucleoporin 153kDa, isoform CRA_a [OS=Homo sapiens]	1	NUP153	104531	57186.2	279398	44613.2	44047.7	91245.9
A0A024R035	High	Complement component 9, isoform CRA_a [OS=Homo sapiens]	13	C9	4.26432e+06	2.3496e+06	2.26254e+06	1.81998e+06	1.80978e+06	738898
A0A024R1F4	High	hCG2010666, isoform CRA_a [OS=Homo sapiens]	10	hCG_2010666	1.04348e+07	1.3671e+07	4.62548e+06	4.45351e+06	1.05301e+07	1.51059e+06
A0A024R1G6	Medium	Apolipoprotein L, 3, isoform CRA_a OS=Homo sapiens GN=APOL3 PE=4 SV=1	1	APOL3	18310.4	22259.1	25590.5	7814.74	17145	8357.34
A0A024R1M8	High	Apolipoprotein L, 2, isoform CRA_a [OS=Homo sapiens]	3	APOL2	72027.3	266524	126393	30740.7	205290	41277.3
A0A024R1U9	High	Glucose-6-phosphatase, catalytic (Glycogen storage disease type I, von Gierke disease), isoform CRA_a [OS=Homo sapiens]	2	G6PC	320921	291899	157459	136966	224835	51422.9
A0A024R210	High	Interferon induced transmembrane protein 1 (9-27), isoform CRA_a [OS=Homo sapiens]	1	IFITM1	3.66258e+06	3.13021e+06	3.98222e+06	1.56316e+06	2.41104e+06	1.30051e+06
A0A024R2G1	High	Cysteine-rich with EGF-like domains 1, isoform CRA_b [OS=Homo sapiens]	7	CRELD1	1.26699e+06	966880	626722	540744	744739	204675
A0A024R2N0	High	Transporter [OS=Homo sapiens]	1	SLC6A6	75281.5	102186	67217.1	32129.6	78708.4	21951.7
A0A024R2W4	High	dystroglycan 1 (dystrophin-associated glycoprotein 1), isoform CRA_a [OS=Homo sapiens]	5	DAG1	646570	1.76183e+06	1.08952e+06	275951	1.35705e+06	355814
A0A024R300	High	Hyaluronidase [OS=Homo sapiens]	1	HYAL2	48839.4	32701.3	59816.1	20844.3	25188.2	19534.7
A0A024R321	High	filamin B, beta (actin binding protein 278), isoform CRA_a [OS=Homo sapiens]	48	FLNB	5.10711e+06	4.6927e+06	5.31855e+06	2.17968e+06	3.61455e+06	1.73693e+06
A0A024R3R5	High	lamin B receptor, isoform CRA_a [OS=Homo sapiens]	3	LBR	756841	920163	697523	323014	708755	227797
A0A024R3S9	High	Kynurenine 3-monooxygenase [OS=Homo sapiens]	10	KMO	1.85605e+06	1.66049e+06	630274	792148	1.27899e+06	205835
A0A024R442	High	aspartyl aminopeptidase, isoform CRA_b [OS=Homo sapiens]	5	DNPEP	862848	211985	1.53995e+06	368257	163282	502915
A0A024R462	High	fibronectin 1, isoform CRA_n [OS=Homo sapiens]	49	FN1	3.37915e+06	1.21787e+07	4.64332e+06	1.4422e+06	9.38061e+06	1.51641e+06
A0A024R4V7	High	Uncharacterized protein [OS=Homo sapiens]	8	TTC38	948507	391877	1.6069e+06	404816	301843	524780
A0A024R4X0	High	NADH-cytochrome b5 reductase [OS=Homo sapiens]	16	CYB5R3	3.35285e+07	3.6761e+07	2.46028e+07	1.43097e+07	2.83152e+07	8.03476e+06
A0A024R4X1	High	Protein kinase C and casein kinase substrate in neurons 2, isoform CRA_a [OS=Homo sapiens]	3	PACSIN2	270366	101747	262107	115390	78370.7	85598.9
A0A024R509	High	Arylsulfatase A, isoform CRA_a [OS=Homo sapiens]	1	ARSA	-	53489.7	22812.8	-	41200.4	7450.19
A0A024R5G4	High	Nuclear mitotic apparatus protein 1, isoform CRA_c [OS=Homo sapiens]	13	NUMA1	112248	847825	181596	47906.6	653037	59305.4
A0A024R6X1	High	Carboxylic ester hydrolase [OS=Homo sapiens]	13	CES2	2.90196e+06	2.6108e+06	1.31442e+06	1.23854e+06	2.01097e+06	429262
A0A024R798	High	choline transporter-like protein 2 isoform 2 [OS=Homo sapiens]	2	SLC44A2	2.11224e+07	3.03723e+07	2.63e+07	9.01488e+06	2.33942e+07	8.58905e+06
A0A024R7A5	High	Maltase-glucoamylase (Alpha-glucosidase), isoform CRA_a [OS=Homo sapiens]	2	MGAM	182155	342051	113464	77742.3	263465	37055
A0A024R7X1	Medium	Telomeric repeat binding factor (NIMA-interacting) 1, isoform CRA_a [OS=Homo sapiens]	1	TERF1	678074	870522	374434	289397	670519	122282
A0A024R837	High	haloacid dehalogenase-like hydrolase domain containing 3, isoform CRA_a [OS=Homo sapiens]	2	HDHD3	681217	440409	583969	290738	339224	190713
A0A024R850	High	Mitochondrial ribosome recycling factor, isoform CRA_a [OS=Homo sapiens]	2	MRRF	35302.1	49666.2	-	15066.7	38255.3	-
A0A024R884	High	tenascin C (hexabrachion), isoform CRA_a [OS=Homo sapiens]	13	TNC	173044	1.11103e+06	614049	73853.9	855771	200536
A0A024R8D4	High	mitochondrial ribosomal protein S2, isoform CRA_a [OS=Homo sapiens]	2	MRPS2	150910	96408.6	22301.8	64407.3	74258.7	7283.31
A0A024R8V0	High	septin 9, isoform CRA_a [OS=Homo sapiens]	5	SEPT9	306373	276650	748854	130758	213089	244561
A0A024R8X4	High	Uncharacterized protein [OS=Homo sapiens]	1	OGFOD3	34950.4	62863.7	57722.4	14916.6	48420.7	18850.9
A0A024R962	High	hCG40889, isoform CRA_b [OS=Homo sapiens]	3	CFH	147798	96828.3	135130	63079.2	74581.9	44130.7
A0A024R9E2	High	poly(A) binding protein, cytoplasmic 1, isoform CRA_c [OS=Homo sapiens]	6	PABPC1	336454	128068	550330	143596	98644.4	179726
A0A024R9H1	High	matrilin 2, isoform CRA_a [OS=Homo sapiens]	3	MATN2	150652	88361.6	94953.3	64297.1	68060.4	31009.8
A0A024R9K7	High	Chromosome 15 open reading frame 24, isoform CRA_b [OS=Homo sapiens]	4	EMC7	614374	451777	411770	262210	347981	134476
A0A024RAB6	High	Heparan sulfate proteoglycan 2 (Perlecan), isoform CRA_b [OS=Homo sapiens]	45	HSPG2	1.55542e+07	1.08432e+07	3.15925e+07	6.63844e+06	8.35196e+06	1.03175e+07
A0A024RAC9	High	Zinc finger, UBR1 type 1, isoform CRA_c [OS=Homo sapiens]	4	UBR4	54142.8	22561	78791.6	23107.8	17377.6	25731.7
A0A024RAY9	High	Lymphoid-restricted membrane protein, isoform CRA_a [OS=Homo sapiens]	2	LRMP	274650	-	767986	117218	-	250809
A0A024RCA6	High	Solute carrier family 25 (Mitochondrial carrier: glutamate), member 22, isoform CRA_a [OS=Homo sapiens]	5	SLC25A22	808114	973925	608895	344897	750165	198853
A0A024RD07	High	Trinucleotide repeat containing 5, isoform CRA_c [OS=Homo sapiens]	1	CNPY3	-	61130.5	42083.3	-	47085.7	13743.6
A0A059QFD5	High	Cytochrome c oxidase subunit 2 [OS=Homo sapiens]	1	COX2	7.58962e+06	3.26664e+06	2.44407e+06	3.2392e+06	2.51612e+06	798184
A0A059QM41	High	NADH dehydrogenase subunit 3 [OS=Homo sapiens]	1	ND3	1.22971e+06	675206	309390	524832	520077	101040
A0A059QXN6	High	Cytochrome c oxidase subunit 1 [OS=Homo sapiens]	1	COX1	585814	342534	228900	250021	263837	74754.2
A0A059RM34	High	Cytochrome c oxidase subunit 1 [OS=Homo sapiens]	2	COX1	233781	54002	45951	99775.9	41595	15006.7
A0A059RWU6	High	Cytochrome c oxidase subunit 1 OS=Homo sapiens GN=COX1 PE=3 SV=1	2	COX1	-	108118	74567.9	-	83278.1	24352.3
A0A067XG54	High	Phospholipid-transporting ATPase [OS=Homo sapiens]	13	ATP11C	1.30359e+06	1.82842e+06	2.15887e+06	556360	1.40834e+06	705044
A0A087WTA8	High	Collagen alpha-2(I) chain [OS=Homo sapiens]	2	COL1A2	142910	207693	252954	60993.1	159975	82609.6
A0A087WTJ2	High	GIMAP1-GIMAP5 readthrough [OS=Homo sapiens]	4	GIMAP1-GIMAP5	309971	208619	400628	132293	160689	130837
A0A087WU07	High	MICOS complex subunit Mic10 [OS=Homo sapiens]	1	MINOS1	2.61959e+06	1.29493e+06	1.35232e+06	1.11802e+06	997415	441639
A0A087WUC6	High	Signal peptidase complex subunit 2 [OS=Homo sapiens]	9	SPCS2	4.58397e+06	4.47218e+06	3.64132e+06	1.9564e+06	3.44469e+06	1.18918e+06
A0A087WUD3	High	oligosaccharyltransferase complex subunit OSTC [OS=Homo sapiens]	1	OSTC	1.68523e+06	1.6897e+06	1.14092e+06	719242	1.30149e+06	372601
A0A087WUL9	High	26S proteasome non-ATPase regulatory subunit 13 [OS=Homo sapiens]	6	PSMD13	665051	183304	782186	283839	141190	255446
A0A087WUQ6	High	Glutathione peroxidase [OS=Homo sapiens]	6	GPX1	718580	621640	1.00583e+06	306685	478818	328485
A0A087WUX8	High	MICOS complex subunit [OS=Homo sapiens]	10	APOOL	3.45838e+06	2.79296e+06	1.77471e+06	1.47601e+06	2.15127e+06	579583
A0A087WVC6	High	Receptor-type tyrosine-protein phosphatase eta [OS=Homo sapiens]	1	PTPRJ	35660.4	41470.2	83157.9	15219.6	31942.4	27157.7
A0A087WVQ6	High	Clathrin heavy chain [OS=Homo sapiens]	74	CLTC	6.38022e+07	7.25648e+07	5.87317e+07	2.72303e+07	5.5893e+07	1.91806e+07
A0A087WW23	High	Arachidonate 5-lipoxygenase-activating protein [OS=Homo sapiens]	2	ALOX5AP	151701	108286	86808.3	64745	83407.5	28349.8
A0A087WX43	High	Putative bifunctional UDP-N-acetylglucosamine transferase and deubiquitinase ALG13 [OS=Homo sapiens]	1	ALG13	53920.3	62031.3	49262.9	23012.8	47779.6	16088.3
A0A087WX80	High	Laminin subunit alpha-2 [OS=Homo sapiens]	6	LAMA2	60831.8	474082	274225	25962.5	365161	89556.4
A0A087WXB0	High	secretory carrier-associated membrane protein [OS=Homo sapiens]	5	SCAMP1	221753	1.49446e+06	434132	94642.5	1.15111e+06	141779
A0A087WXM3	Medium	NACHT, LRR and PYD domains-containing protein 5 [OS=Homo sapiens]	1	NLRP5	941085	918371	848173	401648	707374	276996
A0A087WXS7	High	ATPase ASNA1 [OS=Homo sapiens]	4	-	308947	336298	393809	131856	259034	128610
A0A087WY55	High	chromosome 6 open reading frame 55, isoform CRA_b [OS=Homo sapiens]	1	VTA1	51877.2	-	47740.6	22140.8	-	15591.1
A0A087WYL5	High	Seizure 6-like protein 2 [OS=Homo sapiens]	1	SEZ6L2	778958	712675	1.20625e+06	332453	548937	393938
A0A087WYT3	High	Prostaglandin E synthase 3 [OS=Homo sapiens]	2	PTGES3	122205	14866.4	197658	52156.2	11450.8	64551
A0A087X0K0	High	Collagen alpha-1(XV) chain [OS=Homo sapiens]	2	COL15A1	-	34547.3	50675.7	-	26610.1	16549.7
A0A087X0K9	High	Tight junction protein ZO-1 [OS=Homo sapiens]	17	TJP1	251746	2.10734e+06	513942	107444	1.62318e+06	167843
A0A087X0N2	High	Leptin receptor gene-related protein [OS=Homo sapiens]	2	LEPROT	263696	239815	188570	112544	184718	61583
A0A087X0R6	Medium	Sorting nexin-12 [OS=Homo sapiens]	1	SNX12	29260.6	29070.7	67054.8	12488.2	22391.7	21898.7
A0A087X0S5	High	Collagen alpha-1(VI) chain [OS=Homo sapiens]	13	COL6A1	2.15342e+06	1.35977e+06	4.37816e+06	919064	1.04736e+06	1.42982e+06
A0A087X0X3	High	Heterogeneous nuclear ribonucleoprotein M [OS=Homo sapiens]	15	HNRNPM	329133	2.50459e+06	470567	140472	1.92916e+06	153678
A0A087X2D0	High	Serine/arginine-rich-splicing factor 3 [OS=Homo sapiens]	2	SRSF3	84470.1	428735	75019.9	36051.2	330233	24500
A0A087X2I1	High	26S proteasome regulatory subunit 10B [OS=Homo sapiens]	5	PSMC6	395388	171036	288968	168749	131741	94371.1
A0A090N8G0	High	glycyl-tRNA synthetase [OS=Homo sapiens]	4	GARS	236891	139624	203727	101103	107545	66533
A0A096LPE2	High	SAA2-SAA4 readthrough [OS=Homo sapiens]	1	SAA2-SAA4	87295.7	84675.5	30834	37257.1	65221.3	10069.8
A0A096WXL7	High	ATP synthase protein 8 [OS=Homo sapiens]	3	ATP8	1.39662e+06	929443	826427	596066	715903	269894
A0A097PWY7	High	Cytochrome c oxidase subunit 2 [OS=Homo sapiens]	1	COX2	2.08501e+07	1.15913e+07	7.07123e+06	8.89867e+06	8.92821e+06	2.30932e+06
A0A097Q0T5	High	Cytochrome c oxidase subunit 2 [OS=Homo sapiens]	1	COX2	100025	55127.7	35717.2	42689.8	42462.1	11664.5
A0A097ZMP6	High	CUX1-RET fusion protein variant a [OS=Homo sapiens]	1	CUX1-RETa	53427.9	38328.6	68582	22802.6	29522.6	22397.5
A0A0A0MR02	High	Voltage-dependent anion-selective channel protein 2 [OS=Homo sapiens]	13	VDAC2	7.25641e+07	4.55944e+07	2.815e+07	3.09698e+07	3.5119e+07	9.1932e+06
A0A0A0MR04	High	Signal peptidase complex catalytic subunit SEC11C [OS=Homo sapiens]	1	SEC11C	261141	146002	182473	111453	112458	59591.9
A0A0A0MR09	High	Tyrosine-protein phosphatase non-receptor type 9 [OS=Homo sapiens]	3	PTPN9	188094	21437.1	163120	80277.3	16511.9	53271.8
A0A0A0MR74	High	Diacylglycerol O-acyltransferase 1 [OS=Homo sapiens]	2	LOC642255	50256.4	141042	99604.8	21449	108637	32528.9
A0A0A0MRG8	High	bcl-2 homologous antagonist/killer [OS=Homo sapiens]	2	BAK1	288848	154668	135534	123278	119133	44262.7
A0A0A0MRK6	High	metaxin 1, isoform CRA_b [OS=Homo sapiens]	10	MTX1	2.53822e+06	1.61098e+06	1.36197e+06	1.08329e+06	1.24085e+06	444793
A0A0A0MRV4	High	Prostamide/prostaglandin F synthase [OS=Homo sapiens]	1	FAM213B	24004.8	24768.6	36471.9	10245.1	19078	11911
A0A0A0MS54	High	cAMP-dependent protein kinase catalytic subunit beta [OS=Homo sapiens]	3	PRKACB	50291.2	82463.6	184267	21463.9	63517.5	60177.8
A0A0A0MSK5	High	Torsin-1A-interacting protein 1 [OS=Homo sapiens]	17	TOR1AIP1	2.51808e+06	7.33959e+06	3.51132e+06	1.0747e+06	5.65331e+06	1.14672e+06
A0A0A0MSS8	High	Aldo-keto reductase family 1 member C3 [OS=Homo sapiens]	6	AKR1C3	745614	428492	1.99922e+06	318223	330046	652904
A0A0A0MSX9	High	isoleucine--tRNA ligase, cytoplasmic [OS=Homo sapiens]	9	IARS1	279582	245555	337809	119324	189139	110322
A0A0A0MT64	High	NADPH:adrenodoxin oxidoreductase, mitochondrial [OS=Homo sapiens]	6	FDXR	147954	350238	244018	63145.5	269771	79691.2
A0A0A0MTH3	High	Integrin-linked protein kinase [OS=Homo sapiens]	13	ILK	1.03397e+06	2.18634e+06	2.88898e+06	441292	1.68403e+06	943483
A0A0A0MTQ5	High	Chromosome 14 open reading frame 2 [OS=Homo sapiens]	2	C14orf2	2.55762e+06	1.89659e+06	1.22735e+06	1.09157e+06	1.46084e+06	400828
A0A0A0MTS2	High	glucose-6-phosphate isomerase [OS=Homo sapiens]	16	-	8.28039e+06	2.68544e+06	1.09817e+07	3.53401e+06	2.06846e+06	3.58639e+06
A0A0A0MTS7	High	Titin [OS=Homo sapiens]	2	TTN	383764	153204	598487	163788	118005	195454
A0A0A1HAV9	High	H.sapiens ras-related Hrab4 protein [OS=Homo sapiens]	2	RAB4A	46403.7	119365	43223.4	19804.8	91940.6	14115.9
A0A0A1TTQ0	High	Lutheran blood group glycoprotein [OS=Homo sapiens]	22	BCAM	2.12346e+07	2.04843e+07	2.55725e+07	9.06276e+06	1.5778e+07	8.35146e+06
A0A0A6YY92	High	adenylosuccinate lyase [OS=Homo sapiens]	1	ADSL	58841.3	23184	101667	25113	17857.5	33202.5
A0A0A7CAQ4	High	MHC class II antigen [OS=Homo sapiens]	1	HLA-DQB1	147541	-	326332	62969.4	-	106573
A0A0A8LE04	High	MHC class II antigen [OS=Homo sapiens]	1	HLA-DRB1	39766.9	42907.4	-	16972.2	33049.4	-
A0A0B4J1R2	High	Acyl-CoA synthetase short-chain family member 3, mitochondrial [OS=Homo sapiens]	8	ACSS3	992936	771080	774972	423778	593924	253090
A0A0B4J1R4	High	4-hydroxyphenylpyruvate dioxygenase [OS=Homo sapiens]	8	HPD	1.44351e+06	762381	1.36381e+06	616080	587223	445394
A0A0B4J2D5	High	Uncharacterized protein [OS=Homo sapiens]	8	C21orf33; LOC102724023	2.92119e+06	3.7597e+06	3.98236e+06	1.24674e+06	2.89591e+06	1.30056e+06
A0A0B4J2F0	High	Protein PIGBOS1 [OS=Homo sapiens]	1	LOC101928527; PIGBOS1	45953.4	116763	76777.5	19612.6	89936.4	25074
A0A0C4DFL7	High	lanosterol 14-alpha demethylase [OS=Homo sapiens]	10	CYP51A1	1.0892e+06	73072.7	531474	464863	56284.2	173569
A0A0C4DFM1	High	Transmembrane 9 superfamily member [OS=Homo sapiens]	12	TM9SF4	1.85858e+06	1.43061e+06	1.17602e+06	793230	1.10192e+06	384064
A0A0C4DG51	High	Calcium-independent phospholipase A2-gamma [OS=Homo sapiens]	5	PNPLA8	315425	346289	333803	134621	266729	109013
A0A0C4DGA2	High	Enoyl-CoA delta isomerase 2, mitochondrial [OS=Homo sapiens]	13	ECI2	3.07761e+06	3.89796e+06	2.72779e+06	1.3135e+06	3.0024e+06	890840
A0A0C4DGN4	High	Zymogen granule protein 16 homolog B [OS=Homo sapiens]	4	ZG16B	232786	179517	326154	99351.3	138273	106515
A0A0C4DGQ8	High	Dehydrogenase/reductase SDR family member 7B [OS=Homo sapiens]	8	DHRS7B	969428	1.05625e+06	738990	413745	813577	241339
A0A0C4DGS9	High	Choline/ethanolaminephosphotransferase 1 [OS=Homo sapiens]	1	CEPT1	125020	184551	137737	53357.7	142150	44982.1
A0A0D3MLN1	High	Cytochrome c oxidase subunit 2 [OS=Homo sapiens]	1	COX2	37396.9	26537.1	-	15960.7	20440.2	-
A0A0D9SEX5	High	Palmitoyltransferase [OS=Homo sapiens]	1	ZDHHC6	33484.9	39211.5	-	14291.1	30202.7	-
A0A0D9SF54	High	Spectrin alpha chain, non-erythrocytic 1 [OS=Homo sapiens]	1	SPTAN1	59517.7	335054	153559	25401.7	258075	50149.2
A0A0D9SFB1	High	Dynamin-1 [OS=Homo sapiens]	1	DNM1	83013.6	56313	148839	35429.6	43375.1	48607.9
A0A0E3DD93	High	MHC class II antigen [OS=Homo sapiens]	1	HLA-DRB1	4.93964e+06	-	6.03227e+06	2.1082e+06	-	1.97002e+06
A0A0G2JH37	High	Tapasin [OS=Homo sapiens]	4	TAPBP	1.07248e+06	1.26893e+06	1.84198e+06	457726	977393	601555
A0A0G2JIN1	High	choline transporter-like protein 4 [OS=Homo sapiens]	1	SLC44A4	68853.3	35535.4	26446.9	29386.1	27371.1	8637.02
A0A0G2JIW1	High	Heat shock 70 kDa protein 1B [OS=Homo sapiens]	19	HSPA1B	1.27348e+07	5.47566e+07	2.54949e+07	5.43513e+06	4.21763e+07	8.32612e+06
A0A0G2JJD3	High	HLA-B associated transcript 5, isoform CRA_b [OS=Homo sapiens]	13	ABHD16A	1.6676e+06	1.55913e+06	1.25666e+06	711721	1.20092e+06	410399
A0A0G2JPP5	High	protein scribble homolog [OS=Homo sapiens]	4	SCRIB	82466.3	394996	268335	35196	304245	87632.7
A0A0G2JR96	High	cytoplasmic FMR1-interacting protein 1 [OS=Homo sapiens]	1	CYFIP1	59884.5	-	59122.4	25558.3	-	19308.2
A0A0G2JS82	High	AP-2 complex subunit alpha-2 [OS=Homo sapiens]	17	AP2A2	1.62749e+06	3.43701e+06	2.08569e+06	694601	2.64736e+06	681143
A0A0G2R1R3	High	MHC class I antigen [OS=Homo sapiens]	1	HLA-C	58206.9	-	35280.9	24842.3	-	11522
A0A0J9YW33	High	Syntaxin-3 [OS=Homo sapiens]	5	STX3	123359	323624	14221.1	52648.6	249271	4644.33
A0A0J9YWM3	High	Solute carrier family 22 member 18 [OS=Homo sapiens]	2	SLC22A18	284139	394782	124812	121269	304081	40761
A0A0J9YX89	High	selenoprotein F [OS=Homo sapiens]	2	SELENOF	194814	245173	231447	83145.3	188844	75585.8
A0A0J9YYF7	High	Disheveled-associated activator of morphogenesis 2 [OS=Homo sapiens]	6	DAAM2	58383.8	380203	226707	24917.8	292851	74037.9
A0A0J9YYI4	High	Serine incorporator 5 [OS=Homo sapiens]	1	SERINC5	249827	179894	-	106624	138563	-
A0A0J9YYJ0	High	Protein canopy homolog 4 [OS=Homo sapiens]	1	CNPY4	-	59166.3	95461.3	-	45572.8	31175.7
A0A0K2BMD8	High	Mutant hemoglobin alpha 2 globin chain [OS=Homo sapiens]	5	HBA2	4.02537e+06	2.80059e+07	5.17509e+06	1.718e+06	2.15715e+07	1.69008e+06
A0A0R4J2G3	High	Arylacetamide deacetylase-like 1 [OS=Homo sapiens]	8	NCEH1	1.18061e+06	1.02557e+06	851269	503874	789947	278007
A0A0S2C385	High	MHC class II antigen [OS=Homo sapiens]	1	HLA-DPB1	201429	198486	88369.2	85968.5	152884	28859.6
A0A0S2Z377	High	Annexin [OS=Homo sapiens]	1	ANXA6	123495	66601	108026	52706.8	51299.3	35279.1
A0A0S2Z3B0	High	argininosuccinate lyase isoform 3 [OS=Homo sapiens]	6	ASL	469620	254679	984742	200430	196166	321597
A0A0S2Z3C0	High	Actinin alpha 4 isoform 3 [OS=Homo sapiens]	1	ACTN4	182571	224822	138629	77920.1	173169	45273.5
A0A0S2Z3J4	High	D-amino-acid oxidase isoform 2 [OS=Homo sapiens]	6	DAO	877405	844470	615414	374470	650452	200982
A0A0S2Z471	High	Creatine kinase brain isoform 2 [OS=Homo sapiens]	6	CKB	1.66735e+06	594635	1.9221e+06	711613	458017	627719
A0A0S2Z580	High	Ethylmalonic encephalopathy 1 isoform 2 [OS=Homo sapiens]	5	ETHE1	604787	914964	861836	258119	704751	281458
A0A0S2Z5H0	High	Mitochondrial ribosomal protein S28 isoform 2 [OS=Homo sapiens]	2	MRPS28	120913	55266.8	34389.7	51604.7	42569.2	11231
A0A0S2Z5H5	High	Vacuolar protein sorting 28-like protein isoform 2 [OS=Homo sapiens]	1	VPS28	348530	367336	771431	148750	282940	251934
A0A0S2Z5P4	Medium	Jumonji domain containing 5 isoform 3 [OS=Homo sapiens]	1	KDM8	1.8693e+06	2.3373e+06	1.32799e+06	797803	1.80031e+06	433693
A0A0S2Z5Q3	High	sulfatase modifying factor 2 isoform 2 [OS=Homo sapiens]	5	SUMF2	878567	792126	944221	374966	610134	308363
A0A0S2Z5U2	High	NADH dehydrogenase 1 alpha subcomplex assembly factor 2 isoform 4 [OS=Homo sapiens]	3	NDUFAF2	90822	200662	90065.1	38762.2	154560	29413.4
A0A0S4XRL3	High	MHC class I antigen [OS=Homo sapiens]	3	HLA-A	629410	1.43977e+06	127758	268628	1.10898e+06	41723.1
A0A0U1RRL8	High	Spermatogenesis-associated protein 20 [OS=Homo sapiens]	1	SPATA20	82336.5	74569.6	76503.2	35140.6	57437.2	24984.4
A0A0X9T7V9	High	GCT-A4 light chain variable region [OS=Homo sapiens]	1	-	87802.6	51989.9	56065.7	37473.5	40045.2	18309.9
A0A0Y0LWT9	High	Cytochrome c oxidase subunit 3 [OS=Homo sapiens]	3	COX3	3.70916e+06	2.58966e+06	1.16414e+06	1.58304e+06	1.99469e+06	380184
A0A128DYX4	High	MHC class I antigen (Fragment) OS=Homo sapiens GN=HLA-C PE=3 SV=1	1	HLA-C	81942.3	-	40090.3	34972.4	-	13092.7
A0A140EDI1	High	MHC class II antigen [OS=Homo sapiens]	4	HLA-DPA1	3.78925e+06	3.02993e+06	1.71433e+07	1.61722e+06	2.3338e+06	5.59864e+06
A0A140T902	High	tenascin-X [OS=Homo sapiens]	3	TNXB	75394	44467.5	42737.5	32177.6	34251	13957.2
A0A140T9B7	High	HLA class I histocompatibility antigen, alpha chain F [OS=Homo sapiens]	2	HLA-F	230745	120575	216031	98480.1	92872.6	70551.3
A0A140TA32	High	Complement C4-A [OS=Homo sapiens]	2	C4A	711805	1.26998e+06	1.32272e+06	303793	978202	431974
A0A140TA69	High	keratin, type I cuticular Ha4 [OS=Homo sapiens]	3	KRT34	-	47917.5	81857.6	-	36908.4	26733
A0A140TA86	High	MICOS complex subunit MIC13 [OS=Homo sapiens]	4	C19orf70	3.20394e+06	1.86504e+06	1.45716e+06	1.36742e+06	1.43655e+06	475880
A0A140VKF9	High	testis tissue sperm-binding protein Li 76m [OS=Homo sapiens]	10	ECHDC3	2.66841e+06	2.51668e+06	2.66285e+06	1.13886e+06	1.93847e+06	869631
A0A142CHG9	High	GO2-q chimeric G-protein [OS=Homo sapiens]	3	GNAO1	241755	194659	195418	103179	149936	63819.5
A0A158T700	High	differentiation-associated catenin regulator [OS=Homo sapiens]	3	CDHR5	94185.8	155132	-	40197.8	119491	-
A0A161I202	High	lactoferrin [OS=Homo sapiens]	1	LTF	1.32565e+06	1.06335e+06	1.53138e+06	565779	819041	500118
A0A182DWF2	High	thioredoxin reductase 2, mitochondrial [OS=Homo sapiens]	5	TXNRD2	620237	580383	621266	264712	447040	202893
A0A186VN08	High	MHC class I antigen [OS=Homo sapiens]	1	HLA-A	3.48323e+06	-	4.43619e+06	1.48661e+06	-	1.44877e+06
A0A186VN52	High	MHC class I antigen [OS=Homo sapiens]	1	HLA-B	101823	118740	80858.6	43457.5	91459.5	26406.8
A0A1B0GTB0	High	Renin receptor [OS=Homo sapiens]	2	ATP6AP2	360684	269265	138019	153937	207402	45074.3
A0A1B0GU83	High	Very-long-chain 3-oxoacyl-CoA reductase [OS=Homo sapiens]	1	HSD17B12	422840	343018	332642	180465	264209	108634
A0A1B0GVD5	High	Cathepsin D [OS=Homo sapiens]	14	CTSD	1.43621e+07	1.3866e+07	1.62199e+07	6.12966e+06	1.06803e+07	5.29709e+06
A0A1B0GW05	High	Probable C-mannosyltransferase DPY19L1 [OS=Homo sapiens]	2	DPY19L1	72924.4	105549	66870.6	31123.6	81298.9	21838.6
A0A1B0GW68	High	Acid ceramidase [OS=Homo sapiens]	3	ASAH1	490347	250970	749176	209277	193310	244666
A0A1B0WUR8	High	Cytochrome c oxidase subunit 2 [OS=Homo sapiens neanderthalensis]	1	COX2	128912	107601	45707.6	55018.8	82879.4	14927.2
A0A1C3PHH2	High	MHC class I antigen [OS=Homo sapiens]	1	HLA-A	3.83176e+07	3.14692e+07	5.50183e+07	1.63537e+07	2.42391e+07	1.79679e+07
A0A1C3PI30	High	MHC class II antigen [OS=Homo sapiens]	1	HLA-DPB1	3.86336e+06	3.34558e+06	600851	1.64885e+06	2.57693e+06	196226
A0A1C7CYX0	High	Exocyst complex component 3-like protein 2 [OS=Homo sapiens]	13	EXOC3L2	291859	1.4413e+06	637089	124563	1.11016e+06	208060
A0A1L4AQQ4	High	Bcl2 [OS=Homo sapiens]	1	BCL2	196996	96455.3	101046	84076.4	74294.6	32999.7
A0A1L5LC20	High	MHC class II antigen [OS=Homo sapiens]	2	HLA-DPA1	5.53311e+06	4.70457e+06	22576.6	2.36149e+06	3.62369e+06	7373.05
A0A1P0AYU5	High	Sideroflexin [OS=Homo sapiens]	12	SFXN3	8.34454e+06	7.85653e+06	9.30923e+06	3.56139e+06	6.05149e+06	3.0402e+06
A0A1S5UZ21	High	Butyrophilin-like protein 9 [OS=Homo sapiens]	3	BTNL9	520971	1.49728e+06	328778	222346	1.15328e+06	107372
A0A1S5UZ22	High	Receptor-type tyrosine-protein phosphatase [OS=Homo sapiens]	2	PTPRA	50363.3	222310	49251.4	21494.7	171234	16084.5
A0A1S5UZI1	High	Monocarboxylate transporter 5 [OS=Homo sapiens]	3	SLC16A4	113088	296642	120771	48265.2	228489	39441.3
A0A1U9X819	High	mRpS18B [OS=Homo sapiens]	2	MRPS18B	104959	61848.9	55378.8	44795.6	47639.1	18085.6
A0A1U9X8X5	High	CDSN [OS=Homo sapiens]	1	CDSN	82332.7	103520	141508	35139	79736.2	46213.7
A0A1U9X8Y4	High	chloride intracellular channel protein [OS=Homo sapiens]	8	CLIC1	2.15697e+06	868140	3.6018e+06	920579	668684	1.17628e+06
A0A1U9X9D5	High	VarS [OS=Homo sapiens]	3	VARS	220759	51383.5	265120	94218.1	39578.1	86582.8
A0A1V0E3V4	High	HLA-DRA [OS=Homo sapiens]	8	HLA-DRA	2.80662e+07	4.49663e+07	4.46968e+07	1.19785e+07	3.46353e+07	1.45971e+07
A0A1V0E3X6	High	tap2 [OS=Homo sapiens]	9	TAP2	1.12823e+06	1.11061e+06	1.24498e+06	481520	855446	406584
A0A1V0E3X9	High	TAP1 [OS=Homo sapiens]	1	TAP1	1.80422e+06	2.54088e+06	2.83104e+06	770026	1.95711e+06	924559
A0A1W2PNP0	High	GPI transamidase component PIG-T [OS=Homo sapiens]	3	PIGT	342517	342662	329778	146184	263935	107699
A0A1W2PNR9	High	immediate early response 3-interacting protein 1 [OS=Homo sapiens]	2	IER3IP1	773295	854678	535806	330036	658316	174983
A0A1W2PPE6	High	Uncharacterized protein [OS=Homo sapiens]	1	-	187836	96614.2	54020.5	80166.9	74417	17642
A0A1W2PPI5	Medium	DEAD/H (Asp-Glu-Ala-Asp/His) box polypeptide 26B, isoform CRA_b [OS=Homo sapiens]	1	DDX26B; INTS6L	-	18142.7	79538.8	-	13974.4	25975.8
A0A1W2PQ51	High	Probable ATP-dependent RNA helicase DDX17 [OS=Homo sapiens]	5	DDX17	327924	989475	670060	139955	762143	218828
A0A1W2PQT5	High	Steroid 17-alpha-hydroxylase/17,20 lyase [OS=Homo sapiens]	5	CYP17A1	60918.8	8662.93	40860.3	25999.7	6672.62	13344.2
A0A1W2PQV2	High	Glycine cleavage system H protein, mitochondrial [OS=Homo sapiens]	2	GCSH	346566	364455	336409	147912	280721	109864
A0A1W2PR36	High	guanidinoacetate N-methyltransferase [OS=Homo sapiens]	1	GAMT	135042	77566.3	208468	57635.1	59745.4	68081.4
A0A1W2PS43	High	Lysosome membrane protein 2 [OS=Homo sapiens]	9	SCARB2	1.13695e+07	8.55838e+06	7.96436e+06	4.85241e+06	6.59209e+06	2.601e+06
A0A1W6IYJ3	High	N90-VRC38.14 heavy chain variable region [OS=Homo sapiens]	1	-	29530.7	19913.3	38572.7	12603.5	15338.2	12597.1
A0A1X7SBS1	High	Heterogeneous nuclear ribonucleoprotein U [OS=Homo sapiens]	6	HNRNPU	408419	878619	564375	174310	676756	184313
A0A1Y0BRN0	High	myosin VI transcript variant 008 [OS=Homo sapiens]	24	MYO6	2.27831e+06	1.85925e+06	1.67838e+06	972364	1.43209e+06	548123
A0A218MK64	High	MHC class I antigen [OS=Homo sapiens]	1	HLA-B	77766.2	2.51437e+06	254900	33190	1.93669e+06	83245.2
A0A223FL01	High	MHC class I antigen [OS=Homo sapiens]	1	HLA-A	1.90162e+06	2.98996e+06	6.51287e+06	811597	2.30301e+06	2.12697e+06
A0A286SD53	High	Catechol-O-methyltransferase (Fragment) OS=Homo sapiens GN=COMT PE=4 SV=1	1	COMT	55385.7	46143.2	-	23638.2	35541.8	-
A0N4V7	Medium	HCG2039797 [OS=Homo sapiens]	1	Tcr-alpha	1.30107e+08	8.66736e+07	2.11254e+08	5.55287e+07	6.67603e+07	6.89912e+07
A0PJK1-1	High	Sodium/glucose cotransporter 5 [OS=Homo sapiens]	5	SLC5A10	1.00107e+06	1.33512e+06	200767	427249	1.02837e+06	65566.5
A0PK02	High	PLXNB2 protein [OS=Homo sapiens]	1	PLXNB2	15794.4	16163.5	72295.5	6740.95	12449.9	23610.2
A0S8J7	High	NADH-ubiquinone oxidoreductase chain 1 [OS=Homo sapiens]	2	ND1	3.30606e+06	2.22161e+06	1.00862e+06	1.411e+06	1.71119e+06	329393
A1A4E9	High	Keratin 13 [OS=Homo sapiens]	14	KRT13	1.50842e+06	4.62364e+06	3.46702e+06	643784	3.56135e+06	1.13226e+06
A1A4F3	High	O-phosphoseryl-tRNA(Sec) selenium transferase [OS=Homo sapiens]	2	SEPSECS	172266	41638.3	160497	73521.7	32071.9	52414.9
A1L0T0	High	Acetolactate synthase-like protein [OS=Homo sapiens]	16	ILVBL	3.8951e+06	4.08742e+06	2.32643e+06	1.6624e+06	3.14833e+06	759765
A1L172	High	acyl-CoA thioesterase 1 [OS=Homo sapiens]	15	ACOT1	1.87268e+06	1.28451e+06	4.69951e+06	799247	989395	1.53477e+06
A1L471	High	ATP-binding cassette, sub-family B (MDR/TAP), member 1 [OS=Homo sapiens]	13	ABCB1	1.53157e+06	1.22138e+06	606968	653665	940766	198223
A2A274	High	Aconitate hydratase, mitochondrial [OS=Homo sapiens]	36	ACO2	4.74864e+07	3.14968e+07	3.93916e+07	2.02668e+07	2.42604e+07	1.28645e+07
A2A2Y4-1	High	FERM domain-containing protein 3 [OS=Homo sapiens]	2	FRMD3	95633.9	262704	131821	40815.8	202347	43050
A2ACR1	High	Proteasome subunit beta type [OS=Homo sapiens]	2	PSMB9	103834	50592.4	248950	44315.7	38968.8	81302
A2IDC7	High	39S ribosomal protein L28, mitochondrial [OS=Homo sapiens]	1	MRPL28	52226.1	30980.9	-	22289.7	23863	-
A2RU51	High	PRR5-ARHGAP8 fusion [OS=Homo sapiens]	1	PRR5-ARHGAP8	227394	78032.4	354940	97050	60104.4	115916
A2RUF3	High	SLIT-ROBO Rho GTPase-activating protein 2 [OS=Homo sapiens]	1	SRGAP2	-	41447.6	42251.9	-	31925	13798.6
A3KMH1	High	von Willebrand factor A domain-containing protein 8 [OS=Homo sapiens]	4	VWA8	232834	75572.3	148372	99371.6	58209.5	48455.2
A4FU77	High	SNRNP200 protein [OS=Homo sapiens]	13	SNRNP200	181084	1.0017e+06	306263	77285.2	771558	100019
A4FUA5	High	ANTXR2 protein [OS=Homo sapiens]	3	ANTXR2	45389.3	152002	109388	19371.8	117079	35723.8
A4FVA6	High	MTCH1 protein [OS=Homo sapiens]	5	MTCH1	4.14593e+06	1.96304e+06	1.27881e+06	1.76945e+06	1.51203e+06	417633
A4IF54	High	TK2 protein [OS=Homo sapiens]	1	TK2	114875	141167	121923	49027.9	108734	39817.4
A4QPB0	High	IQ motif containing GTPase activating protein 1 [OS=Homo sapiens]	22	IQGAP1	2.04201e+06	1.30047e+06	2.95348e+06	871517	1.00169e+06	964545
A4QPH0	High	SLC5A1 protein [OS=Homo sapiens]	2	SLC5A1	243946	235329	-	104114	181262	-
A4UCR9	High	Mitochondrial 28S ribosomal protein S34 [OS=Homo sapiens]	3	MRPS34	190323	143478	82624.9	81228.6	110514	26983.6
A5D904	High	Rps9 protein [OS=Homo sapiens]	2	RPS9	268553	151117	326724	114616	116398	106701
A5PKX9	High	INADL protein [OS=Homo sapiens]	2	INADL; PATJ	-	86423	32842.6	-	66567.3	10725.7
A5PLL0	High	Cpt1B protein [OS=Homo sapiens]	2	CPT1B	185024	58966.7	50503.5	78967.1	45419	16493.4
A5PLM9	High	Cathepsin L1 [OS=Homo sapiens]	2	CTSL; CTSL1	115448	45026.4	117711	49272.5	34681.5	38441.9
A5YRU5	High	MUC1 isoform Z-LSP [OS=Homo sapiens]	5	MUC1	969986	316581	159567	413983	243847	52111.5
A6H8V1	High	Slit homolog 1 (Drosophila) [OS=Homo sapiens]	1	SLIT1	211683	178207	376330	90344.6	137264	122902
A6ND22	High	28S ribosomal protein S16, mitochondrial [OS=Homo sapiens]	1	MRPS16	151146	48212.8	33832.8	64508.2	37135.8	11049.1
A6ND91-1	High	putative L-aspartate dehydrogenase [OS=Homo sapiens]	2	ASPDH	45199.7	35331	83481.5	19290.9	27213.7	27263.4
A6NDI8	High	histone deacetylase 6 [OS=Homo sapiens]	1	HDAC6	47808.7	-	28604	20404.4	-	9341.47
A6NGJ0	High	Dynein light chain Tctex-type 3 [OS=Homo sapiens]	1	DYNLT3	-	60379.8	75824.7	-	46507.5	24762.8
A6NGR9	Medium	Maestro heat-like repeat-containing protein family member 6 [OS=Homo sapiens]	1	C8orf73; MROH6	82361.9	55241.9	39259.8	35151.5	42550	12821.4
A6NHL2-1	High	Tubulin alpha chain-like 3 [OS=Homo sapiens]	1	TUBAL3	104485	168664	207602	44593.2	129913	67798.7
A6NKZ2	High	N-acylglucosamine 2-epimerase [OS=Homo sapiens]	3	RENBP	503898	154447	340642	215060	118963	111247
A6NLN1	High	polypyrimidine tract binding protein 1, isoform CRA_b [OS=Homo sapiens]	4	PTBP1	234848	255999	349416	100231	197183	114112
A6PVS0	High	Chloride intracellular channel 2 [OS=Homo sapiens]	1	CLIC2	42363.3	28138	69844.4	18080.3	21673.3	22809.8
A6PVX3	Medium	26S proteasome non-ATPase regulatory subunit 4 [OS=Homo sapiens]	1	PSMD4	42143.1	16453.9	70857.1	17986.3	12673.6	23140.5
A6QKW0	High	SHINC3 [OS=Homo sapiens]	3	TMEM33	1.52377e+06	2.18095e+06	1.21612e+06	650332	1.67988e+06	397160
A7E2E4	High	Dipeptidyl-peptidase 6 [OS=Homo sapiens]	14	DPP6	1.75952e+06	2.53256e+06	2.53491e+06	750951	1.9507e+06	827851
A7YA96	High	gamma-glutamyl carboxylase [OS=Homo sapiens]	4	GGCX	365950	255661	159607	156185	196923	52124.3
A8JLH9	High	ATP synthase subunit A [OS=Homo sapiens]	2	ATP6	6.69023e+06	7.34957e+06	3.31637e+06	2.85534e+06	5.661e+06	1.08306e+06
A8JZZ8	High	cDNA FLJ77826, highly similar to Homo sapiens BCS1-like (yeast), mRNA [OS=Homo sapiens]	7	BCS1L	1.9784e+06	1.07503e+06	909830	844367	828040	297132
A8K051	High	cDNA FLJ76695, highly similar to Homo sapiens acyl-CoA synthetase medium-chain family member 2 (ACSM2), nuclear gene encoding mitochondrial protein, mRNA [OS=Homo sapiens]	7	ACSM2B	2.17519e+07	1.62392e+07	2.33291e+07	9.28356e+06	1.25082e+07	7.61881e+06
A8K0D2	High	cDNA FLJ77740, highly similar to Homo sapiens 7-dehydrocholesterol reductase, mRNA [OS=Homo sapiens]	3	DHCR7	439777	182937	206996	187694	140907	67600.6
A8K0D8	High	cDNA FLJ75412, highly similar to Homo sapiens G protein-coupled receptor 116 (GPR116), mRNA [OS=Homo sapiens]	14	GPR116; ADGRF5	2.12629e+06	2.29644e+06	3.13693e+06	907485	1.76883e+06	1.02446e+06
A8K0T9	High	cDNA FLJ75422, highly similar to Homo sapiens capping protein (actin filament) muscle Z-line, alpha 1, mRNA [OS=Homo sapiens]	6	CAPZA1	1.11467e+06	1.5315e+06	2.22852e+06	475732	1.17963e+06	727790
A8K169	High	cDNA FLJ77252, highly similar to Homo sapiens protein tyrosine phosphatase, receptor type, O (PTPRO), transcript variant 1, mRNA [OS=Homo sapiens]	14	PTPRO	2.17724e+06	7.68998e+06	3.32023e+06	929229	5.9232e+06	1.08432e+06
A8K1E9	High	cDNA FLJ78497 [OS=Homo sapiens]	5	PMPCB	221462	174183	174023	94518.1	134164	56832.5
A8K1T7	Medium	cDNA FLJ75600, highly similar to Homo sapiens cytochrome P450, family 2, subfamily U, polypeptide 1(CYP2U1), mRNA [OS=Homo sapiens]	1	CYP2U1	47745.6	62658.2	74314.9	20377.5	48262.4	24269.8
A8K285	High	cDNA FLJ78239 [OS=Homo sapiens]	2	TMEM87A	205043	229302	178330	87510.7	176620	58238.8
A8K2Q6	High	peptidyl-prolyl cis-trans isomerase [OS=Homo sapiens]	2	PPIC	41640.2	65276.6	58573.3	17771.7	50279.2	19128.8
A8K2X6	High	cDNA FLJ77840, highly similar to Homo sapiens solute carrier family 43, member 3 (SLC43A3), mRNA [OS=Homo sapiens]	1	SLC43A3	42611.3	49844.7	-	18186.2	38392.8	-
A8K3C5	High	cDNA FLJ77715, highly similar to Homo sapiens cisplatin resistance-associated overexpressed protein(LUC7A), mRNA [OS=Homo sapiens]	3	LUC7L3	40239.1	117576	56885.4	17173.8	90562.9	18577.6
A8K3W7	High	cDNA FLJ76271, highly similar to Homo sapiens protein O-fucosyltransferase 2 (POFUT2), transcript variant 3, mRNA [OS=Homo sapiens]	1	POFUT2	30809	42792.8	37953.4	13149.1	32961.2	12394.8
A8K424	High	cDNA FLJ76272, highly similar to Homo sapiens solute carrier family 23 (nucleobase transporters), member 1 (SLC23A1), transcript variant 2, mRNA [OS=Homo sapiens]	7	SLC23A1	1.31697e+06	1.74799e+06	373463	562074	1.34639e+06	121965
A8K4A5	High	cDNA FLJ77482, highly similar to Human atrial natriuretic peptide clearance receptor (ANP C-receptor) mRNA [OS=Homo sapiens]	1	NPR3	21268.6	35430.8	-	9077.27	27290.6	-
A8K4C1	High	cDNA FLJ77904, highly similar to Homo sapiens ADP-ribosylation factor-like 15, mRNA [OS=Homo sapiens]	2	ARL15	94749.8	244090	195710	40438.5	188011	63914.9
A8K4K9	High	cDNA FLJ76169 [OS=Homo sapiens]	9	EMC2	1.67723e+06	1.67053e+06	1.30791e+06	715831	1.28672e+06	427138
A8K4T9	High	cDNA FLJ77421, highly similar to Homo sapiens autoantigen p542 mRNA [OS=Homo sapiens]	1	RALY	26401.2	42581.6	-	11267.8	32798.4	-
A8K4V4	High	cDNA FLJ76392, highly similar to Homo sapiens mitochondrial ribosomal protein L43 (MRPL43), transcript variant 1, mRNA [OS=Homo sapiens]	1	MRPL43	111642	59771.7	59590.3	47648.1	46039.1	19461
A8K4W0	High	40S ribosomal protein S3a [OS=Homo sapiens]	1	RPS3A	157207	134249	144935	67094.6	103406	47332.9
A8K525	High	cDNA FLJ76817, highly similar to Homo sapiens non-POU domain containing, octamer-binding (NONO), mRNA [OS=Homo sapiens]	14	NONO	684115	4.61029e+06	1.71077e+06	291975	3.55107e+06	558701
A8K5C5	High	cDNA FLJ77534, highly similar to Homo sapiens membrane protein, palmitoylated 5 (MAGUK p55 subfamily member 5) (MPP5), mRNA [OS=Homo sapiens]	14	MPP5	366281	3.23774e+06	1.29236e+06	156326	2.49387e+06	422059
A8K5D5	High	cDNA FLJ76832, highly similar to Homo sapiens mitochondrial ribosomal protein L19 (MRPL19), mRNA [OS=Homo sapiens]	4	MRPL19	190159	129398	25793.6	81158.5	99668.5	8423.68
A8K5H7	High	cDNA FLJ77542, highly similar to Homo sapiens YME1-like 1 (S. cerevisiae) (YME1L1), transcript variant 3, mRNA [OS=Homo sapiens]	7	YME1L1	39931.5	122058	38386	17042.5	94015.3	12536.1
A8K5K5	High	Eukaryotic translation initiation factor 3 subunit G [OS=Homo sapiens]	1	EIF3G	46831.3	26552.6	40401.9	19987.2	20452.1	13194.4
A8K5U9	High	cDNA FLJ75056, highly similar to Homo sapiens phosphatidylinositol binding clathrin assembly protein (PICALM), mRNA [OS=Homo sapiens]	7	PICALM	562024	1.22673e+06	605049	239868	944890	197597
A8K651	High	cDNA FLJ75700, highly similar to Homo sapiens complement component 1, q subcomponent binding protein (C1QBP), nuclear gene encoding mitochondrial protein, mRNA [OS=Homo sapiens]	5	C1QBP	3.21063e+06	3.15024e+06	3.61718e+06	1.37027e+06	2.42647e+06	1.1813e+06
A8K690	High	cDNA FLJ76863, highly similar to Homo sapiens stress-induced-phosphoprotein 1 (Hsp70/Hsp90-organizing protein) (STIP1), mRNA [OS=Homo sapiens]	2	STIP1	78174.2	88018.9	223357	33364.2	67796.5	72943.9
A8K6A5	High	cDNA FLJ77742, highly similar to Homo sapiens integrin, alpha 5 (fibronectin receptor, alpha polypeptide), mRNA [OS=Homo sapiens]	12	ITGA5	2.07778e+06	2.18657e+06	2.53843e+06	886781	1.68421e+06	829000
A8K6Q7	High	cDNA FLJ76889, highly similar to Homo sapiens butyrophilin, subfamily 3, member A3 (BTN3A3), transcript variant 1, mRNA [OS=Homo sapiens]	4	BTN3A3	1.35023e+06	1.06248e+06	2.02078e+06	576269	818376	659946
A8K6Q8	High	cDNA FLJ75881, highly similar to Homo sapiens transferrin receptor (p90, CD71) (TFRC), mRNA [OS=Homo sapiens]	8	TFRC	649829	499747	771098	277342	384930	251825
A8K6V6	High	N-acetylglucosamine-6-sulfatase [OS=Homo sapiens]	7	GNS	461620	474597	596781	197016	365558	194896
A8K6Y1	High	cDNA FLJ75526, highly similar to Homo sapiens proliferation-associated 2G4, 38kDa (PA2G4), mRNA [OS=Homo sapiens]	1	PA2G4	154063	47098.9	274633	65752.8	36277.9	89689.7
A8K7F6	High	cDNA FLJ78244, highly similar to Homo sapiens eukaryotic translation initiation factor 4A, isoform 1 (EIF4A1), mRNA [OS=Homo sapiens]	2	EIF4A1	1.53083e+06	858249	1.74736e+06	653347	661066	570651
A8K7N0	High	cDNA FLJ75556, highly similar to Homo sapiens ribosomal protein L14, mRNA [OS=Homo sapiens]	3	RPL14	368330	291242	514322	157201	224329	167967
A8K7Q1	High	cDNA FLJ77770, highly similar to Homo sapiens nucleobindin 1 (NUCB1), mRNA [OS=Homo sapiens]	9	NUCB1	813269	842029	1.55301e+06	347097	648572	507180
A8K7T4	High	cDNA FLJ75774, highly similar to Homo sapiens lectin, mannose-binding 2 (LMAN2), mRNA [OS=Homo sapiens]	11	LMAN2	4.55459e+06	6.21044e+06	5.09234e+06	1.94386e+06	4.78359e+06	1.66305e+06
A8K865	High	cDNA FLJ75789, highly similar to Homo sapiens synaptophysin-like 1 (SYPL1), transcript variant 1, mRNA [OS=Homo sapiens]	1	SYPL1	-	161276	21340.8	-	124223	6969.47
A8K8F9	High	Phosphoinositide phospholipase C [OS=Homo sapiens]	2	PLCD1	56758.5	-	138401	24224.1	-	45198.9
A8K8H0	High	chloride channel protein [OS=Homo sapiens]	6	CLCNKB	366370	449725	60513.2	156364	346400	19762.4
A8K916	High	AP complex subunit beta [OS=Homo sapiens]	22	AP2B1	2.96969e+06	8.97549e+06	5.04647e+06	1.26744e+06	6.91337e+06	1.64808e+06
A8K9B2	High	cDNA FLJ76725, highly similar to Homo sapiens L-2-hydroxyglutarate dehydrogenase (L2HGDH), mRNA [OS=Homo sapiens]	6	L2HGDH	388762	273816	160128	165921	210907	52294.5
A8K9J6	High	cDNA FLJ78024 [OS=Homo sapiens]	2	CD276	39030.8	56874.5	96459.9	16658.1	43807.6	31501.9
A8K9K6	High	cDNA FLJ76962, highly similar to Homo sapiens nucleolar protein 5A (56kDa with KKE/D repeat) (NOL5A), mRNA [OS=Homo sapiens]	5	NOP56	67724	310428	77018.4	28904.1	239107	25152.6
A8K9T3	High	cDNA FLJ76467, highly similar to Homo sapiens acyl-CoA synthetase long-chain family member 1 (ACSL1), mRNA [OS=Homo sapiens]	32	ACSL1	1.75092e+07	1.8028e+07	1.02182e+07	7.4728e+06	1.38861e+07	3.33707e+06
A8K9X0	High	Protein YIPF [OS=Homo sapiens]	1	YIPF6	172517	168260	129370	73628.8	129602	42249.5
A8KA23	High	cDNA FLJ77244, highly similar to Homo sapiens G protein-coupled receptor 157 (GPR157), mRNA [OS=Homo sapiens]	1	GPR157	283290	52720	144677	120906	40607.5	47248.4
A8KA83	High	cDNA FLJ78586, highly similar to Homo sapiens VAMP (vesicle-associated membrane protein)-associated protein A, 33kDa (VAPA), mRNA [OS=Homo sapiens]	9	VAPA	125389	5.38201e+06	203364	53515.1	4.14549e+06	66414.7
A8KAH1	High	cDNA FLJ75839, highly similar to Homo sapiens phosphatidylserine synthase 1 (PTDSS1), mRNA [OS=Homo sapiens]	4	PTDSS1	375825	378042	357819	160399	291187	116856
A8KAH7	High	cDNA FLJ75444, highly similar to Homo sapiens protein kinase, cAMP-dependent, regulatory, type II, alpha (PRKAR2A), mRNA [OS=Homo sapiens]	7	PRKAR2A	453121	377238	861299	193389	290567	281283
A8MQ02	High	Afadin [OS=Homo sapiens]	1	MLLT4; AFDN	23065.5	14195.3	39603.7	9844.16	10934	12933.8
A8MTY9	High	Down syndrome critical region protein 3 [OS=Homo sapiens]	2	DSCR3	124692	16026.8	38551.3	53217.8	12344.6	12590.1
A8MUD9	High	60S ribosomal protein L7 [OS=Homo sapiens]	3	RPL7	367860	186339	408387	157000	143527	133371
A8MXL6	High	protein SEC13 homolog [OS=Homo sapiens]	1	SEC13	153787	157957	235071	65635	121667	76769.4
A8MXP9	High	Matrin-3 [OS=Homo sapiens]	7	MATR3	98549.8	701495	34465.4	42060.3	540326	11255.7
A8MXV4	High	nucleoside diphosphate-linked moiety X motif 19 [OS=Homo sapiens]	1	NUDT19	54040.4	41859.2	40254.3	23064.1	32242	13146.2
B0AZN7	High	cDNA, FLJ79477, highly similar to Protein-glutamine gamma-glutamyltransferase K [OS=Homo sapiens]	6	TGM1	233253	234721	348322	99550.8	180794	113755
B0AZU0	High	cDNA, FLJ79530, highly similar to Homo sapiens O-acyltransferase (membrane bound) domain containing 2 (OACT2), mRNA [OS=Homo sapiens]	1	MBOAT2	50151.6	89782.2	59230.9	21404.3	69154.7	19343.6
B0AZV0	High	cDNA, FLJ79540, highly similar to Serine-threonine kinase receptor-associatedprotein [OS=Homo sapiens]	1	STRAP	34912.5	17624.8	62631.5	14900.4	13575.5	20454.2
B0BCY8	High	aminopeptidase [OS=Homo sapiens]	30	ENPEP	4.49997e+07	4.77918e+07	4.47406e+07	1.92055e+07	3.68116e+07	1.46114e+07
B0QZ37	High	mRNA export factor [OS=Homo sapiens]	1	RAE1	-	28312.8	37697.6	-	21807.9	12311.3
B1AHC9	High	X-ray repair cross-complementing protein 6 [OS=Homo sapiens]	12	XRCC6	3.69866e+06	284330	1.44118e+06	1.57856e+06	219005	470661
B1AKM8	Medium	Phosphatidylserine decarboxylase proenzyme, mitochondrial [OS=Homo sapiens]	1	PISD	50079.1	10544.4	26978.2	21373.4	8121.82	8810.52
B1AKN6	High	Nuclear factor 1 [OS=Homo sapiens]	1	NFIA	77106.1	33577.5	103480	32908.3	25863	33794.5
B1AKY9	High	Sodium/potassium-transporting ATPase subunit alpha [OS=Homo sapiens]	4	ATP1A2	3.49974e+06	2.26851e+06	3.1183e+06	1.49366e+06	1.74732e+06	1.01837e+06
B1ALD5	Medium	Sodium/hydrogen exchanger 1 [OS=Homo sapiens]	1	SLC9A1	60763.5	89136.4	78503.1	25933.4	68657.2	25637.5
B1APM4	High	sterol O-acyltransferase 1 [OS=Homo sapiens]	2	SOAT1	42908.4	79391.9	54560.7	18313	61151.6	17818.4
B1PBA3	High	SKNY protein [OS=Homo sapiens]	4	SMPD4	77759.1	313667	115766	33187	241602	37806.7
B2BKJ3	High	Mitochondrial serine protease [OS=Homo sapiens]	1	HTRA2	112007	127906	157281	47803.6	98519.2	51364.8
B2R5M9	High	cDNA, FLJ92537, highly similar to Homo sapiens procollagen-lysine, 2-oxoglutarate 5-dioxygenase (lysine hydroxylase, Ehlers-Danlos syndrome type VI) (PLOD), mRNA [OS=Homo sapiens]	4	PLOD1	132841	370294	199381	56695.4	285219	65113.9
B2R5U1	High	cDNA, FLJ92620, highly similar to Homo sapiens staphylococcal nuclease domain containing 1 (SND1),mRNA [OS=Homo sapiens]	10	SND1	375418	542416	285942	160226	417796	93382.7
B2R604	High	cDNA, FLJ92713, highly similar to Homo sapiens potassium inwardly-rectifying channel, subfamily J, member 10 (KCNJ10), mRNA [OS=Homo sapiens]	1	KCNJ10	105007	35364	-	44816.2	27239.1	-
B2R642	High	cDNA, FLJ92775, highly similar to Homo sapiens melanoma cell adhesion molecule (MCAM), mRNA [OS=Homo sapiens]	12	MCAM	2.18365e+06	1.978e+06	1.62137e+06	931965	1.52356e+06	529506
B2R659	High	cDNA, FLJ92803, highly similar to Homo sapiens hydroxysteroid (17-beta) dehydrogenase 4 (HSD17B4), mRNA [OS=Homo sapiens]	32	HSD17B4	2.20492e+07	2.18574e+07	2.05857e+07	9.41045e+06	1.68356e+07	6.72286e+06
B2R6C4	High	receptor expression-enhancing protein [OS=Homo sapiens]	5	REEP5	4.16124e+06	4.20594e+06	3.06527e+06	1.77598e+06	3.23963e+06	1.00106e+06
B2R6K4	High	cDNA, FLJ92996, highly similar to Homo sapiens guanine nucleotide binding protein (G protein), beta polypeptide 1 (GNB1), mRNA [OS=Homo sapiens]	6	GNB1	8.56916e+06	1.08828e+07	1.21634e+07	3.65725e+06	8.38247e+06	3.97231e+06
B2R6S9	High	cDNA, FLJ93097, highly similar to Homo sapiens low density lipoprotein receptor-related protein associated protein 1 (LRPAP1), mRNA [OS=Homo sapiens]	3	LRPAP1	11371.8	104400	43891.9	4853.38	80414.3	14334.2
B2R6V9	High	cDNA, FLJ93141, highly similar to Homo sapiens coagulation factor XIII, A1 polypeptide (F13A1), mRNA [OS=Homo sapiens]	5	F13A1	181976	-	67520.1	77666.1	-	22050.7
B2R6W1	High	cDNA, FLJ93143, highly similar to Homo sapiens complement component 7 (C7), mRNA [OS=Homo sapiens]	7	C7	303364	280534	322095	129474	216081	105190
B2R6Z9	High	cDNA, FLJ93200, highly similar to Homo sapiens dolichyl-phosphate (UDP-N-acetylglucosamine)N- acetylglucosaminephosphotransferase 1 (GlcNAc-1-P transferase)(DPAGT1), mRNA [OS=Homo sapiens]	1	DPAGT1	44511.5	93139.3	78353.5	18997.2	71740.5	25588.7
B2R720	High	Phospholipid scramblase [OS=Homo sapiens]	3	PLSCR4	273994	253995	279923	116939	195640	91417.3
B2R745	High	cDNA, FLJ93277, highly similar to Homo sapiens solute carrier family 30 (zinc transporter), member 9(SLC30A9), mRNA [OS=Homo sapiens]	4	SLC30A9	528020	418305	277451	225355	322199	90609.7
B2R761	High	cDNA, FLJ93299, highly similar to Homo sapiens sterol carrier protein 2 (SCP2), mRNA [OS=Homo sapiens]	14	SCP2	3.9348e+06	2.97704e+06	3.42081e+06	1679345	2.29306e+06	1.11717e+06
B2R769	High	aminopeptidase [OS=Homo sapiens]	14	ERAP2	635181	2.16883e+06	1.11614e+06	271091	1.67054e+06	364507
B2R7B5	High	cDNA, FLJ93365, highly similar to Homo sapiens KH domain containing, RNA binding, signal transduction associated 1 (KHDRBS1), mRNA [OS=Homo sapiens]	1	KHDRBS1	-	19444.3	41019.6	-	14976.9	13396.2
B2R7G6	High	cDNA, FLJ93437, highly similar to Homo sapiens histidyl-tRNA synthetase-like (HARSL), mRNA [OS=Homo sapiens]	4	HARS2	628789	697309	1.27472e+06	268363	537102	416298
B2R7I9	High	cDNA, FLJ93464, highly similar to Homo sapiens RAB7, member RAS oncogene family-like 1 (RAB7L1), mRNA [OS=Homo sapiens]	3	RAB7L1; RAB29	153865	319841	139054	65668.5	246357	45412.1
B2R7T8	High	cDNA, FLJ93598, highly similar to Homo sapiens capping protein (actin filament) muscle Z-line, beta (CAPZB), mRNA [OS=Homo sapiens]	9	CAPZB	2.65597e+06	2.70851e+06	4.25815e+06	1.13355e+06	2.08623e+06	1.39062e+06
B2R806	High	Eukaryotic translation initiation factor 3 subunit E [OS=Homo sapiens]	3	EIF3E	152384	121687	282875	65036.2	93729.3	92381.2
B2R888	High	Monocyte differentiation antigen CD14 [OS=Homo sapiens]	4	CD14	99274.3	238789	329106	42369.5	183927	107479
B2R8A2	High	cDNA, FLJ93804, highly similar to Homo sapiens gp25L2 protein (HSGP25L2G), mRNA [OS=Homo sapiens]	9	TMED9	5.77895e+06	6.92506e+06	5.82779e+06	2.46641e+06	5.33403e+06	1.90324e+06
B2R8R5	High	cDNA, FLJ94025, highly similar to Homo sapiens tripartite motif-containing 28 (TRIM28), mRNA [OS=Homo sapiens]	2	TRIM28	70511.8	61599.6	80807.5	30093.9	47447	26390.1
B2R8Z8	High	cDNA, FLJ94136, highly similar to Homo sapiens synaptotagmin binding, cytoplasmic RNA interacting protein (SYNCRIP), mRNA [OS=Homo sapiens]	2	SYNCRIP	30918	21260.1	67390.4	13195.6	16375.6	22008.3
B2R920	High	cDNA, FLJ94170, highly similar to Homo sapiens glutathione S-transferase A2 (GSTA2), mRNA [OS=Homo sapiens]	1	GSTA2	3.4079e+07	8.01587e+06	3.82708e+07	1.45447e+07	6.17422e+06	1.24984e+07
B2R921	High	cDNA, FLJ94171, highly similar to Homo sapiens solute carrier family 25 (mitochondrial carrier; ornithine transporter) member 15 (SLC25A15), nuclear gene encoding mitochondrial protein, mRNA [OS=Homo sapiens]	3	SLC25A15	154227	131470	90986.4	65823	101264	29714.3
B2R932	High	cDNA, FLJ94187, highly similar to Homo sapiens CD99 antigen (CD99), mRNA [OS=Homo sapiens]	1	CD99	117796	295174	409757	50274.6	227358	133818
B2R9H8	High	cDNA, FLJ94398, highly similar to Homo sapiens solute carrier family 5 (iodide transporter), member 8 (SLC5A8), mRNA [OS=Homo sapiens]	1	SLC5A8	27318	27945.5	13725.6	11659.1	21525	4482.5
B2R9J4	High	cDNA, FLJ94423, highly similar to Homo sapiens mitochondrial ribosomal protein L23 (MRPL23), nuclear gene encoding mitochondrial protein, mRNA [OS=Homo sapiens]	1	MRPL23	68738.7	46686	-	29337.2	35959.9	-
B2R9K8	High	cDNA, FLJ94440, highly similar to Homo sapiens chaperonin containing TCP1, subunit 6A (zeta 1)(CCT6A), mRNA [OS=Homo sapiens]	9	CCT6A	2.39214e+06	1.23491e+06	2.59778e+06	1.02095e+06	951187	848383
B2R9T9	High	cDNA, FLJ94551 [OS=Homo sapiens]	5	TMEM109	9.03816e+06	1.1972e+07	9.35991e+06	3.85742e+06	9.2214e+06	3.05676e+06
B2RA56	High	Nicalin [OS=Homo sapiens]	11	NCLN	6.08582e+06	3.30555e+06	3.7292e+06	2.59738e+06	2.5461e+06	1.21788e+06
B2RAF9	High	Suppressor of tumorigenicity 14 protein homolog [OS=Homo sapiens]	3	ST14	97236.5	50078.5	26318.3	41499.8	38572.9	8595.03
B2RAK1	High	cDNA, FLJ94965, highly similar to Homo sapiens leucyl/cystinyl aminopeptidase (LNPEP), mRNA [OS=Homo sapiens]	15	LNPEP	2.11949e+06	2.40783e+06	2.09073e+06	904583	1.85463e+06	682791
B2RAQ8	High	cDNA, FLJ95058, highly similar to Homo sapiens carnitine palmitoyltransferase 1A (liver) (CPT1A),nuclear gene encoding mitochondrial protein, mRNA [OS=Homo sapiens]	22	CPT1A	1.49805e+07	1.00826e+07	8.56459e+06	6.39355e+06	7.76611e+06	2.79702e+06
B2RBD5	High	tubulin beta chain [OS=Homo sapiens]	2	TUBB3	43239.5	81741	75075.2	18454.3	62961	24518
B2RBE0	High	cDNA, FLJ95462, highly similar to Homo sapiens fatty-acid-Coenzyme A ligase, long-chain 3 (FACL3),mRNA [OS=Homo sapiens]	17	ACSL3	2.5805e+06	2.64308e+06	2.46983e+06	1.10134e+06	2.03583e+06	806595
B2RBJ5	High	alanine--glyoxylate aminotransferase 2 [OS=Homo sapiens]	7	AGXT2	670116	233625	870313	286001	179950	284226
B2RC95	High	cDNA, FLJ95923, highly similar to Homo sapiens frizzled homolog 1 (Drosophila) (FZD1), mRNA [OS=Homo sapiens]	2	FZD1	157876	100397	133223	67380.4	77330.6	43507.8
B2RCG5	High	Flavin-containing monooxygenase [OS=Homo sapiens]	18	FMO1	7.93288e+06	9.66245e+06	4.42776e+06	3.38569e+06	7.44249e+06	1.44602e+06
B2RCM5	High	cDNA, FLJ96160, highly similar to Homo sapiens EGF-containing fibulin-like extracellular matrix protein 2 (EFEMP2), mRNA [OS=Homo sapiens]	1	EFEMP2	271606	176497	478880	115919	135947	156392
B2RCP1	High	cDNA, FLJ96185, highly similar to Homo sapiens guanylate cyclase 1, soluble, beta 3 (GUCY1B3), mRNA [OS=Homo sapiens]	1	GUCY1B3	22069.2	37766.3	22815	9418.97	29089.5	7450.92
B2RCQ6	High	cDNA, FLJ96222, highly similar to Homo sapiens betaine-homocysteine methyltransferase (BHMT), mRNA [OS=Homo sapiens]	3	BHMT	2.85542e+07	1.0829e+07	4.35712e+07	1.21867e+07	8.34103e+06	1.42295e+07
B2RD22	Medium	cDNA, FLJ96422, highly similar to Homo sapiens transmembrane protein with EGF-like and two follistatin-like domains 2 (TMEFF2), mRNA [OS=Homo sapiens]	1	TMEFF2	2.60506e+06	1.08664e+06	948324	1.11182e+06	836981	309703
B2RD31	High	tetraspanin [OS=Homo sapiens]	2	TSPAN2	235184	241815	253467	100375	186258	82777.1
B2RDD7	High	Protein arginine N-methyltransferase 5 [OS=Homo sapiens]	2	PRMT5	102393	29683.6	78930.1	43700.5	22863.8	25777
B2RDE1	High	cDNA, FLJ96568, highly similar to Homo sapiens tropomyosin 3 (TPM3), mRNA [OS=Homo sapiens]	3	TPM3	334138	239892	449054	142608	184777	146652
B2RDH3	High	cDNA, FLJ96609, highly similar to Homo sapiens angiotensin II receptor-like 1 (AGTRL1), mRNA [OS=Homo sapiens]	2	APLNR	-	80889.1	22134.5	-	62304.8	7228.69
B2RDW0	High	cDNA, FLJ96792, highly similar to Homo sapiens calmodulin 2 (phosphorylase kinase, delta) (CALM2), mRNA [OS=Homo sapiens]	7	CALM2	4.5635e+06	3.94116e+06	6.70226e+06	1.94767e+06	3.03568e+06	2.18882e+06
B2RDX5	High	cDNA, FLJ96812, highly similar to Homo sapiens threonyl-tRNA synthetase (TARS), mRNA [OS=Homo sapiens]	3	TARS	138795	-	234882	59236.7	-	76707.7
B2RE36	High	cDNA, FLJ96903 [OS=Homo sapiens]	7	CCDC90B	636672	455053	399913	271727	350504	130603
B2RMS9	High	Inter-alpha (Globulin) inhibitor H4 (Plasma Kallikrein-sensitive glycoprotein) [OS=Homo sapiens]	2	ITIH4	96978	74533.7	71455.3	41389.5	57409.5	23335.8
B2RUU3	Medium	Dedicator of cytokinesis 1 [OS=Homo sapiens]	1	DOCK1	58468.2	-	40501.4	24953.8	-	13226.9
B3KM26	High	cDNA FLJ10050 fis, clone HEMBA1001257, highly similar to Alpha-methylacyl-CoA racemase [OS=Homo sapiens]	3	AMACR	657749	712026	1.13662e+06	280722	548438	371197
B3KM55	High	cDNA FLJ10336 fis, clone NT2RM2000691, highly similar to Homo sapiens ARP3 actin-related protein 3 homolog B (yeast) (ACTR3B), mRNA [OS=Homo sapiens]	1	ACTR3B	-	37667.7	80030.3	-	29013.5	26136.3
B3KM80	High	nucleolin, isoform CRA_c [OS=Homo sapiens]	2	NCL	270927	32021.2	161254	115629	24664.3	52662.3
B3KM97	High	cDNA FLJ10554 fis, clone NT2RP2002385, highly similar to Synaptic glycoprotein SC2 [OS=Homo sapiens]	8	TECR	4.98703e+06	4.40047e+06	2.71994e+06	2.12843e+06	3.38946e+06	888278
B3KMB3	High	cDNA FLJ10629 fis, clone NT2RP2005620, highly similar to Epsin-2 [OS=Homo sapiens]	2	EPN2	-	205259	22618.7	-	158100	7386.8
B3KMH8	High	Autophagy protein 5 [OS=Homo sapiens]	1	ATG5	54936.9	106120	88646.6	23446.7	81738.8	28950.2
B3KMR6	High	cDNA FLJ12440 fis, clone NT2RM1000131, highly similar to Homo sapiens transmembrane protein 63A (TMEM63A), mRNA [OS=Homo sapiens]	4	TMEM63A	139120	231084	81595.1	59375.5	177992	26647.3
B3KMV8	High	cDNA FLJ12766 fis, clone NT2RP2001520, highly similar to Calcium-binding mitochondrial carrier protein Aralar1 [OS=Homo sapiens]	20	SLC25A12	9.89307e+06	5.4908e+06	5.2795e+06	4.22229e+06	4.22928e+06	1.72418e+06
B3KN09	High	cDNA FLJ13173 fis, clone NT2RP3003831, highly similar to Endonuclease G-like 1 [OS=Homo sapiens]	2	EXOG	82154.5	43721.2	52344.4	35062.9	33676.2	17094.6
B3KN15	High	cDNA FLJ13198 fis, clone NT2RP3004454, highly similar to Heparan sulfate 2-O-sulfotransferase 1 [OS=Homo sapiens]	2	HS2ST1	49760.3	56386.5	31364.5	21237.3	43431.6	10243
B3KNG6	High	cDNA FLJ14554 fis, clone NT2RM2001839, highly similar to Calumenin [OS=Homo sapiens]	7	CALU	413924	852156	925466	176660	656373	302238
B3KNH5	High	cDNA FLJ14622 fis, clone NT2RP2000147, highly similar to Adaptor-related protein complex 1 mu-1 subunit [OS=Homo sapiens]	5	AP1M1	235903	268105	423779	100682	206508	138397
B3KNK4	High	phosphatidate cytidylyltransferase [OS=Homo sapiens]	5	CDS2	703669	1.57926e+06	1.11358e+06	300321	1.21643e+06	363673
B3KNZ3	High	LIM and senescent cell antigen-like-containing domain protein [OS=Homo sapiens]	2	LIMS2	448769	527192	860135	191531	406069	280903
B3KPU4	High	cDNA FLJ32196 fis, clone PLACE6002668, highly similar to Homo sapiens sorbin and SH3 domain containing 2 (SORBS2), transcript variant 1, mRNA [OS=Homo sapiens]	1	SORBS2	-	56493.2	21521.3	-	43513.8	7028.42
B3KPZ7	High	cDNA FLJ32517 fis, clone SMINT1000117, highly similar to Pyruvate dehydrogenase (lipoamide)-phosphatase 1 [OS=Homo sapiens]	10	PDP1	398674	857187	665412	170151	660248	217310
B3KQB4	High	PRA1 family protein [OS=Homo sapiens]	7	ARL6IP5	5.25389e+06	7.22032e+06	3.92503e+06	2.24232e+06	5.56144e+06	1.28183e+06
B3KQC8	High	cDNA FLJ90233 fis, clone NT2RM2000514, highly similar to F-box only protein 21 [OS=Homo sapiens]	3	FBXO21	154136	120445	175603	65784.2	92772.5	57348.5
B3KQQ7	High	cDNA PSEC0037 fis, clone NT2RP1000800, highly similar to N-acetyllactosaminidebeta-1,3-N-acetylglucosaminyltransferase [OS=Homo sapiens]	4	B3GNT1; B4GAT1	157001	395244	207289	67006.7	304436	67696.3
B3KQS1	High	cDNA PSEC0102 fis, clone NT2RP2003127, highly similar to Prominin-1 [OS=Homo sapiens]	2	PROM1	120065	47305.1	-	51243	36436.7	-
B3KQT9	High	Protein disulfide-isomerase [OS=Homo sapiens]	25	PDIA3	3.39205e+07	5.80182e+07	5.35711e+07	1.4477e+07	4.46885e+07	1.74952e+07
B3KR68	High	cDNA FLJ33760 fis, clone BRCOC2000004, highly similar to Vesicular inhibitory amino acid transporter [OS=Homo sapiens]	1	SLC32A1	19273.1	65529.3	24857.6	8225.6	50473.9	8117.99
B3KR70	High	cDNA FLJ33764 fis, clone BRCOC2000360, highly similar to Vacuolar ATP synthase subunit S1 [OS=Homo sapiens]	3	ATP6AP1	653369	585137	387704	278853	450701	126616
B3KRG8	High	lipase [OS=Homo sapiens]	2	LIPA	118491	220380	267530	50571.1	169748	87369.8
B3KRJ2	High	cDNA FLJ34406 fis, clone HEART1000149, highly similar to D-2-hydroxyglutarate dehydrogenase, mitochondrial [OS=Homo sapiens]	1	D2HGDH	35515.2	38043	43409.6	15157.6	29302.6	14176.7
B3KRM3	High	cDNA FLJ34560 fis, clone KIDNE2001857, highly similar to Homo sapiens solute carrier family 22, member 6, transcript variant 2, mRNA [OS=Homo sapiens]	7	SLC22A6	633241	1.37323e+06	431147	270262	1.05773e+06	140804
B3KRN4	High	cDNA FLJ34625 fis, clone KIDNE2015244, highly similar to Serine protease HTRA1 [OS=Homo sapiens]	1	HTRA1	22713.6	82227.6	30544.1	9694.01	63335.8	9975.07
B3KRT6	High	cDNA FLJ34908 fis, clone NT2RI2006294, highly similar to Homo sapiens stimulated by retinoic acid gene 6 homolog (STRA6), mRNA [OS=Homo sapiens]	1	STRA6	15291.3	60233.3	29067.2	6526.21	46394.7	9492.77
B3KSH1	High	Eukaryotic translation initiation factor 3 subunit F [OS=Homo sapiens]	2	EIF3F	112980	74265.7	176426	48219.2	57203.1	57617
B3KSI3	High	branched-chain-amino-acid aminotransferase [OS=Homo sapiens]	8	BCAT2	1.25322e+06	1.3109e+06	1.39781e+06	534866	1.00972e+06	456496
B3KSS4	High	cDNA FLJ36858 fis, clone ASTRO2015185, highly similar to POLIOVIRUS RECEPTOR [OS=Homo sapiens]	3	PVR	309304	333024	357111	132009	256511	116625
B3KT23	High	cDNA FLJ37500 fis, clone BRAWH2016166, highly similar to Tetratricopeptide repeat protein 19 [OS=Homo sapiens]	3	TTC19	140893	45548.5	32498.8	60132.2	35083.7	10613.5
B3KT70	High	cDNA FLJ37767 fis, clone BRHIP2024911, highly similar to Homo sapiens hexokinase domain containing 1 (HKDC1), mRNA [OS=Homo sapiens]	23	HKDC1	972506	1.13167e+06	961462	415058	871666	313994
B3KTN5	High	cDNA FLJ38538 fis, clone HCHON2001407, highly similar to LanC-like protein 2 [OS=Homo sapiens]	2	LANCL2	125771	90603.9	91778.5	53678.3	69787.6	29973
B3KTT0	High	cDNA FLJ38675 fis, clone IMR322000243, highly similar to Nucleoporin Nup43 [OS=Homo sapiens]	2	NUP43	21837.7	89224	27871.4	9320.16	68724.7	9102.25
B3KTV4	High	adenylosuccinate synthetase [OS=Homo sapiens]	1	ADSSL1	53434.8	12308.5	66262.7	22805.6	9480.58	21640.1
B3KUD0	High	cDNA FLJ39571 fis, clone SKMUS2002084 [OS=Homo sapiens]	2	TMEM177	386283	115027	93399.9	164863	88599.6	30502.5
B3KUI8	High	cDNA FLJ39985 fis, clone STOMA2000279, highly similar to Homo sapiens LR8 protein (LR8), mRNA [OS=Homo sapiens]	3	TMEM176B	16278.3	31013.2	-	6947.44	23887.9	-
B3KUJ0	High	cDNA FLJ39996 fis, clone STOMA2002166, highly similar to Splicing factor 3B subunit 4 [OS=Homo sapiens]	2	SF3B4	-	99713.4	39590.5	-	76804.2	12929.5
B3KUZ8	High	aspartate aminotransferase [OS=Homo sapiens]	18	GOT2	1.97161e+07	2.58887e+07	1.68828e+07	8.41469e+06	1.99408e+07	5.51357e+06
B3KVY9	High	cDNA FLJ41755 fis, clone HSYRA2009102, highly similar to Adenosine 3'-phospho 5'-phosphosulfate transporter 1 [OS=Homo sapiens]	1	SLC35B2	73431.3	-	49319.4	31339.9	-	16106.7
B3KW38	High	cDNA FLJ42082 fis, clone TCERX2000171, highly similar to CLAUDIN-4 [OS=Homo sapiens]	1	CLDN4	112577	68621.8	51466.7	48047	52855.9	16808
B3KW93	High	Sodium/potassium-transporting ATPase subunit alpha [OS=Homo sapiens]	2	ATP1A2	149450	55444.5	38722.1	63784	42706.1	12645.9
B3KX11	High	T-complex protein 1 subunit gamma [OS=Homo sapiens]	19	CCT3	3.74436e+06	2.16484e+06	5.03451e+06	1.59806e+06	1.66746e+06	1.64417e+06
B3KX16	High	cDNA FLJ44469 fis, clone UTERU2026090, highly similar to Cartilage-associated protein [OS=Homo sapiens]	2	CRTAP	566994	810328	449199	241989	624155	146699
B3KX19	High	cDNA FLJ44500 fis, clone UTERU3000828, highly similar to 116 kDa U5 small nuclear ribonucleoprotein component [OS=Homo sapiens]	6	EFTUD2	97552.1	389240	200464	41634.5	299812	65467.3
B3KX82	High	cDNA FLJ44964 fis, clone BRAWH2016209, highly similar to Homo sapiens synovial apoptosis inhibitor 1, synoviolin (SYVN1), transcript variant 2, mRNA [OS=Homo sapiens]	4	SYVN1	247623	415153	192442	105684	319771	62847.5
B3KX99	High	cDNA FLJ45019 fis, clone BRAWH3015825 [OS=Homo sapiens]	1	TADA2B	2.38735e+06	1.72281e+06	3.05497e+06	1.0189e+06	1.32699e+06	997692
B3KXH8	High	cDNA FLJ45417 fis, clone BRHIP3033811, highly similar to Sorting nexin-9 [OS=Homo sapiens]	7	SNX9	24881.9	469160	227748	10619.4	361370	74377.8
B3KXS3	High	cDNA FLJ45947 fis, clone PLACE7007379, highly similar to Homo sapiens carboxypeptidase Z (CPZ), transcript variant 2, mRNA [OS=Homo sapiens]	1	CPZ	20835.1	29351.2	13462.2	8892.25	22607.8	4396.48
B3KXW5	High	cDNA FLJ46199 fis, clone TESTI4007965, highly similar to AP-1 complex subunit gamma-1 [OS=Homo sapiens]	5	AP1G1	490778	379086	454611	209460	291991	148467
B3KXZ1	High	alpha-1,2-mannosidase [OS=Homo sapiens]	2	MAN1B1	24177.1	17291.5	56757.8	10318.6	13318.8	18535.9
B3KY04	High	cDNA FLJ46506 fis, clone THYMU3030752, highly similar to BTB/POZ domain-containing protein KCTD12 [OS=Homo sapiens]	3	KCTD12	235715	188591	405154	100601	145262	132315
B3KY28	High	cDNA FLJ46689 fis, clone TRACH3012106, highly similar to Band 4.1-like protein 3 [OS=Homo sapiens]	3	EPB41L3	336646	374855	383658	143678	288732	125295
B3KY60	High	cDNA FLJ16777 fis, clone BRHIP2029567, highly similar to Cell division cycle 5-like protein [OS=Homo sapiens]	2	CDC5L	649086	361581	354800	277025	278507	115870
B3KY94	High	CDP-diacylglycerol--inositol 3-phosphatidyltransferase [OS=Homo sapiens]	5	CDIPT	2.84087e+06	3.18321e+06	3.43668e+06	1.21246e+06	2.45186e+06	1.12235e+06
B3LEU8	High	TMEM214 protein [OS=Homo sapiens]	9	TMEM214	134226	882746	235449	57286.6	679934	76893
B3WFC8	High	MHC class I antigen [OS=Homo sapiens]	1	HLA-A	2.2234e+06	23659	61419.5	948929	18223.3	20058.4
B4DDF7	High	cDNA FLJ53296, highly similar to Serine/threonine-protein phosphatase 2A 65 kDa regulatory subunit A alpha isoform [OS=Homo sapiens]	11	PPP2R1A	1.79047e+06	1.33458e+06	2.20939e+06	764159	1.02796e+06	721543
B4DDI8	High	cDNA FLJ53704, moderately similar to Nascent polypeptide-associated complex subunit alpha [OS=Homo sapiens]	1	NACA	146968	60854.8	144429	62724.9	46873.4	47167.6
B4DDK9	High	cDNA FLJ55952, highly similar to Alpha-1,6-mannosyl-glycoprotein2-beta-N- acetylglucosaminyltransferase [OS=Homo sapiens]	1	MGAT2	20247.1	36438.7	-	8641.33	28066.9	-
B4DDM4	High	cDNA FLJ58500, highly similar to Cytoplasmic dynein 1 light intermediate chain 1 [OS=Homo sapiens]	1	DYNC1LI1	47026.5	28228.3	91220.2	20070.6	21742.8	29790.7
B4DDQ2	High	biglycan [OS=Homo sapiens]	3	BGN	336773	148339	228385	143732	114258	74585.9
B4DDS8	Medium	cDNA FLJ56686, moderately similar to FADD protein [OS=Homo sapiens]	1	FADD	65989.3	73372.8	25249.1	28163.7	56515.4	8245.85
B4DE91	High	cDNA FLJ55534, highly similar to 4-trimethylaminobutyraldehyde dehydrogenase [OS=Homo sapiens]	20	ALDH9A1	6.19466e+06	8.10803e+06	1.2591e+07	2.64384e+06	6.24521e+06	4.11197e+06
B4DEB0	High	cDNA FLJ56054, highly similar to 26S proteasome non-ATPase regulatory subunit 3 [OS=Homo sapiens]	4	PSMD3	362484	76515.2	355945	154705	58935.8	116245
B4DEH0	High	mitochondrial ribosomal protein L10, isoform CRA_d [OS=Homo sapiens]	2	MRPL10	147307	146448	88771.9	62869.5	112802	28991.1
B4DEM1	High	cDNA FLJ57952, highly similar to CMP-sialic acid transporter [OS=Homo sapiens]	1	SLC35A1	29003.9	40624.7	33424.3	12378.6	31291.2	10915.7
B4DEX8	High	S-adenosylmethionine synthase [OS=Homo sapiens]	3	MAT2A	217273	92852.1	408115	92730.3	71519.3	133282
B4DF27	High	cDNA FLJ59488, highly similar to Solute carrier family 13 member 3 [OS=Homo sapiens]	6	SLC13A3	1.29237e+06	3.67552e+06	1.4365e+06	551573	2.83106e+06	469133
B4DF70	High	cDNA FLJ60461, highly similar to Peroxiredoxin-2 [OS=Homo sapiens]	6	PRDX2	5.91307e+06	1.68345e+06	6.05582e+06	2.52366e+06	1.29668e+06	1.97771e+06
B4DFG0	High	Protein DEK [OS=Homo sapiens]	1	DEK	104015	61733.1	182722	44393	47549.9	59673.4
B4DFJ7	High	tetraspanin 31, isoform CRA_a [OS=Homo sapiens]	1	TSPAN31	96043	116182	92873.8	40990.4	89489	30330.7
B4DFL1	High	Dihydrolipoyl dehydrogenase [OS=Homo sapiens]	17	DLD	1.45927e+07	1.30888e+07	9.95406e+06	6.22804e+06	1.00816e+07	3.25079e+06
B4DFR2	High	cDNA FLJ59194, moderately similar to Dynein light chain 2A, cytoplasmic [OS=Homo sapiens]	1	DYNLRB1	62725.4	50363.4	108914	26770.7	38792.4	35569.2
B4DFZ0	High	Lipase maturation factor 1 [OS=Homo sapiens]	1	LMF1	126867	126090	76915.4	54146.1	97121.1	25119
B4DG47	High	cDNA FLJ56967, highly similar to Adapter-relatedprotein complex 1 beta-1 subunit [OS=Homo sapiens]	3	AP1B1	90236.1	175982	157776	38512.1	135550	51526.4
B4DGD0	High	cDNA FLJ50491, highly similar to Amyloid beta A4 protein (APP) (ABPP)(Alzheimer disease amyloid protein) (Cerebral vascularamyloid peptide) (CVAP) (Protease nexin-II) (PN-II)(APPI) (PreA4) [OS=Homo sapiens]	7	APP	678435	1.06482e+06	750656	289551	820176	245149
B4DGF6	High	cDNA FLJ59294, highly similar to HECT, UBA and WWE domain-containing protein 1 [OS=Homo sapiens]	2	HUWE1	96010.1	25627.8	81967.6	40976.4	19739.8	26769
B4DGM9	High	torsin family 1, member A (torsin A), isoform CRA_a [OS=Homo sapiens]	2	TOR1A	69346.5	106973	102520	29596.6	82396	33480.9
B4DH11	High	cDNA FLJ59883, highly similar to Protein OS-9 [OS=Homo sapiens]	1	OS9	32890.7	43605.7	24355.8	14037.5	33587.3	7954.11
B4DH29	Medium	DNA-directed RNA polymerase subunit beta [OS=Homo sapiens]	1	POLR2B	33038	29620.3	24220.6	14100.4	22815	7909.94
B4DH65	High	cDNA FLJ53323, highly similar to 2-oxoglutarate dehydrogenase E1 component, mitochondrial [OS=Homo sapiens]	1	OGDH	-	342118	225212	-	263516	73549.7
B4DHJ7	High	cDNA FLJ60537, highly similar to BCL2/adenovirus E1B 19 kDa protein-interacting protein 3 [OS=Homo sapiens]	1	BNIP3	31088.9	122101	51170.9	13268.5	94047.8	16711.4
B4DHQ9	High	cDNA FLJ51850, highly similar to T-cell immunomodulatory protein [OS=Homo sapiens]	1	ITFG1	63173.8	58589.3	39262.5	26962.1	45128.4	12822.3
B4DHW9	Medium	pantothenate kinase 4 [OS=Homo sapiens]	1	PANK4	23013.7	-	35941.8	9822.09	-	11737.9
B4DHY8	High	Elongation factor Ts, mitochondrial [OS=Homo sapiens]	3	TSFM	454730	149030	356612	194075	114790	116462
B4DI38	High	Adenylyl cyclase-associated protein [OS=Homo sapiens]	9	CAP1	2.27912e+06	1.25931e+06	5.88675e+06	972710	969984	1.92249e+06
B4DI59	High	cDNA FLJ59527 [OS=Homo sapiens]	1	FOXRED1	62470.2	13352.9	-	26661.8	10285.1	-
B4DIK4	High	Alpha-mannosidase [OS=Homo sapiens]	2	MAN2A2	29407.9	97193.9	76295.1	12551.1	74863.6	24916.4
B4DIK5	High	cDNA FLJ57991, highly similar to Caspase recruitment domain-containing protein9 [OS=Homo sapiens]	1	CARD9	200415	139341	316497	85535.7	107327	103361
B4DIP2	High	Erbin [OS=Homo sapiens]	2	ERBB2IP; ERBIN	40099.7	102229	68780.2	17114.3	78742.2	22462.2
B4DIX0	High	cDNA FLJ50778, highly similar to Protein flightless-1 homolog [OS=Homo sapiens]	2	FLII	75073.8	53734.1	111848	32041	41388.6	36527.4
B4DJ30	High	cDNA FLJ61290, highly similar to Neutral alpha-glucosidase AB [OS=Homo sapiens]	10	-	2.43549e+07	2.2612e+07	2.33022e+07	1.03945e+07	1.74169e+07	7.61002e+06
B4DJ79	High	cDNA FLJ55847 [OS=Homo sapiens]	1	C6orf120	49035.9	49066.7	-	20928.1	37793.6	-
B4DJB4	High	Isocitrate dehydrogenase [NAD] subunit, mitochondrial [OS=Homo sapiens]	12	IDH3A	5.39288e+06	6.51347e+06	6.69606e+06	2.30164e+06	5.01699e+06	2.1868e+06
B4DJI4	High	cDNA FLJ58065, highly similar to LIM and SH3 domain protein 1 [OS=Homo sapiens]	1	LASP1	43873.1	23015.2	41488.1	18724.7	17727.4	13549.2
B4DJQ5	High	cDNA FLJ59211, highly similar to Glucosidase 2 subunit beta [OS=Homo sapiens]	17	PRKCSH	8.77947e+06	1.6234e+07	8.67437e+06	3.74701e+06	1.25042e+07	2.83287e+06
B4DK32	High	cDNA FLJ61095, highly similar to Ubiquitin conjugation factor E4 A [OS=Homo sapiens]	3	UBE4A	108386	70767.8	36570.7	46258.2	54508.8	11943.2
B4DK83	High	Sodium/hydrogen exchanger [OS=Homo sapiens]	1	SLC9A6	88611.7	76679.2	74747.8	37818.8	59062.1	24411.1
B4DKJ0	High	cDNA FLJ58539, highly similar to Keratin, type II cytoskeletal 4 [OS=Homo sapiens]	13	KRT4	697188	1.71573e+06	1.53117e+06	297554	1.32154e+06	500050
B4DKM6	High	cDNA FLJ54305, highly similar to Serum paraoxonase/arylesterase 2 [OS=Homo sapiens]	10	PON2	313799	2.30162e+06	846756	133927	1.77282e+06	276533
B4DKS0	High	cDNA FLJ53381, highly similar to Monocarboxylate transporter 1 [OS=Homo sapiens]	2	SLC16A1	156497	258555	339065	66791.8	199152	110732
B4DL07	High	cDNA FLJ53353, highly similar to ATP-binding cassette sub-family D member 3 [OS=Homo sapiens]	12	ABCD3	3.07611e+06	1.89743e+06	1.86256e+06	1.31286e+06	1.4615e+06	608273
B4DL81	High	cDNA FLJ56369, highly similar to Homo sapiens phosphatidylglycerophosphate synthase 1 (PGS1), mRNA [OS=Homo sapiens]	1	PGS1	28126.5	46960	36954.7	12004.2	36170.9	12068.7
B4DLA1	High	cDNA FLJ53453, highly similar to EH-domain-containing protein 2 [OS=Homo sapiens]	5	EHD2	423179	124212	343926	180609	95674.5	112319
B4DLA4	High	cDNA FLJ60123, highly similar to Coiled-coil domain-containing protein 22 [OS=Homo sapiens]	1	CCDC22	32248.3	14779.3	38218.7	13763.3	11383.7	12481.4
B4DLC3	High	Claudin [OS=Homo sapiens]	2	CLDN1	189540	54753.2	143854	80894.4	42173.6	46979.9
B4DLE7	High	cDNA FLJ50983, highly similar to Homo sapiens lysocardiolipin acyltransferase (LYCAT), transcript variant 1, mRNA [OS=Homo sapiens]	2	LCLAT1	290394	208199	222171	123938	160365	72556.7
B4DLJ3	High	cDNA FLJ51495, highly similar to ADP-ribosylation factor 5 [OS=Homo sapiens]	1	ARF5	39730	12551.9	-	16956.5	9668.11	-
B4DLR8	High	NAD(P)H dehydrogenase [quinone] 1 [OS=Homo sapiens]	2	NQO1	255250	29840.7	386476	108939	22984.8	126215
B4DLV7	High	Rab GDP dissociation inhibitor [OS=Homo sapiens]	12	GDI2	4.29085e+06	1.62556e+06	5.98187e+06	1.8313e+06	1.25209e+06	1.95356e+06
B4DM05	High	cDNA FLJ51241, highly similar to Nidogen-1 [OS=Homo sapiens]	1	NID1	-	108438	43162.9	-	83524.1	14096.1
B4DM06	High	cDNA FLJ54072, highly similar to G-protein coupled receptor 56 [OS=Homo sapiens]	2	GPR56; ADGRG1	247070	192620	138017	105448	148366	45073.5
B4DM08	High	cDNA FLJ60021, moderately similar to Protein transport protein Sec61 subunit alpha isoform 1 [OS=Homo sapiens]	1	SEC61A1	37645.7	52783.4	72077	16066.9	40656.4	23538.9
B4DM21	High	cDNA FLJ58021, highly similar to Fragile X mental retardation syndrome-related protein 1 [OS=Homo sapiens]	2	FXR1	-	167614	12613.6	-	129105	4119.35
B4DM33	High	cDNA FLJ52068, highly similar to Microtubule-associated protein RP/EB family member 1 [OS=Homo sapiens]	1	MAPRE1	54803.5	25007.1	81880.6	23389.7	19261.7	26740.5
B4DM74	Medium	60S ribosomal protein L18a [OS=Homo sapiens]	1	RPL18A	55542.9	43395.5	66205.1	23705.3	33425.4	21621.2
B4DM97	High	cDNA FLJ55002, highly similar to Alpha-centractin [OS=Homo sapiens]	4	ACTR1A	797879	594781	1.2119e+06	340529	458130	395782
B4DN28	High	cDNA FLJ54639, highly similar to Integrin alpha-8 [OS=Homo sapiens]	28	ITGA8	1.5164e+07	1.81022e+07	1.95081e+07	6.4719e+06	1.39432e+07	6.37095e+06
B4DN31	High	cDNA FLJ55809 [OS=Homo sapiens]	10	CHID1	1.14194e+06	1.32961e+06	971205	487372	1.02413e+06	317176
B4DN41	High	cDNA FLJ53366, highly similar to Probable ATP-dependent RNA helicase DDX5 [OS=Homo sapiens]	4	DDX5	91094.5	178512	122868	38878.5	137499	40126.1
B4DN54	High	cDNA FLJ55111, highly similar to Sorting and assembly machinery component 50 homolog [OS=Homo sapiens]	1	SAMM50	849433	657665	441103	362532	506566	144055
B4DN59	High	cDNA FLJ52702, highly similar to Homo sapiens CD44 antigen (homing function and Indian blood group system) (CD44), transcript variant 4, mRNA [OS=Homo sapiens]	3	CD44	71977.6	208626	124392	30719.5	160694	40623.9
B4DN72	High	cDNA FLJ55910, highly similar to Keratin, type II cuticular Hb6 [OS=Homo sapiens]	12	KRT86	624498	810263	3.55577e+06	266531	624104	1.16124e+06
B4DNH1	High	Profilin [OS=Homo sapiens]	2	PFN2	161879	35250.9	235904	69088.8	27152	77041.3
B4DNL8	High	Galactosylgalactosylxylosylprotein 3-beta-glucuronosyltransferase [OS=Homo sapiens]	4	B3GAT3	162781	256007	193464	69473.8	197189	63181.3
B4DNN3	High	cDNA FLJ54453, highly similar to Glutaminyl-tRNA synthetase [OS=Homo sapiens]	3	QARS	99569.4	78661.5	140786	42495.5	60589	45977.8
B4DNR3	High	cDNA FLJ52710, highly similar to Abhydrolase domain-containing protein 14B [OS=Homo sapiens]	6	ABHD14B	2.11088e+06	993342	3.00333e+06	900909	765121	980828
B4DNW4	High	cDNA FLJ51915, highly similar to Aquaporin-1 [OS=Homo sapiens]	3	AQP1	3.3249e+06	8.81443e+06	3.07239e+06	1.41904e+06	6.78931e+06	1.00338e+06
B4DP06	High	cDNA FLJ57133, highly similar to Bifunctional purine biosynthesis protein PURH [OS=Homo sapiens]	7	ATIC	333333	129236	513913	142264	99544.1	167833
B4DP22	High	carboxypeptidase [OS=Homo sapiens]	4	SCPEP1	580709	320282	466020	247842	246697	152193
B4DP27	High	cDNA FLJ52153, highly similar to Transmembrane emp24 domain-containing protein 2 [OS=Homo sapiens]	5	TMED2	3.58217e+06	3.15764e+06	2.59083e+06	1.52884e+06	2.43217e+06	846114
B4DP80	High	NAD(P)H-hydrate epimerase [OS=Homo sapiens]	4	APOA1BP; NAXE	385279	287891	468355	164434	221748	152955
B4DPC7	High	cDNA FLJ55124, highly similar to Plasma serine protease inhibitor [OS=Homo sapiens]	4	SERPINA5	958778	185220	587401	409199	142666	191833
B4DPH5	High	cDNA FLJ55496, highly similar to Aminopeptidase N [OS=Homo sapiens]	1	ANPEP	-	1.4263e+06	522569	-	1.09861e+06	170660
B4DPI4	High	cDNA FLJ53456, highly similar to Homo sapiens solute carrier family 22 (organic anion transporter), member 8 (SLC22A8), mRNA [OS=Homo sapiens]	7	SLC22A8	1.08402e+06	2.8149e+06	885080	462650	2.16818e+06	289049
B4DPK2	High	cDNA FLJ59729, highly similar to DnaJ homolog subfamily C member 11 [OS=Homo sapiens]	13	DNAJC11	3.31281e+06	2.22177e+06	1.01939e+06	1.41388e+06	1.71132e+06	332914
B4DPP3	High	cDNA FLJ57846, highly similar to Homo sapiens acyl-CoA synthetase medium-chain family member 2 (ACSM2), nuclear gene encoding mitochondrial protein, mRNA [OS=Homo sapiens]	1	ACSM2A	88157.3	49654.6	50389.7	37624.9	38246.4	16456.2
B4DPW5	High	cDNA FLJ59374, highly similar to Homo sapiens caldesmon 1 (CALD1), transcript variant 2, mRNA [OS=Homo sapiens]	2	CALD1	80231.8	135398	201364	34242.3	104290	65761.3
B4DPY0	High	Glutathione peroxidase [OS=Homo sapiens]	2	GPX8	166622	169996	178524	71112.9	130939	58302.2
B4DPY2	High	cDNA FLJ59286, highly similar to Pre-mRNA-processing factor 40 homolog A [OS=Homo sapiens]	2	PRPF40A	82116.9	206784	63547.9	35046.9	159275	20753.4
B4DPZ3	High	cDNA FLJ53290, highly similar to Cytoplasmic dynein 1 intermediate chain 2 [OS=Homo sapiens]	2	DYNC1I2	127583	52411.4	333274	54451.3	40369.8	108840
B4DPZ5	High	cDNA FLJ53495, highly similar to Polymerase I and transcript release factor [OS=Homo sapiens]	3	PTRF; CAVIN1	471504	417221	536360	201235	321364	175164
B4DQ37	High	cDNA FLJ56223, highly similar to Sorting nexin-17 [OS=Homo sapiens]	1	SNX17	37047.1	14457.6	62054	15811.4	11135.9	20265.6
B4DQ54	High	cDNA FLJ51037, moderately similar to Homo sapiens Rhesus blood group, C glycoprotein (RHCG), mRNA [OS=Homo sapiens]	3	RHCG	1.21595e+06	1.15459e+06	360500	518959	889326	117732
B4DR61	High	Protein transport protein Sec61 subunit alpha isoform 1 [OS=Homo sapiens]	6	SEC61A1	3.71019e+06	4.0344e+06	3.39587e+06	1.58348e+06	3107496	1.10902e+06
B4DR67	High	cDNA FLJ56758, highly similar to Dolichyl-phosphate beta-glucosyltransferase [OS=Homo sapiens]	4	ALG5	414675	446014	380223	176980	343542	124173
B4DR99	High	cDNA FLJ59140 [OS=Homo sapiens]	2	TAPT1	120798	163599	81873.1	51555.5	126012	26738.1
B4DRA0	High	cDNA FLJ58459, highly similar to RNA-binding region-containing protein 2 [OS=Homo sapiens]	1	RBM39	18428.9	44495.1	28596.8	7865.32	34272.4	9339.14
B4DRB0	High	tetraspanin [OS=Homo sapiens]	2	TSPAN6	333406	274175	279581	142295	211183	91305.3
B4DRL5	High	cDNA FLJ60834, highly similar to Engulfment and cell motility protein 2 (CED-12 homolog A) [OS=Homo sapiens]	1	ELMO2	22014.9	10851.3	37038.7	9395.79	8358.19	12096.1
B4DSC2	High	Elongation of very long chain fatty acids protein [OS=Homo sapiens]	2	ELOVL5	280178	304802	346896	119578	234774	113289
B4DSN3	High	cDNA FLJ60345, highly similar to Protein transport protein Sec24C [OS=Homo sapiens]	3	SEC24C	281755	115008	190403	120251	88585	62181.7
B4DSV8	High	cDNA FLJ54146, highly similar to Growth hormone-inducible transmembrane protein [OS=Homo sapiens]	7	GHITM	3.53805e+06	2.29425e+06	1.224e+06	1.51001e+06	1.76714e+06	399734
B4DSX2	High	cDNA FLJ60144, highly similar to Complement component C1q receptor [OS=Homo sapiens]	4	CD93	36308.6	403403	71700	15496.2	310721	23415.8
B4DT77	High	Annexin [OS=Homo sapiens]	10	ANXA7	1.74252e+06	2.58263e+06	2.34877e+06	743695	1.98927e+06	767060
B4DT94	High	cDNA FLJ53652, highly similar to Mitochondrial 28S ribosomal protein S27 [OS=Homo sapiens]	4	MRPS27	231798	133640	120205	98929.7	102936	39256.6
B4DTR4	High	cDNA FLJ55347, highly similar to EH-domain-containing protein 1 [OS=Homo sapiens]	4	EHD1	338146	111298	482586	144318	85726.9	157603
B4DTU7	High	10-formyltetrahydrofolate dehydrogenase [OS=Homo sapiens]	1	ALDH1L2	68860.1	12692.6	-	29389	9776.45	-
B4DTY9	High	Integrin beta [OS=Homo sapiens]	1	-	40468.7	59236.6	69614.3	17271.7	45626.9	22734.6
B4DUQ1	High	cDNA FLJ54552, highly similar to Heterogeneous nuclear ribonucleoprotein K [OS=Homo sapiens]	4	HNRNPK	475636	321942	744099	202998	247976	243008
B4DV79	High	Eukaryotic translation initiation factor 3 subunit B [OS=Homo sapiens]	1	EIF3B	54647	-	64416.9	23322.9	-	21037.3
B4DV94	High	cDNA FLJ58285, highly similar to Homo sapiens pre-B-cell leukemia transcription factor interacting protein 1 (PBXIP1), mRNA [OS=Homo sapiens]	7	PBXIP1	429575	533939	344136	183339	411266	112388
B4DVQ5	High	Eukaryotic translation initiation factor 3 subunit C [OS=Homo sapiens]	3	EIF3C	203402	129102	279389	86810.6	99441	91242.8
B4DVT0	High	cDNA FLJ53460, highly similar to Y+L amino acid transporter 1 [OS=Homo sapiens]	2	SLC7A7	159810	116246	67874.4	68205.7	89538.2	22166.4
B4DWA5	High	cDNA FLJ52464, highly similar to GTPase, IMAP family member 4 [OS=Homo sapiens]	1	GIMAP4	-	84078.3	34476.8	-	64761.3	11259.4
B4DWB0	High	cDNA FLJ59772, highly similar to Nucleotide-binding protein-like [OS=Homo sapiens]	2	NUBPL	61415.1	71243.2	39541.2	26211.5	54875	12913.3
B4DWC4	High	chloride intracellular channel protein [OS=Homo sapiens]	9	CLIC4	1.46472e+06	1.57914e+06	3.00554e+06	625133	1.21633e+06	981547
B4DWG1	High	cDNA FLJ55643, highly similar to SEC23-interacting protein [OS=Homo sapiens]	4	SEC23IP	67662.3	34115	157422	28877.8	26277	51411
B4DWH7	High	cDNA FLJ57632, highly similar to Vacuolar ATP synthase subunit B, kidney isoform [OS=Homo sapiens]	6	ATP6V1B1	1.54468e+06	352859	558627	659259	271790	182436
B4DXB6	High	cDNA FLJ58335, highly similar to GPI transamidase component PIG-U [OS=Homo sapiens]	2	PIGU	156468	208549	162113	66779.3	160634	52942.7
B4DXM7	High	cDNA FLJ52355, highly similar to Solute carrier family 2, facilitated glucose transporter member 5 [OS=Homo sapiens]	3	SLC2A5	608948	922970	349809	259895	710917	114241
B4DXR2	High	cDNA FLJ60945, highly similar to Eukaryotic translation initiation factor 4gamma 3 OS=Homo sapiens PE=2 SV=1	1	EIF4G3	129209	60204.4	38144.3	55145.5	46372.4	12457.2
B4DY08	High	Heterogeneous nuclear ribonucleoproteins C1/C2 [OS=Homo sapiens]	6	HNRNPC	699020	1.6915e+06	1.04697e+06	298336	1.30288e+06	341918
B4DY09	High	Interleukin enhancer-binding factor 2 [OS=Homo sapiens]	7	ILF2	630836	533930	824753	269236	411260	269348
B4DY23	High	cDNA FLJ61188, highly similar to Basigin [OS=Homo sapiens]	7	BSG	2.67895e+06	4.47984e+06	2.5471e+06	1.14336e+06	3.4506e+06	831831
B4DY46	High	cDNA FLJ53447, highly similar to Syntaxin-binding protein 2 [OS=Homo sapiens]	6	STXBP2	222079	661600	442373	94781.7	509597	144470
B4DY51	High	cDNA FLJ55546, highly similar to Protein GPR89A [OS=Homo sapiens]	3	GPR89B	292932	445250	284680	125021	342953	92970.7
B4DYW0	High	mannosyltransferase [OS=Homo sapiens]	1	-	44130.8	24764.5	37257.2	18834.7	19074.8	12167.4
B4DZ55	High	cDNA FLJ52097, weakly similar to Homo sapiens transmembrane and tetratricopeptide repeat containing 1 (TMTC1), mRNA [OS=Homo sapiens]	6	TMTC3	229063	381957	230846	97762.5	294202	75389.6
B4E0B2	High	cDNA FLJ51426, highly similar to Adapter-related protein complex 3 beta-1 subunit [OS=Homo sapiens]	3	AP3B1	114020	65662.3	186897	48663	50576.3	61036.6
B4E0C7	High	cDNA FLJ58558, highly similar to Tripeptidyl-peptidase 1 [OS=Homo sapiens]	7	TPP1	5.96076e+06	6.55148e+06	8.14438e+06	2.54401e+06	5.04628e+06	2.65979e+06
B4E0E1	High	poly [ADP-ribose] polymerase [OS=Homo sapiens]	3	PARP1	21690.2	120790	32751.8	9257.21	93038.8	10696.1
B4E0K9	High	Alpha-mannosidase [OS=Homo sapiens]	1	MAN2B1	36550.6	35027.8	57760.5	15599.5	26980.1	18863.4
B4E0M5	High	cDNA FLJ58823, highly similar to Thromboxane-A synthase [OS=Homo sapiens]	4	TBXAS1	514418	294917	476712	219550	227160	155684
B4E0S6	High	cDNA FLJ55635, highly similar to pre-mRNA-splicing factorATP-dependent RNA helicase DHX15 [OS=Homo sapiens]	7	DHX15	275789	384377	251505	117705	296066	82136.4
B4E0X1	High	Beta-2-microglobulin [OS=Homo sapiens]	3	B2M	2.95124e+07	2.23046e+07	2.90773e+07	1.25957e+07	1.71801e+07	9.49605e+06
B4E1M6	High	cDNA FLJ58565, highly similar to Solute carrier family 13 member 2 [OS=Homo sapiens]	3	SLC13A2	194475	318008	33350.3	83000.6	244945	10891.5
B4E240	High	cDNA FLJ58827, highly similar to UBX domain-containing protein 2 [OS=Homo sapiens]	4	UBXN4	21523.5	676304	49957.8	9186.08	520922	16315.2
B4E2A6	High	cDNA FLJ55508, highly similar to Sad1/unc-84-like protein 2 [OS=Homo sapiens]	3	SUN2	1.11666e+07	8.7711e+06	1.41621e+07	4.76581e+06	6.75594e+06	4.62504e+06
B4E2J2	High	cDNA FLJ51755, highly similar to Glutathione S-transferase Mu 3 [OS=Homo sapiens]	1	GSTM3	87298.6	20760.4	107201	37258.4	15990.7	35009.7
B4E2N3	High	cDNA FLJ52151, highly similar to 2-oxoisovalerate dehydrogenase subunit beta, mitochondrial [OS=Homo sapiens]	1	BCKDHB	1.25238e+06	1.23137e+06	892037	534508	948463	291321
B4E324	High	cDNA FLJ60397, highly similar to Lysosomal protective protein [OS=Homo sapiens]	6	CTSA	1.07929e+06	366662	778172	460635	282421	254135
B4E3B2	High	cDNA FLJ51200 [OS=Homo sapiens]	2	SLC47A1	17929.1	122106	-	7651.99	94052.1	-
B4E3M8	High	cDNA FLJ52077, weakly similar to X-linked retinitis pigmentosa GTPase regulator-interacting protein 1 [OS=Homo sapiens]	1	RPGRIP1L	34753	30072.8	-	14832.3	23163.5	-
B4E3S0	High	Coronin [OS=Homo sapiens]	2	CORO1C	52072.1	40185	100777	22224	30952.5	32911.6
B5B2S4	Medium	Nuclear factor of activated T-cells c3 isoform IAL-deltaXa [OS=Homo sapiens]	1	NFATC3	50963.8	143647	56921.9	21751	110644	18589.5
B5BU25	High	U2 small nuclear RNA auxiliary factor 2 isoform b [OS=Homo sapiens]	3	U2AF2	11126.7	162803	28208.1	4748.78	125399	9212.18
B5BUB1	High	RuvB-like helicase [OS=Homo sapiens]	9	RUVBL1	783079	669936	951360	334212	516018	310695
B5BUB5	High	autoantigen La [OS=Homo sapiens]	2	SSB	90382.2	29099.3	170888	38574.5	22413.7	55808.5
B5MCD7	High	Synaptogyrin-1 [OS=Homo sapiens]	1	SYNGR1	145490	142834	119463	62094	110017	39014.3
B5MCF8	High	Protein Mpv17 [OS=Homo sapiens]	2	MPV17	215283	130949	163850	91881.2	100863	53510.1
B5MCH7	Medium	Basic leucine zipper and W2 domain-containing protein 2 [OS=Homo sapiens]	1	BZW2	38284.7	16150.4	48055.5	16339.6	12439.8	15693.9
B5MDF5	High	GTP-binding nuclear protein RAN [OS=Homo sapiens]	5	RAN	1.46694e+06	841183	1.48349e+06	626077	647920	484478
B5MDU6	High	Lipid droplet-associated hydrolase [OS=Homo sapiens]	4	LDAH	271828	201482	160440	116014	155192	52396.3
B7Z1T1	High	Tail-anchored protein insertion receptor WRB [OS=Homo sapiens]	1	WRB	36324.6	48683.2	42704.5	15503.1	37498.2	13946.4
B7Z1X8	High	Methionine adenosyltransferase 2 subunit beta [OS=Homo sapiens]	1	MAT2B	92152.7	27042.6	135411	39330.1	20829.6	44222.5
B7Z2F5	Medium	cDNA FLJ55918, highly similar to Echinoderm microtubule-associated protein-like 2 [OS=Homo sapiens]	1	EML2	67335.1	76851.5	47360.2	28738.1	59194.8	15466.9
B7Z321	High	cDNA FLJ53330, highly similar to Exocyst complex component 4 [OS=Homo sapiens]	2	EXOC4	24267.8	45063.9	73283.7	10357.3	34710.5	23933
B7Z322	High	cDNA FLJ52146, highly similar to Grancalcin [OS=Homo sapiens]	2	GCA	55052.2	61534.7	59189.1	23495.9	47397.1	19330
B7Z341	High	cDNA FLJ54521, highly similar to Protein NDRG3 [OS=Homo sapiens]	2	NDRG3	83815	57503.8	86215.5	35771.6	44292.3	28156.2
B7Z357	High	cDNA FLJ58993, highly similar to Ubiquinone biosynthesis monooxygenase COQ6 [OS=Homo sapiens]	2	COQ6	237054	77648.8	72275.9	101173	59808.9	23603.8
B7Z390	High	cDNA FLJ53336, highly similar to ADAM 15 (Adisintegrin and metalloproteinase domain 15) [OS=Homo sapiens]	3	ADAM15	50357.5	45040.8	38099.2	21492.2	34692.6	12442.4
B7Z3K1	High	cDNA FLJ51973 [OS=Homo sapiens]	2	TMEM128	19732.3	19143.1	24882.3	8421.61	14745	8126.06
B7Z3K3	High	cDNA FLJ57998, highly similar to Homo sapiens myo-inositol 1-phosphate synthase A1 (ISYNA1), mRNA [OS=Homo sapiens]	2	ISYNA1	253874	98850.2	424992	108351	76139.3	138794
B7Z3R2	High	Two pore calcium channel protein 1 [OS=Homo sapiens]	4	TPCN1	278395	307097	206898	118817	236541	67568.5
B7Z4B2	High	aminopeptidase [OS=Homo sapiens]	9	NPEPPS	1.53358e+06	1.01709e+06	2.02261e+06	654519	783410	660543
B7Z4V2	High	cDNA FLJ51907, highly similar to Stress-70 protein, mitochondrial [OS=Homo sapiens]	35	HSPA9	2.9278e+07	3.75278e+07	2.59158e+07	1.24956e+07	2.89058e+07	8.46358e+06
B7Z4V9	High	cDNA FLJ57541, highly similar to Skeletal muscle and kidney-enriched inositol phosphatase [OS=Homo sapiens]	2	INPP5K	172553	106500	147522	73644.3	82031.8	48177.8
B7Z532	High	cDNA FLJ51028, highly similar to 60 kDa heat shock protein, mitochondrial [OS=Homo sapiens]	1	HSPD1	186021	217105	83949.2	79392.4	167225	27416.1
B7Z591	High	Calcium load-activated calcium channel [OS=Homo sapiens]	2	TMCO1	451439	401645	351550	192671	309367	114809
B7Z5E4	High	cDNA FLJ54614, highly similar to Vacuolar protein sorting-associated protein 45 [OS=Homo sapiens]	2	VPS45	-	70714.3	20170.5	-	54467.7	6587.27
B7Z5J6	High	cDNA FLJ56134, highly similar to Rap guanine nucleotide exchange factor 3 [OS=Homo sapiens]	1	RAPGEF3	-	67214.2	25720.1	-	51771.7	8399.66
B7Z5V6	High	cDNA FLJ57046, highly similar to Lysosomal alpha-glucosidase [OS=Homo sapiens]	1	GAA	76528.6	44414.9	56489.4	32661.8	34210.5	18448.3
B7Z611	High	cDNA FLJ50848, highly similar to Homo sapiens suppressor of var1, 3-like 1 (S. cerevisiae) (SUPV3L1), mRNA [OS=Homo sapiens]	1	SUPV3L1	71494.8	48093.1	45826.5	30513.5	37043.7	14966
B7Z6A9	High	Dystrobrevin [OS=Homo sapiens]	4	DTNB	-	293659	73243	-	226190	23919.7
B7Z6Y2	High	cDNA FLJ54942, highly similar to Homo sapiens bridging integrator 1 (BIN1), transcript variant 10, mRNA [OS=Homo sapiens]	1	BIN1	54693.2	22622.3	67225.4	23342.7	17424.8	21954.4
B7Z6Z4	High	Myosin light polypeptide 6 [OS=Homo sapiens]	9	MYL6	6.51281e+06	2.16829e+06	4.94171e+06	2.77962e+06	1.67012e+06	1.61386e+06
B7Z795	High	Carboxylic ester hydrolase [OS=Homo sapiens]	3	CES1	195865	32845.9	24811.9	83593.8	25299.5	8103.06
B7Z7E4	High	cDNA FLJ53675, highly similar to Homo sapiens LETM1 domain containing 1 (LETMD1), transcript variant 1, mRNA [OS=Homo sapiens]	1	LETMD1	153717	80387.9	51723.9	65605.2	61918.7	16892
B7Z7F5	High	cDNA FLJ51581 [OS=Homo sapiens]	6	KIAA1715; LNPK	229806	598226	171043	98079.3	460783	55859
B7Z7Q6	High	cDNA FLJ57232, highly similar to Lysosomal Pro-X carboxypeptidase [OS=Homo sapiens]	4	PRCP	298480	681824	355067	127389	525174	115958
B7Z7X3	High	cDNA FLJ51770, highly similar to Microsomal triglyceride transfer protein large subunit [OS=Homo sapiens]	2	MTTP	106749	105649	46422.2	45559.6	81375.9	15160.6
B7Z7Y2	High	cDNA FLJ52807 [OS=Homo sapiens]	2	MFSD6	63229.9	182245	68147.2	26986	140374	22255.5
B7Z889	High	cDNA FLJ61648, highly similar to Homo sapiens NOD9 protein (NOD9), transcript variant 2, mRNA [OS=Homo sapiens]	5	NLRX1	729435	391614	337967	311318	301640	110373
B7Z8I4	Medium	cDNA FLJ56747, moderately similar to Cohesin subunit SA-3 [OS=Homo sapiens]	1	STAG3L2	148696	111104	131868	63462.3	85577.9	43065.3
B7Z8J8	High	Solute carrier organic anion transporter family member [OS=Homo sapiens]	1	SLCO2A1	1.93173e+06	1.19743e+06	874188	824448	922320	285492
B7Z8Y6	High	cDNA FLJ58394, highly similar to Platelet endothelial cell adhesion molecule [OS=Homo sapiens]	2	PECAM1	2.33083e+07	2.281e+07	2.34679e+07	9.94782e+06	1.75694e+07	7.66414e+06
B7Z920	High	cDNA FLJ61714, highly similar to Tripeptidyl-peptidase 2 [OS=Homo sapiens]	1	TPP2	36923.8	-	49102	15758.8	-	16035.7
B7Z992	High	cDNA FLJ53698, highly similar to Gelsolin [OS=Homo sapiens]	21	GSN	9.4645e+06	1.40048e+07	1.20938e+07	4.03938e+06	1.07872e+07	3.94957e+06
B7Z9F3	High	cDNA, FLJ78817, highly similar to Metaxin-2 [OS=Homo sapiens]	9	MTX2	3.88708e+06	2.18172e+06	1.37843e+06	1.65898e+06	1.68047e+06	450168
B7Z9L3	Medium	chloride channel protein [OS=Homo sapiens]	1	CLCN7	69188.4	56238.8	53514.2	29529.1	43317.9	17476.7
B7Z9M1	High	amino acid transporter [OS=Homo sapiens]	2	SLC1A4	64943.2	107476	71714.8	27717.3	82783.5	23420.6
B7Z9M9	High	cDNA, FLJ78893, highly similar to Destrin [OS=Homo sapiens]	4	DSTN	702507	205651	1.29727e+06	299825	158403	423663
B7Z9U2	High	cDNA, FLJ78956, highly similar to Vesicle-fusing ATPase [OS=Homo sapiens]	6	NSF	120978	513038	412811	51632.4	395167	134816
B7Z9U5	High	cDNA, FLJ78959, highly similar to Transmembrane protein 94 [OS=Homo sapiens]	1	KIAA0195; TMEM94	70154.2	97088.5	92371.4	29941.3	74782.4	30166.6
B7ZA94	High	cDNA, FLJ79108, highly similar to Complement component C8 beta chain [OS=Homo sapiens]	1	C8B	88891.7	66445	56191.5	37938.3	51179.2	18351
B7ZAF6	High	Succinate--CoA ligase [ADP-forming] subunit beta, mitochondrial [OS=Homo sapiens]	1	SUCLA2	149499	215217	286060	63805.2	165771	93421.5
B7ZAJ2	High	cDNA, FLJ79206, weakly similar to Calcofluor white hypersensitive protein [OS=Homo sapiens]	1	CWH43	45754.3	-	19545.6	19527.6	-	6383.19
B7ZB41	High	cDNA, FLJ79405, highly similar to Homo sapiens solute carrier family 25, member 24, transcript variant 1, mRNA [OS=Homo sapiens]	20	SLC25A24	1.06399e+07	9.86377e+06	1.05051e+07	4.54102e+06	7.59756e+06	3.43077e+06
B7ZB80	High	cDNA, FLJ79444, highly similar to 2-oxoisovalerate dehydrogenase subunit beta, mitochondrial [OS=Homo sapiens]	1	BCKDHB	35551	27263.4	40106.2	15172.9	20999.6	13097.9
B7ZKQ8	High	Podocalyxin [OS=Homo sapiens]	14	PODXL	5.98641e+07	1.02852e+08	8.74959e+07	2.55496e+07	7.92215e+07	2.85744e+07
B7ZLD8	High	Integrin beta [OS=Homo sapiens]	6	ITGB4	89290.2	121478	110241	38108.4	93568.7	36002.5
B7ZLM6	High	X-prolyl aminopeptidase (Aminopeptidase P) 2, membrane-bound [OS=Homo sapiens]	8	XPNPEP2	1.02563e+06	873183	139092	437732	672569	45424.7
B7ZLP2	High	HSPA12B protein [OS=Homo sapiens]	11	HSPA12B	337482	3.99631e+06	1.1519e+06	144035	3.07816e+06	376186
B7ZLW0	High	LPP protein [OS=Homo sapiens]	1	LPP	35980.7	39368.7	47828.5	15356.3	30323.8	15619.8
B7ZM24	High	SLC12A2 protein [OS=Homo sapiens]	2	SLC12A2	22196.4	111855	40805.1	9473.26	86156.6	13326.1
B7ZM73	High	MON2 protein [OS=Homo sapiens]	3	MON2	128232	10304.5	99304.8	54728.6	7937.04	32430.9
B7ZVZ1	High	Sept8 protein [OS=Homo sapiens]	2	SEPT8	108662	37607	273041	46376.3	28966.7	89169.5
B8ZWD1	High	acyl-CoA-binding protein [OS=Homo sapiens]	3	DBI	366468	149868	593541	156406	115436	193838
B8ZZA2	High	Hyccin [OS=Homo sapiens]	1	FAM126A	13860.3	35816	-	5915.48	27587.2	-
B9A6K8	High	TBC1 domain family, member 9B [OS=Homo sapiens]	1	TBC1D9B	55090.6	-	32921.5	23512.2	-	10751.5
B9EG90	High	topoisomerase (DNA) I [OS=Homo sapiens]	2	TOP1	143301	-	200106	61160	-	65350.7
B9EH95	High	Armadillo repeat gene deletes in velocardiofacial syndrome [OS=Homo sapiens]	3	ARVCF	74537.5	154431	131257	31812.1	118950	42865.7
C0JYY2	High	apolipoprotein B (including Ag(x) antigen) [OS=Homo sapiens]	21	APOB	990054	1.13374e+06	753620	422548	873262	246117
C4TNX2	High	REV3-like, catalytic subunit of DNA polymerase zeta (yeast) [OS=Homo sapiens]	1	REV3L	91810.8	11698.8	125820	39184.2	9011.02	41090.2
C7FDR3	High	MHC class I antigen [OS=Homo sapiens]	2	HLA-B	824445	1.04868e+06	2.07824e+06	351867	807744	678711
C8CJH0	Medium	Regulator of calcineurin 3 isoform 1a,2,3,4 (Fragment) OS=Homo sapiens GN=RCAN3 PE=2 SV=1	1	RCAN3	196571	224188	134869	83894.9	172681	44045.5
C8YBL1	High	Cytochrome c oxidase subunit 2 [OS=Homo sapiens]	1	COX2	1.7723e+07	7.71016e+06	5.29459e+06	7.56403e+06	5.93874e+06	1.7291e+06
C9IYS5	High	Phytanoyl-CoA dioxygenase, peroxisomal [OS=Homo sapiens]	1	PHYH	181542	55801.7	51820	77480.8	42981.2	16923.4
C9J0I5	High	Solute carrier family 12 member 9 [OS=Homo sapiens]	1	SLC12A9	50489.3	36407.6	44711.2	21548.4	28042.9	14601.8
C9J1V9	Medium	EEF1E1-BLOC1S5 readthrough (NMD candidate) [OS=Homo sapiens]	1	EEF1E1-BLOC1S5	58939.6	21518.1	42423.8	25155	16574.3	13854.7
C9J338	High	Traf2 and NCK-interacting protein kinase [OS=Homo sapiens]	1	TNIK	133217	47455.4	-	56855.9	36552.5	-
C9J3M6	Medium	Sodium/hydrogen exchanger 10 [OS=Homo sapiens]	1	SLC9C1	17630.1	13313.5	-	7524.39	10254.7	-
C9J4I2	High	Galactosylceramide sulfotransferase [OS=Homo sapiens]	1	GAL3ST1	16994.1	28364.7	-	7252.94	21847.9	-
C9J5X1	High	Tyrosine-protein kinase receptor [OS=Homo sapiens]	1	IGF1R	105075	83965.3	104452	44845.3	64674.2	34112
C9J6Q4	High	transmembrane 4 L6 family member 18 [OS=Homo sapiens]	1	TM4SF18	65864.8	128425	74779.7	28110.6	98919.3	24421.5
C9J7I2	High	UPF0505 protein C16orf62 [OS=Homo sapiens]	2	VPS35L	88605.1	35080	88519.9	37816	27020.3	28908.8
C9J7S5	High	Dol-P-Man:Man(5)GlcNAc(2)-PP-Dol alpha-1,3-mannosyltransferase [OS=Homo sapiens]	1	ALG3	94217.8	110413	96708.6	40211.5	85045.8	31583.1
C9JA28	High	Translocon-associated protein subunit gamma [OS=Homo sapiens]	1	SSR3	553780	1.02353e+06	596806	236349	788371	194905
C9JD53	High	Isopentenyl-diphosphate Delta-isomerase 1 [OS=Homo sapiens]	1	IDI1	42517.1	33131.4	45458.5	18146	25519.4	14845.8
C9JE50	High	UDP-glucuronic acid decarboxylase 1 [OS=Homo sapiens]	1	UXS1	46398.7	-	21137.2	19802.6	-	6902.99
C9JEU5	High	Fibrinogen gamma chain [OS=Homo sapiens]	13	FGG	284434	666046	1.44666e+06	121394	513022	472450
C9JF17	High	apolipoprotein D [OS=Homo sapiens]	7	APOD	8.28098e+06	3.07165e+06	1.54697e+06	3.53426e+06	2.36594e+06	505210
C9JFR7	High	cytochrome c [OS=Homo sapiens]	7	CYCS	5.23422e+06	3.64978e+06	4.64584e+06	2.23393e+06	2.81124e+06	1.51724e+06
C9JG87	High	39S ribosomal protein L39, mitochondrial [OS=Homo sapiens]	2	MRPL39	138682	38049	27385.5	59188.4	29307.2	8943.56
C9JGJ9	High	B-cell receptor-associated protein 29 [OS=Homo sapiens]	2	BCAP29	224838	583436	251646	95959.2	449391	82182.6
C9JIG9	High	Serine/threonine-protein kinase OSR1 [OS=Homo sapiens]	2	OXSR1	252029	51761.2	242793	107564	39869	79291.2
C9JIZ6	High	Prosaposin [OS=Homo sapiens]	7	PSAP	4.73727e+06	3.83965e+06	4.83607e+06	2.02183e+06	2.95749e+06	1.57936e+06
C9JLU1	High	DNA-directed RNA polymerases I, II, and III subunit RPABC3 [OS=Homo sapiens]	1	POLR2H	42989.1	23216	52525.4	18347.4	17882.1	17153.7
C9JP23	High	C-C chemokine receptor-like 2 [OS=Homo sapiens]	1	CCRL2	76747.2	111892	70738.3	32755.1	86185.1	23101.7
C9JQ41	High	coiled-coil domain-containing protein 58 [OS=Homo sapiens]	1	CCDC58	82144.3	70007.8	105495	35058.6	53923.5	34452.6
C9JQQ2	High	3-oxoacyl-[acyl-carrier-protein] synthase, mitochondrial [OS=Homo sapiens]	1	OXSM	58924.2	45309.1	-	25148.4	34899.3	-
C9JRD2	Medium	DnaJ homolog subfamily B member 2 [OS=Homo sapiens]	1	DNAJB2	20555.6	84925.9	28530.2	8772.99	65414.1	9317.39
C9JWV9	High	Protein lifeguard 3 [OS=Homo sapiens]	1	TMBIM1	261349	398180	366207	111542	306698	119596
C9JY28	High	LYR motif-containing protein 4 [OS=Homo sapiens]	1	LYRM4	84805.6	63082.9	67414.2	36194.4	48589.5	22016.1
C9JYN0	High	Synaptophysin-like protein 1 [OS=Homo sapiens]	2	SYPL1	5.39337e+06	7.12672e+06	6.27516e+06	2.30185e+06	5.48935e+06	2.04934e+06
C9JZR2	High	Catenin delta-1 [OS=Homo sapiens]	26	CTNND1	1.26737e+06	1.01967e+07	3.03788e+06	540905	7.85399e+06	992111
D3DNG8	High	angiotensin II receptor, type 1, isoform CRA_a [OS=Homo sapiens]	3	AGTR1	385831	322841	369950	164670	248668	120818
D3DP46	High	signal peptidase complex subunit 3 homolog (S. cerevisiae), isoform CRA_a [OS=Homo sapiens]	4	SPCS3	3.10295e+06	3.28555e+06	2.84808e+06	1.32432e+06	2.53069e+06	930125
D3DP78	High	aspartyl-tRNA synthetase, isoform CRA_b [OS=Homo sapiens]	4	DARS	136945	378143	443825	58447.2	291264	144944
D3DQY6	High	tumor susceptibility gene 101, isoform CRA_a [OS=Homo sapiens]	1	TSG101	19226.6	37852.5	52787.9	8205.77	29155.9	17239.5
D3DR65	High	SPFH domain family, member 1, isoform CRA_a [OS=Homo sapiens]	4	ERLIN1	209799	312657	160213	89540.8	240824	52322.3
D3DSM0	High	Integrin beta [OS=Homo sapiens]	11	ITGB2	316205	299221	133833	134954	230474	43707.3
D3DSM4	High	collagen, type XVIII, alpha 1, isoform CRA_d [OS=Homo sapiens]	17	COL18A1	2.32192e+07	1.64374e+07	2.33835e+07	9.90977e+06	1.26609e+07	7.63659e+06
D3DSP9	High	fibrinogen-like 1, isoform CRA_d [OS=Homo sapiens]	1	FGL1	21244.6	-	50632.4	9067.05	-	16535.5
D3DSQ1	High	N-acylsphingosine amidohydrolase (acid ceramidase) 1, isoform CRA_c [OS=Homo sapiens]	3	ASAH1	1.14609e+07	8.03363e+06	1.05646e+07	4.89142e+06	6.1879e+06	3.4502e+06
D3DT71	Medium	Collagen, type XI, alpha 1, isoform CRA_b [OS=Homo sapiens]	1	COL11A1	54073.7	49107.3	56972.5	23078.3	37824.9	18606.1
D3DTX7	High	collagen, type I, alpha 1, isoform CRA_a [OS=Homo sapiens]	1	COL1A1	43528.2	16245	-	18577.5	12512.7	-
D3DVC4	High	nestin, isoform CRA_c [OS=Homo sapiens]	35	NES	3.899e+06	1.47368e+07	9.6659e+06	1.66407e+06	1.1351e+07	3.15669e+06
D3DWB6	High	ubiquitin specific peptidase 9, X-linked, isoform CRA_b [OS=Homo sapiens]	4	USP9X	250039	41690.3	277668	106715	32111.9	90680.7
D3DWV9	High	Isocitrate dehydrogenase [NAD] subunit, mitochondrial [OS=Homo sapiens]	7	IDH3G	848023	1.14677e+06	995074	361930	883298	324971
D6C6F3	High	MHC class I antigen [OS=Homo sapiens]	1	HLA-C	39911.8	25380.1	86471.2	17034	19549	28239.7
D6Q1S4	High	Myc target 1 transcript variant 1 [OS=Homo sapiens]	2	MYCT1	135021	281068	338469	57626.1	216492	110537
D6R9C5	High	Osteopontin [OS=Homo sapiens]	1	SPP1	21810.3	33080.9	-	9308.49	25480.6	-
D6R9S7	High	Solute carrier family 41 member 3 [OS=Homo sapiens]	3	SLC41A3	209667	221745	190025	89484.2	170799	62058.4
D6R9W4	Medium	drebrin [OS=Homo sapiens]	1	DBN1	-	61475.1	22356.5	-	47351.2	7301.19
D6RAE3	High	Nesprin-4 [OS=Homo sapiens]	1	SYNE4	73883.3	124390	82440.8	31532.8	95811.1	26923.5
D6RB59	High	exocyst complex component 3 [OS=Homo sapiens]	1	EXOC3	19017.2	20016.5	61170.6	8116.4	15417.7	19977.1
D6RB85	High	Calnexin [OS=Homo sapiens]	1	CANX	146868	229526	223557	62682.1	176793	73009.3
D6RBB6	High	Prostate androgen-regulated mucin-like protein 1 [OS=Homo sapiens]	1	PARM1	17659.1	81779.4	-	7536.78	62990.5	-
D6RBZ0	High	Heterogeneous nuclear ribonucleoprotein A/B [OS=Homo sapiens]	2	HNRNPAB	49305.6	30934.2	107889	21043.3	23827.1	35234.2
D6RE10	High	Elongation of very long chain fatty acids protein 7 [OS=Homo sapiens]	1	ELOVL7	65042.3	36683.9	34477.6	27759.6	28255.8	11259.7
D6RE58	High	Solute carrier family 35 member B1 [OS=Homo sapiens]	1	SLC35B1	81219.7	97103.1	66791.1	34663.9	74793.6	21812.6
D6REB4	High	Polyadenylate-binding protein-interacting protein 1 [OS=Homo sapiens]	1	PAIP1	33941	-	52884	14485.8	-	17270.8
D6REE5	High	Receptor of-activated protein C kinase 1 [OS=Homo sapiens]	4	RACK1	443445	154855	477222	189259	119277	155851
D6REM4	High	Casein kinase I isoform alpha [OS=Homo sapiens]	1	CSNK1A1	62967.1	40909.8	72772.6	26873.9	31510.8	23766
D6RER5	High	Septin-11 [OS=Homo sapiens]	4	SEPTIN11	982140	611870	2.25638e+06	419170	471293	736889
D6REX3	High	Protein transport protein Sec31A [OS=Homo sapiens]	3	SEC31A	178456	30140.9	187397	76163.7	23216	61200
D6RF35	High	vitamin D-binding protein [OS=Homo sapiens]	4	GC	67434.9	121403	18268.2	28780.7	93510.6	5966.03
D6RFN0	High	COP9 signalosome complex subunit 4 [OS=Homo sapiens]	1	COPS4	36978	28560.2	95703.1	15781.9	21998.4	31254.7
D6RG15	High	Twinfilin-2 [OS=Homo sapiens]	2	TWF2	89291.5	58098.3	184049	38108.9	44750.2	60106.6
D6RGE2	High	Isochorismatase domain-containing protein 1 [OS=Homo sapiens]	2	ISOC1	231251	143614	252140	98696.3	110619	82343.7
D6RH08	High	UDP-glucuronosyltransferase [OS=Homo sapiens]	1	UGT2B7	27586.6	80480.1	-	11773.8	61989.8	-
D6RH31	High	Nephronectin [OS=Homo sapiens]	1	NPNT	424411	620373	1.10894e+06	181135	477842	362158
D6RHI9	High	Ribonuclease T2 [OS=Homo sapiens]	1	RNASET2	83424.6	51886.9	98226.1	35605	39965.8	32078.6
D6RJ90	High	COMM domain containing 10, isoform CRA_b [OS=Homo sapiens]	1	COMMD10	73852.1	36495	124366	31519.5	28110.2	40615.4
D6RJI4	High	protein furry homolog-like [OS=Homo sapiens]	1	-	-	10822.1	54986.4	-	8335.73	17957.5
D9HTE9	High	plasma membrane citrate carrier [OS=Homo sapiens]	11	SLC25A1	1.95812e+07	1.85757e+07	1.17295e+07	8.35711e+06	1.43079e+07	3.83063e+06
D9IWP9	High	beta-2-glycoprotein I [OS=Homo sapiens]	11	APOH	1.18144e+06	2.22899e+06	473872	504228	1.71688e+06	154757
E2J0J0	High	NADH-ubiquinone oxidoreductase chain 4 [OS=Homo sapiens]	6	ND4	2.40323e+06	3.11005e+06	893424	1.02568e+06	2.39551e+06	291774
E2RVJ0	High	Anion exchange protein [OS=Homo sapiens]	13	SLC4A1	1.07394e+06	1.14753e+06	254545	458348	883881	83129.1
E5E079	High	Cytochrome c oxidase subunit 2 [OS=Homo sapiens]	1	COX2	60800.3	29013.3	-	25949.1	22347.5	-
E5E139	High	NADH-ubiquinone oxidoreductase chain 2 [OS=Homo sapiens]	1	ND2	2.94955e+06	1.64546e+06	856494	1.25885e+06	1.26742e+06	279713
E5KLM1	High	mitochondrial dynamin-like 120 kDa protein [OS=Homo sapiens]	35	OPA1	6.23781e+06	6.29596e+06	3.95726e+06	2.66225e+06	4.84946e+06	1.29236e+06
E5KND7	High	Elongation factor G, mitochondrial [OS=Homo sapiens]	7	GFM1	506077	216584	428105	215990	166824	139810
E5KSE7	High	mitochondrial short-chain specific acyl-CoA dehydrogenase [OS=Homo sapiens]	1	ACADS	3.2331e+06	2.09704e+06	2.35951e+06	1.37986e+06	1.61525e+06	770567
E5RGA1	High	Tissue-type plasminogen activator [OS=Homo sapiens]	1	PLAT	-	14191.6	59730.7	-	10931.1	19506.8
E5RGR0	High	Acyl-protein thioesterase 1 [OS=Homo sapiens]	5	LYPLA1	480459	286556	453130	205056	220720	147983
E5RH51	High	small integral membrane protein 12 [OS=Homo sapiens]	2	SMIM12	56987.1	59231.1	57127.9	24321.7	45622.7	18656.8
E5RH77	High	40S ribosomal protein S14 [OS=Homo sapiens]	1	RPS14	82964.4	54621.9	61226.9	35408.6	42072.5	19995.5
E5RHP7	High	carbonic anhydrase 1 [OS=Homo sapiens]	4	CA1	71522.4	442826	-	30525.2	341086	-
E5RI99	High	60S ribosomal protein L30 [OS=Homo sapiens]	3	RPL30	432589	465872	711400	184626	358837	232329
E5RIL0	High	Leptin receptor overlapping transcript-like 1 [OS=Homo sapiens]	1	LEPROTL1	48901.1	41633.1	37729.6	20870.6	32067.9	12321.7
E5RJI7	High	39S ribosomal protein L13, mitochondrial [OS=Homo sapiens]	1	MRPL13	96130.3	84769.9	50411.7	41027.7	65294	16463.4
E5RJR5	High	s-phase kinase-associated protein 1 [OS=Homo sapiens]	3	SKP1	232041	149600	245722	99033.5	115229	80247.8
E7E3W8	High	cytochrome b [OS=Homo sapiens]	1	CYTB	1.8321e+06	1.50419e+06	825614	781926	1.1586e+06	269629
E7EM50	High	GPI ethanolamine phosphate transferase 2 [OS=Homo sapiens]	1	PIGG	24863.4	33118	-	10611.5	25509.1	-
E7EM64	High	COP9 signalosome complex subunit 6 [OS=Homo sapiens]	2	COPS6	85129.4	32773	115200	36332.6	25243.4	37621.9
E7EN73	High	Dyslexia-associated protein KIAA0319-like protein [OS=Homo sapiens]	1	KIAA0319L	29734.4	38772.5	25576.2	12690.4	29864.5	8352.65
E7EN89	High	toll interacting protein, isoform CRA_b [OS=Homo sapiens]	1	TOLLIP	115780	109390	119062	49413.9	84257.9	38883.1
E7ENY0	High	Alpha-adducin [OS=Homo sapiens]	4	ADD1	25331.6	252401	93971.5	10811.3	194412	30689.2
E7EQG2	High	eukaryotic initiation factor 4A-II [OS=Homo sapiens]	1	EIF4A2	30734.4	31656.1	106487	13117.2	24383.1	34776.4
E7EQV9	High	ribosomal protein L15 [OS=Homo sapiens]	2	RPL15	317685	147748	328370	135586	113803	107239
E7ER45	High	Maltase-glucoamylase, intestinal [OS=Homo sapiens]	14	MGAM	4.75471e+06	7.62268e+06	1.94102e+06	2.02927e+06	5.87137e+06	633897
E7ESC6	High	exportin-7 [OS=Homo sapiens]	8	XPO7	740531	28778.6	242442	316053	22166.7	79176.6
E7ESK6	High	Syndecan [OS=Homo sapiens]	1	SDC2	240873	147216	243140	102803	113393	79404.5
E7ESP4	High	Integrin alpha-2 [OS=Homo sapiens]	1	ITGA2	451444	762361	500159	192673	587208	163342
E7ETK0	High	40S ribosomal protein S24 [OS=Homo sapiens]	2	RPS24	142026	87032.9	38324.9	60615.7	67037.1	12516.1
E7ETU9	High	procollagen-lysine,2-oxoglutarate 5-dioxygenase 2 [OS=Homo sapiens]	3	PLOD2	156373	51319	104019	66738.7	39528.4	33970.4
E7EU96	High	Casein kinase II subunit alpha [OS=Homo sapiens]	1	CSNK2A1	55610.9	47625.9	49641.4	23734.3	36683.8	16211.9
E7EUC7	High	UTP--glucose-1-phosphate uridylyltransferase [OS=Homo sapiens]	6	UGP2	838454	233597	924335	357846	179928	301869
E7EWX8	High	monoglyceride lipase [OS=Homo sapiens]	1	MGLL	113832	37575.5	66390.2	48582.5	28942.5	21681.7
E7EX73	High	eukaryotic translation initiation factor 4 gamma 1 [OS=Homo sapiens]	3	EIF4G1	72660.4	25916.8	115079	31010.9	19962.4	37582.4
E7EXA3	High	NIF3-like protein 1 [OS=Homo sapiens]	2	NIF3L1	70808.1	41879.1	192617	30220.4	32257.3	62904.8
E9LUE8	High	Sphingomyelin phosphodiesterase 1 isoform 6 [OS=Homo sapiens]	1	SMPD1	22467.7	14838.1	-	9589.06	11429.1	-
E9PBS1	High	multifunctional protein ADE2 [OS=Homo sapiens]	5	PAICS	343428	92137.1	124750	146573	70968.6	40740.7
E9PC15	High	Acylglycerol kinase, mitochondrial [OS=Homo sapiens]	13	AGK	4.40637e+06	4.41549e+06	3.01286e+06	1.88061e+06	3.40103e+06	983938
E9PC41	High	Interleukin-1 receptor-like 1 [OS=Homo sapiens]	4	IL1RL1	85760.8	367805	425598	36602.1	283302	138992
E9PCW1	High	Golgi SNAP receptor complex member 1 [OS=Homo sapiens]	3	GOSR1	68370.9	112447	34440.1	29180.2	86612.5	11247.4
E9PD35	High	Vascular endothelial growth factor receptor 3 [OS=Homo sapiens]	1	FLT4	13460.5	17919.4	27457.3	5744.82	13802.4	8967
E9PD92	High	Glucose-6-phosphate 1-dehydrogenase [OS=Homo sapiens]	1	G6PD	53961.6	23612.8	66536.5	23030.4	18187.7	21729.5
E9PDF6	High	Unconventional myosin-Ib [OS=Homo sapiens]	11	MYO1B	596344	906938	725493	254515	698568	236931
E9PDN5	High	Dystrophin [OS=Homo sapiens]	5	DMD	-	479686	48265.1	-	369478	15762.4
E9PE17	High	28S ribosomal protein S17, mitochondrial [OS=Homo sapiens]	1	MRPS17	45375.9	43509.9	-	19366.1	33513.5	-
E9PF06	High	39S ribosomal protein L3, mitochondrial [OS=Homo sapiens]	2	MRPL3	68479.2	36147.1	33866.6	29226.4	27842.2	11060.2
E9PF16	High	Acyl-CoA synthetase family member 2, mitochondrial [OS=Homo sapiens]	17	ACSF2	4.78152e+06	444052	5.15389e+06	2.04072e+06	342031	1.68316e+06
E9PFP8	High	Poly(rC)-binding protein 3 [OS=Homo sapiens]	1	PCBP3	56490.4	80192.9	121513	24109.7	61768.5	39683.8
E9PGQ0	High	Solute carrier family 25 member 44 [OS=Homo sapiens]	1	SLC25A44	43576	44523.5	-	18597.9	34294.2	-
E9PHN7	High	Glutathione S-transferase Mu 2 [OS=Homo sapiens]	1	GSTM2	171710	34619.8	137848	73284.3	26665.8	45018.2
E9PHY0	High	Lysosomal acid phosphatase [OS=Homo sapiens]	2	ACP2	230651	230138	165964	98440.2	177263	54200.5
E9PHY5	High	band 4.1-like protein 2 [OS=Homo sapiens]	6	EPB41L2	77633.8	370716	146115	33133.5	285544	47718.1
E9PI78	High	39S ribosomal protein L49, mitochondrial [OS=Homo sapiens]	1	MRPL49	65254.1	48732.1	47587.8	27849.9	37535.9	15541.2
E9PI87	High	Oxidoreductase htatip2 [OS=Homo sapiens]	4	HTATIP2	154032	308413	272528	65739.7	237555	89002.1
E9PIE4	High	Mitochondrial carrier homolog 2 [OS=Homo sapiens]	1	MTCH2	154198	90977.3	78421.7	65810.7	70075.2	25610.9
E9PIN5	High	Tumor protein p53-inducible protein 11 [OS=Homo sapiens]	2	TP53I11	44346	802182	50572.2	18926.6	617880	16515.9
E9PIX7	High	serine/threonine-protein kinase Nek5 [OS=Homo sapiens]	1	NEK5	21744.8	54669.9	30215.5	9280.51	42109.5	9867.76
E9PJ95	High	COMM domain-containing protein 9 [OS=Homo sapiens]	2	COMMD9	95526.6	69582	119053	40770.1	53595.5	38880.2
E9PK25	High	Cofilin-1 [OS=Homo sapiens]	5	CFL1	4.7621e+06	1.95709e+06	9.17676e+06	2.03243e+06	1.50745e+06	2.99694e+06
E9PKU7	High	Neutral alpha-glucosidase AB [OS=Homo sapiens]	2	GANAB	448021	554295	325984	191212	426945	106460
E9PL40	High	Tetraspanin-18 [OS=Homo sapiens]	1	TSPAN18	31050.6	-	44888	13252.2	-	14659.5
E9PLG8	High	Glycosylphosphatidylinositol anchor attachment 1 protein [OS=Homo sapiens]	2	GPAA1	180738	222095	138687	77137.7	171068	45292.3
E9PLN8	High	Uncharacterized protein [OS=Homo sapiens]	2	-	1.54554e+06	1.4571e+06	1.38484e+06	659625	1.12233e+06	452259
E9PM05	High	Etoposide-induced protein 2.4 homolog [OS=Homo sapiens]	2	EI24	74050	246602	102028	31604	189945	33320.3
E9PMR4	High	tetraspanin [OS=Homo sapiens]	4	CD151	1.05525e+07	1.15982e+07	1.31803e+07	4.50372e+06	8.93348e+06	4.30443e+06
E9PMT2	High	LIM domain only protein 7 [OS=Homo sapiens]	4	LMO7	-	165976	59373.2	-	127843	19390.1
E9PMV2	High	HLA class II histocompatibility antigen, DQ alpha 1 chain [OS=Homo sapiens]	2	HLA-DQA1	540719	380604	814416	230775	293160	265972
E9PN41	High	Tetraspanin-4 [OS=Homo sapiens]	3	TSPAN4	2.10068e+06	2.0551e+06	3.27711e+06	896556	1.58294e+06	1.07024e+06
E9PNM1	High	squalene synthase [OS=Homo sapiens]	6	FDFT1	216828	49304.7	57890	92540.7	37976.9	18905.7
E9PQ74	High	Growth arrest-specific protein 2 [OS=Homo sapiens]	3	GAS2	134569	148175	279818	57433.3	114132	91382.8
E9PQW4	High	Mitogen-activated protein kinase [OS=Homo sapiens]	2	MAPK3	209647	131498	204173	89476	101286	66678.8
E9PR17	High	CD59 glycoprotein [OS=Homo sapiens]	4	CD59	7.49672e+06	7.8497e+06	8.26729e+06	3.19954e+06	6.04622e+06	2.69993e+06
E9PR23	High	Immunoglobulin-like domain-containing receptor 2 [OS=Homo sapiens]	2	ILDR2	190791	237600	178920	81428.4	183011	58431.5
E9PR44	High	Alpha-crystallin B chain [OS=Homo sapiens]	9	-	9.61128e+06	7.1577e+06	7.15341e+06	4.10202e+06	5.51321e+06	2.33616e+06
E9PRJ8	High	tetraspanin [OS=Homo sapiens]	4	CD81	1.83853e+07	2.10227e+07	2.20373e+07	7.84671e+06	1.61928e+07	7.19693e+06
E9PRR9	High	Protein tyrosine phosphatase type IVA 2 [OS=Homo sapiens]	1	PTP4A2	24656.6	37115.3	47902.7	10523.2	28588	15644
E9PS99	High	Transmembrane 9 superfamily member [OS=Homo sapiens]	1	TM9SF1	97665.2	98754.4	78742.5	41682.8	76065.5	25715.7
F5GWG3	High	Retinoic acid-induced protein 3 [OS=Homo sapiens]	1	GPRC5A	201577	234017	170944	86031.4	180251	55827
F5GWH5	High	transmembrane protein 258 [OS=Homo sapiens]	1	TMEM258	188669	243051	119353	80522.6	187210	38978.4
F5GXS0	High	Complement C4-B [OS=Homo sapiens]	2	C4B	151181	327215	283354	64523.1	252037	92537.7
F5GXX5	High	Dolichyl-diphosphooligosaccharide--protein glycosyltransferase subunit DAD1 [OS=Homo sapiens]	3	DAD1	2.56061e+06	2.72827e+06	2.09257e+06	1.09285e+06	2.10145e+06	683391
F5GY03	High	Sparc [OS=Homo sapiens]	5	SPARC	301566	1.10413e+06	648294	128706	850457	211719
F5GYQ1	High	V-type proton ATPase subunit [OS=Homo sapiens]	11	ATP6V0D1	2.95411e+06	1.9813e+06	3.20092e+06	1.26079e+06	1.52609e+06	1.04536e+06
F5GZS6	High	4F2 cell-surface antigen heavy chain [OS=Homo sapiens]	23	SLC3A2	1.47637e+07	2.54815e+07	1.55507e+07	6.30102e+06	1.96271e+07	5.07854e+06
F5GZZ9	High	Scavenger receptor cysteine-rich type 1 protein M130 [OS=Homo sapiens]	12	CD163	96522.1	71469.1	50730.1	41194.9	55049	16567.4
F5H157	High	Ras-related protein Rab-35 [OS=Homo sapiens]	2	RAB35	50178.6	235045	45957.2	21415.9	181043	15008.7
F5H324	High	Arylsulfatase E [OS=Homo sapiens]	6	ARSE	274487	471255	266848	117149	362984	87147.1
F5H365	High	protein transport protein Sec23A [OS=Homo sapiens]	4	SEC23A	126082	211326	122657	53810.7	162774	40057.2
F5H4N4	High	Peroxisomal membrane protein 2 [OS=Homo sapiens]	3	PXMP2	507107	411664	383525	216429	317084	125252
F5H4Z7	High	Cob(I)yrinic acid a,c-diamide adenosyltransferase, mitochondrial [OS=Homo sapiens]	2	MMAB	94477	183871	91312.3	40322.1	141626	29820.8
F5H5A1	High	Acyl-CoA synthetase family member 3, mitochondrial [OS=Homo sapiens]	2	ACSF3	150165	46991.5	126327	64089.3	36195.2	41255.9
F5H5D3	High	tubulin alpha chain [OS=Homo sapiens]	2	TUBA1C	2.90093e+07	4.11442e+07	3.60083e+07	1.2381e+07	3.16913e+07	1.17596e+07
F5H5P2	High	Uncharacterized protein [OS=Homo sapiens]	9	-	1.46389e+06	1.45224e+06	1.05113e+06	624778	1.11859e+06	343278
F6IQE6	High	MHC class I antigen [OS=Homo sapiens]	1	HLA-C	113325	-	4.13992e+06	48366.4	-	1.35201e+06
F6IQY8	High	MHC class I antigen [OS=Homo sapiens]	1	HLA-A	1.34695e+06	3.38328e+06	2.36604e+06	574870	2.60597e+06	772701
F6WIT2	High	Serine/threonine-protein phosphatase 2A activator [OS=Homo sapiens]	1	PPP2R4; PTPA	53914.6	26414	75817.6	23010.3	20345.4	24760.5
F8VQX6	High	methyltransferase-like protein 7A [OS=Homo sapiens]	6	METTL7A	8.04052e+06	1.01268e+07	5.61249e+06	3.43163e+06	7.80013e+06	1.83293e+06
F8VSI7	High	Bax inhibitor 1 [OS=Homo sapiens]	2	TMBIM6	320198	374157	297196	136658	288194	97058.3
F8VU90	High	peptidylprolyl isomerase [OS=Homo sapiens]	3	FKBP11	141139	296029	329409	60237.2	228016	107578
F8VV59	High	Nucleosome assembly protein 1-like 1 [OS=Homo sapiens]	2	NAP1L1	93575.5	23647.7	129179	39937.3	18214.6	42187.4
F8VX58	High	decorin [OS=Homo sapiens]	1	DCN	38035.8	37595	79025.8	16233.4	28957.5	25808.2
F8VXU5	High	Vacuolar protein sorting-associated protein 29 [OS=Homo sapiens]	1	VPS29	46921.5	28954.4	98577.4	20025.7	22302.1	32193.4
F8VXU8	High	Transmembrane and TPR repeat-containing protein 1 [OS=Homo sapiens]	1	TMTC1	34631.1	56308.2	53733.4	14780.3	43371.3	17548.2
F8VYN9	High	ADP-ribosylation factor-like protein 1 [OS=Homo sapiens]	3	ARL1	413217	194314	213261	176358	149670	69646.8
F8W0A3	High	proliferation-associated protein 2G4 [OS=Homo sapiens]	1	PA2G4	120984	141709	153530	51634.9	109151	50139.9
F8W0N3	High	monocarboxylate transporter 2 [OS=Homo sapiens]	2	SLC16A7	243985	178434	92178.7	104131	137438	30103.7
F8W0P7	High	ATP synthase subunit beta, mitochondrial [OS=Homo sapiens]	1	ATP5F1B	58139.2	84371.6	46898.2	24813.4	64987.2	15316
F8W1B7	Medium	Matrix metalloproteinase [OS=Homo sapiens]	1	MMP14	130218	182271	111543	55576.1	140394	36427.6
F8W6I7	High	Heterogeneous nuclear ribonucleoprotein A1 [OS=Homo sapiens]	5	HNRNPA1	657260	468186	1.06735e+06	280514	360620	348574
F8W717	High	Echinoderm microtubule-associated protein-like 1 [OS=Homo sapiens]	7	EML1	254986	214526	771078	108826	165239	251818
F8W7Q4	High	Protein FAM162A [OS=Homo sapiens]	4	FAM162A	1.65187e+06	2.17841e+06	1.07976e+06	705005	1.67792e+06	352626
F8W809	High	Thioredoxin reductase 1, cytoplasmic [OS=Homo sapiens]	2	TXNRD1	142954	63114.2	222942	61011.5	48613.6	72808.3
F8W8H5	High	Ras-related protein Rab-24 [OS=Homo sapiens]	3	RAB24	231629	151061	163532	98857.6	116354	53406.2
F8W9P7	High	NFU1 iron-sulfur cluster scaffold homolog, mitochondrial [OS=Homo sapiens]	2	NFU1	-	143692	88607.7	-	110678	28937.5
F8W9T3	High	sorting nexin-4 [OS=Homo sapiens]	2	SNX4	15157.7	36109.1	38491	6469.17	27813	12570.4
F8WAN9	High	GMP reductase [OS=Homo sapiens]	3	GMPR2	349920	97613.5	408578	149343	75186.8	133433
F8WAZ1	Medium	mitogen-activated protein kinase kinase kinase kinase 3 [OS=Homo sapiens]	1	MAP4K3	32512.2	140776	43815.4	13876	108432	14309.2
F8WF27	High	Transmembrane 4 L6 family member 1 [OS=Homo sapiens]	1	TM4SF1	246682	447158	312977	105282	344423	102212
F8WJN3	High	Cleavage and polyadenylation-specificity factor subunit 6 [OS=Homo sapiens]	2	CPSF6	22393.8	32967.9	17511.2	9557.52	25393.5	5718.8
G0Z2K6	High	MHC class I antigen [OS=Homo sapiens]	2	HLA-B	125752	29380.9	2.44496e+06	53669.9	22630.6	798473
G1UI17	High	glycogen debranching enzyme [OS=Homo sapiens]	3	AGL	149253	-	50707.9	63700.2	-	16560.2
G1UI26	High	neuroblastoma-amplified sequence [OS=Homo sapiens]	3	NBAS	-	76108.9	16137.4	-	58622.8	5270.16
G1UI32	High	Pyridoxal kinase [OS=Homo sapiens]	1	PDXK	156513	-	213790	66798.4	-	69819.3
G3V0I5	High	NADH dehydrogenase [ubiquinone] flavoprotein 1, mitochondrial [OS=Homo sapiens]	23	NDUFV1	2.39314e+07	1.5013e+07	8.82544e+06	1.02137e+07	1.15637e+07	2.88221e+06
G3V158	High	2-deoxyribose-5-phosphate aldolase homolog (C. elegans), isoform CRA_a [OS=Homo sapiens]	3	DERA	185801	155435	227267	79298.6	119724	74220.6
G3V180	High	dipeptidyl peptidase 3 [OS=Homo sapiens]	3	DPP3	194861	16048.2	197674	83165.1	12361.1	64556.4
G3V1B2	High	Solute carrier family 39 (Zinc transporter), member 13, isoform CRA_a [OS=Homo sapiens]	1	SLC39A13	-	29030.7	38023.1	-	22360.9	12417.6
G3V207	High	Transmembrane and coiled-coil domain family 3, isoform CRA_c [OS=Homo sapiens]	3	TMCC3	206587	303033	142078	88169.8	233411	46399.6
G3V2S6	High	V-type proton ATPase subunit D [OS=Homo sapiens]	5	ATP6V1D	1.58284e+06	948710	1.0076e+06	675543	730744	329062
G3V2S9	High	SRA stem-loop-interacting RNA-binding protein, mitochondrial [OS=Homo sapiens]	5	SLIRP	1.83858e+06	728258	1.27273e+06	784692	560940	415646
G3V325	High	ATP5J2-PTCD1 readthrough [OS=Homo sapiens]	2	ATP5J2-PTCD1	2.01034e+07	1.06844e+07	8.20808e+06	8.57997e+06	8.22962e+06	2.68059e+06
G3V3E8	High	Epididymal secretory protein E1 [OS=Homo sapiens]	5	NPC2	1.25841e+06	695008	1.96986e+06	537079	535329	643317
G3V426	High	Uncharacterized aarF domain-containing protein kinase 1 [OS=Homo sapiens]	1	ADCK1	96274.6	44931.2	-	41089.3	34608.2	-
G3V4P8	High	glia maturation factor beta [OS=Homo sapiens]	1	GMFB	42941.5	21402.6	73773.2	18327.1	16485.3	24092.8
G3V4U0	High	Fibulin-5 [OS=Homo sapiens]	4	FBLN5	23408.4	74751.5	66455.1	9990.52	57577.3	21702.9
G3V583	High	Protein FAM177A1 [OS=Homo sapiens]	3	FAM177A1	135947	296625	239515	58021	228475	78220.6
G3V599	High	Endoplasmic reticulum export factor CTAGE5 [OS=Homo sapiens]	10	MIA2	318276	525406	277623	135838	404693	90666
G3V5N8	Medium	Zinc finger FYVE domain-containing protein 1 [OS=Homo sapiens]	1	ZFYVE1	122733	99158.9	58561.6	52381.5	76377.1	19125
G3V5X4	High	Nesprin-2 [OS=Homo sapiens]	14	SYNE2	115529	74925.9	186788	49306.9	57711.6	61001
G5D8C8	High	Cytochrome c oxidase subunit 2 [OS=Homo sapiens]	2	COX2	5.3936e+07	3.08805e+07	2.03225e+07	2.30195e+07	2.37857e+07	6.63691e+06
G5E972	High	Lamina-associated polypeptide 2, isoforms beta/gamma [OS=Homo sapiens]	12	TMPO	103586	1.86689e+06	72803.4	44209.8	1.43797e+06	23776.1
G5E9D8	High	inter-alpha (globulin) inhibitor H5, isoform CRA_e [OS=Homo sapiens]	5	ITIH5	13415.2	81242.9	18134	5725.5	62577.3	5922.18
G5E9Z2	High	Cisplatin resistance related protein CRR9p, isoform CRA_c [OS=Homo sapiens]	5	CLPTM1L	467529	596964	424871	199538	459811	138754
G5EA09	High	syndecan binding protein (syntenin), isoform CRA_a [OS=Homo sapiens]	2	SDCBP	474734	442000	430660	202613	340450	140645
G8JLD5	High	Dynamin-1-like protein [OS=Homo sapiens]	1	DNM1L	38008.3	29614.8	48317	16221.7	22810.8	15779.4
G8JLH6	High	tetraspanin [OS=Homo sapiens]	5	CD9	1.96653e+07	8.63813e+06	1.15274e+07	8.39301e+06	6.65351e+06	3.76462e+06
G9IE74	High	NADH-ubiquinone oxidoreductase chain 5 [OS=Homo sapiens]	7	ND5	4.35932e+06	3.41612e+06	963607	1.86053e+06	2.63127e+06	314694
G9LKS5	High	Cytochrome c oxidase subunit 1 [OS=Homo sapiens]	4	COX1	3.75445e+06	2.02962e+06	1.61301e+06	1.60237e+06	1.56331e+06	526777
H0UI05	High	Solute carrier family 17 (Anion/sugar transporter), member 5, isoform CRA_a [OS=Homo sapiens]	2	SLC17A5	134144	151604	104922	57251.7	116773	34265.4
H0UI22	High	Arginyl-tRNA synthetase-like, isoform CRA_e [OS=Homo sapiens]	1	RARS2	32819	37500.1	26181.7	14006.9	28884.4	8550.4
H0UI49	High	laminin, alpha 4, isoform CRA_b [OS=Homo sapiens]	1	LAMA4	61015.3	21576.7	37188.9	26040.9	16619.4	12145.2
H0Y2W2	High	ATPase family AAA domain-containing protein 3A [OS=Homo sapiens]	10	ATAD3A	2.19383e+06	1.79045e+06	1.12352e+06	936312	1.37909e+06	366919
H0Y368	High	Dolichol-phosphate mannosyltransferase subunit 1 [OS=Homo sapiens]	6	DPM1	1.69196e+06	1.15044e+06	1.24495e+06	722115	886123	406576
H0Y430	High	Sulfhydryl oxidase [OS=Homo sapiens]	2	QSOX2	102081	79242.3	87039.8	43567.4	61036.3	28425.4
H0Y449	High	Nuclease-sensitive element-binding protein 1 [OS=Homo sapiens]	1	YBX1	35372.9	37963	61105.9	15096.9	29241	19956
H0Y4Y2	High	N-acyl-phosphatidylethanolamine-hydrolyzing phospholipase D [OS=Homo sapiens]	1	NAPEPLD	74835.9	61395.3	102674	31939.4	47289.7	33531.3
H0Y5K5	High	Endoplasmic reticulum-Golgi intermediate compartment protein 3 [OS=Homo sapiens]	4	ERGIC3	333750	520588	463345	142442	400983	151319
H0Y742	High	SUN domain-containing protein 1 [OS=Homo sapiens]	16	SUN1	3.36542e+06	1.86228e+06	3.52481e+06	1.43634e+06	1.43442e+06	1.15113e+06
H0Y7D3	Medium	Chromosome transmission fidelity protein 18 homolog [OS=Homo sapiens]	1	CHTF18	55612	83256.6	61452.7	23734.8	64128.3	20069.2
H0Y7K4	High	Large proline-rich protein BAG6 (Fragment) OS=Homo sapiens GN=BAG6 PE=1 SV=1	1	BAG6	6902.05	43230.4	-	2945.74	33298.2	-
H0Y8C6	High	Importin-5 [OS=Homo sapiens]	9	IPO5	436439	439042	409619	186269	338171	133773
H0Y8G5	High	heterogeneous nuclear ribonucleoprotein D0 [OS=Homo sapiens]	3	HNRNPD	328470	375631	457589	140189	289330	149439
H0YBD2	High	Cytochrome c oxidase subunit 7A-related protein, mitochondrial [OS=Homo sapiens]	4	COX7A2L	1.34768e+06	1.32577e+06	630011	575178	1.02117e+06	205749
H0YBL1	Medium	Inositol-1-monophosphatase [OS=Homo sapiens]	1	IMPA1	84525.9	27888.4	111436	36075	21481	36392.6
H0YBX6	High	Ubiquitin-conjugating enzyme E2 variant 2 [OS=Homo sapiens]	2	UBE2V2	311293	122182	408931	132858	94110.3	133548
H0YD74	High	Complex I assembly factor TMEM126B, mitochondrial [OS=Homo sapiens]	1	TMEM126B	20121.8	35002.4	-	8587.84	26960.6	-
H0YET1	Medium	Liprin-beta-2 [OS=Homo sapiens]	1	PPFIBP2	70406.5	79484.4	220198	30049	61222.8	71912.1
H0YEW4	High	ATP synthase mitochondrial F1 complex assembly factor 1 [OS=Homo sapiens]	1	ATPAF1	56661.6	27204.6	47199.4	24182.8	20954.3	15414.4
H0YF29	High	UPF0598 protein C8orf82 [OS=Homo sapiens]	3	C8orf82	268320	217672	180776	114517	167661	59037.7
H0YHA7	High	60S ribosomal protein L18 [OS=Homo sapiens]	4	RPL18	968019	433321	942376	413143	333765	307761
H0YHF8	High	5'-AMP-activated protein kinase subunit gamma-1 [OS=Homo sapiens]	3	PRKAG1	519758	139041	403641	221829	107096	131821
H0YIC4	High	citrate synthase [OS=Homo sapiens]	1	CS	82681.4	83078.8	118754	35287.8	63991.4	38782.5
H0YJG7	High	activator of 90 kDa heat shock protein ATPase homolog 1 [OS=Homo sapiens]	1	AHSA1	48663.4	46848.7	89866.2	20769.2	36085.2	29348.5
H0YJR0	High	Ribosomal protein S6 kinase-like 1 (Fragment) OS=Homo sapiens GN=RPS6KL1 PE=4 SV=1	1	RPS6KL1	157112	137806	245032	67054.2	106145	80022.5
H0YKD8	High	60S ribosomal protein L28 [OS=Homo sapiens]	1	RPL28	101522	65393.6	81609.1	43328.9	50369.4	26651.9
H0YKQ5	High	Kinesin-like protein [OS=Homo sapiens]	1	-	59202.4	17971.9	-	25267.2	13842.8	-
H0YKR4	High	Ceramide synthase 4 [OS=Homo sapiens]	3	CERS4	233568	187853	110316	99685.3	144694	36027
H0YMG7	High	retinal dehydrogenase 2 [OS=Homo sapiens]	3	ALDH1A2	161658	24575.4	568832	68994.6	18929.2	185769
H0YN48	High	Uveal autoantigen with coiled-coil domains and ankyrin repeats [OS=Homo sapiens]	2	UACA	54993.7	146834	180114	23470.9	113099	58821.5
H0YNB7	High	Complex I intermediate-associated protein 30, mitochondrial [OS=Homo sapiens]	2	NDUFAF1	142373	43155.5	44036.9	60763.6	33240.5	14381.6
H0YNE9	High	Ras-related protein Rab-8B [OS=Homo sapiens]	2	RAB8B	82589.8	265025	137197	35248.7	204136	44805.8
H0YNG3	High	Signal peptidase complex catalytic subunit SEC11 [OS=Homo sapiens]	5	SEC11A	3.12435e+06	2.54237e+06	2.76116e+06	1.33345e+06	1.95826e+06	901740
H3BMD2	High	Carnitine O-palmitoyltransferase 1, liver isoform [OS=Homo sapiens]	1	CPT1A	51902.9	26785.6	-	22151.8	20631.6	-
H3BN98	High	Uncharacterized protein [OS=Homo sapiens]	1	-	1.38945e+06	739258	1.17147e+06	593009	569413	382577
H3BND3	High	Cleavage and polyadenylation-specificity factor subunit 5 [OS=Homo sapiens]	5	NUDT21	162679	148228	236048	69430.2	114173	77088.3
H3BNT7	High	26S proteasome non-ATPase regulatory subunit 7 [OS=Homo sapiens]	1	PSMD7	97496.5	60865.6	160054	41610.8	46881.7	52270.3
H3BPE1	High	Microtubule-actin cross-linking factor 1, isoforms 1/2/3/5 [OS=Homo sapiens]	14	MACF1	355632	460531	563287	151781	354724	183958
H3BPY4	Medium	Transmembrane protein 231 [OS=Homo sapiens]	1	TMEM231	42317.6	47369.9	42199.6	18060.8	36486.7	13781.5
H3BQZ7	High	hCG2044799 [OS=Homo sapiens]	7	HNRNPUL2-BSCL2	197960	691972	267463	84488	532991	87348
H3BR29	High	RUS1 family protein C16orf58 [OS=Homo sapiens]	6	RUSF1	687750	659495	645120	293527	507975	210683
H3BRV9	High	nuclear transport factor 2 [OS=Homo sapiens]	1	NUTF2	37645.7	-	42280.4	16066.9	-	13807.9
H3BT29	High	Protein PML [OS=Homo sapiens]	1	PML	-	78797.7	74892.3	-	60693.8	24458.3
H3BT71	High	RNA-binding motif protein, X chromosome [OS=Homo sapiens]	3	RBMX	329072	727104	452596	140446	560051	147809
H3BUD0	High	E3 ubiquitin-protein ligase CHIP [OS=Homo sapiens]	1	STUB1	34160.8	80344.1	46856.4	14579.6	61885	15302.3
H3BUU9	High	Cadherin-11 [OS=Homo sapiens]	1	CDH11	80810.8	84007.2	98239.3	34489.4	64706.5	32083
H3BVG0	High	Nuclear pore complex protein Nup93 [OS=Homo sapiens]	13	NUP93	234174	1.39894e+06	363305	99943.7	1.07753e+06	118648
H3BVI6	High	Calponin [OS=Homo sapiens]	1	CNN2	20729.4	72842.9	66056	8847.15	56107.2	21572.5
H6VRF8	High	keratin 1 [OS=Homo sapiens]	42	KRT1	7.89193e+08	6.86857e+08	1.05599e+09	3.36822e+08	5.29051e+08	3.44866e+08
H7BXI1	High	Extended synaptotagmin-2 [OS=Homo sapiens]	13	ESYT2	238612	2.67949e+06	272912	101838	2.06387e+06	89127.4
H7BXI3	High	Transmembrane protein 26 [OS=Homo sapiens]	2	TMEM26	58298.5	180689	231762	24881.4	139176	75688.9
H7BXZ6	High	Mitochondrial Rho GTPase [OS=Homo sapiens]	7	RHOT1	929407	1.18933e+06	669658	396664	916083	218697
H7BYY1	High	Tropomyosin 1 (Alpha), isoform CRA_m [OS=Homo sapiens]	1	TPM1	81539.1	75118.9	177908	34800.3	57860.3	58101.1
H7BZ19	High	HCLS1-binding protein 3 (Fragment) OS=Homo sapiens GN=HS1BP3 PE=1 SV=1	1	HS1BP3	126534	257234	395192	54003.8	198135	129062
H7BZJ3	High	Protein disulfide-isomerase A3 [OS=Homo sapiens]	1	PDIA3	2.21539e+06	4.87278e+06	3.86466e+06	945511	3.75325e+06	1.26212e+06
H7BZK0	High	Sarcolemmal membrane-associated protein [OS=Homo sapiens]	7	SLMAP	175492	294441	63019.1	74898.5	226793	20580.7
H7C0B3	High	Transmembrane protein 87B [OS=Homo sapiens]	2	TMEM87B	150055	214947	167160	64042.2	165563	54590.9
H7C0I2	High	T-cell surface glycoprotein CD1b [OS=Homo sapiens]	1	CD1B	708213	232412	1.73216e+06	302260	179015	565690
H7C1L1	High	Adhesion G protein-coupled receptor A2 [OS=Homo sapiens]	1	ADGRA2	47534.8	91158.4	94567.5	20287.5	70214.7	30883.8
H7C1N3	High	BET1 homolog [OS=Homo sapiens]	2	BET1	153116	240628	127114	65348.9	185344	41513
H7C2R7	High	Spermine synthase [OS=Homo sapiens]	2	SMS	113336	11431.9	178115	48371.1	8805.45	58168.8
H7C3V9	High	selenocysteine lyase [OS=Homo sapiens]	1	SCLY	24677.5	5394.1	41309.9	10532.2	4154.8	13491
H7C4T5	Medium	Muscleblind-like protein 1 (Fragment) OS=Homo sapiens GN=MBNL1 PE=1 SV=1	1	MBNL1	274391	248360	326206	117108	191299	106532
H7C4X8	Medium	CLIP-associating protein 2 (Fragment) OS=Homo sapiens GN=CLASP2 PE=1 SV=1	1	CLASP2	813800	668734	1.13677e+06	347324	515092	371247
H7C519	High	5'-nucleotidase domain-containing protein 2 [OS=Homo sapiens]	1	NT5DC2	47598.7	66502.7	77791.1	20314.8	51223.6	25405
H9BQ97	High	MHC class I antigen [OS=Homo sapiens]	1	HLA-B	-	386618	102251	-	297792	33393.1
H9KV45	High	Ubiquitin-conjugating enzyme E2 D3 [OS=Homo sapiens]	2	UBE2D3	250707	110335	346840	107000	84985.3	113271
I0B0K8	High	Truncated profilaggrin [OS=Homo sapiens]	1	FLG	182567	159625	317581	77918.2	122951	103715
I1Z9G3	High	6-phosphofructo-2-kinase/fructose-2, 6-biphosphatase 1 splice variant 3 [OS=Homo sapiens]	1	PFKFB1	71424	-	59282.8	30483.2	-	19360.6
I3L1L3	High	Myb-binding protein 1A [OS=Homo sapiens]	2	MYBBP1A	12939.7	52849.1	29603.3	5522.58	40707	9667.84
I3L397	High	eukaryotic translation initiation factor 5A [OS=Homo sapiens]	6	EIF5A	585638	158555	814456	249946	122127	265985
I3L3P7	High	40S ribosomal protein S15a [OS=Homo sapiens]	1	RPS15A	148398	63807.5	123495	63335	49147.7	40330.9
I3L3X1	High	Claudin [OS=Homo sapiens]	2	CLDN7	59455	42020.5	33783.9	25375	32366.3	11033.1
I3L4A1	High	charged multivesicular body protein 6 [OS=Homo sapiens]	3	CHMP6	148525	513058	143744	63389.5	395182	46943.9
I3L4X2	High	Multidrug resistance-associated protein 1 [OS=Homo sapiens]	13	ABCC1	857403	1.52415e+06	1.219e+06	365933	1.17397e+06	398102
I3L4Z6	High	Golgi SNAP receptor complex member 2 [OS=Homo sapiens]	4	GOSR2	99012.2	498758	24606.3	42257.7	384168	8035.91
I3L526	High	Brain-specific angiogenesis inhibitor 1-associated protein 2 [OS=Homo sapiens]	1	BAIAP2	53316.5	37861.3	56780.8	22755.1	29162.6	18543.5
I6L8B7	High	Fatty acid-binding protein, epidermal [OS=Homo sapiens]	4	FABP5	400625	250470	515901	170984	192924	168483
J3KND8	High	phenylalanine-4-hydroxylase [OS=Homo sapiens]	5	PAH	431841	66439.5	130610	184307	51175	42654.5
J3KNF8	High	Cytochrome b5 type B [OS=Homo sapiens]	4	CYB5B	3.16424e+06	2.17689e+06	2.45211e+06	1.35047e+06	1.67675e+06	800809
J3KNQ4	High	alpha-parvin [OS=Homo sapiens]	8	PARVA	828711	1.65641e+06	1.9782e+06	353688	1.27585e+06	646039
J3KQ48	High	Peptidyl-tRNA hydrolase 2, mitochondrial [OS=Homo sapiens]	2	PTRH2	133303	142838	97271.2	56892.6	110021	31766.8
J3KR23	High	IST1 homolog [OS=Homo sapiens]	6	IST1	1.66313e+06	880186	1.46972e+06	709812	677962	479981
J3KR44	High	Ubiquitin thioesterase [OS=Homo sapiens]	3	OTUB1	224753	93779.8	361715	95922.7	72233.8	118129
J3KRC4	High	5'(3')-deoxyribonucleotidase, cytosolic type [OS=Homo sapiens]	1	NT5C	80104	-	83826.8	34187.8	-	27376.1
J3KRX5	High	60S ribosomal protein L17 [OS=Homo sapiens]	2	RPL17	25358.8	26159.9	-	10823	20149.7	-
J3KS15	High	Peptidyl-tRNA hydrolase ICT1, mitochondrial [OS=Homo sapiens]	1	MRPL58	55344.3	49133.5	-	23620.6	37845	-
J3KS22	High	L-xylulose reductase [OS=Homo sapiens]	12	DCXR	1.86332e+07	6.42694e+06	7.28174e+06	7.95253e+06	4.95034e+06	2.37807e+06
J3KT75	High	Mannose-P-dolichol utilization defect 1 protein [OS=Homo sapiens]	3	MPDU1	1.37462e+06	1.40608e+06	1.11483e+06	586677	1.08303e+06	364082
J3KTC7	High	nuclear pore complex protein Nup85 [OS=Homo sapiens]	1	NUP85	161708	100987	87485	69015.9	77784.8	28570.8
J3KTJ8	High	60S ribosomal protein L26 [OS=Homo sapiens]	1	-	94686.3	43750	92327.6	40411.4	33698.4	30152.3
J3QL56	High	Protein SCO1 homolog, mitochondrial [OS=Homo sapiens]	4	SCO1	1.28567e+06	928702	877532	548714	715332	286584
J3QL71	High	Secernin-2 [OS=Homo sapiens]	4	SCRN2	184319	159869	681142	78666.2	123139	222447
J3QLR8	High	28S ribosomal protein S23, mitochondrial [OS=Homo sapiens]	3	MRPS23	257862	131218	89887.4	110053	101071	29355.4
J3QLU9	High	Receptor protein-tyrosine kinase [OS=Homo sapiens]	1	ERBB2	-	28482.3	40886.3	-	21938.5	13352.6
J3QQM1	High	26S proteasome regulatory subunit 8 [OS=Homo sapiens]	1	PSMC5	53317	63650.1	85075.7	22755.3	49026.5	27784
J3QQX6	High	Intercellular adhesion molecule 2 [OS=Homo sapiens]	3	ICAM2	993293	1.14074e+06	947197	423930	878651	309335
J3QRG5	High	Uncharacterized protein C17orf62 [OS=Homo sapiens]	2	CYBC1	147799	145950	151951	63079.6	112418	49624.2
J3QRN6	High	Unconventional myosin-Id [OS=Homo sapiens]	7	MYO1D	383785	450614	479839	163797	347085	156706
J3QRR0	High	von Willebrand factor A domain-containing protein 1 [OS=Homo sapiens]	2	VWA1	-	52161.7	129591	-	40177.6	42321.9
J3QRU1	High	Tyrosine-protein kinase [OS=Homo sapiens]	2	YES1	197286	405321	352733	84200.2	312198	115195
J3QRU4	High	Vesicle-associated membrane protein 2 [OS=Homo sapiens]	1	VAMP2	1.12237e+06	3.37776e+06	1.31151e+06	479017	2.60172e+06	428313
J3QS81	High	Neuritin-like protein [OS=Homo sapiens]	1	NRN1L	53775.6	141802	89178.1	22951	109223	29123.7
J3QTA6	High	MICOS complex subunit [OS=Homo sapiens]	2	CHCHD6	284875	158297	28297.9	121582	121928	9241.51
J3QTR3	High	Ubiquitin-40S ribosomal protein S27a [OS=Homo sapiens]	5	RPS27A	5.40548e+06	2.0571e+07	6.19119e+06	2.30702e+06	1.58448e+07	2.02192e+06
J9R021	High	Eukaryotic translation initiation factor 3 subunit A [OS=Homo sapiens]	8	EIF3A	426033	235137	698825	181828	181114	228222
K4RH61	Medium	matrix metalloproteinase 14 (membrane-inserted) [OS=Homo sapiens]	1	MMP14	51644.2	23601.6	-	22041.4	18179.1	-
K7EIG1	High	Clustered mitochondria protein homolog [OS=Homo sapiens]	1	CLUH	46095.6	-	36318.6	19673.3	-	11860.9
K7EJH8	High	Alpha-actinin-4 [OS=Homo sapiens]	2	ACTN4	446824	477871	355768	190701	368080	116187
K7EKP8	Medium	cytosolic acyl coenzyme A thioester hydrolase [OS=Homo sapiens]	1	ACOT7	23891.1	55231.4	38591.5	10196.5	42542	12603.2
K7EKQ2	High	Hsp90 co-chaperone Cdc37 [OS=Homo sapiens]	1	CDC37	45352.6	81080.8	107430	19356.2	62452.4	35084.3
K7EKY5	High	Carbonic anhydrase 4 [OS=Homo sapiens]	3	CA4	125425	153487	22084.8	53530.6	118223	7212.43
K7ELC7	High	60S ribosomal protein L27 [OS=Homo sapiens]	1	RPL27	146287	47963.4	129211	62434.4	36943.8	42197.6
K7ELF1	High	39S ribosomal protein L4, mitochondrial [OS=Homo sapiens]	2	MRPL4	157092	144048	-	67045.6	110953	-
K7ENZ6	High	Reticulophagy regulator 3 [OS=Homo sapiens]	1	RETREG3	117760	76304	90786.9	50259.1	58773.1	29649.2
K7EPK9	Medium	Dynamin-2 (Fragment) OS=Homo sapiens GN=DNM2 PE=1 SV=8	1	DNM2	274735	395666	234354	117255	304761	76535.2
K7EPQ7	High	Protein YIF1B [OS=Homo sapiens]	1	YIF1B	247659	174931	221058	105699	134741	72192.9
K7EQZ3	High	Uncharacterized protein [OS=Homo sapiens]	1	-	19068.5	32818.6	-	8138.3	25278.5	-
K7ER16	High	Phenylalanine--tRNA ligase alpha subunit [OS=Homo sapiens]	1	FARSA	15119.9	-	50070.9	6453.08	-	16352.1
K7ERE1	High	TMEM256-PLSCR3 readthrough (NMD candidate) [OS=Homo sapiens]	1	TMEM256-PLSCR3	892287	649864	466558	380821	500557	152368
K7ERP4	High	Glutathione peroxidase [OS=Homo sapiens]	5	GPX4	2.08411e+06	813923	902642	889481	626924	294785
K7ERQ2	Medium	Protein FAM210A [OS=Homo sapiens]	1	FAM210A	165385	98282.3	92010.2	70585.2	75701.8	30048.7
K7ERZ3	High	Perilipin-3 [OS=Homo sapiens]	7	PLIN3	15052	304372	402992	6424.1	234443	131609
L0R5A1	Medium	Alternative protein CSF2RB [OS=Homo sapiens]	1	CSF2RB	2.09098e+07	1.35813e+07	3.4104e+07	8924168	1.0461e+07	11137679
L0R5D5	High	alternative protein TMEM70 [OS=Homo sapiens]	2	TMEM70	483134	297281	396973	206198	228981	129643
L0R6Q1	High	SLC35A4 upstream open reading frame protein [OS=Homo sapiens]	3	SLC35A4	707344	1.24146e+06	622395	301889	956235	203262
L7XP46	High	Cytochrome c oxidase subunit 1 [OS=Homo sapiens]	3	COX1	-	159685	36830.7	-	122998	12028.2
L8E9P9	Medium	alternative protein C2orf54 [OS=Homo sapiens]	1	C2orf54	181115	125080	79856.8	77298.5	96343.2	26079.6
L8EAA2	Medium	alternative protein C4orf41 [OS=Homo sapiens]	1	TRAPPC11	33032.3	37509.4	30432.3	14097.9	28891.6	9938.57
L8EAX5	High	Alternative protein NOTCH1 [OS=Homo sapiens]	1	NOTCH1	224337	217656	397554	95745.5	167649	129833
L8EC91	High	Alternative protein EGF [OS=Homo sapiens]	2	EGF	71611.2	157164	165265	30563.1	121055	53972.2
M0QWZ7	High	Serine--tRNA ligase, mitochondrial [OS=Homo sapiens]	6	SARS2	456435	535420	488109	194803	412407	159406
M0QXN5	High	nuclear pore glycoprotein p62 [OS=Homo sapiens]	2	NUP62	28342.4	117503	143889	12096.3	90506.9	46991.1
M0QXS5	High	Heterogeneous nuclear ribonucleoprotein L [OS=Homo sapiens]	5	HNRNPL	300721	178703	398590	128345	137646	130171
M0QYS1	High	60S ribosomal protein L13a [OS=Homo sapiens]	4	RPL13A	295847	175795	331346	126265	135406	108211
M0QZF4	Medium	SH3KBP1-binding protein 1 [OS=Homo sapiens]	1	SHKBP1	572529	711163	222940	244351	547773	72807.8
M0R080	High	dnaJ homolog subfamily B member 1 [OS=Homo sapiens]	3	DNAJB1	74300.1	482850	91964.7	31710.7	371915	30033.8
M0R0R2	High	40S ribosomal protein S5 [OS=Homo sapiens]	4	RPS5	1.56395e+06	746322	1.88825e+06	667481	574854	616665
M0R122	High	Epithelial membrane protein 3 [OS=Homo sapiens]	1	EMP3	402488	547627	595100	171779	421809	194348
M0R210	High	40S ribosomal protein S16 [OS=Homo sapiens]	2	RPS16	267810	121635	256587	114299	93689.5	83796.2
M0R261	Medium	6-phosphogluconolactonase [OS=Homo sapiens]	1	PGLS	95651.3	39600.2	129664	40823.2	30502	42345.8
M0R299	High	rRNA 2'-O-methyltransferase fibrillarin [OS=Homo sapiens]	2	FBL	32912	52007.2	32231	14046.6	40058.5	10526
M0R2A0	High	ER membrane protein complex subunit 10 [OS=Homo sapiens]	2	EMC10	229691	265863	146423	98030.3	204781	47818.8
M1V485	High	Tyrosine-protein kinase receptor [OS=Homo sapiens]	3	SLC34A2-ROS1	49421.8	36952.9	72782.8	21092.9	28463	23769.4
M1VE83	High	Tyrosine-protein kinase receptor [OS=Homo sapiens]	1	SDC4-ROS1_S4;R34	24170.3	17467.6	-	10315.7	13454.4	-
M4QHP2	High	Piezo-type mechanosensitive ion channel component [OS=Homo sapiens]	7	PIEZO1	475011	572888	498524	202731	441267	162808
O00116	High	Alkyldihydroxyacetonephosphate synthase, peroxisomal [OS=Homo sapiens]	16	AGPS	1.86425e+06	1.45784e+06	1.57374e+06	795648	1.1229e+06	513951
O00159-1	High	Unconventional myosin-Ic [OS=Homo sapiens]	27	MYO1C	6.89173e+06	6.53279e+06	7.84654e+06	2.94134e+06	5.03188e+06	2.56252e+06
O00161	High	Synaptosomal-associated protein 23 [OS=Homo sapiens]	6	SNAP23	358554	765607	635611	153028	589708	207578
O00186	High	syntaxin-binding protein 3 [OS=Homo sapiens]	8	STXBP3	78142.8	1.17351e+06	414795	33350.8	903899	135464
O00217	High	NADH dehydrogenase [ubiquinone] iron-sulfur protein 8, mitochondrial [OS=Homo sapiens]	7	NDUFS8	1.10046e+07	4.95841e+06	4.70306e+06	4.69669e+06	3.81921e+06	1.53592e+06
O00231	High	26S proteasome non-ATPase regulatory subunit 11 [OS=Homo sapiens]	2	PSMD11	96716.6	27646.3	96225	41277.9	21294.5	31425.1
O00232-1	High	26s proteasome non-atpase regulatory subunit 12 [OS=Homo sapiens]	3	PSMD12	221825	75714.6	254945	94673.4	58319.1	83260
O00264	High	Membrane-associated progesterone receptor component 1 [OS=Homo sapiens]	9	PGRMC1	5.08469e+06	5.95739e+06	5.06034e+06	2.17011e+06	4.58868e+06	1.6526e+06
O00291	High	Huntingtin-interacting protein 1 [OS=Homo sapiens]	9	HIP1	64404.4	1.20077e+06	147147	27487.3	924889	48055.3
O00330-1	High	Pyruvate dehydrogenase protein X component, mitochondrial [OS=Homo sapiens]	4	PDHX	285065	179185	84296.3	121663	138017	27529.5
O00338	High	Sulfotransferase 1C2 [OS=Homo sapiens]	1	SULT1C2	125517	55473.1	179092	53569.7	42728.1	58487.7
O00400	High	Acetyl-coenzyme A transporter 1 [OS=Homo sapiens]	6	SLC33A1	519135	809519	430274	221563	623532	140519
O00461	High	Golgi integral membrane protein 4 [OS=Homo sapiens]	3	GOLIM4	319794	560767	267374	136486	431931	87319
O00468-3	High	Isoform 3 of Agrin [OS=Homo sapiens]	41	AGRN	1.20922e+06	2.00346e+07	3.46004e+06	516084	1.54316e+07	1.12998e+06
O00476-1	High	Sodium-dependent phosphate transport protein 4 [OS=Homo sapiens]	2	SLC17A3	187377	208979	122759	79971	160966	40090.5
O00481-1	High	Butyrophilin subfamily 3 member A1 [OS=Homo sapiens]	1	BTN3A1	-	28337.5	78670.8	-	21826.9	25692.3
O00483	High	Cytochrome c oxidase subunit NDUFA4 [OS=Homo sapiens]	4	NDUFA4	1.60367e+07	7.2975e+06	6.57277e+06	6.84433e+06	5.6209e+06	2.14653e+06
O00501	High	Claudin-5 [OS=Homo sapiens]	4	CLDN5	1.07314e+06	1.39132e+06	1.64593e+06	458007	1.07166e+06	537526
O00519	High	Fatty-acid amide hydrolase 1 [OS=Homo sapiens]	9	FAAH	602415	459231	357444	257106	353722	116734
O00571	High	ATP-dependent RNA helicase DDX3X [OS=Homo sapiens]	6	DDX3X	175258	234467	259186	74798.8	180598	84644.7
O14494	High	Phospholipid phosphatase 1 [OS=Homo sapiens]	5	PPAP2A; PLPP1	2.34202e+06	3.65555e+06	2.66618e+06	999558	2.81568e+06	870721
O14495	High	Phospholipid phosphatase 3 [OS=Homo sapiens]	9	PPAP2B; PLPP3	2.0303e+06	6.05401e+06	1.98297e+06	866519	4.66309e+06	647598
O14561	High	Acyl carrier protein, mitochondrial [OS=Homo sapiens]	3	NDUFAB1	681533	374254	252903	290873	288269	82592.9
O14569	High	Cytochrome b561 domain-containing protein 2 OS=Homo sapiens GN=CYB561D2 PE=1 SV=1	1	CYB561D2	39602.8	97428.1	-	16902.2	75044	-
O14672	High	Disintegrin and metalloproteinase domain-containing protein 10 [OS=Homo sapiens]	14	ADAM10	4.31031e+06	4.77193e+06	5.6515e+06	1.83961e+06	3.67557e+06	1.84567e+06
O14745	High	Na(+)/H(+) exchange regulatory cofactor NHE-RF1 [OS=Homo sapiens]	10	SLC9A3R1	1.54543e+06	6.70224e+06	3.04185e+06	659578	5.1624e+06	993408
O14828	High	Secretory carrier-associated membrane protein 3 [OS=Homo sapiens]	5	SCAMP3	88296.2	739137	135413	37684.2	569320	44223.1
O14874	High	[3-methyl-2-oxobutanoate dehydrogenase [lipoamide]] kinase, mitochondrial [OS=Homo sapiens]	5	BCKDK	259191	374902	211686	110621	288768	69132.2
O14880	High	Microsomal glutathione S-transferase 3 [OS=Homo sapiens]	5	MGST3	1.47379e+07	8.90879e+06	6.96908e+06	6.29004e+06	6.86199e+06	2.27596e+06
O14925	High	Mitochondrial import inner membrane translocase subunit tim23 [OS=Homo sapiens]	3	TIMM23	318510	351352	208808	135938	270629	68192.6
O14936	High	peripheral plasma membrane protein CASK [OS=Homo sapiens]	7	CASK	110587	867299	210300	47197.9	668036	68679.8
O14949	High	Cytochrome b-c1 complex subunit 8 [OS=Homo sapiens]	4	UQCRQ	6.31242e+06	3.17161e+06	1.85277e+06	2.69409e+06	2.44293e+06	605078
O14950	High	Myosin regulatory light chain 12B [OS=Homo sapiens]	2	MYL12B; MYL12A	5.94132e+06	2.51875e+06	4.36147e+06	2.53571e+06	1.94006e+06	1.42437e+06
O14957	High	cytochrome b-c1 complex subunit 10 [OS=Homo sapiens]	1	UQCR11	1.43004e+06	690884	544699	610330	532153	177888
O14975	High	very long-chain acyl-CoA synthetase [OS=Homo sapiens]	15	SLC27A2	3.98941e+06	1.89601e+06	1.38793e+06	1.70265e+06	1.4604e+06	453270
O14980	High	Exportin-1 [OS=Homo sapiens]	2	XPO1	187334	47159.4	216204	79952.7	36324.5	70607.9
O15020	High	Spectrin beta chain, non-erythrocytic 2 [OS=Homo sapiens]	8	SPTBN2	366822	236590	63005.1	156557	182233	20576.2
O15031	High	Plexin-B2 [OS=Homo sapiens]	20	PLXNB2	2.49802e+06	4.92876e+06	3.43813e+06	1.06614e+06	3.79638e+06	1.12282e+06
O15091	High	Mitochondrial ribonuclease P protein 3 [OS=Homo sapiens]	1	KIAA0391	55517.1	-	15249.3	23694.3	-	4980.1
O15118	High	Niemann-Pick C1 protein [OS=Homo sapiens]	3	NPC1	314911	185352	246837	134402	142768	80611.8
O15121	High	Sphingolipid delta(4)-desaturase DES1 [OS=Homo sapiens]	2	DEGS1	139086	144821	172858	59360.9	111548	56451.8
O15127	High	Secretory carrier-associated membrane protein 2 [OS=Homo sapiens]	3	SCAMP2	452318	822750	310534	193046	633722	101414
O15143	High	Actin-related protein 2/3 complex subunit 1B [OS=Homo sapiens]	5	ARPC1B	820246	770374	1.02854e+06	350075	593380	335899
O15144	High	Actin-related protein 2/3 complex subunit 2 [OS=Homo sapiens]	9	ARPC2	2.67204e+06	1.71773e+06	3.40855e+06	1.14041e+06	1.32308e+06	1.11316e+06
O15145	High	Actin-related protein 2/3 complex subunit 3 [OS=Homo sapiens]	6	ARPC3	5.15752e+06	3.72101e+06	3.46976e+06	2.20119e+06	2.86611e+06	1.13315e+06
O15162	High	phospholipid scramblase 1 [OS=Homo sapiens]	5	PLSCR1	1.98859e+06	2.86758e+06	3.47166e+06	848717	2.20875e+06	1.13377e+06
O15173	High	Membrane-associated progesterone receptor component 2 [OS=Homo sapiens]	9	PGRMC2	5.37441e+06	7.73237e+06	5.0889e+06	2.29376e+06	5.95585e+06	1.66193e+06
O15230	High	Laminin subunit alpha-5 [OS=Homo sapiens]	56	LAMA5	2.22103e+07	5.13567e+06	2.72432e+07	9.4792e+06	3.95575e+06	8.89707e+06
O15244	High	solute carrier family 22 member 2 [OS=Homo sapiens]	3	SLC22A2	118133	181803	73251.7	50418.4	140034	23922.5
O15254	High	Peroxisomal acyl-coenzyme A oxidase 3 [OS=Homo sapiens]	5	ACOX3	361461	150066	134441	154269	115588	43905.6
O15260-1	High	surfeit locus protein 4 [OS=Homo sapiens]	6	SURF4	4.20164e+06	6.76483e+06	4.2739e+06	1.79323e+06	5.21061e+06	1.39577e+06
O15269	High	serine palmitoyltransferase 1 [OS=Homo sapiens]	7	SPTLC1	1.14683e+06	1.32662e+06	924402	489457	1.02183e+06	301891
O15270	High	Serine palmitoyltransferase 2 [OS=Homo sapiens]	7	SPTLC2	514405	481370	514882	219544	370775	168150
O15371	High	Eukaryotic translation initiation factor 3 subunit D [OS=Homo sapiens]	1	EIF3D	776142	1.01251e+06	836269	331252	779888	273108
O15400	High	Syntaxin-7 [OS=Homo sapiens]	7	STX7	651620	2.10182e+06	464595	278106	1.61892e+06	151727
O15427	High	Monocarboxylate transporter 4 [OS=Homo sapiens]	2	SLC16A3	57513.2	195378	238894	24546.2	150490	78017.8
O15439-1	High	multidrug resistance-associated protein 4 [OS=Homo sapiens]	7	ABCC4	229825	306308	98928.3	98087.5	235933	32308
O15498	High	Synaptobrevin homolog YKT6 [OS=Homo sapiens]	2	YKT6	113116	119262	135375	48277.1	91861.1	44210.7
O15511-1	High	Actin-related protein 2/3 complex subunit 5 [OS=Homo sapiens]	1	ARPC5	345613	297789	626467	147505	229372	204591
O15551	High	Claudin-3 [OS=Homo sapiens]	1	CLDN3	313215	279129	251504	133678	214999	82136.2
O43157	High	Plexin-B1 [OS=Homo sapiens]	6	PLXNB1	81716.1	351210	115837	34875.8	270520	37830
O43175	High	D-3-phosphoglycerate dehydrogenase [OS=Homo sapiens]	6	PHGDH	454581	841997	773892	194012	648548	252737
O43181	High	NADH dehydrogenase [ubiquinone] iron-sulfur protein 4, mitochondrial [OS=Homo sapiens]	2	NDUFS4	301648	101104	57576	128741	77874.9	18803.2
O43264	High	Centromere/kinetochore protein zw10 homolog [OS=Homo sapiens]	3	ZW10	15001.9	90213.3	-	6402.68	69486.8	-
O43272	High	Proline dehydrogenase 1, mitochondrial [OS=Homo sapiens]	9	PRODH	909091	244003	328994	387993	187944	107443
O43278	High	Kunitz-type protease inhibitor 1 [OS=Homo sapiens]	1	SPINT1	-	33548.6	22914.8	-	25840.8	7483.52
O43294-1	High	Transforming growth factor beta-1-induced transcript 1 protein [OS=Homo sapiens]	4	TGFB1I1	1.46767e+06	2.86647e+06	2.46429e+06	626391	2.2079e+06	804787
O43301	High	Heat shock 70 kDa protein 12A [OS=Homo sapiens]	7	HSPA12A	476790	2.41638e+06	1.08037e+06	203490	1.86121e+06	352827
O43399	High	Tumor protein D54 [OS=Homo sapiens]	4	TPD52L2	93298.9	564483	276061	39819.3	434793	90155.9
O43402	High	ER membrane protein complex subunit 8 [OS=Homo sapiens]	1	EMC8	20923.7	39214.2	-	8930.06	30204.7	-
O43488	High	aflatoxin B1 aldehyde reductase member 2 [OS=Homo sapiens]	6	AKR7A2	1.90584e+06	1.5754e+06	2.41547e+06	813399	1.21345e+06	788845
O43493-1	High	Trans-Golgi network integral membrane protein 2 [OS=Homo sapiens]	3	TGOLN2	263201	448492	274023	112332	345451	89490.4
O43567	High	E3 ubiquitin-protein ligase RNF13 [OS=Homo sapiens]	1	RNF13	52591.5	33471.4	42502.1	22445.7	25781.3	13880.3
O43570	High	Carbonic anhydrase 12 [OS=Homo sapiens]	8	CA12	4.56241e+06	4.83534e+06	2.37874e+06	1.9472e+06	3.72442e+06	776847
O43598-1	High	2'-deoxynucleoside 5'-phosphate N-hydrolase 1 [OS=Homo sapiens]	2	C6orf108; DNPH1	647073	244693	1.06115e+06	276166	188474	346549
O43615	High	Mitochondrial import inner membrane translocase subunit TIM44 [OS=Homo sapiens]	11	TIMM44	595445	1.1373e+06	1.02062e+06	254132	876003	333313
O43617-1	High	Trafficking protein particle complex subunit 3 [OS=Homo sapiens]	1	TRAPPC3	55104.1	29472.9	54643.6	23518	22701.5	17845.5
O43674-1	High	NADH dehydrogenase [ubiquinone] 1 beta subcomplex subunit 5, mitochondrial [OS=Homo sapiens]	5	NDUFB5	2.12527e+06	1.17005e+06	561256	907048	901227	183295
O43676	High	NADH dehydrogenase [ubiquinone] 1 beta subcomplex subunit 3 [OS=Homo sapiens]	4	NDUFB3	4.06592e+06	2.13143e+06	1.10682e+06	1.7353e+06	1.64173e+06	361465
O43678	High	NADH dehydrogenase [ubiquinone] 1 alpha subcomplex subunit 2 [OS=Homo sapiens]	3	NDUFA2	2.62411e+06	1.61814e+06	1.06821e+06	1.11995e+06	1.24637e+06	348856
O43707	High	Alpha-actinin-4 [OS=Homo sapiens]	23	ACTN4	2.69681e+08	3.88714e+08	2.54325e+08	1.15098e+08	2.99406e+08	8.30575e+07
O43731-1	High	ER lumen protein-retaining receptor 3 [OS=Homo sapiens]	1	KDELR3	28497.4	39116.9	-	12162.5	30129.8	-
O43760	High	Synaptogyrin-2 [OS=Homo sapiens]	4	SYNGR2	5.44735e+06	5.06764e+06	5.16404e+06	2.32489e+06	3.90334e+06	1.68647e+06
O43772	High	mitochondrial carnitine/acylcarnitine carrier protein [OS=Homo sapiens]	13	SLC25A20	5.93004e+06	5.63576e+06	3.73135e+06	2.5309e+06	4.34094e+06	1.21858e+06
O43776	High	Asparagine--tRNA ligase, cytoplasmic [OS=Homo sapiens]	6	NARS	555719	282959	927308	237177	217949	302840
O43837-1	High	isocitrate dehydrogenase [NAD] subunit beta, mitochondrial [OS=Homo sapiens]	9	IDH3B	1.09842e+06	1.29554e+06	1.22164e+06	468798	997890	398962
O43865	High	S-adenosylhomocysteine hydrolase-like protein 1 [OS=Homo sapiens]	3	AHCYL1	204794	134255	272570	87404.7	103410	89015.7
O43920	High	NADH dehydrogenase [ubiquinone] iron-sulfur protein 5 [OS=Homo sapiens]	6	NDUFS5	1.07023e+07	4.46236e+06	2.86123e+06	4.56765e+06	3.43713e+06	934421
O60220	High	Mitochondrial import inner membrane translocase subunit Tim8 A [OS=Homo sapiens]	1	TIMM8A	75772.7	46569.6	91414.8	32339.2	35870.2	29854.2
O60262	High	guanine nucleotide-binding protein G(I)/G(S)/G(O) subunit gamma-7 [OS=Homo sapiens]	2	GNG7	325604	246729	243650	138965	190043	79571.1
O60271	High	C-jun-amino-terminal kinase-interacting protein 4 [OS=Homo sapiens]	2	SPAG9	13888.9	26452.4	38860.7	5927.7	20375	12691.1
O60306	High	Intron-binding protein aquarius [OS=Homo sapiens]	1	AQR	16724.9	20183.3	-	7138.04	15546.2	-
O60397	Medium	Putative cytochrome c oxidase subunit 7A3, mitochondrial OS=Homo sapiens GN=COX7A2P2 PE=5 SV=1	1	COX7A2P2	69891.4	31638.7	18451	29829.1	24369.7	6025.71
O60449-2	High	Isoform 2 of Lymphocyte antigen 75 [OS=Homo sapiens]	5	LY75-CD302; LY75; CD302	292934	386728	381704	125022	297877	124657
O60487	High	Myelin protein zero-like protein 2 [OS=Homo sapiens]	1	MPZL2	111540	89904.9	84511.4	47604.6	69249.2	27599.7
O60493-1	High	sorting nexin-3 [OS=Homo sapiens]	3	SNX3	27521.5	153876	52489	11746	118523	17141.8
O60494	High	cubilin [OS=Homo sapiens]	61	CUBN	2.06392e+07	1.42796e+07	5.54573e+06	8.80864e+06	1.09989e+07	1.81112e+06
O60500	High	Nephrin [OS=Homo sapiens]	25	NPHS1	8.97072e+06	1.07403e+07	1.19381e+07	3.82863e+06	8.27272e+06	3.89875e+06
O60518	High	ran-binding protein 6 [OS=Homo sapiens]	1	RANBP6	154285	167115	338308	65847.6	128721	110485
O60568	High	Procollagen-lysine,2-oxoglutarate 5-dioxygenase 3 [OS=Homo sapiens]	9	PLOD3	428360	505857	477865	182821	389636	156061
O60635	High	Tetraspanin-1 [OS=Homo sapiens]	1	TSPAN1	361594	137506	245128	154326	105914	80053.9
O60637	High	Tetraspanin-3 [OS=Homo sapiens]	1	TSPAN3	90756	66739.9	78822.9	38734	51406.3	25742
O60656-1	High	UDP-glucuronosyltransferase 1-9 [OS=Homo sapiens]	9	UGT1A9	1.3573e+07	2.74969e+07	6.77597e+06	5.79284e+06	2.11795e+07	2.21289e+06
O60701	High	UDP-glucose 6-dehydrogenase [OS=Homo sapiens]	9	UGDH	1.09052e+06	274194	1.07288e+06	465427	211198	350380
O60725	High	protein-s-isoprenylcysteine O-methyltransferase [OS=Homo sapiens]	2	ICMT	143724	117826	62131.6	61340.2	90755.2	20290.9
O60783	High	28S ribosomal protein S14, mitochondrial [OS=Homo sapiens]	1	MRPS14	66911.9	78273	-	28557.5	60289.8	-
O60831	High	PRA1 family protein 2 [OS=Homo sapiens]	3	PRAF2	481165	1.48787e+06	914422	205358	1.14603e+06	298632
O60884	High	DnaJ homolog subfamily A member 2 [OS=Homo sapiens]	3	DNAJA2	135313	254432	197917	57750.5	195976	64635.6
O60888-1	High	Protein CutA [OS=Homo sapiens]	2	CUTA	76286.6	43475.5	119033	32558.6	33487	38873.7
O75027-1	High	ATP-binding cassette sub-family B member 7, mitochondrial [OS=Homo sapiens]	9	ABCB7	1.12907e+06	727869	471187	481880	560641	153880
O75054	High	Immunoglobulin superfamily member 3 [OS=Homo sapiens]	1	IGSF3	36483.1	43034.8	27251.2	15570.7	33147.5	8899.7
O75063	High	Glycosaminoglycan xylosylkinase [OS=Homo sapiens]	1	FAM20B	93036.9	81601.1	72227.3	39707.5	62853.2	23588
O75131	High	Copine-3 [OS=Homo sapiens]	10	CPNE3	920052	738724	866314	392672	569002	282921
O75155-1	High	Cullin-associated NEDD8-dissociated protein 2 [OS=Homo sapiens]	1	CAND2	507194	442425	796400	216467	340777	260088
O75165	High	DnaJ homolog subfamily C member 13 [OS=Homo sapiens]	16	DNAJC13	637544	736594	474830	272099	567361	155070
O75208-1	High	Ubiquinone biosynthesis protein COQ9, mitochondrial [OS=Homo sapiens]	4	COQ9	836163	422969	438269	356868	325791	143130
O75223-1	High	gamma-glutamylcyclotransferase [OS=Homo sapiens]	3	GGCT	311376	166160	436786	132893	127985	142645
O75251	High	NADH dehydrogenase [ubiquinone] iron-sulfur protein 7, mitochondrial [OS=Homo sapiens]	6	NDUFS7	8.92221e+06	4.4824e+06	3.03639e+06	3.80793e+06	3.45257e+06	991623
O75306-1	High	NADH dehydrogenase [ubiquinone] iron-sulfur protein 2, mitochondrial [OS=Homo sapiens]	21	NDUFS2	2.7046e+07	1.85504e+07	1.21196e+07	1.1543e+07	1.42884e+07	3.958e+06
O75309-1	High	Cadherin-16 [OS=Homo sapiens]	19	CDH16	2.41449e+06	1.18658e+07	1.88732e+06	1.03049e+06	9.13959e+06	616362
O75323-1	High	Protein NipSnap homolog 2 [OS=Homo sapiens]	7	GBAS; NIPSNAP2	2.56343e+06	2.13743e+06	2.38014e+06	1.09405e+06	1.64635e+06	777306
O75340	High	programmed cell death protein 6 [OS=Homo sapiens]	7	PDCD6	1.8423e+06	2.49355e+06	1.8e+06	786279	1.92065e+06	587844
O75342	High	Arachidonate 12-lipoxygenase, 12R-type [OS=Homo sapiens]	1	ALOX12B	66784	55719.2	110435	28502.9	42917.7	36065.8
O75348	High	V-type proton ATPase subunit G 1 [OS=Homo sapiens]	2	ATP6V1G1	606773	388398	309597	258966	299163	101108
O75356	High	Ectonucleoside triphosphate diphosphohydrolase 5 [OS=Homo sapiens]	9	ENTPD5	1.97642e+06	1.434e+06	788336	843523	1.10453e+06	257455
O75367-1	High	Core histone macro-H2A.1 [OS=Homo sapiens]	7	H2AFY	920563	1.41959e+06	578982	392890	1.09344e+06	189084
O75368	High	SH3 domain-binding glutamic acid-rich-like protein [OS=Homo sapiens]	2	SH3BGRL	124760	55093.6	87535.1	53246.5	42435.8	28587.2
O75379-1	High	Vesicle-associated membrane protein 4 [OS=Homo sapiens]	1	VAMP4	22709.4	41523.9	-	9692.19	31983.7	-
O75380	High	NADH dehydrogenase [ubiquinone] iron-sulfur protein 6, mitochondrial [OS=Homo sapiens]	4	NDUFS6	1.72339e+06	672282	452245	735530	517825	147694
O75381-1	High	Peroxisomal membrane protein PEX14 [OS=Homo sapiens]	4	PEX14	109204	105125	56334.8	46607.5	80972.4	18397.8
O75390	High	citrate synthase, mitochondrial [OS=Homo sapiens]	11	CS	9.3612e+06	1.08928e+07	1.27974e+07	3.99529e+06	8.39014e+06	4.17937e+06
O75396	High	Vesicle-trafficking protein SEC22b [OS=Homo sapiens]	8	SEC22B	730754	3.22471e+06	923012	311880	2.48383e+06	301437
O75438	High	NADH dehydrogenase [ubiquinone] 1 beta subcomplex subunit 1 [OS=Homo sapiens]	3	NDUFB1	2.05068e+06	963684	733715	875215	742277	239616
O75489	High	NADH dehydrogenase [ubiquinone] iron-sulfur protein 3, mitochondrial [OS=Homo sapiens]	11	NDUFS3	2.06995e+07	1.09569e+07	8.70999e+06	8.8344e+06	8.43958e+06	2.84451e+06
O75531	High	Barrier-to-autointegration factor [OS=Homo sapiens]	1	BANF1	54763.5	-	58889.4	23372.7	-	19232.1
O75533-1	High	splicing factor 3B subunit 1 [OS=Homo sapiens]	12	SF3B1	451228	861082	383021	192581	663248	125087
O75694	High	nuclear pore complex protein nup155 [OS=Homo sapiens]	12	NUP155	184260	1.41091e+06	464022	78640.9	1.08675e+06	151540
O75844	High	caax prenyl protease 1 homolog [OS=Homo sapiens]	10	ZMPSTE24	2.14095e+06	2.60205e+06	2.00781e+06	913741	2.00423e+06	655711
O75874	High	Isocitrate dehydrogenase [NADP] cytoplasmic [OS=Homo sapiens]	16	IDH1	5.87396e+06	4.08296e+06	8.66428e+06	2.50696e+06	3.1449e+06	2.82958e+06
O75881	High	25-hydroxycholesterol 7-alpha-hydroxylase [OS=Homo sapiens]	3	CYP7B1	305948	108840	277902	130576	83833.6	90757.2
O75891-1	High	Cytosolic 10-formyltetrahydrofolate dehydrogenase [OS=Homo sapiens]	22	ALDH1L1	8.17962e+06	2.12404e+06	7.14196e+06	3.491e+06	1.63604e+06	2.33242e+06
O75923-1	High	dysferlin [OS=Homo sapiens]	1	DYSF	436436	394621	470499	186268	303957	153656
O75923-13	High	Isoform 13 of Dysferlin [OS=Homo sapiens]	2	DYSF	3.02035e+07	5.39069e+07	4.01558e+07	1.28906e+07	4.15218e+07	1.31141e+07
O75936	High	gamma-butyrobetaine dioxygenase [OS=Homo sapiens]	8	BBOX1	1.50264e+06	725588	2.7217e+06	641317	558884	888853
O75947-1	High	ATP synthase subunit d, mitochondrial [OS=Homo sapiens]	12	ATP5H	3.08827e+07	1.59606e+07	1.50924e+07	1.31805e+07	1.22937e+07	4.92889e+06
O75954	High	tetraspanin-9 [OS=Homo sapiens]	7	TSPAN9	1.26714e+07	1.35162e+07	1.23048e+07	5.40805e+06	1.04108e+07	4.01851e+06
O75964	High	ATP synthase subunit g, mitochondrial [OS=Homo sapiens]	4	ATP5L	2.36559e+07	1.3779e+07	9.75011e+06	1.00961e+07	1.06132e+07	3.18419e+06
O75976	High	Carboxypeptidase D [OS=Homo sapiens]	8	CPD	306047	285927	398952	130618	220235	130290
O76003	Medium	glutaredoxin-3 [OS=Homo sapiens]	1	GLRX3	290690	238839	126077	124064	183965	41174.1
O76021	High	Ribosomal L1 domain-containing protein 1 [OS=Homo sapiens]	2	RSL1D1	-	19463.5	27882.3	-	14991.8	9105.8
O76024	High	Wolframin [OS=Homo sapiens]	9	WFS1	560927	1.09058e+06	424486	239400	840022	138629
O76062	High	Delta(14)-sterol reductase [OS=Homo sapiens]	4	TM7SF2	271861	258618	229122	116028	199200	74826.5
O76095-1	High	Protein JTB [OS=Homo sapiens]	1	JTB	80797.5	48456.4	55910.8	34483.8	37323.5	18259.3
O94760-1	High	N(G),N(G)-dimethylarginine dimethylaminohydrolase 1 [OS=Homo sapiens]	10	DDAH1	2.32136e+06	1.11852e+06	3.74324e+06	990739	861541	1.22247e+06
O94826	High	Mitochondrial import receptor subunit TOM70 [OS=Homo sapiens]	23	TOMM70A; TOMM70	572261	7.28824e+06	838290	244237	5.61376e+06	273768
O94856	High	Neurofascin [OS=Homo sapiens]	8	NFASC	647947	1.51548e+06	1.02998e+06	276539	1.1673e+06	336372
O94874-1	High	E3 UFM1-protein ligase 1 [OS=Homo sapiens]	16	UFL1	743794	1.33428e+06	864549	317446	1.02773e+06	282344
O94903	High	Pyridoxal phosphate homeostasis protein [OS=Homo sapiens]	5	PROSC; PLPBP	239831	190055	503570	102358	146390	164456
O94905-1	High	Erlin-2 [OS=Homo sapiens]	14	ERLIN2	8.38777e+06	8.47776e+06	5.33863e+06	3.57984e+06	6.52999e+06	1.74349e+06
O94906-1	High	Pre-mRNA-processing factor 6 [OS=Homo sapiens]	9	PRPF6	33051.7	552165	74190.4	14106.2	425304	24229.1
O94919	High	endonuclease domain-containing 1 protein [OS=Homo sapiens]	14	ENDOD1	3.29574e+06	5.90026e+06	3.82644e+06	1.4066e+06	4.54468e+06	1.24964e+06
O94925-1	High	Glutaminase kidney isoform, mitochondrial [OS=Homo sapiens]	3	GLS	4.50114e+06	4.93607e+06	4.71138e+06	1.92105e+06	3.80201e+06	1.53864e+06
O94925-3	High	Isoform 3 of Glutaminase kidney isoform, mitochondrial [OS=Homo sapiens]	1	GLS	30822.2	72755.5	86277.8	13154.7	56039.9	28176.6
O95070	High	protein YIF1A [OS=Homo sapiens]	3	YIF1A	271521	404625	306113	115883	311662	99970.4
O95101	High	Cytochrome c oxidase subunit 6A, mitochondrial [OS=Homo sapiens]	1	COX6A1	95762	83836.9	-	40870.5	64575.3	-
O95139	High	NADH dehydrogenase [ubiquinone] 1 beta subcomplex subunit 6 [OS=Homo sapiens]	5	NDUFB6	1.89101e+06	1.07377e+06	617197	807067	827071	201564
O95140	High	Mitofusin-2 [OS=Homo sapiens]	7	MFN2	116121	465764	61582.5	49559.6	358754	20111.6
O95154	High	Aflatoxin B1 aldehyde reductase member 3 [OS=Homo sapiens]	6	AKR7A3	789452	522093	1.36345e+06	336932	402142	445274
O95167	High	NADH dehydrogenase [ubiquinone] 1 alpha subcomplex subunit 3 [OS=Homo sapiens]	2	NDUFA3	2.12826e+06	1.16817e+06	773464	908324	899784	252598
O95168-1	High	NADH dehydrogenase [ubiquinone] 1 beta subcomplex subunit 4 [OS=Homo sapiens]	4	NDUFB4	5.23445e+06	3.46929e+06	1.57431e+06	2.23402e+06	2.67222e+06	514136
O95169	High	NADH dehydrogenase [ubiquinone] 1 beta subcomplex subunit 8, mitochondrial [OS=Homo sapiens]	6	NDUFB8	3.53476e+06	2.89468e+06	1.45498e+06	1.50861e+06	2.22963e+06	475167
O95183	High	vesicle-associated membrane protein 5 [OS=Homo sapiens]	2	VAMP5	497939	1.06708e+06	901808	212517	821921	294512
O95197-3	High	Isoform 3 of Reticulon-3 [OS=Homo sapiens]	5	RTN3	4.57345e+06	4.6229e+06	3.44323e+06	1.95191e+06	3.56078e+06	1.12449e+06
O95202-1	High	mitochondrial proton/calcium exchanger protein [OS=Homo sapiens]	21	LETM1	4.86085e+06	7.09993e+06	3.37018e+06	2.07457e+06	5.46872e+06	1.10063e+06
O95255-1	High	multidrug resistance-associated protein 6 [OS=Homo sapiens]	1	ABCC6	21629.5	46929.2	34535	9231.33	36147.2	11278.4
O95292	High	Vesicle-associated membrane protein-associated protein B/C [OS=Homo sapiens]	7	VAPB	50032.6	1.30957e+06	86775.8	21353.6	1.0087e+06	28339.2
O95295	High	SNARE-associated protein Snapin [OS=Homo sapiens]	1	SNAPIN	40943.4	103837	48885.1	17474.4	79980.5	15964.9
O95297-1	High	Myelin protein zero-like protein 1 [OS=Homo sapiens]	2	MPZL1	142203	178974	226984	60691.4	137854	74128.2
O95298-1	High	NADH dehydrogenase [ubiquinone] 1 subunit C2 [OS=Homo sapiens]	6	NDUFC2; NDUFC2-KCTD14	6.47915e+06	3.88929e+06	1.99566e+06	2.76525e+06	2.99572e+06	651743
O95299	High	NADH dehydrogenase [ubiquinone] 1 alpha subcomplex subunit 10, mitochondrial [OS=Homo sapiens]	15	NDUFA10	1.65595e+07	1.12772e+07	7.50183e+06	7.06748e+06	8.68624e+06	2.44995e+06
O95302	High	Peptidyl-prolyl cis-trans isomerase FKBP9 [OS=Homo sapiens]	7	FKBP9	741387	987547	797117	316419	760658	260322
O95342	High	Bile salt export pump [OS=Homo sapiens]	1	ABCB11	120834	79587.6	52788.1	51571.2	61302.3	17239.5
O95373	High	Importin-7 [OS=Homo sapiens]	2	IPO7	70848.5	28382	82966.7	30237.6	21861.2	27095.2
O95470	High	sphingosine-1-phosphate lyase 1 [OS=Homo sapiens]	3	SGPL1	119400	129263	92468.7	50958.8	99564.7	30198.4
O95479	High	GDH/6PGL endoplasmic bifunctional protein [OS=Homo sapiens]	4	H6PD	240121	336246	302606	102482	258993	98825
O95490-1	High	Adhesion G protein-coupled receptor L2 [OS=Homo sapiens]	13	LPHN2; ADGRL2	932219	857531	1.2346e+06	397864	660513	403195
O95721	High	Synaptosomal-associated protein 29 [OS=Homo sapiens]	5	SNAP29	415048	372000	509509	177139	286533	166395
O95782	High	AP-2 complex subunit alpha-1 [OS=Homo sapiens]	17	AP2A1	2.54827e+06	7.31283e+06	3.65379e+06	1.08758e+06	5.6327e+06	1.19325e+06
O95807	High	transmembrane protein 50A [OS=Homo sapiens]	2	TMEM50A	133152	122949	47370.2	56828.4	94701.2	15470.1
O95810	High	caveolae-associated protein 2 [OS=Homo sapiens]	2	SDPR; CAVIN2	47787.6	149504	128667	20395.4	115155	42020.1
O95822	High	Malonyl-CoA decarboxylase, mitochondrial [OS=Homo sapiens]	11	MLYCD	591334	572085	487390	252377	440648	159172
O95831-1	High	Apoptosis-inducing factor 1, mitochondrial [OS=Homo sapiens]	30	AIFM1	3.8797e+07	4.72774e+07	2.45984e+07	1.65583e+07	3.64154e+07	8.03335e+06
O95858	High	Tetraspanin-15 [OS=Homo sapiens]	1	TSPAN15	57480.4	68871.1	-	24532.2	53047.9	-
O95861-1	High	3'(2'),5'-bisphosphate nucleotidase 1 [OS=Homo sapiens]	4	BPNT1	359393	193373	553866	153386	148945	180881
O95881	Medium	Thioredoxin domain-containing protein 12 [OS=Homo sapiens]	1	TXNDC12	68322.3	110853	137972	29159.4	85384.2	45058.8
O95954-1	High	formimidoyltransferase-cyclodeaminase [OS=Homo sapiens]	27	FTCD	5.94303e+06	1.13283e+07	9.67697e+06	2.53644e+06	8.72558e+06	3.1603e+06
O95969	High	Secretoglobin family 1D member 2 [OS=Homo sapiens]	1	SCGB1D2	32305.6	42689.2	64224.3	13787.8	32881.3	20974.3
O95980	High	Reversion-inducing cysteine-rich protein with Kazal motifs [OS=Homo sapiens]	2	RECK	9983.2	95948	16115	4260.76	73903.9	5262.84
O95996-1	High	adenomatous polyposis coli protein 2 [OS=Homo sapiens]	1	APC2	470181	701542	545295	200670	540362	178082
O96000	High	NADH dehydrogenase [ubiquinone] 1 beta subcomplex subunit 10 [OS=Homo sapiens]	11	NDUFB10	1.76035e+07	1.15075e+07	7.08349e+06	7.51304e+06	8.86363e+06	2.31332e+06
O96005-1	High	Cleft lip and palate transmembrane protein 1 [OS=Homo sapiens]	9	CLPTM1	1.56237e+06	904569	683105	666807	696744	223088
O96008	High	Mitochondrial import receptor subunit TOM40 homolog [OS=Homo sapiens]	7	TOMM40	1.88345e+06	1.46146e+06	820080	803842	1.12569e+06	267821
O96009	High	Napsin-A [OS=Homo sapiens]	5	NAPSA	2.4483e+06	1.18094e+06	784627	1.04492e+06	909617	256243
O96011-1	High	Peroxisomal membrane protein 11B [OS=Homo sapiens]	7	LOC101060567; PEX11B	943424	726155	741888	402646	559320	242286
P00167-1	High	Cytochrome b5 [OS=Homo sapiens]	5	CYB5A	6.52679e+06	2.54028e+07	7.27022e+06	2.78559e+06	1.95665e+07	2.37431e+06
P00338-1	High	L-lactate dehydrogenase A chain [OS=Homo sapiens]	14	LDHA	1.16823e+07	2.55007e+06	1.41516e+07	4.98593e+06	1.96419e+06	4.62163e+06
P00352	High	Retinal dehydrogenase 1 [OS=Homo sapiens]	18	ALDH1A1	1.17526e+07	4.14152e+06	1.39033e+07	5.0159e+06	3.19e+06	4.54053e+06
P00367	High	Glutamate dehydrogenase 1, mitochondrial [OS=Homo sapiens]	11	GLUD1	5.7801e+07	6.75047e+07	5.91145e+07	2.4669e+07	5.19954e+07	1.93056e+07
P00390	High	Glutathione reductase, mitochondrial [OS=Homo sapiens]	9	GSR	2.52173e+06	1.21583e+06	2.86175e+06	1.07626e+06	936489	934589
P00441	High	Superoxide dismutase [Cu-Zn] [OS=Homo sapiens]	3	SOD1	1.29617e+06	662442	2.65844e+06	553194	510246	868194
P00492	High	Hypoxanthine-guanine phosphoribosyltransferase [OS=Homo sapiens]	4	HPRT1	350452	144083	494279	149570	110979	161421
P00558	High	phosphoglycerate kinase 1 [OS=Homo sapiens]	23	PGK1	1.75621e+07	8.27038e+06	3.12156e+07	7.49538e+06	6.37026e+06	1.01944e+07
P00738	High	Haptoglobin [OS=Homo sapiens]	6	HP	353620	405620	114341	150922	312429	37341.4
P00918	High	Carbonic anhydrase 2 [OS=Homo sapiens]	9	CA2	1.06898e+07	3.29738e+06	1.11722e+07	4.56233e+06	2.53981e+06	3.64862e+06
P00966	High	Argininosuccinate synthase [OS=Homo sapiens]	22	ASS1	3.2952e+07	1.30501e+07	4.35782e+07	1.40637e+07	1.00518e+07	1.42318e+07
P01008	High	Antithrombin-III [OS=Homo sapiens]	6	SERPINC1	264835	141518	236940	113030	109004	77379.8
P01009-1	High	alpha-1-antitrypsin [OS=Homo sapiens]	17	SERPINA1	4.18633e+06	3.55012e+06	5.11374e+06	1.78669e+06	2.73448e+06	1.67004e+06
P01011-1	High	Alpha-1-antichymotrypsin [OS=Homo sapiens]	6	SERPINA3	795825	321283	605636	339652	247468	197788
P01023	High	alpha-2-macroglobulin [OS=Homo sapiens]	23	A2M	2.55756e+06	2.00204e+06	3.88939e+06	1.09155e+06	1.54207e+06	1.27019e+06
P01024	High	Complement C3 [OS=Homo sapiens]	26	C3	3.01917e+06	3.55908e+06	3.95754e+06	1.28856e+06	2.74138e+06	1.29245e+06
P01031	High	Complement C5 [OS=Homo sapiens]	9	C5	529023	336918	252686	225783	259511	82522.2
P01036	High	Cystatin-S [OS=Homo sapiens]	1	CST4	32014.7	17162.4	26324.4	13663.6	13219.3	8597.01
P01040	High	Cystatin-A [OS=Homo sapiens]	3	CSTA	108994	85726.9	175427	46517.8	66031.1	57290.9
P01112	High	GTPase HRas [OS=Homo sapiens]	4	HRAS	391498	522054	649670	167088	402112	212169
P01833	High	Polymeric immunoglobulin receptor [OS=Homo sapiens]	19	PIGR	970814	864675	957454	414336	666015	312685
P02452	High	Collagen alpha-1(I) chain [OS=Homo sapiens]	3	COL1A1	104332	198447	308692	44528	152853	100812
P02462	High	Collagen alpha-1(IV) chain [OS=Homo sapiens]	9	COL4A1	2.46172e+06	1.61264e+06	3.18435e+06	1.05064e+06	1.24213e+06	1.03995e+06
P02489	High	Alpha-crystallin A chain [OS=Homo sapiens]	5	CRYAA; LOC102724652; CRYAA2	566842	529385	707563	241924	407758	231076
P02533	High	Keratin, type I cytoskeletal 14 [OS=Homo sapiens]	11	KRT14	2.02085e+07	1.78228e+07	2.86717e+07	8.62483e+06	1.3728e+07	9.36359e+06
P02538	High	Keratin, type II cytoskeletal 6A [OS=Homo sapiens]	3	KRT6A	1.70169e+07	1.52108e+07	2.48668e+07	7.2627e+06	1.17161e+07	8.121e+06
P02545	High	Prelamin-A/C [OS=Homo sapiens]	42	LMNA	1.55213e+07	1.38208e+08	5.95307e+07	6.62439e+06	1.06455e+08	1.94415e+07
P02647	High	Apolipoprotein A-I [OS=Homo sapiens]	14	APOA1	6.1673e+06	1.14993e+07	4.94377e+06	2.63216e+06	8.8573e+06	1.61453e+06
P02649	High	Apolipoprotein E [OS=Homo sapiens]	21	APOE	2.09087e+07	2.26754e+07	1.16346e+07	8.92368e+06	1.74657e+07	3.79962e+06
P02654	High	Apolipoprotein C-I [OS=Homo sapiens]	4	APOC1	1.22802e+06	1.11459e+06	805172	524109	858509	262953
P02656	High	Apolipoprotein C-III [OS=Homo sapiens]	1	APOC3	53243.6	244548	21948.6	22724	188363	7167.95
P02671-1	High	Fibrinogen alpha chain [OS=Homo sapiens]	7	FGA	108611	283539	385472	46354.5	218396	125887
P02675	High	Fibrinogen beta chain [OS=Homo sapiens]	12	FGB	355165	566972	1.17909e+06	151582	436710	385065
P02741-1	High	C-reactive protein [OS=Homo sapiens]	3	CRP	130342	151719	360412	55629	116861	117703
P02743	High	Serum amyloid P-component [OS=Homo sapiens]	5	APCS	935097	906739	726200	399092	698415	237162
P02747	High	Complement C1q subcomponent subunit C [OS=Homo sapiens]	2	C1QC	-	98423.6	67677.9	-	75810.7	22102.2
P02760	High	Protein AMBP [OS=Homo sapiens]	8	AMBP	573773	524602	718838	244882	404074	234758
P02763	High	Alpha-1-acid glycoprotein 1 [OS=Homo sapiens]	5	ORM1	625768	372194	869227	267073	286682	283872
P02766	High	Transthyretin [OS=Homo sapiens]	5	TTR	2.12597e+06	288116	631919	907349	221921	206372
P02768-1	High	Serum albumin [OS=Homo sapiens]	50	ALB	9.22193e+07	6.25387e+07	5.49788e+07	3.93585e+07	4.81704e+07	1.79549e+07
P02790	High	Hemopexin [OS=Homo sapiens]	4	HPX	189198	360094	19112.4	80748.1	277362	6241.73
P02792	High	Ferritin light chain [OS=Homo sapiens]	8	FTL	7.60854e+06	3.52773e+06	7.41708e+06	3.24727e+06	2.71723e+06	2.42227e+06
P04003	High	C4b-binding protein alpha chain [OS=Homo sapiens]	3	C4BPA	101001	248497	198629	43106.3	191405	64868.3
P04004	High	Vitronectin [OS=Homo sapiens]	6	VTN	3.0256e+06	4.47655e+06	2.88479e+06	1.2913e+06	3.44806e+06	942113
P04040	High	catalase [OS=Homo sapiens]	23	CAT	1.49758e+07	1.65069e+07	1.89509e+07	6.39156e+06	1.27144e+07	6.18899e+06
P04062	High	glucosylceramidase [OS=Homo sapiens]	5	GBA	747350	542217	718507	318963	417642	234650
P04066	High	tissue alpha-L-fucosidase [OS=Homo sapiens]	2	FUCA1	150110	172928	279480	64065.9	133198	91272.4
P04075	High	fructose-bisphosphate aldolase A [OS=Homo sapiens]	14	ALDOA	1.40291e+07	5.18078e+06	2.40578e+07	5.98751e+06	3.9905e+06	7.85677e+06
P04080	High	Cystatin-B [OS=Homo sapiens]	1	CSTB	252236	93627.6	358677	107653	72116.6	117137
P04083	High	annexin A1 [OS=Homo sapiens]	16	ANXA1	1.65557e+06	2.09199e+06	2.45082e+06	706584	1.61136e+06	800389
P04181-1	High	Ornithine aminotransferase, mitochondrial [OS=Homo sapiens]	6	OAT	360781	415264	538645	153979	319857	175911
P04196	High	Histidine-rich glycoprotein [OS=Homo sapiens]	4	HRG	36022.7	422100	12731.3	15374.2	325122	4157.78
P04217	High	Alpha-1B-glycoprotein [OS=Homo sapiens]	4	A1BG	31885.6	116232	27300.9	13608.5	89527.6	8915.91
P04259	High	keratin, type II cytoskeletal 6B [OS=Homo sapiens]	4	KRT6B	1.6952e+06	1.6112e+06	2.97415e+06	723499	1.24103e+06	971298
P04350	High	Tubulin beta-4A chain [OS=Homo sapiens]	1	TUBB4A	1.16928e+06	1.26955e+06	1.31191e+06	499039	977867	428443
P04406-1	High	glyceraldehyde-3-phosphate dehydrogenase [OS=Homo sapiens]	15	GAPDH	5.93836e+07	2.24131e+07	7.4516e+07	2.53445e+07	1.72637e+07	2.43354e+07
P04632	High	Calpain small subunit 1 [OS=Homo sapiens]	9	CAPNS1	2.53737e+06	1.69413e+06	3.22412e+06	1.08293e+06	1.3049e+06	1.05293e+06
P04792	High	Heat shock protein beta-1 [OS=Homo sapiens]	14	HSPB1	4.0415e+06	2.13361e+07	1.21768e+07	1.72488e+06	1.64341e+07	3.9767e+06
P04839	High	Cytochrome b-245 heavy chain [OS=Homo sapiens]	3	CYBB	13627.2	32530	-	5815.98	25056.2	-
P04843	High	Dolichyl-diphosphooligosaccharide--protein glycosyltransferase subunit 1 [OS=Homo sapiens]	27	RPN1	3.14905e+07	3.63055e+07	2.39408e+07	1.34399e+07	2.79643e+07	7.81859e+06
P04844-1	High	Dolichyl-diphosphooligosaccharide--protein glycosyltransferase subunit 2 [OS=Homo sapiens]	21	RPN2	1.26436e+07	1.60296e+07	1.17925e+07	5.39617e+06	1.23468e+07	3.85119e+06
P04899-1	High	guanine nucleotide-binding protein G(i) subunit alpha-2 [OS=Homo sapiens]	10	GNAI2	1.54139e+07	2.24349e+07	2.28324e+07	6.57853e+06	1.72805e+07	7.45658e+06
P04921-1	High	Glycophorin-C [OS=Homo sapiens]	1	GYPC	21310.6	165197	95794.4	9095.21	127243	31284.5
P05023	High	Sodium/potassium-transporting ATPase subunit alpha-1 [OS=Homo sapiens]	33	ATP1A1	3.31488e+08	2.60058e+08	1.45667e+08	1.41477e+08	2.0031e+08	4.75719e+07
P05026	High	Sodium/potassium-transporting ATPase subunit beta-1 [OS=Homo sapiens]	13	ATP1B1	5.19975e+07	5.59108e+07	2.37158e+07	2.21921e+07	4.30653e+07	7.74509e+06
P05062	High	fructose-bisphosphate aldolase B [OS=Homo sapiens]	14	ALDOB	5.98472e+07	2.52286e+07	8.65433e+07	2.55423e+07	1.94323e+07	2.82633e+07
P05089	High	Arginase-1 [OS=Homo sapiens]	10	ARG1	939147	923229	1.5195e+06	400821	711116	496237
P05106	High	Integrin beta-3 [OS=Homo sapiens]	2	ITGB3	4.09039e+06	3.92767e+06	3.93517e+06	1.74575e+06	3.02529e+06	1.28515e+06
P05109	High	Protein S100-A8 [OS=Homo sapiens]	5	S100A8	2.89175e+06	1.8263e+06	3.18536e+06	1.23418e+06	1.40671e+06	1.04027e+06
P05141	High	ADP/ATP translocase 2 [OS=Homo sapiens]	6	SLC25A5	2.6146e+08	1.69108e+08	1.32987e+08	1.11589e+08	1.30255e+08	4.34309e+07
P05156	High	Complement factor I [OS=Homo sapiens]	3	CFI	92667.7	116218	67331	39549.9	89516.8	21988.9
P05164	High	Myeloperoxidase [OS=Homo sapiens]	4	MPO	20526.3	49481.9	50549.3	8760.49	38113.4	16508.4
P05165-1	High	Propionyl-CoA carboxylase alpha chain, mitochondrial [OS=Homo sapiens]	32	PCCA	1.84864e+07	1.00285e+07	7.01695e+06	7.88984e+06	7.72444e+06	2.29159e+06
P05166-1	High	propionyl-CoA carboxylase beta chain, mitochondrial [OS=Homo sapiens]	24	PCCB	1.33021e+07	8.44442e+06	5.48256e+06	5.67722e+06	6.50431e+06	1.79049e+06
P05198	High	Eukaryotic translation initiation factor 2 subunit 1 [OS=Homo sapiens]	1	EIF2S1	135425	78011.4	176085	57798.2	60088.2	57505.8
P05362	High	Intercellular adhesion molecule 1 [OS=Homo sapiens]	2	ICAM1	8.8374e+06	6.98888e+06	1.1542e+07	3.77173e+06	5.38318e+06	3.76939e+06
P05387	High	60S acidic ribosomal protein P2 [OS=Homo sapiens]	3	RPLP2	130849	366325	352259	55845.2	282162	115041
P05388	High	60S acidic ribosomal protein P0 [OS=Homo sapiens]	8	RPLP0	3.4487e+06	2.22937e+06	4.6214e+06	1.47188e+06	1.71717e+06	1.50926e+06
P05413	High	Fatty acid-binding protein, heart [OS=Homo sapiens]	4	FABP3	1.47275e+06	329305	1.36657e+06	628557	253647	446293
P05451	High	Lithostathine-1-alpha [OS=Homo sapiens]	3	REG1A	97370.9	82023.5	131339	41557.2	63178.5	42892.6
P05556-1	High	Integrin beta-1 [OS=Homo sapiens]	30	ITGB1	1.11145e+08	1.53564e+08	1.49341e+08	4.74359e+07	1.18283e+08	4.87717e+07
P05783	High	Keratin, type I cytoskeletal 18 [OS=Homo sapiens]	20	KRT18	3.10529e+06	2.71256e+06	4.1455e+06	1.32532e+06	2.08935e+06	1.35384e+06
P05787	High	Keratin, type II cytoskeletal 8 [OS=Homo sapiens]	27	KRT8	6.59067e+06	7.48103e+06	8.14821e+06	2.81285e+06	5.76226e+06	2.66104e+06
P05937	High	Calbindin [OS=Homo sapiens]	13	CALB1	9.65257e+06	2.98827e+06	9.58939e+06	4.11964e+06	2.30171e+06	3.1317e+06
P06213-1	High	insulin receptor [OS=Homo sapiens]	5	INSR	120917	194966	191485	51606.5	150173	62535.2
P06280	High	alpha-galactosidase A [OS=Homo sapiens]	1	GLA	-	94391.2	95981.8	-	72704.8	31345.7
P06576	High	ATP synthase subunit beta, mitochondrial [OS=Homo sapiens]	1	ATP5B	2.74483e+08	2.80778e+08	2.14202e+08	1.17147e+08	2.16269e+08	6.99539e+07
P06702	High	Protein S100-A9 [OS=Homo sapiens]	5	S100A9	1.68181e+06	1.5911e+06	2.16965e+06	717782	1.22554e+06	708562
P06703	High	protein S100-A6 [OS=Homo sapiens]	2	S100A6	1.79187e+06	563382	1.74183e+06	764759	433944	568846
P06727	High	Apolipoprotein A-IV [OS=Homo sapiens]	5	APOA4	166848	394906	242798	71209.6	304176	79292.8
P06733-1	High	alpha-enolase [OS=Homo sapiens]	24	ENO1	3.67594e+07	1.33012e+07	5.31437e+07	1.56886e+07	1.02453e+07	1.73556e+07
P06748	High	Nucleophosmin [OS=Homo sapiens]	6	NPM1	791477	296252	1.06742e+06	337797	228188	348599
P06756	High	Integrin alpha-V [OS=Homo sapiens]	43	ITGAV	2.69197e+07	2.7059e+07	2.60448e+07	1.14891e+07	2.08422e+07	8.5057e+06
P07099	High	epoxide hydrolase 1 [OS=Homo sapiens]	23	EPHX1	2.49735e+07	2.72504e+07	2.07932e+07	1.06585e+07	2.09896e+07	6.79062e+06
P07195	High	L-lactate dehydrogenase B chain [OS=Homo sapiens]	16	LDHB	6.705e+07	1.80257e+07	7.0394e+07	2.86164e+07	1.38843e+07	2.29893e+07
P07237	High	Protein disulfide-isomerase [OS=Homo sapiens]	26	P4HB	2.11767e+07	3.68016e+07	3.20357e+07	9.03806e+06	2.83464e+07	1.04622e+07
P07305	High	Histone H1.0 [OS=Homo sapiens]	3	H1F0	1.00145e+07	7.93638e+06	9.9899e+06	4.27413e+06	6.11299e+06	3.2625e+06
P07355	High	Annexin A2 [OS=Homo sapiens]	25	ANXA2	4.01026e+07	1.57406e+08	4.72927e+07	1.71155e+07	1.21242e+08	1.54448e+07
P07357	High	Complement component C8 alpha chain [OS=Homo sapiens]	2	C8A	50406.2	37844.8	27448.6	21513	29149.9	8964.16
P07360	High	Complement component C8 gamma chain [OS=Homo sapiens]	2	C8G	118438	113711	82463.4	50548.4	87586.1	26930.9
P07384	High	Calpain-1 catalytic subunit [OS=Homo sapiens]	18	CAPN1	2.32956e+06	2.05481e+06	2.9043e+06	994237	1.58272e+06	948485
P07437	High	tubulin beta chain [OS=Homo sapiens]	5	TUBB	2.36478e+07	4.54501e+07	3.40336e+07	1.00927e+07	3.50079e+07	1.11147e+07
P07686	High	Beta-hexosaminidase subunit beta [OS=Homo sapiens]	4	HEXB	480403	513997	585567	205033	395906	191234
P07737	High	profilin-1 [OS=Homo sapiens]	6	PFN1	5.091e+06	2.05656e+06	8.13497e+06	2.1728e+06	1.58406e+06	2.65672e+06
P07741-1	High	Adenine phosphoribosyltransferase [OS=Homo sapiens]	3	APRT	315778	129683	579281	134772	99888.5	189181
P07814	High	Bifunctional glutamate/proline--tRNA ligase [OS=Homo sapiens]	8	EPRS	509568	169767	430421	217480	130763	140567
P07858	High	Cathepsin B [OS=Homo sapiens]	9	CTSB	3.27436e+06	3.55349e+06	4.30483e+06	1.39747e+06	2.73707e+06	1.40587e+06
P07900	High	Heat shock protein HSP 90-alpha [OS=Homo sapiens]	15	HSP90AA1	7.66828e+06	5.63906e+06	1.3044e+07	3.27276e+06	4.34348e+06	4.25992e+06
P07911	High	uromodulin [OS=Homo sapiens]	15	UMOD	8.50599e+06	4.35898e+06	1.82756e+06	3.63029e+06	3.3575e+06	596843
P07942	High	Laminin subunit beta-1 [OS=Homo sapiens]	19	LAMB1	2.10277e+06	1.69904e+06	3.585e+06	897445	1.30869e+06	1.17079e+06
P07948-1	High	Tyrosine-protein kinase Lyn [OS=Homo sapiens]	1	LYN	-	60502.9	42377.8	-	46602.4	13839.7
P07951-2	High	Isoform 2 of Tropomyosin beta chain [OS=Homo sapiens]	4	TPM2	201490	219247	618765	85994.4	168875	202076
P07954	High	fumarate hydratase, mitochondrial [OS=Homo sapiens]	18	FH	1.03188e+07	1.21066e+07	1.12318e+07	4.40398e+06	9.32514e+06	3.66807e+06
P07996	High	thrombospondin-1 [OS=Homo sapiens]	6	THBS1	49681.7	232191	-	21203.8	178845	-
P08133-1	High	annexin A6 [OS=Homo sapiens]	2	ANXA6	4.50278e+07	2.99471e+07	3.2611e+07	1.92175e+07	2.30667e+07	1.06501e+07
P08138	High	Tumor necrosis factor receptor superfamily member 16 [OS=Homo sapiens]	2	NGFR	748409	385599	320329	319415	297007	104613
P08236	High	beta-glucuronidase [OS=Homo sapiens]	6	GUSB	696692	664386	640809	297343	511743	209275
P08237	High	ATP-dependent 6-phosphofructokinase, muscle type [OS=Homo sapiens]	2	PFKM	171925	68130.6	173474	73376.4	52477.5	56653.2
P08238	High	Heat shock protein HSP 90-beta [OS=Homo sapiens]	15	HSP90AB1	1.64192e+07	1.47688e+07	3.13925e+07	7.00758e+06	1.13756e+07	1.02521e+07
P08263	High	Glutathione S-transferase A1 [OS=Homo sapiens]	1	GSTA1	1.05631e+06	148098	1.05148e+06	450824	114073	343391
P08294	High	Extracellular superoxide dismutase [Cu-Zn] [OS=Homo sapiens]	4	SOD3	286139	333380	587518	122122	256786	191871
P08473	High	Neprilysin [OS=Homo sapiens]	45	MME	1.25668e+08	1.40507e+08	9.27589e+07	5.36343e+07	1.08225e+08	3.02932e+07
P08493-1	High	matrix Gla protein [OS=Homo sapiens]	1	MGP	56181.1	105492	67952.7	23977.7	81254.8	22192
P08559	High	Pyruvate dehydrogenase E1 component subunit alpha, somatic form, mitochondrial [OS=Homo sapiens]	16	PDHA1	6.36917e+06	7.60493e+06	5.9819e+06	2.71831e+06	5.85769e+06	1.95357e+06
P08572	High	Collagen alpha-2(IV) chain [OS=Homo sapiens]	12	COL4A2	2.1812e+06	1.09919e+06	2.98694e+06	930918	846651	975474
P08575-1	High	Receptor-type tyrosine-protein phosphatase C [OS=Homo sapiens]	4	PTPRC	60741.9	13181.1	19403.4	25924.2	10152.8	6336.75
P08582-1	High	Melanotransferrin [OS=Homo sapiens]	5	MFI2; MELTF	237668	136837	506821	101435	105399	165518
P08621-1	High	U1 small nuclear ribonucleoprotein 70 kDa [OS=Homo sapiens]	2	SNRNP70	56304.4	160476	-	24030.3	123607	-
P08670	High	Vimentin [OS=Homo sapiens]	34	VIM	1.92645e+07	2.3412e+08	6.92034e+07	8.22196e+06	1.80331e+08	2.26004e+07
P08697-1	High	Alpha-2-antiplasmin [OS=Homo sapiens]	1	SERPINF2	19294.9	20183.7	26553.4	8234.92	15546.4	8671.79
P08727	High	Keratin, type I cytoskeletal 19 [OS=Homo sapiens]	12	KRT19	3.14543e+06	3.67987e+06	4.58676e+06	1.34245e+06	2.83442e+06	1.49794e+06
P08729	High	Keratin, type II cytoskeletal 7 [OS=Homo sapiens]	8	KRT7	188035	201245	242590	80252	155009	79224.9
P08754	High	Guanine nucleotide-binding protein G(k) subunit alpha [OS=Homo sapiens]	7	GNAI3	1.63128e+06	1.90353e+06	1.57175e+06	696218	1.46619e+06	513300
P08758	High	annexin A5 [OS=Homo sapiens]	16	ANXA5	7.9786e+06	4.26541e+06	1.2788e+07	3.40521e+06	3.28543e+06	4.1763e+06
P08779	High	Keratin, type I cytoskeletal 16 [OS=Homo sapiens]	19	KRT16	3.45553e+07	3.21971e+07	4.98008e+07	1.4748e+07	2.47998e+07	1.62639e+07
P08842	High	Steryl-sulfatase [OS=Homo sapiens]	2	STS	171176	147027	189044	73056.7	113247	61738
P08865	High	40S ribosomal protein SA [OS=Homo sapiens]	8	RPSA	1.58634e+06	478910	1.90902e+06	677040	368880	623449
P09110-1	High	3-ketoacyl-CoA thiolase, peroxisomal [OS=Homo sapiens]	21	ACAA1	4.1613e+06	6.15837e+06	5.1914e+06	1.77601e+06	4.74348e+06	1.69541e+06
P09211	High	Glutathione S-transferase P [OS=Homo sapiens]	12	GSTP1	1.63697e+07	4.03983e+06	1.57361e+07	6.98647e+06	3.11168e+06	5.13911e+06
P09382	High	Galectin-1 [OS=Homo sapiens]	8	LGALS1	1.63303e+07	1.58039e+07	1.73736e+07	6.96964e+06	1.2173e+07	5.67386e+06
P09417	High	dihydropteridine reductase [OS=Homo sapiens]	8	QDPR	3.32105e+06	969789	3.77025e+06	1.4174e+06	746979	1.23129e+06
P09488	High	Glutathione S-transferase Mu 1 [OS=Homo sapiens]	2	GSTM1	966116	32912	943977	412331	25350.5	308284
P09493-3	High	Isoform 3 of Tropomyosin alpha-1 chain [OS=Homo sapiens]	1	TPM1	365827	300163	730257	156132	231201	238487
P09496-2	High	Isoform Non-brain of Clathrin light chain A [OS=Homo sapiens]	4	CLTA	700560	496021	838420	298994	382060	273811
P09497-1	High	clathrin light chain B [OS=Homo sapiens]	2	CLTB	289065	339464	341936	123371	261472	111669
P09525	High	annexin A4 [OS=Homo sapiens]	19	ANXA4	1.74169e+07	6.31348e+06	1.11717e+07	7.4334e+06	4862955	3.64844e+06
P09543-1	High	2',3'-cyclic-nucleotide 3'-phosphodiesterase [OS=Homo sapiens]	12	CNP	1.20287e+06	1.28947e+06	991572	513375	993213	323827
P09601	High	heme oxygenase 1 [OS=Homo sapiens]	8	HMOX1	116317	277474	898368	49643.3	213724	293389
P09619	High	Platelet-derived growth factor receptor beta [OS=Homo sapiens]	19	PDGFRB	6.00043e+06	5.24677e+06	7.24085e+06	2.56094e+06	4.04132e+06	2.36471e+06
P09668	High	Pro-cathepsin H [OS=Homo sapiens]	6	CTSH	1.11943e+06	409194	473496	477763	315181	154634
P09669	High	Cytochrome c oxidase subunit 6C [OS=Homo sapiens]	5	COX6C	1.57323e+07	7.44267e+06	5.98872e+06	6.71443e+06	5.73271e+06	1.95579e+06
P09758	High	Tumor-associated calcium signal transducer 2 [OS=Homo sapiens]	4	TACSTD2	361174	428700	431024	154146	330206	140764
P09936	High	Ubiquitin carboxyl-terminal hydrolase isozyme L1 [OS=Homo sapiens]	3	UCHL1	422270	121168	471594	180222	93329.9	154013
P09960-1	High	leukotriene A-4 hydrolase [OS=Homo sapiens]	6	LTA4H	578943	241376	920117	247089	185919	300492
P0DJI8	High	Serum amyloid A-1 protein [OS=Homo sapiens]	3	SAA1	600117	313781	676423	256125	241690	220906
P0DJI9	High	Serum amyloid A-2 protein [OS=Homo sapiens]	3	SAA2	493446	148570	518823	210599	114436	169437
P0DOX6	High	immunoglobulin mu heavy chain [OS=Homo sapiens]	6	-	469301	264035	1.19866e+06	200294	203372	391458
P10114	High	Ras-related protein Rap-2a [OS=Homo sapiens]	1	RAP2A	65365.9	76635.3	86573.3	27897.7	59028.3	28273.1
P10155-1	High	60 kDa SS-A/Ro ribonucleoprotein [OS=Homo sapiens]	3	TROVE2	151900	98849.2	339807	64829.8	76138.6	110974
P10253	High	lysosomal alpha-glucosidase [OS=Homo sapiens]	6	GAA	420676	639547	902662	179541	492611	294791
P10301	High	Ras-related protein R-Ras [OS=Homo sapiens]	10	RRAS	5.93875e+06	1.22192e+07	1.5202e+07	2.53461e+06	9.41187e+06	4.96466e+06
P10515	High	Dihydrolipoyllysine-residue acetyltransferase component of pyruvate dehydrogenase complex, mitochondrial [OS=Homo sapiens]	14	DLAT	5.85326e+06	8.50101e+06	3.93521e+06	2.49813e+06	6.5479e+06	1.28516e+06
P10599-1	High	thioredoxin [OS=Homo sapiens]	5	TXN	3.07925e+06	2.00622e+06	4.71019e+06	1.3142e+06	1.54529e+06	1.53825e+06
P10606	High	Cytochrome c oxidase subunit 5B, mitochondrial [OS=Homo sapiens]	6	COX5B	8.81078e+06	4.08095e+06	3.61464e+06	3.76037e+06	3.14335e+06	1.18047e+06
P10620	High	Microsomal glutathione S-transferase 1 [OS=Homo sapiens]	4	MGST1	1.74907e+06	3.99367e+06	1.09055e+06	746491	3.07612e+06	356151
P10644	High	cAMP-dependent protein kinase type I-alpha regulatory subunit [OS=Homo sapiens]	3	PRKAR1A	131749	195531	177788	56229.4	150608	58062
P10768	High	S-formylglutathione hydrolase [OS=Homo sapiens]	9	ESD	1.54016e+06	499903	1.91873e+06	657328	385050	626617
P10809	High	60 kDa heat shock protein, mitochondrial [OS=Homo sapiens]	22	HSPD1	4.22127e+07	7.3039e+07	3.88555e+07	1.8016e+07	5.62582e+07	1.26894e+07
P10909-1	High	Clusterin [OS=Homo sapiens]	8	CLU	2.03543e+06	2.70291e+06	2.05176e+06	868708	2.08191e+06	670062
P11021	High	78 kDa glucose-regulated protein [OS=Homo sapiens]	34	HSPA5	4.75681e+07	1.19042e+08	6.77078e+07	2.03017e+07	9.1692e+07	2.2112e+07
P11047	High	Laminin subunit gamma-1 [OS=Homo sapiens]	37	LAMC1	8.74698e+06	3.64034e+06	1.4689e+07	3.73315e+06	2.80397e+06	4.79713e+06
P11142-1	High	Heat shock cognate 71 kDa protein [OS=Homo sapiens]	18	HSPA8	1.41823e+07	2.35192e+07	2.46367e+07	6.05291e+06	1.81157e+07	8.04586e+06
P11168	High	Solute carrier family 2, facilitated glucose transporter member 2 [OS=Homo sapiens]	3	SLC2A2	343266	849291	318463	146503	654166	104004
P11169	High	Solute carrier family 2, facilitated glucose transporter member 3 [OS=Homo sapiens]	2	SLC2A3	171583	311833	309533	73230.2	240189	101087
P11177	High	Pyruvate dehydrogenase E1 component subunit beta, mitochondrial [OS=Homo sapiens]	14	PDHB	1.00497e+07	7.82026e+06	7.02806e+06	4.28913e+06	6.02355e+06	2.29522e+06
P11182	High	Lipoamide acyltransferase component of branched-chain alpha-keto acid dehydrogenase complex, mitochondrial [OS=Homo sapiens]	16	DBT	3.39655e+06	2.5949e+06	1.48676e+06	1.44962e+06	1.99872e+06	485544
P11215-1	High	Integrin alpha-M [OS=Homo sapiens]	15	ITGAM	296372	123044	19594.8	126489	94774.4	6399.26
P11233	High	Ras-related protein Ral-A [OS=Homo sapiens]	3	RALA	1.01143e+06	1.85184e+06	1.44536e+06	431671	1.42638e+06	472025
P11234	High	Ras-related protein Ral-B [OS=Homo sapiens]	3	RALB	1.96738e+06	4.28637e+06	2.81837e+06	839661	3.30158e+06	920423
P11279	High	Lysosome-associated membrane glycoprotein 1 [OS=Homo sapiens]	4	LAMP1	1.47203e+07	1.39391e+07	1.16107e+07	6.2825e+06	1.07365e+07	3.79181e+06
P11498	High	pyruvate carboxylase, mitochondrial [OS=Homo sapiens]	24	PC	2.59492e+06	3.16772e+06	2.09117e+06	1.10749e+06	2.43993e+06	682935
P11586	High	C-1-tetrahydrofolate synthase, cytoplasmic [OS=Homo sapiens]	11	MTHFD1	618160	617057	1.39429e+06	263826	475288	455347
P11717	High	Cation-independent mannose-6-phosphate receptor [OS=Homo sapiens]	28	IGF2R	3.80371e+06	3.52101e+06	3.44306e+06	1.62339e+06	2.71206e+06	1.12443e+06
P12035	High	Keratin, type II cytoskeletal 3 [OS=Homo sapiens]	1	KRT3	21020.2	42450.7	-	8971.25	32697.6	-
P12110	High	Collagen alpha-2(VI) chain [OS=Homo sapiens]	10	COL6A2	1.17918e+06	448532	1.8958e+06	503265	345482	619130
P12111	High	Collagen alpha-3(VI) chain [OS=Homo sapiens]	44	COL6A3	6.89174e+06	5.36056e+06	1.28205e+07	2.94134e+06	4.12897e+06	4.18692e+06
P12235	High	ADP/ATP translocase 1 [OS=Homo sapiens]	4	SLC25A4	3.22402e+07	1.54386e+07	1.37608e+07	1.37599e+07	1.18916e+07	4.49399e+06
P12236	High	ADP/ATP translocase 3 [OS=Homo sapiens]	2	SLC25A6	3.71629e+07	1.99114e+07	2.00015e+07	1.58608e+07	1.53368e+07	6.53209e+06
P12273	High	Prolactin-inducible protein [OS=Homo sapiens]	6	PIP	1.63745e+06	1.73821e+06	1.64355e+06	698854	1.33885e+06	536752
P12532	High	Creatine kinase U-type, mitochondrial [OS=Homo sapiens]	4	CKMT1B; CKMT1A	345668	118360	100526	147528	91166.4	32829.9
P12814-3	High	Isoform 3 of Alpha-actinin-1 [OS=Homo sapiens]	28	ACTN1	6.27673e+06	1.0468e+07	7.96585e+06	2.67886e+06	8.063e+06	2.60148e+06
P12821-1	High	Angiotensin-converting enzyme [OS=Homo sapiens]	22	ACE	5.49874e+06	5.03194e+06	1.34017e+06	2.34682e+06	3.87585e+06	437672
P12955	High	xaa-Pro dipeptidase [OS=Homo sapiens]	8	PEPD	2.508e+06	963159	3.5037e+06	1.0704e+06	741872	1.14424e+06
P13010	High	X-ray repair cross-complementing protein 5 [OS=Homo sapiens]	11	XRCC5	3.94249e+06	183809	1.41823e+06	1.68262e+06	141579	463166
P13073	High	Cytochrome c oxidase subunit 4 isoform 1, mitochondrial [OS=Homo sapiens]	11	COX4I1	5.38704e+07	2.6132e+07	1.84494e+07	2.29915e+07	2.01282e+07	6.0252e+06
P13473-1	High	Lysosome-associated membrane glycoprotein 2 [OS=Homo sapiens]	4	LAMP2	4.01318e+06	3.18927e+06	3.38978e+06	1.71279e+06	2.45653e+06	1.10703e+06
P13489	High	Ribonuclease inhibitor [OS=Homo sapiens]	13	RNH1	1.58745e+06	762481	3.17434e+06	677512	587300	1.03667e+06
P13639	High	Elongation factor 2 [OS=Homo sapiens]	22	EEF2	4.35862e+06	1.7784e+06	6.78584e+06	1.86023e+06	1.36981e+06	2.21612e+06
P13645	High	Keratin, type I cytoskeletal 10 [OS=Homo sapiens]	33	KRT10	5.19512e+08	5.25211e+08	7.60809e+08	2.21724e+08	4.04543e+08	2.48465e+08
P13647	High	keratin, type II cytoskeletal 5 [OS=Homo sapiens]	22	KRT5	5.92168e+07	4.95986e+07	8.39838e+07	2.52733e+07	3.82033e+07	2.74274e+07
P13667	High	Protein disulfide-isomerase A4 [OS=Homo sapiens]	25	PDIA4	8.25509e+06	1.22384e+07	9.51186e+06	3.52321e+06	9.42664e+06	3.10638e+06
P13671	High	Complement component c6 [OS=Homo sapiens]	4	C6	257027	187397	131907	109697	144342	43078.2
P13674-1	High	prolyl 4-hydroxylase subunit alpha-1 [OS=Homo sapiens]	7	P4HA1	98868.5	715941	233230	42196.3	551453	76168.3
P13688-1	High	Carcinoembryonic antigen-related cell adhesion molecule 1 [OS=Homo sapiens]	5	CEACAM1	2.8096e+06	2.22934e+06	3.32664e+06	1.19912e+06	1.71715e+06	1.08641e+06
P13716-1	High	Delta-aminolevulinic acid dehydratase [OS=Homo sapiens]	7	ALAD	954935	247176	1.14655e+06	407559	190387	374440
P13726-1	High	tissue factor [OS=Homo sapiens]	6	F3	354845	978280	1.55409e+06	151445	753519	507535
P13747	High	HLA class I histocompatibility antigen, alpha chain E [OS=Homo sapiens]	5	HLA-E	704835	756227	997061	300818	582483	325620
P13761	High	HLA class II histocompatibility antigen, DRB1-7 beta chain [OS=Homo sapiens]	1	HLA-DRB3; LOC100507709; LOC100507714; LOC105369230; HLA-DRB1	4.46071e+06	2.44131e+07	2.79843e+07	1.9038e+06	1.88042e+07	9.1391e+06
P13798	High	Acylamino-acid-releasing enzyme [OS=Homo sapiens]	9	APEH	1.17215e+06	388657	1.50988e+06	500266	299363	493096
P13804-1	High	Electron transfer flavoprotein subunit alpha, mitochondrial [OS=Homo sapiens]	15	ETFA	8.8365e+06	8.79858e+06	7.93777e+06	3.77135e+06	6.7771e+06	2.59231e+06
P14174	High	Macrophage Migration inhibitory factor [OS=Homo sapiens]	2	MIF	1.81194e+06	1.12962e+06	3.59657e+06	773324	870087	1.17457e+06
P14324	High	Farnesyl pyrophosphate synthase [OS=Homo sapiens]	2	FDPS	145547	92439.9	140485	62118.2	71201.8	45879.7
P14384	High	Carboxypeptidase M [OS=Homo sapiens]	7	CPM	444571	794865	580372	189740	612245	189538
P14406	High	Cytochrome c oxidase subunit 7A2, mitochondrial [OS=Homo sapiens]	3	COX7A2	1.15849e+07	6.27788e+06	4.19675e+06	4.94433e+06	4.83553e+06	1.37057e+06
P14415	High	sodium/potassium-transporting ATPase subunit beta-2 [OS=Homo sapiens]	2	ATP1B2	146331	191234	354941	62453	147298	115916
P14543-1	High	Nidogen-1 [OS=Homo sapiens]	14	NID1	5.29159e+06	3.49925e+06	1.10622e+07	2.25841e+06	2.69529e+06	3.61268e+06
P14550	High	alcohol dehydrogenase [NADP(+)] [OS=Homo sapiens]	11	AKR1A1	7.25123e+06	3.27369e+06	1.2296e+07	3.09477e+06	2.52156e+06	4.01561e+06
P14618	High	Pyruvate kinase PKM [OS=Homo sapiens]	24	PKM	1.71381e+07	4.73182e+06	2.03445e+07	7.31442e+06	3.64468e+06	6.64409e+06
P14625	High	Endoplasmin [OS=Homo sapiens]	46	HSP90B1	9.14818e+07	1.07046e+08	8.86608e+07	3.90438e+07	8.24522e+07	2.89548e+07
P14854	High	Cytochrome c oxidase subunit 6B1 [OS=Homo sapiens]	7	COX6B1	9.44234e+06	4.57774e+06	4.64514e+06	4.02992e+06	3.526e+06	1.51701e+06
P14923	High	Junction plakoglobin [OS=Homo sapiens]	27	JUP	8.87484e+06	1.51762e+07	1.20833e+07	3.78771e+06	1.16894e+07	3.94615e+06
P14927	High	Cytochrome b-c1 complex subunit 7 [OS=Homo sapiens]	8	UQCRB	1.65219e+07	6.77536e+06	6.25908e+06	7.05141e+06	5.21871e+06	2.04409e+06
P15090	High	Fatty acid-binding protein, adipocyte [OS=Homo sapiens]	2	FABP4	184620	121003	190836	78794.6	93202.3	62323.3
P15121	High	aldose reductase [OS=Homo sapiens]	5	AKR1B1	875873	406482	1.04234e+06	373816	313092	340407
P15291	High	Beta-1,4-galactosyltransferase 1 [OS=Homo sapiens]	3	B4GALT1	81804.9	95236.4	127885	34913.7	73355.8	41764.6
P15309-1	High	Prostatic acid phosphatase [OS=Homo sapiens]	4	ACPP	291691	195248	73793	124492	150390	24099.3
P15529-1	High	Membrane cofactor protein [OS=Homo sapiens]	1	CD46	2.81223e+06	2.88347e+06	3.24326e+06	1.20024e+06	2.22099e+06	1.05918e+06
P15529-2	High	Isoform B of Membrane cofactor protein [OS=Homo sapiens]	1	CD46	39299.4	193300	97983.3	16772.7	148889	31999.4
P15907	High	Beta-galactoside alpha-2,6-sialyltransferase 1 [OS=Homo sapiens]	8	ST6GAL1	149899	341802	326786	63976	263272	106722
P15924-1	High	Desmoplakin [OS=Homo sapiens]	66	DSP	1.042e+07	1.22778e+07	1.56772e+07	4.44716e+06	9.45697e+06	5.11987e+06
P15954	High	Cytochrome c oxidase subunit 7C, mitochondrial [OS=Homo sapiens]	3	COX7C	2.91835e+06	1.16096e+06	1.22341e+06	1.24553e+06	894227	399541
P16066	High	Atrial natriuretic peptide receptor 1 [OS=Homo sapiens]	14	NPR1	1.32331e+06	1.90242e+06	1.50104e+06	564781	1.46533e+06	490208
P16152	High	Carbonyl reductase [NADPH] 1 [OS=Homo sapiens]	13	CBR1; SETD4	6.68936e+06	2.09732e+06	6.22408e+06	2.85497e+06	1.61546e+06	2.03266e+06
P16219	High	Short-chain specific acyl-CoA dehydrogenase, mitochondrial [OS=Homo sapiens]	1	ACADS	63621.2	38290	31708.6	27153.1	29492.8	10355.4
P16234-1	High	Platelet-derived growth factor receptor alpha [OS=Homo sapiens]	2	PDGFRA	141574	-	270431	60422.6	-	88317.2
P16278	High	Beta-galactosidase [OS=Homo sapiens]	7	GLB1	727710	556384	577399	310581	428554	188567
P16284	High	Platelet endothelial cell adhesion molecule [OS=Homo sapiens]	2	PECAM1	594694	-	370976	253811	-	121153
P16401	High	Histone H1.5 [OS=Homo sapiens]	3	HIST1H1B	64242.6	185657	150374	27418.3	143002	49109.1
P16422	High	Epithelial cell adhesion molecule [OS=Homo sapiens]	8	EPCAM	1.96401e+06	1.61103e+06	897548	838224	1.2409e+06	293121
P16615	High	Sarcoplasmic/endoplasmic reticulum calcium ATPase 2 [OS=Homo sapiens]	32	ATP2A2	1.64327e+07	2.36069e+07	1.55082e+07	7.01334e+06	1.81832e+07	5.06465e+06
P16662	High	UDP-glucuronosyltransferase 2B7 [OS=Homo sapiens]	14	UGT2B7	3.37184e+07	6.02562e+07	1.74549e+07	1.43908e+07	4.64123e+07	5.70043e+06
P16930	High	Fumarylacetoacetase [OS=Homo sapiens]	11	FAH	1.93562e+06	983895	4.21727e+06	826107	757845	1.37727e+06
P17050	High	alpha-N-acetylgalactosaminidase [OS=Homo sapiens]	4	NAGA	130444	370487	582031	55672.7	285368	190079
P17152	High	Transmembrane protein 11, mitochondrial [OS=Homo sapiens]	3	TMEM11	783660	589419	501144	334460	454000	163663
P17174	High	Aspartate aminotransferase, cytoplasmic [OS=Homo sapiens]	13	GOT1	3.38877e+06	1.08647e+06	5.1014e+06	1.4463e+06	836853	1.66601e+06
P17252	High	Protein kinase C alpha type [OS=Homo sapiens]	11	PRKCA	995155	2.52054e+06	722286	424725	1.94145e+06	235884
P17301	High	Integrin alpha-2 [OS=Homo sapiens]	4	ITGA2	6.90425e+06	7.31167e+06	6.08733e+06	2.94668e+06	5.63181e+06	1.988e+06
P17540	High	Creatine kinase S-type, mitochondrial [OS=Homo sapiens]	7	CKMT2	1.4234e+06	868884	742404	607494	669258	242454
P17568	High	NADH dehydrogenase [ubiquinone] 1 beta subcomplex subunit 7 [OS=Homo sapiens]	7	NDUFB7	4.6969e+06	2.72374e+06	1.45694e+06	2.0046e+06	2.09796e+06	475807
P17655-1	High	Calpain-2 catalytic subunit [OS=Homo sapiens]	14	CAPN2	2.32764e+06	1.13993e+06	3.52056e+06	993420	878029	1.14974e+06
P17693	High	HLA class I histocompatibility antigen, alpha chain G [OS=Homo sapiens]	1	HLA-G	97895.4	70332.5	73385.3	41781	54173.5	23966.1
P17813	High	Endoglin [OS=Homo sapiens]	17	ENG	5.20943e+06	1.07031e+07	8.19123e+06	2.22335e+06	8.24407e+06	2.67509e+06
P17858-1	High	ATP-dependent 6-phosphofructokinase, liver type [OS=Homo sapiens]	10	PFKL	1.92356e+06	1.4375e+06	1.59611e+06	820960	1.10723e+06	521258
P17900	High	Ganglioside GM2 activator [OS=Homo sapiens]	2	GM2A	381781	333620	537477	162941	256971	175529
P17948-1	High	Vascular endothelial growth factor receptor 1 [OS=Homo sapiens]	1	FLT1	39069.9	31303.2	58214.7	16674.7	24111.3	19011.7
P17980	High	26S proteasome regulatory subunit 6A [OS=Homo sapiens]	2	PSMC3	162223	92470.6	203731	69235.4	71225.4	66534.3
P17987	High	T-complex protein 1 subunit alpha [OS=Homo sapiens]	17	TCP1	3.10463e+06	1.27369e+06	3.31587e+06	1.32503e+06	981058	1.0829e+06
P18031	High	Tyrosine-protein phosphatase non-receptor type 1 [OS=Homo sapiens]	5	PTPN1	44710	310759	133250	19081.9	239362	43516.8
P18077	Medium	60S ribosomal protein L35a [OS=Homo sapiens]	1	RPL35A	89251.6	36393.8	90419.3	38091.9	28032.3	29529.1
P18084	High	Integrin beta-5 [OS=Homo sapiens]	16	ITGB5	1.78436e+06	2.55035e+06	1.88057e+06	761551	1.96441e+06	614157
P18085	High	ADP-ribosylation factor 4 [OS=Homo sapiens]	6	ARF4	6.36223e+06	2.73836e+06	5.24426e+06	2.71535e+06	2.10922e+06	1.71267e+06
P18206	High	Vinculin [OS=Homo sapiens]	40	VCL	1.41829e+07	2.04532e+07	1.90586e+07	6.05315e+06	1.5754e+07	6.22414e+06
P18428	High	lipopolysaccharide-binding protein [OS=Homo sapiens]	4	LBP	211558	163416	206961	90291.4	125871	67589.2
P18669	High	Phosphoglycerate mutase 1 [OS=Homo sapiens]	10	PGAM1; LOC643576	5.01524e+06	1.84384e+06	5.96309e+06	2.14047e+06	1.42021e+06	1.94743e+06
P18754-1	High	Regulator of chromosome condensation [OS=Homo sapiens]	3	RCC1	11565.9	76624.4	22643	4936.24	59019.9	7394.73
P18859	High	ATP synthase-coupling factor 6, mitochondrial [OS=Homo sapiens]	5	ATP5J	1.76793e+06	874873	1.03996e+06	754537	673870	339631
P19022	High	Cadherin-2 [OS=Homo sapiens]	4	CDH2	96721	512024	63293.9	41279.8	394386	20670.5
P19224	High	UDP-glucuronosyltransferase 1-6 [OS=Homo sapiens]	11	UGT1A6	1.49938e+07	1.99734e+07	8.00848e+06	6.39923e+06	1.53845e+07	2.61541e+06
P19320-1	High	Vascular cell adhesion protein 1 [OS=Homo sapiens]	6	VCAM1	606165	391974	640502	258707	301918	209175
P19801	High	Amiloride-sensitive amine oxidase [copper-containing] [OS=Homo sapiens]	9	ABP1; AOC1	391144	415681	1.15334e+06	166937	320178	376656
P19878	Medium	Neutrophil cytosol factor 2 [OS=Homo sapiens]	1	NCF2	608318	1.11489e+06	-	259625	858742	-
P20020	High	Plasma membrane calcium-transporting ATPase 1 [OS=Homo sapiens]	8	ATP2B1	1.41944e+06	1.41193e+06	1.42358e+06	605806	1.08754e+06	464914
P20339	High	Ras-related protein Rab-5A [OS=Homo sapiens]	6	RAB5A	220262	1.16235e+06	450978	94006.2	895299	147280
P20618	High	proteasome subunit beta type-1 [OS=Homo sapiens]	6	PSMB1	1.35734e+06	379601	1.5824e+06	579304	292387	516778
P20674	High	Cytochrome c oxidase subunit 5A, mitochondrial [OS=Homo sapiens]	8	COX5A	1.82923e+07	8.99448e+06	7.03067e+06	7.80701e+06	6.92799e+06	2.29607e+06
P20700	High	Lamin-B1 [OS=Homo sapiens]	8	LMNB1	43930.1	1.07462e+06	268781	18749	827725	87778.6
P20702	High	Integrin alpha-X [OS=Homo sapiens]	1	ITGAX	1.50509e+06	1.20223e+06	2.67227e+06	642360	926017	872709
P20933	High	N(4)-(beta-N-acetylglucosaminyl)-L-asparaginase [OS=Homo sapiens]	1	AGA	29265.3	48522.8	42597.5	12490.2	37374.7	13911.5
P21266	High	glutathione S-transferase Mu 3 [OS=Homo sapiens]	7	GSTM3	4.03352e+06	739272	2.92539e+06	1.72148e+06	569424	955374
P21281	High	V-type proton ATPase subunit B, brain isoform [OS=Homo sapiens]	10	ATP6V1B2	5.04976e+06	3.42902e+06	2.89935e+06	2.1552e+06	2.6412e+06	946870
P21283	High	V-type proton ATPase subunit C 1 [OS=Homo sapiens]	9	ATP6V1C1	750619	523922	524152	320358	403551	171177
P21291	High	Cysteine and glycine-rich protein 1 [OS=Homo sapiens]	5	CSRP1	544734	425022	774314	232489	327373	252875
P21333	High	Filamin-A [OS=Homo sapiens]	76	FLNA	1.60455e+07	1.70661e+07	2.57393e+07	6.8481e+06	1.31451e+07	8.40594e+06
P21397	High	Amine oxidase [flavin-containing] A [OS=Homo sapiens]	19	MAOA	2.24836e+07	1.10987e+07	8.08631e+06	9.59585e+06	8.54875e+06	2.64083e+06
P21399	High	Cytoplasmic aconitate hydratase [OS=Homo sapiens]	15	ACO1	4.59013e+06	1.41178e+06	4.63675e+06	1.95903e+06	1.08742e+06	1.51427e+06
P21695-1	High	Glycerol-3-phosphate dehydrogenase [NAD(+)], cytoplasmic [OS=Homo sapiens]	21	GPD1	7.19847e+06	3.12025e+06	1.14151e+07	3.07226e+06	2.40337e+06	3.72794e+06
P21731	High	Thromboxane A2 receptor [OS=Homo sapiens]	2	TBXA2R	138872	169537	203237	59269.4	130586	66373
P21796	High	voltage-dependent anion-selective channel protein 1 [OS=Homo sapiens]	19	VDAC1	1.19155e+08	7.33238e+07	4.81758e+07	5.08546e+07	5.64776e+07	1.57332e+07
P21854	Medium	B-cell differentiation antigen CD72 [OS=Homo sapiens]	1	CD72	218777	213178	155982	93372.4	164200	50940.5
P21912	High	Succinate dehydrogenase [ubiquinone] iron-sulfur subunit, mitochondrial [OS=Homo sapiens]	16	SDHB	3.09543e+07	2.09875e+07	1.40652e+07	1.32111e+07	1.61656e+07	4.59342e+06
P21964-1	High	Catechol O-methyltransferase [OS=Homo sapiens]	9	COMT	6.42207e+06	5.18461e+06	5.97235e+06	2.74089e+06	3.99344e+06	1.95045e+06
P21980	High	Protein-glutamine gamma-glutamyltransferase 2 [OS=Homo sapiens]	16	TGM2	782745	3.44479e+06	1.72305e+06	334070	2.65335e+06	562712
P22033	High	Methylmalonyl-CoA mutase, mitochondrial [OS=Homo sapiens]	13	MUT	1.83032e+06	1.38398e+06	1.63897e+06	781169	1.06601e+06	535253
P22059	High	Oxysterol-binding protein 1 [OS=Homo sapiens]	5	OSBP	330336	323243	316763	140985	248977	103448
P22314	High	Ubiquitin-like modifier-activating enzyme 1 [OS=Homo sapiens]	20	UBA1	5.33716e+06	1.78615e+06	6.92068e+06	2.27786e+06	1.37578e+06	2.26015e+06
P22352	High	Glutathione peroxidase 3 [OS=Homo sapiens]	6	GPX3	1.42454e+07	2.26127e+07	2.42552e+07	6.07983e+06	1.74174e+07	7.92126e+06
P22413	High	Ectonucleotide pyrophosphatase/phosphodiesterase family member 1 [OS=Homo sapiens]	9	ENPP1	360105	594067	253213	153690	457580	82694.4
P22528	High	Cornifin-B [OS=Homo sapiens]	2	SPRR1B	-	138991	120895	-	107057	39481.7
P22531	High	Small proline-rich protein 2E [OS=Homo sapiens]	3	SPRR2E	1.20831e+06	1.31053e+06	1.24054e+06	515699	1.00943e+06	405135
P22626	High	heterogeneous nuclear ribonucleoproteins A2/B1 [OS=Homo sapiens]	7	HNRNPA2B1	397964	2.66077e+06	1.30246e+06	169848	2.04945e+06	425358
P22692	Medium	insulin-like growth factor-binding protein 4 [OS=Homo sapiens]	1	IGFBP4	39963.2	67047.6	-	17056	51643.4	-
P22695	High	Cytochrome b-c1 complex subunit 2, mitochondrial [OS=Homo sapiens]	19	UQCRC2	4.88918e+07	3.55823e+07	2.39408e+07	2.08667e+07	2.74073e+07	7.81859e+06
P23142	High	Fibulin-1 [OS=Homo sapiens]	5	FBLN1	209972	185855	290987	89614.7	143155	95030.3
P23219	High	Prostaglandin G/H synthase 1 [OS=Homo sapiens]	6	PTGS1	316965	309725	766142	135278	238566	250206
P23229-1	High	integrin alpha-6 [OS=Homo sapiens]	34	ITGA6	5.40196e+06	1.13474e+07	6.51785e+06	2.30552e+06	8.74035e+06	2.1286e+06
P23368-1	High	NAD-dependent malic enzyme, mitochondrial [OS=Homo sapiens]	13	ME2	1.09868e+06	1.19059e+06	1.05304e+06	468909	917055	343902
P23378	High	Glycine dehydrogenase (Decarboxylating), mitochondrial [OS=Homo sapiens]	14	GLDC	1.08259e+06	818599	841215	462039	630525	274724
P23381	High	Tryptophan--tRNA ligase, cytoplasmic [OS=Homo sapiens]	5	WARS	406347	432034	1.55604e+06	173426	332774	508171
P23396-1	High	40S ribosomal protein S3 [OS=Homo sapiens]	5	RPS3	1.0752e+06	712187	1.19888e+06	458889	548561	391531
P23470	High	Receptor-type tyrosine-protein phosphatase gamma [OS=Homo sapiens]	5	PTPRG	217388	485118	385660	92779.4	373662	125949
P23490	High	loricrin [OS=Homo sapiens]	1	LOR	86909.2	86956.1	164185	37092.2	66977.9	53619.4
P23526-1	High	Adenosylhomocysteinase [OS=Homo sapiens]	14	AHCY	8.38015e+06	2.47184e+06	1.09255e+07	3.57659e+06	1.90393e+06	3.56805e+06
P23634-1	High	Plasma membrane calcium-transporting ATPase 4 [OS=Homo sapiens]	16	ATP2B4	1.37731e+07	1.52147e+07	1.64455e+07	5.87824e+06	1.17191e+07	5.37076e+06
P23786	High	Carnitine O-palmitoyltransferase 2, mitochondrial [OS=Homo sapiens]	3	CPT2	6.52439e+06	4.78839e+06	2.77641e+06	2.78456e+06	3.68826e+06	906720
P24298	High	Alanine aminotransferase 1 [OS=Homo sapiens]	4	GPT	278710	120238	352048	118951	92613	114972
P24310	High	Cytochrome c oxidase subunit 7A1, mitochondrial [OS=Homo sapiens]	2	COX7A1	2.86952e+06	1.58673e+06	1.12469e+06	1.22469e+06	1.22218e+06	367302
P24311	Medium	Cytochrome c oxidase subunit 7B, mitochondrial [OS=Homo sapiens]	1	COX7B	955620	656790	342155	407852	505892	111741
P24390	High	ER lumen protein-retaining receptor 1 [OS=Homo sapiens]	2	KDELR1	548354	493799	475600	234034	380348	155321
P24530-1	High	Endothelin receptor type B [OS=Homo sapiens]	1	EDNRB	44474.6	33389.7	20489.7	18981.4	25718.4	6691.52
P24534	High	Elongation factor 1-beta [OS=Homo sapiens]	2	EEF1B2	441920	144762	478247	188608	111503	156186
P24539	High	ATP synthase F(0) complex subunit B1, mitochondrial [OS=Homo sapiens]	18	ATP5F1	5.93657e+07	4.05079e+07	2.70399e+07	2.53368e+07	3.12012e+07	8.83068e+06
P24752	High	Acetyl-CoA acetyltransferase, mitochondrial [OS=Homo sapiens]	18	ACAT1	3.65489e+07	3.19353e+07	2.12084e+07	1.55988e+07	2.45982e+07	6.92624e+06
P24844-1	High	Myosin regulatory light polypeptide 9 [OS=Homo sapiens]	2	MYL9	1.27822e+06	598889	898462	545535	461294	293420
P25311	High	Zinc-alpha-2-glycoprotein [OS=Homo sapiens]	9	AZGP1	731851	600457	845727	312349	462501	276197
P25325	High	3-mercaptopyruvate sulfurtransferase [OS=Homo sapiens]	7	MPST	1.13116e+06	677636	1.2911e+06	482772	521949	421647
P25398	High	40S ribosomal protein S12 [OS=Homo sapiens]	2	RPS12	373084	113496	485178	159230	87420.3	158449
P25705-1	High	ATP synthase subunit alpha, mitochondrial [OS=Homo sapiens]	35	ATP5A1	2.41591e+08	2.02753e+08	1.42647e+08	1.03109e+08	1.5617e+08	4.65855e+07
P25774-1	High	cathepsin S [OS=Homo sapiens]	3	CTSS	198949	123795	294897	84910	95353.2	96307.4
P25786-1	High	Proteasome subunit alpha type-1 [OS=Homo sapiens]	5	PSMA1	549070	181711	756147	234339	139963	246942
P25787	High	Proteasome subunit alpha type-2 [OS=Homo sapiens]	6	PSMA2	1.36457e+06	417261	1.74047e+06	582386	321395	568401
P25788-1	High	Proteasome subunit alpha type-3 [OS=Homo sapiens]	3	PSMA3	925396	243080	1.10826e+06	394952	187232	361935
P25789	High	Proteasome subunit alpha type-4 [OS=Homo sapiens]	7	PSMA4	2.5801e+06	1.68022e+06	2.87254e+06	1.10117e+06	1.29419e+06	938112
P25942-1	Medium	Tumor necrosis factor receptor superfamily member 5 [OS=Homo sapiens]	1	CD40	45071.7	38604.4	75787.4	19236.2	29735	24750.6
P26006	High	Integrin alpha-3 [OS=Homo sapiens]	26	ITGA3	5.97328e+07	6.51381e+07	8.44484e+07	2.54935e+07	5.01726e+07	2.75791e+07
P26012	High	integrin beta-8 [OS=Homo sapiens]	2	ITGB8	37906.6	112889	38223.5	16178.3	86952.9	12483
P26038	High	Moesin [OS=Homo sapiens]	25	MSN	4.10872e+07	6.1287e+07	5.71531e+07	1.75357e+07	4.72063e+07	1.8665e+07
P26196	High	Probable ATP-dependent RNA helicase DDX6 [OS=Homo sapiens]	1	DDX6	85164.4	34991.7	109707	36347.5	26952.3	35828.2
P26373-1	High	60S ribosomal protein L13 [OS=Homo sapiens]	2	RPL13	154342	125010	93686.8	65871.9	96288.9	30596.2
P26440	High	Isovaleryl-CoA dehydrogenase, mitochondrial [OS=Homo sapiens]	14	IVD	4.3031e+06	4.083e+06	5.06163e+06	1.83653e+06	3.14492e+06	1.65303e+06
P26447	High	Protein S100-A4 [OS=Homo sapiens]	1	S100A4	58461.5	27670.3	43738.5	24950.9	21313	14284.1
P26572	High	alpha-1,3-mannosyl-glycoprotein 2-beta-N-acetylglucosaminyltransferase [OS=Homo sapiens]	3	MGAT1	96889.3	200640	195674	41351.7	154543	63903.3
P26641	High	elongation factor 1-gamma [OS=Homo sapiens]	5	EEF1G	1.29757e+06	352438	1.39486e+06	553793	271465	455533
P26885	High	Peptidyl-prolyl cis-trans isomerase FKBP2 [OS=Homo sapiens]	6	FKBP2	1.56035e+06	2.15893e+06	1.56136e+06	665946	1.66292e+06	509909
P27105	High	erythrocyte band 7 integral membrane protein [OS=Homo sapiens]	13	STOM	1.45918e+07	1.77935e+07	1.46701e+07	6.22766e+06	1.37054e+07	4.79096e+06
P27144	High	Adenylate kinase 4, mitochondrial [OS=Homo sapiens]	9	AK4; LOC100507855	2.72924e+06	2.42785e+06	2.84009e+06	1.16482e+06	1.87005e+06	927517
P27338	High	Amine oxidase [flavin-containing] B [OS=Homo sapiens]	23	MAOB	4.58584e+07	3.3392e+07	1.99343e+07	1.9572e+07	2.57202e+07	6.51012e+06
P27348	High	14-3-3 protein theta [OS=Homo sapiens]	10	YWHAQ	2.72886e+06	949805	4.3159e+06	1.16466e+06	731586	1.40949e+06
P27449	High	V-type proton ATPase 16 kDa proteolipid subunit [OS=Homo sapiens]	1	ATP6V0C	1.01395e+06	798096	442720	432746	614733	144583
P27482	High	Calmodulin-like protein 3 [OS=Homo sapiens]	2	CALML3	58391.5	43067.1	90390.6	24921.1	33172.4	29519.7
P27487	High	Dipeptidyl peptidase 4 [OS=Homo sapiens]	25	DPP4	1.61572e+07	1.37331e+07	7.6109e+06	6.89579e+06	1.05779e+07	2.48556e+06
P27695	High	DNA-(apurinic or apyrimidinic site) lyase [OS=Homo sapiens]	3	APEX1	205775	46010.6	278552	87823.2	35439.7	90969.5
P27816-1	High	Microtubule-associated protein 4 [OS=Homo sapiens]	1	MAP4	24228.2	28284	47251.3	10340.4	21785.7	15431.3
P27824	High	Calnexin [OS=Homo sapiens]	19	CANX	3.35549e+07	5.34987e+07	3.58784e+07	1.4321e+07	4.12073e+07	1.17172e+07
P28070	High	Proteasome subunit beta type-4 [OS=Homo sapiens]	5	PSMB4	1.12749e+06	320060	1.45635e+06	481206	246526	475613
P28072	High	Proteasome subunit beta type-6 [OS=Homo sapiens]	2	PSMB6	565671	124441	454392	241424	95850.4	148395
P28074-1	High	proteasome subunit beta type-5 [OS=Homo sapiens]	3	PSMB5	408985	129986	339599	174552	100122	110906
P28331-1	High	NADH-ubiquinone oxidoreductase 75 kDa subunit, mitochondrial [OS=Homo sapiens]	32	NDUFS1	5.78663e+07	3.17949e+07	1.85063e+07	2.46969e+07	2.449e+07	6.04377e+06
P28332-1	High	Alcohol dehydrogenase 6 [OS=Homo sapiens]	2	ADH6	121839	40091.5	239706	51999.8	30880.4	78283
P28482	High	mitogen-activated protein kinase 1 [OS=Homo sapiens]	5	MAPK1	838716	438691	544096	357958	337902	177691
P28838	High	cytosol aminopeptidase [OS=Homo sapiens]	18	LAP3	4.54517e+06	2.8085e+06	6.81079e+06	1.93985e+06	2.16324e+06	2.22427e+06
P28906	High	Hematopoietic progenitor cell antigen CD34 [OS=Homo sapiens]	3	CD34	4.52283e+06	9.55601e+06	7.24836e+06	1.93031e+06	7.36051e+06	2.36717e+06
P29401	High	Transketolase [OS=Homo sapiens]	9	TKT	2.72186e+06	825405	3.52646e+06	1.16167e+06	635768	1.15167e+06
P29474	High	Nitric oxide synthase, endothelial [OS=Homo sapiens]	2	NOS3	-	86951.6	75949.1	-	66974.5	24803.4
P29508	High	Serpin B3 [OS=Homo sapiens]	5	SERPINB3	377651	228142	495660	161179	175727	161872
P29692	High	Elongation factor 1-delta [OS=Homo sapiens]	3	EEF1D	105231	136049	202234	44911.9	104792	66045.4
P29992	High	guanine nucleotide-binding protein subunit alpha-11 [OS=Homo sapiens]	10	GNA11	6.51315e+06	1.23426e+07	1.26214e+07	2.77976e+06	9.50686e+06	4.12191e+06
P30038	High	Delta-1-pyrroline-5-carboxylate dehydrogenase, mitochondrial [OS=Homo sapiens]	24	ALDH4A1	1.57839e+07	1.1968e+07	1.86588e+07	6.73644e+06	9.21833e+06	6.09359e+06
P30039	High	Phenazine biosynthesis-like domain-containing protein [OS=Homo sapiens]	11	PBLD	3.55488e+06	1.3941e+06	5.55795e+06	1.5172e+06	1.07381e+06	1.81511e+06
P30040-1	High	Endoplasmic reticulum resident protein 29 [OS=Homo sapiens]	11	ERP29	3.84295e+06	3.45021e+06	3.37758e+06	1.64014e+06	2.65753e+06	1.10305e+06
P30041	High	Peroxiredoxin-6 [OS=Homo sapiens]	12	PRDX6	7.39419e+06	2.56912e+06	1.0022e+07	3.15579e+06	1.97886e+06	3.27297e+06
P30043	High	flavin reductase (NADPH) [OS=Homo sapiens]	6	BLVRB	1.1002e+06	357336	1.26522e+06	469558	275238	413195
P30044-1	High	Peroxiredoxin-5, mitochondrial [OS=Homo sapiens]	10	PRDX5	7.09382e+06	5.49829e+06	6.39079e+06	3.02759e+06	4.23506e+06	2.0871e+06
P30046	High	D-dopachrome decarboxylase [OS=Homo sapiens]	4	DDT	1.05383e+06	228277	1.16682e+06	449767	175831	381060
P30048	High	Thioredoxin-dependent peroxide reductase, mitochondrial [OS=Homo sapiens]	10	PRDX3	2.22971e+07	2.02518e+07	1.72854e+07	9.51625e+06	1.55989e+07	5.64508e+06
P30049	High	ATP synthase subunit delta, mitochondrial [OS=Homo sapiens]	2	ATP5D	7.18406e+06	3.9891e+06	3.57343e+06	3.0661e+06	3.0726e+06	1.16701e+06
P30050-1	High	60S ribosomal protein L12 [OS=Homo sapiens]	6	RPL12	1.55253e+06	1.13544e+06	1.56463e+06	662607	874569	510977
P30084	High	Enoyl-CoA hydratase, mitochondrial [OS=Homo sapiens]	15	ECHS1	2.49966e+07	2.28386e+07	2.67874e+07	1.06684e+07	1.75914e+07	8.74823e+06
P30086	High	phosphatidylethanolamine-binding protein 1 [OS=Homo sapiens]	10	PEBP1	1.48336e+07	6.56815e+06	1.81279e+07	6.33086e+06	5.05912e+06	5.92021e+06
P30405	High	Peptidyl-prolyl cis-trans isomerase F, mitochondrial [OS=Homo sapiens]	2	PPIF	311374	224001	155840	132892	172537	50894.2
P30512	High	HLA class I histocompatibility antigen, A-29 alpha chain [OS=Homo sapiens]	1	HLA-A	5.87571e+06	201559	-	2.50771e+06	155250	-
P30626-1	High	Sorcin [OS=Homo sapiens]	5	SRI	432695	503474	516141	184671	387801	168561
P30711	High	Glutathione S-transferase theta-1 [OS=Homo sapiens]	7	GSTT1	498341	368578	1.74312e+06	212688	283897	569268
P30740	High	Leukocyte elastase inhibitor [OS=Homo sapiens]	3	SERPINB1	508180	393628	908351	216888	303192	296649
P30837	High	Aldehyde dehydrogenase X, mitochondrial [OS=Homo sapiens]	17	ALDH1B1	2.41853e+06	3.50972e+06	4.76698e+06	1.03221e+06	2.70336e+06	1.5568e+06
P31025	High	Lipocalin-1 [OS=Homo sapiens]	2	LCN1	236706	200844	391125	101024	154700	127734
P31040	High	Succinate dehydrogenase [ubiquinone] flavoprotein subunit, mitochondrial [OS=Homo sapiens]	31	SDHA	7.24727e+07	4.20792e+07	3.2884e+07	3.09308e+07	3.24115e+07	1.07392e+07
P31150	High	Rab GDP dissociation inhibitor alpha [OS=Homo sapiens]	8	GDI1	420119	178778	796007	179304	137704	259960
P31151	High	Protein S100-A7 [OS=Homo sapiens]	3	S100A7	219137	276988	488349	93526.1	213350	159485
P31327-1	High	Carbamoyl-phosphate synthase [ammonia], mitochondrial [OS=Homo sapiens]	1	CPS1	24199.6	16724.1	-	10328.2	12881.7	-
P31512	High	Dimethylaniline monooxygenase [N-oxide-forming] 4 [OS=Homo sapiens]	3	FMO4	605916	225888	62244.8	258600	173990	20327.9
P31639	High	sodium/glucose cotransporter 2 [OS=Homo sapiens]	9	SLC5A2	825377	1.92236e+06	582142	352265	1.4807e+06	190116
P31689-1	High	DnaJ homolog subfamily A member 1 [OS=Homo sapiens]	4	DNAJA1	115563	840471	316252	49321.4	647372	103281
P31930	High	Cytochrome b-c1 complex subunit 1, mitochondrial [OS=Homo sapiens]	23	UQCRC1	6.4383e+07	4.85773e+07	3.19385e+07	2.74782e+07	3.74167e+07	1.04305e+07
P31937	High	3-hydroxyisobutyrate dehydrogenase, mitochondrial [OS=Homo sapiens]	12	HIBADH	8.14126e+06	7.67796e+06	7.78416e+06	3.47463e+06	5.91394e+06	2.54215e+06
P31944	High	Caspase-14 [OS=Homo sapiens]	5	CASP14	319988	239021	569266	136569	184106	185911
P31946	High	14-3-3 protein beta/alpha [OS=Homo sapiens]	5	YWHAB	3.11405e+06	1.72787e+06	5.97306e+06	1.32905e+06	1.33089e+06	1.95068e+06
P31949	High	protein S100-A11 [OS=Homo sapiens]	2	S100A11	456531	391664	755293	194844	301679	246663
P32004	High	Neural cell adhesion molecule L1 [OS=Homo sapiens]	14	L1CAM	758912	1.41111e+06	448769	323898	1.0869e+06	146559
P32189-3	High	glycerol kinase [OS=Homo sapiens]	11	GK	1.14779e+06	905654	2.18703e+06	489867	697579	714238
P32418-2	High	Isoform 3 of Sodium/calcium exchanger 1 [OS=Homo sapiens]	5	SLC8A1	246803	506219	168463	105334	389915	55016.7
P32856	High	Syntaxin-2 [OS=Homo sapiens]	2	STX2	18737.9	91991.1	73516.8	7997.18	70856.1	24009.1
P32969	High	60S ribosomal protein L9 [OS=Homo sapiens]	6	RPL9	1.31753e+06	1.11234e+06	1.43462e+06	562311	856779	468517
P33176	High	Kinesin-1 heavy chain [OS=Homo sapiens]	2	KIF5B	49024.5	57725.2	95928.6	20923.3	44462.8	31328.3
P33316-3	High	Deoxyuridine 5'-triphosphate nucleotidohydrolase, mitochondrial [OS=Homo sapiens]	5	DUT	312166	515653	556660	133230	397181	181794
P33908	High	Mannosyl-oligosaccharide 1,2-alpha-mannosidase IA [OS=Homo sapiens]	5	MAN1A1	358695	274341	336442	153088	211311	109875
P33947-1	High	ER lumen protein-retaining receptor 2 [OS=Homo sapiens]	1	KDELR2	761908	584029	842362	325176	449848	275098
P34096	High	Ribonuclease 4 [OS=Homo sapiens]	1	RNASE4	44738.6	22110.3	37905.5	19094.1	17030.4	12379.2
P34810	High	Macrosialin [OS=Homo sapiens]	1	CD68	104587	63122.1	103601	44636.7	48619.7	33834
P34897-1	High	Serine hydroxymethyltransferase, mitochondrial [OS=Homo sapiens]	10	SHMT2	1.40882e+06	1.9242e+06	2.59332e+06	601272	1.48212e+06	846927
P34913-1	High	Bifunctional epoxide hydrolase 2 [OS=Homo sapiens]	15	EPHX2	1.45119e+06	1.39509e+06	1.6628e+06	619355	1.07457e+06	543037
P34932	High	Heat shock 70 kDa protein 4 [OS=Homo sapiens]	9	HSPA4	767511	342302	837442	327568	263658	273492
P35221	High	Catenin alpha-1 [OS=Homo sapiens]	40	CTNNA1	4.09137e+06	1.89737e+07	5.1787e+06	1.74617e+06	1.46145e+07	1.69126e+06
P35222	High	Catenin beta-1 [OS=Homo sapiens]	22	CTNNB1	2.04864e+06	8.29803e+06	2.94251e+06	874346	6.39155e+06	960963
P35232	High	Prohibitin [OS=Homo sapiens]	1	PHB	512787	300562	161616	218854	231508	52780.6
P35237	High	serpin B6 [OS=Homo sapiens]	9	SERPINB6	1.37761e+06	825357	2.37573e+06	587953	635731	775865
P35241-1	High	radixin [OS=Homo sapiens]	10	RDX	1.12009e+06	4.99536e+06	2.06296e+06	478045	3.84767e+06	673721
P35270	High	Sepiapterin reductase [OS=Homo sapiens]	5	SPR	683287	451052	698432	291622	347422	228094
P35527	High	Keratin, type I cytoskeletal 9 [OS=Homo sapiens]	38	KRT9	5.30404e+08	4.04197e+08	6.84762e+08	2.26372e+08	3.11333e+08	2.23629e+08
P35555	High	Fibrillin-1 [OS=Homo sapiens]	27	FBN1	1.52353e+06	769959	5.61921e+06	650229	593060	1.83512e+06
P35558	High	phosphoenolpyruvate carboxykinase, cytosolic [GTP] [OS=Homo sapiens]	14	PCK1	1.58578e+06	1.60188e+06	3.1243e+06	676799	1.23385e+06	1.02033e+06
P35579-1	High	Myosin-9 [OS=Homo sapiens]	54	MYH9	2.78573e+07	1.12146e+07	2.14042e+07	1.18893e+07	8.63802e+06	6.99019e+06
P35580	High	Myosin-10 [OS=Homo sapiens]	11	MYH10	1.79988e+06	413929	1.04113e+06	768175	318828	340012
P35606	High	Coatomer subunit beta' [OS=Homo sapiens]	9	COPB2	386214	685353	672131	164833	527892	219504
P35625	High	Metalloproteinase inhibitor 3 [OS=Homo sapiens]	3	TIMP3	154269	149727	367840	65840.9	115327	120129
P35749	High	Myosin-11 [OS=Homo sapiens]	7	MYH11	320251	18814	-	136681	14491.4	-
P35754	High	Glutaredoxin-1 [OS=Homo sapiens]	2	GLRX	204298	98426.2	335562	87192.9	75812.8	109588
P35813	High	Protein phosphatase 1A [OS=Homo sapiens]	3	PPM1A	148084	45949	196760	63201	35392.2	64257.7
P35908	High	Keratin, type II cytoskeletal 2 epidermal [OS=Homo sapiens]	38	KRT2	4.53238e+08	4.38796e+08	6.55358e+08	1.93439e+08	3.37982e+08	2.14027e+08
P35914	High	Hydroxymethylglutaryl-CoA lyase, mitochondrial [OS=Homo sapiens]	10	HMGCL	4.39324e+06	3.12878e+06	4.06134e+06	1.875e+06	2.40994e+06	1.32635e+06
P35998	High	26S proteasome regulatory subunit 7 [OS=Homo sapiens]	2	PSMC2	88936.2	49789.9	110066	37957.3	38350.6	35945.2
P36222	High	Chitinase-3-like protein 1 [OS=Homo sapiens]	3	CHI3L1	22286.6	60997.8	-	9511.75	46983.6	-
P36269-1	High	glutathione hydrolase 5 proenzyme [OS=Homo sapiens]	16	GGT5	7.711e+06	7.8805e+06	4.67812e+06	3.291e+06	6.06995e+06	1.52778e+06
P36382	High	Gap junction alpha-5 protein [OS=Homo sapiens]	3	GJA5; LOC101060613	361549	221147	233328	154306	170338	76200.2
P36543	High	V-type proton ATPase subunit E 1 [OS=Homo sapiens]	11	ATP6V1E1	4.2557e+06	1.99931e+06	1.91623e+06	1.8163e+06	1.53997e+06	625802
P36551	High	Oxygen-dependent coproporphyrinogen-III oxidase, mitochondrial [OS=Homo sapiens]	1	CPOX	17549.4	36684.6	29051.4	7489.94	28256.3	9487.61
P36578	High	60S ribosomal protein L4 [OS=Homo sapiens]	7	RPL4	962878	658591	857648	410949	507280	280091
P36871-1	High	Phosphoglucomutase-1 [OS=Homo sapiens]	11	PGM1	1.43028e+06	585922	1.74518e+06	610435	451306	569941
P36957	High	Dihydrolipoyllysine-residue succinyltransferase component of 2-oxoglutarate dehydrogenase complex, mitochondrial [OS=Homo sapiens]	10	DLST	1.02333e+07	1.38366e+07	6.55925e+06	4.36752e+06	1.06576e+07	2.14212e+06
P37108	High	Signal recognition particle 14 kDa protein [OS=Homo sapiens]	4	SRP14	277020	614734	484898	118230	473499	158358
P37173-1	High	TGF-beta receptor type-2 [OS=Homo sapiens]	2	TGFBR2	201674	273223	175416	86073.2	210450	57287.2
P37235	High	Hippocalcin-like protein 1 [OS=Homo sapiens]	4	HPCAL1	1.3529e+06	866479	1.26794e+06	577409	667405	414084
P37837	High	Transaldolase [OS=Homo sapiens]	7	TALDO1	1.58011e+06	318362	2.40919e+06	674377	245218	786792
P38117	High	electron transfer flavoprotein subunit beta [OS=Homo sapiens]	15	ETFB	7.18474e+06	5.78098e+06	5.33039e+06	3.0664e+06	4.4528e+06	1.7408e+06
P38606	High	V-type proton ATPase catalytic subunit A [OS=Homo sapiens]	23	ATP6V1A	9.33271e+06	5.72373e+06	5.18322e+06	3.98313e+06	4.4087e+06	1.69273e+06
P38919	High	Eukaryotic initiation factor 4A-III [OS=Homo sapiens]	3	EIF4A3	147388	216280	135254	62903.9	166590	44171.4
P39019	High	40S ribosomal protein S19 [OS=Homo sapiens]	2	RPS19	558789	153356	429100	238487	118122	140135
P39023	High	60S ribosomal protein L3 [OS=Homo sapiens]	5	RPL3	584053	282294	419885	249269	217437	137126
P39656	High	Dolichyl-diphosphooligosaccharide--protein glycosyltransferase 48 kDa subunit [OS=Homo sapiens]	12	DDOST	1.08749e+07	1.12291e+07	8.50016e+06	4.64134e+06	8.64919e+06	2.77598e+06
P40121	High	Macrophage-capping protein [OS=Homo sapiens]	3	CAPG	567639	408989	205922	242264	315024	67250
P40189-1	High	Interleukin-6 receptor subunit beta [OS=Homo sapiens]	1	IL6ST	2.2402e+06	1.59836e+06	2.76349e+06	956101	1.23114e+06	902501
P40306	High	Proteasome subunit beta type-10 [OS=Homo sapiens]	1	PSMB10	63660.3	22461	160951	27169.8	17300.6	52563.2
P40763	High	Signal transducer and activator of transcription 3 [OS=Homo sapiens]	2	STAT3	-	48637.9	35949	-	37463.3	11740.2
P40925	High	Malate dehydrogenase, cytoplasmic [OS=Homo sapiens]	9	MDH1	8.52711e+06	2.7496e+06	1.10432e+07	3.63931e+06	2.11788e+06	3.60647e+06
P40939	High	Trifunctional enzyme subunit alpha, mitochondrial [OS=Homo sapiens]	32	HADHA	7.76475e+07	4.4229e+07	3.45761e+07	3.31394e+07	3.40674e+07	1.12918e+07
P41091	High	eukaryotic translation initiation factor 2 subunit 3 [OS=Homo sapiens]	3	EIF2S3	206895	174477	290686	88301.2	134391	94932.2
P41180	High	Extracellular calcium-sensing receptor [OS=Homo sapiens]	3	CASR	356688	194219	21794	152232	149597	7117.48
P41181	High	aquaporin-2 [OS=Homo sapiens]	2	AQP2	339741	115775	149421	144999	89175.6	48798
P42025	High	Beta-centractin [OS=Homo sapiens]	1	ACTR1B	71865.4	58592.5	120705	30671.6	45130.8	39419.8
P42126	High	Enoyl-CoA delta isomerase 1, mitochondrial [OS=Homo sapiens]	9	ECI1	9.83628e+06	7.05725e+06	7.50074e+06	4.19805e+06	5.43584e+06	2.44959e+06
P42224-1	High	Signal transducer and activator of transcription 1-alpha/beta [OS=Homo sapiens]	1	STAT1	27534.8	-	73094.3	11751.6	-	23871.1
P42356	High	phosphatidylinositol 4-kinase alpha [OS=Homo sapiens]	5	PI4KA	134304	215650	141136	57319.8	166105	46092.3
P42704	High	Leucine-rich PPR motif-containing protein, mitochondrial [OS=Homo sapiens]	57	LRPPRC	1.44439e+07	9.11054e+06	1.22433e+07	6.16454e+06	7.01738e+06	3.99843e+06
P42765	High	3-ketoacyl-CoA thiolase, mitochondrial [OS=Homo sapiens]	20	ACAA2	1.35401e+07	1.54956e+07	1.49187e+07	5.77882e+06	1.19355e+07	4.87214e+06
P42766	High	60S ribosomal protein L35 [OS=Homo sapiens]	1	RPL35	129526	118215	65749.6	55280.8	91054.7	21472.5
P42892	High	Endothelin-converting enzyme 1 [OS=Homo sapiens]	8	ECE1	867386	894462	949100	370194	688959	309957
P43005	High	Excitatory amino acid transporter 3 [OS=Homo sapiens]	2	SLC1A1	41634.5	43742.5	-	17769.3	33692.6	-
P43034	High	Platelet-activating factor acetylhydrolase IB subunit alpha [OS=Homo sapiens]	3	PAFAH1B1	127451	78345.2	186270	54395.3	60345.3	60831.9
P43155	High	Carnitine O-acetyltransferase [OS=Homo sapiens]	6	CRAT	696386	431150	683825	297212	332093	223323
P43304	High	Glycerol-3-phosphate dehydrogenase, mitochondrial [OS=Homo sapiens]	24	GPD2	7.81889e+06	6.14357e+06	4.81765e+06	3.33704e+06	4.73208e+06	1.57335e+06
P43307	High	Translocon-associated protein subunit alpha [OS=Homo sapiens]	5	SSR1	3.91896e+06	2.81025e+06	3.56571e+06	1.67258e+06	2.1646e+06	1.16449e+06
P43490	High	nicotinamide phosphoribosyltransferase [OS=Homo sapiens]	7	NAMPT	137031	25639.2	497237	58483.7	19748.6	162387
P45381	High	aspartoacylase [OS=Homo sapiens]	1	ASPA	79184.5	39265	127161	33795.3	30243.8	41528.2
P45954	High	Short/branched chain specific acyl-CoA dehydrogenase, mitochondrial [OS=Homo sapiens]	17	ACADSB	5.57751e+06	5.17773e+06	6.14498e+06	2.38044e+06	3.98815e+06	2.00683e+06
P45974-1	High	Ubiquitin carboxyl-terminal hydrolase 5 [OS=Homo sapiens]	2	USP5	52881.8	8957.69	58597.4	22569.5	6899.66	19136.7
P46087	High	Probable 28S rRNA (cytosine(4447)-C(5))-methyltransferase [OS=Homo sapiens]	2	NOP2	23639.8	47209.7	-	10089.3	36363.2	-
P46777	High	60S ribosomal protein L5 [OS=Homo sapiens]	4	RPL5	449014	382809	707392	191636	294859	231020
P46783	High	40S ribosomal protein S10 [OS=Homo sapiens]	3	RPS10	1.06119e+06	404034	1.43422e+06	452909	311207	468387
P46926	High	glucosamine-6-phosphate isomerase 1 [OS=Homo sapiens]	9	GNPDA1	1.72653e+06	572540	2.19818e+06	736872	440999	717882
P46939	High	Utrophin [OS=Homo sapiens]	17	UTRN	158829	1.31307e+06	766048	67787	1.01139e+06	250176
P46952	High	3-hydroxyanthranilate 3,4-dioxygenase [OS=Homo sapiens]	6	HAAO	405180	93876.7	526577	172928	72308.5	171969
P46977	High	Dolichyl-diphosphooligosaccharide--protein glycosyltransferase subunit STT3A [OS=Homo sapiens]	10	STT3A	5.88685e+06	7.47871e+06	5.38543e+06	2.51247e+06	5.76047e+06	1.75877e+06
P47755	High	F-actin-capping protein subunit alpha-2 [OS=Homo sapiens]	5	CAPZA2	528765	724130	1.09785e+06	225673	557761	358536
P47813	High	Eukaryotic translation initiation factor 1A, X-chromosomal [OS=Homo sapiens]	1	EIF1AX; LOC101060318; LOC107984923	29596.8	24650.2	60257.3	12631.7	18986.8	19678.8
P47929	High	galectin-7 [OS=Homo sapiens]	1	LGALS7; LGALS7B	36056.6	18079.7	45867.1	15388.7	13925.9	14979.2
P47985	High	cytochrome b-c1 complex subunit Rieske, mitochondrial [OS=Homo sapiens]	9	UQCRFS1	2.00604e+07	1.09735e+07	8.76477e+06	8.56164e+06	8.45232e+06	2.8624e+06
P48047	High	ATP synthase subunit O, mitochondrial [OS=Homo sapiens]	13	ATP5O	7.2794e+07	4.79663e+07	3.25191e+07	3.10679e+07	3.6946e+07	1.06201e+07
P48426	High	phosphatidylinositol 5-phosphate 4-kinase type-2 alpha [OS=Homo sapiens]	1	PIP4K2A	50852.3	45535.8	53116.6	21703.4	35073.9	17346.8
P48444	High	Coatomer subunit delta [OS=Homo sapiens]	3	ARCN1	401769	176063	417087	171472	135612	136212
P48449-1	High	lanosterol synthase [OS=Homo sapiens]	9	LSS	723174	601473	363885	308645	463284	118837
P48637	High	glutathione synthetase [OS=Homo sapiens]	7	GSS	986013	494693	1.44336e+06	420823	381037	471373
P48723	High	Heat shock 70 kDa protein 13 [OS=Homo sapiens]	2	HSPA13	85350.4	142930	119044	36426.9	110092	38877.3
P48739	High	Phosphatidylinositol transfer protein beta isoform [OS=Homo sapiens]	2	PITPNB	225563	19740.7	158473	96268.5	15205.3	51754
P48960-1	High	CD97 antigen [OS=Homo sapiens]	6	CD97; ADGRE5	423825	379449	536475	180885	292271	175202
P49411	High	elongation factor Tu, mitochondrial [OS=Homo sapiens]	24	TUFM	8.02289e+06	1.1728e+07	6.25356e+06	3.42411e+06	9.03349e+06	2.04229e+06
P49419-2	High	Isoform 2 of Alpha-aminoadipic semialdehyde dehydrogenase [OS=Homo sapiens]	24	ALDH7A1	1.52032e+07	1.6212e+07	2.16415e+07	6.48859e+06	1.24873e+07	7.06766e+06
P49448	High	Glutamate dehydrogenase 2, mitochondrial [OS=Homo sapiens]	2	GLUD2	70413.1	93184.5	121186	30051.8	71775.3	39576.8
P49458	High	Signal recognition particle 9 kDa protein [OS=Homo sapiens]	2	SRP9; SRP9P1	219218	307479	434391	93560.5	236836	141863
P49585	High	choline-phosphate cytidylyltransferase A [OS=Homo sapiens]	5	PCYT1A	94419.6	625786	212413	40297.6	482011	69369.9
P49588	High	Alanine--tRNA ligase, cytoplasmic [OS=Homo sapiens]	4	AARS	210435	55380.2	270281	89812.2	42656.6	88268.2
P49720	High	proteasome subunit beta type-3 [OS=Homo sapiens]	3	PSMB3	309021	111203	342728	131888	85654.4	111928
P49721	High	proteasome subunit beta type-2 [OS=Homo sapiens]	3	PSMB2	1.01794e+06	315783	1.22553e+06	434448	243232	400232
P49748-1	High	Very long-chain specific acyl-CoA dehydrogenase, mitochondrial [OS=Homo sapiens]	34	ACADVL	2.10664e+07	2.98426e+07	2.48314e+07	8.99099e+06	2.29862e+07	8.10944e+06
P49755	High	Transmembrane emp24 domain-containing protein 10 [OS=Homo sapiens]	8	TMED10	1.10204e+07	1.07624e+07	8.35494e+06	4.70343e+06	8.28975e+06	2.72855e+06
P49773	High	Histidine triad nucleotide-binding protein 1 [OS=Homo sapiens]	3	HINT1	409068	107662	574118	174587	82926.3	187495
P49862	High	Kallikrein-7 [OS=Homo sapiens]	2	KLK7	21886.1	35842.3	29430.1	9340.84	27607.5	9611.27
P49913	High	cathelicidin antimicrobial peptide [OS=Homo sapiens]	5	CAMP	194164	155792	85560.6	82867.8	119999	27942.3
P49961	High	Ectonucleoside triphosphate diphosphohydrolase 1 [OS=Homo sapiens]	6	ENTPD1	519192	357369	437120	221587	275264	142755
P50053	High	Ketohexokinase [OS=Homo sapiens]	6	KHK	4.01493e+06	1.43353e+06	6.33518e+06	1.71354e+06	1.10418e+06	2.06894e+06
P50135	High	Histamine N-methyltransferase [OS=Homo sapiens]	2	HNMT	165322	19657.7	121287	70558.2	15141.4	39609.9
P50148	High	Guanine nucleotide-binding protein G(Q) subunit alpha [OS=Homo sapiens]	9	GNAQ	1.84263e+06	4.02068e+06	2.92063e+06	786421	3.09693e+06	953818
P50225	High	Sulfotransferase 1A1 [OS=Homo sapiens]	2	SULT1A1	-	27305.6	50925.3	-	21032.1	16631.2
P50402	High	Emerin [OS=Homo sapiens]	6	EMD	1.23918e+06	1.71808e+06	1.02294e+06	528871	1.32335e+06	334070
P50440-2	High	Isoform 2 of Glycine amidinotransferase, mitochondrial [OS=Homo sapiens]	25	GATM	4.19376e+07	3.18684e+07	6.21343e+07	1.78987e+07	2.45466e+07	2.02918e+07
P50454	High	Serpin H1 [OS=Homo sapiens]	17	SERPINH1	2.28191e+06	9.16502e+06	5.18478e+06	973904	7.05935e+06	1.69325e+06
P50851-1	High	Lipopolysaccharide-responsive and beige-like anchor protein [OS=Homo sapiens]	4	LRBA	487170	72263.7	242798	207921	55661.1	79292.8
P50897	High	Palmitoyl-protein thioesterase 1 [OS=Homo sapiens]	4	PPT1	635443	961730	943119	271202	740772	308004
P50990	High	T-complex protein 1 subunit theta [OS=Homo sapiens]	18	CCT8	3.75825e+06	1.8096e+06	4.51777e+06	1.60399e+06	1.39385e+06	1.47541e+06
P50991	High	T-complex protein 1 subunit delta [OS=Homo sapiens]	13	CCT4	3.02344e+06	1.09006e+06	2.94154e+06	1.29038e+06	839618	960648
P50995	High	annexin A11 [OS=Homo sapiens]	12	ANXA11	2.74181e+06	3.41856e+06	2.13577e+06	1.17018e+06	2.63314e+06	697498
P51148	High	Ras-related protein Rab-5C [OS=Homo sapiens]	8	RAB5C	2.32334e+06	1.19478e+07	3.85764e+06	991584	9.20276e+06	1.25983e+06
P51149	High	ras-related protein Rab-7a [OS=Homo sapiens]	15	RAB7A	2.84919e+06	1.38075e+07	4.63552e+06	1.21601e+06	1.06352e+07	1.51387e+06
P51151	High	Ras-related protein Rab-9A [OS=Homo sapiens]	2	RAB9A	-	69814.3	14880.7	-	53774.4	4859.73
P51398-1	High	28S ribosomal protein S29, mitochondrial [OS=Homo sapiens]	4	DAP3	392576	201419	95478.1	167548	155143	31181.2
P51571	High	translocon-associated protein subunit delta [OS=Homo sapiens]	5	SSR4	1.00289e+07	6.79761e+06	6.32952e+06	4.28025e+06	5.23585e+06	2.06709e+06
P51636-1	High	Caveolin-2 [OS=Homo sapiens]	1	CAV2	184117	72087.3	160270	78579.6	55525.2	52340.9
P51648	High	Fatty aldehyde dehydrogenase [OS=Homo sapiens]	15	ALDH3A2	9.20017e+06	1.28977e+07	6.77591e+06	3.92656e+06	9.93447e+06	2.21288e+06
P51687	High	Sulfite oxidase, mitochondrial [OS=Homo sapiens]	10	SUOX	916569	906291	1.85785e+06	391185	698070	606737
P51689	High	Arylsulfatase D [OS=Homo sapiens]	2	ARSD	277044	135857	152261	118240	104644	49725.2
P51795	Medium	H(+)/Cl(-) exchange transporter 5 [OS=Homo sapiens]	1	CLCN5	511524	194289	595087	218314	149651	194343
P51801-2	High	Isoform 2 of Chloride channel protein ClC-Kb [OS=Homo sapiens]	1	CLCNKB	49766.5	48876.4	26069.6	21240	37647	8513.81
P51809	High	vesicle-associated membrane protein 7 [OS=Homo sapiens]	5	VAMP7	80508.7	633228	134404	34360.5	487743	43893.6
P51884	High	Lumican [OS=Homo sapiens]	7	LUM	500900	392208	484760	213780	302098	158313
P51888	High	prolargin [OS=Homo sapiens]	2	PRELP	84420.6	87290.6	55465.2	36030.1	67235.5	18113.8
P51911	High	Calponin-1 [OS=Homo sapiens]	2	CNN1	42318.9	17098.1	54990.9	18061.4	13169.8	17958.9
P51970	High	NADH dehydrogenase [ubiquinone] 1 alpha subcomplex subunit 8 [OS=Homo sapiens]	6	NDUFA8	9.48006e+06	6.36614e+06	3.49266e+06	4.04602e+06	4.90352e+06	1.14063e+06
P51991-1	High	Heterogeneous nuclear ribonucleoprotein A3 [OS=Homo sapiens]	4	HNRNPA3	272802	954632	484760	116430	735305	158313
P52209	High	6-phosphogluconate dehydrogenase, decarboxylating [OS=Homo sapiens]	6	PGD	748011	286721	1.18578e+06	319246	220847	387251
P52565-1	High	rho GDP-dissociation inhibitor 1 [OS=Homo sapiens]	2	ARHGDIA	441490	224055	658272	188425	172578	214978
P52566	High	Rho GDP-dissociation inhibitor 2 [OS=Homo sapiens]	4	ARHGDIB	293038	279071	651273	125066	214954	212692
P52597	High	Heterogeneous nuclear ribonucleoprotein F [OS=Homo sapiens]	4	HNRNPF	399595	374480	457357	170544	288443	149364
P52735	High	Guanine nucleotide exchange factor VAV2 [OS=Homo sapiens]	2	VAV2	126391	-	121671	53942.5	-	39735.2
P52758	High	2-iminobutanoate/2-iminopropanoate deaminase [OS=Homo sapiens]	5	HRSP12; RIDA	6.37773e+06	2.91691e+06	7.89362e+06	2.72197e+06	2.24675e+06	2.5779e+06
P52943	High	Cysteine-rich protein 2 [OS=Homo sapiens]	3	CRIP2	189829	279942	499259	81017.5	215625	163048
P53004	High	Biliverdin reductase A [OS=Homo sapiens]	2	BLVRA	33273.3	-	59629.2	14200.8	-	19473.7
P53396-1	High	ATP-citrate synthase [OS=Homo sapiens]	4	ACLY	257278	87553.3	359603	109804	67437.9	117439
P53420	High	Collagen alpha-4(IV) chain [OS=Homo sapiens]	5	COL4A4	527690	171756	752394	225214	132295	245717
P53597	High	Succinate--CoA ligase [ADP/GDP-forming] subunit alpha, mitochondrial [OS=Homo sapiens]	8	SUCLG1	9.40414e+06	7.25924e+06	7.35862e+06	4.01362e+06	5.59142e+06	2.40317e+06
P53618	High	Coatomer subunit beta [OS=Homo sapiens]	10	COPB1	886125	448493	861588	378192	345452	281377
P53621-1	High	coatomer subunit alpha [OS=Homo sapiens]	21	COPA	2.68176e+06	1.75212e+06	2.23632e+06	1.14456e+06	1.34957e+06	730337
P53634-1	High	Dipeptidyl peptidase 1 [OS=Homo sapiens]	5	CTSC	669520	382331	611417	285746	294490	199676
P53701	High	Cytochrome c-type heme lyase [OS=Homo sapiens]	6	HCCS	464132	412452	286872	198088	317691	93686.6
P53794	High	sodium/myo-inositol cotransporter [OS=Homo sapiens]	2	SLC5A3	21086.6	152488	-	8999.6	117453	-
P54136-1	High	arginine--tRNA ligase, cytoplasmic [OS=Homo sapiens]	8	RARS	562577	406719	825202	240104	313275	269494
P54577	High	Tyrosine--tRNA ligase, cytoplasmic [OS=Homo sapiens]	1	YARS	34615.1	8364.38	51364.9	14773.5	6442.66	16774.7
P54652	High	Heat shock-related 70 kDa protein 2 [OS=Homo sapiens]	3	HSPA2	217115	115935	110872	92662.9	89299	36208.6
P54709	High	sodium/potassium-transporting ATPase subunit beta-3 [OS=Homo sapiens]	5	ATP1B3	1.82422e+06	2.14945e+06	2.16477e+06	778562	1.65561e+06	706969
P54710-1	High	sodium/potassium-transporting ATPase subunit gamma [OS=Homo sapiens]	1	FXYD2	179359	2.12084e+06	538600	76549.1	1.63358e+06	175896
P54710-2	High	Isoform 2 of Sodium/potassium-transporting ATPase subunit gamma [OS=Homo sapiens]	1	FXYD2	2.99403e+06	2.21609e+06	1.11251e+06	1.27783e+06	1.70694e+06	363323
P54764	High	Ephrin type-A receptor 4 [OS=Homo sapiens]	1	EPHA4	18806.5	22996.9	-	8026.49	17713.4	-
P54793	High	arylsulfatase F [OS=Homo sapiens]	1	ARSF	67123.2	81201.6	29537.7	28647.7	62545.5	9646.41
P54819	High	Adenylate kinase 2, mitochondrial [OS=Homo sapiens]	12	AK2	8.7082e+06	7.26697e+06	8.43821e+06	3.7166e+06	5.59738e+06	2.75575e+06
P54868-1	High	Hydroxymethylglutaryl-CoA synthase, mitochondrial [OS=Homo sapiens]	15	HMGCS2	5.65847e+06	3.48677e+06	2.3919e+06	2.41499e+06	2.68569e+06	781147
P54886	High	delta-1-pyrroline-5-carboxylate synthase [OS=Homo sapiens]	5	ALDH18A1	163586	231011	193860	69817.4	177936	63310.7
P54920	High	alpha-soluble nsf attachment protein [OS=Homo sapiens]	16	NAPA	5.00203e+06	5.2702e+06	6.54987e+06	2.13483e+06	4.05937e+06	2.13906e+06
P55060-1	High	Exportin-2 [OS=Homo sapiens]	5	CSE1L	257703	81077.7	316596	109986	62450.1	103394
P55072	High	Transitional endoplasmic reticulum ATPase [OS=Homo sapiens]	33	VCP	1.36526e+07	9.92122e+06	1.56783e+07	5.82683e+06	7.64181e+06	5.12022e+06
P55083	High	Microfibril-associated glycoprotein 4 [OS=Homo sapiens]	6	MFAP4	449395	416081	247095	191798	320486	80696.2
P55084	High	Trifunctional enzyme subunit beta, mitochondrial [OS=Homo sapiens]	23	HADHB	3.44647e+07	2.37572e+07	1.7635e+07	1.47093e+07	1.8299e+07	5.75923e+06
P55145	High	Mesencephalic astrocyte-derived neurotrophic factor [OS=Homo sapiens]	5	MANF	287332	428379	384548	122631	329958	125586
P55268	High	laminin subunit beta-2 [OS=Homo sapiens]	30	LAMB2	9.93166e+06	4.65513e+06	1.75972e+07	4.23876e+06	3.58561e+06	5.74688e+06
P55290	High	cadherin-13 [OS=Homo sapiens]	4	CDH13	264848	1.43282e+06	306367	113035	1.10363e+06	100053
P55327	High	Tumor protein D52 [OS=Homo sapiens]	3	TPD52	-	56202.1	24080.4	-	43289.7	7864.18
P55769	High	NHP2-like protein 1 [OS=Homo sapiens]	1	NHP2L1; SNU13	43606	147691	87743.5	18610.7	113759	28655.2
P55795	High	heterogeneous nuclear ribonucleoprotein H2 [OS=Homo sapiens]	4	HNRNPH2	236843	565958	308949	101083	435929	100897
P55809	High	Succinyl-CoA:3-ketoacid coenzyme A transferase 1, mitochondrial [OS=Homo sapiens]	13	OXCT1	3.13361e+06	2.62581e+06	2.56708e+06	1.3374e+06	2.02253e+06	838355
P55899	High	IgG receptor FcRn large subunit p51 [OS=Homo sapiens]	6	FCGRT	1.1309e+06	2.21204e+06	1.86982e+06	482662	1.70382e+06	610645
P56181	High	NADH dehydrogenase [ubiquinone] flavoprotein 3, mitochondrial [OS=Homo sapiens]	1	NDUFV3	102486	81837.8	43192.3	43740.4	63035.5	14105.7
P56192	High	Methionine--tRNA ligase, cytoplasmic [OS=Homo sapiens]	5	MARS	122149	158321	247596	52132.1	121946	80859.8
P56199	High	Integrin alpha-1 [OS=Homo sapiens]	38	ITGA1	5.89794e+07	8.23612e+07	6.86843e+07	2.5172e+07	6.34386e+07	2.24309e+07
P56385	High	ATP synthase subunit e, mitochondrial [OS=Homo sapiens]	5	ATP5I	1.2375e+07	5.6159e+06	5.85532e+06	5.28156e+06	4.32564e+06	1.91223e+06
P56537-1	High	eukaryotic translation initiation factor 6 [OS=Homo sapiens]	4	EIF6	264522	92390.7	374826	112896	71163.9	122411
P56556	High	NADH dehydrogenase [ubiquinone] 1 alpha subcomplex subunit 6 [OS=Homo sapiens]	5	NDUFA6	4.24475e+06	2.23013e+06	1.7849e+06	1.81163e+06	1.71776e+06	582912
P57087-1	High	Junctional adhesion molecule B [OS=Homo sapiens]	6	JAM2	444200	637251	761034	189581	490842	248538
P57105	High	Synaptojanin-2-binding protein [OS=Homo sapiens]	9	SYNJ2BP	2.48855e+06	3.83134e+06	2.05149e+06	1.06209e+06	2.95109e+06	669975
P57740	High	Nuclear pore complex protein Nup107 [OS=Homo sapiens]	5	NUP107	-	328538	58378.3	-	253056	19065.2
P58107	High	epiplakin [OS=Homo sapiens]	4	EPPK1	55592.2	-	50461.9	23726.3	-	16479.8
P59665	High	Neutrophil defensin 1 [OS=Homo sapiens]	2	DEFA1; DEFA1B	2.48285e+06	1.75817e+06	1.18926e+06	1.05966e+06	1.35423e+06	388387
P59768	High	Guanine nucleotide-binding protein G(I)/G(S)/G(O) subunit gamma-2 [OS=Homo sapiens]	2	GNG2	115368	144773	202770	49238.3	111512	66220.6
P59998	High	Actin-related protein 2/3 complex subunit 4 [OS=Homo sapiens]	6	ARPC4	2.16328e+06	1.60318e+06	3.78969e+06	923270	1.23485e+06	1.23764e+06
P60059	High	Protein transport protein Sec61 subunit gamma [OS=Homo sapiens]	2	SEC61G	558688	517542	621646	238444	398637	203017
P60174-1	High	Isoform 2 of Triosephosphate isomerase [OS=Homo sapiens]	16	TPI1	3.40417e+07	1.14158e+07	4.28463e+07	1.45287e+07	8.793e+06	1.39927e+07
P60468	High	protein transport protein Sec61 subunit beta [OS=Homo sapiens]	3	SEC61B	781826	1.55293e+06	1.02965e+06	333678	1.19614e+06	336264
P60602-1	High	Reactive oxygen species modulator 1 [OS=Homo sapiens]	1	ROMO1	129788	170830	121899	55392.8	131582	39809.9
P60866	High	40S ribosomal protein S20 [OS=Homo sapiens]	1	RPS20	100396	21681.6	99437.3	42848.4	16700.2	32474.2
P60891	High	ribose-phosphate pyrophosphokinase 1 [OS=Homo sapiens]	2	PRPS1	144746	52984.8	184224	61776.5	40811.5	60163.8
P60900	High	Proteasome subunit alpha type-6 [OS=Homo sapiens]	9	PSMA6	2.10987e+06	800977	2.61239e+06	900475	616952	853154
P60903	High	Protein S100-A10 [OS=Homo sapiens]	4	S100A10	563109	2.5395e+06	468482	240331	1.95605e+06	152997
P60953	High	Cell division control protein 42 homolog [OS=Homo sapiens]	8	CDC42	9.90395e+06	8.07203e+06	1.0127e+07	4.22693e+06	6.21748e+06	3.30728e+06
P61006	High	Ras-related protein Rab-8A [OS=Homo sapiens]	3	RAB8A	229385	1.14018e+06	350289	97899.7	878227	114397
P61019-1	High	Ras-related protein Rab-2A [OS=Homo sapiens]	6	RAB2A	2.18999e+06	1.43542e+07	3.95141e+06	934670	1.10563e+07	1.29045e+06
P61026	High	ras-related protein rab-10 [OS=Homo sapiens]	7	RAB10	2.08766e+06	4.43805e+06	2.36303e+06	890998	3.41841e+06	771716
P61088	High	ubiquitin-conjugating enzyme E2 N [OS=Homo sapiens]	3	UBE2N	386006	279106	609609	164745	214981	199086
P61106	High	Ras-related protein Rab-14 [OS=Homo sapiens]	9	RAB14	835346	6.80535e+06	1.45888e+06	356519	5.24181e+06	476442
P61158	High	actin-related protein 3 [OS=Homo sapiens]	12	ACTR3	3.35746e+06	3.27756e+06	5.83819e+06	1.43294e+06	2.52454e+06	1.90663e+06
P61160-1	High	Actin-related protein 2 [OS=Homo sapiens]	10	ACTR2	2.51313e+06	2.15802e+06	3.69713e+06	1.07259e+06	1.66221e+06	1.20741e+06
P61204	High	ADP-ribosylation factor 3 [OS=Homo sapiens]	4	ARF3	6.02376e+06	2.64698e+06	6.02267e+06	2.5709e+06	2.03884e+06	1.96688e+06
P61224-1	High	Ras-related protein Rap-1b [OS=Homo sapiens]	2	RAP1B	1.15131e+07	1.79457e+07	1.34554e+07	4.91372e+06	1.38227e+07	4.39425e+06
P61326	High	Protein mago nashi homolog [OS=Homo sapiens]	1	MAGOH	171870	153508	228712	73352.8	118239	74692.8
P61586	High	Transforming protein RhoA [OS=Homo sapiens]	7	RHOA	3.73266e+06	3.62022e+06	4.65036e+06	1.59307e+06	2.78847e+06	1.51871e+06
P61601	High	Neurocalcin-delta [OS=Homo sapiens]	1	NCALD	125127	55499.3	116541	53403.4	42748.3	38059.9
P61604	High	10 kDa heat shock protein, mitochondrial [OS=Homo sapiens]	5	HSPE1	7.45929e+06	8.76005e+06	8.10871e+06	3.18357e+06	6.74742e+06	2.64814e+06
P61626	High	lysozyme c [OS=Homo sapiens]	5	LYZ	6.79887e+06	2.19955e+06	4.25187e+06	2.90171e+06	1.69421e+06	1.38857e+06
P61764	High	Syntaxin-binding protein 1 [OS=Homo sapiens]	6	STXBP1	54021	444262	260041	23055.8	342193	84924.1
P61981	High	14-3-3 protein gamma [OS=Homo sapiens]	4	YWHAG	354758	382054	937179	151408	294277	306064
P62070	High	Ras-related protein R-Ras2 [OS=Homo sapiens]	3	RRAS2	232536	466986	471659	99244.8	359696	154034
P62079	High	Tetraspanin-5 [OS=Homo sapiens]	2	TSPAN5	202549	130791	321734	86446.3	100741	105072
P62081	High	40S ribosomal protein S7 [OS=Homo sapiens]	1	RPS7	115552	77333.9	129132	49316.9	59566.4	42171.8
P62136-1	High	serine/threonine-protein phosphatase PP1-alpha catalytic subunit [OS=Homo sapiens]	1	PPP1CA	586276	409567	865153	250218	315469	282541
P62140	High	Serine/threonine-protein phosphatase PP1-beta catalytic subunit [OS=Homo sapiens]	2	PPP1CB	175223	59823.1	245724	74783.9	46078.7	80248.4
P62241	High	40S ribosomal protein S8 [OS=Homo sapiens]	2	RPS8	179158	58037.9	57315.1	76463.5	44703.7	18717.9
P62258-1	High	14-3-3 protein epsilon [OS=Homo sapiens]	14	YWHAE	1.22763e+07	4.71795e+06	2.18909e+07	5.23944e+06	3.634e+06	7.14912e+06
P62269	High	40S ribosomal protein S18 [OS=Homo sapiens]	5	RPS18	1.43873e+06	633637	1.9005e+06	614039	488058	620665
P62277	High	40S ribosomal protein S13 [OS=Homo sapiens]	2	RPS13	321754	143538	527223	137322	110560	172180
P62304	High	small nuclear ribonucleoprotein E [OS=Homo sapiens]	2	SNRPE	152335	495289	242909	65015.3	381496	79329.3
P62306	High	Small nuclear ribonucleoprotein F [OS=Homo sapiens]	2	SNRPF	40371.9	92833	68891.6	17230.4	71504.6	22498.6
P62314	High	Small nuclear ribonucleoprotein Sm D1 [OS=Homo sapiens]	1	SNRPD1	93438.9	220134	151847	39879	169558	49590.1
P62316	High	Small nuclear ribonucleoprotein Sm D2 [OS=Homo sapiens]	3	SNRPD2	90528.2	405434	93616	38636.8	312285	30573.1
P62318	High	small nuclear ribonucleoprotein sm d3 [OS=Homo sapiens]	2	SNRPD3	135672	610378	271475	57903.9	470144	88658.2
P62330	High	ADP-ribosylation factor 6 [OS=Homo sapiens]	5	ARF6	504601	482228	725788	215360	371436	237027
P62736	High	Actin, aortic smooth muscle [OS=Homo sapiens]	11	ACTA2	5.3036e+07	1.07885e+08	8.00277e+07	2.26354e+07	8.30986e+07	2.61354e+07
P62745	High	Rho-related GTP-binding protein RhoB [OS=Homo sapiens]	2	RHOB	241209	205931	431064	102946	158618	140777
P62753	High	40S RIBOSOMAL PROTEIN S6 [OS=Homo sapiens]	2	RPS6	174848	90092	-	74623.9	69393.3	-
P62805	High	histone H4 [OS=Homo sapiens]	8	HIST1H4A; HIST1H4F; HIST1H4D; HIST1H4J; HIST2H4A; HIST2H4B; HIST1H4H; HIST1H4C; HIST4H4; HIST1H4E; HIST1H4I; HIST1H4B; HIST1H4K; HIST1H4L	1.05287e+08	1.35735e+07	4.26728e+07	4.49358e+07	1.0455e+07	1.39361e+07
P62820	High	Ras-related protein Rab-1A [OS=Homo sapiens]	3	RAB1A	409493	3.3248e+06	999359	174769	2.56093e+06	326370
P62834	High	ras-related protein Rap-1A [OS=Homo sapiens]	4	RAP1A	807402	1.33499e+06	757229	344593	1.02828e+06	247296
P62851	High	40S ribosomal protein S25 [OS=Homo sapiens]	1	RPS25	353755	88152	199011	150980	67899	64992.8
P62879	High	Guanine nucleotide-binding protein G(I)/G(S)/G(T) subunit beta-2 [OS=Homo sapiens]	8	GNB2	2.23834e+07	2.91079e+07	2.84868e+07	9.55306e+06	2.24204e+07	9.30322e+06
P62906	High	60S ribosomal protein L10A [OS=Homo sapiens]	4	RPL10A	652825	326842	695866	278621	251750	227256
P62913	High	60S ribosomal protein L11 [OS=Homo sapiens]	2	RPL11	559404	369313	625216	238749	284463	204183
P62937	High	peptidyl-prolyl cis-trans isomerase A [OS=Homo sapiens]	10	PPIA	1.42954e+07	7.12446e+06	2.22555e+07	6.10117e+06	5.48761e+06	7.26821e+06
P62942	High	Peptidyl-prolyl cis-trans isomerase FKBP1A [OS=Homo sapiens]	2	FKBP1A	180073	48506.1	346693	76853.8	37361.8	113223
P63000-1	High	Ras-related C3 botulinum toxin substrate 1 [OS=Homo sapiens]	3	RAC1	3.57074e+06	3.19464e+06	3.66998e+06	1.52397e+06	2.46067e+06	1.19854e+06
P63092-3	High	Isoform 3 of Guanine nucleotide-binding protein G(s) subunit alpha isoforms short [OS=Homo sapiens]	1	GNAS	-	55889.1	55343.5	-	43048.6	18074.1
P63096-1	High	Guanine nucleotide-binding protein G(i) subunit alpha-1 [OS=Homo sapiens]	7	GNAI1	1.71584e+06	1.86465e+06	1.99131e+06	732309	1.43625e+06	650320
P63104-1	High	14-3-3 protein zeta/delta [OS=Homo sapiens]	9	YWHAZ	3.95437e+06	1.73163e+06	6.56284e+06	1.68769e+06	1.33378e+06	2.14329e+06
P63167	High	Dynein light chain 1, cytoplasmic [OS=Homo sapiens]	1	DYNLL1	68052	244741	169264	29044.1	188512	55278.1
P63218	Medium	Guanine nucleotide-binding protein G(I)/G(S)/G(O) subunit gamma-5 OS=Homo sapiens GN=GNG5 PE=1 SV=3	1	GNG5	379077	388070	451389	161787	298910	147414
P67775	High	Serine/threonine-protein phosphatase 2A catalytic subunit alpha isoform [OS=Homo sapiens]	11	PPP2CA	1.09757e+06	636379	1.61337e+06	468435	490171	526895
P67870	High	Casein kinase II subunit beta [OS=Homo sapiens]	1	CSNK2B	35739.1	36828.3	69837.7	15253.2	28367	22807.6
P67936	High	Tropomyosin alpha-4 chain [OS=Homo sapiens]	6	TPM4	1.45629e+06	2.00851e+06	2.9803e+06	621533	1.54706e+06	973306
P68036	High	Ubiquitin-conjugating enzyme E2 L3 [OS=Homo sapiens]	2	UBE2L3	131056	66130.1	156832	55933.5	50936.7	51218.1
P68366	High	Tubulin alpha-4A chain [OS=Homo sapiens]	5	TUBA4A	1.66345e+06	3.43114e+06	2.327e+06	709950	2.64283e+06	759952
P68402-1	High	platelet-activating factor acetylhydrolase IB subunit beta [OS=Homo sapiens]	1	PAFAH1B2	75716.1	35940.4	118430	32315.1	27683	38676.9
P68871	High	Hemoglobin subunit beta [OS=Homo sapiens]	1	HBB	5.88542e+06	7.32209e+07	3.44219e+06	2.51185e+06	5.63984e+07	1.12415e+06
P78310-1	High	Coxsackievirus and adenovirus receptor [OS=Homo sapiens]	4	CXADR	526442	462287	112017	224682	356077	36582.4
P78369-1	High	Claudin-10 [OS=Homo sapiens]	2	CLDN10	55589.2	84185.1	34267.4	23725.1	64843.5	11191
P78371-1	High	T-complex protein 1 subunit beta [OS=Homo sapiens]	15	CCT2	2.73694e+06	1.37746e+06	3.84364e+06	1.16811e+06	1.06099e+06	1.25526e+06
P78386	High	Keratin, type II cuticular Hb5 [OS=Homo sapiens]	4	KRT85	-	47102.2	253498	-	36280.5	82787.3
P78410-1	High	Butyrophilin subfamily 3 member A2 [OS=Homo sapiens]	2	BTN3A2	53487	84424	180546	22827.9	65027.5	58962.8
P78417	High	Glutathione S-transferase omega-1 [OS=Homo sapiens]	3	GSTO1	588986	284413	1.2123e+06	251375	219069	395912
P78527	High	DNA-dependent protein kinase catalytic subunit [OS=Homo sapiens]	50	PRKDC	3.9041e+06	3.27401e+06	5.10869e+06	1.66624e+06	2.5218e+06	1.6684e+06
P78536-1	High	Disintegrin and metalloproteinase domain-containing protein 17 [OS=Homo sapiens]	2	ADAM17	108614	146439	118679	46355.6	112795	38758.1
P78537	High	Biogenesis of lysosome-related organelles complex 1 subunit 1 [OS=Homo sapiens]	1	BLOC1S1	22887.1	56179.6	43398.9	9768.06	43272.3	14173.2
P78540	High	arginase-2, mitochondrial [OS=Homo sapiens]	3	ARG2	53674.8	59039.1	41891.3	22908	45474.8	13680.8
P79483	High	HLA class II histocompatibility antigen, DR beta 3 chain [OS=Homo sapiens]	3	HLA-DRB3	2.16432e+06	76332	-	923714	58794.7	-
P80188	High	Neutrophil gelatinase-associated lipocalin [OS=Homo sapiens]	5	LCN2	52453.4	108468	131523	22386.7	83547.1	42952.6
P80303	High	Nucleobindin-2 [OS=Homo sapiens]	2	NUCB2	134606	200823	337256	57448.6	154684	110141
P80365	High	corticosteroid 11-beta-dehydrogenase isozyme 2 [OS=Homo sapiens]	20	HSD11B2	3.12401e+07	2.36277e+07	1.50136e+07	1.33331e+07	1.81992e+07	4.90314e+06
P80404	High	4-aminobutyrate aminotransferase, mitochondrial [OS=Homo sapiens]	25	ABAT	7.54645e+06	9.17395e+06	1.14791e+07	3.22077e+06	7.06623e+06	3.74883e+06
P80723	Medium	Brain acid soluble protein 1 [OS=Homo sapiens]	1	BASP1	-	20327.7	16064.6	-	15657.4	5246.39
P81605	High	Dermcidin [OS=Homo sapiens]	3	DCD	3.32456e+06	2.67023e+06	3.67232e+06	1.4189e+06	2.05674e+06	1.1993e+06
P82650	High	28S ribosomal protein S22, mitochondrial [OS=Homo sapiens]	5	MRPS22	370278	250453	157495	158032	192911	51434.8
P82663	High	28S ribosomal protein S25, mitochondrial [OS=Homo sapiens]	2	MRPS25	153879	52894.5	59074.4	65674.2	40742	19292.5
P82673-1	High	28S ribosomal protein S35, mitochondrial [OS=Homo sapiens]	2	MRPS35	169572	81777.7	41764.3	72372	62989.2	13639.4
P82909	High	28S ribosomal protein S36, mitochondrial [OS=Homo sapiens]	4	MRPS36	107968	431112	32656.6	46079.8	332064	10665
P82921	High	28S ribosomal protein S21, mitochondrial [OS=Homo sapiens]	1	MRPS21	37487.2	20898.7	-	15999.2	16097.2	-
P82933	High	28S ribosomal protein S9, mitochondrial [OS=Homo sapiens]	3	MRPS9	216725	64742	262486	92496.5	49867.5	85722.7
P82980	High	Retinol-binding protein 5 [OS=Homo sapiens]	1	RBP5	1.13768e+06	501769	1.18978e+06	485553	386487	388558
P83111-1	High	Serine beta-lactamase-like protein LACTB, mitochondrial [OS=Homo sapiens]	9	LACTB	975539	646727	434144	416353	498141	141783
P83731	High	60S ribosomal protein L24 [OS=Homo sapiens]	2	RPL24	232267	99581.9	28314.1	99129.7	76702.9	9246.83
P84090	High	Enhancer of rudimentary homolog [OS=Homo sapiens]	2	ERH	37788.1	105401	46989.6	16127.7	81185.1	15345.9
P84095	High	Rho-related GTP-binding protein RhoG [OS=Homo sapiens]	4	RHOG	183446	225676	105795	78293.3	173827	34550.5
P84157-2	High	Isoform 2 of Matrix-remodeling-associated protein 7 [OS=Homo sapiens]	2	MXRA7	-	35170.3	42990.6	-	27089.9	14039.9
P84243	High	histone H3.3 [OS=Homo sapiens]	3	H3F3A; H3F3AP4; H3F3B	1.79579e+07	1.93808e+06	6.71243e+06	7.66431e+06	1.49281e+06	2.19214e+06
P98082	High	Disabled homolog 2 [OS=Homo sapiens]	7	DAB2	1.48171e+06	1.41476e+06	2.50437e+06	632384	1.08971e+06	817877
P98164	High	Low-density lipoprotein receptor-related protein 2 [OS=Homo sapiens]	119	LRP2	4.81184e+07	3.31176e+07	1.94787e+07	2.05366e+07	2.55088e+07	6.36134e+06
P98172	High	ephrin-B1 [OS=Homo sapiens]	6	EFNB1	624806	1.42279e+06	1.08655e+06	266662	1.0959e+06	354846
P98173-1	High	Protein FAM3A [OS=Homo sapiens]	1	FAM3A	57063.6	27719.1	59716	24354.3	21350.6	19502
P98194-1	High	Calcium-transporting ATPase type 2C member 1 [OS=Homo sapiens]	6	ATP2C1	338872	406295	257234	144628	312948	84007.5
P98196	High	Probable phospholipid-transporting ATPase IH [OS=Homo sapiens]	7	ATP11A	414297	474051	364963	176819	365138	119189
Q00577	High	Transcriptional activator protein Pur-alpha [OS=Homo sapiens]	4	PURA	169265	290091	245476	72241.2	223443	80167.5
Q01082-1	High	Spectrin beta chain, non-erythrocytic 1 [OS=Homo sapiens]	10	SPTBN1	3.55332e+07	1.02627e+08	5.46011e+07	1.51653e+07	7.90481e+07	1.78316e+07
Q01105	High	Protein SET [OS=Homo sapiens]	2	SET	112658	15213.3	309413	48081.4	11718	101048
Q01955-1	High	collagen alpha-3(IV) chain [OS=Homo sapiens]	7	COL4A3	387016	199865	655868	165176	153946	214193
Q01995	High	transgelin [OS=Homo sapiens]	8	TAGLN	3.20654e+06	1.39786e+06	2.71663e+06	1.36853e+06	1.0767e+06	887195
Q02127	High	Dihydroorotate dehydrogenase (Quinone), mitochondrial [OS=Homo sapiens]	9	DHODH	1.34923e+06	986661	676557	575840	759975	220950
Q02218	High	2-oxoglutarate dehydrogenase, mitochondrial [OS=Homo sapiens]	6	OGDH	2.22222e+07	1.66161e+07	1.31897e+07	9.48426e+06	1.27986e+07	4.3075e+06
Q02252	High	Methylmalonate-semialdehyde dehydrogenase [acylating], mitochondrial [OS=Homo sapiens]	30	ALDH6A1	4.30427e+07	2.65714e+07	4.73421e+07	1.83703e+07	2.04666e+07	1.5461e+07
Q02318	High	Sterol 26-hydroxylase, mitochondrial [OS=Homo sapiens]	8	CYP27A1	1.08568e+06	268659	572183	463362	206934	186863
Q02338	High	D-beta-hydroxybutyrate dehydrogenase, mitochondrial [OS=Homo sapiens]	15	BDH1	1.27593e+07	6.20063e+06	3.39194e+06	5.44558e+06	4.77603e+06	1.10774e+06
Q02413	High	Desmoglein-1 [OS=Homo sapiens]	22	DSG1	3.88816e+06	2.71329e+06	5.60659e+06	1.65944e+06	2.08991e+06	1.831e+06
Q02763	High	Angiopoietin-1 receptor [OS=Homo sapiens]	5	TEK	100619	528089	135632	42943.2	406761	44294.6
Q02790	High	Peptidyl-prolyl cis-trans isomerase FKBP4 [OS=Homo sapiens]	4	FKBP4	242759	167738	477461	103608	129200	155929
Q02878	High	60S ribosomal protein L6 [OS=Homo sapiens]	1	RPL6	19093.5	12796.6	24172.9	8148.97	9856.59	7894.37
Q02880	High	DNA topoisomerase 2-beta [OS=Homo sapiens]	2	TOP2B	26413.6	56436.6	29205.6	11273.1	43470.3	9537.95
Q02928	High	Cytochrome P450 4A11 [OS=Homo sapiens]	17	CYP4A11	4.82137e+06	4.33949e+06	1.18919e+06	2.05773e+06	3.34249e+06	388366
Q02952-1	High	A-kinase anchor protein 12 [OS=Homo sapiens]	5	AKAP12	13823.6	67274.6	192721	5899.82	51818.3	62938.6
Q02978	High	Mitochondrial 2-oxoglutarate/malate carrier protein [OS=Homo sapiens]	13	SLC25A11	2.07127e+07	1.9363e+07	1.2396e+07	8.84001e+06	1.49144e+07	4.04827e+06
Q03135	High	Caveolin-1 [OS=Homo sapiens]	6	CAV1	4.35554e+06	3.18872e+06	2.53209e+06	1.85891e+06	2.45611e+06	826930
Q03154-1	High	Aminoacylase-1 [OS=Homo sapiens]	19	ACY1	2.23697e+07	1.0053e+07	2.792e+07	9.54721e+06	7.74333e+06	9.11812e+06
Q03252	High	Lamin-B2 [OS=Homo sapiens]	25	LMNB2	5.62673e+06	1.16801e+07	9.39989e+06	2.40145e+06	8.99663e+06	3.06981e+06
Q03431	High	Parathyroid hormone/parathyroid hormone-related peptide receptor [OS=Homo sapiens]	1	PTH1R	34215.6	54914.9	18418.2	14603	42298.2	6015.02
Q03591	High	Complement factor H-related protein 1 [OS=Homo sapiens]	3	CFHR1	745090	238218	111636	317999	183488	36458.2
Q04609	High	glutamate carboxypeptidase 2 [OS=Homo sapiens]	3	FOLH1	186865	154306	34406.7	79752.6	118854	11236.5
Q04695	High	Keratin, type I cytoskeletal 17 [OS=Homo sapiens]	12	KRT17	3.24823e+06	2.94248e+06	5.10934e+06	1.38632e+06	2.26644e+06	1.66861e+06
Q04760-1	High	lactoylglutathione lyase [OS=Homo sapiens]	3	GLO1	594466	205158	842566	253714	158023	275165
Q04837	High	Single-stranded DNA-binding protein, mitochondrial [OS=Homo sapiens]	6	SSBP1	1.35993e+06	1.18771e+06	1.4126e+06	580410	914831	461325
Q04917	High	14-3-3 protein eta [OS=Homo sapiens]	6	YWHAH	559209	313973	1.12963e+06	238666	241837	368916
Q04941-1	High	proteolipid protein 2 [OS=Homo sapiens]	2	PLP2	2.26537e+06	2.41493e+06	2.08346e+06	966841	1.8601e+06	680415
Q05707-1	High	Collagen alpha-1(XIV) chain [OS=Homo sapiens]	29	COL14A1	506038	232407	236081	215973	179011	77099.3
Q05CF5	High	CFHR5 protein [OS=Homo sapiens]	2	CFHR5	-	88077.7	66897.7	-	67841.8	21847.4
Q05CP7	High	Fabp1 protein [OS=Homo sapiens]	7	FABP1	5.55972e+06	2.422e+06	6.99741e+06	2.37285e+06	1.86554e+06	2.28521e+06
Q05DH1	High	Proteasome subunit alpha type [OS=Homo sapiens]	7	PSMA7	1.78688e+06	637089	2.3906e+06	762629	490717	780722
Q06136	High	3-ketodihydrosphingosine reductase [OS=Homo sapiens]	6	KDSR	669273	938133	588677	285641	722596	192250
Q06278	High	aldehyde oxidase [OS=Homo sapiens]	5	AOX1	731721	372732	376901	312293	287097	123088
Q06323-1	High	Proteasome activator complex subunit 1 [OS=Homo sapiens]	10	PSME1	2.04324e+06	1.0197e+06	3.39014e+06	872040	785424	1.10715e+06
Q06481	High	Amyloid-like protein 2 [OS=Homo sapiens]	2	APLP2	17838.9	82939.5	-	7613.51	63884.1	-
Q06830	High	peroxiredoxin-1 [OS=Homo sapiens]	9	PRDX1	3.1109e+07	9.65768e+06	3.29569e+07	1.32771e+07	7.43882e+06	1.0763e+07
Q07065	High	Cytoskeleton-associated protein 4 [OS=Homo sapiens]	27	CKAP4	7.76485e+06	1.69673e+07	1.15412e+07	3.31398e+06	1.30691e+07	3.76911e+06
Q07812	High	Apoptosis regulator BAX [OS=Homo sapiens]	6	BAX	1.31329e+06	611675	741588	560502	471143	242188
Q07837	High	neutral and basic amino acid transport protein rBAT [OS=Homo sapiens]	11	SLC3A1	1.69754e+06	1.63024e+06	742697	724497	1.25569e+06	242550
Q07954	High	prolow-density lipoprotein receptor-related protein 1 [OS=Homo sapiens]	43	LRP1	2.37214e+06	4.4854e+06	3.71396e+06	1.01241e+06	3.45487e+06	1.2129e+06
Q07960	High	rho GTPase-activating protein 1 [OS=Homo sapiens]	7	ARHGAP1	1.57027e+06	640201	1.78158e+06	670179	493115	581826
Q08188	High	Protein-glutamine gamma-glutamyltransferase E [OS=Homo sapiens]	15	TGM3	1.3146e+06	1.07084e+06	1.81646e+06	561062	824816	593220
Q08211	High	Atp-dependent rna helicase a [OS=Homo sapiens]	27	DHX9	1.06235e+06	6.25608e+06	1.48095e+06	453403	4.81874e+06	483649
Q08257	High	Quinone oxidoreductase [OS=Homo sapiens]	18	CRYZ	2.45006e+07	1.44048e+07	1.66262e+07	1.04567e+07	1.10953e+07	5.42978e+06
Q08380	High	Galectin-3-binding protein [OS=Homo sapiens]	12	LGALS3BP	3.03708e+06	2.54244e+06	2.85034e+06	1.2962e+06	1.95831e+06	930863
Q08426	High	Peroxisomal bifunctional enzyme [OS=Homo sapiens]	35	EHHADH	1.68419e+07	1.66412e+07	1.2692e+07	7.18799e+06	1.28179e+07	4.14494e+06
Q08431	High	Lactadherin [OS=Homo sapiens]	2	MFGE8	3.3192e+06	3.18008e+06	4.76304e+06	1.41661e+06	2.44946e+06	1.55551e+06
Q08477-2	High	Isoform CYP4F3B of Docosahexaenoic acid omega-hydroxylase CYP4F3 [OS=Homo sapiens]	3	CYP4F3	663793	996270	143590	283302	767377	46893.4
Q08554-1	High	Desmocollin-1 [OS=Homo sapiens]	5	DSC1	991429	834312	1.56267e+06	423134	642629	510336
Q08623	High	Pseudouridine-5'-phosphatase [OS=Homo sapiens]	1	HDHD1; PUDP	21432.1	21187	38371.6	9147.08	16319.3	12531.4
Q08722	High	Leukocyte surface antigen CD47 [OS=Homo sapiens]	2	CD47	6.11321e+06	5.85236e+06	4.79177e+06	2.60907e+06	4507774	1.56489e+06
Q08AM6	High	Protein VAC14 homolog [OS=Homo sapiens]	3	VAC14	115911	92289	156491	49470.1	71085.6	51106.9
Q08AS3	High	HLA class II histocompatibility antigen, DQ alpha 1 chain [OS=Homo sapiens]	1	HLA-DQA1; LOC100509457	180744	426475	1.06978e+06	77140	328492	349369
Q09666-1	High	Neuroblast differentiation-associated protein AHNAK [OS=Homo sapiens]	46	AHNAK	788215	5.62193e+06	1.82834e+06	336404	4.33029e+06	597100
Q0VG54	High	TNS1 protein [OS=Homo sapiens]	4	TNS1	33782	74326.9	61720.5	14417.9	57250.3	20156.7
Q0Z7D8	High	Cytochrome c oxidase subunit 2 [OS=Homo sapiens]	1	COX2	53639.5	61143.8	-	22892.9	47096	-
Q0Z8D6	High	Mannose receptor [OS=Homo sapiens]	19	MRC1	1.0819e+06	1.3e+06	216699	461746	1.00132e+06	70769.4
Q10471	High	Polypeptide N-acetylgalactosaminyltransferase 2 [OS=Homo sapiens]	9	GALNT2	716161	1.0396e+06	1.22559e+06	305652	800747	400254
Q10472	High	Polypeptide N-acetylgalactosaminyltransferase 1 [OS=Homo sapiens]	1	GALNT1	14575.3	-	28705.3	6220.62	-	9374.55
Q10588	High	ADP-ribosyl cyclase/cyclic ADP-ribose hydrolase 2 [OS=Homo sapiens]	5	BST1	600974	1.1153e+06	315909	256491	859059	103169
Q10589	High	bone marrow stromal antigen 2 [OS=Homo sapiens]	3	BST2	941549	1.39548e+06	1.11093e+06	401846	1.07487e+06	362807
Q10713	High	Mitochondrial-processing peptidase subunit alpha [OS=Homo sapiens]	7	PMPCA	446838	462909	405837	190707	356555	132538
Q11201	High	CMP-N-acetylneuraminate-beta-galactosamide-alpha-2,3-sialyltransferase 1 [OS=Homo sapiens]	2	ST3GAL1	83674.2	159128	141037	35711.5	122569	46059.9
Q12768	High	WASH complex subunit 5 [OS=Homo sapiens]	12	KIAA0196; WASHC5	928254	286673	662493	396172	220810	216357
Q12769	High	nuclear pore complex protein Nup160 [OS=Homo sapiens]	3	NUP160	84353	156459	37837.4	36001.3	120512	12356.9
Q12797	High	Aspartyl/Asparaginyl beta-hydroxylase [OS=Homo sapiens]	14	ASPH	1.5076e+06	2.21804e+06	1.12436e+06	643431	1.70844e+06	367193
Q12846	High	Syntaxin-4 [OS=Homo sapiens]	6	STX4	426637	1.54877e+06	543806	182085	1.19294e+06	177596
Q12860	High	Contactin-1 [OS=Homo sapiens]	1	CNTN1	34352.1	23645.4	67891.7	14661.2	18212.9	22172.1
Q12904-1	High	aminoacyl tRNA synthase complex-interacting multifunctional protein 1 [OS=Homo sapiens]	4	AIMP1	29021.6	15767.3	40474.7	12386.2	12144.8	13218.2
Q12906-1	High	Interleukin enhancer-binding factor 3 [OS=Homo sapiens]	3	ILF3	70796.5	92013.6	112707	30215.4	70873.4	36808
Q12955	High	Ankyrin-3 [OS=Homo sapiens]	8	ANK3	305829	429681	451102	130525	330962	147321
Q12959	High	Disks large homolog 1 [OS=Homo sapiens]	8	DLG1	130751	397938	336993	55803.6	306511	110055
Q12965	High	unconventional myosin-Ie [OS=Homo sapiens]	10	MYO1E	928903	488119	1.05658e+06	396449	375973	345057
Q13011	High	Delta(3,5)-Delta(2,4)-dienoyl-CoA isomerase, mitochondrial [OS=Homo sapiens]	11	ECH1	1.82803e+07	1.86697e+07	4.43617e+06	7.80189e+06	1.43803e+07	1.44876e+06
Q13018-1	High	Secretory phospholipase A2 receptor [OS=Homo sapiens]	9	PLA2R1	605331	663481	410925	258351	511046	134200
Q13057	High	Bifunctional coenzyme A synthase [OS=Homo sapiens]	4	COASY	253126	110234	196870	108032	84907.8	64293.7
Q13098	High	COP9 signalosome complex subunit 1 [OS=Homo sapiens]	1	GPS1	72686.2	37643.5	135982	31021.9	28994.9	44408.9
Q13113	High	PDZK1-interacting protein 1 [OS=Homo sapiens]	4	PDZK1IP1	30926.6	659468	106222	13199.2	507955	34690
Q13126-1	High	S-methyl-5'-thioadenosine phosphorylase [OS=Homo sapiens]	1	MTAP	61295.3	19765	66423	26160.4	15224	21692.4
Q13131	High	5'-AMP-activated protein kinase catalytic subunit alpha-1 [OS=Homo sapiens]	1	PRKAA1	59669.6	-	93250.8	25466.5	-	30453.8
Q13144	Medium	Translation initiation factor eIF-2B subunit epsilon [OS=Homo sapiens]	1	EIF2B5	263390	174074	202103	112413	134080	66002.6
Q13155	High	aminoacyl tRNA synthase complex-interacting multifunctional protein 2 [OS=Homo sapiens]	3	AIMP2	163663	100429	158810	69850.2	77355.7	51864.2
Q13162	High	Peroxiredoxin-4 [OS=Homo sapiens]	8	PRDX4	2.27873e+06	2.08773e+06	1.93444e+06	972546	1.60808e+06	631748
Q13185	High	chromobox protein homolog 3 [OS=Homo sapiens]	2	CBX3; C15orf57; CCDC32	49326.8	68679.1	69363.8	21052.3	52900.1	22652.8
Q13200	High	26S proteasome non-ATPase regulatory subunit 2 [OS=Homo sapiens]	2	PSMD2	148764	79591.5	202268	63491.2	61305.3	66056.6
Q13217	High	DnaJ homolog subfamily C member 3 [OS=Homo sapiens]	8	DNAJC3	338975	986599	599730	144672	759928	195860
Q13228	High	Selenium-binding protein 1 [OS=Homo sapiens]	14	SELENBP1	3.36419e+06	1.77385e+06	6.49379e+06	1.43581e+06	1.3663e+06	2.12074e+06
Q13232	High	Nucleoside diphosphate kinase 3 [OS=Homo sapiens]	7	NME3	476925	536597	582325	203548	413314	190175
Q13308-1	High	Inactive tyrosine-protein kinase 7 [OS=Homo sapiens]	1	PTK7	20593.4	36752.4	44735.8	8789.09	28308.5	14609.8
Q13380	Medium	RNA binding motif (Fragment) OS=Homo sapiens GN=RBM PE=4 SV=1	1	RBM	116792	50280	86576.8	49846	38728.1	28274.2
Q13423	High	NAD(P) transhydrogenase, mitochondrial [OS=Homo sapiens]	39	NNT	8.7437e+07	4.41854e+07	2.96709e+07	3.73175e+07	3.40338e+07	9.68991e+06
Q13424	High	Alpha-1-syntrophin [OS=Homo sapiens]	2	SNTA1	-	110430	25014.1	-	85058.6	8169.08
Q13425-1	High	Beta-2-syntrophin [OS=Homo sapiens]	10	SNTB2	254907	1.97801e+06	570968	108792	1.52356e+06	186466
Q13443	High	disintegrin and metalloproteinase domain-containing protein 9 [OS=Homo sapiens]	6	ADAM9	362352	318963	219477	154649	245681	71676.8
Q13445	High	Transmembrane emp24 domain-containing protein 1 [OS=Homo sapiens]	4	TMED1	852357	880911	680124	363780	678521	222115
Q13451-1	High	Peptidyl-prolyl cis-trans isomerase FKBP5 [OS=Homo sapiens]	1	FKBP5	97042.1	39993.2	126898	41416.8	30804.8	41442.3
Q13557	High	Calcium/calmodulin-dependent protein kinase type II subunit delta [OS=Homo sapiens]	5	CAMK2D	76074	239956	237859	32467.8	184826	77679.8
Q13561-1	High	dynactin subunit 2 [OS=Homo sapiens]	6	DCTN2	44220.6	357254	330312	18873	275175	107873
[truncated: 1,188 more rows]

## Sheet: Glom ECM fraction (all)
Accession	Protein FDR Confidence: Combined	Description	# Unique Peptides	Gene	Abundances (Normalized): F2: Sample, G_37, Young	Abundances (Normalized): F3: Sample, G_29, Young	Abundances (Normalized): F6: Sample, G_15, Young	Abundance: F2: Sample, G_37, Young	Abundance: F3: Sample, G_29, Young	Abundance: F6: Sample, G_15, Young	Modifications
A0A024QZ42	High	HCG1985580, isoform CRA_c [OS=Homo sapiens]	2	PDCD6	45831.5	48855.8	63894.9	33274.5	27636.7	28471.6	-
A0A024R035	High	Complement component 9, isoform CRA_a [OS=Homo sapiens]	16	C9	6.22566e+06	3.33182e+06	3.77847e+06	4.51994e+06	1.88474e+06	1.68368e+06	-
A0A024R1M8	High	Apolipoprotein L, 2, isoform CRA_a [OS=Homo sapiens]	1	APOL2	64670.9	28252	77075.8	46952.2	15981.5	34345	-
A0A024R321	High	filamin B, beta (actin binding protein 278), isoform CRA_a [OS=Homo sapiens]	16	FLNB	236728	341465	196259	171869	193160	87453.1	-
A0A024R3X7	High	heat shock 10kDa protein 1 (chaperonin 10), isoform CRA_d [OS=Homo sapiens]	3	HSPE1	645299	174563	1.0242e+06	468499	98746.6	456386	-
A0A024R442	High	aspartyl aminopeptidase, isoform CRA_b [OS=Homo sapiens]	5	DNPEP	664078	115308	460223	482132	65227.5	205076	-
A0A024R462	High	fibronectin 1, isoform CRA_n [OS=Homo sapiens]	68	FN1	3.87334e+06	2.74562e+07	4.58275e+06	2.81211e+06	1.55314e+07	2.04207e+06	Oxidation [P462; P1461; P1471; K1544]
A0A024R4E8	High	PDZ domain containing 1, isoform CRA_a [OS=Homo sapiens]	1	PDZK1	63283.1	59071.8	50148.2	45944.6	33415.7	22346.1	-
A0A024R4V7	High	Uncharacterized protein [OS=Homo sapiens]	1	TTC38	10278.1	38020.9	23117.8	7462.05	21507.7	10301.3	-
A0A024R4X1	High	Protein kinase C and casein kinase substrate in neurons 2, isoform CRA_a [OS=Homo sapiens]	2	PACSIN2	83281.7	34979.3	22215	60463.9	19787.1	9899	-
A0A024R5Q4	High	Glycine amidinotransferase (L-arginine:glycine amidinotransferase), isoform CRA_a [OS=Homo sapiens]	13	GATM	2.31085e+06	1.38749e+06	2.53827e+06	1.67772e+06	784873	1.13105e+06	-
A0A024R6I7	High	alpha-1-antitrypsin [OS=Homo sapiens]	1	SERPINA1	1.24887e+07	1.29188e+07	7.31659e+06	9.06701e+06	7.30788e+06	3.26027e+06	Oxidation [K267]
A0A024R7K0	High	Splicing factor, arginine/serine-rich 14, isoform CRA_a [OS=Homo sapiens]	2	SUGP2	6081.21	6902.96	-	4415.06	3904.86	-	-
A0A024R837	High	haloacid dehalogenase-like hydrolase domain containing 3, isoform CRA_a [OS=Homo sapiens]	1	HDHD3	168920	135168	109020	122639	76462	48579.4	-
A0A024R884	High	tenascin C (hexabrachion), isoform CRA_a [OS=Homo sapiens]	28	TNC	52699.8	1.72654e+06	124255	38261	976666	55367.9	-
A0A024R962	High	hCG40889, isoform CRA_b [OS=Homo sapiens]	3	CFH	91494.7	81578.8	80680	66426.8	46147.5	35951	-
A0A024R9H1	High	matrilin 2, isoform CRA_a [OS=Homo sapiens]	14	MATN2	420314	1.07316e+06	669955	305155	607064	298532	-
A0A024RA87	High	septin 7, isoform CRA_a [OS=Homo sapiens]	1	SEPT7	47264.3	14860.2	97653.6	34314.7	8406.11	43514.5	-
A0A024RAB6	High	Heparan sulfate proteoglycan 2 (Perlecan), isoform CRA_b [OS=Homo sapiens]	141	HSPG2	1.85966e+08	2.41905e+08	2.28428e+08	1.35015e+08	1.36841e+08	1.01787e+08	Oxidation [P389; P391; P447; P584; P943; P949; P1659; P1660; K1751; P1770; P1848; P1850; P1858; P3073; P3076; K3080]
A0A024RB27	High	hCG24991, isoform CRA_a [OS=Homo sapiens]	3	hCG_24991	65174.9	101700	53970.2	47318.1	57529.8	24049.1	-
A0A024RBS1	High	GCN1 general control of amino-acid synthesis 1-like 1 (yeast), isoform CRA_b [OS=Homo sapiens]	1	GCN1L1; GCN1	16148.6	19041.9	20010.8	11724.2	10771.6	8916.8	-
A0A059QFD5	High	Cytochrome c oxidase subunit 2 [OS=Homo sapiens]	1	COX2	71470.4	30598.3	19669.8	51888.7	17308.8	8764.85	-
A0A075B7B8	High	immunoglobulin heavy variable 3/OR16-12 (non-functional) [OS=Homo sapiens]	1	IGHV3OR16-12	16658.6	17858.5	-	12094.4	10102.2	-	-
A0A087WTA8	High	Collagen alpha-2(I) chain [OS=Homo sapiens]	50	COL1A2	5.70499e+07	9.92674e+06	2.07662e+07	4.14193e+07	5.61535e+06	9.2534e+06	Oxidation [P99; P100; P106; P108; P114; P118; P121; P126; P190; P193; K196; P199; P202; P208; P226; P253; P256; P259; K262; P273; P286; P294; P295; P298; K307; P313; P319; P322; P324; P328; P346; P348; K352; K358; P361; P366; P369; P370; P372; K378; P390; P391; P393; P394; P417; P418; P432; P439; P442; P447; P451; P454; P465; P469; P475; P477; P480; P487; P493; P495; K496; P520; P522; P531; P532;…
A0A087WU70	High	Carbohydrate sulfotransferase [OS=Homo sapiens]	3	CHST13	91402.2	78708.4	79205.4	66359.6	44523.7	35293.9	-
A0A087WUQ6	High	Glutathione peroxidase [OS=Homo sapiens]	2	GPX1	53140.9	51661.5	73341.2	38581.2	29223.8	32680.8	-
A0A087WV24	High	aromatic-L-amino-acid decarboxylase [OS=Homo sapiens]	8	DDC	982657	299702	402603	713426	169535	179400	-
A0A087WVQ6	High	Clathrin heavy chain [OS=Homo sapiens]	54	CLTC	5.88588e+06	4.23547e+06	1.0736e+07	4.27325e+06	2.39592e+06	4.78397e+06	-
A0A087WVV1	High	proteasome subunit beta type-2 [OS=Homo sapiens]	1	PSMB2	44992.6	26620.3	70505.3	32665.4	15058.5	31417.2	-
A0A087WW88	High	Charged multivesicular body protein 2b [OS=Homo sapiens]	1	CHMP2B	165547	62420.7	76534.5	120190	35310.1	34103.8	-
A0A087WWI4	High	Hypoxia up-regulated protein 1 [OS=Homo sapiens]	1	HYOU1	13014.4	11936.8	11868.2	9448.71	6752.42	5288.47	-
A0A087WX80	High	Laminin subunit alpha-2 [OS=Homo sapiens]	18	LAMA2	149924	497884	574599	108847	281643	256041	-
A0A087WXM8	High	Basal cell adhesion molecule [OS=Homo sapiens]	18	BCAM	9.4356e+06	1.43011e+07	1.54552e+07	6.85041e+06	8.08982e+06	6.88683e+06	-
A0A087WYT3	High	Prostaglandin E synthase 3 [OS=Homo sapiens]	4	PTGES3	105169	992681	102649	76354.5	561539	45740.5	-
A0A087X0K0	High	Collagen alpha-1(XV) chain [OS=Homo sapiens]	10	COL15A1	94019	873423	147719	68259.4	494078	65823.8	Oxidation [P774; P775; P777]
A0A087X0K9	High	Tight junction protein ZO-1 [OS=Homo sapiens]	6	TJP1	18500.5	136028	10943.2	13431.7	76948	4876.28	-
A0A087X0R6	High	Sorting nexin-12 [OS=Homo sapiens]	3	SNX12	129356	172654	58277.3	93914.9	97666.9	25968.4	-
A0A087X0S5	High	Collagen alpha-1(VI) chain [OS=Homo sapiens]	35	COL6A1	4.83408e+07	3.26335e+07	5.25684e+07	3.50962e+07	1.84601e+07	2.34245e+07	Oxidation [K240; P265; P445; P483; P484; P493; P495; P498; P499; P502; P543; K546; P555; P576; P579; P582; P583; P588; P589; P591; K602; P777; P782]
A0A087X1U4	High	Methyl-CpG-binding protein 2 [OS=Homo sapiens]	8	MECP2	615889	2.78712e+06	1.0411e+06	447146	1.57662e+06	463915	Oxidation [P89]
A0A087X260	High	TAR DNA-binding protein 43 [OS=Homo sapiens]	2	TARDBP	51679.6	250089	50071.7	37520.3	141470	22312	-
A0A087X2D0	High	Serine/arginine-rich-splicing factor 3 [OS=Homo sapiens]	3	SRSF3	437432	737897	114631	317583	417413	51079.7	-
A0A087X2I1	High	26S proteasome regulatory subunit 10B [OS=Homo sapiens]	1	PSMC6	35517.1	29145.9	28766.3	25786.1	16487.2	12818.3	-
A0A088QF11	High	choline transporter-like protein 2 isoform 2 [OS=Homo sapiens]	4	SLC44A2	64070.8	58434	150898	46516.5	33054.9	67240.1	-
A0A0A0MQV6	High	fibroblast growth factor [OS=Homo sapiens]	4	FGF2	89124.5	278795	91873.7	64706	157709	40938.9	-
A0A0A0MR02	High	Voltage-dependent anion-selective channel protein 2 [OS=Homo sapiens]	11	VDAC2	2.7369e+06	2.72479e+06	3.35938e+06	1.98704e+06	1.54136e+06	1.49694e+06	-
A0A0A0MRD9	High	Haptoglobin-related protein [OS=Homo sapiens]	3	HPR	24137.8	68673.6	-	17524.5	38847.3	-	-
A0A0A0MSA0	High	Laminin subunit alpha-3 [OS=Homo sapiens]	6	LAMA3	30358.8	100673	76750.4	22041	56948.6	34200	-
A0A0A0MSS8	High	Aldo-keto reductase family 1 member C3 [OS=Homo sapiens]	4	AKR1C3	176006	335980	146700	127784	190057	65369.6	-
A0A0A0MSV6	High	Complement C1q subcomponent subunit B [OS=Homo sapiens]	2	C1QB	20067.5	-	30377.8	14569.4	-	13536.4	-
A0A0A0MTH3	High	Integrin-linked protein kinase [OS=Homo sapiens]	7	ILK	239927	225183	352306	174191	127381	156988	-
A0A0A0U994	High	collagen type IV alpha 5 transcript variant 2 [OS=Homo sapiens]	14	COL4A5	1.05866e+07	1.28108e+07	2.46026e+07	7.68602e+06	7.24679e+06	1.09629e+07	Oxidation [P53; P59; P62; P65; P67; P70; P71; P73; P309; P312; P315; P318; P321; P324; P376; P381; P382; P385; P387; P388; P395; P396; P398; P399; P402; P780; P782; P783; P785; P786; P865; P868; P871; P873; P876; P877; P880; P883; K885; P1411; P1437; P1438; P1440; P1446; P1447; P1449; P1450; P1514; P1541; P1543; P1548; K1550; P1556; K1664]
A0A0B4J2D5	High	Uncharacterized protein [OS=Homo sapiens]	2	C21orf33; LOC102724023	229636	99142.9	138008	166720	56083.1	61496.5	-
A0A0C4DGA2	High	Enoyl-CoA delta isomerase 2, mitochondrial [OS=Homo sapiens]	6	ECI2	396613	352617	450353	287948	199468	200677	-
A0A0C4DGH5	High	cullin-associated nedd8-dissociated protein 1 [OS=Homo sapiens]	2	CAND1	59355.7	23203.9	45523.4	43093.3	13126	20285.2	-
A0A0C4DGN4	High	Zymogen granule protein 16 homolog B [OS=Homo sapiens]	1	ZG16B	8490.2	91340.4	17969	6164.03	51669.4	8007.01	-
A0A0C4DGV8	High	Semaphorin-3B [OS=Homo sapiens]	1	SEMA3B	18250.7	13835.2	17638.3	13250.3	7826.29	7859.62	-
A0A0C4DH22	High	Band 4.1-like protein 1 [OS=Homo sapiens]	4	EPB41L1	133034	30625.8	124148	96585.1	17324.4	55320.4	-
A0A0C4DH25	High	immunoglobulin kappa variable 3D-20 [OS=Homo sapiens]	1	IGKV3D-20	24459.3	22385	20372.7	17757.9	12662.7	9078.09	-
A0A0D9SFB1	High	Dynamin-1 [OS=Homo sapiens]	1	DNM1	31252.9	37504.3	22857.8	22690.2	21215.4	10185.4	-
A0A0D9SGF2	High	Membrane-associated guanylate kinase, WW and PDZ domain-containing protein 2 [OS=Homo sapiens]	1	MAGI2	122814	-	98811.2	89165.2	-	44030.3	-
A0A0G2JHD9	Medium	Collagen alpha-2(XI) chain [OS=Homo sapiens]	1	COL11A2	35334.7	44350.3	17429	25653.6	25088	7766.38	Oxidation [P72]
A0A0G2JIW1	High	Heat shock 70 kDa protein 1B [OS=Homo sapiens]	17	HSPA1B	1.00751e+06	4.11434e+06	1.13134e+06	731467	2.32739e+06	504127	-
A0A0G2JRA8	High	Carcinoembryonic antigen-related cell adhesion molecule 7 (Fragment) OS=Homo sapiens GN=CEACAM7 PE=4 SV=1	1	CEACAM7	80795.9	39212.6	58280.1	58659.2	22181.8	25969.6	Oxidation [P9]
A0A0J9YYH3	High	glucose-6-phosphate isomerase [OS=Homo sapiens]	2	GPI	47949.9	-	58016	34812.4	-	25852	-
A0A0N6YMY6	High	ATP synthase protein 8 OS=Homo sapiens GN=ATP8 PE=3 SV=1	1	ATP8	774757	652163	641189	562487	368915	285714	Oxidation [P36; P37; P39; K40]
A0A0S2Z471	High	Creatine kinase brain isoform 2 [OS=Homo sapiens]	1	CKB	22323.7	26233.2	25070	16207.4	14839.6	11171.2	-
A0A0U1RQK1	High	Uncharacterized protein [OS=Homo sapiens]	1	-	123934	185088	190323	89978	104700	84808	-
A0A0U1RQK4	High	[Protein ADP-ribosylarginine] hydrolase-like protein 1 [OS=Homo sapiens]	1	ADPRHL1	80647.4	72802.6	90964.1	58551.4	41182.9	40533.6	Oxidation [P836; P840; P841]
A0A0U4BW16	High	non-muscle myosin heavy chain 9 [OS=Homo sapiens]	46	MYH9	3.24358e+08	1.32171e+08	2.12063e+08	2.35489e+08	7.47662e+07	9.44951e+07	Oxidation [K29; K228; P594; K885; K943; K1373; K1374; K1516; K1541]
A0A125QYY5	High	GCT-A9 light chain variable region [OS=Homo sapiens]	2	-	32445.5	86856.4	15233.2	23556	49132.9	6787.94	Oxidation [P8]
A0A126LB16	Medium	origin-binding protein [OS=Homo sapiens]	1	U73	74939.2	66704.8	78487.1	54407.2	37733.5	34973.9	-
A0A140TA29	High	Complement C4-B [OS=Homo sapiens]	3	C4B	583291	1.38995e+06	1.37828e+06	423480	786267	614160	-
A0A140TA69	High	keratin, type I cuticular Ha4 [OS=Homo sapiens]	4	KRT34	1.744e+06	320039	210259	1.26618e+06	181039	93691.4	-
A0A140TA84	High	MICOS complex subunit MIC13 [OS=Homo sapiens]	1	C19orf70	26246	19484.9	26275.3	19055.1	11022.2	11708.3	-
A0A140VJI6	High	testicular tissue protein Li 60 [OS=Homo sapiens]	1	DNAH1	30319.8	30113.2	45026.4	22012.7	17034.4	20063.8	-
A0A140VKF9	High	testis tissue sperm-binding protein Li 76m [OS=Homo sapiens]	6	ECHDC3	363594	403764	361668	263975	228401	161159	-
A0A161I202	High	lactoferrin [OS=Homo sapiens]	2	LTF	723434	1.18098e+06	1.04214e+06	525226	668054	464378	-
A0A193CHR0	High	10E8 heavy chain variable region [OS=Homo sapiens]	2	-	42473.1	54435.3	37506.2	30836.2	30792.9	16712.8	-
A0A1B0GTB0	High	Renin receptor [OS=Homo sapiens]	1	ATP6AP2	149862	77530.7	102801	108802	43857.5	45808.2	-
A0A1B0GTG2	High	Alpha-aminoadipic semialdehyde dehydrogenase [OS=Homo sapiens]	5	ALDH7A1	197731	101664	229116	143556	57509.1	102094	-
A0A1B0GTS2	Medium	Obscurin [OS=Homo sapiens]	1	-	73348.2	133743	97385.5	53252.1	75655.5	43395	Oxidation [P1387; P1388; P1391]
A0A1B0GVD5	High	Cathepsin D [OS=Homo sapiens]	4	CTSD	516423	37465.3	42755.4	374932	21193.4	19051.8	-
A0A1B0GW23	High	ABHD14A-ACY1 readthrough [OS=Homo sapiens]	7	ABHD14A-ACY1	326908	2.20949e+06	233302	237341	1.24986e+06	103959	-
A0A1C3PHH2	High	MHC class I antigen [OS=Homo sapiens]	1	HLA-A	275386	322506	270606	199935	182435	120582	-
A0A1C7CYX0	High	Exocyst complex component 3-like protein 2 [OS=Homo sapiens]	2	EXOC3L2	-	47253.9	32258.9	-	26730.5	14374.6	-
A0A1L5LC20	High	MHC class II antigen [OS=Homo sapiens]	2	HLA-DPA1	56831	13394.1	23609.9	41260.3	7576.75	10520.6	-
A0A1U9X8Y4	High	chloride intracellular channel protein [OS=Homo sapiens]	1	CLIC1	26983.4	28552.1	12701.3	19590.4	16151.3	5659.68	-
A0A1U9X9D5	High	VarS [OS=Homo sapiens]	1	VARS	18746.1	-	19773.8	13610	-	8811.19	-
A0A1V0E3V4	High	HLA-DRA [OS=Homo sapiens]	4	HLA-DRA	199107	174052	235211	144555	98457.6	104810	-
A0A1W2PQ51	High	Probable ATP-dependent RNA helicase DDX17 [OS=Homo sapiens]	5	DDX17	223770	182569	108773	162461	103275	48469.5	-
A0A1W6S962	High	GTF2I-BRAF fusion protein [OS=Homo sapiens]	1	GTF2I	19270.3	20195.9	-	13990.6	11424.4	-	-
A0A1Y0BRN0	High	myosin VI transcript variant 008 [OS=Homo sapiens]	28	MYO6	979123	1.06113e+06	919590	710861	600262	409769	-
A0A286YF00	High	Major facilitator superfamily domain-containing protein 8 OS=Homo sapiens GN=MFSD8 PE=1 SV=1	1	MFSD8	103058	147625	78874.7	74821.9	83508.4	35146.6	-
A0A5E4	High	Uncharacterized protein [OS=Homo sapiens]	1	-	13074.9	-	8645.32	9492.6	-	3852.36	Oxidation [P164; K172]
A0N4V7	High	HCG2039797 [OS=Homo sapiens]	1	Tcr-alpha	8.48965e+07	7.90653e+07	5.66612e+07	6.16363e+07	4.47256e+07	2.52483e+07	-
A0N5G5	High	Rheumatoid factor D5 light chain [OS=Homo sapiens]	2	V-kappa-3	89673.2	206199	59323.5	65104.3	116643	26434.6	-
A0PJ50	High	poly [ADP-ribose] polymerase [OS=Homo sapiens]	1	PARP6	-	73790.2	103488	-	41741.6	46114.5	Oxidation [P289; P296; P299]
A1A4E9	High	Keratin 13 [OS=Homo sapiens]	11	KRT13	121371	5.23047e+06	1.83222e+06	88117.8	2.95877e+06	816436	-
A1A4F3	High	O-phosphoseryl-tRNA(Sec) selenium transferase [OS=Homo sapiens]	1	SEPSECS	31388.4	-	14051.2	22788.5	-	6261.22	-
A2A274	High	Aconitate hydratase, mitochondrial [OS=Homo sapiens]	11	ACO2	351899	266201	302611	255485	150584	134843	-
A2J1N0	High	Rheumatoid factor RF-IP14 [OS=Homo sapiens]	1	-	-	13984.8	10642.9	-	7910.93	4742.46	-
A2KBC2	High	Anti-(ED-B) scFV [OS=Homo sapiens]	1	IGKV3-20	121595	296620	151880	88280.4	167792	67677.9	-
A2NB45	High	cold agglutinin FS-1 L-chain [OS=Homo sapiens]	2	-	196048	333932	14738.3	142335	188898	6567.39	-
A2RRE5	High	Grlf1 protein [OS=Homo sapiens]	1	ARHGAP35	58386.9	60429.1	28282.3	42389.9	34183.5	12602.6	Oxidation [P115; K118]
A3KMH1	High	von Willebrand factor A domain-containing protein 8 [OS=Homo sapiens]	18	VWA8	252558	417489	192444	183361	236165	85752.9	-
A3KMH2	High	TNRC18 protein [OS=Homo sapiens]	1	TNRC18	7576.29	306135	10624.2	5500.52	173174	4734.13	Oxidation [K282]
A4FU77	High	SNRNP200 protein [OS=Homo sapiens]	7	SNRNP200	5468.45	91312.5	65365.7	3970.19	51653.6	29127	-
A4FVA6	High	MTCH1 protein [OS=Homo sapiens]	3	MTCH1	79674.6	42067.5	90421.1	57845.2	23796.7	40291.7	-
A4IF54	High	TK2 protein [OS=Homo sapiens]	1	TK2	22354.8	17274.5	22726.9	16230	9771.8	10127.1	-
A4QMU9	High	EPN3 protein [OS=Homo sapiens]	1	EPN3	17556.3	48965.1	44060.6	12746.2	27698.6	19633.4	Oxidation [P14; P28; P29]
A4QPB0	High	IQ motif containing GTPase activating protein 1 [OS=Homo sapiens]	11	IQGAP1	224977	311302	297301	163337	176097	132477	-
A4ZU86	High	truncated nucleolar phosphoprotein B23 [OS=Homo sapiens]	3	NPM1	46024.6	1.08001e+06	23088.8	33414.7	610940	10288.4	-
A5D904	High	Rps9 protein [OS=Homo sapiens]	5	RPS9	457849	426467	573572	332406	241244	255584	-
A5YRV0	High	MUC1 isoform G-LSP [OS=Homo sapiens]	2	MUC1	52643.8	18394.6	-	38220.4	10405.4	-	-
A6H8V1	High	Slit homolog 1 (Drosophila) [OS=Homo sapiens]	1	SLIT1	108845	30100.4	96340.7	79023.4	17027.2	42929.4	Oxidation [K562; K563]
A6ND22	High	28S ribosomal protein S16, mitochondrial [OS=Homo sapiens]	2	MRPS16	68991.3	43046.2	21589.6	50088.9	24350.3	9620.33	-
A6NHL2-1	High	Tubulin alpha chain-like 3 [OS=Homo sapiens]	1	TUBAL3	167580	132963	123792	121666	75214.2	55162	-
A6NLM8	High	translocon-associated protein subunit delta [OS=Homo sapiens]	1	SSR4	24369	17411.2	33848.1	17692.3	9849.16	15082.7	-
A6NLN1	High	polypyrimidine tract binding protein 1, isoform CRA_b [OS=Homo sapiens]	5	PTBP1	173359	286364	168790	125862	161990	75212.9	-
A6XGP7	High	Reticulon [OS=Homo sapiens]	2	RTN4	79193.1	83318.5	100060	57495.6	47131.6	44586.7	-
A7MCZ7	High	UNC84A protein [OS=Homo sapiens]	6	SUN1	32457	277029	17143.5	23564.4	156710	7639.15	-
A7UJ17	High	dnaJ [OS=Homo sapiens]	3	DNAJB6	42124.5	417902	46906.1	30583.1	236398	20901.3	-
A8JLH9	High	ATP synthase subunit A [OS=Homo sapiens]	1	ATP6	121179	63288.2	123944	87977.8	35800.8	55229.4	-
A8K051	High	cDNA FLJ76695, highly similar to Homo sapiens acyl-CoA synthetase medium-chain family member 2 (ACSM2), nuclear gene encoding mitochondrial protein, mRNA [OS=Homo sapiens]	9	ACSM2B	3.02555e+06	6.4966e+06	2.00751e+06	2.1966e+06	3.67499e+06	894546	Oxidation [P380]
A8K0T9	High	cDNA FLJ75422, highly similar to Homo sapiens capping protein (actin filament) muscle Z-line, alpha 1, mRNA [OS=Homo sapiens]	2	CAPZA1	12841.5	45992.6	51526	9323.12	26017.1	22960	-
A8K1Z7	High	cDNA FLJ78578, highly similar to Homo sapiens lipase, hepatic (LIPC), mRNA [OS=Homo sapiens]	1	LIPC	58640.3	37698.9	14075.3	42573.9	21325.5	6271.95	-
A8K3C5	High	cDNA FLJ77715, highly similar to Homo sapiens cisplatin resistance-associated overexpressed protein(LUC7A), mRNA [OS=Homo sapiens]	2	LUC7L3	18685.4	22682.8	-	13565.9	12831.2	-	-
A8K3K1	High	cDNA FLJ78096, highly similar to Homo sapiens actin, alpha, cardiac muscle (ACTC), mRNA [OS=Homo sapiens]	9	ACTC1	2.86633e+07	2.05046e+07	2.37657e+07	2.081e+07	1.1599e+07	1.059e+07	Oxidation [K86; P266; K286; P324; K328; P369]
A8K4G7	High	cDNA FLJ78528, highly similar to Homo sapiens vacuolar protein sorting 4B (yeast) (VPS4B), mRNA [OS=Homo sapiens]	1	VPS4B	-	46673.7	14211.9	-	26402.4	6332.84	-
A8K4Q9	High	cDNA FLJ77931 [OS=Homo sapiens]	9	HKDC1	242192	47168.3	57618.6	175836	26682.1	25674.9	-
A8K4V4	High	cDNA FLJ76392, highly similar to Homo sapiens mitochondrial ribosomal protein L43 (MRPL43), transcript variant 1, mRNA [OS=Homo sapiens]	1	MRPL43	41415.5	17724	16305.1	30068.4	10026.1	7265.55	-
A8K4W0	High	40S ribosomal protein S3a [OS=Homo sapiens]	4	RPS3A	678476	630027	345055	492585	356393	153757	-
A8K525	High	cDNA FLJ76817, highly similar to Homo sapiens non-POU domain containing, octamer-binding (NONO), mRNA [OS=Homo sapiens]	3	NONO	70050	338749	41655.2	50857.5	191624	18561.6	-
A8K586	High	AP-3 complex subunit beta [OS=Homo sapiens]	1	AP3B1	20206.3	17996.3	24297.4	14670.1	10180.1	10826.9	-
A8K5U9	High	cDNA FLJ75056, highly similar to Homo sapiens phosphatidylinositol binding clathrin assembly protein (PICALM), mRNA [OS=Homo sapiens]	2	PICALM	93699.2	43985.6	71337.4	68027.3	24881.8	31788	-
A8K5W7	High	cDNA FLJ75180, highly similar to Homo sapiens mitochondrial isoleucine tRNA synthetase, mRNA [OS=Homo sapiens]	9	IARS2	389940	221352	343651	283103	125214	153131	-
A8K651	High	cDNA FLJ75700, highly similar to Homo sapiens complement component 1, q subcomponent binding protein (C1QBP), nuclear gene encoding mitochondrial protein, mRNA [OS=Homo sapiens]	6	C1QBP	481291	1.02546e+06	338908	349425	580082	151017	-
A8K6X9	High	cDNA FLJ76427, highly similar to Homo sapiens SH2 domain binding protein 1 (tetratricopeptide repeat containing) (SH2BP1), mRNA [OS=Homo sapiens]	1	CTR9	6217.32	-	26603.8	4513.88	-	11854.7	Oxidation [P9]
A8K7F6	High	cDNA FLJ78244, highly similar to Homo sapiens eukaryotic translation initiation factor 4A, isoform 1 (EIF4A1), mRNA [OS=Homo sapiens]	1	EIF4A1	637773	767394	492329	463034	434099	219382	-
A8K7T4	High	cDNA FLJ75774, highly similar to Homo sapiens lectin, mannose-binding 2 (LMAN2), mRNA [OS=Homo sapiens]	1	LMAN2	7992.81	-	16793.4	5802.92	-	7483.14	-
A8K8Z4	High	cDNA FLJ78071, highly similar to Human MHC class III complement component C6 mRNA [OS=Homo sapiens]	1	C6	1.61998e+06	1.26879e+06	724142	1.17613e+06	717731	322678	-
A8K916	High	AP complex subunit beta [OS=Homo sapiens]	3	AP2B1	345312	292737	402676	250703	165595	179432	-
A8K964	High	cDNA FLJ75071, highly similar to Homo sapiens pinin, desmosome associated protein (PNN), mRNA [OS=Homo sapiens]	5	PNN	19616.9	231180	-	14242.2	130774	-	-
A8K9B2	High	cDNA FLJ76725, highly similar to Homo sapiens L-2-hydroxyglutarate dehydrogenase (L2HGDH), mRNA [OS=Homo sapiens]	4	L2HGDH	107332	67298.9	61035.7	77924.6	38069.6	27197.5	-
A8K9K4	High	cDNA FLJ75504, highly similar to Homo sapiens glucosidase I, mRNA [OS=Homo sapiens]	1	MOGS	8966.56	10044.7	16967.3	6509.88	5682.05	7560.63	-
A8K9T3	High	cDNA FLJ76467, highly similar to Homo sapiens acyl-CoA synthetase long-chain family member 1 (ACSL1), mRNA [OS=Homo sapiens]	15	ACSL1	667147	764515	502636	484361	432470	223975	Acetyl [N-Term]
A8KA23	Medium	cDNA FLJ77244, highly similar to Homo sapiens G protein-coupled receptor 157 (GPR157), mRNA [OS=Homo sapiens]	1	GPR157	1.42962e+06	1.60209e+06	1.61367e+06	1.03793e+06	906271	719051	Oxidation [P3; P5; P6; P7; P12]
A8KAJ3	High	cDNA FLJ77823, highly similar to Homo sapiens EGF-containing fibulin-like extracellular matrix protein 1, transcript variant 3, mRNA [OS=Homo sapiens]	6	EFEMP1	-	112826	16760.5	-	63823.5	7468.46	-
A8MUD9	High	60S ribosomal protein L7 [OS=Homo sapiens]	7	RPL7	1.20956e+06	1.20907e+06	2.20923e+06	878165	683946	984435	-
A8MXL6	High	protein SEC13 homolog [OS=Homo sapiens]	2	SEC13	17625.3	51239.7	19926	12796.3	28985.3	8879.04	-
A8MXP9	High	Matrin-3 [OS=Homo sapiens]	10	MATR3	211129	906302	87188.1	153284	512676	38851.1	-
B0AZN7	High	cDNA, FLJ79477, highly similar to Protein-glutamine gamma-glutamyltransferase K [OS=Homo sapiens]	3	TGM1	101342	69690.5	101382	73576	39422.5	45175.8	-
B0BCY8	High	aminopeptidase [OS=Homo sapiens]	4	ENPEP	238351	176967	423578	173047	100107	188746	-
B0QY90	High	eukaryotic translation initiation factor 3 subunit L [OS=Homo sapiens]	1	EIF3L	16622.3	-	26313.6	12068.1	-	11725.3	-
B0QYK0	High	RNA-binding protein EWS [OS=Homo sapiens]	1	EWSR1	13117.6	41258.3	-	9523.6	23339	-	-
B0YJ73	High	Ras suppressor protein 1 variant 5 [OS=Homo sapiens]	1	RSU1	20810.7	25373.3	31591.5	15109	14353.1	14077.2	-
B1AKG0	High	Complement factor H-related protein 1 [OS=Homo sapiens]	1	CFHR1	1.13159e+06	404437	133659	821557	228782	59558.3	-
B1AKN6	High	Nuclear factor 1 [OS=Homo sapiens]	1	NFIA	24404.2	29282.5	39478.5	17717.9	16564.5	17591.6	-
B1ALD9	High	Periostin [OS=Homo sapiens]	2	POSTN	1.18137e+06	3.35027e+06	3.21844e+06	857699	1.89518e+06	1.43414e+06	Oxidation [P81; K475]
B1AP13	High	Complement decay-accelerating factor [OS=Homo sapiens]	1	CD55	95608.8	134302	119759	69413.7	75971.9	53364.4	-
B2MUD5	High	Neutrophil elastase [OS=Homo sapiens]	4	ELANE	411376	437344	384839	298666	247396	171484	-
B2R4A2	High	Cytochrome b-c1 complex subunit 7 [OS=Homo sapiens]	2	UQCRB	79712.4	16602.4	12380.5	57872.6	9391.63	5516.77	-
B2R4P2	High	cDNA, FLJ92164, highly similar to Homo sapiens peroxiredoxin 1 (PRDX1), mRNA [OS=Homo sapiens]	5	PRDX1	1.38862e+06	662134	707171	1.00816e+06	374555	315115	-
B2R659	High	cDNA, FLJ92803, highly similar to Homo sapiens hydroxysteroid (17-beta) dehydrogenase 4 (HSD17B4), mRNA [OS=Homo sapiens]	12	HSD17B4	355327	360584	495682	257973	203975	220876	-
B2R6K1	High	cDNA, FLJ92992, highly similar to Homo sapiens methylmalonyl Coenzyme A mutase (MUT), nuclear gene encoding mitochondrial protein, mRNA [OS=Homo sapiens]	3	MUT	69513.2	91992.7	33481	50467.8	52038.4	14919.1	-
B2R6K4	High	cDNA, FLJ92996, highly similar to Homo sapiens guanine nucleotide binding protein (G protein), beta polypeptide 1 (GNB1), mRNA [OS=Homo sapiens]	6	GNB1	1.84275e+06	1.79251e+06	2.03176e+06	1.33787e+06	1.01399e+06	905354	-
B2R6V9	High	cDNA, FLJ93141, highly similar to Homo sapiens coagulation factor XIII, A1 polypeptide (F13A1), mRNA [OS=Homo sapiens]	6	F13A1	47744.6	12134.3	55708.8	34663.4	6864.13	24823.8	-
B2R761	High	cDNA, FLJ93299, highly similar to Homo sapiens sterol carrier protein 2 (SCP2), mRNA [OS=Homo sapiens]	3	SCP2	19619.9	21325	27516.9	14244.4	12063.1	12261.5	-
B2R7B5	High	cDNA, FLJ93365, highly similar to Homo sapiens KH domain containing, RNA binding, signal transduction associated 1 (KHDRBS1), mRNA [OS=Homo sapiens]	2	KHDRBS1	17205.8	46130.1	15424.9	12491.7	26094.8	6873.33	-
B2R7F8	High	Plasminogen [OS=Homo sapiens]	7	PLG	36615	184909	54001.3	26583.2	104599	24063	-
B2R7I9	High	cDNA, FLJ93464, highly similar to Homo sapiens RAB7, member RAS oncogene family-like 1 (RAB7L1), mRNA [OS=Homo sapiens]	2	RAB7L1; RAB29	109585	108102	78054.9	79560.9	61151	34781.3	-
B2R7S4	High	cDNA, FLJ93581, highly similar to Homo sapiens galactose-3-O-sulfotransferase 1 (GAL3ST1), mRNA [OS=Homo sapiens]	6	GAL3ST1	148827	698904	223977	108051	395356	99804.2	-
B2R7T8	High	cDNA, FLJ93598, highly similar to Homo sapiens capping protein (actin filament) muscle Z-line, beta (CAPZB), mRNA [OS=Homo sapiens]	2	CAPZB	141911	152135	125976	103030	86059.9	56134.9	-
B2R815	High	cDNA, FLJ93695, highly similar to Homo sapiens serpin peptidase inhibitor, clade A (alpha-1 antiproteinase, antitrypsin), member 4 (SERPINA4), mRNA [OS=Homo sapiens]	4	SERPINA4	135720	188583	105125	98535.3	106678	46843.8	-
B2R853	High	cDNA, FLJ93744, highly similar to Homo sapiens keratin 6E (KRT6E), mRNA [OS=Homo sapiens]	1	KRT6C	228166	698837	235794	165653	395318	105070	-
B2R888	High	Monocyte differentiation antigen CD14 [OS=Homo sapiens]	3	CD14	15072.6	65451	69715.6	10943	37024.3	31065.3	-
B2R8I2	High	cDNA, FLJ93914, highly similar to Homo sapiens histidine-rich glycoprotein (HRG), mRNA [OS=Homo sapiens]	5	HRG	313924	907159	306769	227914	513161	136696	-
B2R8R5	High	cDNA, FLJ94025, highly similar to Homo sapiens tripartite motif-containing 28 (TRIM28), mRNA [OS=Homo sapiens]	6	TRIM28	48146.6	99049.8	58790	34955.3	56030.4	26196.8	Oxidation [P426]
B2R944	High	cDNA, FLJ94203, highly similar to Homo sapiens stomatin (EPB72)-like 3 (STOML3), mRNA [OS=Homo sapiens]	1	STOML3	59422.6	43004.5	176942	43141.9	24326.7	78845.4	-
B2R9K8	High	cDNA, FLJ94440, highly similar to Homo sapiens chaperonin containing TCP1, subunit 6A (zeta 1)(CCT6A), mRNA [OS=Homo sapiens]	6	CCT6A	178692	140412	204066	129734	79428.4	90931.8	-
B2R9V7	High	Superoxide dismutase [Cu-Zn] [OS=Homo sapiens]	5	SOD3	245109	787216	504163	177954	445312	224655	-
B2RA39	High	cDNA, FLJ94686, highly similar to Homo sapiens complement factor H-related 5 (CFHL5), mRNA [OS=Homo sapiens]	5	CFHR5	206050	254903	162728	149596	144193	72511.6	-
B2RAZ0	High	chloride intracellular channel protein [OS=Homo sapiens]	1	CLIC5	14814.4	28912.3	14751.8	10755.5	16355.1	6573.4	-
B2RBD5	High	tubulin beta chain [OS=Homo sapiens]	1	TUBB3	34937.1	21774.2	36978.7	25364.9	12317.2	16477.7	Oxidation [P272; K297]
B2RBJ5	High	alanine--glyoxylate aminotransferase 2 [OS=Homo sapiens]	10	AGXT2	251148	277713	215864	182338	157097	96189	-
B2RCQ6	High	cDNA, FLJ96222, highly similar to Homo sapiens betaine-homocysteine methyltransferase (BHMT), mRNA [OS=Homo sapiens]	10	BHMT	2.6514e+06	763216	2.77716e+06	1.92496e+06	431736	1.2375e+06	-
B2RCW4	High	cDNA, FLJ96336, highly similar to Homo sapiens zinc finger and BTB domain containing 20 (ZBTB20),mRNA [OS=Homo sapiens]	4	ZBTB20	43051.2	21112.7	-	31255.9	11943	-	-
B2RD96	High	cDNA, FLJ96514 [OS=Homo sapiens]	3	NUDT16L1	76765.3	41546.9	42920.7	55732.9	23502.2	19125.5	-
B2RDE1	High	cDNA, FLJ96568, highly similar to Homo sapiens tropomyosin 3 (TPM3), mRNA [OS=Homo sapiens]	5	TPM3	323288	205970	191506	234712	116513	85335.3	-
B2RDW0	High	cDNA, FLJ96792, highly similar to Homo sapiens calmodulin 2 (phosphorylase kinase, delta) (CALM2), mRNA [OS=Homo sapiens]	6	CALM2	169953	1.63273e+06	1.06128e+06	123389	923605	472908	-
B2RMS9	High	Inter-alpha (Globulin) inhibitor H4 (Plasma Kallikrein-sensitive glycoprotein) [OS=Homo sapiens]	4	ITIH4	67964.2	73919.4	89299.9	49343.2	41814.7	39792	-
B2RTX6	High	Col4a6 protein [OS=Homo sapiens]	14	COL4A6	3.21478e+06	1.1327e+06	3.35433e+06	2.33398e+06	640748	1.49469e+06	Oxidation [P99; P108; P111; P114; P116; P303; P312; P313; P949; P951; P955; P957; P1125; P1128; P1131; P1248; P1250; P1253; P1254; P1257; P1259; P1269; P1272; P1275; P1277; P1494; P1497; P1504; K1615]
B2ZZ86	High	collagen type V alpha 1 [OS=Homo sapiens]	5	COL5A1	966273	301800	581200	701531	170722	258983	Oxidation [P501; P504; P507; P513; P515; P516; P650; P653; P654; P656; P657; P870; P873; P876; P956; P960; P962; K963; P992; P993; P995; P996; P1017; P1019; P1020; P1022; P1023; P1029; P1431; K1433; P1434; P1436]
B3CJD5	Medium	V-myc myelocytomatosis viral oncogene homolog [OS=Homo sapiens]	1	MYC	7083.4	-	9496.84	5142.67	-	4231.79	Oxidation [P12; P17]
B3KM26	High	cDNA FLJ10050 fis, clone HEMBA1001257, highly similar to Alpha-methylacyl-CoA racemase [OS=Homo sapiens]	4	AMACR	50904.8	45193.8	26807	36957.8	25565.2	11945.2	-
B3KM34	High	cDNA FLJ10132 fis, clone HEMBA1003046, highly similar to Mitochondrial-processing peptidase subunit beta, mitochondrial [OS=Homo sapiens]	1	PMPCB	43844.6	45191.8	17956.8	31832	25564.1	8001.57	-
B3KM80	High	nucleolin, isoform CRA_c [OS=Homo sapiens]	4	NCL	55101.6	234723	15751.9	40004.7	132778	7019.06	-
B3KM97	High	cDNA FLJ10554 fis, clone NT2RP2002385, highly similar to Synaptic glycoprotein SC2 [OS=Homo sapiens]	2	TECR	36400.3	26290.8	29150.2	26427.3	14872.2	12989.3	-
B3KMH8	High	Autophagy protein 5 [OS=Homo sapiens]	1	ATG5	15495.5	10829.2	10840.2	11250	6125.87	4830.39	-
B3KMK7	High	cDNA FLJ11291 fis, clone PLACE1009659, highly similar to Nck-associated protein 1 [OS=Homo sapiens]	1	NCKAP1	19085.4	-	28139.5	13856.4	-	12538.9	-
B3KMV5	High	cDNA FLJ12728 fis, clone NT2RP2000040, highly similar to Protein FAM62A [OS=Homo sapiens]	1	ESYT1	14794.8	8978.72	17554.2	10741.3	5079.08	7822.17	-
B3KNZ3	High	LIM and senescent cell antigen-like-containing domain protein [OS=Homo sapiens]	3	LIMS2	191059	136752	136109	138712	77357.6	60650	-
B3KP64	High	amnionless homolog (mouse), isoform CRA_a [OS=Homo sapiens]	1	AMN	34402.9	30721.8	-	24977.1	17378.7	-	-
B3KPZ8	High	cDNA FLJ32530 fis, clone SMINT2000185, highly similar to TRANSKETOLASE [OS=Homo sapiens]	1	TKT	45314	-	25741	32898.8	-	11470.2	-
B3KQC8	High	cDNA FLJ90233 fis, clone NT2RM2000514, highly similar to F-box only protein 21 [OS=Homo sapiens]	1	FBXO21	20888.5	14250.1	-	15165.4	8060.98	-	-
B3KQQ9	High	cDNA PSEC0048 fis, clone NT2RP2000028, highly similar to Serine protease 23 [OS=Homo sapiens]	4	PRSS23	315684	210391	168433	229192	119014	75053.9	-
B3KQT9	High	Protein disulfide-isomerase [OS=Homo sapiens]	3	PDIA3	206564	237804	123584	149969	134521	55069.2	-
B3KR70	High	cDNA FLJ33764 fis, clone BRCOC2000360, highly similar to Vacuolar ATP synthase subunit S1 [OS=Homo sapiens]	1	ATP6AP1	55233.3	28730.6	41768.7	40100.3	16252.3	18612.2	-
B3KRN4	High	cDNA FLJ34625 fis, clone KIDNE2015244, highly similar to Serine protease HTRA1 [OS=Homo sapiens]	2	HTRA1	27569.8	23758	19829.8	20016.2	13439.4	8836.16	-
B3KTN5	High	cDNA FLJ38538 fis, clone HCHON2001407, highly similar to LanC-like protein 2 [OS=Homo sapiens]	5	LANCL2	79614.8	57304.5	40320.1	57801.8	32416	17966.6	-
B3KTV4	High	adenylosuccinate synthetase [OS=Homo sapiens]	1	ADSSL1	22172.4	34264.3	19946.5	16097.6	19382.6	8888.14	-
B3KUH9	High	cDNA FLJ39928 fis, clone SPLEN2021273, highly similar to Calpain-2 catalytic subunit [OS=Homo sapiens]	1	CAPN2	26873.4	16402.9	14516.8	19510.5	9278.79	6468.68	-
B3KUZ8	High	aspartate aminotransferase [OS=Homo sapiens]	11	GOT2	1.27609e+06	686144	783985	926467	388137	349344	-
B3KX15	High	cDNA FLJ44468 fis, clone UTERU2026025, moderately similar to SPLICING FACTOR, ARGININE/SERINE-RICH 2 [OS=Homo sapiens]	1	SRSF2	46984.8	52101.5	49741	34111.8	29472.8	22164.6	-
B3KX19	High	cDNA FLJ44500 fis, clone UTERU3000828, highly similar to 116 kDa U5 small nuclear ribonucleoprotein component [OS=Homo sapiens]	5	EFTUD2	7495.35	91835.8	10763.4	5441.75	51949.6	4796.19	-
B3KXW5	High	cDNA FLJ46199 fis, clone TESTI4007965, highly similar to AP-1 complex subunit gamma-1 [OS=Homo sapiens]	2	AP1G1	25350.4	13877.1	16262	18404.8	7850	7246.33	-
B3KY04	High	cDNA FLJ46506 fis, clone THYMU3030752, highly similar to BTB/POZ domain-containing protein KCTD12 [OS=Homo sapiens]	2	KCTD12	20363.5	26488.9	23815.8	14784.2	14984.2	10612.3	-
B3KY28	High	cDNA FLJ46689 fis, clone TRACH3012106, highly similar to Band 4.1-like protein 3 [OS=Homo sapiens]	4	EPB41L3	458840	183839	588853	333126	103994	262393	Oxidation [P244]
B4DDN8	High	cDNA FLJ50437, highly similar to Histidyl-tRNA synthetase homolog [OS=Homo sapiens]	2	HARS2	22973.4	16863.6	20329.7	16679.1	9539.38	9058.92	-
B4DDQ2	High	biglycan [OS=Homo sapiens]	15	BGN	1.70591e+07	9.64987e+06	4.80607e+06	1.23852e+07	5.45873e+06	2.14159e+06	Oxidation [P160; P288]
B4DDU6	High	cDNA FLJ50442, highly similar to T-complex protein 1 subunit epsilon [OS=Homo sapiens]	4	CCT5	125978	51217.2	118284	91462.4	28972.5	52707.3	-
B4DDY9	High	cDNA FLJ56490, highly similar to Serpin I2 [OS=Homo sapiens]	1	SERPINI2	36106.2	19928.2	41142.4	26213.7	11273	18333.1	-
B4DE78	High	cDNA FLJ52141, highly similar to 14-3-3 protein gamma [OS=Homo sapiens]	1	YWHAG	25804.7	14173.2	28504.6	18734.7	8017.5	12701.7	-
B4DE91	High	cDNA FLJ55534, highly similar to 4-trimethylaminobutyraldehyde dehydrogenase [OS=Homo sapiens]	2	ALDH9A1	33337.4	26455.5	50681.6	24203.5	14965.4	22583.7	-
B4DEA8	High	cDNA FLJ56425, highly similar to Very-long-chain specific acyl-CoAdehydrogenase, mitochondrial [OS=Homo sapiens]	18	-	1.1381e+06	817127	1.13756e+06	826278	462232	506898	-
B4DEN6	High	cDNA FLJ55549, highly similar to 3-ketoacyl-CoA thiolase, peroxisomal [OS=Homo sapiens]	8	ACAA1	562013	240485	259774	408031	136037	115756	-
B4DEQ0	High	cDNA FLJ59482, highly similar to Electron transfer flavoprotein-ubiquinone oxidoreductase, mitochondrial [OS=Homo sapiens]	7	ETFDH	253910	236159	177508	184343	133590	79097.7	-
B4DEX8	High	S-adenosylmethionine synthase [OS=Homo sapiens]	3	MAT2A	22875.6	167478	17282.9	16608.1	94738.7	7701.26	-
B4DF70	High	cDNA FLJ60461, highly similar to Peroxiredoxin-2 [OS=Homo sapiens]	6	PRDX2	1.41448e+06	537660	773004	1.02694e+06	304143	344450	-
B4DFA8	High	Oxysterol-binding protein [OS=Homo sapiens]	1	OSBP2	91781	73882.5	69583	66634.6	41793.8	31006.2	Oxidation [P846; P854; P861]
B4DFE9	High	cDNA FLJ59619, highly similar to Epoxide hydrolase 2 [OS=Homo sapiens]	2	EPHX2	61515	50829.8	34598.2	44661	28753.4	15417	-
B4DFG0	High	Protein DEK [OS=Homo sapiens]	3	DEK	95080	263757	136779	69029.7	149202	60948.7	-
B4DFL1	High	Dihydrolipoyl dehydrogenase [OS=Homo sapiens]	9	DLD	411100	534125	422286	298466	302144	188171	Oxidation [P310]
B4DH39	High	cDNA FLJ57028, highly similar to Long-chain-fatty-acid--CoA ligase 4 [OS=Homo sapiens]	4	ACSL4	43326	44969.7	13003.3	31455.5	25438.4	5794.27	-
B4DHD8	High	cDNA FLJ56694, highly similar to Cytoplasmic dynein 1 light intermediate chain 2 [OS=Homo sapiens]	1	DYNC1LI2	23953.6	27861.4	34706	17390.7	15760.6	15465	-
B4DHY8	High	Elongation factor Ts, mitochondrial [OS=Homo sapiens]	4	TSFM	32007.6	126522	15104.2	23238.1	71570.9	6730.43	-
B4DI38	High	Adenylyl cyclase-associated protein [OS=Homo sapiens]	2	CAP1	83962.9	34978	124884	60958.5	19786.3	55648.3	-
B4DIX0	High	cDNA FLJ50778, highly similar to Protein flightless-1 homolog [OS=Homo sapiens]	2	FLII	21667.3	18137.5	29624.8	15730.8	10260	13200.8	Oxidation [K272; P279]
B4DJ30	High	cDNA FLJ61290, highly similar to Neutral alpha-glucosidase AB [OS=Homo sapiens]	3	-	222592	20046.5	23123.7	161606	11339.9	10303.9	-
B4DJB4	High	Isocitrate dehydrogenase [NAD] subunit, mitochondrial [OS=Homo sapiens]	5	IDH3A	260597	161100	136182	189198	91130.7	60682.9	-
B4DJK9	Medium	Perilipin [OS=Homo sapiens]	1	PLIN2	32394.9	26226.8	63445.7	23519.3	14836	28271.4	-
B4DKI9	High	cDNA FLJ54799, highly similar to Mitochondrial 28S ribosomal protein S27 [OS=Homo sapiens]	3	MRPS27	42185	16598.5	17867.4	30627.1	9389.45	7961.73	-
B4DKJ4	High	cDNA FLJ57738, highly similar to Translationally-controlled tumor protein [OS=Homo sapiens]	1	TPT1	9018.88	47546.1	-	6547.87	26895.9	-	-
B4DL06	High	cDNA FLJ59565, highly similar to Beta-catenin [OS=Homo sapiens]	3	CTNNB1	85749.2	126315	102899	62255.4	71453.8	45852	-
B4DL07	High	cDNA FLJ53353, highly similar to ATP-binding cassette sub-family D member 3 [OS=Homo sapiens]	9	ABCD3	140563	220601	188705	102051	124789	84087.1	-
B4DLA1	High	cDNA FLJ53453, highly similar to EH-domain-containing protein 2 [OS=Homo sapiens]	4	EHD2	70355.8	-	45498	51079.6	-	20273.9	-
B4DLJ3	High	cDNA FLJ51495, highly similar to ADP-ribosylation factor 5 [OS=Homo sapiens]	1	ARF5	27591.6	-	36173.3	20032	-	16118.8	-
B4DLN1	High	cDNA FLJ60124, highly similar to Mitochondrial dicarboxylate carrier [OS=Homo sapiens]	3	-	104352	171601	108386	75761.6	97070.9	48296.6	-
B4DLV7	High	Rab GDP dissociation inhibitor [OS=Homo sapiens]	3	GDI2	107179	35873.4	123137	77813.5	20292.8	54870.1	-
B4DM74	High	60S ribosomal protein L18a [OS=Homo sapiens]	5	RPL18A	550326	422464	827407	399546	238979	368692	-
B4DM97	High	cDNA FLJ55002, highly similar to Alpha-centractin [OS=Homo sapiens]	3	ACTR1A	117957	33487.3	156104	85639.2	18943.1	69560.1	-
B4DN28	High	cDNA FLJ54639, highly similar to Integrin alpha-8 [OS=Homo sapiens]	8	ITGA8	150889	266465	442221	109548	150734	197054	-
B4DN60	High	cDNA FLJ52703, highly similar to Asparaginyl-tRNA synthetase, cytoplasmic [OS=Homo sapiens]	5	NARS	224602	32551.3	115532	163065	18413.6	51481.3	-
B4DN72	High	cDNA FLJ55910, highly similar to Keratin, type II cuticular Hb6 [OS=Homo sapiens]	11	KRT86	1.89823e+06	414257	219739	1.37815e+06	234337	97915.6	-
B4DN85	High	E3 ubiquitin-protein ligase [OS=Homo sapiens]	2	ITCH	112543	-	90897.5	81708.5	-	40503.9	-
B4DN99	High	cDNA FLJ58317, highly similar to Adaptor-relatedprotein complex 1 mu-1 subunit [OS=Homo sapiens]	2	AP1M1	29722.9	20143.4	47827.8	21579.3	11394.7	21312.1	-
B4DNB9	High	cDNA FLJ53069, highly similar to AP-2 complex subunit mu-1 [OS=Homo sapiens]	9	AP2M1	762684	598535	1.01349e+06	553722	338579	451611	Oxidation [P409; P410]
B4DNH1	High	Profilin [OS=Homo sapiens]	4	PFN2	77091.1	167536	33126.3	55969.5	94771.7	14761.1	-
B4DNL5	High	Protein disulfide-isomerase [OS=Homo sapiens]	6	P4HB	110673	64608.2	42998.9	80350.5	36547.5	19160.3	-
B4DNW4	High	cDNA FLJ51915, highly similar to Aquaporin-1 [OS=Homo sapiens]	2	AQP1	467994	873382	965453	339772	494054	430206	-
B4DP88	High	Serine hydroxymethyltransferase [OS=Homo sapiens]	2	SHMT2	146593	68673.3	123633	106429	38847	55090.8	-
B4DPC7	High	cDNA FLJ55124, highly similar to Plasma serine protease inhibitor [OS=Homo sapiens]	7	SERPINA5	956680	132116	366927	694567	74735	163503	-
B4DPK2	High	cDNA FLJ59729, highly similar to DnaJ homolog subfamily C member 11 [OS=Homo sapiens]	1	DNAJC11	24597.9	21049.3	33578.4	17858.5	11907.1	14962.5	-
B4DPY2	High	cDNA FLJ59286, highly similar to Pre-mRNA-processing factor 40 homolog A [OS=Homo sapiens]	1	PRPF40A	14911.1	21525.9	11752.4	10825.7	12176.8	5236.89	-
B4DPZ4	High	cDNA FLJ60782, highly similar to Rho-GTPase-activating protein 1 [OS=Homo sapiens]	2	ARHGAP1	56017.5	46505.4	79950.2	40669.7	26307.1	35625.8	-
B4DPZ5	High	cDNA FLJ53495, highly similar to Polymerase I and transcript release factor [OS=Homo sapiens]	5	PTRF; CAVIN1	1.02378e+06	80524.9	654094	743283	45551.3	291464	-
B4DQC5	High	cDNA FLJ58039, highly similar to Golgi-associated plant pathogenesis-related protein 1 [OS=Homo sapiens]	2	GLIPR2	40560.8	38632.8	49135.5	29447.9	21853.8	21894.8	-
B4DR25	High	Oxysterol-binding protein [OS=Homo sapiens]	2	OSBP	39442.4	23193.6	21144.9	28635.9	13120.2	9422.16	-
B4DRA0	High	cDNA FLJ58459, highly similar to RNA-binding region-containing protein 2 [OS=Homo sapiens]	5	RBM39	20260	189315	-	14709.1	107092	-	-
B4DRG0	High	cDNA FLJ51764, highly similar to Histone deacetylase 1 [OS=Homo sapiens]	1	HDAC1	20667.5	27414.1	-	15004.9	15507.6	-	-
B4DRW1	High	cDNA FLJ55805, highly similar to Keratin, type II cytoskeletal 4 [OS=Homo sapiens]	10	KRT4	149286	3.7534e+06	819130	108385	2.12322e+06	365005	-
B4DSL0	High	cDNA FLJ54857, highly similar to RNA 3'-terminal phosphate cyclase [OS=Homo sapiens]	1	RTCA	-	22880	8470.59	-	12942.8	3774.5	-
B4DSN3	High	cDNA FLJ60345, highly similar to Protein transport protein Sec24C [OS=Homo sapiens]	3	SEC24C	78729	-	36273.2	57158.6	-	16163.3	-
B4DT77	High	Annexin [OS=Homo sapiens]	7	ANXA7	286048	253982	232852	207676	143672	103759	-
B4DTA2	High	cDNA FLJ60148, highly similar to Homo sapiens heterogeneous nuclear ribonucleoprotein D-like (HNRPDL), transcript variant 2, mRNA [OS=Homo sapiens]	1	HNRNPDL; HNRPDL	51366.4	31623.1	-	37292.9	17888.6	-	-
B4DTR4	High	cDNA FLJ55347, highly similar to EH-domain-containing protein 1 [OS=Homo sapiens]	1	EHD1	19835.9	22291	22539.2	14401.2	12609.6	10043.5	-
B4DTS5	High	cDNA FLJ58882, highly similar to 26S proteasome non-ATPase regulatory subunit 11 [OS=Homo sapiens]	1	PSMD11	32923.4	-	23691.7	23903	-	10557	-
B4DU42	High	cDNA FLJ56153, highly similar to Homo sapiens transforming growth factor beta regulator 4 (TBRG4), transcript variant 1, mRNA [OS=Homo sapiens]	5	TBRG4	7455.05	46381.4	12343.4	5412.5	26237	5500.21	-
B4DUQ1	High	cDNA FLJ54552, highly similar to Heterogeneous nuclear ribonucleoprotein K [OS=Homo sapiens]	6	HNRNPK	440115	484351	264531	319531	273987	117875	-
B4DUV1	High	Fibulin-1 [OS=Homo sapiens]	2	FBLN1	-	76509.2	54646	-	43279.7	24350.3	-
B4DV16	High	cDNA FLJ54503, highly similar to Acyl-coenzyme A thioesterase 1 [OS=Homo sapiens]	6	ACOT1	171493	175970	350885	124507	99542.5	156355	-
B4DV28	High	cDNA FLJ54170, highly similar to Cytosolic nonspecific dipeptidase [OS=Homo sapiens]	6	CNDP2	229220	196008	135934	166418	110878	60572	-
B4DVP2	High	cDNA FLJ57208, highly similar to 5'-AMP-activated protein kinase subunit beta-1 [OS=Homo sapiens]	1	PRKAB1	52270.2	15289.6	15249.8	37949.1	8648.99	6795.3	-
B4DWC4	High	chloride intracellular channel protein [OS=Homo sapiens]	4	CLIC4	279895	402964	279354	203209	227948	124480	Oxidation [K164]
B4DWH5	High	cDNA FLJ53224, highly similar to Calpain-1 catalytic subunit [OS=Homo sapiens]	2	CAPN1	45993.3	31069.2	51110.7	33392	17575.2	22774.9	-
B4DWH7	High	cDNA FLJ57632, highly similar to Vacuolar ATP synthase subunit B, kidney isoform [OS=Homo sapiens]	2	ATP6V1B1	52863.8	36676.8	28149.6	38380	20747.3	12543.5	-
B4DWS6	High	cDNA FLJ61181, highly similar to Homo sapiens hydroxysteroid (17-beta) dehydrogenase 12 (HSD17B12), mRNA [OS=Homo sapiens]	1	HSD17B12	21244.6	21417.7	37680.1	15423.9	12115.5	16790.2	-
B4DX78	High	cDNA FLJ55484, highly similar to ATP-dependent RNA helicase DDX39 [OS=Homo sapiens]	1	DDX39A	207345	206253	143556	150536	116673	63968.5	-
B4DXF3	High	cDNA FLJ57650, highly similar to Bleomycin hydrolase [OS=Homo sapiens]	2	BLMH	165528	89504.4	157973	120176	50630.8	70392.6	-
B4DXW6	High	cDNA FLJ50285, highly similar to Arginyl-tRNA synthetase [OS=Homo sapiens]	5	RARS	96266.5	81249.2	78956.2	69891.2	45961	35182.9	-
B4DY08	High	Heterogeneous nuclear ribonucleoproteins C1/C2 [OS=Homo sapiens]	6	HNRNPC	266509	923044	240414	193490	522147	107129	-
B4DY64	High	cDNA FLJ52132, highly similar to Catechol-O-methyltransferasedomain-containing protein 1 [OS=Homo sapiens]	1	COMTD1	22022.1	16159.8	34088.8	15988.5	9141.24	15190	-
B4DZK8	High	cDNA FLJ61192, highly similar to Erythrocyte band 7 integral membrane protein [OS=Homo sapiens]	6	STOM	303833	190070	965732	220588	107519	430330	-
B4E0C7	High	cDNA FLJ58558, highly similar to Tripeptidyl-peptidase 1 [OS=Homo sapiens]	3	TPP1	289218	117090	189083	209977	66235.5	84255.6	-
B4E0S6	High	cDNA FLJ55635, highly similar to pre-mRNA-splicing factorATP-dependent RNA helicase DHX15 [OS=Homo sapiens]	2	DHX15	26894.7	47648.7	18614.4	19526.1	26953.9	8294.56	-
B4E0X1	High	Beta-2-microglobulin [OS=Homo sapiens]	2	B2M	337679	445063	239489	245161	251763	106716	-
B4E1J8	High	cDNA FLJ56285, highly similar to ADP-ribosylation factor-like protein 8B [OS=Homo sapiens]	2	ARL8B	88472.3	76372.3	81272	64232.5	43202.2	36214.8	-
B4E1S3	High	cDNA FLJ57860, highly similar to Transmembrane protein 109 [OS=Homo sapiens]	1	TMEM109	149552	112006	325119	108577	63359.4	144873	-
B4E2A6	High	cDNA FLJ55508, highly similar to Sad1/unc-84-like protein 2 [OS=Homo sapiens]	11	SUN2	72027.1	452268	256700	52292.9	255839	114385	-
B4E2V9	High	cDNA FLJ51773, highly similar to Homo sapiens interleukin 22 receptor, alpha 1 (IL22RA1), mRNA [OS=Homo sapiens]	1	IL22RA1	29401.6	22252.3	54821.7	21346.1	12587.7	24428.6	-
B4E320	High	cDNA FLJ50065, highly similar to MAM domain-containing protein 2 [OS=Homo sapiens]	10	MAMDC2	113316	132433	97197.2	82269.5	74914.6	43311.1	-
B4E324	High	cDNA FLJ60397, highly similar to Lysosomal protective protein [OS=Homo sapiens]	1	CTSA	24397.5	12732.7	19873.2	17713	7202.62	8855.5	-
B4E341	Medium	cDNA FLJ50373, highly similar to Protein ADP-ribosylarginine hydrolase [OS=Homo sapiens]	1	ADPRH	16385.2	16714.7	136506	11895.9	9455.15	60826.9	Oxidation [P62; P67]
B4E364	High	cDNA FLJ54954, highly similar to Ras-related protein Ral-B [OS=Homo sapiens]	1	RALB	21719.5	30972.7	21758	15768.7	17520.6	9695.36	-
B5BU25	High	U2 small nuclear RNA auxiliary factor 2 isoform b [OS=Homo sapiens]	5	U2AF2	44337.2	45429.8	-	32189.6	25698.7	-	-
B5BUB1	High	RuvB-like helicase [OS=Homo sapiens]	5	RUVBL1	140706	104293	202590	102155	58996.4	90273.9	-
B5BUE6	High	ATP-dependent RNA helicase DDX5 [OS=Homo sapiens]	6	DDX5	564761	723234	249417	410026	409118	111140	-
B5MDF5	High	GTP-binding nuclear protein RAN [OS=Homo sapiens]	2	RAN	128003	95541.2	118296	92932.3	54045.7	52712.7	-
B7XGC2	High	MHC class I antigen (Fragment) OS=Homo sapiens GN=HLA-A PE=3 SV=1	1	HLA-A	31660.7	41074.3	-	22986.2	23234.9	-	-
B7Z539	High	cDNA FLJ56954, highly similar to Inter-alpha-trypsin inhibitor heavy chain H1 [OS=Homo sapiens]	3	ITIH1	24733.9	73887.4	25158.3	17957.3	41796.6	11210.5	-
B7Z556	High	cDNA FLJ56822, highly similar to Alpha-2-HS-glycoprotein [OS=Homo sapiens]	2	AHSG	7883.88	154914	54511.9	5723.84	87631.4	24290.5	-
B7Z6K5	High	cDNA FLJ54805, highly similar to Ionized calcium-binding adapter molecule 2 [OS=Homo sapiens]	2	AIF1L	203031	80683.2	65813.5	147404	45640.8	29326.5	-
B7Z6L0	High	Annexin [OS=Homo sapiens]	6	ANXA11	99956.8	117242	107503	72570.4	66321.4	47903.6	-
B7Z6T9	Medium	cDNA FLJ50237, highly similar to Homo sapiens fibulin 2 (FBLN2), transcript variant 1, mRNA [OS=Homo sapiens]	1	FBLN2	8140.83	11642.5	17040.9	5910.38	6585.91	7593.42	-
B7Z722	High	tropomyosin 1 (alpha), isoform CRA_i [OS=Homo sapiens]	1	TPM1	267689	194094	114931	194347	109795	51213.3	-
B7Z7F1	High	cDNA FLJ59096, highly similar to Acyl-CoA dehydrogenase family member 8, mitochondrial [OS=Homo sapiens]	1	ACAD8	39447	33462.3	-	28639.2	18928.9	-	-
B7Z992	High	cDNA FLJ53698, highly similar to Gelsolin [OS=Homo sapiens]	15	GSN	4.41154e+06	2.53015e+06	3.01716e+06	3.20286e+06	1.43126e+06	1.34445e+06	Oxidation [P253]
B7ZA94	High	cDNA, FLJ79108, highly similar to Complement component C8 beta chain [OS=Homo sapiens]	10	C8B	305779	186634	147913	222001	105575	65910.1	-
B7ZAF6	High	Succinate--CoA ligase [ADP-forming] subunit beta, mitochondrial [OS=Homo sapiens]	1	SUCLA2	32630.5	79589.9	32943.7	23690.3	45022.4	14679.7	-
B7ZAL1	High	cDNA, FLJ79225, highly similar to Alcohol dehydrogenase 6 [OS=Homo sapiens]	1	ADH6	12814.3	11568.5	-	9303.42	6544.04	-	-
B7ZB80	High	cDNA, FLJ79444, highly similar to 2-oxoisovalerate dehydrogenase subunit beta, mitochondrial [OS=Homo sapiens]	1	BCKDHB	31552.8	25214.6	18186.1	22907.9	14263.4	8103.74	-
B7ZKQ8	High	Podocalyxin [OS=Homo sapiens]	3	PODXL	413926	196309	610883	300518	111048	272210	-
B7ZLM6	High	X-prolyl aminopeptidase (Aminopeptidase P) 2, membrane-bound [OS=Homo sapiens]	2	XPNPEP2	48214.3	22833.8	-	35004.5	12916.6	-	-
B7ZLP2	High	HSPA12B protein [OS=Homo sapiens]	6	HSPA12B	29724.8	148819	85932.8	21580.7	84183.8	38291.7	-
B7ZW00	High	COL6A3 protein [OS=Homo sapiens]	1	COL6A3	140042	60799.5	-	101673	34393	-	Oxidation [K109; P205; P1301; K1306; P1457; P1550; P1562; K1563; P1571; P1575; P1625; P1628; P1631; P1632; P1742]
B8ZZ51	High	Malate dehydrogenase, cytoplasmic [OS=Homo sapiens]	4	MDH1	168912	72172.5	136027	122633	40826.5	60613.6	-
B8ZZQ4	High	pentatricopeptide repeat domain-containing protein 3, mitochondrial [OS=Homo sapiens]	1	PTCD3	198167	260123	189658	143873	147146	84511.8	-
B9EG90	High	topoisomerase (DNA) I [OS=Homo sapiens]	4	TOP1	163525	94654	171445	118722	53543.8	76395.8	-
B9EK55	High	ACAN protein [OS=Homo sapiens]	4	ACAN	20376.1	42398.3	-	14793.4	23983.8	-	-
B9ZVT1	High	RNA-binding protein 12B [OS=Homo sapiens]	3	RBM12B	8319.87	27326.3	-	6040.37	15457.9	-	-
C7C5T5	High	Linker for activation of T-cells family member 1 [OS=Homo sapiens]	1	LAT	1.05208e+07	1.53881e+07	1.23e+07	7.63829e+06	8.70473e+06	5.48087e+06	Oxidation [P33; P46]
C8CHS3	High	Truncated extracellular matrix protein 1 [OS=Homo sapiens]	2	ECM1	42921.3	43152.4	38852.7	31161.6	24410.4	17312.8	-
C9IZG4	High	Protein CutA [OS=Homo sapiens]	1	CUTA	57803.6	48051.8	46102.4	41966.5	27181.9	20543.2	-
C9IZS4	High	Exportin-1 [OS=Homo sapiens]	1	XPO1	30059.3	19699.6	40487.3	21823.5	11143.7	18041.2	-
C9J7B1	High	Protein NipSnap homolog 2 [OS=Homo sapiens]	1	NIPSNAP2	61437.9	24415	39277.3	44605	13811.1	17502	-
C9J8H1	High	V-type proton ATPase subunit E 1 [OS=Homo sapiens]	1	ATP6V1E1	60864.8	86823.2	123015	44188.9	49114.1	54815.5	-
C9JEU5	High	Fibrinogen gamma chain [OS=Homo sapiens]	14	FGG	613332	1.47514e+06	1.37587e+06	445290	834459	613086	Oxidation [P96; P102; K300]
C9JF17	High	apolipoprotein D [OS=Homo sapiens]	3	APOD	72320.6	46046.5	15210	52506	26047.6	6777.56	-
C9JH92	High	Quinone oxidoreductase [OS=Homo sapiens]	5	CRYZ	193423	90676	124303	140428	51293.5	55389.5	-
C9JIG9	High	Serine/threonine-protein kinase OSR1 [OS=Homo sapiens]	1	OXSR1	25471	40935.4	-	18492.4	23156.3	-	-
C9JJV6	High	myeloid-associated differentiation marker [OS=Homo sapiens]	1	MYADM	97076.2	72504	180144	70479.1	41014	80272.2	-
C9JME2	High	FERM, RhoGEF and pleckstrin domain-containing protein 1 [OS=Homo sapiens]	2	FARP1	30788.6	28105.3	27059	22353.1	15898.6	12057.5	Oxidation [K733]
C9JP85	High	Nuclear respiratory factor 1 [OS=Homo sapiens]	2	NRF1	14872.1	27187.1	44764	10797.4	15379.2	19946.8	-
C9JQJ4	High	septin-2 [OS=Homo sapiens]	1	SEPTIN2	50696.4	19620.9	108977	36806.4	11099.2	48560.4	-
C9JQS9	High	propionyl-CoA carboxylase beta chain, mitochondrial [OS=Homo sapiens]	4	PCCB	68126.7	13931.2	36010.9	49461.2	7880.59	16046.5	-
C9JYN0	High	Synaptophysin-like protein 1 [OS=Homo sapiens]	2	SYPL1	58146.6	59057.4	109114	42215.4	33407.5	48621	-
C9JZR2	High	Catenin delta-1 [OS=Homo sapiens]	6	CTNND1	114869	335920	142424	83397.1	190023	63464	-
D3DNU8	High	Kininogen 1, isoform CRA_a [OS=Homo sapiens]	3	KNG1	54186.5	39012.9	60768.7	39340.4	22068.8	27078.5	-
D3DP78	High	aspartyl-tRNA synthetase, isoform CRA_b [OS=Homo sapiens]	4	DARS	27093.4	60137.8	85928	19670.3	34018.7	38289.5	-
D3DRR9	High	Chromosome 10 open reading frame 47, isoform CRA_b [OS=Homo sapiens]	1	C10orf47; PROSER2	235100	99631.8	714147	170687	56359.6	318224	-
D3DSM4	High	collagen, type XVIII, alpha 1, isoform CRA_d [OS=Homo sapiens]	28	COL18A1	9.66902e+07	9.69208e+07	7.01086e+07	7.01988e+07	5.48261e+07	3.12404e+07	Oxidation [P275; P279; P407; P410; P416; P428; P433; K434; P447; P448; P450; P453; P454; P456; P457; P459; P490; P492; P493; P495; P496; P499; P502; P505; P530; P531; P534; P537; P539; P540; P542; P543; P662; P665; P668; P927; P938; P940; P941; P943; P944; P946; P964; P966; P967; P969; P972; P973; P983; P984; P986; P987; P989; P990; P992; P993; P996; P998; P1006; P1008; P1009; P1011; P1012; P1014…
D3DSQ1	High	N-acylsphingosine amidohydrolase (acid ceramidase) 1, isoform CRA_c [OS=Homo sapiens]	3	ASAH1	100674	51967.7	101516	73091.1	29397	45235.5	-
D3DTH7	High	myosin IC, isoform CRA_a [OS=Homo sapiens]	1	MYO1C	12114.8	-	50043.8	8795.54	-	22299.5	-
D3DTX7	High	collagen, type I, alpha 1, isoform CRA_a [OS=Homo sapiens]	2	COL1A1	9.24124e+06	1.47914e+06	4.12688e+06	6.7093e+06	836720	1.83894e+06	Oxidation [P22; P24; P25; P30; P42; P43; P45; P48; P69; P72; P73; P79; P85; P91; P111; P112; P114; P124; K130; P136; P139; P145; P151; P192; P193; P195; P199; K202; P207; P220; P226; P228; P229; P231; P237; P238; P244; K247; P250; K256; P261; P262; P267; P270; P271; P273; P280; K283; P291; P292; P298; P306; P307; P309; P315; P316; P318; P319; P321; K324; P336; P340; P345; P346; P348; P349; P351; …
D3DVC4	High	nestin, isoform CRA_c [OS=Homo sapiens]	23	NES	1.13951e+07	4.22306e+06	1.21995e+07	8.27306e+06	2.3889e+06	5.43609e+06	Acetyl [N-Term]
D3DXJ4	High	N-ethylmaleimide-sensitive factor, isoform CRA_a [OS=Homo sapiens]	2	NSF	48154.8	61263.1	43535.3	34961.3	34655.3	19399.4	-
D3YTB1	High	60S ribosomal protein L32 [OS=Homo sapiens]	1	RPL32	76960.1	46822.3	73510.6	55874.4	26486.4	32756.3	-
D5FIG3	High	MHC class I antigen [OS=Homo sapiens]	1	HLA-A	91559.6	70339.7	323310	66473.9	39789.7	144067	Oxidation [P14; P16; P19]
D5KJA1	High	dehydrogenase/reductase (SDR family) member 4 like 2A3 [OS=Homo sapiens]	3	DHRS4L2	166949	198022	203623	121208	112017	90734.6	-
D6R9X7	High	DNA excision repair protein ERCC-6 [OS=Homo sapiens]	1	ERCC6	214143	276099	1.57375e+06	155472	156183	701265	Oxidation [P66]
D6RD17	High	Immunoglobulin J chain [OS=Homo sapiens]	3	JCHAIN	52890.4	107615	83886.3	38399.3	60875.6	37379.8	-
D6REM4	High	Casein kinase I isoform alpha [OS=Homo sapiens]	1	CSNK1A1	32953.5	15055.6	40614.4	23924.8	8516.65	18097.8	-
D6RER5	High	Septin-11 [OS=Homo sapiens]	2	SEPTIN11	42247.9	26236.6	133966	30672.7	14841.5	59695.4	-
D6RF35	High	vitamin D-binding protein [OS=Homo sapiens]	1	GC	53091.6	68346.7	50140.3	38545.4	38662.3	22342.5	-
D6RH26	Medium	Protein CXorf40A [OS=Homo sapiens]	1	-	324339	442910	374431	235476	250545	166847	-
D6RH31	High	Nephronectin [OS=Homo sapiens]	1	NPNT	2.6382e+06	6.75018e+06	6.92998e+06	1.91538e+06	3.81844e+06	3.088e+06	-
D9HTE9	High	plasma membrane citrate carrier [OS=Homo sapiens]	3	SLC25A1	233369	283081	227473	169430	160133	101362	-
D9I4E1	High	Xeroderma pigmentosum complementation group C [OS=Homo sapiens]	2	XPC	12433.8	64158.2	21371.2	9027.14	36293	9523.02	-
D9IWP9	High	beta-2-glycoprotein I [OS=Homo sapiens]	3	APOH	64767.8	106463	84577.5	47022.5	60223.8	37687.7	-
E0X9P2	High	Neurogenin 3 [OS=Homo sapiens]	1	NEUROG3	332537	501191	331844	241428	283513	147870	Oxidation [P5; P9]
E4W6B6	High	RPL27/NME2 fusion protein [OS=Homo sapiens]	4	RPL27	357019	314009	313584	259202	177628	139733	-
E5KLM0	High	mitochondrial dynamin-like 120 kDa protein [OS=Homo sapiens]	4	OPA1	24062.6	39835.9	58841.2	17469.9	22534.4	26219.7	-
E5KND7	High	Elongation factor G, mitochondrial [OS=Homo sapiens]	2	GFM1	26719.8	36002	28492.4	19399	20365.6	12696.2	-
E5KSX8	High	Mitochondrial transcription factor A [OS=Homo sapiens]	6	TFAM	161663	196024	129393	117370	110887	57657.5	Oxidation [K131]
E5RGR0	High	Acyl-protein thioesterase 1 [OS=Homo sapiens]	1	LYPLA1	29240.7	-	28562.1	21229.3	-	12727.3	-
E5RI99	High	60S ribosomal protein L30 [OS=Homo sapiens]	3	RPL30	203135	119962	235099	147480	67860.3	104760	-
E7EQG2	High	eukaryotic initiation factor 4A-II [OS=Homo sapiens]	1	EIF4A2	18460.4	-	16564.8	13402.6	-	7381.27	-
E7EQV9	High	ribosomal protein L15 [OS=Homo sapiens]	3	RPL15	530012	438881	669338	384798	248266	298257	-
E7ETK0	High	40S ribosomal protein S24 [OS=Homo sapiens]	2	RPS24	494281	489281	229848	358856	276776	102420	-
E7EU96	High	Casein kinase II subunit alpha [OS=Homo sapiens]	4	CSNK2A1	83208.1	138181	143462	60410.6	78166.2	63926.9	-
E7EUC7	High	UTP--glucose-1-phosphate uridylyltransferase [OS=Homo sapiens]	2	UGP2	88512	68579.5	100940	64261.3	38794	44979	-
E7EX73	High	eukaryotic translation initiation factor 4 gamma 1 [OS=Homo sapiens]	1	EIF4G1	39404.9	15984.6	16658.4	28608.6	9042.15	7422.99	-
E9PAQ1	High	Properdin [OS=Homo sapiens]	1	CFP	12504	27683.7	23200.1	9078.12	15660.1	10338	-
E9PBP8	High	UDP-glucuronosyltransferase 2B7 [OS=Homo sapiens]	7	UGT2B7	210951	233205	270700	153154	131919	120624	-
E9PCT3	High	Caveolin [OS=Homo sapiens]	1	CAV2	57229.6	-	77163.4	41549.7	-	34384	-
E9PCY7	High	Heterogeneous nuclear ribonucleoprotein H [OS=Homo sapiens]	2	HNRNPH1	813631	434521	606139	590711	245800	270096	-
E9PDX4	High	SLIT-ROBO Rho GTPase-activating protein 2 [OS=Homo sapiens]	1	SRGAP2	32002	40236.2	24016.2	23234	22760.8	10701.6	-
E9PF49	Medium	NADH dehydrogenase [ubiquinone] 1 beta subcomplex subunit 9 [OS=Homo sapiens]	1	NDUFB9	20477.2	10140.2	10978.8	14866.8	5736.12	4892.15	-
E9PK52	High	band 4.1-like protein 2 [OS=Homo sapiens]	2	EPB41L2	36150.2	34554.5	53442.3	26245.7	19546.8	23813.9	-
E9PKL7	High	Ras-related protein Rab-2A [OS=Homo sapiens]	4	RAB2A	187120	137728	151041	135853	77909.9	67303.7	-
E9PKZ0	High	60S ribosomal protein L8 [OS=Homo sapiens]	5	RPL8	546772	617222	148567	396966	349150	66201.5	-
E9PMS6	High	LIM domain only protein 7 [OS=Homo sapiens]	3	LMO7	17433.2	99079.6	-	12656.8	56047.3	-	-
E9PP21	High	Cysteine and glycine-rich protein 1 [OS=Homo sapiens]	3	CSRP1	90666.5	70218	23235.6	65825.5	39720.9	10353.8	-
E9PQ80	High	Charged multivesicular body protein 4a [OS=Homo sapiens]	2	CHMP4A	75781.5	60758.1	137592	55018.7	34369.6	61311.2	-
E9PQB7	High	Cofilin-1 [OS=Homo sapiens]	3	CFL1	487120	319311	296005	353658	180628	131900	-
E9PR17	High	CD59 glycoprotein [OS=Homo sapiens]	4	CD59	2.07731e+06	2.78765e+06	3.13256e+06	1.50816e+06	1.57692e+06	1.39587e+06	-
E9PR44	High	Alpha-crystallin B chain [OS=Homo sapiens]	10	-	6.67476e+06	1.73792e+07	2.07732e+06	4.84599e+06	9.83103e+06	925656	Acetyl [N-Term]
E9PRJ8	High	tetraspanin [OS=Homo sapiens]	4	CD81	520996	741414	1.18869e+06	378252	419402	529681	-
F2Z393	High	Transaldolase [OS=Homo sapiens]	1	TALDO1	20580.1	11667.4	26952.8	14941.5	6599.99	12010.2	-
F2Z3K5	High	Dolichyl-diphosphooligosaccharide--protein glycosyltransferase subunit 2 [OS=Homo sapiens]	1	RPN2	24692.2	19680.9	57799	17926.9	11133.1	25755.2	-
F4ZW63	High	NF45 [OS=Homo sapiens]	2	ILF2	18920.9	17601.5	-	13736.9	9956.8	-	-
F5GY37	High	Prohibitin-2 [OS=Homo sapiens]	5	PHB2	504285	299349	714608	366120	169335	318429	-
F5GYQ1	High	V-type proton ATPase subunit [OS=Homo sapiens]	3	ATP6V0D1	122127	77904	105811	88666.2	44068.7	47149.5	-
F5GZS6	High	4F2 cell-surface antigen heavy chain [OS=Homo sapiens]	2	SLC3A2	23289.6	57539.5	32548.1	16908.7	32548.9	14503.4	-
F5H365	High	protein transport protein Sec23A [OS=Homo sapiens]	4	SEC23A	122907	22710.3	84714.2	89232.9	12846.8	37748.7	-
F5H5D3	High	tubulin alpha chain [OS=Homo sapiens]	2	TUBA1C	1.58252e+07	1.5547e+07	1.6295e+07	1.14894e+07	8.79459e+06	7.26104e+06	-
F5H5N1	High	NADH dehydrogenase [ubiquinone] iron-sulfur protein 7, mitochondrial [OS=Homo sapiens]	2	NDUFS7	267023	95179.1	83573.7	193863	53840.8	37240.4	-
F5H608	High	ATP synthase subunit d, mitochondrial [OS=Homo sapiens]	4	ATP5PD	175765	61789.3	90129.6	127609	34952.9	40161.8	-
F6RFD5	High	Destrin [OS=Homo sapiens]	1	DSTN	183451	88232.9	105523	133188	49911.5	47021.1	-
F8VQX6	High	methyltransferase-like protein 7A [OS=Homo sapiens]	4	METTL7A	110181	171355	174722	79993.6	96932	77856	-
F8VR50	High	Actin-related protein 2/3 complex subunit 3 [OS=Homo sapiens]	1	ARPC3	43579.9	36298.8	54142.4	31639.8	20533.5	24125.8	-
F8VUA2	High	Charged multivesicular body protein 1a [OS=Homo sapiens]	4	CHMP1A	710403	300588	343436	515765	170037	153035	Acetyl [N-Term]
F8VUA5	High	Ras-related protein Rab-5B [OS=Homo sapiens]	1	RAB5B	-	14314.3	23702.1	-	8097.32	10561.6	-
F8VV35	High	D-amino-acid oxidase [OS=Homo sapiens]	1	DAO	19261.4	17388.2	24834	13984.1	9836.16	11066	-
F8VVM2	High	Phosphate carrier protein, mitochondrial [OS=Homo sapiens]	8	SLC25A3	1.25511e+06	1.42307e+06	1.34228e+06	911232	805000	598122	-
F8VVW8	High	3'(2'),5'-bisphosphate nucleotidase 1 [OS=Homo sapiens]	1	BPNT1	36743.5	23474.4	34067.7	26676.4	13279	15180.6	-
F8VW96	High	Cysteine and glycine-rich protein 2 [OS=Homo sapiens]	1	CSRP2	29446.8	30616.5	-	21378.9	17319.1	-	-
F8VYN9	High	ADP-ribosylation factor-like protein 1 [OS=Homo sapiens]	3	ARL1	61857.9	81970.2	95737.8	44909.9	46368.9	42660.8	-
F8VZX2	High	Poly(rC)-binding protein 2 [OS=Homo sapiens]	3	PCBP2	119217	327002	106459	86553.6	184978	47438.3	-
F8W0I7	High	Netrin-4 [OS=Homo sapiens]	1	NTN4	18030.8	66193.8	26431.5	13090.7	37444.5	11777.9	-
F8W6I7	High	Heterogeneous nuclear ribonucleoprotein A1 [OS=Homo sapiens]	3	HNRNPA1	92458.3	267807	39858.3	67126.3	151493	17760.9	-
F8W7C6	High	60S ribosomal protein L10 [OS=Homo sapiens]	1	RPL10	21516.6	-	18981.2	15621.4	-	8458.03	-
F8W9U3	High	Protein ABHD14B [OS=Homo sapiens]	5	ABHD14B	308221	407458	222026	223774	230491	98934.8	-
F8WAG2	High	Serine/threonine-protein kinase Nek7 [OS=Homo sapiens]	1	NEK7	7648.17	10915	-	5552.7	6174.41	-	-
F8WB72	High	60S ribosomal protein L35a [OS=Homo sapiens]	1	RPL35A	207950	172108	311967	150975	97358	139013	-
G3V0I5	High	NADH dehydrogenase [ubiquinone] flavoprotein 1, mitochondrial [OS=Homo sapiens]	10	NDUFV1	731919	326818	585965	531386	184874	261106	-
G3V1R6	Medium	fas-activated serine/threonine kinase [OS=Homo sapiens]	1	FASTK	16195	10944	63992	11757.9	6190.78	28514.8	Oxidation [P72]
G3V203	High	60S ribosomal protein L18 [OS=Homo sapiens]	5	RPL18	844745	742272	1.18246e+06	613300	419888	526906	-
G3V2S9	High	SRA stem-loop-interacting RNA-binding protein, mitochondrial [OS=Homo sapiens]	3	SLIRP	406537	524574	151512	295153	296741	67513.7	-
G3V2V6	High	V-type proton ATPase subunit D [OS=Homo sapiens]	1	ATP6V1D	25718.2	-	18933	18671.8	-	8436.56	-
G3V325	High	ATP5J2-PTCD1 readthrough [OS=Homo sapiens]	2	ATP5J2-PTCD1	260754	141253	246140	189312	79903.8	109680	-
G3V3U4	High	Proteasome subunit alpha type [OS=Homo sapiens]	3	PSMA6	87676.5	22770.6	127772	63654.7	12880.9	56935.4	-
G3V4P8	High	glia maturation factor beta [OS=Homo sapiens]	1	GMFB	23336.6	-	16049.1	16942.8	-	7151.49	-
G3V4U0	High	Fibulin-5 [OS=Homo sapiens]	3	FBLN5	98392.5	192282	239396	71434.7	108770	106675	-
G5E9D8	High	inter-alpha (globulin) inhibitor H5, isoform CRA_e [OS=Homo sapiens]	9	ITIH5	64031.9	254534	121132	46488.3	143985	53976.4	-
G5EA09	High	syndecan binding protein (syntenin), isoform CRA_a [OS=Homo sapiens]	3	SDCBP	139867	225886	266319	101546	127779	118672	-
G8JLA2	High	Myosin light polypeptide 6 [OS=Homo sapiens]	1	MYL6	1.05806e+08	7.63203e+07	6.84689e+07	7.68173e+07	4.31728e+07	3.05098e+07	Oxidation [P73; K80]
G8JLH6	High	tetraspanin [OS=Homo sapiens]	2	CD9	165995	107254	191178	120515	60671.2	85188.8	-
G9LKX8	High	Cytochrome c oxidase subunit 2 [OS=Homo sapiens]	2	COX2	814956	420178	545189	591672	237686	242936	-
H0UI49	High	laminin, alpha 4, isoform CRA_b [OS=Homo sapiens]	16	LAMA4	269061	737695	432612	195343	417299	192772	-
H0Y2W2	High	ATPase family AAA domain-containing protein 3A [OS=Homo sapiens]	4	ATAD3A	79278.4	97098.2	117881	57557.5	54926.4	52527.7	-
H0Y337	Medium	Utrophin (Fragment) OS=Homo sapiens GN=UTRN PE=1 SV=1	1	UTRN	163311	56834.2	74236.4	118567	32150	33079.8	-
H0Y4J6	High	Adenylate kinase isoenzyme 1 [OS=Homo sapiens]	1	-	117771	118049	-	85503.8	66778.1	-	-
H0Y8G5	High	heterogeneous nuclear ribonucleoprotein D0 [OS=Homo sapiens]	3	HNRNPD	416814	244869	207741	302614	138517	92569.5	-
H0Y8X6	High	E3 ubiquitin-protein ligase NEDD4 [OS=Homo sapiens]	4	NEDD4	58525.5	155485	43358.5	42490.6	87954.6	19320.6	-
H0Y927	High	Ras-related protein Rab-28 (Fragment) OS=Homo sapiens GN=RAB28 PE=1 SV=1	1	RAB28	31872.4	78866.9	73618.3	23139.9	44613.4	32804.3	Oxidation [K10; P11]
H0Y984	High	ADP-ribosyl cyclase/cyclic ADP-ribose hydrolase 2 [OS=Homo sapiens]	3	BST1	258640	207753	119108	187777	117522	53074.7	Oxidation [K140]
H0YAC6	High	Lipopolysaccharide-responsive and beige-like anchor protein [OS=Homo sapiens]	2	LRBA	56736.5	-	32079.3	41191.7	-	14294.5	-
H0YAF8	High	Receptor of-activated protein C kinase 1 [OS=Homo sapiens]	3	RACK1	70320.7	32779	122254	51054.1	18542.4	54476.6	-
H0YBX6	High	Ubiquitin-conjugating enzyme E2 variant 2 [OS=Homo sapiens]	1	UBE2V2	110018	36252	43448.5	79875.1	20507	19360.7	-
H0YBZ2	High	HLA class II histocompatibility antigen gamma chain [OS=Homo sapiens]	1	CD74	19947.6	19542.5	38556.2	14482.3	11054.8	17180.7	-
H0YC24	High	Anthrax toxin receptor 1 (Fragment) OS=Homo sapiens GN=ANTXR1 PE=1 SV=1	1	ANTXR1	25198.4	66661.8	223217	18294.5	37709.2	99465.4	Oxidation [K13]
H0YCY8	High	Dipeptidyl peptidase 1 (Fragment) OS=Homo sapiens GN=CTSC PE=1 SV=8	1	CTSC	2.15943e+06	878191	1.53922e+06	1.56778e+06	496775	685878	-
H0YDD4	High	Acetyltransferase component of pyruvate dehydrogenase complex [OS=Homo sapiens]	8	DLAT	1.04072e+06	510730	667792	755578	288909	297568	-
H0YET1	High	Liprin-beta-2 [OS=Homo sapiens]	1	PPFIBP2	89069.3	176983	119402	64665.9	100116	53205.4	Oxidation [P129; P130]
H0YGS3	High	Microfibrillar-associated protein 5 [OS=Homo sapiens]	1	MFAP5	23781.9	296333	49630.9	17266.1	167629	22115.6	-
H0YI43	High	Myosin light polypeptide 6 [OS=Homo sapiens]	1	MYL6	46961.6	80281.1	184071	34095	45413.4	82022.3	-
H0YJ10	High	Uncharacterized protein [OS=Homo sapiens]	1	-	16344.7	49790.8	21667	11866.5	28165.7	9654.81	-
H0YJG7	High	activator of 90 kDa heat shock protein ATPase homolog 1 [OS=Homo sapiens]	1	AHSA1	6768.59	41531.8	17419.2	4914.11	23493.7	7761.99	-
H0YJV7	High	Transcriptional repressor protein YY1 [OS=Homo sapiens]	1	YY1	9354.38	36763.9	18088	6791.45	20796.6	8060	-
H0YJW9	High	Uncharacterized protein [OS=Homo sapiens]	1	-	31326.1	32547.1	-	22743.3	18411.2	-	-
H0YJZ4	Medium	Striatin-3 [OS=Homo sapiens]	1	STRN3	-	30739.2	9572.52	-	17388.5	4265.52	-
H0YKD8	High	60S ribosomal protein L28 [OS=Homo sapiens]	2	RPL28	179548	87033.9	78143.7	130355	49233.3	34820.9	-
H0YKK6	High	Proteasome activator complex subunit 1 [OS=Homo sapiens]	2	PSME1	64195.3	25976.1	48109.3	46606.9	14694.2	21437.5	-
H0YKS1	High	Myelin expression factor 2 [OS=Homo sapiens]	1	MYEF2	33387.4	35100.1	-	24239.9	19855.4	-	-
H0YL69	High	Proteasome subunit alpha type [OS=Homo sapiens]	1	PSMA4	18096.5	-	31607.2	13138.3	-	14084.2	-
H0YMG7	High	retinal dehydrogenase 2 [OS=Homo sapiens]	1	ALDH1A2	13891.1	-	35515.9	10085.1	-	15825.9	-
H3BLW9	High	DNA repair protein SWI5 homolog [OS=Homo sapiens]	1	SWI5	44107.4	37947.1	-	32022.8	21465.9	-	-
H3BMM9	High	RNA-binding protein with serine-rich domain 1 [OS=Homo sapiens]	2	RNPS1	102164	923256	164719	74173.1	522267	73398.9	-
H3BMQ2	High	Probable ribosome biogenesis protein RLP24 [OS=Homo sapiens]	1	RSL24D1	8600.86	35719.2	-	6244.37	20205.6	-	-
H3BNK3	High	Acyl carrier protein [OS=Homo sapiens]	1	NDUFAB1	57314.3	33816.7	32546.2	41611.2	19129.4	14502.6	-
H3BNQ7	High	4-aminobutyrate aminotransferase, mitochondrial [OS=Homo sapiens]	5	ABAT	81590.5	87750.7	42602.7	59236.1	49638.7	18983.8	-
H3BNT2	High	Ubiquinone biosynthesis protein COQ9, mitochondrial [OS=Homo sapiens]	2	COQ9	8907.15	55729.7	-	6466.75	31525.1	-	-
H3BNX8	High	Cytochrome c oxidase subunit 5A, mitochondrial [OS=Homo sapiens]	4	COX5A	620569	254534	245486	450544	143985	109388	-
H3BPA2	High	beta,beta-carotene 15,15'-dioxygenase [OS=Homo sapiens]	1	BCO1	10061.7	11537.9	14053.4	7304.94	6526.74	6262.18	Acetyl [N-Term]
H3BPA8	High	Puratrophin-1 (Fragment) OS=Homo sapiens GN=PLEKHG4 PE=1 SV=1	1	-	140613	242673	247351	102087	137275	110219	Oxidation [P5]
H3BQZ7	High	hCG2044799 [OS=Homo sapiens]	6	HNRNPUL2-BSCL2	35432	302651	15650.9	25724.3	171203	6974.04	-
H3BS02	High	[3-methyl-2-oxobutanoate dehydrogenase [lipoamide]] kinase, mitochondrial [OS=Homo sapiens]	2	BCKDK	43638.4	36611.9	52480.3	31682.2	20710.6	23385.2	-
H3BT71	High	RNA-binding motif protein, X chromosome [OS=Homo sapiens]	2	RBMX	6127.91	19556.8	-	4448.97	11062.9	-	-
H3BV16	High	NADH dehydrogenase [ubiquinone] 1 beta subcomplex subunit 10 [OS=Homo sapiens]	2	NDUFB10	156077	100368	110983	113314	56776.1	49454.2	-
H6VRF8	High	keratin 1 [OS=Homo sapiens]	33	KRT1	3.26795e+08	1.59055e+08	2.44192e+08	2.37259e+08	8.99743e+07	1.08812e+08	Oxidation [K211; K455; P499]
H6WCP5	High	EPRSN1 [OS=Homo sapiens]	2	EPRS	64714.4	13851.8	23515.8	46983.8	7835.67	10478.6	-
H7BZW6	High	Histone deacetylase complex subunit SAP18 [OS=Homo sapiens]	2	SAP18	6663.58	23105	14845.7	4837.88	13070	6615.26	-
H7C2W9	High	60S ribosomal protein L31 [OS=Homo sapiens]	2	RPL31	580504	464655	254735	421456	262846	113510	-
H7C463	High	MICOS complex subunit Mic60 [OS=Homo sapiens]	1	IMMT	30098.3	43951.8	60276	21851.9	24862.6	26859	-
H7C4S7	High	Membrane-associated guanylate kinase, WW and PDZ domain-containing protein 1 [OS=Homo sapiens]	1	MAGI1	35502	-	16018	25775	-	7137.64	-
H9KV45	High	Ubiquitin-conjugating enzyme E2 D3 [OS=Homo sapiens]	2	UBE2D3	147189	118902	55957.7	106862	67260.6	24934.8	-
H9NKY4	High	IFITM3 [OS=Homo sapiens]	1	IFITM3	126383	58586.9	178819	91756	33141.4	79682	-
I0B0K8	High	Truncated profilaggrin [OS=Homo sapiens]	1	FLG	127598	64054.2	48551.4	92638.7	36234.1	21634.5	-
I1SRC5	High	UBE2L3/KRAS fusion protein [OS=Homo sapiens]	1	KRAS	84679.7	62974.1	37297.2	61479	35623.2	16619.6	-
I3L0K2	High	Thioredoxin domain-containing protein 17 [OS=Homo sapiens]	1	TXNDC17	12114.8	90600.4	-	8795.58	51250.8	-	-
I3L397	High	eukaryotic translation initiation factor 5A [OS=Homo sapiens]	6	EIF5A	174903	238293	72342.5	126983	134798	32235.8	-
I3L3P7	High	40S ribosomal protein S15a [OS=Homo sapiens]	5	RPS15A	694781	570733	608114	504423	322852	270975	-
I3L526	Medium	Brain-specific angiogenesis inhibitor 1-associated protein 2 [OS=Homo sapiens]	1	BAIAP2	18090.8	19815.8	-	13134.2	11209.4	-	-
J3KND8	High	phenylalanine-4-hydroxylase [OS=Homo sapiens]	2	PAH	41411.6	51655.4	13122.3	30065.5	29220.4	5847.28	-
J3KNQ4	High	alpha-parvin [OS=Homo sapiens]	5	PARVA	122854	160234	221785	89193.8	90640.8	98827.5	-
J3KR23	High	IST1 homolog [OS=Homo sapiens]	1	IST1	39877.4	23429.3	25307.6	28951.7	13253.5	11277.1	-
J3KRX5	High	60S ribosomal protein L17 [OS=Homo sapiens]	5	RPL17	848335	980290	530949	615906	554530	236591	-
J3KS22	High	L-xylulose reductase [OS=Homo sapiens]	7	DCXR	1.60625e+06	620967	567264	1.16617e+06	351268	252773	Acetyl [N-Term]
J3KTJ8	High	60S ribosomal protein L26 [OS=Homo sapiens]	3	-	281163	177638	236946	204129	100486	105583	-
J3KTL2	High	Serine/arginine-rich-splicing factor 1 [OS=Homo sapiens]	8	SRSF1	728392	609020	551134	528826	344510	245585	-
J3QL15	High	ribosomal protein L19 [OS=Homo sapiens]	1	-	66005.7	93360	29752.8	47921.3	52811.8	13257.8	-
J3QRN6	High	Unconventional myosin-Id [OS=Homo sapiens]	25	MYO1D	1.29562e+06	1.04749e+06	1.34364e+06	940643	592542	598728	-
J3QRS3	High	myosin regulatory light chain 12A [OS=Homo sapiens]	1	MYL12A	6.10377e+07	6.30077e+07	4.95228e+07	4.43144e+07	3.56422e+07	2.20674e+07	-
J3QRU1	High	Tyrosine-protein kinase [OS=Homo sapiens]	1	YES1	15027.6	27895.2	-	10910.3	15779.7	-	-
K7EJE1	High	NADH dehydrogenase [ubiquinone] 1 alpha subcomplex subunit 13 [OS=Homo sapiens]	1	NDUFA13	74917.4	-	41515.7	54391.4	-	18499.4	-
K7EJH8	High	Alpha-actinin-4 [OS=Homo sapiens]	1	ACTN4	48953.6	11465.9	-	35541.2	6486.03	-	Oxidation [K101]
K7EJV9	High	60S ribosomal protein L23a [OS=Homo sapiens]	1	RPL23A	151246	126798	16073.6	109807	71727.1	7162.41	-
K7EKP8	High	cytosolic acyl coenzyme A thioester hydrolase [OS=Homo sapiens]	3	ACOT7	84742.2	110425	48043.7	61524.4	62465	21408.3	-
K7ELE1	High	GPI ethanolamine phosphate transferase 1 [OS=Homo sapiens]	1	PIGN	11940.6	23236.3	22773	8669.09	13144.3	10147.6	-
K7EM09	High	Transmembrane protein 205 [OS=Homo sapiens]	1	TMEM205	33015.5	20775.9	35668.6	23969.9	11752.5	15893.9	-
K7ENK9	High	Vesicle-associated membrane protein 2 [OS=Homo sapiens]	1	VAMP2	-	29182.4	22405.9	-	16507.9	9984.08	-
K7EPJ0	High	cysteine protease [OS=Homo sapiens]	1	ATG4D	423999	299066	187023	307831	169175	83337.4	Oxidation [P16]
K7ER11	High	Cytochrome c oxidase subunit 7A1, mitochondrial [OS=Homo sapiens]	1	COX7A1	31495.1	8948.37	15778.6	22866	5061.91	7030.96	-
K7ERP4	High	Glutathione peroxidase [OS=Homo sapiens]	5	GPX4	829208	360794	448879	602020	204094	200021	-
L0R5A1	High	Alternative protein CSF2RB [OS=Homo sapiens]	1	CSF2RB	1.35313e+07	1.21215e+07	9.65988e+06	9.82394e+06	6.85687e+06	4.30445e+06	-
L8EC91	High	Alternative protein EGF OS=Homo sapiens GN=EGF PE=4 SV=1	1	EGF	43165	67439.4	78137.3	31338.5	38149.1	34818	Oxidation [P11; P13; P14; P15]
M0QXS5	High	Heterogeneous nuclear ribonucleoprotein L [OS=Homo sapiens]	5	HNRNPL	145572	284362	52238.8	105688	160858	23277.6	-
M0QYD4	High	putative L-aspartate dehydrogenase [OS=Homo sapiens]	1	ASPDH	26593.4	21344.7	13617.3	19307.3	12074.3	6067.87	-
M0QYS1	High	60S ribosomal protein L13a [OS=Homo sapiens]	2	RPL13A	244030	169752	391315	177170	96025.2	174370	-
M0R080	High	dnaJ homolog subfamily B member 1 [OS=Homo sapiens]	3	DNAJB1	111456	206831	32100	80918.7	117000	14303.8	-
M0R0R2	High	40S ribosomal protein S5 [OS=Homo sapiens]	1	RPS5	137018	82581.8	143102	99477.1	46714.8	63766.4	-
M0R0V1	Medium	Pleckstrin homology domain-containing family A member 4 [OS=Homo sapiens]	1	PLEKHA4	35580.3	20724.1	37791	25831.9	11723.2	16839.7	Oxidation [P17]
M0R122	High	Epithelial membrane protein 3 [OS=Homo sapiens]	1	EMP3	23884.2	22127.6	20212.2	17340.4	12517.1	9006.57	-
M0R1T5	High	charged multivesicular body protein 2a [OS=Homo sapiens]	1	CHMP2A	190256	82721	184550	138129	46793.6	82235.6	-
M0R210	High	40S ribosomal protein S16 [OS=Homo sapiens]	4	RPS16	279789	108249	253921	203132	61234.5	113147	-
M0R299	High	rRNA 2'-O-methyltransferase fibrillarin [OS=Homo sapiens]	4	FBL	28147	144456	16112.7	20435.2	81715.6	7179.84	-
M0R3F1	High	Heterogeneous nuclear ribonucleoprotein U-like protein 1 [OS=Homo sapiens]	5	HNRNPUL1	9639.94	198285	18386.7	6998.77	112166	8193.13	-
O00159-1	High	Unconventional myosin-Ic [OS=Homo sapiens]	6	MYO1C	2.22442e+06	2.74815e+06	4.43944e+06	1.61496e+06	1.55457e+06	1.97822e+06	-
O00187-1	High	Mannan-binding lectin serine protease 2 [OS=Homo sapiens]	1	MASP2	-	36122.9	36927.3	-	20434	16454.8	-
O00217	High	NADH dehydrogenase [ubiquinone] iron-sulfur protein 8, mitochondrial [OS=Homo sapiens]	4	NDUFS8	175624	141566	142425	127506	80081.2	63464.7	-
O00232-1	High	26s proteasome non-atpase regulatory subunit 12 [OS=Homo sapiens]	1	PSMD12	21999.4	-	26340.8	15972	-	11737.5	-
O00267	High	Transcription elongation factor Spt5 [OS=Homo sapiens]	1	SUPT5H	4.41209e+06	5.07609e+06	1.01099e+07	3.20325e+06	2.87144e+06	4.50497e+06	-
O00338	High	Sulfotransferase 1C2 [OS=Homo sapiens]	3	SULT1C2	59390.1	158764	64376.9	43118.2	89809.7	28686.3	-
O00468-6	High	Isoform 6 of Agrin [OS=Homo sapiens]	66	AGRN	3.51738e+07	1.73091e+08	4.80341e+07	2.55368e+07	9.79141e+07	2.1404e+07	Oxidation [P121; P122; P126; K129; P273; P346; P427]
O00483	High	Cytochrome c oxidase subunit NDUFA4 [OS=Homo sapiens]	3	NDUFA4	737053	418478	397814	535114	236724	177266	-
O00571	High	ATP-dependent RNA helicase DDX3X [OS=Homo sapiens]	8	DDX3X	113601	254568	75437.3	82476.2	144004	33614.9	-
O14495	High	Phospholipid phosphatase 3 [OS=Homo sapiens]	3	PPAP2B; PLPP3	37062.8	213286	121633	26908.3	120651	54199.7	-
O14745	High	Na(+)/H(+) exchange regulatory cofactor NHE-RF1 [OS=Homo sapiens]	6	SLC9A3R1	271102	229199	205900	196825	129653	91749.2	-
O14880	High	Microsomal glutathione S-transferase 3 [OS=Homo sapiens]	3	MGST3	569068	589424	983775	413153	333425	438370	-
O14950	High	Myosin regulatory light chain 12B [OS=Homo sapiens]	1	MYL12B; MYL12A	153927	121656	121122	111754	68818.2	53971.9	Oxidation [K93]
O14975	High	very long-chain acyl-CoA synthetase [OS=Homo sapiens]	3	SLC27A2	68304.2	166608	44585	49590	94246.8	19867.1	-
O14992	High	HS24/P52 [OS=Homo sapiens]	1	HSPA4	20334	-	30701.7	14762.8	-	13680.7	-
O15020	High	Spectrin beta chain, non-erythrocytic 2 [OS=Homo sapiens]	7	SPTBN2	41073.2	14744	17303.5	29819.8	8340.39	7710.43	-
O15143	High	Actin-related protein 2/3 complex subunit 1B [OS=Homo sapiens]	1	ARPC1B	13748.4	17646.2	20031	9981.6	9982.08	8925.8	-
O15230	High	Laminin subunit alpha-5 [OS=Homo sapiens]	109	LAMA5	1.68965e+08	1.84996e+08	2.44313e+08	1.22672e+08	1.04648e+08	1.08866e+08	Oxidation [P1686; P1690; K2276; P2928]
O15260-1	High	surfeit locus protein 4 [OS=Homo sapiens]	1	SURF4	35927.8	27204.7	42430	26084.2	15389.1	18906.8	-
O43175	High	D-3-phosphoglycerate dehydrogenase [OS=Homo sapiens]	6	PHGDH	329249	301857	214548	239041	170754	95602.8	-
O43181	High	NADH dehydrogenase [ubiquinone] iron-sulfur protein 4, mitochondrial [OS=Homo sapiens]	1	NDUFS4	147216	52765.9	88575.7	106882	29848.6	39469.4	-
O43272	High	Proline dehydrogenase 1, mitochondrial [OS=Homo sapiens]	3	PRODH	19524.6	16705.2	-	14175.2	9449.78	-	-
O43294-1	High	Transforming growth factor beta-1-induced transcript 1 protein [OS=Homo sapiens]	7	TGFB1I1	291347	247696	168797	211523	140116	75216.1	-
O43301	High	Heat shock 70 kDa protein 12A [OS=Homo sapiens]	5	HSPA12A	98735.9	236434	127000	71684	133746	56591.2	-
O43488	High	aflatoxin B1 aldehyde reductase member 2 [OS=Homo sapiens]	4	AKR7A2	39098.6	63900.8	14181.8	28386.3	36147.4	6319.43	-
O43598-1	High	2'-deoxynucleoside 5'-phosphate N-hydrolase 1 [OS=Homo sapiens]	2	C6orf108; DNPH1	290243	109234	192753	210722	61791.5	85890.8	-
O43615	High	Mitochondrial import inner membrane translocase subunit TIM44 [OS=Homo sapiens]	2	TIMM44	23913.2	67096.8	25675.8	17361.4	37955.3	11441.1	-
O43678	High	NADH dehydrogenase [ubiquinone] 1 alpha subcomplex subunit 2 [OS=Homo sapiens]	2	NDUFA2	112045	33206.8	60493.6	81346.5	18784.4	26955.9	-
O43707	High	Alpha-actinin-4 [OS=Homo sapiens]	30	ACTN4	3.33758e+07	2.11092e+07	2.20636e+07	2.42314e+07	1.1941e+07	9.83155e+06	Oxidation [K300; P885]
O43795-2	High	Isoform 2 of Unconventional myosin-Ib [OS=Homo sapiens]	19	MYO1B	650040	913836	1.06356e+06	471941	516938	473925	-
O43920	High	NADH dehydrogenase [ubiquinone] iron-sulfur protein 5 [OS=Homo sapiens]	4	NDUFS5	584359	94498.5	98220.6	424255	53455.9	43767.1	-
O60264	High	SWI/SNF-related matrix-associated actin-dependent regulator of chromatin subfamily A member 5 [OS=Homo sapiens]	3	SMARCA5	10583.7	61861.1	-	7683.93	34993.5	-	-
O60493-1	High	sorting nexin-3 [OS=Homo sapiens]	3	SNX3	56427.8	705395	48325.1	40967.6	399027	21533.7	-
O60494	High	cubilin [OS=Homo sapiens]	18	CUBN	433142	363141	205246	314469	205421	91457.6	-
O60656-1	High	UDP-glucuronosyltransferase 1-9 [OS=Homo sapiens]	6	UGT1A9	119327	134342	141365	86633.8	75994.4	62992.1	-
O60701	High	UDP-glucose 6-dehydrogenase [OS=Homo sapiens]	4	UGDH	107800	17251.8	20596.7	78265	9759	9177.88	-
O60783	High	28S ribosomal protein S14, mitochondrial [OS=Homo sapiens]	1	MRPS14	17602.2	41751.1	-	12779.5	23617.8	-	-
O60814	High	Histone H2B type 1-K [OS=Homo sapiens]	6	HIST1H2BK	6.32568e+08	8.0445e+08	6.50115e+08	4.59255e+08	4.55061e+08	2.89691e+08	Oxidation [K35; P51; K109]
O60832-1	High	H/ACA ribonucleoprotein complex subunit 4 [OS=Homo sapiens]	3	DKC1	224485	301157	279401	162980	170358	124501	Oxidation [P10; K11]
O60884	High	DnaJ homolog subfamily A member 2 [OS=Homo sapiens]	2	DNAJA2	67735.9	102670	47177.4	49177.5	58078.4	21022.2	-
O75306-1	High	NADH dehydrogenase [ubiquinone] iron-sulfur protein 2, mitochondrial [OS=Homo sapiens]	6	NDUFS2	297910	90298.9	176381	216288	51080.2	78595.6	-
O75309-1	High	Cadherin-16 [OS=Homo sapiens]	4	CDH16	104202	123548	109027	75652.6	69888.3	48582.6	-
O75342	High	Arachidonate 12-lipoxygenase, 12R-type [OS=Homo sapiens]	1	ALOX12B	34474.3	22927.4	38025.7	25029	12969.6	16944.3	-
O75348	High	V-type proton ATPase subunit G 1 [OS=Homo sapiens]	1	ATP6V1G1	79355.7	37450.9	32244.6	57613.6	21185.2	14368.2	-
O75367-1	High	Core histone macro-H2A.1 [OS=Homo sapiens]	15	H2AFY	1.98361e+07	3.33396e+07	2.67728e+07	1.44013e+07	1.88596e+07	1.193e+07	Oxidation [K347]
O75380	High	NADH dehydrogenase [ubiquinone] iron-sulfur protein 6, mitochondrial [OS=Homo sapiens]	1	NDUFS6	80424.1	13646.6	46255.8	58389.3	7719.61	20611.6	-
O75390	High	citrate synthase, mitochondrial [OS=Homo sapiens]	4	CS	54819.1	165154	90316.2	39799.6	93424.2	40244.9	-
O75438	High	NADH dehydrogenase [ubiquinone] 1 beta subcomplex subunit 1 [OS=Homo sapiens]	2	NDUFB1	149627	49056.9	108910	108632	27750.5	48530.3	-
O75489	High	NADH dehydrogenase [ubiquinone] iron-sulfur protein 3, mitochondrial [OS=Homo sapiens]	8	NDUFS3	400706	211279	228851	290920	119516	101976	-
O75531	High	Barrier-to-autointegration factor [OS=Homo sapiens]	3	BANF1	3.70711e+06	4.66047e+06	5.07071e+06	2.69143e+06	2.63633e+06	2.25951e+06	Oxidation [P14; K18]
O75533-1	High	splicing factor 3B subunit 1 [OS=Homo sapiens]	3	SF3B1	39224.9	46002.4	51017	28478	26022.6	22733.2	-
O75552	High	Vitamin D-dependent calcium binding protein calbindin [OS=Homo sapiens]	1	CALB1	38753.4	25017.8	32713.4	28135.6	14152.1	14577.1	-
O75936	High	gamma-butyrobetaine dioxygenase [OS=Homo sapiens]	3	BBOX1	39641.8	385222	37367.7	28780.6	217912	16651	-
O75954	High	tetraspanin-9 [OS=Homo sapiens]	3	TSPAN9	157146	196950	401659	114091	111411	178979	-
O75964	High	ATP synthase subunit g, mitochondrial [OS=Homo sapiens]	1	ATP5L	49301.1	28198.7	40185	35793.4	15951.4	17906.4	-
O76021	High	Ribosomal L1 domain-containing protein 1 [OS=Homo sapiens]	4	RSL1D1	31563.9	117130	88116.6	22915.9	66257.8	39264.8	-
O76031	High	ATP-dependent Clp protease ATP-binding subunit clpX-like, mitochondrial [OS=Homo sapiens]	4	CLPX	73320.3	92394.5	74890.2	53231.8	52265.6	33371.1	-
O94903	High	Pyridoxal phosphate homeostasis protein [OS=Homo sapiens]	3	PROSC; PLPBP	35315.2	166606	84909.8	25639.5	94245.5	37835.8	-
O94905-1	High	Erlin-2 [OS=Homo sapiens]	5	ERLIN2	241615	139993	418375	175417	79190.9	186428	-
O94906-1	High	Pre-mRNA-processing factor 6 [OS=Homo sapiens]	7	PRPF6	31041	132062	24711.3	22536.3	74705	11011.4	-
O94925-1	High	Glutaminase kidney isoform, mitochondrial [OS=Homo sapiens]	11	GLS	769813	1.42821e+06	762023	558898	807910	339558	-
O94973	High	AP-2 complex subunit alpha-2 [OS=Homo sapiens]	4	AP2A2	355141	297881	383293	257839	168505	170795	-
O95154	High	Aflatoxin B1 aldehyde reductase member 3 [OS=Homo sapiens]	5	AKR7A3	189202	191457	266839	137364	108303	118903	-
O95299	High	NADH dehydrogenase [ubiquinone] 1 alpha subcomplex subunit 10, mitochondrial [OS=Homo sapiens]	6	NDUFA10	505339	357824	273399	366885	202414	121827	-
O95428	High	Papilin [OS=Homo sapiens]	9	PAPLN	210852	658130	215758	153082	372291	96141.9	Oxidation [P1033]
O95715	High	C-X-C motif chemokine 14 [OS=Homo sapiens]	2	CXCL14	205887	252553	61306.4	149477	142864	27318.1	-
O95782	High	AP-2 complex subunit alpha-1 [OS=Homo sapiens]	1	AP2A1	20700.7	27924.4	28845.6	15029.1	15796.3	12853.6	-
O95810	High	caveolae-associated protein 2 [OS=Homo sapiens]	6	SDPR; CAVIN2	858119	253069	603401	623009	143156	268875	-
O95816	High	BAG family molecular chaperone regulator 2 [OS=Homo sapiens]	3	BAG2	18352.8	86397.5	-	13324.5	48873.3	-	-
O95831-1	High	Apoptosis-inducing factor 1, mitochondrial [OS=Homo sapiens]	10	AIFM1	365184	371603	331593	265130	210208	147758	-
O95954-1	High	formimidoyltransferase-cyclodeaminase [OS=Homo sapiens]	13	FTCD	434754	1.95128e+06	773360	315639	1.1038e+06	344609	-
O95996-1	High	adenomatous polyposis coli protein 2 [OS=Homo sapiens]	1	APC2	63266.3	52214.9	96790	45932.4	29536.9	43129.6	Oxidation [K756; P757; P759]
O96008	High	Mitochondrial import receptor subunit TOM40 homolog [OS=Homo sapiens]	2	TOMM40	32400	36883	39510.9	23523	20864	17606.1	-
O96009	High	Napsin-A [OS=Homo sapiens]	2	NAPSA	82952.1	58437.1	10241.9	60224.7	33056.7	4563.79	-
P00167-1	High	Cytochrome b5 [OS=Homo sapiens]	1	CYB5A	47424.9	108398	61735.7	34431.3	61318.8	27509.4	-
P00338-1	High	L-lactate dehydrogenase A chain [OS=Homo sapiens]	2	LDHA	118894	45044.8	127029	86319	25480.9	56604.3	-
P00367	High	Glutamate dehydrogenase 1, mitochondrial [OS=Homo sapiens]	15	GLUD1	1.00348e+06	678551	1.13177e+06	728543	383842	504317	-
P00390	High	Glutathione reductase, mitochondrial [OS=Homo sapiens]	2	GSR	34058.9	-	23556.5	24727.3	-	10496.8	-
P00558	High	phosphoglycerate kinase 1 [OS=Homo sapiens]	7	PGK1	385000	191139	426123	279517	108124	189881	-
P00740	High	Coagulation factor IX [OS=Homo sapiens]	3	F9	116242	182996	27555.7	84393.6	103517	12278.8	-
P00918	High	Carbonic anhydrase 2 [OS=Homo sapiens]	6	CA2	251530	566919	170601	182615	320694	76019.6	-
P00966	High	Argininosuccinate synthase [OS=Homo sapiens]	14	ASS1	3.73187e+06	1.35064e+06	2.63513e+06	2.7094e+06	764027	1.17421e+06	-
P01008	High	Antithrombin-III [OS=Homo sapiens]	9	SERPINC1	545057	792262	319096	395721	448166	142189	-
P01009-1	High	alpha-1-antitrypsin [OS=Homo sapiens]	1	SERPINA1	734813	1.35173e+06	710141	533487	764644	316439	Oxidation [K267]
P01011-1	High	Alpha-1-antichymotrypsin [OS=Homo sapiens]	5	SERPINA3	207818	267972	94162.7	150880	151586	41958.9	-
P01023	High	alpha-2-macroglobulin [OS=Homo sapiens]	9	A2M	156727	93318.6	368101	113787	52788.4	164026	-
P01024	High	Complement C3 [OS=Homo sapiens]	55	C3	1.79908e+07	1.30957e+07	1.32584e+07	1.30616e+07	7.40794e+06	5.90795e+06	-
P01031	High	Complement C5 [OS=Homo sapiens]	49	C5	8.75275e+06	9.65504e+06	3.74854e+06	6.35465e+06	5.46166e+06	1.67035e+06	-
P01034	High	Cystatin-C [OS=Homo sapiens]	1	CST3	57090.1	56303.9	70377.2	41448.4	31849.9	31360.1	-
P01624	High	Immunoglobulin kappa variable 3-15 [OS=Homo sapiens]	1	IGKV3-15	76729.3	181850	88459.6	55706.8	102869	39417.6	-
P01833	High	Polymeric immunoglobulin receptor [OS=Homo sapiens]	15	PIGR	108056	261593	131786	78450.3	147978	58723.9	-
P01861	High	Immunoglobulin heavy constant gamma 4 [OS=Homo sapiens]	2	IGHG4	64677	76779.3	37836.8	46956.6	43432.5	16860.1	-
P02452	High	Collagen alpha-1(I) chain [OS=Homo sapiens]	26	COL1A1	9.3967e+07	1.42622e+07	3.50856e+07	6.82217e+07	8.06785e+06	1.56342e+07	Oxidation [P183; P186; P190; P192; P193; P196; P198; P204; P205; P208; P211; P216; P219; P238; P241; K277; P282; P285; K286; P289; P292; P298; P303; P313; P316; P318; P333; P334; P336; P339; P342; P343; P346; K352; P357; P360; P373; P375; P376; P378; P384; P388; P394; K397; P403; P409; P412; P423; P426; P427; P429; K430; P436; P439; K442; K448; P451; P453; P459; P460; P462; K468; P475; P477; P481…
P02461	High	Collagen alpha-1(III) chain [OS=Homo sapiens]	53	COL3A1	6.5011e+07	1.26165e+07	2.47229e+07	4.71992e+07	7.1369e+06	1.10165e+07	Oxidation [P281; K284; P290; P296; P298; P311; P314; P332; P334; P335; P337; P338; P344; P347; K350; P359; P365; P371; P383; P385; P386; P392; K395; P400; P404; P407; P416; P418; P425; P455; P458; K461; K466; P470; P473; P479; P500; K503; P505; P524; P530; P533; P539; P542; P545; P551; P553; P566; P568; P571; P575; P581; P583; K584; P599; P602; P604; P607; P608; K610; P620; P622; P637; P644; P649…
P02462	High	Collagen alpha-1(IV) chain [OS=Homo sapiens]	14	COL4A1	1.10858e+08	7.39094e+07	1.82224e+08	8.04852e+07	4.1809e+07	8.11989e+07	Oxidation [P349; P352; P399; P404; P406; P587; P588; P594; P643; P645; P647; P648; P654; P657; P660; P662; P784; P786; P787; P790; P796; P799; P803; P804; P971; P974; P977; P1422; P1424; P1425; P1427; P1431; P1436; P1437; P1440; P1501; P1526; P1528; P1530; P1535; P1543; K1643]
P02489	High	Alpha-crystallin A chain [OS=Homo sapiens]	3	CRYAA; LOC102724652; CRYAA2	158955	893533	149189	115404	505453	66478.6	Acetyl [N-Term]
P02533	High	Keratin, type I cytoskeletal 14 [OS=Homo sapiens]	8	KRT14	1.14668e+07	5.3102e+06	7.60702e+06	8.32512e+06	3.00387e+06	3.38969e+06	Oxidation [K352]
P02538	High	Keratin, type II cytoskeletal 6A [OS=Homo sapiens]	1	KRT6A	108369	80845.1	78014.6	78677.6	45732.4	34763.3	-
P02545	High	Prelamin-A/C [OS=Homo sapiens]	39	LMNA	8.7878e+06	4.46688e+07	1.62016e+07	6.38009e+06	2.52682e+07	7.21942e+06	Oxidation [K201]
P02647	High	Apolipoprotein A-I [OS=Homo sapiens]	12	APOA1	2.06713e+06	1.65242e+06	1.23865e+06	1.50078e+06	934741	551944	-
P02649	High	Apolipoprotein E [OS=Homo sapiens]	19	APOE	8.5996e+06	6.43564e+06	3.81147e+06	6.24346e+06	3.64051e+06	1.69839e+06	-
P02656	High	Apolipoprotein C-III [OS=Homo sapiens]	2	APOC3	276997	112078	105572	201105	63400.2	47042.7	-
P02671-1	High	Fibrinogen alpha chain [OS=Homo sapiens]	13	FGA	571095	1.29741e+06	1.11639e+06	414625	733918	497463	-
P02675	High	Fibrinogen beta chain [OS=Homo sapiens]	21	FGB	1.16234e+06	3.28364e+06	2.03219e+06	843878	1.85749e+06	905543	Oxidation [P337]
P02743	High	Serum amyloid P-component [OS=Homo sapiens]	8	APCS	6.86554e+06	5.24157e+06	3.74186e+06	4.9845e+06	2.96505e+06	1.66738e+06	-
P02760	High	Protein AMBP [OS=Homo sapiens]	9	AMBP	4.65159e+06	7.07921e+06	3.60529e+06	3.37714e+06	4.00456e+06	1.60652e+06	-
P02766	High	Transthyretin [OS=Homo sapiens]	4	TTR	689525	465085	325938	500607	263089	145238	-
P02768-1	High	Serum albumin [OS=Homo sapiens]	39	ALB	2.76081e+07	2.56682e+07	2.48416e+07	2.0044e+07	1.452e+07	1.10694e+07	-
P02790	High	Hemopexin [OS=Homo sapiens]	9	HPX	354795	221990	278685	257587	125575	124182	-
P02792	High	Ferritin light chain [OS=Homo sapiens]	4	FTL	112393	332779	29191.1	81599.2	188246	13007.6	-
P03950	High	angiogenin [OS=Homo sapiens]	1	ANG	55867.6	24015.9	24417.9	40560.8	13585.3	10880.6	-
P04003	High	C4b-binding protein alpha chain [OS=Homo sapiens]	6	C4BPA	90755.9	468735	255916	65890.4	265154	114036	-
P04004	High	Vitronectin [OS=Homo sapiens]	11	VTN	1.95814e+07	2.56915e+07	9.45611e+06	1.42164e+07	1.45331e+07	4.21365e+06	Oxidation [P343; P473]
P04040	High	catalase [OS=Homo sapiens]	7	CAT	273007	209921	200995	198208	118748	89563.2	-
P04075	High	fructose-bisphosphate aldolase A [OS=Homo sapiens]	2	ALDOA	98106.2	43511.6	117515	71226.8	24613.6	52364.5	-
P04080	High	Cystatin-B [OS=Homo sapiens]	1	CSTB	8516.93	43332.8	-	6183.44	24512.5	-	-
P04083	High	annexin A1 [OS=Homo sapiens]	9	ANXA1	165788	846275	278799	120365	478721	124233	-
P04181-1	High	Ornithine aminotransferase, mitochondrial [OS=Homo sapiens]	3	OAT	14227	22153.2	-	10329.1	12531.6	-	-
P04259	High	keratin, type II cytoskeletal 6B [OS=Homo sapiens]	2	KRT6B	6.77487e+06	6.22406e+06	8.29204e+06	4.91867e+06	3.52082e+06	3.69494e+06	-
P04275	High	Von Willebrand factor [OS=Homo sapiens]	11	VWF	-	10256.6	21297	-	5801.97	9489.94	-
P04350	High	Tubulin beta-4A chain [OS=Homo sapiens]	1	TUBB4A	847748	699141	526440	615480	395490	234582	Oxidation [K103; K297]
P04406-1	High	glyceraldehyde-3-phosphate dehydrogenase [OS=Homo sapiens]	11	GAPDH	2.31356e+06	1.06935e+06	2.25956e+06	1.67969e+06	604907	1.00686e+06	Oxidation [K107; P129; K139]
P04632	High	Calpain small subunit 1 [OS=Homo sapiens]	2	CAPNS1	37477.7	30985.1	33372.8	27209.5	17527.6	14870.9	-
P04792	High	Heat shock protein beta-1 [OS=Homo sapiens]	12	HSPB1	2.08324e+06	2.3557e+07	2.08567e+06	1.51247e+06	1.33257e+07	929374	Oxidation [P168; K171]
P04899-1	High	guanine nucleotide-binding protein G(i) subunit alpha-2 [OS=Homo sapiens]	10	GNAI2	2.0824e+06	3.30117e+06	3.23813e+06	1.51186e+06	1.8674e+06	1.44291e+06	-
P05023	High	Sodium/potassium-transporting ATPase subunit alpha-1 [OS=Homo sapiens]	14	ATP1A1	1.60661e+06	1.52641e+06	1.61661e+06	1.16643e+06	863460	720361	-
P05026	High	Sodium/potassium-transporting ATPase subunit beta-1 [OS=Homo sapiens]	5	ATP1B1	318185	289040	315878	231008	163504	140755	-
P05062	High	fructose-bisphosphate aldolase B [OS=Homo sapiens]	8	ALDOB	2.80717e+06	1.00757e+06	1.73575e+06	2.03805e+06	569961	773449	-
P05089	High	Arginase-1 [OS=Homo sapiens]	3	ARG1	160323	78859.1	134050	116398	44609	59732.7	-
P05109	High	Protein S100-A8 [OS=Homo sapiens]	4	S100A8	811239	421311	561951	588974	238327	250405	-
P05141	High	ADP/ATP translocase 2 [OS=Homo sapiens]	5	SLC25A5	5.30214e+06	4.59806e+06	4.03906e+06	3.84944e+06	2.60103e+06	1.79981e+06	-
P05164	High	Myeloperoxidase [OS=Homo sapiens]	26	MPO	1.19828e+06	1.41397e+06	1.01099e+06	869974	799853	450496	-
P05165-1	High	Propionyl-CoA carboxylase alpha chain, mitochondrial [OS=Homo sapiens]	13	PCCA	578713	388763	295281	420156	219915	131577	-
P05387	High	60S acidic ribosomal protein P2 [OS=Homo sapiens]	2	RPLP2	59074.5	81662	47791.1	42889.1	46194.5	21295.7	-
P05388	High	60S acidic ribosomal protein P0 [OS=Homo sapiens]	5	RPLP0	246730	198227	397411	179130	112133	177086	-
P05556-1	High	Integrin beta-1 [OS=Homo sapiens]	8	ITGB1	640992	723943	1.09602e+06	465372	409519	488387	-
P05783	High	Keratin, type I cytoskeletal 18 [OS=Homo sapiens]	17	KRT18	2.46601e+06	854824	1.77133e+06	1.79037e+06	483556	789306	Oxidation [K214]
P05787	High	Keratin, type II cytoskeletal 8 [OS=Homo sapiens]	24	KRT8	1.25162e+07	4.10045e+06	7.25037e+06	9.08699e+06	2.31954e+06	3.23077e+06	Oxidation [K207]
P05997	High	Collagen alpha-2(V) chain [OS=Homo sapiens]	17	COL5A2	1.12621e+06	283587	557875	817650	160419	248589	Oxidation [P212; P238; P239; P242; P245; P260; P263; P269; P275; P284; P353; P409; P410; P412; P416; P419; P428; K431; P437; P442; P443; P448; P449; P452; P509; P514; P515; P517; P578; P593; P599; P601; P602; P658; P659; P904; P905; P911; P919; P920; P922; P926; P931; P935; K937; P962; P965; K968; P971; P977; P979; P982; P1075; P1079; P1085; P1088; P1090; P1156; P1157; P1159; P1169; P1198; P1199]
P06576	High	ATP synthase subunit beta, mitochondrial [OS=Homo sapiens]	21	ATP5B	5.70283e+06	3.4592e+06	5.1036e+06	4.14035e+06	1.9568e+06	2.27416e+06	Oxidation [P171]
P06702	High	Protein S100-A9 [OS=Homo sapiens]	4	S100A9	954403	542175	682295	692914	306697	304031	-
P06727	High	Apolipoprotein A-IV [OS=Homo sapiens]	15	APOA4	1.73602e+06	2.31186e+06	1.62889e+06	1.26038e+06	1.30777e+06	725834	-
P06733-1	High	alpha-enolase [OS=Homo sapiens]	10	ENO1	873281	202455	552850	634017	114525	246350	-
P06756	High	Integrin alpha-V [OS=Homo sapiens]	4	ITGAV	75763.5	55718.6	43538.8	55005.6	31518.8	19400.9	-
P07195	High	L-lactate dehydrogenase B chain [OS=Homo sapiens]	6	LDHB	638600	164529	527513	463635	93070.7	235060	-
P07305	High	Histone H1.0 [OS=Homo sapiens]	4	H1F0	3.22343e+06	1.08928e+07	1.77195e+06	2.34026e+06	6.16185e+06	789580	-
P07355	High	Annexin A2 [OS=Homo sapiens]	13	ANXA2	1.49605e+06	1.64042e+06	1.19494e+06	1.08616e+06	927955	532464	-
P07357	High	Complement component C8 alpha chain [OS=Homo sapiens]	8	C8A	370260	219692	172131	268815	124275	76701.7	Oxidation [P463]
P07360	High	Complement component C8 gamma chain [OS=Homo sapiens]	9	C8G	6.48297e+06	5.62329e+06	1.83689e+06	4.70675e+06	3.18098e+06	818518	-
P07437	High	tubulin beta chain [OS=Homo sapiens]	4	TUBB	2.63724e+06	2.59739e+06	2.86393e+06	1.91468e+06	1.46929e+06	1.27617e+06	Oxidation [K103]
P07585	High	decorin [OS=Homo sapiens]	11	DCN	2.56065e+06	3.36527e+06	3.15948e+06	1.85908e+06	1.90367e+06	1.40787e+06	-
P07737	High	profilin-1 [OS=Homo sapiens]	6	PFN1	1.43149e+06	728270	514754	1.03929e+06	411968	229374	-
P07741-1	High	Adenine phosphoribosyltransferase [OS=Homo sapiens]	1	APRT	48550.2	44245.4	44137.6	35248.3	25028.7	19667.7	-
P07900	High	Heat shock protein HSP 90-alpha [OS=Homo sapiens]	6	HSP90AA1	604626	605370	510128	438969	342445	227313	-
P07911	High	uromodulin [OS=Homo sapiens]	19	UMOD	8.29776e+06	8.84188e+06	3.36604e+06	6.02432e+06	5.00167e+06	1.49991e+06	Oxidation [K432; P441; K577]
P07942	High	Laminin subunit beta-1 [OS=Homo sapiens]	50	LAMB1	9.15447e+06	2.04538e+07	8.54425e+06	6.64631e+06	1.15703e+07	3.80732e+06	Oxidation [P175; P181; K183; K184]
P07954	High	fumarate hydratase, mitochondrial [OS=Homo sapiens]	3	FH	101967	76369.4	124046	74029.8	43200.6	55274.8	-
P08133-1	High	annexin A6 [OS=Homo sapiens]	17	ANXA6	501886	727004	712486	364378	411251	317484	-
P08237	High	ATP-dependent 6-phosphofructokinase, muscle type [OS=Homo sapiens]	2	PFKM	25564.9	-	23114.1	18560.6	-	10299.6	-
P08238	High	Heat shock protein HSP 90-beta [OS=Homo sapiens]	7	HSP90AB1	1.54367e+06	1.83055e+06	1.61837e+06	1.12073e+06	1.0355e+06	721145	-
P08263	High	Glutathione S-transferase A1 [OS=Homo sapiens]	2	GSTA1	331080	385849	177058	240370	218267	78897	Oxidation [K64]
P08311	High	Cathepsin G [OS=Homo sapiens]	7	CTSG	568410	1.80673e+06	639363	412676	1.02203e+06	284900	-
P08473	High	Neprilysin [OS=Homo sapiens]	28	MME	8.7324e+06	1.22529e+07	8.84544e+06	6.33987e+06	6.93123e+06	3.94153e+06	Oxidation [K275]
P08493-1	High	matrix Gla protein [OS=Homo sapiens]	2	MGP	212191	340056	245595	154054	192363	109437	-
P08559	High	Pyruvate dehydrogenase E1 component subunit alpha, somatic form, mitochondrial [OS=Homo sapiens]	4	PDHA1	245154	130642	132454	177986	73901.7	59021.4	-
P08572	High	Collagen alpha-2(IV) chain [OS=Homo sapiens]	40	COL4A2	1.9816e+08	1.36087e+08	3.10928e+08	1.43868e+08	7.69819e+07	1.3855e+08	Oxidation [P63; P65; P68; P74; P75; P81; P114; P120; P123; P128; P365; P368; P374; P380; P383; P386; P388; P389; P462; P465; P468; P586; P589; P591; P592; K597; P635; P641; P643; P644; P649; P650; P652; P656; P707; P716; P718; P722; P731; P733; P734; P739; P773; P781; P783; P901; P904; K907; P925; P934; K937; P973; P975; P976; P978; P984; K987; P1172; K1175; P1181; P1184; P1187; P1190; P1208; P12…
P08582-1	High	Melanotransferrin [OS=Homo sapiens]	9	MFI2; MELTF	107781	66951.8	562622	78250.6	37873.2	250705	-
P08590	High	myosin light chain 3 [OS=Homo sapiens]	1	MYL3	28416.8	23412.1	26217.4	20631.1	13243.8	11682.5	-
P08670	High	Vimentin [OS=Homo sapiens]	33	VIM	5.22589e+07	5.73525e+07	4.81272e+07	3.79409e+07	3.24431e+07	2.14455e+07	Oxidation [K373]
P08697-1	High	Alpha-2-antiplasmin [OS=Homo sapiens]	3	SERPINF2	88340.8	242014	75414.6	64137	136902	33604.8	-
P08727	High	Keratin, type I cytoskeletal 19 [OS=Homo sapiens]	11	KRT19	2.28696e+06	1.68447e+06	1.54471e+06	1.66038e+06	952867	688323	-
P08729	High	Keratin, type II cytoskeletal 7 [OS=Homo sapiens]	7	KRT7	551222	134920	387392	400197	76321.6	172622	-
P08754	High	Guanine nucleotide-binding protein G(k) subunit alpha [OS=Homo sapiens]	2	GNAI3	24478.2	30349.2	22336.3	17771.6	17167.9	9953.08	-
P08758	High	annexin A5 [OS=Homo sapiens]	4	ANXA5	88589.1	180508	132858	64317.3	102110	59201.4	-
P08779	High	Keratin, type I cytoskeletal 16 [OS=Homo sapiens]	16	KRT16	1.73466e+07	9.94618e+06	1.45866e+07	1.25939e+07	5.62635e+06	6.49979e+06	Oxidation [K354]
P09211	High	Glutathione S-transferase P [OS=Homo sapiens]	4	GSTP1	214894	133894	214134	156017	75741.3	95418.2	-
P09382	High	Galectin-1 [OS=Homo sapiens]	8	LGALS1	7.74393e+06	6.29903e+06	3.15246e+06	5.62223e+06	3.56323e+06	1.40474e+06	-
P09417	High	dihydropteridine reductase [OS=Homo sapiens]	1	QDPR	30125	23139	20469.1	21871.3	13089.3	9121.03	-
P09493-9	High	Isoform 9 of Tropomyosin alpha-1 chain [OS=Homo sapiens]	1	TPM1	113964	59093.4	37796.6	82740.1	33427.9	16842.2	-
P09496-2	High	Isoform Non-brain of Clathrin light chain A [OS=Homo sapiens]	3	CLTA	398574	163212	380295	289372	92325.8	169459	-
P09525	High	annexin A4 [OS=Homo sapiens]	4	ANXA4	97962.8	155927	79584.1	71122.7	88204.6	35462.7	-
P09543-1	High	2',3'-cyclic-nucleotide 3'-phosphodiesterase [OS=Homo sapiens]	7	CNP	322307	288017	534509	234001	162925	238177	-
P09669	High	Cytochrome c oxidase subunit 6C [OS=Homo sapiens]	2	COX6C	241775	107688	95008.2	175533	60916.8	42335.7	-
P09936	High	Ubiquitin carboxyl-terminal hydrolase isozyme L1 [OS=Homo sapiens]	1	UCHL1	26992	20687.8	22894.2	19596.7	11702.7	10201.7	-
P0C0L4-1	High	Complement C4-A [OS=Homo sapiens]	3	C4A; C4B	2.84495e+06	6.02762e+06	7.3119e+06	2.06549e+06	3.4097e+06	3.25818e+06	-
P0DJI8	High	Serum amyloid A-1 protein [OS=Homo sapiens]	3	SAA1	274338	237627	77810.2	199174	134420	34672.2	-
P0DJI9	High	Serum amyloid A-2 protein [OS=Homo sapiens]	1	SAA2	10133.3	8310.41	-	7356.99	4701.03	-	-
P0DOX2	High	Immunoglobulin alpha-2 heavy chain [OS=Homo sapiens]	1	-	34813.5	67396.2	72611.2	25275.2	38124.6	32355.6	-
P0DOX6	High	immunoglobulin mu heavy chain [OS=Homo sapiens]	2	-	70249.2	137861	186305	51002.2	77985.2	83017.6	-
P10301	High	Ras-related protein R-Ras [OS=Homo sapiens]	3	RRAS	281697	564298	935421	204517	319212	416824	-
P10599-1	High	thioredoxin [OS=Homo sapiens]	4	TXN	1.8239e+06	1.05039e+06	739984	1.32418e+06	594182	329737	-
P10643	High	Complement component C7 [OS=Homo sapiens]	2	C7	806015	553967	394679	585181	313368	175869	-
P10809	High	60 kDa heat shock protein, mitochondrial [OS=Homo sapiens]	22	HSPD1	3.05224e+06	3.60593e+06	2.55149e+06	2.21598e+06	2.0398e+06	1.13694e+06	-
P10909-1	High	Clusterin [OS=Homo sapiens]	16	CLU	1.31487e+07	3.21738e+07	9.30036e+06	9.54618e+06	1.82e+07	4.14424e+06	-
P11021	High	78 kDa glucose-regulated protein [OS=Homo sapiens]	14	HSPA5	728631	1.22287e+06	721395	528999	691755	321454	-
P11047	High	Laminin subunit gamma-1 [OS=Homo sapiens]	76	LAMC1	1.39256e+08	1.93388e+08	1.9438e+08	1.01102e+08	1.09396e+08	8.66157e+07	Oxidation [K1466; K1478]
P11177	High	Pyruvate dehydrogenase E1 component subunit beta, mitochondrial [OS=Homo sapiens]	3	PDHB	159935	62036.3	106697	116116	35092.7	47544.3	-
P11182	High	Lipoamide acyltransferase component of branched-chain alpha-keto acid dehydrogenase complex, mitochondrial [OS=Homo sapiens]	7	DBT	220757	214222	217093	160273	121181	96736.7	-
P11498	High	pyruvate carboxylase, mitochondrial [OS=Homo sapiens]	29	PC	2.08385e+06	1.67828e+06	1.0568e+06	1.51291e+06	949369	470912	-
P11586	High	C-1-tetrahydrofolate synthase, cytoplasmic [OS=Homo sapiens]	7	MTHFD1	116146	252433	152890	84324	142796	68127.9	-
P12110-2	High	Isoform 2C2A of Collagen alpha-2(VI) chain [OS=Homo sapiens]	16	COL6A2	2.91661e+07	1.88629e+07	2.83384e+07	2.11751e+07	1.06704e+07	1.26276e+07	Oxidation [P288; P293; P297; P299; K300; P357; P363; P483; P575; P577; P581; P583; P584; P587; K766]
P12111	High	Collagen alpha-3(VI) chain [OS=Homo sapiens]	18	COL6A3	1.25673e+08	1.07714e+08	1.43575e+08	9.12409e+07	6.09314e+07	6.3977e+07	Oxidation [K516; P612; P1908; K1913; P2064; P2157; P2169; K2170; P2178; P2182; P2232; P2235; P2238; P2239; P2349]
P12235	High	ADP/ATP translocase 1 [OS=Homo sapiens]	3	SLC25A4	283633	236198	326626	205923	133612	145545	-
P12236	High	ADP/ATP translocase 3 [OS=Homo sapiens]	1	SLC25A6	705809	526882	666597	512430	298046	297036	-
P12273	High	Prolactin-inducible protein [OS=Homo sapiens]	6	PIP	478427	405919	529460	347346	229620	235928	-
P12724	High	eosinophil cationic protein [OS=Homo sapiens]	3	RNASE3	20922.7	112563	17738	15190.3	63674.6	7904.07	-
P12814-1	High	Alpha-actinin-1 [OS=Homo sapiens]	17	ACTN1	872677	705872	1.02332e+06	633579	399297	455993	-
P12955	High	xaa-Pro dipeptidase [OS=Homo sapiens]	1	PEPD	35672.5	33090.5	28239	25898.9	18718.6	12583.3	-
P12956	High	X-ray repair cross-complementing protein 6 [OS=Homo sapiens]	14	XRCC6	1.54452e+06	981832	589972	1.12135e+06	555402	262892	-
P13010	High	X-ray repair cross-complementing protein 5 [OS=Homo sapiens]	8	XRCC5	796292	441548	310358	578122	249775	138296	-
P13073	High	Cytochrome c oxidase subunit 4 isoform 1, mitochondrial [OS=Homo sapiens]	3	COX4I1	211964	66542.2	104211	153890	37641.6	46436.4	-
P13489	High	Ribonuclease inhibitor [OS=Homo sapiens]	5	RNH1	212458	199080	194823	154248	112616	86813	-
P13611-2	High	Isoform V1 of Versican core protein [OS=Homo sapiens]	12	VCAN	121854	182154	29259.5	88468.1	103041	13038	-
P13639	High	Elongation factor 2 [OS=Homo sapiens]	13	EEF2	1.07978e+06	642423	755448	783940	363406	336628	-
P13645	High	Keratin, type I cytoskeletal 10 [OS=Homo sapiens]	30	KRT10	2.56748e+08	1.35448e+08	1.83724e+08	1.86404e+08	7.66203e+07	8.18672e+07	-
P13647	High	keratin, type II cytoskeletal 5 [OS=Homo sapiens]	20	KRT5	2.8052e+07	1.41711e+07	1.82182e+07	2.03663e+07	8.01633e+06	8.11805e+06	Oxidation [K277; K304]
P13727	High	Bone marrow proteoglycan [OS=Homo sapiens]	3	PRG2	44159.8	219042	362498	32060.8	123908	161529	-
P13804-1	High	Electron transfer flavoprotein subunit alpha, mitochondrial [OS=Homo sapiens]	9	ETFA	540962	709307	520220	392748	401240	231810	-
P14174	High	Macrophage Migration inhibitory factor [OS=Homo sapiens]	2	MIF	1.29756e+06	409554	526209	942054	231676	234479	-
P14384	High	Carboxypeptidase M [OS=Homo sapiens]	2	CPM	35551.5	70356.1	66923.5	25811	39799	29821.1	-
P14406	High	Cytochrome c oxidase subunit 7A2, mitochondrial [OS=Homo sapiens]	2	COX7A2	305116	141552	154201	221519	80073.1	68711.9	-
P14543-1	High	Nidogen-1 [OS=Homo sapiens]	25	NID1	1.04974e+08	2.00493e+08	1.59108e+08	7.6213e+07	1.13415e+08	7.08984e+07	Oxidation [P450; P731]
P14550	High	alcohol dehydrogenase [NADP(+)] [OS=Homo sapiens]	8	AKR1A1	315656	700775	376613	229172	396414	167819	-
P14555	High	Phospholipase A2, membrane associated [OS=Homo sapiens]	4	PLA2G2A	18514.1	19270.9	25467.7	13441.5	10901.1	11348.4	-
P14618	High	Pyruvate kinase PKM [OS=Homo sapiens]	19	PKM	3.3988e+06	2.02628e+06	3.2851e+06	2.46759e+06	1.14623e+06	1.46384e+06	-
P14625	High	Endoplasmin [OS=Homo sapiens]	11	HSP90B1	423625	696903	503774	307559	394224	224482	-
P14649	High	Myosin light chain 6B [OS=Homo sapiens]	2	MYL6B	96335	51781.2	58539.9	69940.9	29291.6	26085.4	-
P14854	High	Cytochrome c oxidase subunit 6B1 [OS=Homo sapiens]	1	COX6B1	63105.1	40854.5	18837.6	45815.4	23110.6	8394.02	-
P14923	High	Junction plakoglobin [OS=Homo sapiens]	20	JUP	2.68579e+06	1.944e+06	2.12985e+06	1.94993e+06	1.09968e+06	949062	-
P15088	High	Mast cell carboxypeptidase A [OS=Homo sapiens]	3	CPA3	32809.3	174577	-	23820.1	98754.5	-	-
P15924-1	High	Desmoplakin [OS=Homo sapiens]	66	DSP	9.7523e+06	3.55272e+06	6.19065e+06	7.08034e+06	2.0097e+06	2.75855e+06	Oxidation [K785]
P16152	High	Carbonyl reductase [NADPH] 1 [OS=Homo sapiens]	11	CBR1; SETD4	1.25026e+06	592443	512447	907708	335133	228347	-
P16219	High	Short-chain specific acyl-CoA dehydrogenase, mitochondrial [OS=Homo sapiens]	3	ACADS	21266.4	28571.5	-	15439.8	16162.3	-	Oxidation [P216]
P16401	High	Histone H1.5 [OS=Homo sapiens]	5	HIST1H1B	33640	1.39584e+06	67033.1	24423.3	789598	29870	-
P16615	High	Sarcoplasmic/endoplasmic reticulum calcium ATPase 2 [OS=Homo sapiens]	2	ATP2A2	45622.3	51568	71386.6	33122.6	29170.9	31809.9	-
P17568	High	NADH dehydrogenase [ubiquinone] 1 beta subcomplex subunit 7 [OS=Homo sapiens]	1	NDUFB7	38062.4	22899.7	29729.9	27634	12953.9	13247.6	-
P17858-1	High	ATP-dependent 6-phosphofructokinase, liver type [OS=Homo sapiens]	7	PFKL	461531	286128	421271	335080	161857	187718	-
P17948-1	High	Vascular endothelial growth factor receptor 1 [OS=Homo sapiens]	8	FLT1	293632	428416	628644	213182	242346	280124	-
P17980	High	26S proteasome regulatory subunit 6A [OS=Homo sapiens]	2	PSMC3	29333.4	23351	29337.4	21296.6	13209.2	13072.8	-
P17987	High	T-complex protein 1 subunit alpha [OS=Homo sapiens]	11	TCP1	358596	203159	378703	260347	114923	168750	-
P18054	High	Arachidonate 12-lipoxygenase, 12S-type [OS=Homo sapiens]	1	ALOX12	29368.4	14217.6	17989.5	21322	8042.62	8016.14	-
P18085	High	ADP-ribosylation factor 4 [OS=Homo sapiens]	5	ARF4	1.02344e+06	738552	1.22065e+06	743034	417784	543922	-
P18206	High	Vinculin [OS=Homo sapiens]	21	VCL	2.3227e+06	1.43239e+06	1.78069e+06	1.68632e+06	810272	793475	Oxidation [K1103]
P18428	High	lipopolysaccharide-binding protein [OS=Homo sapiens]	3	LBP	11271.6	11753.8	20570.6	8183.35	6648.89	9166.25	-
P18669	High	Phosphoglycerate mutase 1 [OS=Homo sapiens]	2	PGAM1; LOC643576	77561	32375.5	91432.9	56310.7	18314.2	40742.5	-
P19652	High	Alpha-1-acid glycoprotein 2 [OS=Homo sapiens]	3	ORM2	170807	499381	331037	124009	282489	147510	-
P19784	High	casein kinase II subunit alpha' [OS=Homo sapiens]	1	CSNK2A2	10881.9	23783.6	23577.9	7900.49	13453.9	10506.3	-
P19801	High	Amiloride-sensitive amine oxidase [copper-containing] [OS=Homo sapiens]	7	ABP1; AOC1	126753	296774	461578	92025.1	167879	205679	-
P20160	High	Azurocidin [OS=Homo sapiens]	4	AZU1	70279.1	121965	56978.2	51023.8	68993.2	25389.5	-
P20700	High	Lamin-B1 [OS=Homo sapiens]	7	LMNB1	36650.7	514061	89805.7	26609.1	290794	40017.4	-
P20702	High	Integrin alpha-X [OS=Homo sapiens]	1	ITGAX	1.05309e+06	687254	1.14244e+06	764563	388765	509071	Oxidation [P274]
P21266	High	glutathione S-transferase Mu 3 [OS=Homo sapiens]	5	GSTM3	149678	372499	79605.7	108669	210715	35472.3	-
P21281	High	V-type proton ATPase subunit B, brain isoform [OS=Homo sapiens]	3	ATP6V1B2	463337	303637	386677	336391	171761	172303	-
P21283	High	V-type proton ATPase subunit C 1 [OS=Homo sapiens]	2	ATP6V1C1	39484.4	40699.8	-	28666.3	23023.1	-	-
P21333	High	Filamin-A [OS=Homo sapiens]	56	FLNA	2.28815e+06	2.36104e+06	1.90134e+06	1.66124e+06	1.33559e+06	847237	-
P21399	High	Cytoplasmic aconitate hydratase [OS=Homo sapiens]	1	ACO1	17741.3	20854.8	34929.6	12880.5	11797.1	15564.6	-
P21695-1	High	Glycerol-3-phosphate dehydrogenase [NAD(+)], cytoplasmic [OS=Homo sapiens]	10	GPD1	601176	340779	485529	436465	192772	216352	-
P21796	High	voltage-dependent anion-selective channel protein 1 [OS=Homo sapiens]	10	VDAC1	2.49344e+06	2.98789e+06	2.8235e+06	1.81028e+06	1.69019e+06	1.25815e+06	-
P21912	High	Succinate dehydrogenase [ubiquinone] iron-sulfur subunit, mitochondrial [OS=Homo sapiens]	6	SDHB	391074	323079	248178	283927	182759	110588	-
P21964-1	High	Catechol O-methyltransferase [OS=Homo sapiens]	1	COMT	30887	29245.7	23187	22424.5	16543.7	10332.1	-
P21980	High	Protein-glutamine gamma-glutamyltransferase 2 [OS=Homo sapiens]	24	TGM2	4.59434e+06	1.10562e+07	4.62748e+06	3.33557e+06	6.25428e+06	2.062e+06	Oxidation [P251; K663]
P22061	High	protein-L-isoaspartate(D-aspartate) O-methyltransferase [OS=Homo sapiens]	1	PCMT1	66794.1	41279	45006.8	48493.7	23350.7	20055	-
P22314	High	Ubiquitin-like modifier-activating enzyme 1 [OS=Homo sapiens]	12	UBA1	677021	495857	629898	491529	280496	280683	Oxidation [P638]
P22352	High	Glutathione peroxidase 3 [OS=Homo sapiens]	6	GPX3	1.97852e+07	6.46701e+07	5.65197e+07	1.43644e+07	3.65826e+07	2.51852e+07	Oxidation [P157; P194]
P22392	High	nucleoside diphosphate kinase b [OS=Homo sapiens]	3	NME2; NME1-NME2	108681	131551	120207	78904.2	74415.5	53564.4	-
P22528	High	Cornifin-B [OS=Homo sapiens]	1	SPRR1B	275643	62348.7	96602.8	200122	35269.4	43046.2	-
P22532	High	small proline-rich protein 2D [OS=Homo sapiens]	2	SPRR2D	693910	212870	160605	503791	120416	71565.7	-
P22626	High	heterogeneous nuclear ribonucleoproteins A2/B1 [OS=Homo sapiens]	10	HNRNPA2B1	349834	3.02671e+06	218932	253986	1.71215e+06	97555.9	-
P22695	High	Cytochrome b-c1 complex subunit 2, mitochondrial [OS=Homo sapiens]	12	UQCRC2	1.05653e+06	638454	702324	767059	361160	312956	-
P22748	High	Carbonic anhydrase 4 [OS=Homo sapiens]	2	CA4	64906.2	41323.1	25946.6	47123	23375.6	11561.8	-
P23396-1	High	40S ribosomal protein S3 [OS=Homo sapiens]	7	RPS3	564775	210864	798967	410037	119281	356020	-
P23490	Medium	loricrin [OS=Homo sapiens]	1	LOR	48361.2	30314.4	51563.7	35111.1	17148.2	22976.8	-
P23526-1	High	Adenosylhomocysteinase [OS=Homo sapiens]	4	AHCY	149483	-	119431	108527	-	53218.5	-
P23786	High	Carnitine O-palmitoyltransferase 2, mitochondrial [OS=Homo sapiens]	3	CPT2	368527	412185	236965	267557	233165	105592	-
P23946	High	chymase [OS=Homo sapiens]	2	CMA1	12127	53169.4	-	8804.44	30076.8	-	-
P24468	High	COUP transcription factor 2 [OS=Homo sapiens]	1	NR2F2	7434.14	14508.9	15456.5	5397.32	8207.41	6887.4	-
P24539	High	ATP synthase F(0) complex subunit B1, mitochondrial [OS=Homo sapiens]	6	ATP5F1	197623	112394	128471	143478	63579.1	57246.9	-
P24752	High	Acetyl-CoA acetyltransferase, mitochondrial [OS=Homo sapiens]	15	ACAT1	5.64986e+06	3.13863e+06	2.61954e+06	4.1019e+06	1.77546e+06	1.16727e+06	Oxidation [P329]
P24844-1	High	Myosin regulatory light polypeptide 9 [OS=Homo sapiens]	3	MYL9	3.86296e+06	3.24976e+06	3.14871e+06	2.80458e+06	1.83832e+06	1.40307e+06	-
P25311	High	Zinc-alpha-2-glycoprotein [OS=Homo sapiens]	4	AZGP1	52226.8	34622.3	54981	37917.6	19585.1	24499.5	-
P25325	High	3-mercaptopyruvate sulfurtransferase [OS=Homo sapiens]	3	MPST	50636.4	125213	46571.2	36762.9	70830.3	20752.1	-
P25391	High	Laminin subunit alpha-1 [OS=Homo sapiens]	3	LAMA1	17280.7	25440.5	-	12546.1	14391.2	-	-
P25398	High	40S ribosomal protein S12 [OS=Homo sapiens]	3	RPS12	256845	112241	218991	186474	63492.4	97582.5	-
P25705-1	High	ATP synthase subunit alpha, mitochondrial [OS=Homo sapiens]	21	ATP5A1	1.48486e+07	5.94372e+06	8.5019e+06	1.07803e+07	3.36224e+06	3.78845e+06	Oxidation [P478]
P25940	Medium	Collagen alpha-3(V) chain [OS=Homo sapiens]	1	COL5A3	25193.7	10479	-	18291	5927.78	-	-
P26006	High	Integrin alpha-3 [OS=Homo sapiens]	7	ITGA3	242351	201520	440979	175951	113996	196500	-
P26038	High	Moesin [OS=Homo sapiens]	9	MSN	3.89345e+06	1.48584e+06	3.87626e+06	2.82671e+06	840510	1.72726e+06	-
P26373-1	High	60S ribosomal protein L13 [OS=Homo sapiens]	4	RPL13	448654	376480	262412	325731	212967	116931	-
P26583	High	High mobility group protein B2 [OS=Homo sapiens]	1	HMGB2	34840.9	-	26758.4	25295.1	-	11923.5	-
P26641	High	elongation factor 1-gamma [OS=Homo sapiens]	4	EEF1G	234747	142712	192668	170430	80729.1	85852.8	-
P27144	High	Adenylate kinase 4, mitochondrial [OS=Homo sapiens]	9	AK4; LOC100507855	1.82245e+06	2.43245e+06	859009	1.32313e+06	1.37599e+06	382775	-
P27338	High	Amine oxidase [flavin-containing] B [OS=Homo sapiens]	4	MAOB	118823	147786	89524.9	86267.5	83599.5	39892.3	-
P27348	High	14-3-3 protein theta [OS=Homo sapiens]	4	YWHAQ	110413	71040.4	78826.8	80161.9	40186.1	35125.2	-
P27449	High	V-type proton ATPase 16 kDa proteolipid subunit [OS=Homo sapiens]	1	ATP6V0C	244592	132177	80218.8	177578	74769.8	35745.5	Oxidation [P49; K54]
P27635	High	60S ribosomal protein L10 [OS=Homo sapiens]	1	RPL10	232289	215966	239769	168646	122167	106841	-
P27824	High	Calnexin [OS=Homo sapiens]	6	CANX	194603	333114	210436	141285	188436	93770.5	-
P28331-1	High	NADH-ubiquinone oxidoreductase 75 kDa subunit, mitochondrial [OS=Homo sapiens]	13	NDUFS1	1.45481e+06	841506	927823	1.05622e+06	476023	413438	-
P28482	High	mitogen-activated protein kinase 1 [OS=Homo sapiens]	4	MAPK1	122212	56335.9	62718.1	88728	31868.1	27947.2	-
P28838	High	cytosol aminopeptidase [OS=Homo sapiens]	1	LAP3	13788.5	19041.3	25696.5	10010.7	10771.3	11450.4	-
P29508	High	Serpin B3 [OS=Homo sapiens]	3	SERPINB3	58250.9	33517.7	41376.5	42291.2	18960.3	18437.4	-
P29590	High	Protein PML [OS=Homo sapiens]	17	PML	1.66212e+06	955473	979080	1.20673e+06	540492	436278	-
P30038	High	Delta-1-pyrroline-5-carboxylate dehydrogenase, mitochondrial [OS=Homo sapiens]	19	ALDH4A1	1.82536e+06	8.67773e+06	1.87755e+06	1.32525e+06	4.90881e+06	836638	-
P30039	High	Phenazine biosynthesis-like domain-containing protein [OS=Homo sapiens]	2	PBLD	56032.9	94077.2	67346.7	40680.9	53217.5	30009.7	-
P30041	High	Peroxiredoxin-6 [OS=Homo sapiens]	5	PRDX6	391008	174687	327477	283878	98816.7	145924	-
P30043	High	flavin reductase (NADPH) [OS=Homo sapiens]	3	BLVRB	73130.1	260286	29294	53093.7	147238	13053.4	-
P30044-1	High	Peroxiredoxin-5, mitochondrial [OS=Homo sapiens]	5	PRDX5	73399.9	59753.6	40740.5	53289.6	33801.4	18154	-
P30046	High	D-dopachrome decarboxylase [OS=Homo sapiens]	3	DDT	174367	16667.8	143715	126593	9428.65	64039.2	-
P30048	High	Thioredoxin-dependent peroxide reductase, mitochondrial [OS=Homo sapiens]	4	PRDX3	460604	351918	423704	334407	199073	188802	-
P30049	High	ATP synthase subunit delta, mitochondrial [OS=Homo sapiens]	1	ATP5D	48478.7	20871.4	41874.3	35196.4	11806.5	18659.2	-
P30050-1	High	60S ribosomal protein L12 [OS=Homo sapiens]	4	RPL12	281000	215254	266306	204011	121765	118666	-
P30084	High	Enoyl-CoA hydratase, mitochondrial [OS=Homo sapiens]	8	ECHS1	2.87319e+06	809194	1.11688e+06	2.08599e+06	457744	497682	-
P30085-1	High	UMP-CMP kinase [OS=Homo sapiens]	2	CMPK1	13659.3	82981.4	7832.08	9916.9	46940.9	3489.98	Oxidation [K171]
P30086	High	phosphatidylethanolamine-binding protein 1 [OS=Homo sapiens]	6	PEBP1	731658	339282	256189	531196	191925	114158	-
P30154	High	Serine/threonine-protein phosphatase 2A 65 kDa regulatory subunit A beta isoform [OS=Homo sapiens]	2	PPP2R1B	1.4624e+06	839273	1.43355e+06	1.06173e+06	474759	638788	-
P30626-1	High	Sorcin [OS=Homo sapiens]	3	SRI	123765	74408.8	100858	89855.8	42091.5	44942.3	-
P30837	High	Aldehyde dehydrogenase X, mitochondrial [OS=Homo sapiens]	11	ALDH1B1	290619	401307	578898	210995	227011	257957	-
P31025	High	Lipocalin-1 [OS=Homo sapiens]	1	LCN1	46035.4	44922.5	22396.7	33422.5	25411.7	9979.97	-
P31040	High	Succinate dehydrogenase [ubiquinone] flavoprotein subunit, mitochondrial [OS=Homo sapiens]	12	SDHA	394596	255914	145620	286484	144765	64888.3	-
P31689-1	High	DnaJ homolog subfamily A member 1 [OS=Homo sapiens]	3	DNAJA1	47967.7	221794	32815.2	34825.4	125464	14622.5	-
P31930	High	Cytochrome b-c1 complex subunit 1, mitochondrial [OS=Homo sapiens]	10	UQCRC1	593186	287862	370435	430663	162838	165066	-
P31937	High	3-hydroxyisobutyrate dehydrogenase, mitochondrial [OS=Homo sapiens]	1	HIBADH	29176.8	15442.5	14955.4	21182.9	8735.5	6664.12	-
P31944	High	Caspase-14 [OS=Homo sapiens]	3	CASP14	107627	67190.6	99492.4	78139.1	38008.4	44333.8	-
P31946	High	14-3-3 protein beta/alpha [OS=Homo sapiens]	2	YWHAB	30882.8	-	24235.6	22421.4	-	10799.4	-
P31949	High	protein S100-A11 [OS=Homo sapiens]	1	S100A11	123487	78072.3	87834.1	89653.8	44163.9	39138.9	-
P32969	High	60S ribosomal protein L9 [OS=Homo sapiens]	3	RPL9	138597	103227	190500	100624	58393.4	84886.7	-
P33176	High	Kinesin-1 heavy chain [OS=Homo sapiens]	3	KIF5B	37557.1	42825.6	41962.2	27267.1	24225.6	18698.3	-
P34096	High	Ribonuclease 4 [OS=Homo sapiens]	1	RNASE4	25510.4	16103.2	29073.8	18521	9109.23	12955.3	-
P35030	High	Trypsin-3 [OS=Homo sapiens]	1	PRSS3	50804	46112.9	35791.7	36884.6	26085.1	15948.8	-
P35221	High	Catenin alpha-1 [OS=Homo sapiens]	10	CTNNA1	363739	538962	239006	264081	304880	106501	-
P35270	High	Sepiapterin reductase [OS=Homo sapiens]	2	SPR	38166.2	41799.6	35917.3	27709.3	23645.2	16004.7	-
P35527	High	Keratin, type I cytoskeletal 9 [OS=Homo sapiens]	34	KRT9	2.0221e+08	7.90029e+07	1.50565e+08	1.46808e+08	4.46903e+07	6.70919e+07	Oxidation [K271; K289; K290]
P35555	High	Fibrillin-1 [OS=Homo sapiens]	78	FBN1	2.68796e+06	6.61844e+07	6.72476e+06	1.95151e+06	3.74392e+07	2.99656e+06	Oxidation [P220; P374; P378; P1090; K1109; P1246; P1258; K1276; K1300; P1465; P2373; K2510]
P35558	High	phosphoenolpyruvate carboxykinase, cytosolic [GTP] [OS=Homo sapiens]	13	PCK1	44873.3	2.05127e+06	109286	32578.8	1.16036e+06	48697.8	-
P35579-2	High	Isoform 2 of Myosin-9 [OS=Homo sapiens]	14	MYH9	3.74997e+07	1.60984e+07	2.94244e+07	2.72254e+07	9.10652e+06	1.31115e+07	Oxidation [P12; K89; P455; K746; K804; K935; K960]
P35580	High	Myosin-10 [OS=Homo sapiens]	74	MYH10	3.00421e+07	1.76238e+07	2.56925e+07	2.18111e+07	9.96941e+06	1.14486e+07	Oxidation [P151; P733; K982]
P35625	High	Metalloproteinase inhibitor 3 [OS=Homo sapiens]	7	TIMP3	666236	237363	704967	483699	134271	314134	-
P35749	High	Myosin-11 [OS=Homo sapiens]	59	MYH11	4.28734e+06	1.02073e+06	1.00567e+06	3.11268e+06	577408	448125	Oxidation [K232; K1837]
P35754	High	Glutaredoxin-1 [OS=Homo sapiens]	3	GLRX	421735	179490	179790	306187	101534	80114.5	-
P35908	High	Keratin, type II cytoskeletal 2 epidermal [OS=Homo sapiens]	29	KRT2	2.25214e+08	1.2577e+08	1.6463e+08	1.63509e+08	7.11455e+07	7.33592e+07	-
P35914	High	Hydroxymethylglutaryl-CoA lyase, mitochondrial [OS=Homo sapiens]	4	HMGCL	172200	161657	131396	125020	91445.8	58550.2	-
P36404	High	ADP-ribosylation factor-like protein 2 [OS=Homo sapiens]	4	ARL2	86659.6	80440	27536.8	62916.4	45503.2	12270.4	-
P36578	High	60S ribosomal protein L4 [OS=Homo sapiens]	10	RPL4	818557	572327	1.22775e+06	594287	323753	547087	-
P36955	High	Pigment epithelium-derived factor [OS=Homo sapiens]	6	SERPINF1	174235	145049	257849	126498	82051.4	114898	-
P36957	High	Dihydrolipoyllysine-residue succinyltransferase component of 2-oxoglutarate dehydrogenase complex, mitochondrial [OS=Homo sapiens]	7	DLST	855918	614929	886282	621411	347853	394928	-
P36980-1	High	Complement factor H-related protein 2 [OS=Homo sapiens]	1	CFHR2	20949.2	16090.2	-	15209.5	9101.88	-	-
P37108	High	Signal recognition particle 14 kDa protein [OS=Homo sapiens]	3	SRP14	147283	309366	107878	106930	175002	48070.4	-
P38117	High	electron transfer flavoprotein subunit beta [OS=Homo sapiens]	7	ETFB	255096	329978	185270	185204	186662	82556.5	-
P38606	High	V-type proton ATPase catalytic subunit A [OS=Homo sapiens]	6	ATP6V1A	250999	157787	241343	182229	89257	107543	-
P38919	High	Eukaryotic initiation factor 4A-III [OS=Homo sapiens]	5	EIF4A3	112884	258442	139623	81956	146195	62216	-
P39019	High	40S ribosomal protein S19 [OS=Homo sapiens]	1	RPS19	41825	19921.3	-	30365.7	11269.1	-	-
P39023	High	60S ribosomal protein L3 [OS=Homo sapiens]	9	RPL3	609927	439115	584175	442817	248398	260309	Oxidation [K334]
P39656	High	Dolichyl-diphosphooligosaccharide--protein glycosyltransferase 48 kDa subunit [OS=Homo sapiens]	2	DDOST	52686.1	30591.4	80783.9	38251.1	17304.9	35997.3	-
P40121	High	Macrophage-capping protein [OS=Homo sapiens]	4	CAPG	227696	230730	39530.7	165311	130519	17614.9	-
P40222	High	alpha-taxilin [OS=Homo sapiens]	1	TXLNA	37270.9	9911.69	25731.5	27059.4	5606.84	11466	-
P40763	High	Signal transducer and activator of transcription 3 [OS=Homo sapiens]	7	STAT3	90771.2	176131	52932.4	65901.5	99633.6	23586.7	-
P40939	High	Trifunctional enzyme subunit alpha, mitochondrial [OS=Homo sapiens]	22	HADHA	2.24655e+06	2.25336e+06	1.98856e+06	1.63104e+06	1.27468e+06	886103	-
P41208	High	centrin-2 [OS=Homo sapiens]	4	CETN2	10203.8	149959	-	7408.1	84828.7	-	-
P41222	High	Prostaglandin-H2 D-isomerase [OS=Homo sapiens]	2	PTGDS	84739.2	123848	37417.1	61522.2	70058.1	16673.1	-
P42126	High	Enoyl-CoA delta isomerase 1, mitochondrial [OS=Homo sapiens]	2	ECI1	37834.2	19372	-	27468.3	10958.3	-	-
P42704	High	Leucine-rich PPR motif-containing protein, mitochondrial [OS=Homo sapiens]	40	LRPPRC	1.12489e+06	3.00417e+06	606065	816687	1.6994e+06	270063	-
P42765	High	3-ketoacyl-CoA thiolase, mitochondrial [OS=Homo sapiens]	16	ACAA2	1.97581e+06	1.51427e+06	977641	1.43447e+06	856591	435637	-
P42766	High	60S ribosomal protein L35 [OS=Homo sapiens]	2	RPL35	271606	208002	43542.8	197190	117662	19402.7	-
P43155	High	Carnitine O-acetyltransferase [OS=Homo sapiens]	1	CRAT	15315.8	29273.6	23049.1	11119.6	16559.5	10270.7	-
P43304	High	Glycerol-3-phosphate dehydrogenase, mitochondrial [OS=Homo sapiens]	1	GPD2	29306.9	21239.7	23835.6	21277.3	12014.9	10621.1	-
P45954	High	Short/branched chain specific acyl-CoA dehydrogenase, mitochondrial [OS=Homo sapiens]	8	ACADSB	630568	233942	276695	457804	132336	123296	-
P46777	High	60S ribosomal protein L5 [OS=Homo sapiens]	4	RPL5	225336	153934	372218	163598	87077.2	165860	-
P46783	High	40S ribosomal protein S10 [OS=Homo sapiens]	1	RPS10	83020.4	59384.1	89500.6	60274.3	33592.3	39881.5	-
P46926	High	glucosamine-6-phosphate isomerase 1 [OS=Homo sapiens]	2	GNPDA1	26411.6	-	24987.7	19175.3	-	11134.5	-
P46939	High	Utrophin [OS=Homo sapiens]	6	UTRN	-	72841.2	54828.3	-	41204.8	24431.5	-
P47755	High	F-actin-capping protein subunit alpha-2 [OS=Homo sapiens]	3	CAPZA2	152323	210028	265771	110589	118808	118428	-
P47985	High	cytochrome b-c1 complex subunit Rieske, mitochondrial [OS=Homo sapiens]	2	UQCRFS1	101082	91144.3	59008.1	73387.1	51558.4	26294	-
P48047	High	ATP synthase subunit O, mitochondrial [OS=Homo sapiens]	8	ATP5O	1.00786e+06	643062	593325	731724	363767	264386	-
P48061	High	Stromal cell-derived factor 1 [OS=Homo sapiens]	1	CXCL12	16184.3	28524.4	22724.4	11750.1	16135.7	10126	-
P49207	High	60S ribosomal protein L34 [OS=Homo sapiens]	1	RPL34	134002	3.24728e+06	310440	97288	1.83692e+06	138332	-
P49411	High	elongation factor Tu, mitochondrial [OS=Homo sapiens]	22	TUFM	1.72694e+07	1.89704e+07	1.41231e+07	1.25379e+07	1.07312e+07	6.29327e+06	Oxidation [P157]
P49458	High	Signal recognition particle 9 kDa protein [OS=Homo sapiens]	1	SRP9; SRP9P1	54248.5	123852	58880.5	39385.3	70060.3	26237.2	-
P49773	High	Histidine triad nucleotide-binding protein 1 [OS=Homo sapiens]	3	HINT1	267047	129166	87669	193881	73066.3	39065.3	-
P50053	High	Ketohexokinase [OS=Homo sapiens]	3	KHK	102501	352154	106453	74417.2	199206	47435.3	-
P50402	High	Emerin [OS=Homo sapiens]	4	EMD	-	217070	10396.5	-	122792	4632.7	-
P50454	High	Serpin H1 [OS=Homo sapiens]	12	SERPINH1	146784	1.48925e+06	877287	106568	842436	390919	-
P50990	High	T-complex protein 1 subunit theta [OS=Homo sapiens]	6	CCT8	278593	170546	304275	202263	96474.6	135585	-
P50991	High	T-complex protein 1 subunit delta [OS=Homo sapiens]	11	CCT4	567141	292104	508689	411754	165237	226672	-
P51148	High	Ras-related protein Rab-5C [OS=Homo sapiens]	5	RAB5C	351603	400584	345814	255270	226602	154095	-
P51149	High	ras-related protein Rab-7a [OS=Homo sapiens]	5	RAB7A	239356	188769	250696	173777	106783	111710	-
P51570	High	galactokinase [OS=Homo sapiens]	3	GALK1	152392	299994	47161.3	110639	169700	21015.1	-
P51648	High	Fatty aldehyde dehydrogenase [OS=Homo sapiens]	4	ALDH3A2	71290.9	152915	99229.3	51758.4	86500.9	44216.6	-
P51884	High	Lumican [OS=Homo sapiens]	8	LUM	1.54648e+06	663700	536777	1.12277e+06	375442	239188	-
P51888	High	prolargin [OS=Homo sapiens]	13	PRELP	1.30961e+06	620171	398464	950801	350818	177556	Oxidation [K159]
P51911	High	Calponin-1 [OS=Homo sapiens]	1	CNN1	23867.5	12566.8	26820	17328.2	7108.79	11951	-
P51970	High	NADH dehydrogenase [ubiquinone] 1 alpha subcomplex subunit 8 [OS=Homo sapiens]	1	NDUFA8	49265.1	27791.7	24574	35767.3	15721.2	10950.2	-
P51991-1	High	Heterogeneous nuclear ribonucleoprotein A3 [OS=Homo sapiens]	3	HNRNPA3	26024.8	219877	30546.7	18894.5	124380	13611.6	-
P52272	High	Heterogeneous nuclear ribonucleoprotein M [OS=Homo sapiens]	20	HNRNPM	1.94172e+06	4.98151e+06	1.5456e+06	1.40972e+06	2.81794e+06	688721	-
P52565-1	High	rho GDP-dissociation inhibitor 1 [OS=Homo sapiens]	1	ARHGDIA	58458	39968	35383	42441.5	22609.1	15766.6	-
P52597	High	Heterogeneous nuclear ribonucleoprotein F [OS=Homo sapiens]	4	HNRNPF	165570	250731	116048	120207	141833	51710.9	Oxidation [K347]
P52758	High	2-iminobutanoate/2-iminopropanoate deaminase [OS=Homo sapiens]	4	HRSP12; RIDA	536145	150532	425602	389251	85153.1	189648	-
P53420	High	Collagen alpha-4(IV) chain [OS=Homo sapiens]	45	COL4A4	7.28535e+07	4.97515e+07	1.35502e+08	5.28929e+07	2.81434e+07	6.03795e+07	Oxidation [P115; P118; P124; P127; P129; P130; P148; P151; P278; P284; P286; P287; P576; P577; P580; P583; P615; P620; P621; P629; P630; P635; P637; P638; P709; P712; P718; P720; P721; P779; K782; P784; P788; P791; P796; P800; K806; P808; P818; P821; P823; P824; P833; P836; P839; P842; P845; P848; P851; K854; P911; P914; P917; P974; P977; P979; P980; P986; P1009; P1010; P1044; P1047; P1053; P1056…
P53597	High	Succinate--CoA ligase [ADP/GDP-forming] subunit alpha, mitochondrial [OS=Homo sapiens]	5	SUCLG1	555857	858863	390087	403562	485841	173823	-
P53618	High	Coatomer subunit beta [OS=Homo sapiens]	4	COPB1	53096.9	19245.5	66169.2	38549.3	10886.8	29485	-
P53621-1	High	coatomer subunit alpha [OS=Homo sapiens]	20	COPA	1.68205e+06	267897	808709	1.2212e+06	151544	360361	-
P54619-1	High	5'-AMP-activated protein kinase subunit gamma-1 [OS=Homo sapiens]	4	PRKAG1	282605	69182.4	131781	205176	39135.1	58721.6	-
P54710-1	High	sodium/potassium-transporting ATPase subunit gamma [OS=Homo sapiens]	1	FXYD2	60000.3	29753.5	25577.8	43561.3	16830.9	11397.5	-
P54819	High	Adenylate kinase 2, mitochondrial [OS=Homo sapiens]	6	AK2	319825	176886	196667	232199	100061	87635	Oxidation [P23; P24]
P54868-1	High	Hydroxymethylglutaryl-CoA synthase, mitochondrial [OS=Homo sapiens]	2	HMGCS2	73698.7	67551.8	-	53506.6	38212.7	-	-
P54886	High	delta-1-pyrroline-5-carboxylate synthase [OS=Homo sapiens]	3	ALDH18A1	15198.1	29659.4	-	11034.1	16777.7	-	-
P55001	High	Microfibrillar-associated protein 2 [OS=Homo sapiens]	2	MFAP2	19446	196271	32328.9	14118.2	111027	14405.8	-
P55072	High	Transitional endoplasmic reticulum ATPase [OS=Homo sapiens]	8	VCP	299131	210814	555734	217175	119253	247635	-
P55083	High	Microfibril-associated glycoprotein 4 [OS=Homo sapiens]	1	MFAP4	42537.6	10521.8	70320.6	30883	5951.96	31334.9	-
P55084	High	Trifunctional enzyme subunit beta, mitochondrial [OS=Homo sapiens]	18	HADHB	3.41397e+06	2.24749e+06	1.80286e+06	2.4786e+06	1.27136e+06	803356	Oxidation [K474]
P55103	High	Inhibin beta C chain [OS=Homo sapiens]	1	INHBC	106615	148290	129639	77404.3	83884.8	57767	-
P55268	High	laminin subunit beta-2 [OS=Homo sapiens]	80	LAMB2	2.73736e+08	3.24942e+08	3.49396e+08	1.98737e+08	1.83813e+08	1.55691e+08	Oxidation [P994; K1237; P1413; P1546; K1714]
P55290	High	cadherin-13 [OS=Homo sapiens]	1	CDH13	16413.2	112179	-	11916.3	63457.4	-	-
P55795	High	heterogeneous nuclear ribonucleoprotein H2 [OS=Homo sapiens]	4	HNRNPH2	948159	2.22176e+06	534049	688380	1.2568e+06	237972	Oxidation [P314]
P56199	High	Integrin alpha-1 [OS=Homo sapiens]	10	ITGA1	334563	222262	573104	242899	125729	255375	-
P56385	High	ATP synthase subunit e, mitochondrial [OS=Homo sapiens]	2	ATP5I	96839.8	44796.6	64375.6	70307.4	25340.5	28685.8	-
P56537-1	High	eukaryotic translation initiation factor 6 [OS=Homo sapiens]	3	EIF6	8701.03	102900	20244.5	6317.1	58208.1	9020.95	-
P56556	High	NADH dehydrogenase [ubiquinone] 1 alpha subcomplex subunit 6 [OS=Homo sapiens]	3	NDUFA6	118963	67175.4	104562	86369.1	37999.7	46592.7	-
P57105	Medium	Synaptojanin-2-binding protein OS=Homo sapiens GN=SYNJ2BP PE=1 SV=2	1	SYNJ2BP	26971.2	14654.2	8507.18	19581.6	8289.57	3790.8	-
P58166	High	Inhibin beta E chain [OS=Homo sapiens]	8	INHBE	259373	425349	130842	188309	240611	58303.2	-
P59190-1	High	Ras-related protein Rab-15 [OS=Homo sapiens]	1	RAB15	39284.1	-	32536.2	28521	-	14498.1	-
P59665	High	Neutrophil defensin 1 [OS=Homo sapiens]	3	DEFA1; DEFA1B	1.32756e+07	8.39922e+06	2.37803e+06	9.63835e+06	4.75127e+06	1.05965e+06	-
P59998	High	Actin-related protein 2/3 complex subunit 4 [OS=Homo sapiens]	2	ARPC4	103610	63744.6	124109	75222.7	36059	55302.9	-
P60174-1	High	Isoform 2 of Triosephosphate isomerase [OS=Homo sapiens]	6	TPI1	307854	288058	222208	223508	162949	99015.7	-
P60660	High	Myosin light polypeptide 6 [OS=Homo sapiens]	1	MYL6	936245	785064	753805	679730	444094	335896	Oxidation [P72; K79]
P60866	High	40S ribosomal protein S20 [OS=Homo sapiens]	1	RPS20	49260.8	25799.6	18154.4	35764.2	14594.3	8089.62	-
P60953	High	Cell division control protein 42 homolog [OS=Homo sapiens]	4	CDC42	334478	171351	215763	242837	96929.5	96144	-
P61026	High	ras-related protein rab-10 [OS=Homo sapiens]	2	RAB10	168473	116476	262428	122314	65888.1	116938	-
P61088	High	ubiquitin-conjugating enzyme E2 N [OS=Homo sapiens]	3	UBE2N	167392	56334.6	68427.5	121529	31867.3	30491.3	-
P61158	High	actin-related protein 3 [OS=Homo sapiens]	6	ACTR3	224094	109239	196754	162696	61794.1	87673.7	-
P61160-1	High	Actin-related protein 2 [OS=Homo sapiens]	3	ACTR2	113764	106852	119813	82594.8	60444.2	53388.5	-
P61204	High	ADP-ribosylation factor 3 [OS=Homo sapiens]	3	ARF3	794312	396260	870034	576685	224156	387687	-
P61221	High	ATP-binding cassette sub-family E member 1 [OS=Homo sapiens]	2	ABCE1	14505.7	-	16727.1	10531.4	-	7453.61	-
P61224-1	High	Ras-related protein Rap-1b [OS=Homo sapiens]	2	RAP1B	44604.2	58714.3	61820.9	32383.4	33213.4	27547.4	-
P61326	High	Protein mago nashi homolog [OS=Homo sapiens]	1	MAGOH	30940.7	80965.8	54271.2	22463.5	45800.7	24183.3	-
P61586	High	Transforming protein RhoA [OS=Homo sapiens]	1	RHOA	601898	587884	581625	436988	332554	259172	-
P61626	High	lysozyme c [OS=Homo sapiens]	4	LYZ	853219	851864	737426	619452	481882	328597	-
P62070	High	Ras-related protein R-Ras2 [OS=Homo sapiens]	2	RRAS2	16937.2	23436	-	12296.7	13257.3	-	-
P62081	High	40S ribosomal protein S7 [OS=Homo sapiens]	2	RPS7	215251	113100	157449	156276	63978.3	70159.4	-
P62140	High	Serine/threonine-protein phosphatase PP1-beta catalytic subunit [OS=Homo sapiens]	3	PPP1CB	14789.8	41241.7	-	10737.7	23329.6	-	-
P62241	High	40S ribosomal protein S8 [OS=Homo sapiens]	8	RPS8	1.13547e+06	1.11692e+06	1.32202e+06	824370	631820	589093	-
P62258-1	High	14-3-3 protein epsilon [OS=Homo sapiens]	5	YWHAE	536198	517850	467341	389289	292937	208247	Acetyl [N-Term]
P62263	High	40S ribosomal protein S14 [OS=Homo sapiens]	4	RPS14	286475	194983	57932.3	207986	110298	25814.6	-
P62266	High	40S ribosomal protein S23 [OS=Homo sapiens]	1	RPS23	69782.8	80680.7	28888.7	50663.5	45639.4	12872.8	-
P62269	High	40S ribosomal protein S18 [OS=Homo sapiens]	5	RPS18	562735	223525	309668	408555	126444	137988	-
P62273-1	High	40S ribosomal protein S29 [OS=Homo sapiens]	1	RPS29	100550	43104.6	86336.8	73001.1	24383.4	38471.7	-
P62277	High	40S ribosomal protein S13 [OS=Homo sapiens]	4	RPS13	531765	381625	253674	386071	215877	113037	-
P62280	High	40S ribosomal protein S11 [OS=Homo sapiens]	5	RPS11	490469	333860	398175	356089	188858	177427	-
P62304	High	small nuclear ribonucleoprotein E [OS=Homo sapiens]	2	SNRPE	24975.5	108391	27512.7	18132.6	61314.3	12259.7	-
P62318	High	small nuclear ribonucleoprotein sm d3 [OS=Homo sapiens]	1	SNRPD3	39309.6	187492	64049.6	28539.4	106060	28540.5	-
P62330	High	ADP-ribosylation factor 6 [OS=Homo sapiens]	5	ARF6	236647	273723	321375	171810	154840	143205	-
P62424	High	60S ribosomal protein L7a [OS=Homo sapiens]	7	RPL7A	577726	422029	779272	419439	238733	347244	-
P62491-1	High	Ras-related protein Rab-11A [OS=Homo sapiens]	3	RAB11A	376546	338458	425161	273379	191458	189452	-
P62753	High	40S RIBOSOMAL PROTEIN S6 [OS=Homo sapiens]	4	RPS6	283307	187765	36055.7	205686	106215	16066.4	-
P62805	High	histone H4 [OS=Homo sapiens]	11	HIST1H4A; HIST1H4F; HIST1H4D; HIST1H4J; HIST2H4A; HIST2H4B; HIST1H4H; HIST1H4C; HIST4H4; HIST1H4E; HIST1H4I; HIST1H4B; HIST1H4K; HIST1H4L	6.97658e+08	6.29838e+08	8.29918e+08	5.06512e+08	3.56286e+08	3.69812e+08	Oxidation [K32; P33; K78; K80]
P62820	High	Ras-related protein Rab-1A [OS=Homo sapiens]	2	RAB1A	404120	587046	478218	293398	332080	213094	-
P62829	High	60S ribosomal protein L23 [OS=Homo sapiens]	3	RPL23	328035	210915	76949.8	238159	119310	34288.8	Oxidation [K66]
P62834	High	ras-related protein Rap-1A [OS=Homo sapiens]	2	RAP1A	640444	630373	788787	464974	356589	351484	-
P62851	Medium	40S ribosomal protein S25 [OS=Homo sapiens]	1	RPS25	80383.4	55399.1	40942.2	58359.8	31338.2	18243.9	-
P62857	High	40S ribosomal protein S28 [OS=Homo sapiens]	1	RPS28	46126.1	10983.8	18976.3	33488.3	6213.3	8455.85	-
P62879	High	Guanine nucleotide-binding protein G(I)/G(S)/G(T) subunit beta-2 [OS=Homo sapiens]	5	GNB2	608018	731846	924236	441432	413990	411840	-
P62891	High	60S ribosomal protein L39 [OS=Homo sapiens]	1	RPL39; RPL39P3	51284.1	42034.8	15002.5	37233.2	23778.2	6685.12	-
P62906	High	60S ribosomal protein L10A [OS=Homo sapiens]	5	RPL10A	185668	427017	355931	134799	241555	158603	-
P62913	High	60S ribosomal protein L11 [OS=Homo sapiens]	3	RPL11	561286	540084	449786	407504	305515	200425	-
P62937	High	peptidyl-prolyl cis-trans isomerase A [OS=Homo sapiens]	9	PPIA	1.32348e+06	2.23311e+06	814324	960871	1.26322e+06	362863	-
P62979	High	Ubiquitin-40S ribosomal protein S27a [OS=Homo sapiens]	2	RPS27A	1.48932e+06	3.2728e+07	2.29954e+06	1.08128e+06	1.85136e+07	1.02468e+06	-
P63000-1	High	Ras-related C3 botulinum toxin substrate 1 [OS=Homo sapiens]	4	RAC1	994586	452442	664859	722087	255937	296261	Oxidation [K147]
P63096-1	High	Guanine nucleotide-binding protein G(i) subunit alpha-1 [OS=Homo sapiens]	3	GNAI1	51519.5	77186.1	89640.2	37404.1	43662.6	39943.7	-
P63104-1	High	14-3-3 protein zeta/delta [OS=Homo sapiens]	4	YWHAZ	171763	166430	190843	124703	94145.9	85039.8	-
[truncated: 516 more rows]

## Sheet: TI cellular fraction (all)
Accession	Protein FDR Confidence: Combined	Description	# Unique Peptides	Gene	Abundances (Normalized): F2: Sample, T_37, Young	Abundances (Normalized): F3: Sample, T_29, Young	Abundances (Normalized): F6: Sample, T_15, Young	Abundance: F2: Sample, T_37, Young	Abundance: F3: Sample, T_29, Young	Abundance: F6: Sample, T_15, Young	Modifications
[truncated: 2,608 more rows]

[truncated: 1 more sheets: TI ECM fraction (all)]
