# Supplementary figures and images for: Kidney organoids recapitulate human basement membrane assembly in health and disease
Source: eLife journal article supplement (doi:10.7554/elife.73486), 2022-01-25

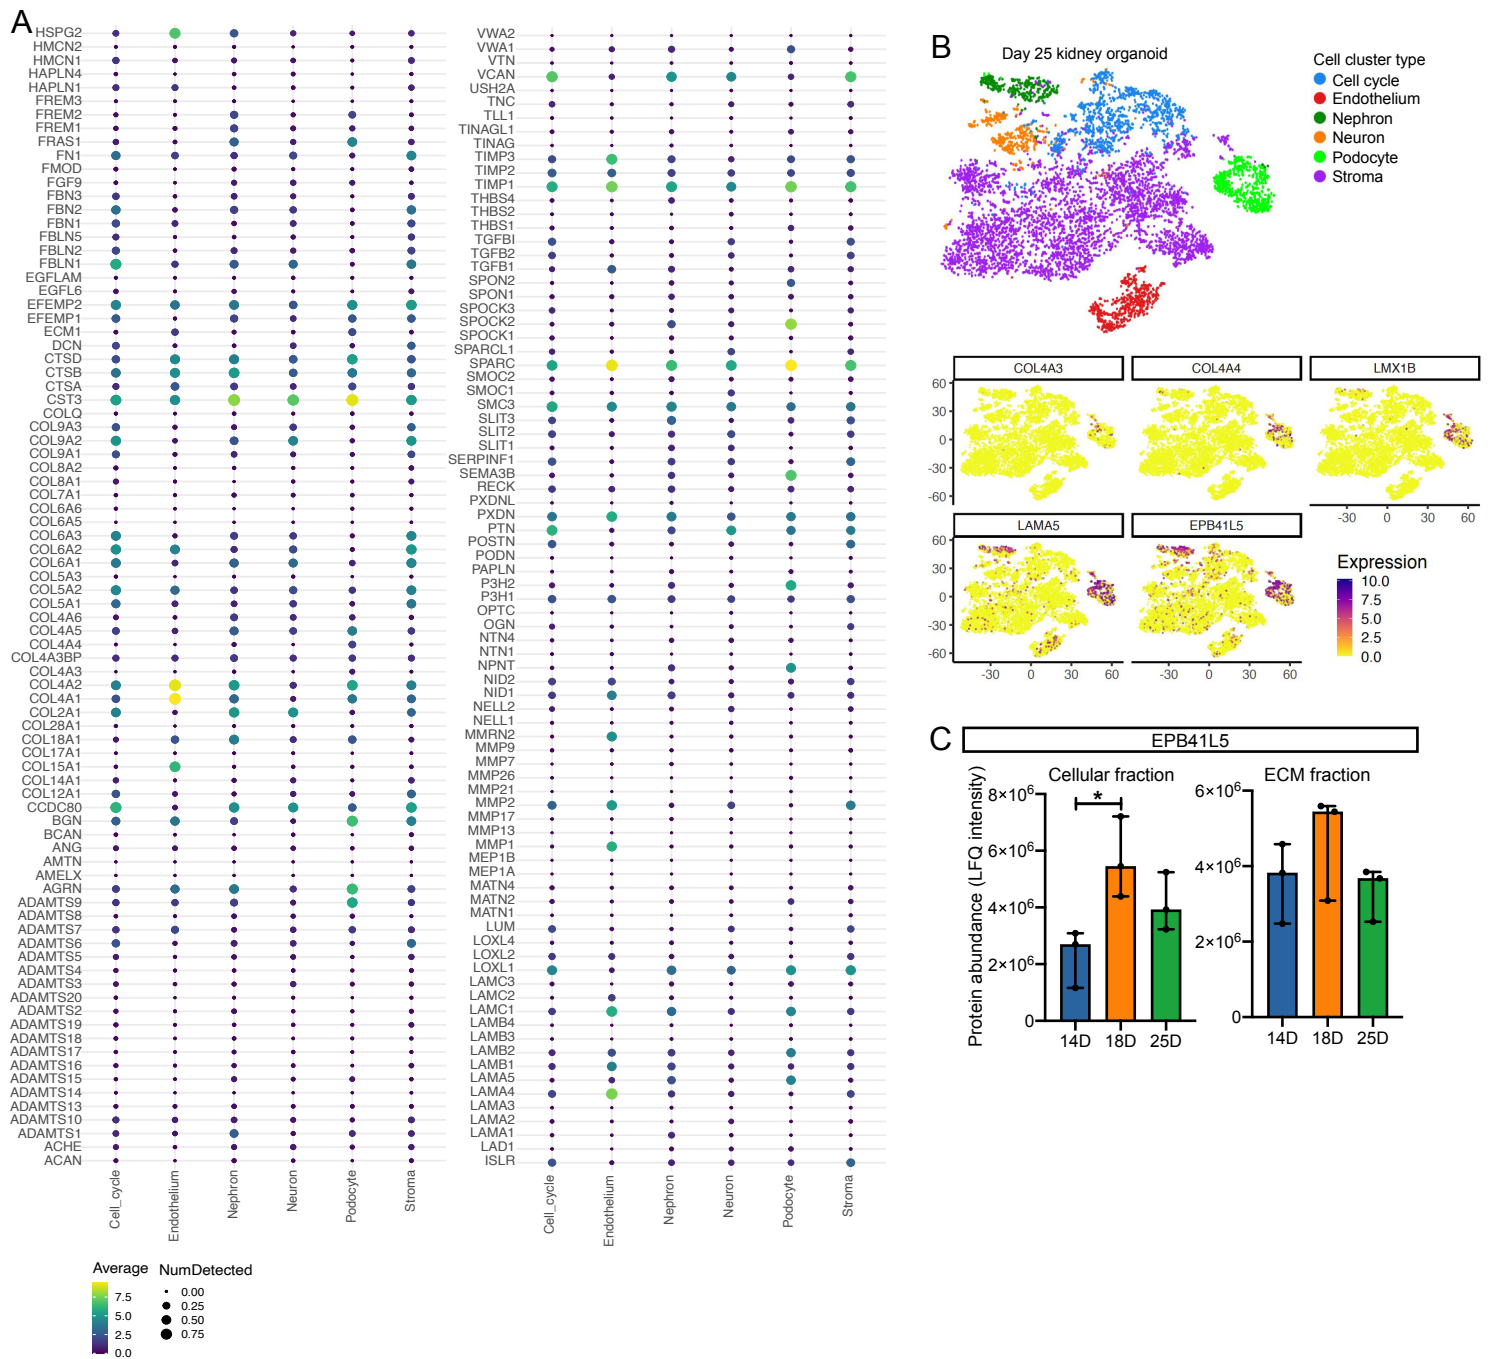

Supplement: supp [file elife-73486-supp-v1.zip]
